# Supplementary material
Source: PubMed Central journal article supplement (PMC4302335)
Supplement: NIHMS258838-supplement-Table_1.pdf [file NIHMS258838-supplement-Table_1.pdf]

**Identified Human Platelet Proteins**

|            |                |                                 |              |                      |                                   |                                       |
|------------|----------------|---------------------------------|--------------|----------------------|-----------------------------------|---------------------------------------|
| <b>No.</b> | <b>Protein</b> | <b>Matched (SEQUEST MASCOT)</b> | <b>emPAI</b> | <b>Strategy.Hits</b> | <b>PepMatched(SEQUEST MASCOT)</b> | <b>SpectraMatched(SEQUEST MASCOT)</b> |
| 1.         | IPI00327469    | Y Y                             | 0.97         | 1                    | 5 4                               | 22 31                                 |

\*Des: Alpha-2-HS-glycoprotein precursor

|                                                                       |   |   |        |
|-----------------------------------------------------------------------|---|---|--------|
| <b>SEQUEST:(PepMatched Observed.Hits Coverage)</b>                    | 5 | 2 | 22.06% |
| <b>Seq Charge Xcor Delta Proability PepHits</b>                       |   |   |        |
| LGEEVSVACK +2 3.357 0.384 0.9998 5                                    |   |   |        |
| QQAEHAVEGDCDFHILK +3 3.405 0.387 0.9997 1                             |   |   |        |
| QQAEHAVEGDCDFHILKQDGQFR +3 3.147 0.472 1.0000 5                       |   |   |        |
| HAFSPVASVESASGEVLHSPK +3 5.625 0.611 1.0000 10                        |   |   |        |
| VGQPGDAGAAGPVAPLCPGR +2 4.644 0.620 1.0000 6                          |   |   |        |
| <b>MASCOT:(PepMatched Observed.Hits Coverage)</b>                     | 4 | 2 | 22.06% |
| <b>Seq Charge ObservedMS ExpectedMS CalculatedMS Pepscore PepHits</b> |   |   |        |
| LGEEVSVACK +2 546.2737 1090.5329 1090.5328 0 66 7                     |   |   |        |
| HAFSPVASVESASGEVLHSPK +3 712.6939 2135.0599 2135.0647 0 86 13         |   |   |        |
| QQAEHAVEGDCDFHILKQDGQFR +3 891.0836 2670.2288 2670.2244 0 42 4        |   |   |        |
| VGQPGDAGAAGPVAPLCPGR +2 895.4554 1788.8962 1788.8940 0 101 6          |   |   |        |

|            |                |                                 |              |                      |                                   |                                       |
|------------|----------------|---------------------------------|--------------|----------------------|-----------------------------------|---------------------------------------|
| <b>No.</b> | <b>Protein</b> | <b>Matched (SEQUEST MASCOT)</b> | <b>emPAI</b> | <b>Strategy.Hits</b> | <b>PepMatched(SEQUEST MASCOT)</b> | <b>SpectraMatched(SEQUEST MASCOT)</b> |
| 2.         | IPI00200886    | Y Y                             | 0.14         | 3                    | 2 3                               | 4 6                                   |

\*Des: Neuronal C-SRC tyrosine-specific protein kinase

|                                                                       |   |   |       |
|-----------------------------------------------------------------------|---|---|-------|
| <b>SEQUEST:(PepMatched Observed.Hits Coverage)</b>                    | 2 | 1 | 9.23% |
| <b>Seq Charge Xcor Delta Proability PepHits</b>                       |   |   |       |
| KEPEERPTFEYLQAFLEDYFTSTEPQYQPGENL +3 4.124 0.518 1.0000 1             |   |   |       |
| SDVWSFGILLTELTK +2 2.977 0.489 0.9982 3                               |   |   |       |
| <b>MASCOT:(PepMatched Observed.Hits Coverage)</b>                     | 3 | 3 | 6.7%  |
| <b>Seq Charge ObservedMS ExpectedMS CalculatedMS Pepscore PepHits</b> |   |   |       |
| EVLQDQVER +2 494.2628 986.5110 986.5032 0.01 55 6                     |   |   |       |
| LIEDNEYTAR +2 612.3037 1222.5929 1222.5829 0.01 42 4                  |   |   |       |
| SDVWSFGILLTELTK +2 905.5005 1808.9865 1808.9560 0.03 57 2             |   |   |       |

|            |                |                                 |              |                      |                                   |                                       |
|------------|----------------|---------------------------------|--------------|----------------------|-----------------------------------|---------------------------------------|
| <b>No.</b> | <b>Protein</b> | <b>Matched (SEQUEST MASCOT)</b> | <b>emPAI</b> | <b>Strategy.Hits</b> | <b>PepMatched(SEQUEST MASCOT)</b> | <b>SpectraMatched(SEQUEST MASCOT)</b> |
| 3.         | IPI00358351    | Y Y                             | 0.37         | 2                    | 12 12                             | 17 21                                 |

\*Des: PREDICTED: similar to Diap1 protein

|                                                    |    |   |       |
|----------------------------------------------------|----|---|-------|
| <b>SEQUEST:(PepMatched Observed.Hits Coverage)</b> | 12 | 2 | 13.1% |
| <b>Seq Charge Xcor Delta Proability PepHits</b>    |    |   |       |
| EMVSYLHTSK +2 3.771 0.480 0.9999 1                 |    |   |       |
| FPDELAHVEK +2 2.998 0.402 0.9988 3                 |    |   |       |
| KSEGVTTILEEAK +2 2.792 0.288 0.9810 1              |    |   |       |
| SAMMYIQELR +2 2.702 0.305 0.9894 2                 |    |   |       |
| TAQNLSIFLGSFR +2 3.552 0.499 0.9998 1              |    |   |       |
| VQLNVFDEQGDEDFDLK +2 5.578 0.634 1.0000 1          |    |   |       |
| KLSVEEFFMDLHNFR +3 4.407 0.393 0.9999 2            |    |   |       |
| HLQIDIEGLVDQMIDK +2 5.830 0.457 1.0000 3           |    |   |       |
| TMLETEEGILLVLR +3 3.607 0.198 0.9919 2             |    |   |       |
| AEPHFLSILQHLLVLR +2 5.420 0.658 1.0000 4           |    |   |       |
| SENFSSLLELTLVGNMAGSR +2 5.234 0.693 1.0000 1       |    |   |       |
| LQDLQGEKDALDSEK +2 4.193 0.514 0.9930 2            |    |   |       |

Identified Human Platelet Proteins

| MASCOT:(PepMatched Observed.Hits Coverage) |        | 12         | 2          | 10.92%       |      |     |   |          |         |
|--------------------------------------------|--------|------------|------------|--------------|------|-----|---|----------|---------|
| Seq                                        | Charge | ObservedMS | ExpectedMS | CalculatedMS |      |     |   | PepScore | PepHits |
| FPDELAHVEK                                 | +2     | 592.81     | 1183.61    | 1183.59      | 0.02 | 60  | 3 |          |         |
| EMVSQYLHTSK                                | +2     | 661.83     | 1321.64    | 1321.63      | 0.01 | 48  | 1 |          |         |
| LQDLQGEKDALDSEK                            | +2     | 844.93     | 1687.84    | 1687.83      | 0.01 | 89  | 1 |          | 1       |
| KSEGVTILEEAK                               | +2     | 702.89     | 1403.76    | 1403.75      | 0.01 | 56  | 1 |          |         |
| SAMMYIQELR                                 | +2     | 621.30     | 1240.59    | 1240.59      | 0    | 54  | 3 |          |         |
| ELGDYFVFDPK                                | +2     | 665.32     | 1328.63    | 1328.63      | 0    | 43  | 1 |          |         |
| TAQNLSIFLGSFR                              | +2     | 727.40     | 1452.78    | 1452.77      | 0.01 | 54  | 3 |          |         |
| TMLETEEGILLVLR                             | +3     | 539.64     | 1615.89    | 1615.89      | 0    | 45  | 2 |          |         |
| LSVEEFFMDLHNFR                             | +2     | 892.43     | 1782.84    | 1782.84      | 0    | 100 | 2 |          |         |
| HLQIDIEGLVDQMIDK                           | +2     | 933.99     | 1865.97    | 1865.96      | 0.01 | 112 | 3 |          |         |
| AEPHFLSILQHLLVLR                           | +2     | 943.56     | 1885.10    | 1885.09      | 0.01 | 110 | 4 |          |         |
| KLSVEEFFMDLHNFR                            | +3     | 637.99     | 1910.94    | 1910.93      | 0.01 | 42  | 1 |          |         |

  

| No.                                         | Protein                                                       | Matched (SEQUEST MASCOT) | emPAI      | Strategy.Hits | PepMatched(SEQUEST MASCOT) | SpectraMatched(SEQUEST MASCOT) |   |
|---------------------------------------------|---------------------------------------------------------------|--------------------------|------------|---------------|----------------------------|--------------------------------|---|
| 4.                                          | IPI00231770                                                   | Y                        | Y          | 0.29          | 1                          | 3                              |   |
| *Des:                                       | cAMP-dependent protein kinase type I-alpha regulatory subunit |                          |            |               |                            |                                |   |
| SEQUEST:(PepMatched Observed.Hits Coverage) |                                                               | 3                        | 1          | 14.72%        |                            |                                |   |
| Seq                                         | Charge                                                        | Xcor                     | Delta      | Proability    | PepHits                    |                                |   |
| RSENEEFVEVGR                                | +2                                                            | 3.195                    | 0.234      | 0.9873        | 1                          |                                |   |
| GAISAEVYTEEDAASYVR                          | +2                                                            | 2.841                    | 0.301      | 0.9857        | 1                          |                                |   |
| IVVQGEPGDEFFIILEGTAAVLQR                    | +3                                                            | 5.853                    | 0.476      | 1.0000        | 4                          |                                |   |
| MASCOT:(PepMatched Observed.Hits Coverage)  |                                                               | 4                        | 2          | 17.57%        |                            |                                |   |
| Seq                                         | Charge                                                        | ObservedMS               | ExpectedMS | CalculatedMS  |                            | PepScore PepHits               |   |
| SENEEFVEVGR                                 | +2                                                            | 647.80                   | 1293.58    | 1293.58       | 0                          | 55                             | 2 |
| VSILESLDKWER                                | +2                                                            | 737.90                   | 1473.79    | 1473.78       | 0.01                       | 47                             | 2 |
| LTVADALEPVQFEDGQK                           | +2                                                            | 930.48                   | 1858.94    | 1858.93       | 0.01                       | 89                             | 1 |
| IVVQGEPGDEFFIILEGTAAVLQR                    | +3                                                            | 867.81                   | 2600.40    | 2600.38       | 0.02                       | 62                             | 3 |

  

| No.                                         | Protein        | Matched (SEQUEST MASCOT) | emPAI | Strategy.Hits | PepMatched(SEQUEST MASCOT) | SpectraMatched(SEQUEST MASCOT) |
|---------------------------------------------|----------------|--------------------------|-------|---------------|----------------------------|--------------------------------|
| 5.                                          | IPI00359084    | Y                        | N     | 0.17          | 1                          | 2                              |
| *Des:                                       | 53 kDa protein |                          |       |               |                            |                                |
| SEQUEST:(PepMatched Observed.Hits Coverage) |                | 2                        | 1     | 5.27%         |                            |                                |
| Seq                                         | Charge         | Xcor                     | Delta | Proability    | PepHits                    |                                |
| IASEQHILQR                                  | +2             | 3.170                    | 0.310 | 0.9967        | 1                          |                                |
| VYAALGNHDFHPK                               | +2             | 3.018                    | 0.453 | 0.9990        | 1                          |                                |
| MASCOT:(PepMatched Observed.Hits Coverage)  |                |                          |       |               |                            |                                |

  

| No.                                         | Protein        | Matched (SEQUEST MASCOT) | emPAI | Strategy.Hits | PepMatched(SEQUEST MASCOT) | SpectraMatched(SEQUEST MASCOT) |
|---------------------------------------------|----------------|--------------------------|-------|---------------|----------------------------|--------------------------------|
| 6.                                          | IPI00192302    | Y                        | Y     | 0.38          | 4                          | 7                              |
| *Des:                                       | 99 kDa protein |                          |       |               |                            |                                |
| SEQUEST:(PepMatched Observed.Hits Coverage) |                | 7                        | 5     | 14.76%        |                            |                                |
| Seq                                         | Charge         | Xcor                     | Delta | Proability    | PepHits                    |                                |
| NSYPHFYDGEIVVAGR                            | +3             | 3.850                    | 0.403 | 0.9999        | 1                          |                                |
| EQGYIFGDYIER                                | +2             | 2.719                    | 0.444 | 0.9983        | 1                          |                                |
| SLPEGVVDGIEIYSTK                            | +2             | 4.505                    | 0.607 | 1.0000        | 1                          |                                |

Identified Human Platelet Proteins

| Protein                                    | Matched (SEQUENT MASCOT) | emPAI      | Strategy.Hits | PepMatched(SEQUENT MASCOT) | SpectraMatched(SEQUENT MASCOT) |
|--------------------------------------------|--------------------------|------------|---------------|----------------------------|--------------------------------|
| VIFELTYEELLK                               | +2                       | 4.071      | 0.372         | 0.9995                     | 1                              |
| ESPGNVQIVNGYFVHFFAPQGLPVVPK                | +3                       | 4.799      | 0.636         | 1.0000                     | 2                              |
| FPLYNLGFGNNLNYNFLESLALENHGFAR              | +3                       | 7.288      | 0.560         | 1.0000                     | 1                              |
| LWAYLTIEQLLEK                              | +2                       | 4.988      | 0.504         | 1.0000                     | 2                              |
| MASCOT:(PepMatched Observed.Hits Coverage) |                          | 6          | 6             | 11.32%                     |                                |
| Seq                                        | Charge                   | ObservedMS | ExpectedMS    | CalculatedMS               | PepScore PepHits               |
| NSYPHFYDYGSEIVVAGR                         | +3                       | 637.64     | 1909.90       | 1909.90                    | 0 41                           |
| SLPEGVVDGIEIYSTK                           | +2                       | 853.95     | 1705.89       | 1705.88                    | 0.01 76                        |
| VIFELTYEELLK                               | +2                       | 748.92     | 1495.83       | 1495.82                    | 0.01 65 2                      |
| LWAYLTIEQLLEK                              | +2                       | 810.46     | 1618.90       | 1618.90                    | 0 74 2                         |
| ESPGNVQIVNGYFVHFFAPQGLPVVPK                | +3                       | 980.86     | 2939.55       | 2939.53                    | 0.02 72 4                      |
| SMTNINDGLLR                                | +2                       | 617.31     | 1232.61       | 1232.62                    | 0 46 4                         |

No. 7. Protein IPI00372792 Matched (SEQUENT MASCOT) Y Y emPAI 0.32 Strategy.Hits 1 PepMatched(SEQUENT MASCOT) 2 SpectraMatched(SEQUENT MASCOT) 5

\*Des: Serine

| Protein                                     | Matched (SEQUENT MASCOT) | emPAI      | Strategy.Hits | PepMatched(SEQUENT MASCOT) | SpectraMatched(SEQUENT MASCOT) |
|---------------------------------------------|--------------------------|------------|---------------|----------------------------|--------------------------------|
| SEQUEST:(PepMatched Observed.Hits Coverage) |                          | 2          | 1             | 9.55%                      |                                |
| Seq                                         | Charge                   | Xcor       | Delta         | Probability                | PepHits                        |
| NLLIFEVQQPFLFLLWDQR                         | +3                       | 5.013      | 0.468         | 1.0000                     | 1                              |
| AETNMAFSPFSIASLLTQVLLGAGDSTK                | +2                       | 5.380      | 0.669         | 1.0000                     | 2                              |
| MASCOT:(PepMatched Observed.Hits Coverage)  |                          | 5          | 2             | 16.17%                     |                                |
| Seq                                         | Charge                   | ObservedMS | ExpectedMS    | CalculatedMS               | PepScore PepHits               |
| INELLDSLPSDTR                               | +2                       | 736.89     | 1471.76       | 1471.75                    | 0.01 71 1                      |
| LVLLNAVYLSAK                                | +2                       | 652.40     | 1302.79       | 1302.79                    | 0 60 1                         |
| DSSEATLSEALTDFSVK                           | +2                       | 900.43     | 1798.84       | 1798.85                    | 0 41 1                         |
| GVTSVSQIFHSPDLAIR                           | +2                       | 913.99     | 1825.97       | 1825.97                    | 0 64 3                         |
| NLLIFEVQQPFLFLLWDQR                         | +3                       | 807.11     | 2418.32       | 2418.31                    | 0.01 49 2                      |

No. 8. Protein IPI00362160 Matched (SEQUENT MASCOT) N Y emPAI 0.26 Strategy.Hits 2 PepMatched(SEQUENT MASCOT) 0 SpectraMatched(SEQUENT MASCOT) 44

\*Des: PREDICTED: tubulin, beta 3

| Protein                                     | Matched (SEQUENT MASCOT) | emPAI      | Strategy.Hits | PepMatched(SEQUENT MASCOT) | SpectraMatched(SEQUENT MASCOT) |
|---------------------------------------------|--------------------------|------------|---------------|----------------------------|--------------------------------|
| SEQUEST:(PepMatched Observed.Hits Coverage) |                          | 4          | 2             | 13.31%                     |                                |
| MASCOT:(PepMatched Observed.Hits Coverage)  |                          | 4          | 2             | 13.31%                     |                                |
| Seq                                         | Charge                   | ObservedMS | ExpectedMS    | CalculatedMS               | PepScore PepHits               |
| IMNTFSVVPSPK                                | +2                       | 660.4000   | 1318.7854     | 1318.6955                  | 0.09 54 1                      |
| MSSTFIGNSTAIQELFK                           | +2                       | 937.5349   | 1873.0552     | 1872.9291                  | 0.13 61 2                      |
| FPGQLNADLR                                  | +2                       | 565.8393   | 1129.6640     | 1129.5880                  | 0.08 77 76                     |
| GHYTEGAELVDSVLDVVR                          | +2                       | 980.0594   | 1958.1042     | 1957.9744                  | 0.13 58 16                     |

No. 9. Protein IPI00191502 Matched (SEQUENT MASCOT) Y Y emPAI 1.46 Strategy.Hits 1 PepMatched(SEQUENT MASCOT) 4 SpectraMatched(SEQUENT MASCOT) 4

\*Des: Proteasome subunit alpha type 5

| Protein                                     | Matched (SEQUENT MASCOT) | emPAI | Strategy.Hits | PepMatched(SEQUENT MASCOT) | SpectraMatched(SEQUENT MASCOT) |
|---------------------------------------------|--------------------------|-------|---------------|----------------------------|--------------------------------|
| SEQUEST:(PepMatched Observed.Hits Coverage) |                          | 4     | 1             | 28.04%                     |                                |
| Seq                                         | Charge                   | Xcor  | Delta         | Probability                | PepHits                        |
| PFGVALLFGGVDEK                              | +2                       | 4.385 | 0.606         | 1.0000                     | 2                              |
| GVNTFSPEGR                                  | +2                       | 2.790 | 0.245         | 0.9845                     | 2                              |
| AIGSASEGAQSSLQEVYHK                         | +2                       | 4.539 | 0.608         | 1.0000                     | 4                              |

Identified Human Platelet Proteins

| L NATNIELATVQPGQNFHMFTK                    |        | +3         | 3.146      | 0.372        | 0.9987 | 1                |   |  |
|--------------------------------------------|--------|------------|------------|--------------|--------|------------------|---|--|
| MASCOT:(PepMatched Observed.Hits Coverage) |        | 3          | 1          | 21.95%       |        |                  |   |  |
| Seq                                        | Charge | ObservedMS | ExpectedMS | CalculatedMS |        | Pepscore PepHits |   |  |
| GVNTFSPEGR                                 | +2     | 532.26     | 1062.51    | 1062.51      | 0      | 41               | 2 |  |
| AIGSASEGAQSSLQEVYHK                        | +2     | 981.49     | 1960.97    | 1960.95      | 0.02   | 100              | 5 |  |
| L NATNIELATVQPGQNFHMFTK                    | +3     | 825.43     | 2473.26    | 2473.24      | 0.02   | 56               | 1 |  |

No. 10. Protein IPI00190701 Matched (SEQUEST MASCOT) Y Y emPAI Strategy.Hits 2.16 4 PepMatched(SEQUEST MASCOT) 14 14 SpectraMatched(SEQUEST MASCOT) 35 79

\*Des: Apolipoprotein E precursor

| SEQUEST:(PepMatched Observed.Hits Coverage) |        | 14         | 8          | 45.59%       |         |                  |    |  |
|---------------------------------------------|--------|------------|------------|--------------|---------|------------------|----|--|
| Seq                                         | Charge | Xcor       | Delta      | Proability   | PepHits |                  |    |  |
| MEEQTQQIR                                   | +2     | 3.689      | 0.313      | 0.9990       | 4       |                  |    |  |
| GRLEEVGNQAR                                 | +2     | 3.633      | 0.420      | 0.9982       | 8       |                  |    |  |
| IQASVATNSIASTTVPLENQ                        | +2     | 3.819      | 0.506      | 1.0000       | 1       |                  |    |  |
| GWFEPLVEDMQR                                | +2     | 3.164      | 0.399      | 0.9986       | 3       |                  |    |  |
| LGADMEDLR                                   | +2     | 3.426      | 0.371      | 0.9993       | 4       |                  |    |  |
| ELEEQLGPVAEETR                              | +2     | 4.623      | 0.480      | 1.0000       | 2       |                  |    |  |
| IQASVATNSIASTTVPLEN                         | +2     | 3.299      | 0.478      | 0.9920       | 1       |                  |    |  |
| NEVNTMLGQSTEELR                             | +2     | 4.614      | 0.592      | 1.0000       | 2       |                  |    |  |
| IKGWFEPLVEDMQR                              | +2     | 4.237      | 0.518      | 1.0000       | 4       |                  |    |  |
| SKMEEQTQQIR                                 | +2     | 3.681      | 0.472      | 1.0000       | 3       |                  |    |  |
| DRLEEVREQMEEVR                              | +2     | 3.552      | 0.459      | 0.9980       | 3       |                  |    |  |
| LGQYRNEVNTMLGQSTEELR                        | +3     | 4.413      | 0.506      | 1.0000       | 1       |                  |    |  |
| TANLGAGAAQPLR                               | +2     | 3.605      | 0.443      | 0.9996       | 6       |                  |    |  |
| LGPLVEQGR                                   | +2     | 3.494      | 0.453      | 1.0000       | 10      |                  |    |  |
| MASCOT:(PepMatched Observed.Hits Coverage)  |        | 14         | 10         | 38.99%       |         |                  |    |  |
| Seq                                         | Charge | ObservedMS | ExpectedMS | CalculatedMS |         | Pepscore PepHits |    |  |
| EVQAAQAR                                    | +2     | 436.7358   | 871.4570   | 871.4511     | 0.01    | 68               | 4  |  |
| DADDLQKR                                    | +2     | 480.7439   | 959.4733   | 959.4672     | 0.01    | 51               | 2  |  |
| GWFEPLVEDMQR                                | +2     | 753.8603   | 1505.7060  | 1505.6972    | 0.01    | 47               | 4  |  |
| LEEVGNQAR                                   | +2     | 508.2668   | 1014.5191  | 1014.5094    | 0.01    | 47               | 4  |  |
| MEEQTQQIR                                   | +2     | 581.7835   | 1161.5525  | 1161.5448    | 0.01    | 59               | 12 |  |
| LGADMEDLR                                   | +2     | 510.2483   | 1018.4820  | 1018.4753    | 0.01    | 86               | 12 |  |
| ELEEQLGPVAEETR                              | +2     | 800.4036   | 1598.7926  | 1598.7787    | 0.01    | 62               | 8  |  |
| GRLEEVGNQAR                                 | +2     | 614.8276   | 1227.6407  | 1227.6319    | 0.01    | 59               | 12 |  |
| NEVNTMLGQSTEELR                             | +2     | 860.9189   | 1719.8233  | 1719.8097    | 0.01    | 97               | 8  |  |
| IKGWFEPLVEDMQR                              | +2     | 874.4535   | 1746.8924  | 1746.8763    | 0.02    | 72               | 8  |  |
| SKMEEQTQQIR                                 | +2     | 689.3481   | 1376.6817  | 1376.6718    | 0.01    | 71               | 6  |  |
| TANLGAGAAQPLR                               | +2     | 620.3486   | 1238.6827  | 1238.6731    | 0.01    | 71               | 6  |  |
| LGPLVEQGR                                   | +2     | 484.7828   | 967.5511   | 967.5450     | 0.01    | 58               | 11 |  |
| TANLGAGAAQPLRDR                             | +3     | 504.2769   | 1509.8090  | 1509.8011    | 0.01    | 61               | 6  |  |

No. 11. Protein IPI00363974 Matched (SEQUEST MASCOT) Y Y emPAI Strategy.Hits 0.81 4 PepMatched(SEQUEST MASCOT) 20 16 SpectraMatched(SEQUEST MASCOT) 45 41

\*Des: Gelsolin

| SEQUEST:(PepMatched Observed.Hits Coverage) |  | 20 | 12 | 39.11% |  |  |  |  |
|---------------------------------------------|--|----|----|--------|--|--|--|--|
|---------------------------------------------|--|----|----|--------|--|--|--|--|

Identified Human Platelet Proteins

| Seq                                        | Charge                                                | Xcor                     | Delta      | Proability    | PepHits                    |                                |         |   |   |
|--------------------------------------------|-------------------------------------------------------|--------------------------|------------|---------------|----------------------------|--------------------------------|---------|---|---|
| DGGQTPASTR                                 | +2                                                    |                          | 3.442      | 0.407         | 0.9993                     | 5                              |         |   |   |
| AGALNSNDAFVLK                              | +2                                                    |                          | 3.750      | 0.571         | 1.0000                     | 5                              |         |   |   |
| EVQGFESSTFQGYFK                            | +2                                                    |                          | 4.579      | 0.620         | 1.0000                     | 7                              |         |   |   |
| VNSGGSMSVSLVADENPFAQSALR                   | +3                                                    |                          | 5.736      | 0.461         | 1.0000                     | 4                              |         |   |   |
| DSQEEEEKTEALTSAK                           | +2                                                    |                          | 4.512      | 0.531         | 1.0000                     | 2                              |         |   |   |
| TPSAAYLWVGTGASDAEKTGALELLK                 | +3                                                    |                          | 4.788      | 0.584         | 1.0000                     | 1                              |         |   |   |
| VEKFDLVPVPPNLYGDFFTGDAYVILK                | +3                                                    |                          | 3.951      | 0.485         | 0.9998                     | 1                              |         |   |   |
| GGTSRDGGQTPASTR                            | +3                                                    |                          | 3.386      | 0.252         | 0.9865                     | 1                              |         |   |   |
| DSQEEEEKTEALTSAKR                          | +3                                                    |                          | 4.356      | 0.496         | 1.0000                     | 1                              |         |   |   |
| AALKTASDFISK                               | +3                                                    |                          | 3.390      | 0.320         | 0.9991                     | 4                              |         |   |   |
| VPFDAATLHTSTAMAAQHGMDDDG TGQK              | +3                                                    |                          | 6.460      | 0.620         | 1.0000                     | 4                              |         |   |   |
| SEDCFILDHGR                                | +2                                                    |                          | 2.959      | 0.504         | 0.9996                     | 2                              |         |   |   |
| QTQVSVLPEGGETPLFK                          | +2                                                    |                          | 4.013      | 0.516         | 1.0000                     | 3                              |         |   |   |
| AQHVQVEEGSEPDGFWEALGGK                     | +2                                                    |                          | 6.459      | 0.587         | 1.0000                     | 4                              |         |   |   |
| KG VASGFK                                  | +2                                                    |                          | 2.689      | 0.335         | 0.9950                     | 9                              |         |   |   |
| HVVPNEVVVQR                                | +2                                                    |                          | 3.061      | 0.531         | 0.9998                     | 21                             |         |   |   |
| VSETRPSTMVVEHPEFLK                         | +3                                                    |                          | 4.017      | 0.310         | 0.9997                     | 2                              |         |   |   |
| RTPITVVR                                   | +2                                                    |                          | 2.837      | 0.231         | 0.9880                     | 9                              |         |   |   |
| AGKEPGLQIWR                                | +3                                                    |                          | 3.967      | 0.324         | 0.9999                     | 15                             |         |   |   |
| KMDAHPPR                                   | +2                                                    |                          | 2.740      | 0.340         | 0.9968                     | 16                             |         |   |   |
| MASCOT:(PepMatched Observed.Hits Coverage) |                                                       |                          |            |               | 9                          | 21.63%                         |         |   |   |
| Seq                                        | Charge                                                | ObservedMS               | ExpectedMS | CalculatedMS  |                            | Pepscore                       | PepHits |   |   |
| DGGQTPASTR                                 | +2                                                    | 545.7634                 | 1089.5123  | 1089.5051     | 0.01                       | 55                             | 4       |   |   |
| DSQEEEEKTEALTSAK                           | +2                                                    | 833.4040                 | 1664.7934  | 1664.7740     | 0.02                       | 76                             | 4       |   |   |
| TASDFISK                                   | +2                                                    | 434.7271                 | 867.4397   | 867.4338      | 0.01                       | 50                             | 5       |   |   |
| AGALNSNDAFVLK                              | +2                                                    | 660.3582                 | 1318.7019  | 1318.6880     | 0.01                       | 57                             | 5       |   |   |
| EVQGFESSTFQGYFK                            | +2                                                    | 877.4142                 | 1752.8138  | 1752.7994     | 0.01                       | 88                             | 8       |   |   |
| TGALELLK                                   | +2                                                    | 423.2472                 | 844.4798   | 843.5065      | 0.97                       | 46                             | 3       |   |   |
| SEDCFILDHGR                                | +2                                                    | 646.2953                 | 1290.5761  | 1290.5663     | 0.01                       | 59                             | 1       |   |   |
| QTQVSVLPEGGETPLFK                          | +2                                                    | 915.4914                 | 1828.9682  | 1828.9570     | 0.01                       | 58                             | 3       |   |   |
| LKATQVSK                                   | +2                                                    | 437.7749                 | 873.5353   | 873.5283      | 0.01                       | 63                             | 4       |   |   |
| KG VASGFK                                  | +2                                                    | 426.4628                 | 850.9110   | 849.4708      | 1.44                       | 63                             | 9       |   |   |
| DSQEEEEKTEALTSAKR                          | +3                                                    | 607.9705                 | 1820.8897  | 1820.8752     | 0.01                       | 56                             | 1       |   |   |
| AALKTASDFISK                               | +2                                                    | 626.3539                 | 1250.6933  | 1250.6870     | 0.01                       | 41                             | 2       |   |   |
| HVVPNEVVVQR                                | +2                                                    | 638.3660                 | 1274.7174  | 1274.7095     | 0.01                       | 64                             | 10      |   |   |
| AGKEPGLQIWR                                | +3                                                    | 418.9058                 | 1253.6955  | 1253.6880     | 0.01                       | 46                             | 7       |   |   |
| RTPITVVR                                   | +2                                                    | 471.3008                 | 940.5870   | 940.5818      | 0.01                       | 41                             | 4       |   |   |
| KMDAHPPR                                   | +2                                                    | 476.2481                 | 950.4817   | 950.4756      | 0.01                       | 44                             | 13      |   |   |
| No.                                        | Protein                                               | Matched (SEQUEST MASCOT) | emPAI      | Strategy.Hits | PepMatched(SEQUEST MASCOT) | SpectraMatched(SEQUEST MASCOT) |         |   |   |
| 12.                                        | IPI00372796                                           | Y                        | Y          | 0.33          | 1                          | 3                              | 2       | 4 | 2 |
| *Des:                                      | PREDICTED: similar to mitochondrial carrier homolog 2 |                          |            |               |                            |                                |         |   |   |
|                                            | SEQUEST:(PepMatched Observed.Hits Coverage)           |                          |            |               |                            |                                |         |   |   |
|                                            | Seq                                                   | Charge                   | Xcor       | Delta         | Proability                 | PepHits                        |         |   |   |
|                                            | SAATLITHPFHVITLR                                      | +2                       |            | 3.434         | 0.417                      | 0.9984                         | 2       |   |   |
|                                            | VLIQVGYEPLPPTIGR                                      | +2                       |            | 3.506         | 0.481                      | 0.9994                         | 1       |   |   |

| Identified Human Platelet Proteins |                                                  |                                     |            |               |                            |                                |     |          |         |
|------------------------------------|--------------------------------------------------|-------------------------------------|------------|---------------|----------------------------|--------------------------------|-----|----------|---------|
|                                    | EEGIVGFFAGLIPR                                   | +3                                  | 3.075      | 0.442         | 0.9993                     | 2                              |     |          |         |
| MASCOT:                            | (PepMatched Observed.Hits Coverage)              |                                     |            | 2             | 1                          | 6.4%                           |     |          |         |
|                                    | Seq                                              | Charge                              | ObservedMS | ExpectedMS    | CalculatedMS               |                                |     | PepScore | PepHits |
|                                    | VLIQVGYEPLPPTIGR                                 | +2                                  | 876.51     | 1751.00       | 1751.00                    | 0                              | 52  | 1        |         |
|                                    | SAATLITHPFHVITLR                                 | +2                                  | 889.01     | 1776.01       | 1776.00                    | 0.01                           | 43  | 2        |         |
| No.                                | Protein                                          | Matched (SEQUEST MASCOT)            | emPAI      | Strategy.Hits | PepMatched(SEQUEST MASCOT) | SpectraMatched(SEQUEST MASCOT) |     |          |         |
| 13.                                | IPI00363976                                      | Y                                   | Y          | 1.3           | 4                          | 6                              | 6   | 21       | 30      |
| *Des:                              | Stomatin                                         |                                     |            |               |                            |                                |     |          |         |
|                                    | SEQUEST:                                         | (PepMatched Observed.Hits Coverage) |            | 6             | 7                          | 30.1%                          |     |          |         |
|                                    | Seq                                              | Charge                              | Xcor       | Delta         | Probility                  | PepHits                        |     |          |         |
|                                    | VIAAEGEMNASR                                     | +2                                  | 4.192      | 0.637         | 1.0000                     | 3                              |     |          |         |
|                                    | LLAQTTLR                                         | +2                                  | 2.825      | 0.206         | 0.9850                     | 9                              |     |          |         |
|                                    | VQNATLAVANITNADSATR                              | +2                                  | 6.514      | 0.630         | 1.0000                     | 4                              |     |          |         |
|                                    | YLQTLTTIAAEK                                     | +2                                  | 4.130      | 0.422         | 0.9999                     | 2                              |     |          |         |
|                                    | EASMVITESPAALQLR                                 | +2                                  | 4.331      | 0.382         | 0.9998                     | 2                              |     |          |         |
|                                    | TISFDIPPQEVLTk                                   | +2                                  | 3.435      | 0.425         | 0.9997                     | 6                              |     |          |         |
|                                    | MASCOT:                                          | (PepMatched Observed.Hits Coverage) |            | 6             | 4                          | 29.75%                         |     |          |         |
|                                    | Seq                                              | Charge                              | ObservedMS | ExpectedMS    | CalculatedMS               |                                |     | PepScore | PepHits |
|                                    | AMAAEAEAAR                                       | +2                                  | 495.7462   | 989.4779      | 989.4600                   | 0.02                           | 54  | 14       |         |
|                                    | VIAAEGEMNASR                                     | +2                                  | 624.3132   | 1246.6119     | 1246.5975                  | 0.01                           | 67  | 7        |         |
|                                    | YLQTLTTIAAEK                                     | +2                                  | 676.3815   | 1350.7484     | 1350.7395                  | 0.01                           | 43  | 2        |         |
|                                    | VQNATLAVANITNADSATR                              | +2                                  | 965.5125   | 1929.0105     | 1928.9915                  | 0.02                           | 137 | 5        |         |
|                                    | LLAQTTLR                                         | +2                                  | 459.2699   | 916.5252      | 914.5549                   | 1.97                           | 52  | 12       |         |
|                                    | ALKEASMVITESPAALQLR                              | +3                                  | 677.0509   | 2028.1309     | 2027.1084                  | 1.02                           | 48  | 2        |         |
| No.                                | Protein                                          | Matched (SEQUEST MASCOT)            | emPAI      | Strategy.Hits | PepMatched(SEQUEST MASCOT) | SpectraMatched(SEQUEST MASCOT) |     |          |         |
| 14.                                | IPI00205036                                      | Y                                   | Y          | 1.54          | 4                          | 5                              | 5   | 27       | 40      |
| *Des:                              | Alpha-2-globin chain                             |                                     |            |               |                            |                                |     |          |         |
|                                    | SEQUEST:                                         | (PepMatched Observed.Hits Coverage) |            | 5             | 5                          | 48.96%                         |     |          |         |
|                                    | Seq                                              | Charge                              | Xcor       | Delta         | Probility                  | PepHits                        |     |          |         |
|                                    | IGGHGGEYGEEALQR                                  | +2                                  | 4.392      | 0.557         | 1.0000                     | 14                             |     |          |         |
|                                    | FLASVSTVLTSK                                     | +2                                  | 3.055      | 0.482         | 0.9999                     | 7                              |     |          |         |
|                                    | TYFSHIDVSPGSAQVK                                 | +2                                  | 5.139      | 0.640         | 1.0000                     | 17                             |     |          |         |
|                                    | AADHVEDLPGALSTLSDLHAHKLR                         | +3                                  | 3.992      | 0.457         | 1.0000                     | 3                              |     |          |         |
|                                    | AADHVEDLPGALSTLSDLHAHK                           | +3                                  | 3.904      | 0.494         | 1.0000                     | 2                              |     |          |         |
|                                    | MASCOT:                                          | (PepMatched Observed.Hits Coverage) |            | 5             | 4                          | 54.48%                         |     |          |         |
|                                    | Seq                                              | Charge                              | ObservedMS | ExpectedMS    | CalculatedMS               |                                |     | PepScore | PepHits |
|                                    | MFAAFPTTK                                        | +2                                  | 507.2886   | 1012.5626     | 1012.5052                  | 0.06                           | 41  | 6        |         |
|                                    | FLASVSTVLTSK                                     | +2                                  | 626.9042   | 1251.7938     | 1251.7074                  | 0.09                           | 66  | 2        |         |
|                                    | IGGHGGEYGEEALQR                                  | +3                                  | 524.9478   | 1571.8216     | 1571.7327                  | 0.09                           | 58  | 6        |         |
|                                    | TYFSHIDVSPGSAQVK                                 | +2                                  | 868.4940   | 1734.9734     | 1734.8577                  | 0.12                           | 58  | 10       |         |
|                                    | AADHVEDLPGALSTLSDLHAHK                           | +4                                  | 575.0763   | 2296.2761     | 2296.1447                  | 0.13                           | 40  | 2        |         |
| No.                                | Protein                                          | Matched (SEQUEST MASCOT)            | emPAI      | Strategy.Hits | PepMatched(SEQUEST MASCOT) | SpectraMatched(SEQUEST MASCOT) |     |          |         |
| 15.                                | IPI00191366                                      | Y                                   | Y          | 0.24          | 1                          | 2                              | 2   | 3        | 2       |
| *Des:                              | Megakaryocyte-associated tyrosine-protein kinase |                                     |            |               |                            |                                |     |          |         |

Identified Human Platelet Proteins

| No.   | Protein                                               | Matched (SEQUEST MASCOT) | emPAI      | Strategy.Hits | PepMatched(SEQUEST MASCOT) | SpectraMatched(SEQUEST MASCOT) |     |   |          |         |
|-------|-------------------------------------------------------|--------------------------|------------|---------------|----------------------------|--------------------------------|-----|---|----------|---------|
| 16.   | IPI00554303                                           | N                        | Y          | 0.08          | 1                          | 0                              | 5   | 0 | 13       |         |
| *Des: | PREDICTED: hypothetical protein XP_579477             |                          |            |               |                            |                                |     |   |          |         |
|       | SEQUEST:(PepMatched Observed.Hits Coverage) 2 1 9.89% |                          |            |               |                            |                                |     |   |          |         |
|       | Seq                                                   | Charge                   | Xcor       | Delta         | Probability                | PepHits                        |     |   |          |         |
|       | SVGVAAPAGGQEAEGSAPTR                                  | +2                       |            | 4.158         | 0.569                      | 1.0000                         | 1   |   |          |         |
|       | ALVSTSQLLQFALHVAEGMEYLESK                             | +3                       |            | 5.004         | 0.566                      | 1.0000                         | 2   |   |          |         |
|       | MASCOT:(PepMatched Observed.Hits Coverage) 2 1 9.89%  |                          |            |               |                            |                                |     |   |          |         |
|       | Seq                                                   | Charge                   | ObservedMS | ExpectedMS    | CalculatedMS               |                                |     |   | Pepscore | PepHits |
|       | SVGVAAPAGGQEAEGSAPTR                                  | +2                       | 906.45     | 1810.89       | 1810.88                    | 0.01                           | 71  |   | 1        |         |
|       | ALVSTSQLLQFALHVAEGMEYLESK                             | +3                       | 922.15     | 2763.42       | 2763.42                    | 0                              | 64  |   | 2        |         |
| 17.   | IPI00565738                                           | N                        | Y          | 0.25          | 1                          | 0                              | 7   | 0 | 58       |         |
| *Des: | Phosphoglycerate kinase 1                             |                          |            |               |                            |                                |     |   |          |         |
|       | SEQUEST:(PepMatched Observed.Hits Coverage) 5 1 5.62% |                          |            |               |                            |                                |     |   |          |         |
|       | MASCOT:(PepMatched Observed.Hits Coverage) 7 1 27.35% |                          |            |               |                            |                                |     |   |          |         |
|       | Seq                                                   | Charge                   | ObservedMS | ExpectedMS    | CalculatedMS               |                                |     |   | Pepscore | PepHits |
|       | TPLVTIQSSGSFSQK                                       | +2                       | 790.42     | 1578.83       | 1578.83                    | 0                              | 102 |   | 1        |         |
|       | GGEFEMMPLGVNK                                         | +2                       | 704.83     | 1407.65       | 1407.65                    | 0                              | 61  |   | 2        |         |
|       | DMGLTAFTNLK                                           | +2                       | 605.81     | 1209.60       | 1209.61                    | 0                              | 63  |   | 5        |         |
|       | MLIYTILPDGEVIADSVTFQVEK                               | +3                       | 861.13     | 2580.36       | 2580.34                    | 0.02                           | 51  |   | 2        |         |
|       | NLHPLNELFPLAYIEDPK                                    | +3                       | 708.38     | 2122.12       | 2122.11                    | 0.01                           | 41  |   | 7        |         |
| 18.   | IPI00337168                                           | Y                        | Y          | 0.23          | 2                          | 2                              | 3   | 6 | 8        |         |
| *Des: | T-complex protein 1, delta subunit                    |                          |            |               |                            |                                |     |   |          |         |
|       | SEQUEST:(PepMatched Observed.Hits Coverage) 2 2 4.02% |                          |            |               |                            |                                |     |   |          |         |
|       | Seq                                                   | Charge                   | Xcor       | Delta         | Probability                | PepHits                        |     |   |          |         |
|       | IDDVVNT                                               | +2                       | 3.029      | 0.380         | 0.9888                     | 1                              |     |   |          |         |
|       | VIDPATATSVDLR                                         | +2                       | 3.829      | 0.532         | 1.0000                     | 2                              |     |   |          |         |
|       | MASCOT:(PepMatched Observed.Hits Coverage) 3 1 7.31%  |                          |            |               |                            |                                |     |   |          |         |
|       | Seq                                                   | Charge                   | ObservedMS | ExpectedMS    | CalculatedMS               |                                |     |   | Pepscore | PepHits |
|       | VIDPATATSVDLR                                         | +2                       | 679.3769   | 1356.7392     | 1356.7249                  | 0.01                           | 45  |   | 2        |         |
|       | GIHPTIISESFQK                                         | +3                       | 486.2693   | 1455.7862     | 1455.7721                  | 0.01                           | 41  |   | 2        |         |
|       | SGPPAAGPGNR                                           | +2                       | 490.7530   | 979.4914      | 979.4835                   | 0.01                           | 52  |   | 13       |         |

**Identified Human Platelet Proteins**

| No.   | Protein                                                     | Matched (SEQUEST MASCOT) | emPAI      | Strategy.Hits | PepMatched(SEQUEST MASCOT) | SpectraMatched(SEQUEST MASCOT) |          |         |    |
|-------|-------------------------------------------------------------|--------------------------|------------|---------------|----------------------------|--------------------------------|----------|---------|----|
| 19.   | IPI00393058                                                 | Y                        | Y          | 0.61          | 3                          | 6                              | 5        | 13      | 16 |
| *Des: | 43 kDa protein                                              |                          |            |               |                            |                                |          |         |    |
|       | SEQUEST:(PepMatched Observed.Hits Coverage)                 |                          |            |               | 6                          | 4                              | 21.21%   |         |    |
|       | Seq                                                         | Charge                   | Xcor       | Delta         | Proability                 | PepHits                        |          |         |    |
|       | GGSLNNGDPPDLQLK                                             |                          |            | +2            | 4.240                      | 0.415                          | 0.9997   | 4       |    |
|       | IVEENALAPDFSK                                               | +2                       |            | 3.056         | 0.355                      | 0.9961                         | 1        |         |    |
|       | LVSDSLANIVKPQK                                              | +2                       |            | 3.953         | 0.439                      | 0.9997                         | 1        |         |    |
|       | YPPVTTFSGYLLYR                                              | +2                       |            | 2.833         | 0.403                      | 0.9955                         | 1        |         |    |
|       | IPYLGVIYFK                                                  | +2                       |            | 3.081         | 0.475                      | 0.9997                         | 1        |         |    |
|       | SLTELVESIVEMK                                               | +2                       |            | 3.883         | 0.497                      | 0.9999                         | 3        |         |    |
|       | MASCOT:(PepMatched Observed.Hits Coverage)                  |                          |            |               | 5                          | 4                              | 17.42%   |         |    |
|       | Seq                                                         | Charge                   | ObservedMS | ExpectedMS    | CalculatedMS               |                                | Pepscore | PepHits |    |
|       | GGSLNNGDPPDLQLK                                             |                          | +2         | 700.86        | 1399.70                    | 1399.69                        | 0.01     | 73      | 4  |
|       | IVEENALAPDFSK                                               | +2                       |            | 716.87        | 1431.73                    | 1431.72                        | 0.01     | 55      | 1  |
|       | LVSDSLANIVKPQK                                              | +2                       |            | 756.44        | 1510.87                    | 1510.87                        | 0        | 81      | 3  |
|       | IPYLGVIYFK                                                  | +2                       |            | 606.86        | 1211.70                    | 1211.70                        | 0        | 43      | 1  |
|       | SLTELVESIVEMK                                               | +2                       |            | 739.39        | 1476.77                    | 1476.77                        | 0        | 76      | 4  |
| 20.   | IPI00368053                                                 | Y                        | Y          | 0.31          | 1                          | 3                              | 2        | 4       | 2  |
| *Des: | Hypothetical LOC363644                                      |                          |            |               |                            |                                |          |         |    |
|       | SEQUEST:(PepMatched Observed.Hits Coverage)                 |                          |            |               | 3                          | 1                              | 15.84%   |         |    |
|       | Seq                                                         | Charge                   | Xcor       | Delta         | Proability                 | PepHits                        |          |         |    |
|       | VTLAVSDLQK                                                  |                          | +2         | 2.923         | 0.302                      | 0.9913                         | 1        |         |    |
|       | VAEGVFETEAPGGYK                                             |                          | +2         | 3.342         | 0.418                      | 0.9982                         | 1        |         |    |
|       | LGNDFMGLTLASSQAVSNAR                                        | +2                       |            | 4.502         | 0.606                      | 1.0000                         | 2        |         |    |
|       | MASCOT:(PepMatched Observed.Hits Coverage)                  |                          |            |               | 2                          | 1                              | 12.21%   |         |    |
|       | Seq                                                         | Charge                   | ObservedMS | ExpectedMS    | CalculatedMS               |                                | Pepscore | PepHits |    |
|       | VAEGVFETEAPGGYK                                             | +2                       |            | 777.38        | 1552.74                    | 1552.74                        | 0        | 50      | 1  |
|       | LGNDFMGLTLASSQAVSNAR                                        | +3                       |            | 684.67        | 2051.00                    | 2051.01                        | 0        | 56      | 1  |
| 21.   | IPI00471645                                                 | Y                        | Y          | 0.43          | 1                          | 3                              | 2        | 4       | 4  |
| *Des: | Dolichyl-di-phosphooligosaccharide-protein glycotransferase |                          |            |               |                            |                                |          |         |    |
|       | SEQUEST:(PepMatched Observed.Hits Coverage)                 |                          |            |               | 3                          | 1                              | 8.9%     |         |    |
|       | Seq                                                         | Charge                   | Xcor       | Delta         | Proability                 | PepHits                        |          |         |    |
|       | NLLIAGLQAR                                                  | +2                       |            | 3.516         | 0.350                      | 0.9992                         | 1        |         |    |
|       | LPDVYGVFQFK                                                 | +2                       |            | 3.304         | 0.500                      | 0.9999                         | 2        |         |    |
|       | WVPFDGDDIQLEFVR                                             | +2                       |            | 3.392         | 0.367                      | 0.9983                         | 2        |         |    |
|       | MASCOT:(PepMatched Observed.Hits Coverage)                  |                          |            |               | 2                          | 1                              | 5.34%    |         |    |
|       | Seq                                                         | Charge                   | ObservedMS | ExpectedMS    | CalculatedMS               |                                | Pepscore | PepHits |    |
|       | NLLIAGLQAR                                                  | +2                       |            | 585.36        | 1168.70                    | 1168.69                        | 0.01     | 52      | 2  |
|       | LPDVYGVFQFK                                                 | +2                       |            | 656.85        | 1311.69                    | 1311.69                        | 0        | 48      | 4  |
| No.   | Protein                                                     | Matched (SEQUEST MASCOT) | emPAI      | Strategy.Hits | PepMatched(SEQUEST MASCOT) | SpectraMatched(SEQUEST MASCOT) |          |         |    |



| Identified Human Platelet Proteins |                                                                                            |                          |            |               |                            |                                |          |         |    |  |
|------------------------------------|--------------------------------------------------------------------------------------------|--------------------------|------------|---------------|----------------------------|--------------------------------|----------|---------|----|--|
| 22.                                | IPI00200898                                                                                | Y                        | Y          | 0.3           | 1                          | 5                              | 3        | 7       | 12 |  |
| *Des:                              | Ezrin-radixin-moesin binding phosphoprotein 50                                             |                          |            |               |                            |                                |          |         |    |  |
|                                    | SEQUEST:(PepMatched Observed.Hits Coverage)                                                |                          |            | 5             | 2                          | 18%                            |          |         |    |  |
|                                    | Seq                                                                                        | Charge                   | Xcor       | Delta         | Proability                 | PepHits                        |          |         |    |  |
|                                    | AVDPDSPAEASGLR                                                                             | +2                       |            | 3.893         | 0.414                      | 0.9995                         | 1        |         |    |  |
|                                    | AQEKSEHTEPPAAADTKK                                                                         | +3                       |            | 3.382         | 0.325                      | 0.9987                         | 4        |         |    |  |
|                                    | AQEKSEHTEPPAAADTK                                                                          | +3                       |            | 3.154         | 0.426                      | 0.9999                         | 2        |         |    |  |
|                                    | KAGDQNEAEKSHLER                                                                            | +3                       |            | 3.892         | 0.416                      | 1.0000                         | 4        |         |    |  |
|                                    | LLVVDKETDEFFKK                                                                             | +3                       |            | 3.187         | 0.459                      | 1.0000                         | 1        |         |    |  |
|                                    | MASCOT:(PepMatched Observed.Hits Coverage)                                                 |                          |            | 3             | 2                          | 9.41%                          |          |         |    |  |
|                                    | Seq                                                                                        | Charge                   | ObservedMS | ExpectedMS    | CalculatedMS               |                                | PepScore | PepHits |    |  |
|                                    | AVDPDSPAEASGLR                                                                             | +2                       | 692.8450   | 1383.6754     | 1383.6630                  | 0.01                           | 80       | 4       |    |  |
|                                    | AQEKSEHTEPPAAADTKK                                                                         | +4                       |            | 485.2481      | 1936.9633                  | 1936.9490                      | 0.01     | 42      | 6  |  |
|                                    | AQEKSEHTEPPAAADTK                                                                          | +3                       |            | 603.9642      | 1808.8709                  | 1808.8540                      | 0.02     | 43      | 4  |  |
| No.                                | Protein                                                                                    | Matched (SEQUEST MASCOT) | emPAI      | Strategy.Hits | PepMatched(SEQUEST MASCOT) | SpectraMatched(SEQUEST MASCOT) |          |         |    |  |
| 23.                                | IPI00285606                                                                                | Y                        | Y          | 0.7           | 1                          | 3                              | 2        | 3       | 2  |  |
| *Des:                              | Cell division cycle 42                                                                     |                          |            |               |                            |                                |          |         |    |  |
|                                    | SEQUEST:(PepMatched Observed.Hits Coverage)                                                |                          |            | 3             | 1                          | 22.56%                         |          |         |    |  |
|                                    | Seq                                                                                        | Charge                   | Xcor       | Delta         | Proability                 | PepHits                        |          |         |    |  |
|                                    | TPFLLVGTQIDLRDDPSTIEK                                                                      | +2                       |            | 4.430         | 0.606                      | 0.9955                         | 2        |         |    |  |
|                                    | GLKNVFDEAILAALEPPEPKK                                                                      | +3                       |            | 4.481         | 0.671                      | 1.0000                         | 2        |         |    |  |
|                                    | GLKNVFDEAILAALEPPEPK                                                                       | +3                       |            | 3.153         | 0.443                      | 0.9863                         | 1        |         |    |  |
|                                    | MASCOT:(PepMatched Observed.Hits Coverage)                                                 |                          |            | 2             | 1                          | 22.56%                         |          |         |    |  |
|                                    | Seq                                                                                        | Charge                   | ObservedMS | ExpectedMS    | CalculatedMS               |                                | PepScore | PepHits |    |  |
|                                    | GLKNVFDEAILAALEPPEPKK                                                                      | +3                       | 760.43     | 2278.27       | 2278.26                    | 0.01                           | 41       | 1       |    |  |
|                                    | TPFLLVGTQIDLRDDPSTIEK                                                                      | +3                       |            | 786.76        | 2357.25                    | 2357.25                        | 0        | 45      | 1  |  |
| No.                                | Protein                                                                                    | Matched (SEQUEST MASCOT) | emPAI      | Strategy.Hits | PepMatched(SEQUEST MASCOT) | SpectraMatched(SEQUEST MASCOT) |          |         |    |  |
| 24.                                | IPI00188505                                                                                | Y                        | Y          | 0.6           | 1                          | 4                              | 4        | 11      | 12 |  |
| *Des:                              | Enoyl Coenzyme A hydratase domain containing 1                                             |                          |            |               |                            |                                |          |         |    |  |
|                                    | SEQUEST:(PepMatched Observed.Hits Coverage)                                                |                          |            | 4             | 1                          | 18.04%                         |          |         |    |  |
|                                    | Seq                                                                                        | Charge                   | Xcor       | Delta         | Proability                 | PepHits                        |          |         |    |  |
|                                    | DVLETLWGGPANLEIAIK                                                                         | +2                       |            | 3.744         | 0.335                      | 0.9919                         | 2        |         |    |  |
|                                    | ILEQFPGGSIDLQK                                                                             | +2                       |            | 4.608         | 0.259                      | 0.9992                         | 3        |         |    |  |
|                                    | VIELENWTEGK                                                                                | +2                       |            | 3.414         | 0.501                      | 1.0000                         | 5        |         |    |  |
|                                    | ELYLEEALQNER                                                                               | +2                       |            | 4.169         | 0.452                      | 1.0000                         | 3        |         |    |  |
|                                    | MASCOT:(PepMatched Observed.Hits Coverage)                                                 |                          |            | 4             | 1                          | 14.98%                         |          |         |    |  |
|                                    | Seq                                                                                        | Charge                   | ObservedMS | ExpectedMS    | CalculatedMS               |                                | PepScore | PepHits |    |  |
|                                    | LVEIIGSR                                                                                   | +2                       | 443.77     | 885.53        | 885.53                     | 0                              | 51       | 4       |    |  |
|                                    | VIELENWTEGK                                                                                | +2                       | 659.33     | 1316.65       | 1316.66                    | 0                              | 60       | 5       |    |  |
|                                    | ILEQFPGGSIDLQK                                                                             | +2                       | 772.93     | 1543.84       | 1543.82                    | 0.02                           | 94       | 3       |    |  |
|                                    | ELYLEEALQNER                                                                               | +2                       | 753.88     | 1505.75       | 1505.74                    | 0.01                           | 71       | 4       |    |  |
| No.                                | Protein                                                                                    | Matched (SEQUEST MASCOT) | emPAI      | Strategy.Hits | PepMatched(SEQUEST MASCOT) | SpectraMatched(SEQUEST MASCOT) |          |         |    |  |
| 25.                                | IPI00371204                                                                                | Y                        | N          | 0.22          | 1                          | 2                              | 0        | 2       | 0  |  |
| *Des:                              | PREDICTED: similar to eukaryotic translation initiation factor 3, subunit 5 epsilon, 47kDa |                          |            |               |                            |                                |          |         |    |  |

Identified Human Platelet Proteins

| SEQUEST:(PepMatched Observed.Hits Coverage) |        |      |       |            |         |   |  |
|---------------------------------------------|--------|------|-------|------------|---------|---|--|
| Seq                                         | Charge | Xcor | Delta | Proability | PepHits |   |  |
| VIGLSSDLQQVGGASAR                           | +2     |      | 4.873 | 0.623      | 1.0000  | 1 |  |
| IQDALSTVLQYAEDVLSGK                         | +2     |      | 6.077 | 0.647      | 1.0000  | 2 |  |

MASCOT:(PepMatched Observed.Hits Coverage)

No. 26. Protein IPI00231925 Matched (SEQUEST MASCOT) Y Y emPAI 0.54 Strategy.Hits 1 PepMatched(SEQUEST MASCOT) 5 SpectraMatched(SEQUEST MASCOT) 9  
 \*Des: Guanine nucleotide-binding protein G(i), alpha-2 subunit

| SEQUEST:(PepMatched Observed.Hits Coverage) |        |      |       |            |         |   |  |
|---------------------------------------------|--------|------|-------|------------|---------|---|--|
| Seq                                         | Charge | Xcor | Delta | Proability | PepHits |   |  |
| YDEAASYIQSK                                 | +2     |      | 4.312 | 0.507      | 1.0000  | 7 |  |
| IAQSDYIPTQQDVLR                             | +2     |      | 4.433 | 0.536      | 1.0000  | 5 |  |
| AMGNLQIDFADPQR                              | +2     |      | 4.005 | 0.446      | 0.9998  | 4 |  |
| EYQLNDSAAYLNDLER                            | +3     |      | 3.998 | 0.431      | 0.9999  | 3 |  |
| AVVYSNTIQSIMAIVK                            | +2     |      | 5.668 | 0.632      | 1.0000  | 5 |  |

MASCOT:(PepMatched Observed.Hits Coverage)

| Seq              | Charge | ObservedMS | ExpectedMS | CalculatedMS | Pepscore | PepHits |
|------------------|--------|------------|------------|--------------|----------|---------|
| YDEAASYIQSK      | +2     | 637.80     | 1273.59    | 1273.58      | 0.01     | 81      |
| MFDVGGQR         | +2     | 454.25     | 906.49     | 908.42       | -1.92    | 47      |
| IAQSDYIPTQQDVLR  | +2     | 873.96     | 1745.91    | 1745.89      | 0.02     | 68      |
| TTGIVETHFTFK     | +2     | 690.87     | 1379.72    | 1379.71      | 0.01     | 66      |
| LLLLGAGESGKSTIVK | +3     | 529.32     | 1584.94    | 1584.94      | 0        | 47      |
| AMGNLQIDFADPQR   | +2     | 788.39     | 1574.76    | 1574.75      | 0.01     | 72      |
| LLLLGAGESGK      | +2     | 529.32     | 1056.62    | 1056.62      | 0        | 78      |
| AVVYSNTIQSIMAIVK | +2     | 868.99     | 1735.97    | 1735.95      | 0.02     | 139     |
| NVQFVFDVAVTDVVIK | +2     | 854.48     | 1706.94    | 1706.92      | 0.02     | 96      |

No. 27. Protein IPI00199867 Matched (SEQUEST MASCOT) Y Y emPAI 0.21 Strategy.Hits 2 PepMatched(SEQUEST MASCOT) 4 SpectraMatched(SEQUEST MASCOT) 4  
 \*Des: PREDICTED: similar to Elastin microfibril interfacier 1

| SEQUEST:(PepMatched Observed.Hits Coverage) |        |      |       |            |         |   |  |
|---------------------------------------------|--------|------|-------|------------|---------|---|--|
| Seq                                         | Charge | Xcor | Delta | Proability | PepHits |   |  |
| LDTVAGGLQGLR                                | +2     |      | 2.907 | 0.380      | 0.9722  | 2 |  |
| VSEILSALER                                  | +2     |      | 2.876 | 0.278      | 0.9894  | 1 |  |
| YLLSAVLTGHR                                 | +3     |      | 2.311 | 0.406      | 0.9993  | 2 |  |
| AETAGEAQQAMLEGLQILGR                        | +2     |      | 5.507 | 0.622      | 1.0000  | 1 |  |

MASCOT:(PepMatched Observed.Hits Coverage)

| Seq          | Charge | ObservedMS | ExpectedMS | CalculatedMS | Pepscore | PepHits |
|--------------|--------|------------|------------|--------------|----------|---------|
| LDTVAGGLQGLR | +2     | 600.84     | 1199.67    | 1198.67      | 1        | 66      |
| VSEILSALER   | +2     | 558.82     | 1115.62    | 1115.62      | 0        | 58      |
| VAFSAALSLPR  | +2     | 566.33     | 1130.65    | 1130.64      | 0.01     | 51      |
| YLLSAVLTGHR  | +2     | 615.81     | 1229.60    | 1228.69      | 0.91     | 42      |

No. 28. Protein IPI00471577 Matched (SEQUEST MASCOT) Y Y emPAI 0.59 Strategy.Hits 1 PepMatched(SEQUEST MASCOT) 5 SpectraMatched(SEQUEST MASCOT) 4  
 \*Des: Ubiquinol-cytochrome c reductase core protein I

Identified Human Platelet Proteins

| SEQUEST:(PepMatched Observed.Hits Coverage) |        | 5          | 2          | 15.36%       |         |                  |
|---------------------------------------------|--------|------------|------------|--------------|---------|------------------|
| Seq                                         | Charge | Xcor       | Delta      | Probability  | PepHits |                  |
| IEEVDAQMVR                                  | +2     |            | 3.862      | 0.431        | 0.9999  | 3                |
| EVESIGAHLNAYSTR                             |        | +2         | 4.363      | 0.443        | 0.9999  | 2                |
| RIPLAEWESR                                  | +3     |            | 3.348      | 0.364        | 0.9993  | 3                |
| NNGAGYFLEHLAFK                              | +2     |            | 3.286      | 0.451        | 0.9995  | 2                |
| VVELLADIVQNISLEDSQIEK                       | +3     |            | 5.950      | 0.563        | 1.0000  | 2                |
| MASCOT:(PepMatched Observed.Hits Coverage)  |        | 4          | 2          | 12.09%       |         |                  |
| Seq                                         | Charge | ObservedMS | ExpectedMS | CalculatedMS |         | PepScore PepHits |
| IEEVDAQMVR                                  | +2     | 595.30     | 1188.58    | 1188.58      | 0       | 65 3             |
| EVESIGAHLNAYSTR                             |        | +2         | 823.92     | 1645.82      | 1645.81 | 0.01 58 2        |
| IPLAEWESR                                   | +2     | 550.79     | 1099.57    | 1099.57      | 0       | 52 1             |
| VVELLADIVQNISLEDSQIEK                       | +3     | 785.76     | 2354.26    | 2354.26      | 0       | 50 1             |

No. Protein Matched (SEQUEST MASCOT) emPAI Strategy.Hits PepMatched(SEQUEST MASCOT) SpectraMatched(SEQUEST MASCOT)  
 29. IPI00231927 N Y 0.21 2 0 6 0 49

\*Des: ADP,ATP carrier protein 1

| SEQUEST:(PepMatched Observed.Hits Coverage) |        | 6          | 2          | 23.17%       |      |                  |
|---------------------------------------------|--------|------------|------------|--------------|------|------------------|
| Seq                                         | Charge | ObservedMS | ExpectedMS | CalculatedMS |      | PepScore PepHits |
| GNLANVIR                                    | +2     | 428.76     | 855.50     | 855.49       | 0.01 | 42 6             |
| VKLLLQVQHASK                                | +2     | 682.43     | 1362.85    | 1362.83      | 0.02 | 74 10            |
| AAYFGVYDTAK                                 | +2     | 603.30     | 1204.58    | 1204.58      | 0    | 44 2             |
| GAWSNVLR                                    | +2     | 451.75     | 901.48     | 901.48       | 0    | 42 6             |
| DFLAGGIAAAVSK                               | +2     | 610.34     | 1218.67    | 1218.66      | 0.01 | 86 2             |
| YFPTQALNFAFK                                | +2     | 723.88     | 1445.75    | 1445.73      | 0.02 | 85 49            |

No. Protein Matched (SEQUEST MASCOT) emPAI Strategy.Hits PepMatched(SEQUEST MASCOT) SpectraMatched(SEQUEST MASCOT)  
 30. IPI00212401 Y N 0.33 1 3 0 3 0

\*Des: Calumenin precursor

| SEQUEST:(PepMatched Observed.Hits Coverage) |        | 3          | 1          | 20.56%       |         |                  |
|---------------------------------------------|--------|------------|------------|--------------|---------|------------------|
| Seq                                         | Charge | Xcor       | Delta      | Probability  | PepHits |                  |
| MDKEETKDWILPSDYDHAEAEAR                     |        | +3         | 5.384      | 0.512        | 1.0000  | 2                |
| EEFTAFLHPEEYDYMK                            |        | +2         | 3.868      | 0.374        | 0.9993  | 1                |
| EEIVDKYDLFVGSQATDFGEALVR                    |        | +3         | 5.012      | 0.504        | 1.0000  | 2                |
| MASCOT:(PepMatched Observed.Hits Coverage)  |        | 4          | 1          | 13.31%       |         |                  |
| Seq                                         | Charge | ObservedMS | ExpectedMS | CalculatedMS |         | PepScore PepHits |

No. Protein Matched (SEQUEST MASCOT) emPAI Strategy.Hits PepMatched(SEQUEST MASCOT) SpectraMatched(SEQUEST MASCOT)  
 31. IPI00208454 Y Y 0.41 2 3 4 9 11

\*Des: PREDICTED: similar to actin-related protein complex 1b

| SEQUEST:(PepMatched Observed.Hits Coverage) |        | 3          | 2          | 12.1%        |         |                  |
|---------------------------------------------|--------|------------|------------|--------------|---------|------------------|
| Seq                                         | Charge | Xcor       | Delta      | Probability  | PepHits |                  |
| EHNGQVTGIDWAPESNR                           |        | +2         | 3.043      | 0.265        | 0.9949  | 2                |
| TQIAICPNNHEVHIYEK                           |        | +2         | 4.795      | 0.580        | 1.0000  | 4                |
| NSVSQISVLSGGK                               |        | +2         | 3.332      | 0.593        | 1.0000  | 8                |
| MASCOT:(PepMatched Observed.Hits Coverage)  |        | 4          | 1          | 13.31%       |         |                  |
| Seq                                         | Charge | ObservedMS | ExpectedMS | CalculatedMS |         | PepScore PepHits |

Identified Human Platelet Proteins

|                    |    |          |           |           |      |    |    |  |
|--------------------|----|----------|-----------|-----------|------|----|----|--|
| NSVSQISVLSSGGK     | +2 | 638.3543 | 1274.6941 | 1274.6830 | 0.01 | 72 | 4  |  |
| GSTEGGAATGAGLDSLHK | +2 | 814.9053 | 1627.7961 | 1627.7801 | 0.02 | 93 | 2  |  |
| LDVVKQNSQR         | +2 | 592.8272 | 1183.6399 | 1183.6309 | 0.01 | 47 | 1  |  |
| TWKPTLVILR         | +3 | 409.5946 | 1225.7621 | 1225.7547 | 0.01 | 60 | 12 |  |

No. 32. Protein IPI00207725 Matched (SEQUEST MASCOT) Y Y emPAI Strategy.Hits 0.73 2 PepMatched(SEQUEST MASCOT) 7 8 SpectraMatched(SEQUEST MASCOT) 21 21

\*Des: PREDICTED: similar to purine-nucleoside phosphorylase

|                                             |        |            |            |              |         |       |          |         |
|---------------------------------------------|--------|------------|------------|--------------|---------|-------|----------|---------|
| SEQUEST:(PepMatched Observed.Hits Coverage) | 7      | 3          | 40.47%     |              |         |       |          |         |
| Seq                                         | Charge | Xcor       | Delta      | Probability  | PepHits |       |          |         |
| FEVGDIMLIR                                  |        | +2         | 3.835      | 0.315        | 0.9996  | 3     |          |         |
| LEQFVSILMESIPPR                             |        | +3         | 3.959      | 0.338        | 0.9995  | 4     |          |         |
| FPAMSDAYDR                                  |        | +2         | 3.144      | 0.361        | 0.9992  | 5     |          |         |
| LTQPQAFDYNEIPNFPQSTVQGHAGR                  |        | +3         | 4.279      | 0.501        | 1.0000  | 1     |          |         |
| MLGADAVGMSTVPEVIVAR                         |        | +2         | 5.821      | 0.530        | 1.0000  | 7     |          |         |
| VFGFSLITNK                                  |        | +2         | 2.838      | 0.297        | 0.9947  | 9     |          |         |
| VFHLLGVDTLVVTNAAGGLNPK                      |        | +3         | 4.663      | 0.454        | 1.0000  | 6     |          |         |
| MASCOT:(PepMatched Observed.Hits Coverage)  | 8      | 3          | 43.87%     |              |         |       |          |         |
| Seq                                         | Charge | ObservedMS | ExpectedMS | CalculatedMS |         |       | PepScore | PepHits |
| FPAMSDAYDR                                  |        | +2         | 586.32     | 1170.63      | 1171.50 | -0.86 | 64       | 5       |
| MLGADAVGMSTVPEVIVAR                         |        | +2         | 958.51     | 1915.01      | 1914.99 | 0.02  | 112      | 7       |
| LTQPQAFDYNEIPNFPQSTVQGHAGR                  |        | +3         | 972.48     | 2914.43      | 2914.40 | 0.03  | 79       | 1       |
| LVFGFLNGR                                   |        | +2         | 511.80     | 1021.58      | 1021.57 | 0.01  | 45       | 7       |
| VFGFSLITNK                                  |        | +2         | 563.32     | 1124.63      | 1124.62 | 0.01  | 43       | 10      |
| FEVGDIMLIR                                  |        | +2         | 596.83     | 1191.64      | 1191.63 | 0.01  | 71       | 3       |
| VFHLLGVDTLVVTNAAGGLNPK                      |        | +3         | 745.76     | 2234.26      | 2234.24 | 0.02  | 57       | 5       |
| LEQFVSILMESIPPR                             |        | +3         | 586.99     | 1757.95      | 1757.94 | 0.01  | 46       | 5       |

No. 33. Protein IPI00206850 Matched (SEQUEST MASCOT) Y Y emPAI Strategy.Hits 0.1 3 PepMatched(SEQUEST MASCOT) 3 4 SpectraMatched(SEQUEST MASCOT) 5 5

\*Des: Unc-13 homolog D

|                                             |        |            |            |              |           |      |          |         |
|---------------------------------------------|--------|------------|------------|--------------|-----------|------|----------|---------|
| SEQUEST:(PepMatched Observed.Hits Coverage) | 3      | 3          | 3.43%      |              |           |      |          |         |
| Seq                                         | Charge | Xcor       | Delta      | Probability  | PepHits   |      |          |         |
| AVQMDSLVLPLGELTK                            |        | +2         | 3.781      | 0.441        | 0.9990    | 2    |          |         |
| IQQAETTSER                                  |        | +2         | 3.548      | 0.429        | 0.9992    | 2    |          |         |
| HEFPELAPR                                   |        | +2         | 2.766      | 0.432        | 0.9976    | 2    |          |         |
| MASCOT:(PepMatched Observed.Hits Coverage)  | 4      | 3          | 4.33%      |              |           |      |          |         |
| Seq                                         | Charge | ObservedMS | ExpectedMS | CalculatedMS |           |      | PepScore | PepHits |
| NSSLASSR                                    |        | +2         | 411.2115   | 820.4085     | 820.4039  | 0    | 51       | 1       |
| IQQAETTSER                                  |        | +2         | 645.8251   | 1289.6357    | 1289.6211 | 0.01 | 49       | 2       |
| KDKGQDDFLGNVMLR                             |        | +3         | 579.3022   | 1734.8847    | 1734.8722 | 0.01 | 44       | 1       |
| LGQPEPNHVK                                  |        | +2         | 559.8044   | 1117.5942    | 1117.5880 | 0.01 | 41       | 2       |

No. 34. Protein IPI00231929 Matched (SEQUEST MASCOT) N Y emPAI Strategy.Hits 0.77 1 PepMatched(SEQUEST MASCOT) 0 7 SpectraMatched(SEQUEST MASCOT) 0 50

\*Des: Pyruvate kinase, muscle

SEQUEST:(PepMatched Observed.Hits Coverage)

Identified Human Platelet Proteins

| MASCOT:(PepMatched Observed.Hits Coverage) |        | 7          | 1          | 20.11%       |      |    |          |         |  |
|--------------------------------------------|--------|------------|------------|--------------|------|----|----------|---------|--|
| Seq                                        | Charge | ObservedMS | ExpectedMS | CalculatedMS |      |    | PepScore | PepHits |  |
| IYVDDGLISLQVK                              | +2     | 731.4581   | 1460.9016  | 1461.8078    | -0.9 | 65 | 11       |         |  |
| LDIDSAPITAR                                | +2     | 586.3193   | 1170.6240  | 1170.6244    | 0    | 65 | 29       |         |  |
| GADYLVTEVENGGSLGSK                         | +2     | 898.4398   | 1794.8651  | 1794.8635    | 0    | 90 | 4        |         |  |
| GSGTAEVELKK                                | +2     | 560.2437   | 1118.4729  | 1117.5978    | 0.88 | 48 | 5        |         |  |
| VNLAMNVGK                                  | +2     | 473.2630   | 944.5114   | 944.5113     | 0    | 44 | 4        |         |  |
| RFDEILEASDGIMVAR                           | +2     | 911.4614   | 1820.9082  | 1820.9090    | 0    | 59 | 10       |         |  |
| KGVNLPGAAVDLPVSEKDIQDLK                    | +3     | 826.4589   | 2476.3548  | 2476.3536    | 0    | 78 | 2        |         |  |

  

| No. | Protein     | Matched (SEQUEST MASCOT) | emPAI | Strategy.Hits | PepMatched(SEQUEST MASCOT) | SpectraMatched(SEQUEST MASCOT) |
|-----|-------------|--------------------------|-------|---------------|----------------------------|--------------------------------|
| 35. | IPI00231783 | Y                        | Y     | 0.33          | 1                          | 2                              |

\*Des: L-lactate dehydrogenase B chain

| SEQUEST:(PepMatched Observed.Hits Coverage) |        | 2     | 1     | 11.2%     |         |  |  |  |  |
|---------------------------------------------|--------|-------|-------|-----------|---------|--|--|--|--|
| Seq                                         | Charge | Xcor  | Delta | Probility | PepHits |  |  |  |  |
| LIAPVADDEAVPNNK                             | +2     | 3.545 | 0.504 | 0.9998    | 1       |  |  |  |  |
| GYTNWAIGLSVADLIESMLK                        | +2     | 5.352 | 0.554 | 1.0000    | 1       |  |  |  |  |

| MASCOT:(PepMatched Observed.Hits Coverage) |        | 2          | 1          | 7.96%        |   |    |          |         |  |
|--------------------------------------------|--------|------------|------------|--------------|---|----|----------|---------|--|
| Seq                                        | Charge | ObservedMS | ExpectedMS | CalculatedMS |   |    | PepScore | PepHits |  |
| IVVVTAGVR                                  | +2     | 457.30     | 912.58     | 912.58       | 0 | 48 | 2        |         |  |
| LIAPVADDEAVPNNK                            | +2     | 833.94     | 1665.86    | 1665.86      | 0 | 60 | 1        |         |  |

  

| No. | Protein     | Matched (SEQUEST MASCOT) | emPAI | Strategy.Hits | PepMatched(SEQUEST MASCOT) | SpectraMatched(SEQUEST MASCOT) |
|-----|-------------|--------------------------|-------|---------------|----------------------------|--------------------------------|
| 36. | IPI00365657 | Y                        | Y     | 1.02          | 4                          | 11                             |

\*Des: PREDICTED: similar to vasodilator-stimulated phosphoprotein

| SEQUEST:(PepMatched Observed.Hits Coverage) |        | 11    | 11    | 36.81%    |         |  |  |  |  |
|---------------------------------------------|--------|-------|-------|-----------|---------|--|--|--|--|
| Seq                                         | Charge | Xcor  | Delta | Probility | PepHits |  |  |  |  |
| ATVMLYDDSNKR                                | +2     | 2.977 | 0.424 | 0.9986    | 6       |  |  |  |  |
| GTGGGLMEEMNAMLAR                            | +2     | 4.131 | 0.516 | 1.0000    | 3       |  |  |  |  |
| SSSSVTTSEAHPSVPSDDSDLER                     | +3     | 4.121 | 0.552 | 1.0000    | 2       |  |  |  |  |
| MKEEIEVFVQELR                               | +2     | 5.249 | 0.541 | 1.0000    | 6       |  |  |  |  |
| RQPEHLER                                    | +2     | 2.813 | 0.269 | 0.9926    | 2       |  |  |  |  |
| VQIYHNPTANSFR                               | +2     | 3.770 | 0.393 | 0.9993    | 5       |  |  |  |  |
| LQPDQQVVINCAIIR                             | +2     | 3.732 | 0.507 | 0.9998    | 1       |  |  |  |  |
| VSKQEEASGGPLAPK                             | +3     | 4.422 | 0.464 | 1.0000    | 10      |  |  |  |  |
| YNQATPIFHQWR                                | +2     | 3.814 | 0.430 | 0.9997    | 8       |  |  |  |  |
| KLQPDQQVVINCAIIR                            | +3     | 4.941 | 0.364 | 1.0000    | 8       |  |  |  |  |
| KVSKQEEASGGPLAPK                            | +2     | 4.896 | 0.493 | 1.0000    | 9       |  |  |  |  |

| MASCOT:(PepMatched Observed.Hits Coverage) |        | 12         | 10         | 36.81%       |      |    |          |         |  |
|--------------------------------------------|--------|------------|------------|--------------|------|----|----------|---------|--|
| Seq                                        | Charge | ObservedMS | ExpectedMS | CalculatedMS |      |    | PepScore | PepHits |  |
| GTGGGLMEEMNAMLAR                           | +2     | 819.3817   | 1636.7489  | 1636.7370    | 0.01 | 63 | 3        |         |  |
| ATVMLYDDSNKR                               | +2     | 706.8490   | 1411.6834  | 1411.6765    | 0.01 | 54 | 3        |         |  |
| MKEEIEVFVQELR                              | +2     | 881.9844   | 1761.9542  | 1761.9334    | 0.02 | 97 | 5        |         |  |
| VKQELVEEVRK                                | +2     | 678.9028   | 1355.7911  | 1355.7772    | 0.01 | 50 | 2        |         |  |
| LQPDQQVVINCAIIR                            | +2     | 855.4744   | 1708.9342  | 1708.9294    | 0    | 78 | 1        |         |  |
| RQPEHLER                                   | +2     | 532.7866   | 1063.5586  | 1063.5523    | 0.01 | 44 | 1        |         |  |
| YNQATPIFHQWR                               | +2     | 780.8950   | 1559.7755  | 1559.7633    | 0.01 | 75 | 10       |         |  |

Identified Human Platelet Proteins

|                  |    |          |           |           |      |    |    |
|------------------|----|----------|-----------|-----------|------|----|----|
| VSKQEEASGGPLAPK  | +2 | 749.4046 | 1496.7947 | 1496.7834 | 0.01 | 77 | 10 |
| VQIYHNPTANSFR    | +2 | 773.8975 | 1545.7804 | 1545.7688 | 0.01 | 64 | 3  |
| WLPAGTGPQAFSR    | +2 | 694.3640 | 1386.7134 | 1386.7044 | 0.01 | 62 | 4  |
| KLQPDQQVVINCAIR  | +2 | 919.5259 | 1837.0372 | 1837.0243 | 0.01 | 91 | 8  |
| KVSKQEEASGGPLAPK | +2 | 813.4525 | 1624.8905 | 1624.8784 | 0.01 | 90 | 7  |

No. 37. Protein IPI00209258 Matched (SEQUEST MASCOT) Y Y emPAI Strategy.Hits 0.14 5 PepMatched(SEQUEST MASCOT) 15 SpectraMatched(SEQUEST MASCOT) 14 18 19

\*Des:

Spectrin alpha chain, brain

SEQUEST:(PepMatched Observed.Hits Coverage) 15 6 9.74%

| Seq                        | Charge | Xcor  | Delta | Proability | PepHits |   |  |
|----------------------------|--------|-------|-------|------------|---------|---|--|
| HQLLEADISAHEDR             | +3     | 3.698 | 0.465 | 1.0000     | 1       |   |  |
| SSEEIESAFR                 | +2     | 2.884 | 0.336 | 0.9617     | 1       |   |  |
| KFEFQTDLAAHEER             | +3     | 3.118 | 0.430 | 0.9999     | 1       | 1 |  |
| NQALNTDNYGHDLASVQALQR      | +3     | 4.341 | 0.491 | 1.0000     | 1       | 1 |  |
| DVTGAEALLER                | +2     | 2.974 | 0.306 | 0.9931     | 2       |   |  |
| GVIDMGNSLIER               | +2     | 3.028 | 0.357 | 0.9955     | 2       |   |  |
| KVEDLFLTFK                 | +2     | 3.222 | 0.399 | 0.9990     | 1       |   |  |
| AQLADSFHLQQFFR             | +2     | 3.889 | 0.473 | 0.9998     | 2       |   |  |
| LAALADQWQFLVQK             | +2     | 4.899 | 0.523 | 1.0000     | 2       |   |  |
| AGTFQAFEQFGQQLLAHGHYASPEIK | +3     | 5.363 | 0.496 | 1.0000     | 1       | 1 |  |
| DLMSWINGIR                 | +2     | 2.978 | 0.328 | 0.9961     | 1       |   |  |
| IAALQAFADQLIAVDHYAK        | +3     | 3.491 | 0.483 | 1.0000     | 1       | 1 |  |
| ALINADELANDVAGAEALLDR      | +3     | 3.970 | 0.476 | 1.0000     | 1       | 1 |  |
| MTLVASEDYGDTLAAIQGLLK      | +2     | 5.603 | 0.678 | 1.0000     | 1       | 1 |  |
| VLETAEDIQER                | +2     | 3.447 | 0.471 | 0.9998     | 1       |   |  |

MASCOT:(PepMatched Observed.Hits Coverage) 14 7 8.38%

| Seq                        | Charge | ObservedMS | ExpectedMS | CalculatedMS |      | Pepscore | PepHits |
|----------------------------|--------|------------|------------|--------------|------|----------|---------|
| LFGAAEVQR                  | +2     | 495.77     | 989.53     | 989.53       | 0    | 53       | 1       |
| VLETAEDIQER                | +2     | 651.83     | 1301.65    | 1301.65      | 0    | 67       | 1       |
| HQLLEADISAHEDR             | +3     | 545.27     | 1632.80    | 1632.79      | 0.01 | 65       | 1       |
| SSEEIESAFR                 | +2     | 578.31     | 1154.61    | 1153.53      | 1.08 | 45       | 1       |
| DVTGAEALLER                | +2     | 587.31     | 1172.60    | 1172.60      | 0    | 54       | 2       |
| GVIDMGNSLIER               | +2     | 652.34     | 1302.66    | 1302.66      | 0    | 52       | 2       |
| KFEFQTDLAAHEER             | +3     | 617.30     | 1848.88    | 1848.86      | 0.02 | 43       | 1       |
| NQALNTDNYGHDLASVQALQR      | +3     | 776.72     | 2327.13    | 2327.13      | 0    | 46       | 1       |
| KVEDLFLTFK                 | +2     | 655.87     | 1309.73    | 1309.73      | 0    | 56       | 1       |
| LAALADQWQFLVQK             | +2     | 815.96     | 1629.91    | 1629.89      | 0.02 | 87       | 2       |
| AQLADSFHLQQFFR             | +2     | 854.44     | 1706.86    | 1706.85      | 0.01 | 62       | 2       |
| DLMSWINGIR                 | +2     | 602.81     | 1203.60    | 1203.61      | 0    | 45       | 1       |
| IAALQAFADQLIAVDHYAK        | +3     | 686.71     | 2057.11    | 2057.09      | 0.02 | 50       | 2       |
| AGTFQAFEQFGQQLLAHGHYASPEIK | +3     | 959.15     | 2874.44    | 2874.41      | 0.03 | 65       | 1       |

No. 38. Protein IPI00362243 Matched (SEQUEST MASCOT) Y Y emPAI Strategy.Hits 0.83 1 PepMatched(SEQUEST MASCOT) 5 SpectraMatched(SEQUEST MASCOT) 2 6 3

\*Des:

GTP:AMP phosphotransferase mitochondrial

SEQUEST:(PepMatched Observed.Hits Coverage) 5 1 33.04%

Identified Human Platelet Proteins

| No.   | Protein                                                                                                                                                                           | Matched (SEQUEST MASCOT) | emPAI      | Strategy.Hits | PepMatched(SEQUEST MASCOT) | SpectraMatched(SEQUEST MASCOT) |        |         |         |      |    |   |
|-------|-----------------------------------------------------------------------------------------------------------------------------------------------------------------------------------|--------------------------|------------|---------------|----------------------------|--------------------------------|--------|---------|---------|------|----|---|
| 39.   | IPI00214945                                                                                                                                                                       | Y                        | Y          | 0.21          | 1                          | 3                              | 2      | 5       | 4       |      |    |   |
| *Des: | Heparanase                                                                                                                                                                        |                          |            |               |                            |                                |        |         |         |      |    |   |
|       | SEQUEST:(PepMatched Observed.Hits Coverage)                                                                                                                                       |                          |            |               | 3                          | 2                              | 9.9%   |         |         |      |    |   |
|       | Seq                                                                                                                                                                               | Charge                   | Xcor       | Delta         | Proability                 | PepHits                        |        |         |         |      |    |   |
|       | LYGPDIGQPR                                                                                                                                                                        |                          | +2         | 2.730         | 0.325                      | 0.9936                         | 2      |         |         |      |    |   |
|       | LDLIFGLNALLR                                                                                                                                                                      |                          | +2         | 3.882         | 0.341                      | 0.9991                         | 1      |         |         |      |    |   |
|       | QVFFGAGNYHLVDENFEPLPDYWLSLLFK                                                                                                                                                     |                          |            |               |                            | +3                             | 4.963  | 0.411   | 0.9998  | 1    |    |   |
|       | MASCOT:(PepMatched Observed.Hits Coverage)                                                                                                                                        |                          |            |               | 2                          | 2                              | 4.4%   |         |         |      |    |   |
|       | Seq                                                                                                                                                                               | Charge                   | ObservedMS | ExpectedMS    | CalculatedMS               | Pepscore PepHits               |        |         |         |      |    |   |
|       | LYGPDIGQPR                                                                                                                                                                        |                          | +2         | 558.30        | 1114.58                    | 1114.58                        | 0      | 49      | 2       |      |    |   |
|       | LDLIFGLNALLR                                                                                                                                                                      |                          | +2         | 679.42        | 1356.82                    | 1356.81                        | 0.01   | 52      | 2       |      |    |   |
| 40.   | IPI00207657                                                                                                                                                                       | Y                        | Y          | 0.24          | 1                          | 7                              | 4      | 10      | 6       |      |    |   |
| *Des: | PREDICTED: similar to Ubiquitin carboxyl-terminal hydrolase 5 (Ubiquitin thiolesterase 5) (Ubiquitin-specific processing protease 5) (Deubiquitinating enzyme 5) (Isopeptidase T) |                          |            |               |                            |                                |        |         |         |      |    |   |
|       | SEQUEST:(PepMatched Observed.Hits Coverage)                                                                                                                                       |                          |            |               | 7                          | 1                              | 14.2%  |         |         |      |    |   |
|       | Seq                                                                                                                                                                               | Charge                   | Xcor       | Delta         | Proability                 | PepHits                        |        |         |         |      |    |   |
|       | SAADSISESVPVGPK                                                                                                                                                                   |                          | +2         | 3.377         | 0.489                      | 0.9997                         | 1      |         |         |      |    |   |
|       | IFQNAPTDPTQDFSTQVAK                                                                                                                                                               |                          | +2         | 4.856         | 0.528                      | 1.0000                         | 1      |         |         |      |    |   |
|       | DGLGGLPDIVR                                                                                                                                                                       |                          | +2         | 2.763         | 0.379                      | 0.9974                         | 2      |         |         |      |    |   |
|       | VTSAVEALLSADSASR                                                                                                                                                                  |                          | +2         | 3.876         | 0.459                      | 0.9998                         | 1      |         |         |      |    |   |
|       | FASFPDYLVIIQIK                                                                                                                                                                    |                          | +2         | 3.604         | 0.523                      | 0.9999                         | 2      |         |         |      |    |   |
|       | IGEWELIQESGVPLKPLFGPGYTGIR                                                                                                                                                        |                          |            |               |                            | +3                             | 5.479  | 0.425   | 0.9999  | 2    |    |   |
|       | QQDAQEFFLHLINMVER                                                                                                                                                                 |                          |            |               |                            | +3                             | 3.675  | 0.444   | 0.9999  | 1    |    |   |
|       | MASCOT:(PepMatched Observed.Hits Coverage)                                                                                                                                        |                          |            |               | 4                          | 1                              | 8.47%  |         |         |      |    |   |
|       | Seq                                                                                                                                                                               | Charge                   | ObservedMS | ExpectedMS    | CalculatedMS               | Pepscore PepHits               |        |         |         |      |    |   |
|       | SAADSISESVPVGPK                                                                                                                                                                   |                          | +2         | 722.37        | 1442.73                    | 1442.73                        | 0      | 52      | 1       |      |    |   |
|       | VTSAVEALLSADSASR                                                                                                                                                                  |                          | +2         | 788.92        | 1575.82                    | 1575.81                        | 0.01   | 62      | 1       |      |    |   |
|       | FASFPDYLVIIQIK                                                                                                                                                                    |                          | +2         | 770.93        | 1539.84                    | 1539.83                        | 0.01   | 85      | 2       |      |    |   |
|       | IGEWELIQESGVPLKPLFGPGYTGIR                                                                                                                                                        |                          |            |               |                            | +3                             | 952.85 | 2855.53 | 2855.52 | 0.01 | 75 | 2 |
| 41.   | IPI00230986                                                                                                                                                                       | N                        | Y          | 0.35          | 1                          | 0                              | 3      | 0       | 13      |      |    |   |
| *Des: | Splice Isoform 2 of Reticulon 4                                                                                                                                                   |                          |            |               |                            |                                |        |         |         |      |    |   |

Identified Human Platelet Proteins

SEQUEST:(PepMatched Observed.Hits Coverage)

| Seq                 | Charge | ObservedMS | ExpectedMS | CalculatedMS | Pepscore | PepHits |
|---------------------|--------|------------|------------|--------------|----------|---------|
| SPAAPAPSLPPAAAVLPSK | +2     | 871.50     | 1740.99    | 1740.98 0.01 | 61       | 6       |
| AYLESEVAISEELVQK    | +2     | 904.48     | 1806.94    | 1806.93 0.01 | 44       | 5       |
| LFLVDDLVDLSK        | +2     | 688.89     | 1375.77    | 1375.76 0.01 | 57       | 2       |

| No. | Protein     | Matched (SEQUEST MASCOT) | emPAI | Strategy.Hits | PepMatched(SEQUEST MASCOT) | SpectraMatched(SEQUEST MASCOT) |
|-----|-------------|--------------------------|-------|---------------|----------------------------|--------------------------------|
| 42. | IPI00193983 | Y Y                      | 0.89  | 4             | 34 29                      | 56 49                          |

\*Des: Clathrin heavy chain

SEQUEST:(PepMatched Observed.Hits Coverage)

| Seq                          | Charge | Xcor  | Delta | Proability | PepHits |
|------------------------------|--------|-------|-------|------------|---------|
| RPISADSAIMNPASK              | +2     | 4.061 | 0.442 | 0.9997     | 2       |
| VANVELYYK                    | +2     | 2.937 | 0.344 | 0.9974     | 1       |
| VSQPIEGHAASFAQFK             | +2     | 3.933 | 0.543 | 0.9999     | 2       |
| KFNALFAQGNYSEAAK             | +2     | 5.103 | 0.555 | 1.0000     | 2       |
| LLYNNVSNFGR                  | +2     | 3.372 | 0.554 | 0.9999     | 3       |
| IVLDNSVFSEHR                 | +2     | 3.497 | 0.514 | 0.9999     | 1       |
| VVGAMQLYSVDR                 | +2     | 3.535 | 0.539 | 0.9999     | 1       |
| LHIIEVGTPTGNQPFPK            | +2     | 5.066 | 0.638 | 1.0000     | 2       |
| LASTLVHLGEYQAAVDGAR          | +2     | 5.271 | 0.653 | 1.0000     | 3       |
| GQFSTDELVAEVEKR              | +2     | 4.393 | 0.513 | 0.9999     | 2       |
| TSIDAYDNFDNISLAQR            | +2     | 5.334 | 0.569 | 1.0000     | 2       |
| GQFSTDELVAEVEK               | +2     | 3.347 | 0.433 | 0.9992     | 1       |
| ALEHFTDLYDIK                 | +2     | 3.622 | 0.454 | 0.9997     | 2       |
| NNLAGAEELFAR                 | +2     | 3.350 | 0.391 | 0.9899     | 2       |
| VGEQAQVVIIDMNDPSNPIR         | +3     | 3.344 | 0.420 | 0.9998     | 1       |
| LAELEEFINGPNNAHIQVGDGR       | +3     | 3.783 | 0.483 | 1.0000     | 1       |
| ISGETIFVTAPHEATAGIIGVNR      | +3     | 5.146 | 0.624 | 1.0000     | 1       |
| TLQIFNIEMK                   | +2     | 3.147 | 0.331 | 0.9974     | 1       |
| SVNESLNNLFITEEDYQALR         | +2     | 5.588 | 0.562 | 1.0000     | 3       |
| WLLLTGISAQQNR                | +2     | 3.509 | 0.518 | 0.9998     | 2       |
| RPLIDQVVQTALSETQDPEEVSIVTK   | +3     | 4.685 | 0.490 | 1.0000     | 1       |
| AHMGMFTELAILYSK              | +2     | 4.372 | 0.533 | 0.9999     | 2       |
| NLQNLILITAIK                 | +2     | 4.515 | 0.428 | 0.9999     | 1       |
| LLEMNLMHAPQVADAILGNQMFTHYDR  | +3     | 7.042 | 0.619 | 1.0000     | 2       |
| KFDVNTSAVQVLIEHIGNLDR        | +3     | 6.092 | 0.610 | 1.0000     | 2       |
| VGYPDWIFLLR                  | +2     | 3.489 | 0.442 | 0.9996     | 1       |
| YHEQLSTQSLIELFESFK           | +2     | 6.567 | 0.619 | 1.0000     | 2       |
| HNIMDFAMPYFIQVMK             | +2     | 4.530 | 0.707 | 1.0000     | 4       |
| WISLNTVALVTDNAVYHWSMEGESQPVK | +3     | 4.706 | 0.545 | 1.0000     | 1       |
| FDVHDLVLYLYR                 | +2     | 5.200 | 0.525 | 1.0000     | 3       |
| FQSVPAQPGQTSPLLYFGILLDQGQLNK | +3     | 5.615 | 0.614 | 1.0000     | 1       |
| AFMTADLPNELIELLEK            | +3     | 5.835 | 0.553 | 1.0000     | 2       |
| DTELAEELLQWFLQEEK            | +3     | 6.828 | 0.590 | 1.0000     | 4       |
| IYIDSNNNPER                  | +2     | 3.128 | 0.398 | 0.9988     | 1       |

MASCOT:(PepMatched Observed.Hits Coverage) 29 7 26.89%



Identified Human Platelet Proteins

| Seq                     | Charge | ObservedMS | ExpectedMS | CalculatedMS |      |     |   | Pepscore | PepHits |
|-------------------------|--------|------------|------------|--------------|------|-----|---|----------|---------|
| IYIDSNNNPER             | +2     | 667.83     | 1333.64    | 1333.63      | 0.01 | 64  | 2 |          |         |
| RPISADSAIMNPASK         | +2     | 779.41     | 1556.81    | 1556.80      | 0.01 | 42  | 2 |          |         |
| VANVELYYK               | +2     | 549.80     | 1097.58    | 1097.58      | 0    | 60  | 1 |          |         |
| LLYNNVSNFGR             | +2     | 648.84     | 1295.67    | 1295.66      | 0.01 | 54  | 4 |          |         |
| VVGAMQLYSVDR            | +2     | 669.35     | 1336.68    | 1336.68      | 0    | 59  | 2 |          |         |
| IVLDNSVFSEHR            | +2     | 708.37     | 1414.73    | 1414.72      | 0.01 | 82  | 1 |          |         |
| VSQPIEGHAASFAQFK        | +2     | 858.94     | 1715.87    | 1715.86      | 0.01 | 87  | 4 |          |         |
| KFNALFAQGNYSAAK         | +2     | 879.95     | 1757.88    | 1757.87      | 0.01 | 67  | 2 |          |         |
| LHIIEVGTPPTGNQPPFK      | +2     | 973.03     | 1944.05    | 1944.05      | 0    | 83  | 2 |          |         |
| LASTLVHLGEYQAAVDGAR     | +2     | 986.03     | 1970.05    | 1970.02      | 0.03 | 103 | 5 |          |         |
| TLQIFNIEMK              | +2     | 618.84     | 1235.66    | 1235.66      | 0    | 53  | 2 |          |         |
| NNLAGAEELFAR            | +2     | 653.34     | 1304.67    | 1303.65      | 1.02 | 69  | 4 |          |         |
| ALEHFTDLYDIK            | +2     | 732.87     | 1463.73    | 1463.73      | 0    | 53  | 4 |          |         |
| WLLLTGISAQQNR           | +2     | 750.42     | 1498.83    | 1498.83      | 0    | 65  | 2 |          |         |
| GQFSTDELVAEVEK          | +2     | 776.39     | 1550.76    | 1550.75      | 0.01 | 60  | 1 |          |         |
| GQFSTDELVAEVEKR         | +2     | 854.44     | 1706.86    | 1706.85      | 0.01 | 113 | 1 |          |         |
| TSIDAYDNFDNISLAQR       | +2     | 971.96     | 1941.91    | 1941.91      | 0    | 102 | 2 |          |         |
| ISGETIFVTAPHEATAGIIGVNR | +3     | 785.09     | 2352.26    | 2352.24      | 0.02 | 70  | 1 |          |         |
| LAELEEFINGPNNAHIQVGD    | +3     | 822.08     | 2463.23    | 2463.21      | 0.02 | 58  | 1 |          |         |
| RPLIDQVVQTALSETQDPEEVS  | +3     | 961.18     | 2880.52    | 2880.51      | 0.01 | 54  | 1 |          |         |
| NLQNLLILTAIK            | +2     | 677.43     | 1352.84    | 1352.84      | 0    | 82  | 2 |          |         |
| VGYPDWIFLLR             | +2     | 740.41     | 1478.80    | 1478.79      | 0.01 | 67  | 1 |          |         |
| FDFVHDLVLYLYR           | +2     | 850.45     | 1698.88    | 1698.88      | 0    | 93  | 3 |          |         |
| AHMGMFTELAILYSK         | +2     | 856.43     | 1710.85    | 1710.85      | 0    | 80  | 2 |          |         |
| AFMTADLPNELIELLEK       | +2     | 974.02     | 1946.02    | 1946.01      | 0.01 | 86  | 2 |          |         |
| HNIMDFAMPYFIQVMK        | +2     | 992.98     | 1983.95    | 1983.94      | 0.01 | 94  | 4 |          |         |
| DTELAEELLQWFLQEEK       | +3     | 707.68     | 2120.03    | 2120.03      | 0    | 62  | 2 |          |         |
| YHEQLSTQSLIELFESFK      | +3     | 733.71     | 2198.10    | 2198.09      | 0.01 | 42  | 1 |          |         |
| KFDVNTSAVQVLIHIGNLDR    | +3     | 790.10     | 2367.27    | 2367.25      | 0.02 | 81  | 1 |          |         |

No. 43. Protein IPI00387720 Matched (SEQUEST MASCOT) Y N emPAI 0.22 Strategy.Hits 2 PepMatched(SEQUEST MASCOT) 3 SpectraMatched(SEQUEST MASCOT) 5 0

\*Des: 36 kDa protein

| Seq                                                    | Charge | Xcor  | Delta | Probability | PepHits |
|--------------------------------------------------------|--------|-------|-------|-------------|---------|
| SEQUEST:(PepMatched Observed.Hits Coverage) 3 2 15.88% |        |       |       |             |         |
| ILGLLDTHLK                                             | +2     | 2.841 | 0.272 | 0.9903      | 1       |
| EYFSWEGAFQHVVGK                                        | +2     | 3.375 | 0.472 | 0.9997      | 2       |
| NAFASVILFGTNNSSSISGVVFR                                | +3     | 4.042 | 0.436 | 0.9997      | 1       |
| MASCOT:(PepMatched Observed.Hits Coverage)             |        |       |       |             |         |

No. 44. Protein IPI00191444 Matched (SEQUEST MASCOT) Y Y emPAI 0.55 Strategy.Hits 3 PepMatched(SEQUEST MASCOT) 6 SpectraMatched(SEQUEST MASCOT) 20 8

\*Des: 31 kDa protein

| Seq                                                    | Charge | Xcor  | Delta | Probability | PepHits |
|--------------------------------------------------------|--------|-------|-------|-------------|---------|
| SEQUEST:(PepMatched Observed.Hits Coverage) 6 3 27.04% |        |       |       |             |         |
| SGSGTMNLGGSLTR                                         | +2     | 4.280 | 0.450 | 1.0000      | 2       |

Identified Human Platelet Proteins

| Protein                                    | Matched (SEQUEST MASCOT) | emPAI      | Strategy.Hits | PepMatched(SEQUEST MASCOT) | SpectraMatched(SEQUEST MASCOT) |
|--------------------------------------------|--------------------------|------------|---------------|----------------------------|--------------------------------|
| YDPPLEDGAMPSAR+2                           | 3.020                    | 0.424      | 0.9992        | 3                          |                                |
| KLEVEANNAFDQYR +2                          | 5.279                    | 0.536      | 1.0000        | 5                          |                                |
| SPWSNKYDPPLEDGAMPSAR +3                    | 3.658                    | 0.501      | 0.9983        | 1                          |                                |
| STLNEIYFGK +2                              | 3.290                    | 0.469      | 0.9999        | 4                          |                                |
| LTSTVMLWLQTNK +2                           | 4.197                    | 0.453      | 1.0000        | 10                         |                                |
| MASCOT:(PepMatched Observed.Hits Coverage) | 4                        | 2          | 16.37%        |                            |                                |
| Seq                                        | Charge                   | ObservedMS | ExpectedMS    | CalculatedMS               | Pepscore PepHits               |
| STLNEIYFGK +2                              | 586.3450                 | 1170.6754  | 1170.5920     | 0.08                       | 41 2                           |
| YDPPLEDGAMPSAR+2                           | 759.9116                 | 1517.8086  | 1517.6820     | 0.13                       | 60 2                           |
| LEVEANNAFDQYR +2                           | 784.9346                 | 1567.8546  | 1567.7266     | 0.13                       | 62 2                           |
| SPWSNKYDPPLEDGAMPSAR +3                    | 740.0704                 | 2217.1894  | 2217.0160     | 0.17                       | 46 2                           |

No. 45. Protein IPI00202570 Matched (SEQUEST MASCOT) Y Y emPAI 0.02 Strategy.Hits 1 PepMatched(SEQUEST MASCOT) 2 SpectraMatched(SEQUEST MASCOT) 3 4

\*Des: Ras-related protein Rab-2A

| Protein                                     | Matched (SEQUEST MASCOT) | emPAI      | Strategy.Hits | PepMatched(SEQUEST MASCOT) | SpectraMatched(SEQUEST MASCOT) |
|---------------------------------------------|--------------------------|------------|---------------|----------------------------|--------------------------------|
| SEQUEST:(PepMatched Observed.Hits Coverage) | 2                        | 1          | 13.42%        |                            |                                |
| Seq                                         | Charge                   | Xcor       | Delta         | Probability                | PepHits                        |
| LQIWDTAGQESFR +2                            | 4.516                    | 0.593      | 1.0000        | 1                          |                                |
| TASNVEEAFINTAK +2                           | 4.353                    | 0.583      | 1.0000        | 2                          |                                |
| MASCOT:(PepMatched Observed.Hits Coverage)  | 2                        | 1          | 13.42%        |                            |                                |
| Seq                                         | Charge                   | ObservedMS | ExpectedMS    | CalculatedMS               | Pepscore PepHits               |
| LQIWDTAGQESFR +2                            | 775.8918                 | 1549.7691  | 1549.7525     | 0.02                       | 75 2                           |
| TASNVEEAFINTAK +2                           | 747.8864                 | 1493.7582  | 1493.7361     | 0.02                       | 85 2                           |

No. 46. Protein IPI00556929 Matched (SEQUEST MASCOT) N Y emPAI 0.58 Strategy.Hits 1 PepMatched(SEQUEST MASCOT) 0 SpectraMatched(SEQUEST MASCOT) 5 0 17

\*Des: Splice Isoform 1 of Voltage-dependent anion-selective channel protein 3

| Protein                                     | Matched (SEQUEST MASCOT) | emPAI      | Strategy.Hits | PepMatched(SEQUEST MASCOT) | SpectraMatched(SEQUEST MASCOT) |
|---------------------------------------------|--------------------------|------------|---------------|----------------------------|--------------------------------|
| SEQUEST:(PepMatched Observed.Hits Coverage) | 5                        | 2          | 29.16%        |                            |                                |
| MASCOT:(PepMatched Observed.Hits Coverage)  | 5                        | 2          | 29.16%        |                            |                                |
| Seq                                         | Charge                   | ObservedMS | ExpectedMS    | CalculatedMS               | Pepscore PepHits               |
| AEDFQLHTHVNDGTEFGGSIYQR +3                  | 874.41                   | 2620.22    | 2620.19       | 0.03                       | 76 2                           |
| LTLSALVDGK +2                               | 508.81                   | 1015.60    | 1015.59       | 0.01                       | 74 9                           |
| LTVDTIFVPNTGK +2                            | 702.90                   | 1403.78    | 1403.77       | 0.01                       | 62 6                           |
| IETSINLAWTAGSNTR +2                         | 924.47                   | 1846.93    | 1846.92       | 0.01                       | 100 9                          |
| WNTDNTLGTEISWENK +2                         | 954.45                   | 1906.89    | 1906.87       | 0.02                       | 84 3                           |

No. 47. Protein IPI00390733 Matched (SEQUEST MASCOT) N Y emPAI 0.29 Strategy.Hits 1 PepMatched(SEQUEST MASCOT) 0 SpectraMatched(SEQUEST MASCOT) 2 0 14

\*Des: PREDICTED: similar to Adenylate kinase 2

| Protein                                     | Matched (SEQUEST MASCOT) | emPAI      | Strategy.Hits | PepMatched(SEQUEST MASCOT) | SpectraMatched(SEQUEST MASCOT) |
|---------------------------------------------|--------------------------|------------|---------------|----------------------------|--------------------------------|
| SEQUEST:(PepMatched Observed.Hits Coverage) | 2                        | 1          | 10.59%        |                            |                                |
| MASCOT:(PepMatched Observed.Hits Coverage)  | 2                        | 1          | 10.59%        |                            |                                |
| Seq                                         | Charge                   | ObservedMS | ExpectedMS    | CalculatedMS               | Pepscore PepHits               |
| NGFLLDGFPR +2                               | 568.30                   | 1134.59    | 1134.58       | 0.01                       | 77 16                          |
| LVSDMVELIEK +2                              | 752.41                   | 1502.80    | 1502.79       | 0.01                       | 85 2                           |

No. 48. Protein IPI00471727 Matched (SEQUEST MASCOT) Y Y emPAI 0.78 Strategy.Hits 3 PepMatched(SEQUEST MASCOT) 4 SpectraMatched(SEQUEST MASCOT) 16 27 150

Identified Human Platelet Proteins

\*Des: 49 kDa protein

| SEQUEST:(PepMatched Observed.Hits Coverage) |        | 4          | 2          | 13.86%       |           |           |         |    |    |
|---------------------------------------------|--------|------------|------------|--------------|-----------|-----------|---------|----|----|
| Seq                                         | Charge | Xcor       | Delta      | Proability   | PepHits   |           |         |    |    |
| VAQLEAQCQEPCKDSVR                           |        |            | +2         | 4.829        | 0.537     | 1.0000    | 11      |    |    |
| IHDTTGKDCQDIANKGAK                          |        |            | +2         | 5.655        | 0.527     | 1.0000    | 41      |    |    |
| IHDTTGKDCQDIANK+2                           |        | 4.867      |            | 0.591        | 1.0000    | 13        |         |    |    |
| ATQQFLVYCEIDGSGNGWTVLQK                     |        |            | +3         | 4.564        | 0.475     | 1.0000    | 12      |    |    |
| MASCOT:(PepMatched Observed.Hits Coverage)  |        | 16         | 10         | 40.22%       |           |           |         |    |    |
| Seq                                         | Charge | ObservedMS | ExpectedMS | CalculatedMS |           | Pepscore  | PepHits |    |    |
| DCQDIANKGAK                                 |        | +2         | 581.7843   | 1161.5541    | 1161.5448 | 0.01      | 53      | 10 |    |
| VGPEVDKYL                                   |        | +2         | 525.7686   | 1049.5226    | 1049.5141 | 0.01      | 92      | 28 |    |
| TSTADYAMFR                                  |        | +2         | 581.7669   | 1161.5193    | 1161.5124 | 0.01      | 46      | 10 |    |
| DNCCILDER                                   |        | +2         | 540.7250   | 1079.4355    | 1079.4376 | 0         | 46      | 4  |    |
| YLQDIYTSNK                                  |        | +2         | 622.8163   | 1243.6181    | 1243.6084 | 0.01      | 61      | 24 |    |
| ITNLKQK                                     |        | +2         | 422.7692   | 843.5239     | 843.5178  | 0.01      | 41      | 12 |    |
| IHDTTGKDCQDIANK+2                           |        |            | 829.9010   | 1657.7875    | 1657.7730 | 0.01      | 94      | 4  |    |
| LDGSVDFKK                                   |        | +2         | 504.7743   | 1007.5340    | 1007.5287 | 0.01      | 44      | 4  |    |
| YLQDIYTSNKQK                                |        | +2         | 750.8957   | 1499.7768    | 1499.7620 | 0.01      | 72      | 6  |    |
| VAQLEAQCQEPCKDSVR                           |        | +2         | 952.4628   | 1902.9111    | 1902.8927 | 0.02      | 90      | 14 |    |
| IQLKDWGR                                    |        | +2         | 551.8074   | 1101.6002    | 1101.5931 | 0.01      | 47      | 12 |    |
| LDGSVDFKKNWIQYK                             |        | +2         | 920.9908   | 1839.9670    | 1839.9519 | 0.02      | 60      | 4  |    |
| IHDTTGKDCQDIANKGAK                          |        | +2         | 957.9788   | 1913.9431    | 1913.9265 | 0.02      | 111     | 24 |    |
| KMVEEILKYEALLLTHESSIR                       |        | +4         | 626.3499   | 2501.3706    | 2501.3563 | 0.01      | 78      | 8  |    |
| LSIGDGQQHHMGGSK                             |        | +2         | 776.3764   | 1550.7383    | 1550.7259 | 0.01      | 97      | 44 |    |
| AIQVYYNPDQPPKPGMIEGATQK                     |        | +2         |            | 1273.1544    | 2544.2943 | 2544.2682 | 0.03    | 84 | 52 |

No. Protein Matched (SEQUEST MASCOT) emPAI Strategy.Hits PepMatched(SEQUEST MASCOT) SpectraMatched(SEQUEST MASCOT)  
 49. IPI00471584 Y Y 0.19 3 4 17 9 71

\*Des: Heat shock 90kDa protein 1, beta

| SEQUEST:(PepMatched Observed.Hits Coverage) |        | 4          | 1          | 11.39%       |         |          |         |    |
|---------------------------------------------|--------|------------|------------|--------------|---------|----------|---------|----|
| Seq                                         | Charge | Xcor       | Delta      | Proability   | PepHits |          |         |    |
| KHLEINPDHPIVETLR                            |        | +2         | 4.870      | 0.511        | 1.0000  | 6        |         |    |
| YHTSQSGDEMTSLSEYVSR                         |        | +2         | 5.837      | 0.668        | 1.0000  | 4        |         |    |
| HSQFIGYPITLYLEK                             |        | +2         | 4.506      | 0.527        | 1.0000  | 2        |         |    |
| AVKDLVLLFETALLSSGFSLEDPPQTHSNR              |        | +3         |            | 5.637        | 0.608   | 1.0000   | 2       |    |
| MASCOT:(PepMatched Observed.Hits Coverage)  |        | 17         | 7          | 34.05%       |         |          |         |    |
| Seq                                         | Charge | ObservedMS | ExpectedMS | CalculatedMS |         | Pepscore | PepHits |    |
| YIDQEELNK                                   |        | +2         | 576.28     | 1150.55      | 1150.55 | 0        | 50      | 4  |
| YESLTDPSKLDGSK                              |        | +2         | 770.39     | 1538.76      | 1538.75 | 0.01     | 46      | 3  |
| SIYYITGESK                                  |        | +2         | 580.80     | 1159.58      | 1159.58 | 0        | 51      | 8  |
| KHLEINPDHPIVETLR                            |        | +2         | 956.04     | 1910.06      | 1910.04 | 0.02     | 63      | 3  |
| IDIIPNPQER                                  |        | +2         | 597.83     | 1193.65      | 1193.64 | 0.01     | 55      | 8  |
| VILHLKEDQTEYLEER                            |        | +3         | 672.36     | 2014.05      | 2014.04 | 0.01     | 41      | 10 |
| DNSTMGYMMAK                                 |        | +2         | 624.76     | 1247.50      | 1247.50 | 0        | 57      | 4  |
| TLTLVDTGIGMTK                               |        | +2         | 675.37     | 1348.73      | 1348.73 | 0        | 81      | 3  |
| YHTSQSGDEMTSLSEYVSR                         |        | +3         | 726.32     | 2175.93      | 2175.94 | 0        | 42      | 2  |
| GVVDSDELPLNISR                              |        | +2         | 757.40     | 1512.78      | 1512.78 | 0        | 82      | 4  |

Identified Human Platelet Proteins

|                            |    |        |         |         |      |     |    |  |  |
|----------------------------|----|--------|---------|---------|------|-----|----|--|--|
| ADLNNLGTIAK                | +2 | 621.86 | 1241.70 | 1241.70 | 0    | 56  | 16 |  |  |
| HFSVEGQLEFR                | +2 | 674.84 | 1347.66 | 1347.66 | 0    | 66  | 16 |  |  |
| NPDDITQEEYGEFYK            | +2 | 924.40 | 1846.79 | 1846.79 | 0    | 93  | 9  |  |  |
| SLTNDWEDHLAVK              | +2 | 764.37 | 1526.73 | 1526.74 | 0    | 62  | 6  |  |  |
| APFDLFENK                  | +2 | 540.78 | 1079.54 | 1079.53 | 0.01 | 42  | 1  |  |  |
| HSQFIGYPITLYLEK            | +2 | 904.99 | 1807.96 | 1807.95 | 0.01 | 80  | 2  |  |  |
| DLVLLFETALLSSGFSLEDPQTHSNR | +3 | 996.85 | 2987.54 | 2987.52 | 0.02 | 134 | 4  |  |  |

No. 50. Protein IPI00365734 Matched (SEQUEST MASCOT) N Y emPAI Strategy.Hits 0.3 1 PepMatched(SEQUEST MASCOT) 0 4 SpectraMatched(SEQUEST MASCOT) 0 6

\*Des: PREDICTED: similar to RIKEN cDNA 2410004H02

SEQUEST:(PepMatched Observed.Hits Coverage)

MASCOT:(PepMatched Observed.Hits Coverage)

| Seq           | Charge | ObservedMS | ExpectedMS | CalculatedMS | PepScore | PepHits |
|---------------|--------|------------|------------|--------------|----------|---------|
| GLDGAVDMGAR   | +2     | 531.26     | 1060.50    | 1060.50      | 0        | 84      |
| LLIQESVWDEAMK | +2     | 781.40     | 1560.79    | 1560.79      | 0        | 55      |
| ASLLWALAAALER | +2     | 692.90     | 1383.79    | 1383.79      | 0        | 51      |
| LLWTLESLVTGR  | +2     | 694.40     | 1386.79    | 1386.79      | 0        | 63      |

No. 51. Protein IPI00364932 Matched (SEQUEST MASCOT) Y Y emPAI Strategy.Hits 1.37 5 PepMatched(SEQUEST MASCOT) 8 9 SpectraMatched(SEQUEST MASCOT) 68 63

\*Des: 31 kDa protein

SEQUEST:(PepMatched Observed.Hits Coverage)

| Seq                        | Charge | Xcor  | Delta | Proability | PepHits |
|----------------------------|--------|-------|-------|------------|---------|
| ALYLSNDNDFEILPPDIGK        | +2     |       | 4.314 | 0.571      | 1.0000  |
| LTVLPPELGNLDLTGQK          | +3     |       | 5.739 | 0.490      | 1.0000  |
| NLEVLNFFNMQIEELPTQISSLQK   | +3     |       | 7.399 | 0.526      | 1.0000  |
| AENNPWVTPIADQFLGVSHVFEYIR  | +4     |       | 4.168 | 0.479      | 1.0000  |
| GISSMLDVNGLFSLAHITQLVLSHMK | +3     |       | 4.771 | 0.561      | 1.0000  |
| EIGELTQLK                  | +2     | 2.693 | 0.343 | 0.9974     | 10      |
| DNDLISLPK                  | +2     | 3.772 | 0.292 | 0.9995     | 15      |
| NQPEVDMSDR                 | +2     | 2.801 | 0.505 | 0.9999     | 2       |

MASCOT:(PepMatched Observed.Hits Coverage)

| Seq                        | Charge | ObservedMS | ExpectedMS | CalculatedMS | PepScore | PepHits |
|----------------------------|--------|------------|------------|--------------|----------|---------|
| NQPEVDMSDR                 | +2     | 595.76     | 1189.51    | 1189.50      | 0.01     | 52      |
| DNDLISLPK                  | +2     | 507.78     | 1013.55    | 1013.54      | 0.01     | 72      |
| EIGELTQLK                  | +2     | 515.80     | 1029.58    | 1029.57      | 0.01     | 55      |
| LTTVPPNVAELK               | +2     | 641.38     | 1280.74    | 1280.73      | 0.01     | 41      |
| LQILSLR                    | +2     | 421.78     | 841.54     | 841.54       | 0        | 48      |
| LTVLPPELGNLDLTGQK          | +2     | 904.52     | 1807.02    | 1807.01      | 0.01     | 99      |
| ALYLSNDNDFEILPPDIGK        | +3     | 674.02     | 2019.03    | 2019.02      | 0.01     | 44      |
| GISSMLDVNGLFSLAHITQLVLSHMK | +3     | 932.18     | 2793.52    | 2793.48      | 0.04     | 60      |
| NLEVLNFFNMQIEELPTQISSLQK   | +3     | 940.17     | 2817.48    | 2817.45      | 0.03     | 74      |

No. 52. Protein IPI00209261 Matched (SEQUEST MASCOT) N Y emPAI Strategy.Hits 0.1 1 PepMatched(SEQUEST MASCOT) 0 3 SpectraMatched(SEQUEST MASCOT) 0 3

\*Des: cGMP-inhibited 3',5'-cyclic phosphodiesterase A

**Identified Human Platelet Proteins**

|                                                    |                               |                                 |              |                      |                                   |                                       |     |    |  |                  |  |
|----------------------------------------------------|-------------------------------|---------------------------------|--------------|----------------------|-----------------------------------|---------------------------------------|-----|----|--|------------------|--|
| <b>SEQUEST:(PepMatched Observed.Hits Coverage)</b> |                               |                                 |              |                      |                                   |                                       |     |    |  |                  |  |
| <b>MASCOT:(PepMatched Observed.Hits Coverage)</b>  |                               |                                 |              |                      |                                   |                                       |     |    |  |                  |  |
|                                                    | Seq                           | Charge                          | ObservedMS   | ExpectedMS           | CalculatedMS                      |                                       |     |    |  | PepScore PepHits |  |
|                                                    | FLVIEAILATDLK                 | +2                              | 723.44       | 1444.87              | 1444.85                           | 0.02                                  | 102 | 1  |  |                  |  |
|                                                    | LFEDMGLFEAFK                  | +2                              | 723.85       | 1445.69              | 1445.69                           | 0                                     | 65  | 1  |  |                  |  |
|                                                    | FLVIEAILATDLKK                | +2                              | 787.48       | 1572.95              | 1572.95                           | 0                                     | 66  | 2  |  |                  |  |
| <b>No.</b>                                         | <b>Protein</b>                | <b>Matched (SEQUEST MASCOT)</b> | <b>emPAI</b> | <b>Strategy.Hits</b> | <b>PepMatched(SEQUEST MASCOT)</b> | <b>SpectraMatched(SEQUEST MASCOT)</b> |     |    |  |                  |  |
| 53.                                                | IPI00390595                   | N Y                             | 0.45         | 1                    | 0                                 | 4                                     | 0   | 21 |  |                  |  |
| <b>*Des:</b>                                       | Serine/threonine kinase 25    |                                 |              |                      |                                   |                                       |     |    |  |                  |  |
| <b>SEQUEST:(PepMatched Observed.Hits Coverage)</b> |                               |                                 |              |                      |                                   |                                       |     |    |  |                  |  |
| <b>MASCOT:(PepMatched Observed.Hits Coverage)</b>  |                               |                                 |              |                      |                                   |                                       |     |    |  |                  |  |
|                                                    | Seq                           | Charge                          | ObservedMS   | ExpectedMS           | CalculatedMS                      |                                       |     |    |  | PepScore PepHits |  |
|                                                    | AANVLLSEQGDVK                 | +2                              | 672.80       | 1343.58              | 1342.71                           | 0.87                                  | 54  | 18 |  |                  |  |
|                                                    | VLFLIPK                       | +2                              | 415.28       | 828.55               | 0                                 | 53                                    | 2   |    |  |                  |  |
|                                                    | LADFGVAGQLTDTQIK              | +2                              | 838.95       | 1675.88              | 1675.88                           | 0                                     | 72  | 2  |  |                  |  |
|                                                    | ADIWSLGITAIELAK               | +2                              | 800.95       | 1599.89              | 1599.89                           | 0                                     | 52  | 8  |  |                  |  |
| <b>No.</b>                                         | <b>Protein</b>                | <b>Matched (SEQUEST MASCOT)</b> | <b>emPAI</b> | <b>Strategy.Hits</b> | <b>PepMatched(SEQUEST MASCOT)</b> | <b>SpectraMatched(SEQUEST MASCOT)</b> |     |    |  |                  |  |
| 54.                                                | IPI00231864                   | Y Y                             | 0.56         | 1                    | 2                                 | 2                                     | 3   | 9  |  |                  |  |
| <b>*Des:</b>                                       | Cytochrome c, somatic         |                                 |              |                      |                                   |                                       |     |    |  |                  |  |
| <b>SEQUEST:(PepMatched Observed.Hits Coverage)</b> |                               |                                 |              |                      |                                   |                                       |     |    |  |                  |  |
|                                                    | Seq                           | Charge                          | Xcor         | Delta                | Probability                       | PepHits                               |     |    |  |                  |  |
|                                                    | GITWGEDTLMEYLENPKK            | +2                              |              | 5.030                | 0.461                             | 1.0000                                | 2   |    |  |                  |  |
|                                                    | GITWGEDTLMEYLENPK             | +2                              |              | 4.960                | 0.349                             | 0.9999                                | 1   |    |  |                  |  |
| <b>MASCOT:(PepMatched Observed.Hits Coverage)</b>  |                               |                                 |              |                      |                                   |                                       |     |    |  |                  |  |
|                                                    | Seq                           | Charge                          | ObservedMS   | ExpectedMS           | CalculatedMS                      |                                       |     |    |  | PepScore PepHits |  |
|                                                    | TGPNLHGLFGR                   | +2                              | 584.3656     | 1166.7167            | 1167.6148                         | -0.89                                 | 39  | 4  |  |                  |  |
|                                                    | GITWGEDTLMEYLENPKK            | +2                              | 1062.5375    | 2123.0604            | 2123.0244                         | 0.04                                  | 99  | 5  |  |                  |  |
| <b>No.</b>                                         | <b>Protein</b>                | <b>Matched (SEQUEST MASCOT)</b> | <b>emPAI</b> | <b>Strategy.Hits</b> | <b>PepMatched(SEQUEST MASCOT)</b> | <b>SpectraMatched(SEQUEST MASCOT)</b> |     |    |  |                  |  |
| 55.                                                | IPI00231865                   | N Y                             | 1.51         | 1                    | 0                                 | 2                                     | 0   | 7  |  |                  |  |
| <b>*Des:</b>                                       | Cytochrome c, testis-specific |                                 |              |                      |                                   |                                       |     |    |  |                  |  |
| <b>SEQUEST:(PepMatched Observed.Hits Coverage)</b> |                               |                                 |              |                      |                                   |                                       |     |    |  |                  |  |
| <b>MASCOT:(PepMatched Observed.Hits Coverage)</b>  |                               |                                 |              |                      |                                   |                                       |     |    |  |                  |  |
|                                                    | Seq                           | Charge                          | ObservedMS   | ExpectedMS           | CalculatedMS                      |                                       |     |    |  | PepScore PepHits |  |
|                                                    | TGQAPGFSYTDANK                | +2                              | 728.84       | 1455.67              | 1455.66                           | 0.01                                  | 80  | 5  |  |                  |  |
|                                                    | KTGQAPGFSYTDANK               | +2                              | 792.89       | 1583.77              | 1583.76                           | 0.01                                  | 66  | 3  |  |                  |  |
| <b>No.</b>                                         | <b>Protein</b>                | <b>Matched (SEQUEST MASCOT)</b> | <b>emPAI</b> | <b>Strategy.Hits</b> | <b>PepMatched(SEQUEST MASCOT)</b> | <b>SpectraMatched(SEQUEST MASCOT)</b> |     |    |  |                  |  |
| 56.                                                | IPI00204322                   | Y N                             | 0.08         | 1                    | 2                                 | 0                                     | 4   | 0  |  |                  |  |
| <b>*Des:</b>                                       | Dynamin-1                     |                                 |              |                      |                                   |                                       |     |    |  |                  |  |
| <b>SEQUEST:(PepMatched Observed.Hits Coverage)</b> |                               |                                 |              |                      |                                   |                                       |     |    |  |                  |  |
|                                                    | Seq                           | Charge                          | Xcor         | Delta                | Probability                       | PepHits                               |     |    |  |                  |  |
|                                                    | LDLMDEGTDAR                   | +2                              |              | 3.864                | 0.431                             | 0.9998                                | 3   |    |  |                  |  |
|                                                    | TIMHLMINNTK                   | +2                              |              | 2.737                | 0.403                             | 0.9981                                | 2   |    |  |                  |  |
| <b>MASCOT:(PepMatched Observed.Hits Coverage)</b>  |                               |                                 |              |                      |                                   |                                       |     |    |  |                  |  |

Identified Human Platelet Proteins

| No.   | Protein                                                            | Matched (SEQUEST MASCOT) | emPAI      | Strategy.Hits | PepMatched(SEQUEST MASCOT) | SpectraMatched(SEQUEST MASCOT) |
|-------|--------------------------------------------------------------------|--------------------------|------------|---------------|----------------------------|--------------------------------|
| 57.   | IPI00389331                                                        | Y Y                      | 0.05       | 1             | 2 2 3 4                    |                                |
| *Des: | Latent transforming growth factor beta binding protein 1 precursor |                          |            |               |                            |                                |
|       | SEQUEST:(PepMatched Observed.Hits Coverage)                        |                          |            | 2             | 1                          | 1.83%                          |
|       | Seq                                                                | Charge                   | Xcor       | Delta         | Probility                  | PepHits                        |
|       | LYQHAQQPGK                                                         | +2                       |            | 2.862         | 0.261                      | 0.9877 8                       |
|       | VKEVQPGQSQVSYQGLPVQK                                               | +3                       |            | 4.190         | 0.488                      | 1.0000 1                       |
|       | MASCOT:(PepMatched Observed.Hits Coverage)                         |                          |            | 2             | 1                          | 1.83%                          |
|       | Seq                                                                | Charge                   | ObservedMS | ExpectedMS    | CalculatedMS               | Pepscore PepHits               |
|       | LYQHAQQPGK                                                         | +2                       | 585.3109   | 1168.6073     | 1168.5989                  | 0.01 42 11                     |
|       | VKEVQPGQSQVSYQGLPVQK                                               | +3                       | 733.7354   | 2198.1844     | 2198.1694                  | 0.01 49 2                      |
| 58.   | IPI00194939                                                        | Y N                      | 0.11       | 1             | 2 0 5 0                    |                                |
| *Des: | PREDICTED: similar to C type lectin                                |                          |            |               |                            |                                |
|       | SEQUEST:(PepMatched Observed.Hits Coverage)                        |                          |            | 2             | 1                          | 5.17%                          |
|       | Seq                                                                | Charge                   | Xcor       | Delta         | Probility                  | PepHits                        |
|       | IVSNASCTTNCLAPLAK                                                  | +2                       |            | 4.178         | 0.351                      | 0.9990 6                       |
|       | AGAHLKGGAK                                                         | +2                       | 3.042      | 0.348         | 0.9889                     | 4                              |
|       | MASCOT:(PepMatched Observed.Hits Coverage)                         |                          |            |               |                            |                                |
| 59.   | IPI00327630                                                        | Y Y                      | 0.03       | 4             | 2 8 3 12                   |                                |
| *Des: | Dynein heavy chain, cytosolic                                      |                          |            |               |                            |                                |
|       | SEQUEST:(PepMatched Observed.Hits Coverage)                        |                          |            | 2             | 3                          | 0.88%                          |
|       | Seq                                                                | Charge                   | Xcor       | Delta         | Probility                  | PepHits                        |
|       | LVPLLEDGGDAPAALEAALEEK                                             | +3                       |            |               | 4.037                      | 0.275 0.9973 1                 |
|       | FYFVGDEDLLEIIGNSK                                                  | +2                       |            | 5.313         | 0.548                      | 1.0000 1                       |
|       | MASCOT:(PepMatched Observed.Hits Coverage)                         |                          |            | 8             | 2                          | 2.35%                          |
|       | Seq                                                                | Charge                   | ObservedMS | ExpectedMS    | CalculatedMS               | Pepscore PepHits               |
|       | KLEHLITELVHQR                                                      | +3                       | 539.32     | 1614.93       | 1614.92                    | 0.01 43 1                      |
|       | MIVLSLPR                                                           | +2                       | 465.27     | 928.53        | 927.56                     | 0.97 44 1                      |
|       | WQALLVQIR                                                          | +2                       | 563.84     | 1125.67       | 1125.67                    | 0 42 2                         |
|       | NTISLLVAGLK                                                        | +2                       | 564.86     | 1127.70       | 1127.69                    | 0.01 67 2                      |
|       | VDLLIIIEEK                                                         | +2                       | 593.84     | 1185.66       | 1185.65                    | 0.01 47 1                      |
|       | VTFVNFTVTR                                                         | +2                       | 592.33     | 1182.64       | 1182.64                    | 0 66 4                         |
|       | EVQALIAEGIALVWESYK                                                 | +3                       | 673.70     | 2018.09       | 2018.07                    | 0.02 41 1                      |
|       | LVAEDIPLLFSLSDVFPVQYHR                                             | +3                       |            | 910.17        | 2727.48                    | 2727.46 0.02 48 2              |
| 60.   | IPI00202651                                                        | Y Y                      | 0.97       | 4             | 23 8 97 50                 |                                |
| *Des: | Splice Isoform Alpha-E of Fibrinogen alpha/alpha-E chain precursor |                          |            |               |                            |                                |
|       | SEQUEST:(PepMatched Observed.Hits Coverage)                        |                          |            | 23            | 19                         | 36.18%                         |
|       | Seq                                                                | Charge                   | Xcor       | Delta         | Probility                  | PepHits                        |
|       | SQLQEGPPEWK                                                        | +2                       | 3.130      | 0.388         | 0.9997                     | 15                             |
|       | TSDSDIFTDIENPSSHVPEFSSSSK                                          | +2                       |            | 4.715         | 0.629                      | 1.0000 8                       |

Identified Human Platelet Proteins

|                                            |        |            |            |              |        |          |         |
|--------------------------------------------|--------|------------|------------|--------------|--------|----------|---------|
| GDFANANNFDNTFGQVSEDLRR                     | +3     | 3.995      | 0.472      | 1.0000       | 11     |          |         |
| MADEAASEAHQEGDTRTTKR                       | +3     | 3.775      | 0.506      | 1.0000       | 6      |          |         |
| MADEAASEAHQEGDTRTTK                        | +3     | 3.320      | 0.384      | 0.9999       | 2      |          |         |
| MADEAASEAHQEGDTR                           | +2     | 4.602      | 0.545      | 1.0000       | 3      |          |         |
| SYKMADEAASEAHQEGDTR                        | +3     | 3.300      | 0.453      | 1.0000       | 2      |          |         |
| EINLKDYEGQQK                               | +2     | 3.663      | 0.408      | 0.9997       | 3      |          |         |
| GDFANANNFDNTFGQVSEDLR                      | +2     | 4.906      | 0.427      | 1.0000       | 1      |          |         |
| NIMEYLRGDFANANNFDNTFGQVSEDLRR              | +3     |            | 4.869      | 0.536        | 1.0000 | 2        |         |
| TVLGNDGHREVVK                              | +2     | 3.119      | 0.486      | 0.9998       | 4      |          |         |
| GLIDEANQDFTNRINK                           | +2     | 4.301      | 0.512      | 1.0000       | 18     |          |         |
| EINLKDYEGQQKQLEQVIAK                       | +3     | 5.576      | 0.500      | 1.0000       | 14     |          |         |
| GDFANANNFDNTFGQVSEDLRRR                    | +3     | 3.117      | 0.431      | 0.9999       | 2      |          |         |
| LVTSKGDKELLIGNEK                           | +2     | 4.548      | 0.532      | 1.0000       | 19     |          |         |
| GDKELLIGNEKVTSTGTSTTR                      | +3     | 4.847      | 0.457      | 1.0000       | 5      |          |         |
| MKGLIDEANQDFTNRINK                         | +2     | 4.986      | 0.508      | 1.0000       | 5      |          |         |
| AQQIQVLQKDVRLQIDMK                         | +2     | 4.012      | 0.454      | 0.9999       | 6      |          |         |
| NNKDSNSLTR                                 | +2     | 2.769      | 0.260      | 0.9877       | 20     |          |         |
| RLEVDIDIKIR                                | +3     | 3.248      | 0.318      | 0.9997       | 28     |          |         |
| GLIDEANQDFTNRINKLK                         | +3     | 2.485      | 0.520      | 1.0000       | 15     |          |         |
| GLIDEANQDFTNR                              | +2     | 2.669      | 0.387      | 0.9988       | 15     |          |         |
| MKGLIDEANQDFTNR                            | +2     | 4.976      | 0.620      | 1.0000       | 9      |          |         |
| MASCOT:(PepMatched Observed.Hits Coverage) |        | 8          | 16         | 12.81%       |        |          |         |
| Seq                                        | Charge | ObservedMS | ExpectedMS | CalculatedMS |        | PepScore | PepHits |
| MADEAASEAHQEGDTR                           | +2     | 859.3680   | 1716.7214  | 1716.7009    | 0.02   | 80       | 16      |
| GLIDEANQDFTNR                              | +2     | 746.8620   | 1491.7094  | 1491.6953    | 0.01   | 62       | 6       |
| GDLPGDSRGDSATR                             | +2     | 702.3364   | 1402.6583  | 1402.6436    | 0.01   | 49       | 4       |
| GDKELLIGNEK                                | +2     | 608.3407   | 1214.6668  | 1214.6506    | 0.02   | 52       | 1       |
| SQLQEGPPEWK                                | +2     | 649.8320   | 1297.6494  | 1297.6302    | 0.02   | 55       | 14      |
| EINLKDYEGQQK                               | +2     | 732.8808   | 1463.7470  | 1463.7256    | 0.02   | 74       | 14      |
| MKGLIDEANQDFTNR                            | +2     | 876.4352   | 1750.8558  | 1750.8308    | 0.03   | 99       | 4       |
| GLIDEANQDFTNRINK                           | +2     | 924.4785   | 1846.9424  | 1846.9173    | 0.03   | 76       | 6       |

No. Protein Matched (SEQUEST MASCOT) emPAI Strategy.Hits PepMatched(SEQUEST MASCOT) SpectraMatched(SEQUEST MASCOT)  
 61. IPI00203528 Y Y 0.31 1 2 2 2 3

\*Des: PREDICTED: similar to stomatin-like protein 2

SEQUEST:(PepMatched Observed.Hits Coverage) 2 1 9.47%

| Seq               | Charge | Xcor  | Delta | Proability | PepHits |
|-------------------|--------|-------|-------|------------|---------|
| AEQINQAAGEASAVLAK | +2     | 4.729 | 0.548 | 1.0000     | 1       |
| ILEPGLNVLIPVLDR   | +2     | 3.170 | 0.490 | 0.9995     | 1       |

MASCOT:(PepMatched Observed.Hits Coverage) 2 1 9.47%

| Seq               | Charge | ObservedMS | ExpectedMS | CalculatedMS |      | PepScore | PepHits |
|-------------------|--------|------------|------------|--------------|------|----------|---------|
| AEQINQAAGEASAVLAK | +2     | 835.95     | 1669.88    | 1669.86      | 0.02 | 96       | 2       |
| ILEPGLNVLIPVLDR   | +2     | 831.01     | 1660.01    | 1659.99      | 0.02 | 55       | 1       |

No. Protein Matched (SEQUEST MASCOT) emPAI Strategy.Hits PepMatched(SEQUEST MASCOT) SpectraMatched(SEQUEST MASCOT)  
 62. IPI00191385 Y Y 0.07 1 3 3 4 4

\*Des: Phosphoinositide phosphatase SAC1

Identified Human Platelet Proteins

|       |                                                             |                                             |            |               |                            |                                |          |         |   |  |  |
|-------|-------------------------------------------------------------|---------------------------------------------|------------|---------------|----------------------------|--------------------------------|----------|---------|---|--|--|
|       |                                                             | Identified Human Platelet Proteins          |            |               |                            |                                |          |         |   |  |  |
| No.   | Protein                                                     | Matched (SEQUEST MASCOT)                    | emPAI      | Strategy.Hits | PepMatched(SEQUEST MASCOT) | SpectraMatched(SEQUEST MASCOT) |          |         |   |  |  |
| 63.   | IPI00422053                                                 | N                                           | Y          | 0.19          | 1                          | 0                              | 2        | 0       | 9 |  |  |
| *Des: | Galpha13                                                    |                                             |            |               |                            |                                |          |         |   |  |  |
|       |                                                             | SEQUEST:(PepMatched Observed.Hits Coverage) |            |               |                            |                                |          |         |   |  |  |
|       |                                                             | MASCOT:(PepMatched Observed.Hits Coverage)  |            |               |                            |                                |          |         |   |  |  |
|       | Seq                                                         | Charge                                      | Xcor       | Delta         | Probility                  | PepHits                        |          |         |   |  |  |
|       | LEEQDEFEK                                                   | +2                                          |            | 2.849         | 0.238                      | 0.9896                         | 2        |         |   |  |  |
|       | QDSIDLFLGNYSVDELDSHSPLSVPR                                  | +3                                          |            |               | 4.162                      | 0.350                          | 0.9999   | 1       |   |  |  |
|       | LSILLDQVAEMQDELSYFLVDSAGK                                   | +3                                          |            |               | 6.268                      | 0.554                          | 1.0000   | 2       |   |  |  |
|       | Seq                                                         | Charge                                      | ObservedMS | ExpectedMS    | CalculatedMS               |                                | Pepscore | PepHits |   |  |  |
|       | LEEQDEFEK                                                   | +2                                          | 583.7734   | 1165.5322     | 1165.5139                  | 0.02                           | 42       | 2       |   |  |  |
|       | LSILLDQVAEMQDELSYFLVDSAGK                                   | +3                                          |            | 928.8207      | 2783.4402                  | 2783.3938                      | 0.05     | 79      | 2 |  |  |
|       | QDSIDLFLGNYSVDELDSHSPLSVPR                                  | +3                                          |            | 968.4904      | 2902.4494                  | 2902.3984                      | 0.05     | 66      | 1 |  |  |
| No.   | Protein                                                     | Matched (SEQUEST MASCOT)                    | emPAI      | Strategy.Hits | PepMatched(SEQUEST MASCOT) | SpectraMatched(SEQUEST MASCOT) |          |         |   |  |  |
| 64.   | IPI00202658                                                 | Y                                           | Y          | 1.06          | 1                          | 5                              | 5        | 9       | 8 |  |  |
| *Des: | 3-hydroxyisobutyrate dehydrogenase, mitochondrial precursor |                                             |            |               |                            |                                |          |         |   |  |  |
|       |                                                             | SEQUEST:(PepMatched Observed.Hits Coverage) |            |               |                            |                                |          |         |   |  |  |
|       |                                                             | MASCOT:(PepMatched Observed.Hits Coverage)  |            |               |                            |                                |          |         |   |  |  |
|       | Seq                                                         | Charge                                      | Xcor       | Delta         | Probility                  | PepHits                        |          |         |   |  |  |
|       | DLGLAQDSATSTK                                               | +2                                          |            | 4.001         | 0.576                      | 1.0000                         | 4        |         |   |  |  |
|       | MGAVFMDAPVSGGVGAAR                                          | +2                                          |            |               | 5.035                      | 0.540                          | 1.0000   | 2       |   |  |  |
|       | TPILLGVAHQIYR                                               | +2                                          |            | 3.595         | 0.448                      | 0.9998                         | 4        |         |   |  |  |
|       | EAGEQVASSPADVAEK                                            | +2                                          |            |               | 3.700                      | 0.423                          | 0.9998   | 2       |   |  |  |
|       | TPVGFILGNMGNPMAK                                            | +2                                          |            | 4.003         | 0.435                      | 0.9999                         | 1        |         |   |  |  |
|       | Seq                                                         | Charge                                      | ObservedMS | ExpectedMS    | CalculatedMS               |                                | Pepscore | PepHits |   |  |  |
|       | DLGLAQDSATSTK                                               | +2                                          | 653.83     | 1305.65       | 1305.64                    | 0.01                           | 69       | 4       |   |  |  |
|       | EAGEQVASSPADVAEK                                            | +2                                          |            | 794.38        | 1586.74                    | 1586.74                        | 0        | 50      | 2 |  |  |
|       | TPILLGVAHQIYR                                               | +2                                          | 784.46     | 1566.90       | 1566.89                    | 0.01                           | 67       | 5       |   |  |  |
|       | MGAVFMDAPVSGGVGAAR                                          | +2                                          |            | 846.92        | 1691.83                    | 1691.81                        | 0.02     | 91      | 2 |  |  |
|       | TPVGFILGNMGNPMAK                                            | +2                                          |            | 852.44        | 1702.87                    | 1702.85                        | 0.02     | 74      | 1 |  |  |
| No.   | Protein                                                     | Matched (SEQUEST MASCOT)                    | emPAI      | Strategy.Hits | PepMatched(SEQUEST MASCOT) | SpectraMatched(SEQUEST MASCOT) |          |         |   |  |  |
| 65.   | IPI00200117                                                 | Y                                           | N          | 0.55          | 1                          | 2                              | 0        | 6       | 0 |  |  |
| *Des: | Syntenin-1                                                  |                                             |            |               |                            |                                |          |         |   |  |  |
|       |                                                             | SEQUEST:(PepMatched Observed.Hits Coverage) |            |               |                            |                                |          |         |   |  |  |
|       |                                                             | MASCOT:(PepMatched Observed.Hits Coverage)  |            |               |                            |                                |          |         |   |  |  |
|       | Seq                                                         | Charge                                      | Xcor       | Delta         | Probility                  | PepHits                        |          |         |   |  |  |
|       | PSSVNYMVAPVTGNDAGIR                                         | +2                                          |            |               | 5.630                      | 0.535                          | 1.0000   | 2       |   |  |  |
|       | SVDNGIFVQLVQANSPASLVGLR                                     | +2                                          |            |               | 6.263                      | 0.578                          | 1.0000   | 4       |   |  |  |



**Identified Human Platelet Proteins**

| No.   | Protein                                                        | Matched (SEQUEST MASCOT) | emPAI    | Strategy.Hits | PepMatched(SEQUEST MASCOT) | SpectraMatched(SEQUEST MASCOT) |
|-------|----------------------------------------------------------------|--------------------------|----------|---------------|----------------------------|--------------------------------|
| 66.   | IPI00421326                                                    | Y Y                      | 0.58     | 2             | 3 3                        | 4 4                            |
| *Des: | LRRGT00084                                                     |                          |          |               |                            |                                |
|       | SEQUEST:(PepMatched Observed.Hits Coverage)                    |                          |          | 3             | 2                          | 13.31%                         |
|       | Seq Charge Xcor Delta Probability PepHits                      |                          |          |               |                            |                                |
|       | LALQLHPDRNPDDPQAQEK                                            | +3                       | 4.441    | 0.492         | 1.0000                     | 1                              |
|       | TLEVEIEPGVR                                                    | +2                       | 3.165    | 0.9992        | 2                          |                                |
|       | FQDLGAAYEVLSDSEK                                               | +2                       | 3.920    | 0.556         | 1.0000                     | 1                              |
|       | MASCOT:(PepMatched Observed.Hits Coverage)                     |                          |          | 3             | 2                          | 14.4%                          |
|       | Seq Charge ObservedMS ExpectedMS CalculatedMS Pepscore PepHits |                          |          |               |                            |                                |
|       | TLEVEIEPGVR                                                    | +2                       | 621.3506 | 1240.6866     | 1240.6663                  | 0.02 44 1                      |
|       | FQDLGAAYEVLSDSEK                                               | +2                       | 886.4402 | 1770.8659     | 1770.8311                  | 0.03 118 2                     |
|       | DGMEYPPFIGEGEPHVDGEPGDLR                                       | +3                       | 839.3854 | 2515.1345     | 2515.0961                  | 0.04 35 2                      |
| 67.   | IPI00360589                                                    | N Y                      | 0.08     | 1             | 0 2                        | 0 2                            |
| *Des: | PREDICTED: complement component 7                              |                          |          |               |                            |                                |
|       | SEQUEST:(PepMatched Observed.Hits Coverage)                    |                          |          |               |                            |                                |
|       | MASCOT:(PepMatched Observed.Hits Coverage)                     |                          |          | 2             | 1                          | 2.64%                          |
|       | Seq Charge ObservedMS ExpectedMS CalculatedMS Pepscore PepHits |                          |          |               |                            |                                |
|       | FIFVSSANQR                                                     | +2                       | 584.81   | 1167.61       | 1167.60                    | 0.01 44 2                      |
|       | FLFFSSSSNR                                                     | +2                       | 596.29   | 1190.58       | 1190.57                    | 0.01 47 2                      |
| 68.   | IPI00554181                                                    | Y Y                      | 0.51     | 3             | 8 7                        | 58 30                          |
| *Des: | PREDICTED: zyxin                                               |                          |          |               |                            |                                |
|       | SEQUEST:(PepMatched Observed.Hits Coverage)                    |                          |          | 8             | 12                         | 23.26%                         |
|       | Seq Charge Xcor Delta Probability PepHits                      |                          |          |               |                            |                                |
|       | EVEELEQLTQQLMQDMEHPQR                                          | +3                       | 3.241    | 0.187         | 0.9682                     | 2                              |
|       | EKVSSIDLEIDSLSSLLDDMTKNDPFK                                    | +3                       | 5.699    | 0.558         | 1.0000                     | 5                              |
|       | QHPLPPPAQNQNQVR                                                | +3                       | 5.901    | 0.548         | 1.0000                     | 20                             |
|       | VNPFRRPGDSESPVAAGAQR                                           | +2                       | 5.114    | 0.479         | 1.0000                     | 19                             |
|       | APSSSQPPPQPQAK                                                 | +2                       | 3.535    | 0.485         | 0.9955                     | 15                             |
|       | PHVQPQSVSSANTQPR                                               | +2                       | 5.213    | 0.587         | 1.0000                     | 6                              |
|       | GPLSQAPTPAPK                                                   | +2                       | 3.649    | 0.561         | 1.0000                     | 7                              |
|       | SVPLEAPSSVGTGSPQPPSFTYAQQK                                     | +3                       | 2.797    | 0.446         | 0.9999                     | 3                              |
|       | MASCOT:(PepMatched Observed.Hits Coverage)                     |                          |          | 7             | 12                         | 18.7%                          |
|       | Seq Charge ObservedMS ExpectedMS CalculatedMS Pepscore PepHits |                          |          |               |                            |                                |
|       | SPGGPGPLTLK                                                    | +2                       | 512.29   | 1022.57       | 1022.58                    | 0 60 10                        |
|       | GPLSQAPTPAPK                                                   | +2                       | 582.33   | 1162.64       | 1162.63                    | 0.01 74 9                      |
|       | FSPGAPSGPGPQPSQK                                               | +2                       | 769.88   | 1537.75       | 1537.75                    | 0 66 2                         |
|       | QHPLPPPAQNQNQVR                                                | +3                       | 575.31   | 1722.89       | 1722.89                    | 0 66 2                         |
|       | VNPFRRPGDSESPVAAGAQR                                           | +3                       | 652.33   | 1953.96       | 1953.97                    | 0 63 7                         |
|       | SVPLEAPSSVGTGSPQPPSFTYAQQK                                     | +3                       | 887.45   | 2659.32       | 2659.31                    | 0.01 43 4                      |
|       | EVEELEQLTQQLMQDMEHPQR                                          | +3                       | 871.08   | 2610.20       | 2610.21                    | 0 66 6                         |
| No.   | Protein                                                        | Matched (SEQUEST MASCOT) | emPAI    | Strategy.Hits | PepMatched(SEQUEST MASCOT) | SpectraMatched(SEQUEST MASCOT) |

Identified Human Platelet Proteins

|       |                                                         |                          |            |               |                            |                                |      |                  |    |
|-------|---------------------------------------------------------|--------------------------|------------|---------------|----------------------------|--------------------------------|------|------------------|----|
| 69.   | IPI00326838                                             | Y                        | Y          | 0.26          | 1                          | 3                              | 4    | 6                | 17 |
| *Des: | Signal transducer and activator of transcription 5B     |                          |            |               |                            |                                |      |                  |    |
|       | SEQUEST:(PepMatched Observed.Hits Coverage)             |                          |            | 3             | 1                          | 6.12%                          |      |                  |    |
|       | Seq                                                     | Charge                   | Xcor       | Delta         | Probility                  | PepHits                        |      |                  |    |
|       | IQAQFAQLAQLNPQER                                        |                          | +2         | 4.466         | 0.362                      | 0.9996                         | 3    |                  |    |
|       | ATQLLEGLVQELQK +2                                       |                          | 3.563      | 0.356         | 0.9987                     | 2                              |      |                  |    |
|       | NYTFWQWFDGVMVLELK                                       |                          | +2         | 4.184         | 0.569                      | 1.0000                         | 2    |                  |    |
|       | MASCOT:(PepMatched Observed.Hits Coverage)              |                          |            | 4             | 1                          | 7.12%                          |      |                  |    |
|       | Seq                                                     | Charge                   | ObservedMS | ExpectedMS    | CalculatedMS               |                                |      | Pepscore PepHits |    |
|       | LGHYATQLQNTYDR +2                                       |                          | 840.41     | 1678.82       | 1678.81                    | 0.01                           | 55   | 6                |    |
|       | IQAQFAQLAQLNPQER                                        |                          | +2         | 928.00        | 1853.99                    | 1853.97                        | 0.02 | 89 3             |    |
|       | LAEIWQNR                                                |                          | +2         | 571.82        | 1141.63                    | 1141.62                        | 0.01 | 59 12            |    |
|       | FSDSEIGGITIAWK                                          |                          | +2         | 762.39        | 1522.77                    | 1522.77                        | 0    | 59 1             |    |
| No.   | Protein                                                 | Matched (SEQUEST MASCOT) | emPAI      | Strategy.Hits | PepMatched(SEQUEST MASCOT) | SpectraMatched(SEQUEST MASCOT) |      |                  |    |
| 70.   | IPI00368072                                             | N                        | Y          | 0.35          | 1                          | 0                              | 2    | 0                | 2  |
| *Des: | PREDICTED: similar to phosphoserine aminotransferase 1  |                          |            |               |                            |                                |      |                  |    |
|       | SEQUEST:(PepMatched Observed.Hits Coverage)             |                          |            | 2             | 1                          | 7.92%                          |      |                  |    |
|       | MASCOT:(PepMatched Observed.Hits Coverage)              |                          |            | 2             | 1                          | 7.92%                          |      |                  |    |
|       | Seq                                                     | Charge                   | ObservedMS | ExpectedMS    | CalculatedMS               |                                |      | Pepscore PepHits |    |
|       | IISNTENLVR                                              |                          | +2         | 579.83        | 1157.65                    | 1157.64                        | 0.01 | 43 1             |    |
|       | ASLYNAVTTEDVEK                                          |                          | +2         | 770.39        | 1538.76                    | 1538.75                        | 0.01 | 65 1             |    |
| No.   | Protein                                                 | Matched (SEQUEST MASCOT) | emPAI      | Strategy.Hits | PepMatched(SEQUEST MASCOT) | SpectraMatched(SEQUEST MASCOT) |      |                  |    |
| 71.   | IPI00365813                                             | Y                        | N          | 0.38          | 1                          | 2                              | 0    | 3                | 0  |
| *Des: | PREDICTED: similar to voltage-dependent anion channel 1 |                          |            |               |                            |                                |      |                  |    |
|       | SEQUEST:(PepMatched Observed.Hits Coverage)             |                          |            | 2             | 1                          | 8.82%                          |      |                  |    |
|       | Seq                                                     | Charge                   | Xcor       | Delta         | Probility                  | PepHits                        |      |                  |    |
|       | VNSSLIGLGYTQTLKPGIK                                     |                          | +2         | 3.623         | 0.473                      | 0.9994                         | 2    |                  |    |
|       | VNSSLIGLGYTQTLK                                         |                          | +2         | 4.234         | 0.486                      | 0.9990                         | 2    |                  |    |
|       | MASCOT:(PepMatched Observed.Hits Coverage)              |                          |            | 2             | 1                          | 7.11%                          |      |                  |    |
| No.   | Protein                                                 | Matched (SEQUEST MASCOT) | emPAI      | Strategy.Hits | PepMatched(SEQUEST MASCOT) | SpectraMatched(SEQUEST MASCOT) |      |                  |    |
| 72.   | IPI00197344                                             | Y                        | Y          | 0.43          | 1                          | 3                              | 2    | 5                | 2  |
| *Des: | Monoglyceride lipase                                    |                          |            |               |                            |                                |      |                  |    |
|       | SEQUEST:(PepMatched Observed.Hits Coverage)             |                          |            | 3             | 1                          | 13.26%                         |      |                  |    |
|       | Seq                                                     | Charge                   | Xcor       | Delta         | Probility                  | PepHits                        |      |                  |    |
|       | DLLQHVNTVQK                                             |                          | +2         | 3.541         | 0.404                      | 0.9992                         | 2    |                  |    |
|       | GAYLLMESSPSQDK +2                                       |                          | 3.076      | 0.394         | 0.9966                     | 2                              |      |                  |    |
|       | LLNFVLPNISLGR                                           |                          | +2         | 3.090         | 0.414                      | 0.9978                         | 1    |                  |    |
|       | MASCOT:(PepMatched Observed.Hits Coverage)              |                          |            | 2             | 1                          | 7.11%                          |      |                  |    |
|       | Seq                                                     | Charge                   | ObservedMS | ExpectedMS    | CalculatedMS               |                                |      | Pepscore PepHits |    |
|       | DLLQHVNTVQK                                             |                          | +2         | 647.86        | 1293.71                    | 1293.70                        | 0.01 | 52 2             |    |
|       | YDELAQMLK                                               |                          | +2         | 555.78        | 1109.54                    | 1109.54                        | 0    | 42 2             |    |
| No.   | Protein                                                 | Matched (SEQUEST MASCOT) | emPAI      | Strategy.Hits | PepMatched(SEQUEST MASCOT) | SpectraMatched(SEQUEST MASCOT) |      |                  |    |
| 73.   | IPI00373764                                             | N                        | Y          | 0.13          | 1                          | 0                              | 3    | 0                | 6  |

**Identified Human Platelet Proteins**

|              |                                                                                      |                                 |                   |                      |                                   |                                       |     |    |    |  |
|--------------|--------------------------------------------------------------------------------------|---------------------------------|-------------------|----------------------|-----------------------------------|---------------------------------------|-----|----|----|--|
| <b>*Des:</b> | <b>PREDICTED: similar to mKIAA1601 protein</b>                                       |                                 |                   |                      |                                   |                                       |     |    |    |  |
|              | <b>SEQUEST:(PepMatched Observed.Hits Coverage)</b>                                   |                                 |                   |                      |                                   |                                       |     |    |    |  |
|              | <b>MASCOT:(PepMatched Observed.Hits Coverage)</b>                                    | <b>3</b>                        | <b>1</b>          | <b>2.94%</b>         |                                   |                                       |     |    |    |  |
|              | <b>Seq</b>                                                                           | <b>Charge</b>                   | <b>ObservedMS</b> | <b>ExpectedMS</b>    | <b>CalculatedMS</b>               | <b>Pepscore PepHits</b>               |     |    |    |  |
|              | ELVEAQELAR                                                                           | +2                              | 579.31            | 1156.61              | 1156.61                           | 0                                     | 47  | 4  |    |  |
|              | ENVLLSSELQR                                                                          | +2                              | 644.35            | 1286.69              | 1286.68                           | 0.01                                  | 47  | 1  |    |  |
|              | IEALQADNDFTNER                                                                       | +2                              | 818.39            | 1634.76              | 1634.75                           | 0.01                                  | 86  | 1  |    |  |
|              |                                                                                      |                                 |                   |                      |                                   |                                       |     |    |    |  |
| <b>No.</b>   | <b>Protein</b>                                                                       | <b>Matched (SEQUEST MASCOT)</b> | <b>emPAI</b>      | <b>Strategy.Hits</b> | <b>PepMatched(SEQUEST MASCOT)</b> | <b>SpectraMatched(SEQUEST MASCOT)</b> |     |    |    |  |
| <b>74.</b>   | IPI00372027                                                                          | Y                               | Y                 | 0.55                 | 1                                 | 3                                     | 4   | 13 | 12 |  |
| <b>*Des:</b> | <b>PREDICTED: similar to coiled-coil-helix-coiled-coil-helix domain containing 3</b> |                                 |                   |                      |                                   |                                       |     |    |    |  |
|              | <b>SEQUEST:(PepMatched Observed.Hits Coverage)</b>                                   |                                 |                   |                      |                                   |                                       |     |    |    |  |
|              |                                                                                      | <b>3</b>                        | <b>1</b>          | <b>12.08%</b>        |                                   |                                       |     |    |    |  |
|              | <b>Seq</b>                                                                           | <b>Charge</b>                   | <b>Xcor</b>       | <b>Delta</b>         | <b>Probility</b>                  | <b>PepHits</b>                        |     |    |    |  |
|              | VAEELALEQAK                                                                          | +2                              | 4.068             | 0.406                | 0.9999                            | 10                                    |     |    |    |  |
|              | YSSVYGASVSDEELK                                                                      | +2                              | 4.361             | 0.529                | 1.0000                            | 3                                     |     |    |    |  |
|              | VTFEADENENITVVK                                                                      | +2                              | 4.689             | 0.493                | 1.0000                            | 3                                     |     |    |    |  |
|              | <b>MASCOT:(PepMatched Observed.Hits Coverage)</b>                                    | <b>4</b>                        | <b>2</b>          | <b>14.56%</b>        |                                   |                                       |     |    |    |  |
|              | <b>Seq</b>                                                                           | <b>Charge</b>                   | <b>ObservedMS</b> | <b>ExpectedMS</b>    | <b>CalculatedMS</b>               | <b>Pepscore PepHits</b>               |     |    |    |  |
|              | LSENVDR                                                                              | +2                              | 473.26            | 944.50               | 944.49                            | 0.01                                  | 53  | 3  |    |  |
|              | VAEELALEQAK                                                                          | +2                              | 600.83            | 1199.65              | 1199.64                           | 0.01                                  | 97  | 9  |    |  |
|              | YSSVYGASVSDEELK                                                                      | +2                              | 817.39            | 1632.76              | 1632.75                           | 0.01                                  | 97  | 97 | 3  |  |
|              | VTFEADENENITVVK                                                                      | +2                              | 854.43            | 1706.85              | 1706.84                           | 0.01                                  | 72  | 3  |    |  |
|              |                                                                                      |                                 |                   |                      |                                   |                                       |     |    |    |  |
| <b>No.</b>   | <b>Protein</b>                                                                       | <b>Matched (SEQUEST MASCOT)</b> | <b>emPAI</b>      | <b>Strategy.Hits</b> | <b>PepMatched(SEQUEST MASCOT)</b> | <b>SpectraMatched(SEQUEST MASCOT)</b> |     |    |    |  |
| <b>75.</b>   | IPI00195673                                                                          | Y                               | Y                 | 0.48                 | 4                                 | 9                                     | 2   | 91 | 6  |  |
| <b>*Des:</b> | <b>PREDICTED: similar to Tubulin, beta 6</b>                                         |                                 |                   |                      |                                   |                                       |     |    |    |  |
|              | <b>SEQUEST:(PepMatched Observed.Hits Coverage)</b>                                   |                                 |                   |                      |                                   |                                       |     |    |    |  |
|              |                                                                                      | <b>9</b>                        | <b>9</b>          | <b>31.42%</b>        |                                   |                                       |     |    |    |  |
|              | <b>Seq</b>                                                                           | <b>Charge</b>                   | <b>Xcor</b>       | <b>Delta</b>         | <b>Probility</b>                  | <b>PepHits</b>                        |     |    |    |  |
|              | EVDEQMLAIQNK                                                                         | +2                              | 3.292             | 0.252                | 0.9922                            | 1                                     |     |    |    |  |
|              | FPGQLNADLR                                                                           | +2                              | 2.943             | 0.353                | 0.9980                            | 9                                     |     |    |    |  |
|              | IMNTFSVMPSPK                                                                         | +2                              | 4.472             | 0.580                | 1.0000                            | 3                                     |     |    |    |  |
|              | KLAVNMVPFPR                                                                          | +2                              | 3.160             | 0.461                | 0.9997                            | 1                                     |     |    |    |  |
|              | NSSYFVEWIPNNVK                                                                       | +2                              | 4.550             | 0.448                | 0.9999                            | 5                                     |     |    |    |  |
|              | ALTVPELTQQMFDK                                                                       | +2                              | 4.159             | 0.553                | 1.0000                            | 4                                     |     |    |    |  |
|              | GHYTEGAELVDSVLDVVR                                                                   | +2                              | 7.165             | 0.599                | 1.0000                            | 4                                     |     |    |    |  |
|              | MASTFIGNSTAIQELFK                                                                    | +2                              | 5.435             | 0.421                | 0.9631                            | 2                                     |     |    |    |  |
|              | LTTPTYGDLNHLVSATMSGVTTSLR                                                            | +3                              | 4.059             | 0.610                | 1.0000                            | 1                                     |     |    |    |  |
|              | <b>MASCOT:(PepMatched Observed.Hits Coverage)</b>                                    | <b>2</b>                        | <b>2</b>          | <b>9.67%</b>         |                                   |                                       |     |    |    |  |
|              | <b>Seq</b>                                                                           | <b>Charge</b>                   | <b>ObservedMS</b> | <b>ExpectedMS</b>    | <b>CalculatedMS</b>               | <b>Pepscore PepHits</b>               |     |    |    |  |
|              | MASTFIGNSTAIQELFK                                                                    | +2                              | 929.48            | 1856.94              | 1856.93                           | 0.01                                  | 115 | 3  |    |  |
|              | LTTPTYGDLNHLVSATMSGVTTSLR                                                            | +3                              | 879.12            | 2634.35              | 2634.33                           | 0.02                                  | 51  | 1  |    |  |
|              |                                                                                      |                                 |                   |                      |                                   |                                       |     |    |    |  |
| <b>No.</b>   | <b>Protein</b>                                                                       | <b>Matched (SEQUEST MASCOT)</b> | <b>emPAI</b>      | <b>Strategy.Hits</b> | <b>PepMatched(SEQUEST MASCOT)</b> | <b>SpectraMatched(SEQUEST MASCOT)</b> |     |    |    |  |
| <b>76.</b>   | IPI00204261                                                                          | Y                               | Y                 | 0.44                 | 2                                 | 8                                     | 6   | 10 | 7  |  |
| <b>*Des:</b> | <b>Importin beta-1 subunit</b>                                                       |                                 |                   |                      |                                   |                                       |     |    |    |  |
|              | <b>SEQUEST:(PepMatched Observed.Hits Coverage)</b>                                   |                                 |                   |                      |                                   |                                       |     |    |    |  |
|              |                                                                                      | <b>8</b>                        | <b>2</b>          | <b>16.04%</b>        |                                   |                                       |     |    |    |  |
|              | <b>Seq</b>                                                                           | <b>Charge</b>                   | <b>Xcor</b>       | <b>Delta</b>         | <b>Probility</b>                  | <b>PepHits</b>                        |     |    |    |  |

Identified Human Platelet Proteins

| Seq                                        | Charge | ObservedMS | ExpectedMS | CalculatedMS | Pepscore | PepHits |
|--------------------------------------------|--------|------------|------------|--------------|----------|---------|
| LQQVLQMESHQSTSDR                           | +3     | 4.063      | 0.601      | 1.0000       | 2        |         |
| LAATNALLNSLEFTK                            | +2     | 5.255      | 0.528      | 1.0000       | 2        |         |
| YMEAFKPFGLGIGLK                            | +2     | 2.827      | 0.342      | 0.9914       | 2        |         |
| SDFDMVDYLNELR                              | +2     | 3.349      | 0.418      | 0.9994       | 1        |         |
| SNEILTAIQGMR                               | +3     | 2.758      | 0.381      | 0.9991       | 2        |         |
| AAVENLPTFLVELSR                            | +2     | 4.233      | 0.384      | 0.9996       | 1        |         |
| GALQYLVPILTQTLTK                           | +2     | 3.323      | 0.393      | 0.9987       | 2        |         |
| MFQSTAGSGGVQEDALMAVSTLVEVLGGEFLK           | +3     | 5.270      | 0.542      | 1.0000       | 1        |         |
| MASCOT:(PepMatched Observed.Hits Coverage) |        | 6          | 2          | 10.43%       |          |         |
| Seq                                        | Charge | ObservedMS | ExpectedMS | CalculatedMS | Pepscore | PepHits |
| TVSPDRLELEAAQK                             | +2     | 778.92     | 1555.82    | 1555.82      | 0        | 45      |
| LQQVLQMESHQSTSDR                           | +3     | 667.34     | 1998.98    | 1998.98      | 0        | 45      |
| LAATNALLNSLEFTK                            | +2     | 803.45     | 1604.89    | 1604.88      | 0.01     | 105     |
| SNEILTAIQGMR                               | +3     | 482.60     | 1444.77    | 1444.77      | 0        | 43      |
| SDFDMVDYLNELR                              | +2     | 808.87     | 1615.72    | 1615.72      | 0        | 59      |
| AAVENLPTFLVELSR                            | +2     | 829.97     | 1657.92    | 1657.90      | 0.02     | 69      |

No. 77. Protein IPI00195678 Matched (SEQUEST MASCOT) Y Y emPAI Strategy.Hits 0.36 4 8 8 27 61 PepMatched(SEQUEST MASCOT) SpectraMatched(SEQUEST MASCOT)

\*Des: Platelet glycoprotein V precursor

| Seq                                         | Charge | Xcor       | Delta      | Probility    | PepHits  |         |
|---------------------------------------------|--------|------------|------------|--------------|----------|---------|
| SEQUEST:(PepMatched Observed.Hits Coverage) |        | 8          | 9          | 21.31%       |          |         |
| LMSLDSGLLANLGALTELR                         | +2     | 5.573      | 0.550      | 1.0000       | 10       |         |
| MVLLLEQLFLDHNALR                            | +2     | 5.529      | 0.507      | 1.0000       | 13       |         |
| LTLFENPLEELPEVLFEGEMAGLR                    | +3     | 5.522      | 0.583      | 1.0000       | 4        |         |
| LMLSDSHISAIDPGTFNDLVK                       | +2     | 3.390      | 0.402      | 0.9986       | 3        |         |
| LMSLDSGLLANLGALTELR                         | +3     | 4.192      | 0.480      | 1.0000       | 3        |         |
| TLPGDVFAALPQLTR                             | +3     | 2.925      | 0.401      | 0.9999       | 5        |         |
| AILDKMLLEQLFLDHNALR                         | +3     | 6.158      | 0.543      | 1.0000       | 3        |         |
| GVLQSHSFGMTVLQR                             | +2     | 4.394      | 0.307      | 0.9986       | 3        |         |
| MASCOT:(PepMatched Observed.Hits Coverage)  |        | 8          | 9          | 16.63%       |          |         |
| Seq                                         | Charge | ObservedMS | ExpectedMS | CalculatedMS | Pepscore | PepHits |
| LMSLDSGLLANLGALTELR                         | +2     | 994.0585   | 1986.1024  | 1986.0819    | 0.02     | 105     |
| DLQNLQFK                                    | +2     | 560.7892   | 1119.5638  | 1119.5560    | 0.01     | 44      |
| MVLLLEQLFLDHNALR                            | +2     | 906.5040   | 1810.9934  | 1810.9763    | 0.02     | 91      |
| LMSLDSGLLANLGALTELR                         | +3     | 795.7797   | 2384.3172  | 2384.3096    | 0.01     | 63      |
| TLPGDVFAALPQLTR                             | +2     | 799.9541   | 1597.8937  | 1597.8828    | 0.01     | 63      |
| AILDKMLLEQLFLDHNALR                         | +3     | 785.1173   | 2352.3301  | 2351.3035    | 1.03     | 81      |
| GVLQSHSFGMTVLQR                             | +2     | 873.9680   | 1745.9214  | 1745.8882    | 0.03     | 63      |
| NKISHLPR                                    | +2     | 482.7908   | 963.5671   | 963.5614     | 0.01     | 45      |

No. 78. Protein IPI00203390 Matched (SEQUEST MASCOT) Y N emPAI Strategy.Hits 0.19 1 2 0 2 0 PepMatched(SEQUEST MASCOT) SpectraMatched(SEQUEST MASCOT)

\*Des: Serine/threonine protein phosphatase PP1-beta catalytic subunit

| Seq                                         | Charge | Xcor  | Delta | Probility | PepHits |
|---------------------------------------------|--------|-------|-------|-----------|---------|
| SEQUEST:(PepMatched Observed.Hits Coverage) |        | 2     | 1     | 7.5%      |         |
| IVQMTEAEVR                                  | +2     | 2.896 | 0.462 | 0.9994    | 1       |

Identified Human Platelet Proteins

GVSFTFGADVVS **K** +2 2.953 0.424 0.9985 1  
 MASCOT:(PepMatched Observed.Hits Coverage)

No. Protein Matched (SEQUEST MASCOT) emPAI Strategy.Hits PepMatched(SEQUEST MASCOT) SpectraMatched(SEQUEST MASCOT)  
 79. IPI00556943 Y N 0.07 1 2 0 3 0  
 \*Des: PREDICTED: similar to AP2 associated kinase 1  
 SEQUEST:(PepMatched Observed.Hits Coverage) 2 1 2.45%  
 Seq Charge Xcor Delta Proability PepHits  
 AQATPSQPLQSSQPK +2 3.583 0.347 0.9977 2  
 VQTTTPPTIQGQK +2 2.704 0.272 0.9689 1  
 MASCOT:(PepMatched Observed.Hits Coverage)

No. Protein Matched (SEQUEST MASCOT) emPAI Strategy.Hits PepMatched(SEQUEST MASCOT) SpectraMatched(SEQUEST MASCOT)  
 80. IPI00567369 N Y 1.6 3 0 6 0 66  
 \*Des: Tropomyosin isoform 6  
 SEQUEST:(PepMatched Observed.Hits Coverage)  
 MASCOT:(PepMatched Observed.Hits Coverage) 6 4 21.73%  
 Seq Charge ObservedMS ExpectedMS CalculatedMS Pepscore PepHits  
 EQAEAEVASLNR +2 658.83 1315.64 1315.64 0 67 27  
 AREQAEAEVASLNR +2 772.40 1542.78 1542.77 0.01 80 4  
 IQVLQQQADDAEER +2 821.91 1641.80 1641.80 0 105 16  
 KIQVLQQQADDAEER +2 885.96 1769.90 1769.89 0.01 107 10  
 TIDDLEDKLK +2 595.32 1188.63 1188.62 0.01 67 18  
 MLDQTLDDL NEM +2 718.34 1434.68 1434.67 0.01 72 4

No. Protein Matched (SEQUEST MASCOT) emPAI Strategy.Hits PepMatched(SEQUEST MASCOT) SpectraMatched(SEQUEST MASCOT)  
 81. IPI00324302 Y Y 0.38 3 3 4 8 9  
 \*Des: Acetyl-CoA acetyltransferase, mitochondrial precursor  
 SEQUEST:(PepMatched Observed.Hits Coverage) 3 2 11.57%  
 Seq Charge Xcor Delta Proability PepHits  
 EYMGNVIQGGEGQAPTR +2 4.959 0.476 1.0000 1  
 LGTIAIQGAIEK +2 2.927 0.368 0.9974 2  
 TPIGSFLGSLASQPATK +2 4.538 0.623 1.0000 5  
 MASCOT:(PepMatched Observed.Hits Coverage) 4 3 13.65%  
 Seq Charge ObservedMS ExpectedMS CalculatedMS Pepscore PepHits  
 EYMGNVIQGGEGQAPTR +2 953.46 1904.91 1904.90 0.01 90 1  
 AGIPKEEVKEVYMGNVIQGGEGQAPTR +3 953.46 2857.37 2856.44 0.93 43 1  
 LGTIAIQGAIEK +2 607.37 1212.72 1212.71 0.01 50 2  
 TPIGSFLGSLASQPATK +2 837.96 1673.91 1673.90 0.01 111 5

No. Protein Matched (SEQUEST MASCOT) emPAI Strategy.Hits PepMatched(SEQUEST MASCOT) SpectraMatched(SEQUEST MASCOT)  
 82. IPI00201792 Y Y 0.18 3 2 5 24 25  
 \*Des: Protein kinase C, alpha type  
 SEQUEST:(PepMatched Observed.Hits Coverage) 2 7 5.56%  
 Seq Charge Xcor Delta Proability PepHits  
 LLNQEEGEYYNVPIPEGDEEGNVELR +3 4.114 0.412 1.0000 2  
 LSVEIWDWDR +2 3.641 0.476 0.9999 2

**Identified Human Platelet Proteins**

|       |                                             |                          |              |               |                            |                                |   |   |    |          |         |
|-------|---------------------------------------------|--------------------------|--------------|---------------|----------------------------|--------------------------------|---|---|----|----------|---------|
|       | MASCOT:(PepMatched Observed.Hits Coverage)  | 5                        | 6            | 11.71%        |                            |                                |   |   |    |          |         |
|       | Seq Charge ObservedMS                       | ExpectedMS               | CalculatedMS |               |                            |                                |   |   |    | PepScore | PepHits |
|       | LDNVMLDSEGHK +2                             | 735.87                   | 1469.72      | 1469.72       | 0                          | 55                             | 6 |   |    |          |         |
|       | STLN PQWNESFTFK +2                          | 849.91                   | 1697.81      | 1697.80       | 0.01                       | 64                             | 2 |   |    |          |         |
|       | LSVEIWDWDR +2                               | 660.38                   | 1318.74      | 1317.64       | 1.1                        | 53                             | 2 |   |    |          |         |
|       | NDFMGSLSFGVSELMK +2                         | 881.41                   | 1760.81      | 1760.81       | 0                          | 76                             | 5 |   |    |          |         |
|       | LYFVMEYVNGGDL MYHIQVVGK +3                  | 869.09                   | 2604.26      | 2603.26       | 1                          | 41                             | 4 |   |    |          |         |
| No.   | Protein                                     | Matched (SEQUEST MASCOT) | emPAI        | Strategy.Hits | PepMatched(SEQUEST MASCOT) | SpectraMatched(SEQUEST MASCOT) |   |   |    |          |         |
| 83.   | IPI00200054                                 | Y                        | Y            | 0.32          | 2                          | 4                              | 5 | 8 | 6  |          |         |
| *Des: | Cytoplasmic aminopeptidase P                |                          |              |               |                            |                                |   |   |    |          |         |
|       | SEQUEST:(PepMatched Observed.Hits Coverage) | 4                        | 1            | 9.77%         |                            |                                |   |   |    |          |         |
|       | Seq Charge Xcor Delta                       | Proability               | PepHits      |               |                            |                                |   |   |    |          |         |
|       | IENVVLVPAK +2                               | 3.258                    | 0.386        | 0.9988        | 2                          |                                |   |   |    |          |         |
|       | GHIAVSAAVFP TGK +2                          | 4.356                    | 0.590        | 1.0000        | 3                          |                                |   |   |    |          |         |
|       | GSLTFEPLTLVPIQTK +2                         | 4.637                    | 0.480        | 1.0000        | 3                          |                                |   |   |    |          |         |
|       | SAGHHLVPV KENLVDK +3                        | 3.541                    | 0.274        | 0.9970        | 3                          |                                |   |   |    |          |         |
|       | MASCOT:(PepMatched Observed.Hits Coverage)  | 5                        | 2            | 11.82%        |                            |                                |   |   |    |          |         |
|       | Seq Charge ObservedMS                       | ExpectedMS               | CalculatedMS |               |                            |                                |   |   |    | PepScore | PepHits |
|       | ASYAVSEAIPK +2                              | 568.30                   | 1134.59      | 1134.59       | 0                          | 43                             | 2 |   |    |          |         |
|       | IENVVLVPAK +2                               | 590.87                   | 1179.72      | 1179.72       | 0                          | 42                             | 2 |   |    |          |         |
|       | GHIAVSAAVFP TGK +2                          | 728.40                   | 1454.79      | 1454.79       | 0                          | 66                             | 1 |   |    |          |         |
|       | GSLTFEPLTLVPIQTK +2                         | 872.50                   | 1742.98      | 1742.98       | 0                          | 72                             | 2 |   |    |          |         |
|       | TLSLDEVYLIDSGAQYK +2                        | 957.99                   | 1913.97      | 1913.96       | 0.01                       | 99                             | 2 |   |    |          |         |
| No.   | Protein                                     | Matched (SEQUEST MASCOT) | emPAI        | Strategy.Hits | PepMatched(SEQUEST MASCOT) | SpectraMatched(SEQUEST MASCOT) |   |   |    |          |         |
| 84.   | IPI00325975                                 | Y                        | N            | 1.15          | 1                          | 2                              | 0 | 2 | 0  |          |         |
| *Des: | Vesicle-associated membrane protein 8       |                          |              |               |                            |                                |   |   |    |          |         |
|       | SEQUEST:(PepMatched Observed.Hits Coverage) | 2                        | 1            | 34.31%        |                            |                                |   |   |    |          |         |
|       | Seq Charge Xcor Delta                       | Proability               | PepHits      |               |                            |                                |   |   |    |          |         |
|       | NLQSEVEGVKNIMTQNVER +3                      | 3.655                    | 0.544        | 0.9983        | 1                          |                                |   |   |    |          |         |
|       | NKTEDLEATSEHFK +3                           | 3.319                    | 0.517        | 0.9975        | 1                          |                                |   |   |    |          |         |
|       | MASCOT:(PepMatched Observed.Hits Coverage)  |                          |              |               |                            |                                |   |   |    |          |         |
| No.   | Protein                                     | Matched (SEQUEST MASCOT) | emPAI        | Strategy.Hits | PepMatched(SEQUEST MASCOT) | SpectraMatched(SEQUEST MASCOT) |   |   |    |          |         |
| 85.   | IPI00554194                                 | N                        | Y            | 1.42          | 1                          | 0                              | 5 | 0 | 12 |          |         |
| *Des: | PREDICTED: hypothetical protein XP_346694   |                          |              |               |                            |                                |   |   |    |          |         |
|       | SEQUEST:(PepMatched Observed.Hits Coverage) |                          |              |               |                            |                                |   |   |    |          |         |
|       | MASCOT:(PepMatched Observed.Hits Coverage)  | 5                        | 1            | 28.03%        |                            |                                |   |   |    |          |         |
|       | Seq Charge ObservedMS                       | ExpectedMS               | CalculatedMS |               |                            |                                |   |   |    | PepScore | PepHits |
|       | MADKDGDLIATK +2                             | 639.33                   | 1276.64      | 1276.63       | 0.01                       | 50                             | 4 |   |    |          |         |
|       | SFDQLTPEESKER +2                            | 783.38                   | 1564.74      | 1564.74       | 0                          | 53                             | 3 |   |    |          |         |
|       | DIVVQETMEDIDK +2                            | 767.87                   | 1533.73      | 1533.72       | 0.01                       | 57                             | 4 |   |    |          |         |
|       | MDKEETKDWILPSDYDHAEAEAR +3                  | 917.09                   | 2748.26      | 2748.23       | 0.03                       | 62                             | 2 |   |    |          |         |
|       | EEIVDKYDLFVGSQATDFGEALVR +3                 | 901.12                   | 2700.33      | 2700.33       | 0                          | 46                             | 6 |   |    |          |         |
| No.   | Protein                                     | Matched (SEQUEST MASCOT) | emPAI        | Strategy.Hits | PepMatched(SEQUEST MASCOT) | SpectraMatched(SEQUEST MASCOT) |   |   |    |          |         |

Identified Human Platelet Proteins

86. IPI00393158 N Y 0.33 1 0 4 0 24

\*Des: 33 kDa protein

SEQUEST:(PepMatched Observed.Hits Coverage)

| MASCOT:(PepMatched Observed.Hits Coverage) |        | 4          | 1          | 12.45%       |                  |    |    |
|--------------------------------------------|--------|------------|------------|--------------|------------------|----|----|
| Seq                                        | Charge | ObservedMS | ExpectedMS | CalculatedMS | Pepscore PepHits |    |    |
| MELQEIQLK                                  | +2     | 566.31     | 1130.60    | 1130.60      | 0                | 74 | 8  |
| LVIIEGDLR                                  | +2     | 578.77     | 1155.52    | 1155.65      | -0.12            | 50 | 10 |
| KLVIIEGDLR                                 | +2     | 642.88     | 1283.75    | 1283.74      | 0.01             | 66 | 16 |
| TIDDLEDELYAQK                              | +2     | 776.87     | 1551.73    | 1551.73      | 0                | 71 | 2  |

No. Protein Matched (SEQUEST MASCOT) emPAI Strategy.Hits PepMatched(SEQUEST MASCOT) SpectraMatched(SEQUEST MASCOT)  
87. IPI00480639 Y Y 0.05 1 3 2 3 3

\*Des: Complement C3 precursor

| SEQUEST:(PepMatched Observed.Hits Coverage) |        | 3          | 1          | 3.9%         |                  |    |   |
|---------------------------------------------|--------|------------|------------|--------------|------------------|----|---|
| Seq                                         | Charge | Xcor       | Delta      | Probability  | PepHits          |    |   |
| VHQFFNVGLIQPGSVK                            | +3     |            | 4.109      | 0.267        | 0.9984           | 2  |   |
| LTTIELSDDFDEYIMTIEQVIK                      | +3     |            | 4.088      | 0.348        | 0.9994           | 1  |   |
| WEEPGQQLYNVEATSYALLALLLLK                   | +3     |            | 4.073      | 0.448        | 0.9999           | 1  |   |
| MASCOT:(PepMatched Observed.Hits Coverage)  |        | 2          | 1          | 2.89%        |                  |    |   |
| Seq                                         | Charge | ObservedMS | ExpectedMS | CalculatedMS | Pepscore PepHits |    |   |
| LTTIELSDDFDEYIMTIEQVIK                      | +3     | 872.78     | 2615.31    | 2615.29      | 0.02             | 68 | 1 |
| WEEPGQQLYNVEATSYALLALLLLK                   | +3     | 954.86     | 2861.54    | 2861.52      | 0.02             | 59 | 2 |

No. Protein Matched (SEQUEST MASCOT) emPAI Strategy.Hits PepMatched(SEQUEST MASCOT) SpectraMatched(SEQUEST MASCOT)  
88. IPI00231013 Y Y 1.65 1 3 2 4 6

\*Des: Splice Isoform Short of Cytochrome b5

| SEQUEST:(PepMatched Observed.Hits Coverage) |        | 3          | 1          | 44.55%       |                  |    |   |
|---------------------------------------------|--------|------------|------------|--------------|------------------|----|---|
| Seq                                         | Charge | Xcor       | Delta      | Probability  | PepHits          |    |   |
| FLEEHPGGEEVLR                               | +2     | 3.827      | 0.508      | 0.9956       | 3                |    |   |
| TYIIGELHPDDRSK                              | +2     | 4.280      | 0.631      | 1.0000       | 3                |    |   |
| STWVILHHKVYDLTK                             | +3     | 2.724      | 0.465      | 0.9874       | 3                |    |   |
| MASCOT:(PepMatched Observed.Hits Coverage)  |        | 2          | 1          | 28.71%       |                  |    |   |
| Seq                                         | Charge | ObservedMS | ExpectedMS | CalculatedMS | Pepscore PepHits |    |   |
| FLEEHPGGEEVLR                               | +2     | 756.38     | 1510.75    | 1510.74      | 0.01             | 42 | 6 |
| TYIIGELHPDDRSK                              | +2     | 822.42     | 1642.84    | 1642.83      | 0.01             | 66 | 4 |

No. Protein Matched (SEQUEST MASCOT) emPAI Strategy.Hits PepMatched(SEQUEST MASCOT) SpectraMatched(SEQUEST MASCOT)  
89. IPI00187731 Y Y 1.75 4 11 9 36 51

\*Des: Splice Isoform 2 of Tropomyosin beta chain

| SEQUEST:(PepMatched Observed.Hits Coverage) |        | 11    | 11    | 32.17%      |         |  |  |
|---------------------------------------------|--------|-------|-------|-------------|---------|--|--|
| Seq                                         | Charge | Xcor  | Delta | Probability | PepHits |  |  |
| LEEAEKAADESER                               | +2     | 4.316 | 0.525 | 1.0000      | 6       |  |  |
| RIQLVEEELDRAQER                             | +3     | 4.035 | 0.420 | 1.0000      | 13      |  |  |
| LATALQKLEEAEEKAADESER                       | +2     | 5.275 | 0.639 | 1.0000      | 17      |  |  |
| LVILEGELER                                  | +2     | 3.163 | 0.449 | 0.9995      | 6       |  |  |
| QLEEEQALQK                                  | +2     | 2.909 | 0.321 | 0.9942      | 2       |  |  |
| QLVEEELDR                                   | +2     | 3.423 | 0.295 | 0.9974      | 2       |  |  |

Identified Human Platelet Proteins

| Seq              | Charge | ObservedMS | ExpectedMS | CalculatedMS | Pepscore | PepHits |
|------------------|--------|------------|------------|--------------|----------|---------|
| LEEAEKAADESERGMK | +2     | 666.83     | 1331.64    | 1331.63      | 0.01     | 94      |
| KATDAEADVASLNR   | +2     | 672.35     | 1342.68    | 1342.67      | 0.01     | 68      |
| RIQLVEEELDR      | +2     | 678.84     | 1355.66    | 1355.65      | 0.01     | 83      |
| LATALQKLEEA EK   | +2     | 575.29     | 1148.57    | 1148.56      | 0.01     | 50      |
| KLVI LEGELER     | +3     | 840.74     | 2519.20    | 2519.18      | 0.02     | 47      |
| KLVI LEGELER     | +3     | 433.60     | 1297.77    | 1297.76      | 0.01     | 57      |
| IQLVEEELDR       | +2     | 622.33     | 1242.65    | 1242.65      | 0        | 78      |
| RIQLVEEELDR      | +2     | 700.39     | 1398.76    | 1398.75      | 0.01     | 49      |
| TIDDLEETLASAK    | +2     | 703.36     | 1404.71    | 1404.70      | 0.01     | 94      |

No. 90. Protein IPI00231953 Matched (SEQUEST MASCOT) Y N emPAI 0.08 Strategy.Hits 1 PepMatched(SEQUEST MASCOT) 3 SpectraMatched(SEQUEST MASCOT) 0

\*Des: Coatomer protein complex, subunit beta 2

| Seq                                         | Charge | Xcor  | Delta | Probility | PepHits |
|---------------------------------------------|--------|-------|-------|-----------|---------|
| SEQUEST:(PepMatched Observed.Hits Coverage) |        |       |       |           | 6.94%   |
| AAESLADPTEYENLFPGLK                         | +2     | 4.175 | 0.431 | 0.9998    | 1       |
| FELALQLGELK                                 | +2     | 3.541 | 0.435 | 0.9998    | 1       |
| VLAAQETHEGVTEGDGIEDAFEVLGEIQEIVK            | +3     | 3.671 | 0.429 | 0.9998    | 2       |

MASCOT:(PepMatched Observed.Hits Coverage)

No. 91. Protein IPI00358464 Matched (SEQUEST MASCOT) Y Y emPAI 0.62 Strategy.Hits 1 PepMatched(SEQUEST MASCOT) 5 SpectraMatched(SEQUEST MASCOT) 6

\*Des: PREDICTED: similar to Deoxyribose-phosphate aldolase-like

| Seq                                         | Charge | Xcor   | Delta   | Probility | PepHits |     |
|---------------------------------------------|--------|--------|---------|-----------|---------|-----|
| SEQUEST:(PepMatched Observed.Hits Coverage) |        |        |         |           | 14.43%  |     |
| IPVASVATGFPAGQTHLK                          | +3     | 3.481  | 0.434   | 0.9995    | 1       |     |
| LAVEDGATEIDVVINR                            | +2     | 4.945  | 0.557   | 1.0000    | 2       |     |
| IGASSLLSDIER                                | +2     | 3.106  | 0.345   | 0.9952    | 1       |     |
| TILATGELGSLTNIYK                            | +2     | 5.042  | 0.602   | 1.0000    | 1       |     |
| EELGDEWLTPDLFR                              | +2     | 3.863  | 0.478   | 0.9997    | 1       |     |
| MASCOT:(PepMatched Observed.Hits Coverage)  |        |        |         |           | 15.86%  |     |
| LAVEDGATEIDVVINR                            | +2     | 857.46 | 1712.90 | 1712.89   | 0.01    | 79  |
| ESLVWLSLVK                                  | +2     | 587.35 | 1172.68 | 1172.68   | 0       | 50  |
| IGASSLLSDIER                                | +2     | 630.84 | 1259.67 | 1259.67   | 0       | 73  |
| TILATGELGSLTNIYK                            | +2     | 847.48 | 1692.94 | 1692.93   | 0.01    | 103 |
| ETVNATFPVAIVMLR                             | +2     | 831.46 | 1660.91 | 1659.90   | 1.01    | 56  |
| EELGDEWLTPDLFR                              | +2     | 860.42 | 1718.83 | 1718.82   | 0.01    | 63  |

No. Protein Matched (SEQUEST MASCOT) emPAI Strategy.Hits PepMatched(SEQUEST MASCOT) SpectraMatched(SEQUEST MASCOT)



Identified Human Platelet Proteins

92. IPI00231954 Y Y 0.38 2 2 9 4 13

\*Des: Phosphofructokinase, platelet

| SEQUEST:(PepMatched Observed.Hits Coverage) |        |            |            |              |          |         |    |   |  |
|---------------------------------------------|--------|------------|------------|--------------|----------|---------|----|---|--|
| Seq                                         | Charge | Xcor       | Delta      | Probability  | PepHits  |         |    |   |  |
| MGVEAVLALLEATPETPACVVSLR                    | +3     |            |            | 3.951        | 0.439    | 1.0000  | 1  |   |  |
| LAIKEPDDKIPK                                | +3     | 3.673      |            | 0.413        | 1.0000   | 6       |    |   |  |
| MASCOT:(PepMatched Observed.Hits Coverage)  |        |            |            |              |          |         |    |   |  |
| Seq                                         | Charge | ObservedMS | ExpectedMS | CalculatedMS | Pepscore | PepHits |    |   |  |
| SFEGNLNTYK                                  | +2     | 586.78     | 1171.55    | 1171.55      | 0        | 44      | 1  |   |  |
| YEASYDMSDVGK                                | +2     | 682.79     | 1363.56    | 1363.56      | 0        | 68      | 1  |   |  |
| DLQSNVMHLTEK                                | +2     | 707.85     | 1413.69    | 1413.69      | 0        | 61      | 1  |   |  |
| AIGVLTSGGDAQGMNAAVR                         | +2     | 894.46     | 1786.90    | 1786.90      | 0        | 105     | 6  |   |  |
| ELVVTNLGFDTR                                | +2     | 682.36     | 1362.71    | 1362.71      | 0        | 74      | 1  |   |  |
| MFAIYDGFDFGLANGQIK                          | +2     | 930.45     | 1858.89    | 1858.89      | 0        | 110     | 2  |   |  |
| IIEVVDAIMTTAQSHQR                           | +2     | 956.50     | 1910.99    | 1910.99      | 0        | 107     | 2  |   |  |
| TFVLEVMGR                                   | +2     | 526.28     | 1050.55    | 1050.55      | 0        | 50      | 6  |   |  |
| NINALLIIGGFEAYLGLLELAAAR                    | +3     |            | 839.15     | 2514.42      | 2514.42  | 0       | 74 | 1 |  |

No. Protein Matched (SEQUEST MASCOT) emPAI Strategy.Hits PepMatched(SEQUEST MASCOT) SpectraMatched(SEQUEST MASCOT)

93. IPI00231955 N Y 0.3 1 0 2 0 3

\*Des: Calmodulin

| SEQUEST:(PepMatched Observed.Hits Coverage) |        |            |            |              |           |         |    |   |  |
|---------------------------------------------|--------|------------|------------|--------------|-----------|---------|----|---|--|
| Seq                                         | Charge | ObservedMS | ExpectedMS | CalculatedMS | Pepscore  | PepHits |    |   |  |
| DTDSEEEIREAFR                               | +2     | 798.8605   | 1595.7064  | 1595.7063    | 0         | 39      | 1  |   |  |
| VFDKDGNGYISAAELR                            | +2     |            | 878.4319   | 1754.8492    | 1753.8634 | 0.99    | 89 | 3 |  |

No. Protein Matched (SEQUEST MASCOT) emPAI Strategy.Hits PepMatched(SEQUEST MASCOT) SpectraMatched(SEQUEST MASCOT)

94. IPI00209283 Y N 0.5 1 3 0 4 0

\*Des: Vesicle-associated membrane protein-associated protein B

| SEQUEST:(PepMatched Observed.Hits Coverage) |        |       |       |             |         |        |   |  |  |
|---------------------------------------------|--------|-------|-------|-------------|---------|--------|---|--|--|
| Seq                                         | Charge | Xcor  | Delta | Probability | PepHits |        |   |  |  |
| TEAPVAAKPLTSPLDAAEVKK                       | +3     |       |       | 3.955       | 0.459   | 0.9999 | 2 |  |  |
| ALPSNSPMAALAASGK                            | +2     |       |       | 2.794       | 0.487   | 0.9995 | 1 |  |  |
| GPFTDVVTTNLK                                | +2     | 3.388 |       | 0.409       | 0.9997  | 2      |   |  |  |

MASCOT:(PepMatched Observed.Hits Coverage)

No. Protein Matched (SEQUEST MASCOT) emPAI Strategy.Hits PepMatched(SEQUEST MASCOT) SpectraMatched(SEQUEST MASCOT)

95. IPI00371308 Y Y 0.07 1 3 4 3 4

\*Des: PREDICTED: similar to FYVE and coiled-coil domain containing 1

| SEQUEST:(PepMatched Observed.Hits Coverage) |        |            |            |              |          |         |  |  |  |
|---------------------------------------------|--------|------------|------------|--------------|----------|---------|--|--|--|
| Seq                                         | Charge | Xcor       | Delta      | Probability  | PepHits  |         |  |  |  |
| ALQAELSQVR                                  | +2     | 3.068      |            | 0.256        | 0.9902   | 5       |  |  |  |
| LEYLLQFDQK                                  | +2     | 3.213      |            | 0.352        | 0.9983   | 1       |  |  |  |
| TPGIYLLIFDNTFSR                             | +2     | 3.894      |            | 0.512        | 0.9988   | 1       |  |  |  |
| MASCOT:(PepMatched Observed.Hits Coverage)  |        |            |            |              |          |         |  |  |  |
| Seq                                         | Charge | ObservedMS | ExpectedMS | CalculatedMS | Pepscore | PepHits |  |  |  |
|                                             |        |            |            |              | 2.56%    | 1       |  |  |  |

Identified Human Platelet Proteins

|                 |    |        |         |         |      |    |   |
|-----------------|----|--------|---------|---------|------|----|---|
| ALQAELSQVR      | +2 | 557.81 | 1113.60 | 1113.61 | 0    | 44 | 5 |
| LELDQLEVR       | +2 | 557.81 | 1113.61 | 1113.60 | 0.01 | 42 | 2 |
| LEYLLQFDQK      | +2 | 648.85 | 1295.69 | 1295.68 | 0.01 | 49 | 1 |
| TPGIYLLIFDNTFSR | +2 | 879.47 | 1756.94 | 1755.92 | 1.02 | 45 | 1 |

No. 96. Protein IPI00362416 Matched (SEQUEST MASCOT) Y Y emPAI 0.39 Strategy.Hits 2 PepMatched(SEQUEST MASCOT) 6 6 SpectraMatched(SEQUEST MASCOT) 21 32

\*Des: Serum deprivation response protein

|                                             |        |            |            |              |         |          |         |
|---------------------------------------------|--------|------------|------------|--------------|---------|----------|---------|
| SEQUEST:(PepMatched Observed.Hits Coverage) |        | 6          | 3          | 14.85%       |         |          |         |
| Seq                                         | Charge | Xcor       | Delta      | Proability   | PepHits |          |         |
| YQASTSNTVSK                                 | +2     | 3.496      | 0.501      | 1.0000       | 16      |          |         |
| HVQAAVLHVDQT                                | +2     | 3.300      | 0.609      | 1.0000       | 2       |          |         |
| LVNMLDAVR                                   | +2     | 2.856      | 0.327      | 0.9961       | 1       |          |         |
| DNSQVNAVTVHTLLDKLVNMLDAVR                   | +3     | 5.590      | 0.600      | 1.0000       | 3       |          |         |
| LENNHAQLLR                                  | +3     | 2.625      | 0.301      | 0.9961       | 3       |          |         |
| RLENNHAQLLR                                 | +2     | 3.968      | 0.441      | 1.0000       | 11      |          |         |
| MASCOT:(PepMatched Observed.Hits Coverage)  |        | 6          | 3          | 16.03%       |         |          |         |
| Seq                                         | Charge | ObservedMS | ExpectedMS | CalculatedMS |         | Pepscore | PepHits |
| YQASTSNTVSK                                 | +2     | 593.2948   | 1184.5750  | 1184.5673    | 0.01    | 70       | 22      |
| IVSVERR                                     | +2     | 429.7644   | 857.5143   | 857.5083     | 0.01    | 43       | 5       |
| KSLTPNHQK                                   | +2     | 526.8000   | 1051.5855  | 1051.5774    | 0.01    | 49       | 3       |
| DNSQVNAVTVHTLLDKLVNMLDAVR                   | +3     | 922.4964   | 2764.4674  | 2764.4541    | 0.01    | 64       | 2       |
| LENNHAQLLR                                  | +2     | 604.3335   | 1206.6524  | 1206.6469    | 0.01    | 74       | 3       |
| RLENNHAQLLR                                 | +3     | 455.2586   | 1362.7541  | 1362.7480    | 0.01    | 66       | 8       |

No. 97. Protein IPI00361541 Matched (SEQUEST MASCOT) Y Y emPAI 0.09 Strategy.Hits 1 PepMatched(SEQUEST MASCOT) 3 3 SpectraMatched(SEQUEST MASCOT) 5 6

\*Des: PREDICTED: similar to mKIAA1734 protein

|                                             |        |            |            |              |         |          |         |
|---------------------------------------------|--------|------------|------------|--------------|---------|----------|---------|
| SEQUEST:(PepMatched Observed.Hits Coverage) |        | 3          | 1          | 2.91%        |         |          |         |
| Seq                                         | Charge | Xcor       | Delta      | Proability   | PepHits |          |         |
| GLQEGYENSR                                  | +2     | 2.830      | 0.445      | 0.9990       | 2       |          |         |
| AALLEAGMPESTEDK                             | +2     | 3.770      | 0.497      | 0.9998       | 1       |          |         |
| SGYPDIGFPLFPLSK                             | +2     | 3.588      | 0.560      | 1.0000       | 4       |          |         |
| MASCOT:(PepMatched Observed.Hits Coverage)  |        | 3          | 1          | 2.64%        |         |          |         |
| Seq                                         | Charge | ObservedMS | ExpectedMS | CalculatedMS |         | Pepscore | PepHits |
| GLQEGYENSR                                  | +2     | 576.7687   | 1151.5229  | 1151.5207    | 0       | 44       | 2       |
| SGYPDIGFPLFPLSK                             | +2     | 819.4414   | 1636.8683  | 1636.8500    | 0.02    | 59       | 2       |
| LLFSHDLVSGR                                 | +2     | 622.8221   | 1243.6297  | 1242.6720    | 0.96    | 44       | 4       |

No. 98. Protein IPI00210900 Matched (SEQUEST MASCOT) Y Y emPAI 0.15 Strategy.Hits 1 PepMatched(SEQUEST MASCOT) 2 2 SpectraMatched(SEQUEST MASCOT) 5 3

\*Des: AMBP protein precursor

|                                             |        |       |       |            |         |  |  |
|---------------------------------------------|--------|-------|-------|------------|---------|--|--|
| SEQUEST:(PepMatched Observed.Hits Coverage) |        | 2     | 1     | 8.73%      |         |  |  |
| Seq                                         | Charge | Xcor  | Delta | Proability | PepHits |  |  |
| AFAELWAFDAAQGK                              | +2     | 3.533 | 0.468 | 0.9996     | 5       |  |  |
| TIAACNLPIVQGPCR                             | +2     | 2.901 | 0.395 | 0.9964     | 1       |  |  |
| MASCOT:(PepMatched Observed.Hits Coverage)  |        | 2     | 1     | 8.73%      |         |  |  |

Identified Human Platelet Proteins

| Seq             | Charge | ObservedMS | ExpectedMS | CalculatedMS | Pepscore | PepHits |
|-----------------|--------|------------|------------|--------------|----------|---------|
| AFAELWAFDAAQGK  | +2     | 762.8838   | 1523.7530  | 1523.7408    | 0.01     | 64      |
| TIAACNLPIVQGPCR | +2     | 778.4130   | 1554.8114  | 1554.8010    | 0.01     | 59      |

No. 99. Protein IPI00371093 Matched (SEQUEST MASCOT) Y Y emPAI Strategy.Hits 0.54 5 PepMatched(SEQUEST MASCOT) 13 14 68 61 SpectraMatched(SEQUEST MASCOT)

\*Des: 69 kDa protein

| SEQUEST:(PepMatched Observed.Hits Coverage) |        | 13         | 13         | 28.37%       |          |         |    |
|---------------------------------------------|--------|------------|------------|--------------|----------|---------|----|
| Seq                                         | Charge | Xcor       | Delta      | Proability   | PepHits  |         |    |
| AEA AVELR                                   | +2     | 2.806      | 0.275      | 0.9931       | 6        |         |    |
| AELQLDLQKPR                                 | +2     | 3.694      | 0.321      | 0.9986       | 8        |         |    |
| NSQNPNSEAVLLPVAVR                           | +2     | 4.177      | 0.530      | 1.0000       | 6        |         |    |
| LALCELGPMK                                  | +2     | 3.267      | 0.476      | 0.9997       | 3        |         |    |
| QASLTLSLDLGGR                               | +2     | 2.361      | 0.472      | 0.9624       | 2        |         |    |
| AQPVVMATVQLMVQDSLNP TLK                     | +2     | 6.752      | 0.572      | 1.0000       | 33       |         |    |
| GNSFPASLVVAEEVDKEQDGLDSWVSR                 | +3     | 3.838      | 0.461      | 1.0000       | 3        |         |    |
| FGSAIAPLGDLNR                               | +2     | 3.956      | 0.551      | 1.0000       | 6        |         |    |
| VYLFLQPK                                    | +2     | 3.235      | 0.394      | 0.9993       | 11       |         |    |
| RVLLLASR                                    | +2     | 3.148      | 0.298      | 0.9976       | 11       |         |    |
| GLQALSSPTLVLTGTQVYGR                        | +2     | 6.269      | 0.680      | 1.0000       | 11       |         |    |
| GGLLCSTQPPP K                               | +2     | 3.153      | 0.344      | 0.9969       | 11       |         |    |
| SKNSQNPNSEAVLLPVAVR                         | +2     | 5.508      | 0.530      | 1.0000       | 6        |         |    |
| MASCOT:(PepMatched Observed.Hits Coverage)  |        | 14         | 12         | 25.61%       |          |         |    |
| Seq                                         | Charge | ObservedMS | ExpectedMS | CalculatedMS | Pepscore | PepHits |    |
| AEA AVELR                                   | +2     | 429.7404   | 857.4662   | 857.4606     | 0.01     | 51      | 5  |
| LALCELGPMK                                  | +2     | 594.8130   | 1187.6114  | 1187.6042    | 0.01     | 63      | 3  |
| QASLTLSLDLGGR                               | +2     | 666.8206   | 1331.6267  | 1329.7252    | 1.9      | 49      | 1  |
| NSQNPNSEAVLLPVAVR                           | +2     | 904.4905   | 1806.9665  | 1806.9587    | 0.01     | 89      | 7  |
| AELQLDLQKPR                                 | +2     | 655.8801   | 1309.7457  | 1309.7354    | 0.01     | 61      | 3  |
| FGSAIAPLGDLNR                               | +2     | 665.8640   | 1329.7134  | 1329.7040    | 0.01     | 69      | 5  |
| VYLFLQPK                                    | +2     | 504.3028   | 1006.5911  | 1006.5851    | 0.01     | 56      | 9  |
| GLQALSSPTLVLTGTQVYGR                        | +2     | 1031.0784  | 2060.1422  | 2060.1265    | 0.02     | 118     | 10 |
| GGLLCSTQPPP K                               | +2     | 599.3209   | 1196.6273  | 1196.6223    | 0.01     | 52      | 11 |
| RVLLLASR                                    | +2     | 464.3113   | 926.6080   | 926.6025     | 0.01     | 50      | 8  |
| LALCELGPMK                                  | +2     | 658.8683   | 1315.7221  | 1315.6992    | 0.02     | 44      | 2  |
| SKNSQNPNSEAVLLPVAVR                         | +2     | 1012.0575  | 2022.1004  | 2022.0857    | 0.01     | 115     | 6  |
| AQPVVMATVQLMVQDSLNP TLK                     | +2     | 1192.1500  | 2382.2855  | 2382.2650    | 0.02     | 127     | 28 |
| NKPICHTIK                                   | +2     | 527.3007   | 1052.5869  | 1052.5801    | 0.01     | 42      | 1  |

No. 100. Protein IPI00205216 Matched (SEQUEST MASCOT) Y Y emPAI Strategy.Hits 0.28 2 PepMatched(SEQUEST MASCOT) 4 3 4 3 SpectraMatched(SEQUEST MASCOT)

\*Des: P-selectin precursor

| SEQUEST:(PepMatched Observed.Hits Coverage) |        | 4     | 1     | 6.91%      |         |  |  |
|---------------------------------------------|--------|-------|-------|------------|---------|--|--|
| Seq                                         | Charge | Xcor  | Delta | Proability | PepHits |  |  |
| TLTAEAEWADNEPNNKR                           | +2     | 4.412 | 0.429 | 0.9998     | 2       |  |  |
| HFTDLVAIQNK                                 | +2     | 3.125 | 0.427 | 0.9992     | 3       |  |  |
| TLTAEAEWADNEPNNK                            | +2     | 3.819 | 0.457 | 0.9997     | 1       |  |  |

Identified Human Platelet Proteins

| No.   | Protein                                     | Matched (SEQUEST MASCOT) | emPAI      | Strategy.Hits | PepMatched(SEQUEST MASCOT) | SpectraMatched(SEQUEST MASCOT) |        |   |    |  |
|-------|---------------------------------------------|--------------------------|------------|---------------|----------------------------|--------------------------------|--------|---|----|--|
| 101.  | IPI00195685                                 | Y                        | N          | 0.21          | 1                          | 4                              | 0      | 8 | 0  |  |
| *Des: | CD44 protein                                |                          |            |               |                            |                                |        |   |    |  |
|       | SEQUEST:(PepMatched Observed.Hits Coverage) |                          |            |               | 4                          | 1                              | 6.8%   |   |    |  |
|       | Seq                                         | Charge                   | ObservedMS | ExpectedMS    | CalculatedMS               | Pepscore PepHits               |        |   |    |  |
|       | HFTDLVAIQNK                                 | +2                       | 643.35     | 1284.69       | 1284.68                    | 0.01                           | 51     | 2 |    |  |
|       | TLTAAENWADNEPNNK                            | +2                       | 958.94     | 1915.87       | 1915.85                    | 0.02                           | 62     | 1 |    |  |
|       | TLTAAENWADNEPNNKR                           | +3                       | 691.66     | 2071.97       | 2071.96                    | 0.01                           | 47     | 1 |    |  |
| 102.  | IPI00569987                                 | N                        | Y          | 0.85          | 1                          | 0                              | 7      | 0 | 16 |  |
| *Des: | 60 kDa protein                              |                          |            |               |                            |                                |        |   |    |  |
|       | SEQUEST:(PepMatched Observed.Hits Coverage) |                          |            |               | 7                          | 1                              | 16.11% |   |    |  |
|       | MASCOT:(PepMatched Observed.Hits Coverage)  |                          |            |               | 7                          | 1                              | 16.11% |   |    |  |
|       | Seq                                         | Charge                   | ObservedMS | ExpectedMS    | CalculatedMS               | Pepscore PepHits               |        |   |    |  |
|       | INQDGTFLVR                                  | +2                       | 581.81     | 1161.62       | 1161.61                    | 0.01                           | 45     | 2 |    |  |
|       | FLNLTENDIQK                                 | +2                       | 667.85     | 1333.68       | 1333.69                    | 0                              | 64     | 2 |    |  |
|       | YQEESQVYLLGTGLR                             | +2                       | 878.45     | 1754.89       | 1754.88                    | 0.01                           | 99     | 8 |    |  |
|       | TVNNPYVLMVLYK                               | +2                       | 777.43     | 1552.84       | 1552.83                    | 0.01                           | 74     | 2 |    |  |
|       | EDFLSVSDIIDYFR                              | +2                       | 859.92     | 1717.83       | 1717.82                    | 0.01                           | 90     | 2 |    |  |
|       | GKEDFLSVSDIIDYFR                            | +2                       | 952.48     | 1902.94       | 1902.94                    | 0                              | 124    | 2 |    |  |
|       | SEVLAWNPDLNLDYFR                            | +2                       | 955.45     | 1908.89       | 1908.90                    | 0                              | 50     | 4 |    |  |
| 103.  | IPI00205076                                 | N                        | Y          | 0.09          | 1                          | 0                              | 2      | 0 | 2  |  |
| *Des: | Lon                                         |                          |            |               |                            |                                |        |   |    |  |
|       | SEQUEST:(PepMatched Observed.Hits Coverage) |                          |            |               | 2                          | 1                              | 2.69%  |   |    |  |
|       | MASCOT:(PepMatched Observed.Hits Coverage)  |                          |            |               | 2                          | 1                              | 2.69%  |   |    |  |
|       | Seq                                         | Charge                   | ObservedMS | ExpectedMS    | CalculatedMS               | Pepscore PepHits               |        |   |    |  |
|       | VLEFIAVSQLR                                 | +2                       | 638.00     | 1273.99       | 1273.74                    | 0.25                           | 41     | 2 |    |  |
|       | AQLSATVLTLLIK                               | +2                       | 685.94     | 1369.86       | 1369.85                    | 0.01                           | 82     | 1 |    |  |
| 104.  | IPI00557753                                 | N                        | Y          | 0.16          | 1                          | 0                              | 2      | 0 | 4  |  |
| *Des: | 61 kDa protein                              |                          |            |               |                            |                                |        |   |    |  |
|       | SEQUEST:(PepMatched Observed.Hits Coverage) |                          |            |               | 2                          | 1                              | 5.6%   |   |    |  |
|       | MASCOT:(PepMatched Observed.Hits Coverage)  |                          |            |               | 2                          | 1                              | 5.6%   |   |    |  |
|       | Seq                                         | Charge                   | ObservedMS | ExpectedMS    | CalculatedMS               | Pepscore PepHits               |        |   |    |  |

Identified Human Platelet Proteins

|                   |        |         |         |      |    |   |
|-------------------|--------|---------|---------|------|----|---|
| YVLDDEYTSSVGSK +2 | 781.86 | 1561.72 | 1561.71 | 0.01 | 80 | 2 |
| EGSMSEDEFIEEAK +2 | 800.84 | 1599.66 | 1599.66 | 0    | 62 | 2 |

No. 105. Protein IPI00203479 Matched (SEQUEST MASCOT) Y Y emPAI Strategy.Hits 0.15 1 PepMatched(SEQUEST MASCOT) 2 2 SpectraMatched(SEQUEST MASCOT) 3 3

\*Des: Glia derived nexin precursor

|                                                                        |   |   |        |
|------------------------------------------------------------------------|---|---|--------|
| SEQUEST:(PepMatched Observed.Hits Coverage)                            | 2 | 1 | 10.39% |
| Seq Charge Xcor Delta Probility PepHits                                |   |   |        |
| SESLHVSHILQK +2 3.199 0.299 0.9945 4                                   |   |   |        |
| SQPHENVVISPHGIASILGMLQLGADGR +3 6.021 0.634 1.0000 2                   |   |   |        |
| MASCOT:(PepMatched Observed.Hits Coverage)                             | 2 | 1 | 10.39% |
| Seq Charge ObservedMS ExpectedMS CalculatedMS Pepscore PepHits         |   |   |        |
| SESLHVSHILQK +2 689.3839 1376.7533 1376.7412 0.01 55 4                 |   |   |        |
| SQPHENVVISPHGIASILGMLQLGADGR +3 966.1873 2895.5401 2895.5024 0.04 72 2 |   |   |        |

No. 106. Protein IPI00464532 Matched (SEQUEST MASCOT) N Y emPAI Strategy.Hits 0.35 1 PepMatched(SEQUEST MASCOT) 0 2 SpectraMatched(SEQUEST MASCOT) 0 3

\*Des: Pyrroline-5-carboxylate reductase 2

|                                                                |   |   |       |
|----------------------------------------------------------------|---|---|-------|
| SEQUEST:(PepMatched Observed.Hits Coverage)                    | 2 | 1 | 7.66% |
| MASCOT:(PepMatched Observed.Hits Coverage)                     | 2 | 1 | 7.66% |
| Seq Charge ObservedMS ExpectedMS CalculatedMS Pepscore PepHits |   |   |       |
| LGAQALLGAAK +2 507.76 1013.51 1011.61 1.9 68 2                 |   |   |       |
| GFTAAGVLSAHK +2 579.82 1157.63 1157.62 0.01 62 1               |   |   |       |

No. 107. Protein IPI00422076 Matched (SEQUEST MASCOT) Y Y emPAI Strategy.Hits 1.18 5 PepMatched(SEQUEST MASCOT) 38 39 SpectraMatched(SEQUEST MASCOT) 189 238

\*Des: Thrombospondin 1

|                                                 |    |    |       |
|-------------------------------------------------|----|----|-------|
| SEQUEST:(PepMatched Observed.Hits Coverage)     | 38 | 28 | 36.8% |
| Seq Charge Xcor Delta Probility PepHits         |    |    |       |
| CEGSSVQTR +2 2.876 0.449 0.9993 5               |    |    |       |
| SCDSLNNR +2 3.292 0.435 0.9997 8                |    |    |       |
| SCDSLNNRCEGSSVQTR +3 3.807 0.453 1.0000 2       |    |    |       |
| KIMADSGPIYDK +3 2.378 0.428 0.9998 7            |    |    |       |
| GQDLSSPAFR +2 3.328 0.459 0.9997 20             |    |    |       |
| DNCQYVYNVDQR +2 4.062 0.531 1.0000 2            |    |    |       |
| IMADSGPIYDKTYAGGR +2 5.206 0.568 1.0000 9       |    |    |       |
| GTLLAVER +2 2.829 0.370 0.9983 6                |    |    |       |
| GTSQNDPNWVVR +2 3.204 0.374 0.9981 11           |    |    |       |
| QVTQSYWDTNPTR +2 4.278 0.570 1.0000 11          |    |    |       |
| DNSGQIFSVVSNKG +2 3.321 0.402 0.9986 5          |    |    |       |
| VAKGDVNDNFQGVLPQVNR +3 5.658 0.330 1.0000 15    |    |    |       |
| SITLFVQEDR +2 3.413 0.305 0.9977 4              |    |    |       |
| TIVTTLQDSIR +2 3.796 0.486 1.0000 18            |    |    |       |
| AGTLDLSLSPGK +2 4.485 0.330 0.9993 14           |    |    |       |
| FVFGTTPEDILR +2 3.592 0.541 1.0000 19           |    |    |       |
| QQVVSVEEALLATGQWK +2 5.516 0.522 1.0000 25      |    |    |       |
| TKDLQAICGLSCDELSSMVLELR +3 4.377 0.401 0.9999 3 |    |    |       |

Identified Human Platelet Proteins

| Seq                                        | Charge | ObservedMS | ExpectedMS | CalculatedMS | Pepscore  | PepHits         |     |    |
|--------------------------------------------|--------|------------|------------|--------------|-----------|-----------------|-----|----|
| GVEHAMANK                                  | +2     | 3.046      | 0.425      | 0.9993       | 31        |                 |     |    |
| AGTLDLSLSLPGKQQVVSVEEALLATGQWK             |        |            |            | +3           | 6.229     | 0.610 1.0000 12 |     |    |
| IPESGGDNGVDFIFELIGGAR                      | +2     | 5.992      | 0.576      | 1.0000       | 3         |                 |     |    |
| NPCTDGTDCNNAK                              | +3     | 2.526      | 0.401      | 0.9992       | 5         |                 |     |    |
| NPCTDGTDCNK                                | +2     | 3.558      | 0.468      | 0.9997       | 1         |                 |     |    |
| GRCDLNNR                                   | +2     | 2.829      | 0.350      | 0.9833       | 2         |                 |     |    |
| LCNSPSPQMNGKPCGEAR                         | +3     | 3.022      | 0.487      | 1.0000       | 6         |                 |     |    |
| KVTEENRELAELR                              | +2     | 3.847      | 0.391      | 0.9966       | 5         |                 |     |    |
| FTGSQPFGR                                  | +2     | 2.541      | 0.337      | 0.9930       | 10        |                 |     |    |
| DTDMGVGDQCDNCPLEHNPDLSDSDR                 |        |            |            | +3           | 6.130     | 0.583 1.0000 1  |     |    |
| GTLLAVERK                                  | +2     | 2.777      | 0.266      | 0.9890       | 9         |                 |     |    |
| NTDPGYNCLPCPPR                             | +2     | 3.289      | 0.531      | 0.9997       | 6         |                 |     |    |
| TIVTTLQDSIRK                               | +2     | 3.454      | 0.383      | 0.9989       | 2         |                 |     |    |
| FQMIPLDPK                                  | +2     | 3.362      | 0.408      | 0.9995       | 16        |                 |     |    |
| GFIFLASLR                                  | +2     | 2.886      | 0.344      | 0.9971       | 3         |                 |     |    |
| LVKGQDLSSPAFR                              | +2     | 3.441      | 0.499      | 0.9988       | 9         |                 |     |    |
| NALWHTGNTPGQVR                             | +3     | 4.073      | 0.469      | 1.0000       | 25        |                 |     |    |
| SRLCNNPTQFGGK                              | +2     | 3.746      | 0.474      | 0.9987       | 1         |                 |     |    |
| KIMADSGPIYDKTYAGGR                         | +2     | 5.394      | 0.552      | 1.0000       | 7         |                 |     |    |
| HIGWKDFTAYR                                | +3     | 3.009      | 0.424      | 0.9999       | 10        |                 |     |    |
| MASCOT:(PepMatched Observed.Hits Coverage) |        | 39         | 35         | 29.24%       |           |                 |     |    |
| Seq                                        | Charge | ObservedMS | ExpectedMS | CalculatedMS |           |                 |     |    |
| SCDSLNNR                                   | +2     | 454.7010   | 907.3874   | 907.3818     | 0.01      | 68              | 5   |    |
| CEGSSVQTR                                  | +2     | 483.7220   | 965.4294   | 965.4236     | 0.01      | 69              | 7   |    |
| FVFGTTPEDILR                               | +2     | 697.8741   | 1393.7336  | 1393.7241    | 0.01      | 54              | 14  |    |
| GVEHAMANK                                  | +2     | 478.2863   | 954.5581   | 955.4545     | -0.89     | 57              | 33  |    |
| AQGYGLSVK                                  | +2     | 505.2725   | 1008.5305  | 1008.5240    | 0.01      | 41              | 5   |    |
| GQDLSSPAFR                                 | +2     | 539.2734   | 1076.5322  | 1076.5250    | 0.01      | 66              | 25  |    |
| IMADSGPIYDK                                | +2     | 605.2989   | 1208.5833  | 1208.5747    | 0.01      | 71              | 15  |    |
| GTSQNDPNWVVR                               | +2     | 686.8390   | 1371.6634  | 1371.6531    | 0.01      | 56              | 15  |    |
| QVTQSYWDTNPTR                              | +2     | 798.3820   | 1594.7494  | 1594.7376    | 0.01      | 94              | 16  |    |
| DNSGQIFSVVSNK                              | +2     | 726.3679   | 1450.7213  | 1450.7052    | 0.02      | 68              | 12  |    |
| GDVNDNFQGVLQNV                             | +2     |            | 837.9201   | 1673.8257    | 1673.8121 | 0.01            | 97  | 20 |
| SITLFVQEDR                                 | +2     | 604.3232   | 1206.6318  | 1206.6244    | 0.01      | 56              | 5   |    |
| TIVTTLQDSIR                                | +2     | 623.8588   | 1245.7030  | 1245.6929    | 0.01      | 72              | 15  |    |
| QQVVSVEEALLATGQWK                          | +2     |            | 943.5131   | 1885.0116    | 1884.9945 | 0.02            | 120 | 38 |
| SCDSLNNRCEGSSVQTR                          | +3     |            | 619.2775   | 1854.8106    | 1854.7948 | 0.02            | 55  | 1  |
| KIMADSGPIYDK                               | +2     | 669.3469   | 1336.6792  | 1336.6696    | 0.01      | 59              | 5   |    |
| GTLLAVER                                   | +2     | 429.7588   | 857.5030   | 857.4970     | 0.01      | 58              | 4   |    |
| DNCQYVYNVDQR                               | +2     | 758.8339   | 1515.6532  | 1515.6412    | 0.01      | 79              | 2   |    |
| IMADSGPIYDKTYAGGR                          | +2     |            | 907.9481   | 1813.8817    | 1813.8668 | 0.01            | 146 | 17 |
| KDNSGQIFSVVSNK                             | +2     |            | 790.9079   | 1579.8012    | 1578.8001 | 1               | 76  | 1  |
| VAKGDVNDNFQGVLQNV                          | +2     |            | 987.0223   | 1972.0301    | 1972.0125 | 0.02            | 119 | 16 |
| AGTLDLSLSLPGK                              | +2     | 636.3677   | 1270.7208  | 1270.7132    | 0.01      | 94              | 12  |    |
| FYVVMWK                                    | +2     | 486.7570   | 971.4995   | 971.4939     | 0.01      | 46              | 8   |    |
| NPCTDGTDCNNAK                              | +2     |            | 809.3479   | 1616.6812    | 1616.6671 | 0.01            | 69  | 5  |
| GRCDLNNR                                   | +2     | 561.2621   | 1120.5097  | 1120.5043    | 0.01      | 45              | 2   |    |

Identified Human Platelet Proteins

|                               |    |          |           |           |       |           |           |           |      |    |   |
|-------------------------------|----|----------|-----------|-----------|-------|-----------|-----------|-----------|------|----|---|
| NPCTDGTHDCNK                  | +2 | 652.7591 | 1303.5036 | 1303.4921 | 0.01  | 68        | 1         |           |      |    |   |
| TNYIGHK                       | +2 | 416.3509 | 830.6873  | 831.4239  | -0.73 | 55        | 23        |           |      |    |   |
| FTGSQPFGR                     | +2 | 498.7522 | 995.4899  | 995.4824  | 0.01  | 54        | 13        |           |      |    |   |
| VTEENRELAELR                  | +2 | 773.4012 | 1544.7879 | 1544.7794 | 0.01  | 47        | 2         |           |      |    |   |
| KVTEENRELAELR                 | +2 | 837.4514 | 1672.8883 | 1672.8743 | 0.01  | 55        | 4         |           |      |    |   |
| NTDPGYNCLPCPPR                | +2 | 773.8490 | 1545.6834 | 1545.6704 | 0.01  | 73        | 6         |           |      |    |   |
| FQMIPLDPK                     | +2 | 544.7974 | 1087.5803 | 1087.5736 | 0.01  | 53        | 10        |           |      |    |   |
| TIVTTLQDSIRK                  | +2 | 687.9068 | 1373.7990 | 1373.7878 | 0.01  | 69        | 3         |           |      |    |   |
| GTLLAVERK                     | +2 | 493.8068 | 985.5990  | 985.5920  | 0.01  | 58        | 6         |           |      |    |   |
| AGTLDLSLSLPGKQVVSVEEALLATGQWK | +3 |          |           |           |       | 1046.9149 | 3137.7229 | 3137.6971 | 0.03 | 75 | 4 |
| LVKGQDLSSPAFR                 | +2 | 709.3984 | 1416.7823 | 1416.7725 | 0.01  | 67        | 8         |           |      |    |   |
| NALWHTGNTPGQVR                | +2 | 775.9003 | 1549.7861 | 1549.7749 | 0.01  | 71        | 23        |           |      |    |   |
| SRLCNNPTPQFGGK                | +2 | 759.8849 | 1517.7553 | 1517.7408 | 0.01  | 57        | 1         |           |      |    |   |
| KIMADSGPIYDKTYAGGR            | +2 | 971.9980 | 1941.9814 | 1941.9618 | 0.02  | 119       | 8         |           |      |    |   |

No. Protein Matched (SEQUEST MASCOT) emPAI Strategy.Hits PepMatched(SEQUEST MASCOT) SpectraMatched(SEQUEST MASCOT)  
 108. IPI00560835 N Y 0.06 1 0 2 0 2

\*Des: 181 kDa protein

SEQUEST:(PepMatched Observed.Hits Coverage)

| Seq                                                 | Charge | ObservedMS | ExpectedMS | CalculatedMS | PepScore | PepHits |
|-----------------------------------------------------|--------|------------|------------|--------------|----------|---------|
| MASCOT:(PepMatched Observed.Hits Coverage) 2 1 1.2% |        |            |            |              |          |         |
| EITALPIFEK                                          | +2     | 580.0213   | 1158.0280  | 1159.6488    | -1.61    | 43 3    |
| CASLKCAK                                            | +2     | 412.5416   | 823.0686   | 822.4091     | 0.66     | 41 1    |

No. Protein Matched (SEQUEST MASCOT) emPAI Strategy.Hits PepMatched(SEQUEST MASCOT) SpectraMatched(SEQUEST MASCOT)  
 109. IPI00200067 Y N 0.42 1 2 0 4 0

\*Des: Junctional adhesion molecule JAM

SEQUEST:(PepMatched Observed.Hits Coverage) 2 1 11.8%

| Seq                 | Charge | Xcor  | Delta | Probility | PepHits |
|---------------------|--------|-------|-------|-----------|---------|
| GSVYSPQTAVQVPENDSVK | +2     | 5.278 | 0.572 | 1.0000    | 2       |
| VTFSSSGITFSSVTR     | +2     | 4.422 | 0.583 | 1.0000    | 2       |

MASCOT:(PepMatched Observed.Hits Coverage)

No. Protein Matched (SEQUEST MASCOT) emPAI Strategy.Hits PepMatched(SEQUEST MASCOT) SpectraMatched(SEQUEST MASCOT)  
 110. IPI00464535 Y Y 0.22 1 2 2 2 4

\*Des: Splice Isoform 2 of Plasminogen activator inhibitor 1 RNA-binding protein

SEQUEST:(PepMatched Observed.Hits Coverage) 2 1 7.26%

| Seq             | Charge | Xcor  | Delta | Probility | PepHits |
|-----------------|--------|-------|-------|-----------|---------|
| SAAQAAAQTSNAAGK | +2     | 4.495 | 0.534 | 1.0000    | 1       |
| RPDQQLQGDK      | +2     | 3.168 | 0.482 | 0.9996    | 2       |

MASCOT:(PepMatched Observed.Hits Coverage) 2 1 7.26%

| Seq             | Charge | ObservedMS | ExpectedMS | CalculatedMS | PepScore | PepHits |
|-----------------|--------|------------|------------|--------------|----------|---------|
| RPDQQLQGDK      | +2     | 621.3174   | 1240.6203  | 1240.6160    | 0        | 48 2    |
| SAAQAAAQTSNAAGK | +2     | 730.8640   | 1459.7135  | 1459.7015    | 0.01     | 94 2    |

No. Protein Matched (SEQUEST MASCOT) emPAI Strategy.Hits PepMatched(SEQUEST MASCOT) SpectraMatched(SEQUEST MASCOT)  
 111. IPI00198232 N Y 0.19 1 0 3 0 6

**Identified Human Platelet Proteins**

|              |                                                                           |                                 |              |                      |                                   |                                       |    |   |  |  |
|--------------|---------------------------------------------------------------------------|---------------------------------|--------------|----------------------|-----------------------------------|---------------------------------------|----|---|--|--|
| <b>*Des:</b> | <b>83 kDa protein</b>                                                     |                                 |              |                      |                                   |                                       |    |   |  |  |
|              | SEQUEST:(PepMatched Observed.Hits Coverage)                               |                                 |              |                      |                                   |                                       |    |   |  |  |
|              | MASCOT:(PepMatched Observed.Hits Coverage)                                | 3                               | 1            | 5.17%                |                                   |                                       |    |   |  |  |
|              | Seq                                                                       | Charge                          | ObservedMS   | ExpectedMS           | CalculatedMS                      | Pepscore PepHits                      |    |   |  |  |
|              | IYGISFPDPK                                                                | +2                              | 568.80       | 1135.59              | 1135.59                           | 0                                     | 41 | 3 |  |  |
|              | NELSGALTGLTR                                                              | +2                              | 616.34       | 1230.66              | 1230.66                           | 0                                     | 47 | 3 |  |  |
|              | FLGDIEIWNQAEK                                                             | +2                              | 781.90       | 1561.78              | 1561.78                           | 0                                     | 56 | 2 |  |  |
| <b>No.</b>   | <b>Protein</b>                                                            | <b>Matched (SEQUEST MASCOT)</b> | <b>emPAI</b> | <b>Strategy.Hits</b> | <b>PepMatched(SEQUEST MASCOT)</b> | <b>SpectraMatched(SEQUEST MASCOT)</b> |    |   |  |  |
| 112.         | IPI00188610                                                               | Y N                             | 0.39         | 1                    | 2                                 | 0                                     | 6  | 0 |  |  |
| <b>*Des:</b> | <b>17 kDa protein</b>                                                     |                                 |              |                      |                                   |                                       |    |   |  |  |
|              | SEQUEST:(PepMatched Observed.Hits Coverage)                               |                                 |              |                      |                                   |                                       |    |   |  |  |
|              | Seq                                                                       | Charge                          | Xcor         | Delta                | Proability                        | PepHits                               |    |   |  |  |
|              | GDFCIQVGR                                                                 | +2                              | 3.235        | 0.415                | 0.9995                            | 3                                     |    |   |  |  |
|              | VMLGETNPADSKPGTIR                                                         | +2                              | 4.725        | 0.548                | 1.0000                            | 15                                    |    |   |  |  |
|              | MASCOT:(PepMatched Observed.Hits Coverage)                                |                                 |              |                      |                                   |                                       |    |   |  |  |
| <b>No.</b>   | <b>Protein</b>                                                            | <b>Matched (SEQUEST MASCOT)</b> | <b>emPAI</b> | <b>Strategy.Hits</b> | <b>PepMatched(SEQUEST MASCOT)</b> | <b>SpectraMatched(SEQUEST MASCOT)</b> |    |   |  |  |
| 113.         | IPI00196703                                                               | Y Y                             | 0.2          | 1                    | 5                                 | 4                                     | 6  | 5 |  |  |
| <b>*Des:</b> | <b>Dynactin-1</b>                                                         |                                 |              |                      |                                   |                                       |    |   |  |  |
|              | SEQUEST:(PepMatched Observed.Hits Coverage)                               |                                 |              |                      |                                   |                                       |    |   |  |  |
|              | Seq                                                                       | Charge                          | Xcor         | Delta                | Proability                        | PepHits                               |    |   |  |  |
|              | SPSAQLMEQVAQLK                                                            | +2                              | 3.175        | 0.437                | 0.9990                            | 1                                     |    |   |  |  |
|              | VDELTTDLEILK                                                              | +2                              | 3.662        | 0.373                | 0.9992                            | 2                                     |    |   |  |  |
|              | ETVTQRPGATVPTDFATFPSSAFLR                                                 | +3                              | 3.413        | 0.335                | 0.9986                            | 1                                     |    |   |  |  |
|              | DSPLLLQQISAMR                                                             | +2                              | 2.704        | 0.322                | 0.9863                            | 1                                     |    |   |  |  |
|              | SLDFLIELLHK                                                               | +2                              | 3.300        | 0.513                | 0.9998                            | 2                                     |    |   |  |  |
|              | MASCOT:(PepMatched Observed.Hits Coverage)                                |                                 |              |                      |                                   |                                       |    |   |  |  |
|              | Seq                                                                       | Charge                          | ObservedMS   | ExpectedMS           | CalculatedMS                      | Pepscore PepHits                      |    |   |  |  |
|              | LEETQTLLR                                                                 | +2                              | 551.81       | 1101.60              | 1101.60                           | 0                                     | 63 | 2 |  |  |
|              | VDELTTDLEILK                                                              | +2                              | 694.89       | 1387.76              | 1387.74                           | 0.02                                  | 45 | 2 |  |  |
|              | DSPLLLQQISAMR                                                             | +2                              | 736.40       | 1470.79              | 1470.79                           | 0                                     | 41 | 1 |  |  |
|              | SLDFLIELLHK                                                               | +2                              | 664.39       | 1326.76              | 1326.75                           | 0.01                                  | 55 | 2 |  |  |
| <b>No.</b>   | <b>Protein</b>                                                            | <b>Matched (SEQUEST MASCOT)</b> | <b>emPAI</b> | <b>Strategy.Hits</b> | <b>PepMatched(SEQUEST MASCOT)</b> | <b>SpectraMatched(SEQUEST MASCOT)</b> |    |   |  |  |
| 114.         | IPI00372040                                                               | Y Y                             | 2.72         | 2                    | 7                                 | 6                                     | 13 | 8 |  |  |
| <b>*Des:</b> | <b>PREDICTED: similar to actin related protein 2/3 complex, subunit 4</b> |                                 |              |                      |                                   |                                       |    |   |  |  |
|              | SEQUEST:(PepMatched Observed.Hits Coverage)                               |                                 |              |                      |                                   |                                       |    |   |  |  |
|              | Seq                                                                       | Charge                          | Xcor         | Delta                | Proability                        | PepHits                               |    |   |  |  |
|              | EKVLIEGSINSVR                                                             | +2                              | 3.156        | 0.504                | 0.9742                            | 1                                     |    |   |  |  |
|              | SSKELLQPVTISR                                                             | +2                              | 4.472        | 0.679                | 1.0000                            | 5                                     |    |   |  |  |
|              | AENFFILR                                                                  | +2                              | 2.779        | 0.523                | 0.9938                            | 2                                     |    |   |  |  |
|              | KPVEGYDISFLITNFHTEQMYK                                                    | +3                              | 6.567        | 0.694                | 1.0000                            | 1                                     |    |   |  |  |
|              | IVAEFLKN                                                                  | +2                              | 2.706        | 0.695                | 0.9847                            | 3                                     |    |   |  |  |
|              | LVDFVIHFMEEDKEISEMKLSVNAR                                                 | +3                              | 6.389        | 0.643                | 1.0000                            | 3                                     |    |   |  |  |
|              | LVDFVIHFMEEDKEISEMK                                                       | +2                              | 5.495        | 0.722                | 1.0000                            | 4                                     |    |   |  |  |
|              | MASCOT:(PepMatched Observed.Hits Coverage)                                |                                 |              |                      |                                   |                                       |    |   |  |  |
|              |                                                                           |                                 | 6            | 4                    | 49.12%                            |                                       |    |   |  |  |



Identified Human Platelet Proteins

| Seq                    | Charge | ObservedMS | ExpectedMS | CalculatedMS | Pepscore | PepHits |
|------------------------|--------|------------|------------|--------------|----------|---------|
| VLEGSINSVR             | +2     | 593.84     | 1185.67    | 1185.67      | 0        | 65      |
| EKVLIEGSINSVR          | +2     | 722.41     | 1442.81    | 1442.81      | 0        | 41      |
| SSKELLQPVITSR          | +2     | 785.96     | 1569.91    | 1569.91      | 0        | 76      |
| IVAEFLKFN              | +2     | 605.33     | 1208.64    | 1208.64      | 0        | 47      |
| KPVEGYDISFLITNFHTEQMYK | +3     | 887.44     | 2659.30    | 2659.30      | 0        | 81      |
| LVDFVIHFMEIDKEISEMK    | +3     | 818.08     | 2451.21    | 2451.21      | 0        | 53      |

No. 115. Protein IPI00364021 Matched (SEQUEST MASCOT) N Y emPAI Strategy.Hits 0.2 1 PepMatched(SEQUEST MASCOT) 0 SpectraMatched(SEQUEST MASCOT) 2

\*Des: Angiopoietin-1 precursor  
 SEQUEST:(PepMatched Observed.Hits Coverage)  
 MASCOT:(PepMatched Observed.Hits Coverage)

| Seq             | Charge | ObservedMS | ExpectedMS | CalculatedMS | Pepscore | PepHits |
|-----------------|--------|------------|------------|--------------|----------|---------|
| EDGSLDFQR       | +2     | 533.74     | 1065.47    | 1065.47      | 0        | 46      |
| SGIYTIYFNNMPEPK | +2     | 887.44     | 1772.86    | 1772.84      | 0.02     | 43      |

No. 116. Protein IPI00188541 Matched (SEQUEST MASCOT) Y Y emPAI Strategy.Hits 0.18 4 PepMatched(SEQUEST MASCOT) 11 SpectraMatched(SEQUEST MASCOT) 12

\*Des: Inter-alpha-inhibitor H4 heavy chain  
 SEQUEST:(PepMatched Observed.Hits Coverage) 11 5 15.91%

| Seq                     | Charge | Xcor  | Delta | Proability | PepHits |
|-------------------------|--------|-------|-------|------------|---------|
| LGDGLVGSR               | +2     | 2.637 | 0.246 | 0.9799     | 6       |
| TTFELIYQELLQR           | +2     | 3.797 | 0.442 | 0.9997     | 4       |
| VVEQEGTTPPEESPNDHPR     | +3     | 4.173 | 0.641 | 1.0000     | 1       |
| LGMYEALLK               | +2     | 2.879 | 0.378 | 0.9982     | 4       |
| IPAQGGTNINK             | +2     | 3.050 | 0.398 | 0.9985     | 3       |
| QYTAAVGRGESAGLVK        | +2     | 4.126 | 0.379 | 0.9968     | 1       |
| AVDYASKIPAQGGTNINK      | +2     | 4.723 | 0.530 | 1.0000     | 2       |
| LRDQGPVLLAK             | +3     | 3.963 | 0.343 | 0.9999     | 8       |
| VLDLPSLSSQDPAGPSLAMPLPK | +2     | 5.601 | 0.588 | 1.0000     | 5       |
| TLFSVLPGLK              | +2     | 2.843 | 0.342 | 0.9947     | 2       |
| AHIQFKPTLSQQR           | +2     | 3.702 | 0.463 | 0.9997     | 3       |

| Seq                     | Charge | ObservedMS | ExpectedMS | CalculatedMS | Pepscore | PepHits |
|-------------------------|--------|------------|------------|--------------|----------|---------|
| LGDGLVGSR               | +2     | 437.2462   | 872.4778   | 872.4715     | 0.01     | 61      |
| LALDNGGLAR              | +2     | 500.7779   | 999.5412   | 998.5508     | 0.99     | 50      |
| LGMYEALLK               | +2     | 540.3126   | 1078.6106  | 1078.6096    | 0        | 47      |
| TTFELIYQELLQR           | +2     | 827.4501   | 1652.8856  | 1652.8773    | 0.01     | 70      |
| IPAQGGTNINK             | +2     | 556.8109   | 1111.6072  | 1111.5985    | 0.01     | 45      |
| QYTAAVGRGESAGLVK        | +2     | 803.9388   | 1605.8631  | 1605.8474    | 0.02     | 69      |
| AVDYASKIPAQGGTNINK      | +2     | 923.9955   | 1845.9765  | 1845.9584    | 0.02     | 89      |
| VLDLPSLSSQDPAGPSLAMPLPK | +2     | 1118.6064  | 2235.1983  | 2235.1820    | 0.02     | 91      |
| LRDQGPVLLAK             | +2     | 662.8893   | 1323.7641  | 1323.7510    | 0.01     | 61      |
| TLFSVLPGLK              | +2     | 537.8340   | 1073.6535  | 1073.6484    | 0.01     | 41      |
| HFKPTTGSK               | +2     | 552.2989   | 1102.5833  | 1102.5771    | 0.01     | 41      |
| AHIQFKPTLSQQR           | +2     | 777.4371   | 1552.8596  | 1552.8474    | 0.01     | 56      |

Identified Human Platelet Proteins

| No.   | Protein                                                              | Matched (SEQUEST MASCOT) | emPAI      | Strategy.Hits | PepMatched(SEQUEST MASCOT) | SpectraMatched(SEQUEST MASCOT) |
|-------|----------------------------------------------------------------------|--------------------------|------------|---------------|----------------------------|--------------------------------|
| 117.  | IPI00209436                                                          | Y Y                      | 1.17       | 3             | 17 8                       | 46 108                         |
| *Des: | PREDICTED: similar to pyruvate kinase (EC 2.7.1.40) isozyme M2 - rat |                          |            |               |                            |                                |
|       | SEQUEST:(PepMatched Observed.Hits Coverage) 17 8 47.77%              |                          |            |               |                            |                                |
|       | Seq                                                                  | Charge                   | Xcor       | Delta         | Proability                 | PepHits                        |
|       | LDIDSAPITAR                                                          | +2                       |            | 3.938         | 0.421                      | 0.9997 7                       |
|       | GADYLVTEVENGGSLGSK                                                   | +2                       |            | 6.045         | 0.455                      | 1.0000 2                       |
|       | IYVDDGLISLQVK                                                        | +2                       |            | 4.100         | 0.475                      | 1.0000 4                       |
|       | LAPITSDPTEAAAVGAVEASFK                                               | +2                       |            | 5.811         | 0.641                      | 1.0000 6                       |
|       | AEGSDVANAVLDGADCIMLSGETAKGDYPLEAVR                                   | +3                       |            | 5.945         | 0.616                      | 1.0000 2                       |
|       | ITLDNAYMEK                                                           | +2                       |            | 2.791         | 0.325                      | 0.9942 3                       |
|       | DAVLDAWAEDVDLR                                                       | +2                       |            | 4.884         | 0.533                      | 1.0000 3                       |
|       | KAADVHEVR                                                            | +2                       |            | 2.908         | 0.273                      | 0.9925 4                       |
|       | RFDEILEASDGIMVAR                                                     | +2                       |            | 4.491         | 0.496                      | 1.0000 4                       |
|       | KAADVHEVRK                                                           | +2                       |            | 3.174         | 0.128                      | 0.9573 1                       |
|       | LNFSHGTHEYHAETIK                                                     | +3                       |            | 4.983         | 0.434                      | 1.0000 10                      |
|       | APIIAVTR                                                             | +2                       | 2.684      | 0.317         | 0.9949                     | 11                             |
|       | NTGIICTIGPASR                                                        | +2                       |            | 3.670         | 0.463                      | 0.9997 9                       |
|       | TGLIKGSGTAEVELKK                                                     | +3                       |            | 3.758         | 0.448                      | 1.0000 1                       |
|       | AGKPVICATQMLESNIK                                                    | +3                       |            | 3.934         | 0.436                      | 1.0000 2                       |
|       | LNFSHGTHEYHAETIKNVR                                                  | +3                       |            | 3.928         | 0.424                      | 1.0000 1                       |
|       | KGDVVIVLTGWRPGSGFTNTMR                                               | +3                       |            | 3.654         | 0.400                      | 0.9999 1                       |
|       | MASCOT:(PepMatched Observed.Hits Coverage) 8 5 24.25%                |                          |            |               |                            |                                |
|       | Seq                                                                  | Charge                   | ObservedMS | ExpectedMS    | CalculatedMS               | Pepscore PepHits               |
|       | GADYLVTEVENGGSLGSK                                                   | +2                       |            | 898.4408      | 1794.8670                  | 1794.8635 0 52 4               |
|       | RFDEILEASDGIMVAR                                                     | +2                       |            | 910.7737      | 1819.5328                  | 1820.9090 -1.37 62 12          |
|       | LNFSHGTHEYHAETIK                                                     | +3                       |            | 628.6400      | 1882.8982                  | 1882.8962 0 63 56              |
|       | AATESFASDPILYRPVAVALDTKGPEIR                                         | +3                       |            | 996.5350      | 2986.5833                  | 2986.5763 0.01 81 8            |
|       | KAADVHEVR                                                            | +2                       |            | 512.7808      | 1023.5471                  | 1023.5461 0 55 27              |
|       | SGGTAEVELKK                                                          | +2                       |            | 559.8065      | 1117.5984                  | 1117.5978 0 55 33              |
|       | IISKIENHEGVR                                                         | +2                       |            | 697.8914      | 1393.7683                  | 1393.7677 0 48 58              |
|       | NTGIICTIGPASR                                                        | +2                       |            | 651.8461      | 1301.6777                  | 1301.6761 0 53 18              |

| No.   | Protein                                                  | Matched (SEQUEST MASCOT) | emPAI      | Strategy.Hits | PepMatched(SEQUEST MASCOT) | SpectraMatched(SEQUEST MASCOT) |
|-------|----------------------------------------------------------|--------------------------|------------|---------------|----------------------------|--------------------------------|
| 118.  | IPI00209290                                              | Y Y                      | 0.42       | 1             | 2 2                        | 2 6                            |
| *Des: | Vesicle-associated membrane protein-associated protein A |                          |            |               |                            |                                |
|       | SEQUEST:(PepMatched Observed.Hits Coverage) 2 1 14.17%   |                          |            |               |                            |                                |
|       | Seq                                                      | Charge                   | Xcor       | Delta         | Proability                 | PepHits                        |
|       | QDGPLPKPHSVSLNDTETR                                      | +3                       |            | 3.201         | 0.492                      | 0.9999 3                       |
|       | HEQILVLDPPSDLK                                           | +2                       |            | 3.517         | 0.495                      | 0.9999 3                       |
|       | MASCOT:(PepMatched Observed.Hits Coverage) 2 1 11.33%    |                          |            |               |                            |                                |
|       | Seq                                                      | Charge                   | ObservedMS | ExpectedMS    | CalculatedMS               | Pepscore PepHits               |
|       | GPFTDVVTTNLK                                             | +2                       |            | 646.35        | 1290.69                    | 1290.68 0.01 79 4              |
|       | HEQILVLDPPSDLK                                           | +2                       |            | 802.44        | 1602.87                    | 1602.86 0.01 58 6              |

| No. | Protein | Matched (SEQUEST MASCOT) | emPAI | Strategy.Hits | PepMatched(SEQUEST MASCOT) | SpectraMatched(SEQUEST MASCOT) |
|-----|---------|--------------------------|-------|---------------|----------------------------|--------------------------------|
|-----|---------|--------------------------|-------|---------------|----------------------------|--------------------------------|

Identified Human Platelet Proteins

|       |                                             |                          |            |               |                            |                                |    |   |   |
|-------|---------------------------------------------|--------------------------|------------|---------------|----------------------------|--------------------------------|----|---|---|
| 119.  | IPI00206020                                 | N                        | Y          | 0.42          | 1                          | 0                              | 2  | 0 | 2 |
| *Des: | Similar to ribosome-binding protein p34-rat |                          |            |               |                            |                                |    |   |   |
|       | SEQUEST:(PepMatched Observed.Hits Coverage) |                          |            |               |                            |                                |    |   |   |
|       | MASCOT:(PepMatched Observed.Hits Coverage)  | 2                        | 1          | 7.66%         |                            |                                |    |   |   |
|       | Seq                                         | Charge                   | ObservedMS | ExpectedMS    | CalculatedMS               | Pepscore PepHits               |    |   |   |
|       | LQQLPADFGR                                  | +2                       | 572.8547   | 1143.6948     | 1143.6036                  | 0.09                           | 37 | 1 |   |
|       | LVTLPVSFAQLK                                | +2                       | 658.4535   | 1314.8924     | 1314.7911                  | 0.1                            | 46 | 1 |   |
| No.   | Protein                                     | Matched (SEQUEST MASCOT) | emPAI      | Strategy.Hits | PepMatched(SEQUEST MASCOT) | SpectraMatched(SEQUEST MASCOT) |    |   |   |
| 120.  | IPI00390695                                 | Y                        | Y          | 0.66          | 1                          | 2                              | 2  | 4 | 4 |
| *Des: | PREDICTED: similar to RIKEN cDNA 1810009N02 |                          |            |               |                            |                                |    |   |   |
|       | SEQUEST:(PepMatched Observed.Hits Coverage) |                          |            |               |                            |                                |    |   |   |
|       | Seq                                         | Charge                   | Xcor       | Delta         | Proability                 | PepHits                        |    |   |   |
|       | GYHVVLASASPR                                | +2                       | 3.420      | 0.397         | 0.9996                     | 6                              |    |   |   |
|       | LLPSGPGQEVESQ                               | +2                       | 2.953      | 0.512         | 0.9993                     | 4                              |    |   |   |
|       | MASCOT:(PepMatched Observed.Hits Coverage)  | 2                        | 1          | 12.17%        |                            |                                |    |   |   |
|       | Seq                                         | Charge                   | ObservedMS | ExpectedMS    | CalculatedMS               | Pepscore PepHits               |    |   |   |
|       | GYHVVLASASPR                                | +2                       | 628.85     | 1255.68       | 1255.67                    | 0.01                           | 54 | 4 |   |
|       | LLPSGPGQEVESQT                              | +2                       | 721.37     | 1440.72       | 1440.71                    | 0.01                           | 61 | 4 |   |
| No.   | Protein                                     | Matched (SEQUEST MASCOT) | emPAI      | Strategy.Hits | PepMatched(SEQUEST MASCOT) | SpectraMatched(SEQUEST MASCOT) |    |   |   |
| 121.  | IPI00209291                                 | Y                        | Y          | 0.05          | 2                          | 4                              | 2  | 8 | 4 |
| *Des: | GLUT4 vesicle protein                       |                          |            |               |                            |                                |    |   |   |
|       | SEQUEST:(PepMatched Observed.Hits Coverage) |                          |            |               |                            |                                |    |   |   |
|       | Seq                                         | Charge                   | Xcor       | Delta         | Proability                 | PepHits                        |    |   |   |
|       | SPEEGAGPEPSGQSPATDSTR                       | +2                       | 3.856      | 0.450         | 0.9992                     | 1                              |    |   |   |
|       | SQELDVQVKDDSR                               | +2                       | 3.908      | 0.447         | 0.9976                     | 3                              |    |   |   |
|       | YKVGLTTVLNSGFLDEWLTLEDVPSGR                 | +3                       | 5.027      | 0.503         | 1.0000                     | 2                              |    |   |   |
|       | LSPRPTAAELEEVLQVNSLIQTQK                    | +3                       | 4.600      | 0.495         | 1.0000                     | 3                              |    |   |   |
|       | MASCOT:(PepMatched Observed.Hits Coverage)  | 2                        | 2          | 2.25%         |                            |                                |    |   |   |
|       | Seq                                         | Charge                   | ObservedMS | ExpectedMS    | CalculatedMS               | Pepscore PepHits               |    |   |   |
|       | QLLDDEER                                    | +2                       | 509.2538   | 1016.4930     | 1016.4774                  | 0.02                           | 37 | 1 |   |
|       | DLPDPYVSVLLLPDK                             | +2                       | 842.4769   | 1682.9392     | 1682.9131                  | 0.03                           | 34 | 1 |   |
| No.   | Protein                                     | Matched (SEQUEST MASCOT) | emPAI      | Strategy.Hits | PepMatched(SEQUEST MASCOT) | SpectraMatched(SEQUEST MASCOT) |    |   |   |
| 122.  | IPI00364890                                 | Y                        | Y          | 0.39          | 1                          | 4                              | 4  | 9 | 6 |
| *Des: | Similar to SPI6                             |                          |            |               |                            |                                |    |   |   |
|       | SEQUEST:(PepMatched Observed.Hits Coverage) |                          |            |               |                            |                                |    |   |   |
|       | Seq                                         | Charge                   | Xcor       | Delta         | Proability                 | PepHits                        |    |   |   |
|       | IPELLSGGSVDSETR                             | +2                       | 4.226      | 0.511         | 1.0000                     | 1                              |    |   |   |
|       | GQTQVQISQALGLNK                             | +2                       | 3.802      | 0.488         | 0.9998                     | 1                              |    |   |   |
|       | LGIVDFQEAK                                  | +2                       | 3.385      | 0.500         | 0.9998                     | 4                              |    |   |   |
|       | DLHQGFQLLSNLNKPER                           | +3                       | 4.590      | 0.564         | 1.0000                     | 3                              |    |   |   |
|       | MASCOT:(PepMatched Observed.Hits Coverage)  | 4                        | 1          | 16.53%        |                            |                                |    |   |   |
|       | Seq                                         | Charge                   | ObservedMS | ExpectedMS    | CalculatedMS               | Pepscore PepHits               |    |   |   |
|       | IPELLSGGSVDSETR                             | +2                       | 780.41     | 1558.80       | 1558.78                    | 0.02                           | 86 | 1 |   |
|       | GQTQVQISQALGLNK                             | +2                       | 792.94     | 1583.87       | 1583.86                    | 0.01                           | 87 | 1 |   |

Identified Human Platelet Proteins

|                   |    |        |         |         |      |    |   |  |
|-------------------|----|--------|---------|---------|------|----|---|--|
| LGIVDFQEAK        | +2 | 609.84 | 1217.67 | 1217.67 | 0    | 59 | 4 |  |
| DLHQGFQLLSNLNKPER | +3 | 708.06 | 2121.15 | 2121.13 | 0.02 | 58 | 3 |  |

No. 123. Protein IPI00231965 Matched (SEQUEST MASCOT) N Y emPAI Strategy.Hits 0.71 2 PepMatched(SEQUEST MASCOT) 0 4 SpectraMatched(SEQUEST MASCOT) 0 11

\*Des: ADP-ribosylation factor 5

SEQUEST:(PepMatched Observed.Hits Coverage)

|                                            |        |            |            |              |      |    |          |         |
|--------------------------------------------|--------|------------|------------|--------------|------|----|----------|---------|
| MASCOT:(PepMatched Observed.Hits Coverage) | 4      | 2          | 19.23%     |              |      |    |          |         |
| Seq                                        | Charge | ObservedMS | ExpectedMS | CalculatedMS |      |    | PepScore | PepHits |
| VQESADELQK                                 | +2     | 573.7900   | 1145.5654  | 1145.5564    | 0.01 | 43 | 1        |         |
| ILMVGLDAAGK                                | +2     | 544.3168   | 1086.6190  | 1086.6107    | 0.01 | 70 | 13       |         |
| KQMRILMVGLDAAGK                            | +3     | 544.3168   | 1629.9285  | 1629.9058    | 0.02 | 46 | 4        |         |
| LGLQHRLR+2                                 |        | 418.7610   | 835.5075   | 835.5028     | 0    | 50 | 1        |         |

No. 124. Protein IPI00198168 Matched (SEQUEST MASCOT) Y N emPAI Strategy.Hits 0.19 3 PepMatched(SEQUEST MASCOT) 3 0 SpectraMatched(SEQUEST MASCOT) 3 0

\*Des: 81 kDa protein

SEQUEST:(PepMatched Observed.Hits Coverage)

|                                            |        |       |       |            |         |  |  |  |
|--------------------------------------------|--------|-------|-------|------------|---------|--|--|--|
| MASCOT:(PepMatched Observed.Hits Coverage) | 3      | 3     | 6.86% |            |         |  |  |  |
| Seq                                        | Charge | Xcor  | Delta | Proability | PepHits |  |  |  |
| PLVETIFER                                  | +2     | 2.832 | 0.503 | 0.9986     | 2       |  |  |  |
| FSLIDLAGNER                                | +2     | 3.467 | 0.306 | 0.9981     | 1       |  |  |  |
| ALLEMTEEVVDYDVSATQLEAILEQK                 | +3     | 6.050 | 0.609 | 1.0000     | 1       |  |  |  |

No. 125. Protein IPI00231966 Matched (SEQUEST MASCOT) N Y emPAI Strategy.Hits 0.44 1 PepMatched(SEQUEST MASCOT) 0 2 SpectraMatched(SEQUEST MASCOT) 0 6

\*Des: ADP-ribosylation factor 4

SEQUEST:(PepMatched Observed.Hits Coverage)

|                                            |        |            |            |              |   |    |          |         |
|--------------------------------------------|--------|------------|------------|--------------|---|----|----------|---------|
| MASCOT:(PepMatched Observed.Hits Coverage) | 2      | 1          | 17.58%     |              |   |    |          |         |
| Seq                                        | Charge | ObservedMS | ExpectedMS | CalculatedMS |   |    | PepScore | PepHits |
| HYFQNTQGLIFVVDSNDRER                       | +3     | 813.3997   | 2437.1773  | 2437.1774    | 0 | 46 | 10       |         |
| IQEGAAVLQK                                 | +2     | 528.8080   | 1055.6015  | 1055.5975    | 0 | 47 | 1        |         |

No. 126. Protein IPI00193151 Matched (SEQUEST MASCOT) Y Y emPAI Strategy.Hits 0.29 1 PepMatched(SEQUEST MASCOT) 2 2 SpectraMatched(SEQUEST MASCOT) 2 2

\*Des: Dihydropteridine reductase

SEQUEST:(PepMatched Observed.Hits Coverage)

|                                            |        |            |            |              |         |    |          |         |
|--------------------------------------------|--------|------------|------------|--------------|---------|----|----------|---------|
| MASCOT:(PepMatched Observed.Hits Coverage) | 2      | 1          | 14.63%     |              |         |    |          |         |
| Seq                                        | Charge | Xcor       | Delta      | Proability   | PepHits |    |          |         |
| RPNSGSLIQVVTDDGK                           | +2     | 3.797      | 0.596      | 1.0000       | 2       |    |          |         |
| MTDSFTEQADQVTAEVGK                         | +2     | 4.791      | 0.579      | 1.0000       | 1       |    |          |         |
| MASCOT:(PepMatched Observed.Hits Coverage) | 2      | 1          | 14.63%     |              |         |    |          |         |
| Seq                                        | Charge | ObservedMS | ExpectedMS | CalculatedMS |         |    | PepScore | PepHits |
| RPNSGSLIQVVTDDGK                           | +2     | 836.46     | 1670.92    | 1670.90      | 0.02    | 75 | 2        |         |
| MTDSFTEQADQVTAEVGK                         | +2     | 978.96     | 1955.90    | 1955.88      | 0.02    | 92 | 1        |         |

No. 127. Protein IPI00231968 Matched (SEQUEST MASCOT) Y Y emPAI Strategy.Hits 0.35 1 PepMatched(SEQUEST MASCOT) 3 3 SpectraMatched(SEQUEST MASCOT) 3 6

Identified Human Platelet Proteins

\*Des: Annexin A4

| SEQUEST:(PepMatched Observed.Hits Coverage) |        |            |            |              |         |    |          |         |  |
|---------------------------------------------|--------|------------|------------|--------------|---------|----|----------|---------|--|
| Seq                                         | Charge | Xcor       | Delta      | Proability   | PepHits |    |          |         |  |
| VLVSLTAGGR                                  | +2     |            | 2.701      | 0.322        | 0.9894  | 2  |          |         |  |
| AASGFNATEDAQVLR                             | +2     |            | 3.880      | 0.475        | 0.9996  | 1  |          |         |  |
| SETSGSFEDALLAIVK                            | +2     |            | 4.567      | 0.549        | 1.0000  | 1  |          |         |  |
| MASCOT:(PepMatched Observed.Hits Coverage)  |        |            |            |              |         |    |          |         |  |
| Seq                                         | Charge | ObservedMS | ExpectedMS | CalculatedMS |         |    | Pepscore | PepHits |  |
| GLGTDDSTLIR                                 | +2     | 574.31     | 1146.60    | 1146.59      | 0.01    | 50 | 2        |         |  |
| AASGFNATEDAQVLR                             | +2     | 775.39     | 1548.76    | 1548.75      | 0.01    | 59 | 2        |         |  |
| SETSGSFEDALLAIVK                            | +2     | 833.93     | 1665.85    | 1665.85      | 0       | 74 | 2        |         |  |

| No.  | Protein     | Matched (SEQUEST MASCOT) | emPAI | Strategy.Hits | PepMatched(SEQUEST MASCOT) | SpectraMatched(SEQUEST MASCOT) |
|------|-------------|--------------------------|-------|---------------|----------------------------|--------------------------------|
| 128. | IPI00208568 | Y Y                      | 1.03  | 3             | 8 6 24 22                  |                                |

\*Des: PREDICTED: similar to pleckstrin

| SEQUEST:(PepMatched Observed.Hits Coverage) |        |            |            |              |         |     |          |         |  |
|---------------------------------------------|--------|------------|------------|--------------|---------|-----|----------|---------|--|
| Seq                                         | Charge | Xcor       | Delta      | Proability   | PepHits |     |          |         |  |
| GCVVTSVESNPDGK                              | +2     |            | 4.845      | 0.574        | 1.0000  | 4   |          |         |  |
| NRQEGLMISASLLSEGYLQPASDLSK                  | +3     |            | 4.872      | 0.610        | 1.0000  | 8   |          |         |  |
| EDPAYLHYYDPAGGEDPLGAIHLR                    | +3     |            | 6.063      | 0.515        | 1.0000  | 3   |          |         |  |
| GSVFNTWKPMWVVLLEDGIEFYK                     | +3     |            | 3.489      | 0.356        | 0.9997  | 4   |          |         |  |
| GSTLTSPCQDFGKR                              | +2     | 2.789      | 0.348      | 0.9922       | 2       |     |          |         |  |
| KFILREDPAYLHYYDPAGGEDPLGAIHLR               | +4     |            | 5.848      | 0.550        | 1.0000  | 11  |          |         |  |
| VFNHCFTGSGVIDWLVS NK                        | +2     |            | 5.554      | 0.626        | 1.0000  | 8   |          |         |  |
| GMIPKLGSTLTSPCQDFGK                         | +2     |            | 4.672      | 0.622        | 1.0000  | 3   |          |         |  |
| MASCOT:(PepMatched Observed.Hits Coverage)  |        |            |            |              |         |     |          |         |  |
| Seq                                         | Charge | ObservedMS | ExpectedMS | CalculatedMS |         |     | Pepscore | PepHits |  |
| LPETIDLGALYLSMKDPEK                         | +2     | 1067.0813  | 2132.1480  | 2132.1075    | 0.04    | 115 | 4        |         |  |
| EDPAYLHYYDPAGGEDPLGAIHLR                    | +3     | 890.4421   | 2668.3046  | 2668.2557    | 0.05    | 98  | 2        |         |  |
| GSVFNTWKPMWVVLLEDGIEFYK                     | +3     | 919.9932   | 2756.9577  | 2757.3875    | -0.42   | 52  | 8        |         |  |
| KGSVFNTWKPMWVVLLEDGIEFYK                    | +3     | 962.8497   | 2885.5272  | 2885.4825    | 0.04    | 54  | 2        |         |  |
| SDEENLFEIITADEVHYMQAATAK                    | +3     | 963.4688   | 2887.3846  | 2887.3221    | 0.06    | 61  | 2        |         |  |
| KSDEENLFEIITADEVHYMQAATAK                   | +3     | 1006.1652  | 3015.4738  | 3015.4171    | 0.06    | 112 | 2        |         |  |

| No.  | Protein     | Matched (SEQUEST MASCOT) | emPAI | Strategy.Hits | PepMatched(SEQUEST MASCOT) | SpectraMatched(SEQUEST MASCOT) |
|------|-------------|--------------------------|-------|---------------|----------------------------|--------------------------------|
| 129. | IPI00187747 | Y Y                      | 1.18  | 4             | 9 4 19 27                  |                                |

\*Des: Ras-related protein Rap-1A

| SEQUEST:(PepMatched Observed.Hits Coverage) |        |       |       |            |         |   |  |  |  |
|---------------------------------------------|--------|-------|-------|------------|---------|---|--|--|--|
| Seq                                         | Charge | Xcor  | Delta | Proability | PepHits |   |  |  |  |
| LVVLGSGGVGK                                 | +2     |       | 3.127 | 0.559      | 0.9955  | 4 |  |  |  |
| MREYKLVVLGSGGVGK                            | +2     |       | 5.029 | 0.570      | 0.9959  | 5 |  |  |  |
| VVGKEQQQLAR                                 | +2     |       | 3.116 | 0.568      | 0.9862  | 3 |  |  |  |
| SALTVQFVQGIFVEKYDPTIEDSYRK                  | +3     |       | 5.420 | 0.626      | 1.0000  | 4 |  |  |  |
| SALTVQFVQGIFVEK                             | +3     |       | 5.699 | 0.690      | 1.0000  | 3 |  |  |  |
| SALTVQFVQGIFVEKYDPTIEDSYR                   | +3     |       | 6.113 | 0.699      | 1.0000  | 1 |  |  |  |
| SKINVNEIFYDLVR                              | +2     | 4.415 | 0.622 | 1.0000     | 5       |   |  |  |  |
| INVNEIFYDLVRQINRK                           | +3     |       | 3.342 | 0.599      | 0.9991  | 2 |  |  |  |

Identified Human Platelet Proteins

| No.   | Protein                                                                | Matched (SEQUEST MASCOT) | emPAI      | Strategy.Hits | PepMatched(SEQUEST MASCOT) | SpectraMatched(SEQUEST MASCOT) |
|-------|------------------------------------------------------------------------|--------------------------|------------|---------------|----------------------------|--------------------------------|
| 130.  | IPI00364895                                                            | Y                        | Y          | 0.59          | 2                          | 9                              |
| *Des: | PREDICTED: similar to Mitochondrial inner membrane protein (Mitofilin) |                          |            |               |                            |                                |
|       | SEQUEST:(PepMatched Observed.Hits Coverage)                            | 9                        | 1          | 17.5%         |                            |                                |
|       | Seq                                                                    | Charge                   | ObservedMS | ExpectedMS    | CalculatedMS               | Pepscore PepHits               |
|       | LIVLGSGGVGK                                                            | +2                       | 493.31     | 984.60        | 984.60                     | 0 49 10                        |
|       | SALTVQFVQGIFVEK                                                        | +2                       | 833.47     | 1664.92       | 1664.91                    | 0.01 97 4                      |
|       | SKINVNEIFYDLVR                                                         | +2                       | 855.47     | 1708.92       | 1708.91                    | 0.01 68 4                      |
|       | SALTVQFVQGIFVEKYDPTIEDSYR                                              | +3                       | 969.16     | 2904.47       | 2904.45                    | 0.02 73 2                      |

| No.   | Protein                                             | Matched (SEQUEST MASCOT) | emPAI      | Strategy.Hits | PepMatched(SEQUEST MASCOT) | SpectraMatched(SEQUEST MASCOT) |
|-------|-----------------------------------------------------|--------------------------|------------|---------------|----------------------------|--------------------------------|
| 131.  | IPI00213172                                         | Y                        | Y          | 0.48          | 2                          | 5                              |
| *Des: | PREDICTED: similar to Phospholipid transfer protein |                          |            |               |                            |                                |
|       | SEQUEST:(PepMatched Observed.Hits Coverage)         | 5                        | 2          | 13.27%        |                            |                                |
|       | Seq                                                 | Charge                   | Xcor       | Delta         | Proability                 | PepHits                        |
|       | VVSQYHELVVQAR                                       | +2                       | 3.757      | 0.423         | 0.9997                     | 2                              |
|       | GIEQAVQSHAVAEER                                     | +2                       | 4.914      | 0.569         | 1.0000                     | 3                              |
|       | EIAGATPYITAAEEK                                     | +2                       | 2.772      | 0.411         | 0.9963                     | 1                              |
|       | AVDEAADALLK                                         | +2                       | 2.719      | 0.243         | 0.9762                     | 2                              |
|       | SLEDALNQTATVTR                                      | +2                       | 3.865      | 0.571         | 1.0000                     | 1                              |
|       | TSSAEMPTIPLGSAVEAIR                                 | +2                       | 4.066      | 0.506         | 0.9999                     | 1                              |
|       | LFGMVLGSAPYTVPLPK                                   | +2                       | 3.395      | 0.496         | 0.9997                     | 1                              |
|       | QTITAQNAAVQAVK                                      | +2                       | 3.634      | 0.471         | 0.9998                     | 1                              |
|       | NSLYQYFLSYLQSLLLFPPK                                | +3                       | 4.154      | 0.547         | 1.0000                     | 2                              |
|       | MASCOT:(PepMatched Observed.Hits Coverage)          | 9                        | 3          | 15.51%        |                            |                                |
|       | Seq                                                 | Charge                   | ObservedMS | ExpectedMS    | CalculatedMS               | Pepscore PepHits               |
|       | LSEQELEFHR                                          | +3                       | 429.88     | 1286.63       | 1286.63                    | 0 52 2                         |
|       | QTITAQNAAVQAVK                                      | +2                       | 721.90     | 1441.80       | 1441.79                    | 0.01 65 2                      |
|       | VVSQYHELVVQAR                                       | +2                       | 764.42     | 1526.83       | 1526.82                    | 0.01 47 4                      |
|       | GIEQAVQSHAVAEER                                     | +2                       | 912.46     | 1822.90       | 1822.88                    | 0.02 82 8                      |
|       | AVDEAADALLK                                         | +2                       | 558.30     | 1114.59       | 1114.59                    | 0 52 4                         |
|       | SLEDALNQTATVTR                                      | +2                       | 759.90     | 1517.78       | 1517.77                    | 0.01 74 2                      |
|       | EIAGATPYITAAEEK                                     | +2                       | 782.40     | 1562.79       | 1562.78                    | 0.01 45 2                      |
|       | FEFEQDLSEK                                          | +2                       | 636.29     | 1270.57       | 1270.57                    | 0 56 2                         |
|       | TSSAEMPTIPLGSAVEAIR                                 | +2                       | 965.51     | 1929.00       | 1928.99                    | 0.01 75 2                      |

| No.   | Protein                                             | Matched (SEQUEST MASCOT) | emPAI      | Strategy.Hits | PepMatched(SEQUEST MASCOT) | SpectraMatched(SEQUEST MASCOT) |
|-------|-----------------------------------------------------|--------------------------|------------|---------------|----------------------------|--------------------------------|
| 131.  | IPI00213172                                         | Y                        | Y          | 0.48          | 2                          | 5                              |
| *Des: | PREDICTED: similar to Phospholipid transfer protein |                          |            |               |                            |                                |
|       | SEQUEST:(PepMatched Observed.Hits Coverage)         | 5                        | 2          | 13.27%        |                            |                                |
|       | Seq                                                 | Charge                   | Xcor       | Delta         | Proability                 | PepHits                        |
|       | INMAFGGTFR                                          | +2                       | 2.564      | 0.277         | 0.9832                     | 2                              |
|       | FLEQELEDINIPDVYGA                                   | +2                       | 4.255      | 0.568         | 1.0000                     | 2                              |
|       | ATYFGSIVLQSPTVINSPLK                                | +2                       | 4.857      | 0.499         | 1.0000                     | 2                              |
|       | TLLQIGVMPDLLNER                                     | +2                       | 3.168      | 0.487         | 0.9996                     | 2                              |
|       | MYNFFSTFITSGMR                                      | +2                       | 4.834      | 0.695         | 1.0000                     | 1                              |
|       | MASCOT:(PepMatched Observed.Hits Coverage)          | 6                        | 3          | 12.78%        |                            |                                |
|       | Seq                                                 | Charge                   | ObservedMS | ExpectedMS    | CalculatedMS               | Pepscore PepHits               |
|       | VTSAALELVK                                          | +2                       | 516.26     | 1030.50       | 1029.61                    | 0.89 55 2                      |

**Identified Human Platelet Proteins**

|                |    |        |         |         |   |    |   |
|----------------|----|--------|---------|---------|---|----|---|
| INMAFGGTFR     | +2 | 557.28 | 1112.54 | 1112.54 | 0 | 49 | 2 |
| DPVVSNGNLDMEFR | +2 | 796.87 | 1591.73 | 1591.73 | 0 | 64 | 1 |
| VPNDLDMLLR     | +2 | 593.32 | 1184.62 | 1184.62 | 0 | 53 | 3 |
| TLLQIGVMPLLNER | +2 | 798.96 | 1595.91 | 1595.91 | 0 | 65 | 3 |
| MYNFFSTFITSGMR | +2 | 851.39 | 1700.77 | 1700.77 | 0 | 97 | 3 |

No. 132. Protein IPI00205157 Matched (SEQUEST MASCOT) Y N emPAI 0.42 Strategy.Hits 1 PepMatched (SEQUEST MASCOT) 2 SpectraMatched (SEQUEST MASCOT) 3

\*Des: Short chain 3-hydroxyacyl-CoA dehydrogenase, mitochondrial precursor

|                                             |        |       |        |
|---------------------------------------------|--------|-------|--------|
| SEQUEST:(PepMatched Observed.Hits Coverage) | 2      | 1     | 16.87% |
| Seq                                         | Charge | Xcor  | Delta  |
| LGAGYPMGPFELLDYVGLDTTK                      | +2     | 4.653 | 0.569  |
| TLSSLSTSTDAASVVHSTDLVVEAIVENLK              | +3     | 5.762 | 0.654  |
| MASCOT:(PepMatched Observed.Hits Coverage)  |        |       |        |

No. 133. Protein IPI00558635 Matched (SEQUEST MASCOT) N Y emPAI 0.77 Strategy.Hits 1 PepMatched (SEQUEST MASCOT) 0 SpectraMatched (SEQUEST MASCOT) 5

\*Des: 43 kDa protein

|                                             |        |              |            |
|---------------------------------------------|--------|--------------|------------|
| SEQUEST:(PepMatched Observed.Hits Coverage) |        |              |            |
| MASCOT:(PepMatched Observed.Hits Coverage)  | 5      | 1            | 17.09%     |
| Seq                                         | Charge | ObservedMS   | ExpectedMS |
| AGIATHFVDSEK                                | +2     | 637.83       | 1273.65    |
| AGQTLSQDLFR                                 | +2     | 617.35       | 1232.69    |
| SPSAEDVAGVLESYHAK                           | +2     | 880.44       | 1758.86    |
| DPDTFLIIK                                   | +2     | 587.84       | 1173.67    |
| LHVLEEEELLALK                               | +2     | 703.92       | 1405.83    |
|                                             |        | CalculatedMS | Pepscore   |
|                                             |        | 70           | 12         |
|                                             |        | -1.93        | 3          |
|                                             |        | 0.02         | 67         |
|                                             |        | 0.01         | 8          |
|                                             |        | 0.01         | 6          |

No. 134. Protein IPI00566583 Matched (SEQUEST MASCOT) N Y emPAI 1.12 Strategy.Hits 2 PepMatched (SEQUEST MASCOT) 0 SpectraMatched (SEQUEST MASCOT) 9

\*Des: Malate dehydrogenase, mitochondrial

|                                             |        |              |            |
|---------------------------------------------|--------|--------------|------------|
| SEQUEST:(PepMatched Observed.Hits Coverage) |        |              |            |
| MASCOT:(PepMatched Observed.Hits Coverage)  | 9      | 3            | 38.95%     |
| Seq                                         | Charge | ObservedMS   | ExpectedMS |
| VNVPVIGGHAGK                                | +2     | 574.33       | 1146.65    |
| ANTFVAELK                                   | +2     | 496.77       | 991.53     |
| AGAGSATLSMAYAGAR                            | +2     | 727.86       | 1453.70    |
| MIAEAIPELK                                  | +2     | 557.81       | 1113.61    |
| VDFPQDQLATLTGR                              | +2     | 780.91       | 1559.80    |
| IFGVTTLDIVR                                 | +2     | 617.36       | 1232.71    |
| FVFSLV DAMNGK                               | +2     | 664.34       | 1326.67    |
| LTLYDIAHTPGVAADLSHIETR                      | +3     | 798.42       | 2392.25    |
| VAVLGASGGIGQPLSLLLK                         | +2     | 897.05       | 1792.09    |
|                                             |        | CalculatedMS | Pepscore   |
|                                             |        | 59           | 10         |
|                                             |        | 59           | 3          |
|                                             |        | 1453.70      | 90         |
|                                             |        | 0            | 14         |
|                                             |        | 47           | 4          |
|                                             |        | 0.01         | 4          |
|                                             |        | 0            | 5          |
|                                             |        | 86           | 4          |
|                                             |        | 0.01         | 56         |
|                                             |        | 0.01         | 1          |
|                                             |        | 104          | 6          |

No. 135. Protein IPI00204359 Matched (SEQUEST MASCOT) Y Y emPAI 2.34 Strategy.Hits 3 PepMatched (SEQUEST MASCOT) 3 SpectraMatched (SEQUEST MASCOT) 11

\*Des: Beta-2-microglobulin precursor

|                                             |   |   |        |
|---------------------------------------------|---|---|--------|
| SEQUEST:(PepMatched Observed.Hits Coverage) | 3 | 2 | 21.48% |
|---------------------------------------------|---|---|--------|

Identified Human Platelet Proteins

| Seq                                        | Charge | Xcor       | Delta      | Probability  | PepHits |    |   |        |  |  |
|--------------------------------------------|--------|------------|------------|--------------|---------|----|---|--------|--|--|
| KIPNIEMSDLFSK                              | +3     |            | 3.459      | 0.407        | 1.0000  | 4  |   |        |  |  |
| HVTLKEPK                                   | +2     |            | 2.924      | 0.361        | 0.9930  | 26 |   |        |  |  |
| VKHVTLKEPK                                 | +2     |            | 3.301      | 0.389        | 0.9961  | 7  |   |        |  |  |
| MASCOT:(PepMatched Observed.Hits Coverage) |        |            |            |              |         | 3  | 4 | 20.66% |  |  |
| Seq                                        | Charge | ObservedMS | ExpectedMS | CalculatedMS |         |    |   |        |  |  |
| TPQIQVYSR                                  | +2     | 546.2571   | 1090.4997  | 1090.5771    | -0.07   | 67 | 3 |        |  |  |
| IPNIEMSDLFSK                               | +2     | 740.8844   | 1479.7542  | 1479.7279    | 0.03    | 79 | 2 |        |  |  |
| KIPNIEMSDLFSK                              | +2     | 804.9322   | 1607.8498  | 1607.8228    | 0.03    | 84 | 2 |        |  |  |

No. 136. Protein IPI00558494 Matched (SEQUEST MASCOT) N Y emPAI 2.14 Strategy.Hits 1 PepMatched(SEQUEST MASCOT) 0 SpectraMatched(SEQUEST MASCOT) 4 0 8  
 \*Des: PREDICTED: similar to ARP2/3 complex 16 kDa subunit (p16-ARC) (Actin-related protein 2/3 complex subunit 5)

| SEQUEST:(PepMatched Observed.Hits Coverage) |        |            |            |              |         |      |    |   |  |  |
|---------------------------------------------|--------|------------|------------|--------------|---------|------|----|---|--|--|
| MASCOT:(PepMatched Observed.Hits Coverage)  |        |            |            |              |         |      |    |   |  |  |
| Seq                                         | Charge | ObservedMS | ExpectedMS | CalculatedMS |         |      |    |   |  |  |
| ALAAGGVGSIVR                                | +2     | 535.82     | 1069.62    | 1069.62      | 0       | 77   | 4  |   |  |  |
| AVQSLDKNGVDLLMK                             | +2     |            | 815.95     | 1629.88      | 1629.88 | 0    | 45 | 6 |  |  |
| YIYKGFESPSDNSSAMLLQWHEK                     | +3     |            | 910.77     | 2729.27      | 2729.28 | 0    | 49 | 4 |  |  |
| AVQSLDKNGVDLLMKYIYK                         | +3     |            | 733.40     | 2197.19      | 2197.18 | 0.01 | 55 | 2 |  |  |

No. 137. Protein IPI00190759 Matched (SEQUEST MASCOT) Y Y emPAI 0.62 Strategy.Hits 3 PepMatched(SEQUEST MASCOT) 10 SpectraMatched(SEQUEST MASCOT) 2 52 4  
 \*Des: Splice Isoform Gamma-B of Fibrinogen gamma chain precursor

| SEQUEST:(PepMatched Observed.Hits Coverage) |        |            |            |              |           |        |    |        |  |  |
|---------------------------------------------|--------|------------|------------|--------------|-----------|--------|----|--------|--|--|
| Seq                                         | Charge | Xcor       | Delta      | Probability  | PepHits   |        |    |        |  |  |
| YLQDIYTSNK                                  | +2     |            | 3.711      | 0.457        | 0.9999    | 10     |    |        |  |  |
| LSIGDGQQHHMGGSK                             | +2     |            | 3.052      | 0.533        | 0.9998    | 3      |    |        |  |  |
| TSTADYAMFR                                  | +2     |            | 3.325      | 0.573        | 1.0000    | 5      |    |        |  |  |
| AIQVYYNPDQPPKPGMIEGATQK                     | +2     |            |            | 4.589        | 0.535     | 1.0000 | 6  |        |  |  |
| FFTSHNGMHFSTWDNDNDK                         | +3     |            | 4.705      | 0.554        | 1.0000    | 2      |    |        |  |  |
| YEALLLTHESSIR                               | +2     |            | 4.330      | 0.526        | 1.0000    | 4      |    |        |  |  |
| EGFGHLSPTGTTEFWLGNEK                        | +2     |            | 5.563      | 0.594        | 1.0000    | 3      |    |        |  |  |
| SSTPNGYDNGIHWATWK                           | +2     |            | 5.076      | 0.497        | 1.0000    | 3      |    |        |  |  |
| LTYAYFIGGDAGDAFDGYDFGDDPSDK                 | +2     |            | 6.246      | 0.709        | 1.0000    | 1      |    |        |  |  |
| MVEEILKYEALLLTHESSIR                        | +3     |            | 5.511      | 0.548        | 1.0000    | 2      |    |        |  |  |
| MASCOT:(PepMatched Observed.Hits Coverage)  |        |            |            |              |           | 2      | 1  | 10.15% |  |  |
| Seq                                         | Charge | ObservedMS | ExpectedMS | CalculatedMS |           |        |    |        |  |  |
| DNCCILDER                                   | +2     | 539.7262   | 1077.4378  | 1079.4376    | -1.99     | 35     | 2  |        |  |  |
| FGSYCPTTCGISDFLNSYQTDVDTLQTLLENILQR         | +3     |            | 1319.2954  | 3954.8644    | 3956.8084 | -1.93  | 43 | 2      |  |  |

No. 138. Protein IPI00421428 Matched (SEQUEST MASCOT) Y Y emPAI 0.71 Strategy.Hits 3 PepMatched(SEQUEST MASCOT) 5 SpectraMatched(SEQUEST MASCOT) 4 17 14  
 \*Des: Pgam1 protein

| SEQUEST:(PepMatched Observed.Hits Coverage) |        |      |       |             |         |   |  |  |  |  |
|---------------------------------------------|--------|------|-------|-------------|---------|---|--|--|--|--|
| Seq                                         | Charge | Xcor | Delta | Probability | PepHits |   |  |  |  |  |
| ALPFWNEEIVPQIK                              | +2     |      | 3.977 | 0.298       | 0.9989  | 5 |  |  |  |  |



Identified Human Platelet Proteins

|                                            |                                             |                            |            |                 |                              |                                  |          |         |
|--------------------------------------------|---------------------------------------------|----------------------------|------------|-----------------|------------------------------|----------------------------------|----------|---------|
|                                            | HLEGLSEEAIMELNLPTGIPIVYELDK                 | +3                         | 5.133      | 0.506           | 1.0000                       | 1                                |          |         |
|                                            | HGESAWNLENR                                 | +2                         | 3.953      | 0.354           | 0.9998                       | 7                                |          |         |
|                                            | FSGWYDADLSPAGHEEAK                          | +2                         | 5.378      | 0.390           | 1.0000                       | 5                                |          |         |
|                                            | NLKPIKPMQFLGDEETVR                          | +2                         | 4.448      | 0.642           | 1.0000                       | 5                                |          |         |
| MASCOT:(PepMatched Observed.Hits Coverage) |                                             | 4                          | 3          |                 | 25.09%                       |                                  |          |         |
|                                            | Seq                                         | Charge                     | ObservedMS | ExpectedMS      | CalculatedMS                 |                                  | PepScore | PepHits |
|                                            | HGESAWNLENR                                 | +2                         | 656.81     | 1311.61         | 1311.60                      | 0.01                             | 74       | 5       |
|                                            | FSGWYDADLSPAGHEEAK                          | +2                         | 990.45     | 1978.89         | 1978.87                      | 0.02                             | 107      | 5       |
|                                            | NLKPIKPMQFLGDEETVR                          | +3                         | 705.72     | 2114.13         | 2114.12                      | 0.01                             | 52       | 2       |
|                                            | ALPFWNEEIVPQIK                              | +2                         | 842.47     | 1682.92         | 1682.90                      | 0.02                             | 67       | 5       |
| No. 139.                                   | Protein IPI00200147                         | Matched (SEQUENT MASCOT) Y | emPAI 0.68 | Strategy.Hits 1 | PepMatched(SEQUEST MASCOT) 3 | SpectraMatched(SEQUEST MASCOT) 2 | 5        | 5       |
| *Des:                                      | 60S acidic ribosomal protein P0             |                            |            |                 |                              |                                  |          |         |
|                                            | SEQUENT:(PepMatched Observed.Hits Coverage) |                            | 3          | 2               | 13%                          |                                  |          |         |
|                                            | Seq                                         | Charge                     | Xcor       | Delta           | Probility                    | PepHits                          |          |         |
|                                            | IIQLDDYPK                                   | +2                         | 3.526      | 0.448           | 0.9998                       | 1                                |          |         |
|                                            | VLALSVETDYTFPLAEK                           | +2                         | 3.806      | 0.515           | 0.9999                       | 2                                |          |         |
|                                            | TSFFQALGITTK                                | +2                         | 3.072      | 0.543           | 0.9998                       | 2                                |          |         |
| MASCOT:(PepMatched Observed.Hits Coverage) |                                             | 2                          | 2          |                 | 9.9%                         |                                  |          |         |
|                                            | Seq                                         | Charge                     | ObservedMS | ExpectedMS      | CalculatedMS                 |                                  | PepScore | PepHits |
|                                            | GTIEILSDVQLIK                               | +2                         | 714.92     | 1427.83         | 1427.82                      | 0.01                             | 60       | 3       |
|                                            | VLALSVETDYTFPLAEK                           | +2                         | 948.51     | 1895.01         | 1894.99                      | 0.02                             | 83       | 3       |
| No. 140.                                   | Protein IPI00421429                         | Matched (SEQUENT MASCOT) Y | emPAI 0.02 | Strategy.Hits 1 | PepMatched(SEQUEST MASCOT) 2 | SpectraMatched(SEQUEST MASCOT) 4 | 3        | 6       |
| *Des:                                      | Plakoglobin                                 |                            |            |                 |                              |                                  |          |         |
|                                            | SEQUENT:(PepMatched Observed.Hits Coverage) |                            | 2          | 1               | 3.56%                        |                                  |          |         |
|                                            | Seq                                         | Charge                     | Xcor       | Delta           | Probility                    | PepHits                          |          |         |
|                                            | VSVELTNSLFK                                 | +2                         | 3.128      | 0.459           | 1.0000                       | 1                                |          |         |
|                                            | NEGATYAAAVLFR                               | +2                         | 3.007      | 0.292           | 0.9923                       | 2                                |          |         |
| MASCOT:(PepMatched Observed.Hits Coverage) |                                             | 4                          | 1          |                 | 6.99%                        |                                  |          |         |
|                                            | Seq                                         | Charge                     | ObservedMS | ExpectedMS      | CalculatedMS                 |                                  | PepScore | PepHits |
|                                            | LNYGIPAIVK                                  | +2                         | 544.2744   | 1086.5343       | 1086.6437                    | -0.1                             | 41       | 3       |
|                                            | VSVELTNSLFK                                 | +2                         | 618.8446   | 1235.6747       | 1235.6761                    | 0                                | 51       | 1       |
|                                            | ALMGSPQLVAAVVR                              | +2                         | 706.4079   | 1410.8012       | 1410.8016                    | 0                                | 46       | 1       |
|                                            | NEGATYAAAVLFR                               | +2                         | 742.3823   | 1482.7501       | 1482.7466                    | 0                                | 52       | 2       |
| No. 141.                                   | Protein IPI00421357                         | Matched (SEQUENT MASCOT) Y | emPAI 0.04 | Strategy.Hits 1 | PepMatched(SEQUEST MASCOT) 2 | SpectraMatched(SEQUEST MASCOT) 0 | 2        | 0       |
| *Des:                                      | 170 kDa protein                             |                            |            |                 |                              |                                  |          |         |
|                                            | SEQUENT:(PepMatched Observed.Hits Coverage) |                            | 2          | 1               | 1.88%                        |                                  |          |         |
|                                            | Seq                                         | Charge                     | Xcor       | Delta           | Probility                    | PepHits                          |          |         |
|                                            | DQVDSAVQELLQLK                              | +2                         | 4.324      | 0.355           | 0.9994                       | 1                                |          |         |
|                                            | GVLEDIQLNLFTR                               | +2                         | 3.246      | 0.339           | 0.9965                       | 1                                |          |         |
| MASCOT:(PepMatched Observed.Hits Coverage) |                                             |                            |            |                 |                              |                                  |          |         |

**Identified Human Platelet Proteins**

|              |                                                    |                                 |                   |                      |                                   |                                       |        |                 |                |  |
|--------------|----------------------------------------------------|---------------------------------|-------------------|----------------------|-----------------------------------|---------------------------------------|--------|-----------------|----------------|--|
| <b>No.</b>   | <b>Protein</b>                                     | <b>Matched (SEQUEST MASCOT)</b> | <b>emPAI</b>      | <b>Strategy.Hits</b> | <b>PepMatched(SEQUEST MASCOT)</b> | <b>SpectraMatched(SEQUEST MASCOT)</b> |        |                 |                |  |
| 142.         | IPI00369117                                        | Y Y                             | 0.78              | 1                    | 4                                 | 3                                     | 6      | 3               |                |  |
| <b>*Des:</b> | PREDICTED: similar to LDL receptor adaptor protein |                                 |                   |                      |                                   |                                       |        |                 |                |  |
|              | SEQUEST:(PepMatched Observed.Hits Coverage)        |                                 |                   |                      | 4                                 | 1                                     | 17.89% |                 |                |  |
|              | <b>Seq</b>                                         | <b>Charge</b>                   | <b>Xcor</b>       | <b>Delta</b>         | <b>Proability</b>                 | <b>PepHits</b>                        |        |                 |                |  |
|              | VAQAVTLTVAQAFK                                     | +2                              |                   | 2.733                | 0.333                             | 0.9913                                | 2      |                 |                |  |
|              | TSVATGNLLDLEELAK                                   |                                 |                   | +2                   | 3.800                             | 0.454                                 | 0.9997 | 1               |                |  |
|              | VAFEFWQVSK                                         | +2                              |                   | 2.997                | 0.393                             | 0.9989                                | 3      |                 |                |  |
|              | ETLLEGMVFSLK                                       | +2                              |                   | 3.438                | 0.512                             | 0.9998                                | 1      |                 |                |  |
|              | MASCOT:(PepMatched Observed.Hits Coverage)         |                                 |                   |                      | 3                                 | 1                                     | 13.09% |                 |                |  |
|              | <b>Seq</b>                                         | <b>Charge</b>                   | <b>ObservedMS</b> | <b>ExpectedMS</b>    | <b>CalculatedMS</b>               |                                       |        | <b>Pepscore</b> | <b>PepHits</b> |  |
|              | VAFEFWQVSK                                         | +2                              | 620.83            | 1239.64              | 1239.63                           | 0.01                                  | 41     | 4               |                |  |
|              | TSVATGNLLDLEELAK                                   | +2                              |                   | 837.46               | 1672.91                           | 1672.89                               | 0.02   | 64              | 1              |  |
|              | ETLLEGMVFSLK                                       | +2                              | 683.88            | 1365.74              | 1365.72                           | 0.02                                  | 54     | 1               |                |  |

|              |                                             |                                 |              |                      |                                   |                                       |        |   |  |  |
|--------------|---------------------------------------------|---------------------------------|--------------|----------------------|-----------------------------------|---------------------------------------|--------|---|--|--|
| <b>No.</b>   | <b>Protein</b>                              | <b>Matched (SEQUEST MASCOT)</b> | <b>emPAI</b> | <b>Strategy.Hits</b> | <b>PepMatched(SEQUEST MASCOT)</b> | <b>SpectraMatched(SEQUEST MASCOT)</b> |        |   |  |  |
| 143.         | IPI00367445                                 | Y N                             | 0.3          | 2                    | 4                                 | 0                                     | 6      | 0 |  |  |
| <b>*Des:</b> | 48 kDa protein                              |                                 |              |                      |                                   |                                       |        |   |  |  |
|              | SEQUEST:(PepMatched Observed.Hits Coverage) |                                 |              |                      | 4                                 | 2                                     | 17.84% |   |  |  |
|              | <b>Seq</b>                                  | <b>Charge</b>                   | <b>Xcor</b>  | <b>Delta</b>         | <b>Proability</b>                 | <b>PepHits</b>                        |        |   |  |  |
|              | GMGGAMDLVSSSK                               | +2                              |              | 3.596                | 0.549                             | 0.9995                                | 2      |   |  |  |
|              | GGHVNLTM LGAMQVSK                           |                                 |              | +3                   | 3.770                             | 0.338                                 | 0.9988 | 1 |  |  |
|              | AAGTTVVEVEEIVDIGSFAPEDIHIPK                 |                                 |              | +3                   | 4.688                             | 0.482                                 | 0.9999 | 2 |  |  |
|              | DLTAVSNNAGVDNFGLG LLLR                      | +2                              |              | 5.916                | 0.447                             | 1.0000                                | 2      |   |  |  |
|              | MASCOT:(PepMatched Observed.Hits Coverage)  |                                 |              |                      |                                   |                                       |        |   |  |  |

|              |                                                                                      |                                 |              |                      |                                   |                                       |       |   |  |  |
|--------------|--------------------------------------------------------------------------------------|---------------------------------|--------------|----------------------|-----------------------------------|---------------------------------------|-------|---|--|--|
| <b>No.</b>   | <b>Protein</b>                                                                       | <b>Matched (SEQUEST MASCOT)</b> | <b>emPAI</b> | <b>Strategy.Hits</b> | <b>PepMatched(SEQUEST MASCOT)</b> | <b>SpectraMatched(SEQUEST MASCOT)</b> |       |   |  |  |
| 144.         | IPI00365914                                                                          | Y N                             | 0.14         | 1                    | 2                                 | 0                                     | 2     | 0 |  |  |
| <b>*Des:</b> | PREDICTED: similar to Tryptophanyl-tRNA synthetase (Tryptophan--tRNA ligase) (TrpRS) |                                 |              |                      |                                   |                                       |       |   |  |  |
|              | SEQUEST:(PepMatched Observed.Hits Coverage)                                          |                                 |              |                      | 2                                 | 1                                     | 6.12% |   |  |  |
|              | <b>Seq</b>                                                                           | <b>Charge</b>                   | <b>Xcor</b>  | <b>Delta</b>         | <b>Proability</b>                 | <b>PepHits</b>                        |       |   |  |  |
|              | DMNQILDAYENK                                                                         | +2                              |              | 3.428                | 0.348                             | 0.9987                                | 1     |   |  |  |
|              | DLTLEQAYSYTVENAK                                                                     | +2                              |              | 4.073                | 0.585                             | 1.0000                                | 1     |   |  |  |
|              | MASCOT:(PepMatched Observed.Hits Coverage)                                           |                                 |              |                      |                                   |                                       |       |   |  |  |

|              |                                             |                                 |                   |                      |                                   |                                       |        |                 |                |  |
|--------------|---------------------------------------------|---------------------------------|-------------------|----------------------|-----------------------------------|---------------------------------------|--------|-----------------|----------------|--|
| <b>No.</b>   | <b>Protein</b>                              | <b>Matched (SEQUEST MASCOT)</b> | <b>emPAI</b>      | <b>Strategy.Hits</b> | <b>PepMatched(SEQUEST MASCOT)</b> | <b>SpectraMatched(SEQUEST MASCOT)</b> |        |                 |                |  |
| 145.         | IPI00231106                                 | Y Y                             | 1.84              | 1                    | 5                                 | 5                                     | 6      | 7               |                |  |
| <b>*Des:</b> | 3-mercaptopyruvate sulfurtransferase        |                                 |                   |                      |                                   |                                       |        |                 |                |  |
|              | SEQUEST:(PepMatched Observed.Hits Coverage) |                                 |                   |                      | 5                                 | 1                                     | 26.57% |                 |                |  |
|              | <b>Seq</b>                                  | <b>Charge</b>                   | <b>Xcor</b>       | <b>Delta</b>         | <b>Proability</b>                 | <b>PepHits</b>                        |        |                 |                |  |
|              | THEDILENL DAR                               | +2                              |                   | 3.056                | 0.473                             | 0.9991                                | 2      |                 |                |  |
|              | YWLSQNLPISSGK                               | +2                              |                   | 3.980                | 0.586                             | 1.0000                                | 1      |                 |                |  |
|              | LLDASWYLPK                                  | +2                              |                   | 3.411                | 0.399                             | 0.9927                                | 3      |                 |                |  |
|              | ALVSAQWVAEALK                               | +2                              |                   | 3.271                | 0.390                             | 0.9978                                | 1      |                 |                |  |
|              | DGIEPGHIPGSVNIPFTEFLTSEGLEK                 |                                 |                   | +3                   | 6.642                             | 0.571                                 | 1.0000 | 1               |                |  |
|              | MASCOT:(PepMatched Observed.Hits Coverage)  |                                 |                   |                      | 5                                 | 1                                     | 26.57% |                 |                |  |
|              | <b>Seq</b>                                  | <b>Charge</b>                   | <b>ObservedMS</b> | <b>ExpectedMS</b>    | <b>CalculatedMS</b>               |                                       |        | <b>Pepscore</b> | <b>PepHits</b> |  |

Identified Human Platelet Proteins

|                             |    |        |         |         |         |      |    |   |
|-----------------------------|----|--------|---------|---------|---------|------|----|---|
| THEDILENLDAR                | +2 | 713.35 | 1424.69 | 1424.69 | 0       | 54   | 2  |   |
| LLDASWYLPK                  | +2 | 603.81 | 1205.60 | 1204.65 | 0.95    | 51   | 2  |   |
| ALVSAQWVAEALK               | +2 | 694.34 | 1386.67 | 1384.77 | 1.9     | 79   | 2  |   |
| YWLSQNLPISSGK               | +2 | 746.89 | 1491.77 | 1491.77 | 0       | 77   | 1  |   |
| DGIEPGHIPGSVNIPFTEFLTSEGLEK | +3 |        | 961.82  | 2882.45 | 2882.43 | 0.02 | 87 | 1 |

No. 146. Protein IPI00372125 Matched (SEQUEST MASCOT) Y Y emPAI 0.11 Strategy.Hits 1 PepMatched(SEQUEST MASCOT) 3 SpectraMatched(SEQUEST MASCOT) 6

\*Des: PREDICTED: similar to T-Brain-1

|                                             |            |              |                  |
|---------------------------------------------|------------|--------------|------------------|
| SEQUEST:(PepMatched Observed.Hits Coverage) | 3          | 1            | 5.3%             |
| Seq Charge Xcor Delta                       | Probility  | PepHits      |                  |
| AVEEEDKMTPEQLAIK                            | +2         | 4.372        | 0.400            |
| VIDVFAMPQSGTGVSVEAVDPVFQAK                  | +3         | 3.901        | 0.500            |
| AGVPMMEVMGLMLGEFVDDYTVR                     | +2         | 5.846        | 0.602            |
| MASCOT:(PepMatched Observed.Hits Coverage)  | 2          | 1            | 3.16%            |
| Seq Charge ObservedMS                       | ExpectedMS | CalculatedMS | Pepscore PepHits |
| AVEEEDKMTPEQLAIK                            | +2         | 915.96       | 1829.91          |
| AGVPMMEVMGLMLGEFVDDYTVR                     | +3         | 810.39       | 2428.14          |

No. 147. Protein IPI00365918 Matched (SEQUEST MASCOT) Y N emPAI 0.06 Strategy.Hits 2 PepMatched(SEQUEST MASCOT) 2 SpectraMatched(SEQUEST MASCOT) 3

\*Des: PREDICTED: similar to RIKEN cDNA 2610204M08

|                                             |           |         |       |
|---------------------------------------------|-----------|---------|-------|
| SEQUEST:(PepMatched Observed.Hits Coverage) | 2         | 2       | 2.52% |
| Seq Charge Xcor Delta                       | Probility | PepHits |       |
| SFSEDAVTDSSSGTLPRL                          | +2        | 3.585   | 0.559 |
| KQQLAEEEEAR                                 | +2        | 3.096   | 0.344 |
| MASCOT:(PepMatched Observed.Hits Coverage)  |           |         |       |

No. 148. Protein IPI00231108 Matched (SEQUEST MASCOT) Y Y emPAI 0.56 Strategy.Hits 1 PepMatched(SEQUEST MASCOT) 3 SpectraMatched(SEQUEST MASCOT) 4

\*Des: 5'-AMP-activated protein kinase, beta-1 subunit

|                                             |            |              |                  |
|---------------------------------------------|------------|--------------|------------------|
| SEQUEST:(PepMatched Observed.Hits Coverage) | 3          | 1            | 20.8%            |
| Seq Charge Xcor Delta                       | Probility  | PepHits      |                  |
| APEKEEFLAWQHDLEVNEK                         | +3         | 3.677        | 0.462            |
| SQNNFVAILDLPEGEHQYK                         | +3         | 4.292        | 0.370            |
| APPILPPHLLQVILNK                            | +3         | 2.620        | 0.461            |
| MASCOT:(PepMatched Observed.Hits Coverage)  | 2          | 1            | 11.67%           |
| Seq Charge ObservedMS                       | ExpectedMS | CalculatedMS | Pepscore PepHits |
| DGVMVLSATHR                                 | +2         | 593.31       | 1184.61          |
| SQNNFVAILDLPEGEHQYK                         | +3         | 734.70       | 2201.08          |

No. 149. Protein IPI00208645 Matched (SEQUEST MASCOT) Y Y emPAI 0.46 Strategy.Hits 1 PepMatched(SEQUEST MASCOT) 2 SpectraMatched(SEQUEST MASCOT) 3

\*Des: LOC84013 protein

|                                             |           |         |        |
|---------------------------------------------|-----------|---------|--------|
| SEQUEST:(PepMatched Observed.Hits Coverage) | 2         | 1       | 10.37% |
| Seq Charge Xcor Delta                       | Probility | PepHits |        |
| LGEWAVVTGGTDGIGK                            | +2        | 4.277   | 0.513  |

Identified Human Platelet Proteins

|       |                                                  |                          |             |               |                            |                                |    |          |         |
|-------|--------------------------------------------------|--------------------------|-------------|---------------|----------------------------|--------------------------------|----|----------|---------|
|       | GIFVQSVLPFFVATK +2                               | 4.700                    | 0.477       | 0.9998        | 2                          |                                |    |          |         |
|       | MASCOT:(PepMatched Observed.Hits Coverage)       | 2                        | 1           | 10.37%        |                            |                                |    |          |         |
|       | Seq Charge ObservedMS                            |                          | ExpectedMS  | CalculatedMS  |                            |                                |    | PepScore | PepHits |
|       | LGEWAVVTGGTDGIGK                                 | +2                       | 780.41      | 1558.81       | 1558.80                    | 0.01                           | 89 | 2        |         |
|       | GIFVQSVLPFFVATK +2                               | 826.97                   | 1651.93     | 1651.93       | 0                          | 76                             | 2  |          |         |
| No.   | Protein                                          | Matched (SEQUEST MASCOT) | emPAI       | Strategy.Hits | PepMatched(SEQUEST MASCOT) | SpectraMatched(SEQUEST MASCOT) |    |          |         |
| 150.  | IPI00196645                                      | Y                        | Y           | 0.35          | 1                          | 4                              | 4  | 9        | 18      |
| *Des: | 5'-AMP-activated protein kinase, gamma-1 subunit |                          |             |               |                            |                                |    |          |         |
|       | SEQUEST:(PepMatched Observed.Hits Coverage)      | 4                        | 1           | 16.36%        |                            |                                |    |          |         |
|       | Seq Charge Xcor Delta                            |                          | Probability | PepHits       |                            |                                |    |          |         |
|       | TYNNLDVSVTK                                      | +2                       | 3.076       | 0.495         | 0.9997                     | 3                              |    |          |         |
|       | LVVVDEHDVVK                                      | +2                       | 2.790       | 0.282         | 0.9895                     | 10                             |    |          |         |
|       | LPVIDPESGNTLYILTHK                               | +3                       | 4.538       | 0.582         | 1.0000                     | 2                              |    |          |         |
|       | AFFALVTNGVR                                      | +2                       | 3.772       | 0.439         | 0.9998                     | 3                              |    |          |         |
|       | MASCOT:(PepMatched Observed.Hits Coverage)       | 4                        | 1           | 16.07%        |                            |                                |    |          |         |
|       | Seq Charge ObservedMS                            |                          | ExpectedMS  | CalculatedMS  |                            |                                |    | PepScore | PepHits |
|       | TYNNLDVSVTK                                      | +2                       | 627.33      | 1252.64       | 1252.63                    | 0.01                           | 60 | 6        |         |
|       | FDVINLAAEK                                       | +2                       | 560.31      | 1118.60       | 1118.60                    | 0                              | 42 | 4        |         |
|       | AFFALVTNGVR                                      | +2                       | 597.84      | 1193.66       | 1193.66                    | 0                              | 76 | 6        |         |
|       | LPVIDPESGNTLYILTHK                               | +3                       | 670.71      | 2009.10       | 2009.08                    | 0.02                           | 78 | 4        |         |
| No.   | Protein                                          | Matched (SEQUEST MASCOT) | emPAI       | Strategy.Hits | PepMatched(SEQUEST MASCOT) | SpectraMatched(SEQUEST MASCOT) |    |          |         |
| 151.  | IPI00231038                                      | Y                        | Y           | 0.66          | 1                          | 2                              | 2  | 4        | 5       |
| *Des: | 26S proteasome non-ATPase regulatory subunit 9   |                          |             |               |                            |                                |    |          |         |
|       | SEQUEST:(PepMatched Observed.Hits Coverage)      | 2                        | 1           | 9.29%         |                            |                                |    |          |         |
|       | Seq Charge Xcor Delta                            |                          | Probability | PepHits       |                            |                                |    |          |         |
|       | ANYDVLESQK                                       | +2                       | 3.001       | 0.462         | 0.9998                     | 4                              |    |          |         |
|       | ADVDLYQVR                                        | +2                       | 3.569       | 0.226         | 0.9977                     | 3                              |    |          |         |
|       | MASCOT:(PepMatched Observed.Hits Coverage)       | 2                        | 1           | 9.29%         |                            |                                |    |          |         |
|       | Seq Charge ObservedMS                            |                          | ExpectedMS  | CalculatedMS  |                            |                                |    | PepScore | PepHits |
|       | ANYDVLESQK                                       | +2                       | 583.79      | 1165.57       | 1165.56                    | 0.01                           | 64 | 4        |         |
|       | ADVDLYQVR                                        | +2                       | 539.78      | 1077.55       | 1077.55                    | 0                              | 68 | 3        |         |
| No.   | Protein                                          | Matched (SEQUEST MASCOT) | emPAI       | Strategy.Hits | PepMatched(SEQUEST MASCOT) | SpectraMatched(SEQUEST MASCOT) |    |          |         |
| 152.  | IPI00189358                                      | Y                        | Y           | 0.46          | 1                          | 2                              | 2  | 4        | 4       |
| *Des: | Transcription factor Pur-beta                    |                          |             |               |                            |                                |    |          |         |
|       | SEQUEST:(PepMatched Observed.Hits Coverage)      | 2                        | 1           | 14.86%        |                            |                                |    |          |         |
|       | Seq Charge Xcor Delta                            |                          | Probability | PepHits       |                            |                                |    |          |         |
|       | GGGGGGPGSFQPAPR                                  | +2                       | 2.504       | 0.361         | 0.9895                     | 3                              |    |          |         |
|       | GGGGFGGGPGGGLQSGQTIALPAQGLIEFR                   | +3                       | 4.632       | 0.432         | 0.9999                     | 3                              |    |          |         |
|       | MASCOT:(PepMatched Observed.Hits Coverage)       | 2                        | 1           | 14.86%        |                            |                                |    |          |         |
|       | Seq Charge ObservedMS                            |                          | ExpectedMS  | CalculatedMS  |                            |                                |    | PepScore | PepHits |
|       | GGGGGGPGSFQPAPR                                  | +2                       | 649.82      | 1297.63       | 1297.62                    | 0.01                           | 80 | 3        |         |
|       | GGGGFGGGPGGGLQSGQTIALPAQGLIEFR                   | +3                       | 951.84      | 2852.49       | 2852.46                    | 0.03                           | 57 | 3        |         |
| No.   | Protein                                          | Matched (SEQUEST MASCOT) | emPAI       | Strategy.Hits | PepMatched(SEQUEST MASCOT) | SpectraMatched(SEQUEST MASCOT) |    |          |         |

| Identified Human Platelet Proteins |                                                     |                          |            |               |                            |                                |        |          |         |  |
|------------------------------------|-----------------------------------------------------|--------------------------|------------|---------------|----------------------------|--------------------------------|--------|----------|---------|--|
| 153.                               | IPI00196648                                         | Y                        | Y          | 0.58          | 1                          | 2                              | 2      | 2        | 4       |  |
| *Des:                              | Syntaxin-7                                          |                          |            |               |                            |                                |        |          |         |  |
|                                    | SEQUEST:(PepMatched Observed.Hits Coverage)         |                          |            |               | 2                          | 1                              | 11.69% |          |         |  |
|                                    | Seq                                                 | Charge                   | Xcor       | Delta         | Proability                 | PepHits                        |        |          |         |  |
|                                    | TLNQLGTPQDTPELR                                     |                          |            | +2            | 3.740                      | 0.324                          | 0.9980 | 1        |         |  |
|                                    | LVAEFTTALTNFQK                                      | +2                       | 4.252      | 0.554         | 1.0000                     | 1                              |        |          |         |  |
|                                    | MASCOT:(PepMatched Observed.Hits Coverage)          |                          |            |               | 2                          | 1                              | 11.69% |          |         |  |
|                                    | Seq                                                 | Charge                   | ObservedMS | ExpectedMS    | CalculatedMS               |                                |        | Pepscore | PepHits |  |
|                                    | TLNQLGTPQDTPELR                                     | +2                       | 841.94     | 1681.87       | 1681.86                    | 0.01                           | 50     | 2        |         |  |
|                                    | LVAEFTTALTNFQK                                      | +2                       | 791.93     | 1581.85       | 1581.84                    | 0.01                           | 71     | 2        |         |  |
| No.                                | Protein                                             | Matched (SEQUEST MASCOT) | emPAI      | Strategy.Hits | PepMatched(SEQUEST MASCOT) | SpectraMatched(SEQUEST MASCOT) |        |          |         |  |
| 154.                               | IPI00212523                                         | Y                        | Y          | 0.63          | 2                          | 4                              | 2      | 6        | 4       |  |
| *Des:                              | DJ-1 protein                                        |                          |            |               |                            |                                |        |          |         |  |
|                                    | SEQUEST:(PepMatched Observed.Hits Coverage)         |                          |            |               | 4                          | 3                              | 31.08% |          |         |  |
|                                    | Seq                                                 | Charge                   | Xcor       | Delta         | Proability                 | PepHits                        |        |          |         |  |
|                                    | GAEEMETVIPVDIMR                                     | +2                       | 3.675      | 0.480         | 0.9997                     | 1                              |        |          |         |  |
|                                    | GPGTSFEFALAIVEALSGKDMANQVK                          | +3                       | 4.786      | 0.623         | 1.0000                     | 1                              |        |          |         |  |
|                                    | GPGTSFEFALAIVEALSGK                                 | +2                       | 5.442      | 0.692         | 1.0000                     | 3                              |        |          |         |  |
|                                    | VTVAGLAGKDPVQCSR                                    | +3                       | 3.417      | 0.413         | 0.9954                     | 3                              |        |          |         |  |
|                                    | MASCOT:(PepMatched Observed.Hits Coverage)          |                          |            |               | 2                          | 1                              | 13.98% |          |         |  |
|                                    | Seq                                                 | Charge                   | ObservedMS | ExpectedMS    | CalculatedMS               |                                |        | Pepscore | PepHits |  |
|                                    | GPGTSFEFALAIVEALSGK                                 | +2                       | 947.5086   | 1893.0027     | 1892.9883                  | 0.01                           | 130    | 2        |         |  |
|                                    | GPGTSFEFALAIVEALSGKDMANQVK                          | +3                       | 894.1235   | 2679.3486     | 2679.3577                  | 0                              | 61     | 2        |         |  |
| No.                                | Protein                                             | Matched (SEQUEST MASCOT) | emPAI      | Strategy.Hits | PepMatched(SEQUEST MASCOT) | SpectraMatched(SEQUEST MASCOT) |        |          |         |  |
| 155.                               | IPI00210920                                         | Y                        | Y          | 0.43          | 2                          | 5                              | 6      | 9        | 34      |  |
| *Des:                              | Aspartate aminotransferase, mitochondrial precursor |                          |            |               |                            |                                |        |          |         |  |
|                                    | SEQUEST:(PepMatched Observed.Hits Coverage)         |                          |            |               | 5                          | 1                              | 15.52% |          |         |  |
|                                    | Seq                                                 | Charge                   | Xcor       | Delta         | Proability                 | PepHits                        |        |          |         |  |
|                                    | DAGMQLQGYR                                          | +2                       | 3.404      | 0.473         | 0.9998                     | 4                              |        |          |         |  |
|                                    | PLYSNPPLNGAR                                        | +2                       | 3.127      | 0.372         | 0.9935                     | 7                              |        |          |         |  |
|                                    | ASAELALGENSEVLK                                     | +2                       | 3.719      | 0.418         | 0.9994                     | 1                              |        |          |         |  |
|                                    | FVTVQTISGTGALR                                      | +2                       | 4.016      | 0.479         | 0.9998                     | 2                              |        |          |         |  |
|                                    | IAATILTSPDLR                                        | +2                       | 3.390      | 0.448         | 0.9996                     | 1                              |        |          |         |  |
|                                    | MASCOT:(PepMatched Observed.Hits Coverage)          |                          |            |               | 6                          | 2                              | 16.89% |          |         |  |
|                                    | Seq                                                 | Charge                   | ObservedMS | ExpectedMS    | CalculatedMS               |                                |        | Pepscore | PepHits |  |
|                                    | DAGMQLQGYR                                          | +2                       | 569.77     | 1137.53       | 1137.52                    | 0.01                           | 55     | 25       |         |  |
|                                    | MNLGVGAYR                                           | +2                       | 490.76     | 979.50        | 979.49                     | 0.01                           | 44     | 1        |         |  |
|                                    | VGASFLQR                                            | +2                       | 439.74     | 877.46        | 876.48                     | 0.98                           | 59     | 20       |         |  |
|                                    | IAATILTSPDLR                                        | +2                       | 635.88     | 1269.74       | 1269.73                    | 0.01                           | 63     | 1        |         |  |
|                                    | FVTVQTISGTGALR                                      | +2                       | 725.41     | 1448.81       | 1448.80                    | 0.01                           | 90     | 2        |         |  |
|                                    | ASAELALGENSEVLK                                     | +2                       | 765.91     | 1529.81       | 1529.79                    | 0.02                           | 57     | 1        |         |  |
| No.                                | Protein                                             | Matched (SEQUEST MASCOT) | emPAI      | Strategy.Hits | PepMatched(SEQUEST MASCOT) | SpectraMatched(SEQUEST MASCOT) |        |          |         |  |
| 156.                               | IPI00565930                                         | N                        | Y          | 0.02          | 1                          | 0                              | 5      | 0        | 61      |  |
| *Des:                              | 52 kDa protein                                      |                          |            |               |                            |                                |        |          |         |  |

Identified Human Platelet Proteins

| No.   | Protein                                                                                                                                                    | Matched (SEQUEST MASCOT) | emPAI      | Strategy.Hits | PepMatched(SEQUEST MASCOT) | SpectraMatched(SEQUEST MASCOT) |    |   |                  |
|-------|------------------------------------------------------------------------------------------------------------------------------------------------------------|--------------------------|------------|---------------|----------------------------|--------------------------------|----|---|------------------|
| 157.  | IPI00370456                                                                                                                                                | Y                        | Y          | 0.17          | 2                          | 4                              | 3  | 9 | 8                |
| *Des: | PREDICTED: similar to Proteasome 26S non-ATPase subunit 2                                                                                                  |                          |            |               |                            |                                |    |   |                  |
|       | SEQUEST:(PepMatched Observed.Hits Coverage)                                                                                                                |                          | 4          | 2             | 10.6%                      |                                |    |   |                  |
|       | Seq                                                                                                                                                        | Charge                   | Xcor       | Delta         | Probility                  | PepHits                        |    |   |                  |
|       | MNLASSFVNGFVNAAFGQDK                                                                                                                                       | +3                       | 4.974      | 0.537         | 1.0000                     | 2                              |    |   |                  |
|       | AELATEEFLPVTPILEGFVILR                                                                                                                                     | +3                       | 5.460      | 0.608         | 1.0000                     | 3                              |    |   |                  |
|       | EAPADMGAHQGVAVLGIAMGEEIGAEMALR                                                                                                                             | +3                       | 5.001      | 0.612         | 1.0000                     | 2                              |    |   |                  |
|       | GEAIEAILAALEVSEPFRR                                                                                                                                        | +3                       | 4.993      | 0.575         | 1.0000                     | 2                              |    |   |                  |
|       | MASCOT:(PepMatched Observed.Hits Coverage)                                                                                                                 |                          | 3          | 2             | 6.92%                      |                                |    |   |                  |
|       | Seq                                                                                                                                                        | Charge                   | ObservedMS | ExpectedMS    | CalculatedMS               |                                |    |   | PepScore PepHits |
|       | MNLASSFVNGFVNAAFGQDK                                                                                                                                       | +3                       | 706.35     | 2116.02       | 2116.00                    | 0.02                           | 72 |   | 1                |
|       | AELATEEFLPVTPILEGFVILR                                                                                                                                     | +3                       | 819.80     | 2456.38       | 2456.36                    | 0.02                           | 54 |   | 2                |
|       | GEAIEAILAALEVSEPFRR                                                                                                                                        | +3                       | 672.04     | 2013.09       | 2013.08                    | 0.01                           | 81 |   | 1                |
| 158.  | IPI00213329                                                                                                                                                | Y                        | N          | 0.38          | 1                          | 3                              | 0  | 3 | 0                |
| *Des: | PREDICTED: similar to methylenetetrahydrofolate dehydrogenase (NAD) (EC 1.5.1.15) / methenyltetrahydrofolate cyclohydrolase (EC 3.5.4.9) precursor - mouse |                          |            |               |                            |                                |    |   |                  |
|       | SEQUEST:(PepMatched Observed.Hits Coverage)                                                                                                                |                          | 3          | 1             | 10.42%                     |                                |    |   |                  |
|       | Seq                                                                                                                                                        | Charge                   | Xcor       | Delta         | Probility                  | PepHits                        |    |   |                  |
|       | EGATVIDVGINR                                                                                                                                               | +2                       | 3.132      | 0.409         | 0.9990                     | 2                              |    |   |                  |
|       | LVGDVDFEGVK                                                                                                                                                | +2                       | 2.817      | 0.340         | 0.9958                     | 2                              |    |   |                  |
|       | VLRPEEVLK                                                                                                                                                  | +3                       | 3.201      | 0.392         | 0.9996                     | 1                              |    |   |                  |
|       | MASCOT:(PepMatched Observed.Hits Coverage)                                                                                                                 |                          |            |               |                            |                                |    |   |                  |
| 159.  | IPI00205166                                                                                                                                                | Y                        | Y          | 0.06          | 3                          | 2                              | 3  | 7 | 14               |
| *Des: | Integrin alpha 6 subchain                                                                                                                                  |                          |            |               |                            |                                |    |   |                  |
|       | SEQUEST:(PepMatched Observed.Hits Coverage)                                                                                                                |                          | 2          | 2             | 3.48%                      |                                |    |   |                  |
|       | Seq                                                                                                                                                        | Charge                   | Xcor       | Delta         | Probility                  | PepHits                        |    |   |                  |
|       | NSYPDVAVGSLSDSVTIFR                                                                                                                                        | +2                       | 3.604      | 0.258         | 0.9653                     | 1                              |    |   |                  |
|       | VNSLPEVLPILNSNEAK                                                                                                                                          | +2                       | 3.983      | 0.529         | 0.9998                     | 2                              |    |   |                  |
|       | MASCOT:(PepMatched Observed.Hits Coverage)                                                                                                                 |                          | 3          | 2             | 3.84%                      |                                |    |   |                  |
|       | Seq                                                                                                                                                        | Charge                   | ObservedMS | ExpectedMS    | CalculatedMS               |                                |    |   | PepScore PepHits |
|       | WSNVKPVR                                                                                                                                                   | +2                       | 493.2852   | 984.5558      | 984.5505                   | 0.01                           | 41 |   | 2                |
|       | SRPVINILK                                                                                                                                                  | +2                       | 520.3377   | 1038.6609     | 1038.6549                  | 0.01                           | 46 |   | 2                |
|       | ASIDVTAAQNIKLPHAGTQVR                                                                                                                                      | +3                       | 754.4280   | 2260.2621     | 2260.2287                  | 0.03                           | 49 |   | 2                |

Identified Human Platelet Proteins

|       |                                             |                          |            |               |                            |                                |          |         |  |
|-------|---------------------------------------------|--------------------------|------------|---------------|----------------------------|--------------------------------|----------|---------|--|
| No.   | Protein                                     | Matched (SEQUEST MASCOT) | emPAI      | Strategy.Hits | PepMatched(SEQUEST MASCOT) | SpectraMatched(SEQUEST MASCOT) |          |         |  |
| 160.  | IPI00204365                                 | Y Y                      | 0.02       | 2             | 2                          | 2                              | 4        | 4       |  |
| *Des: | Ribophorin I                                |                          |            |               |                            |                                |          |         |  |
|       | SEQUEST:(PepMatched Observed.Hits Coverage) |                          |            |               | 2                          | 3                              | 4.05%    |         |  |
|       | Seq                                         | Charge                   | Xcor       | Delta         | Proability                 | PepHits                        |          |         |  |
|       | GEDEEDNNLEVR                                | +2                       | 3.109      | 0.427         | 0.9994                     |                                | 2        |         |  |
|       | SEDILDYGPFK                                 | +2                       | 3.731      | 0.380         | 0.9997                     |                                | 2        |         |  |
|       | MASCOT:(PepMatched Observed.Hits Coverage)  |                          |            |               | 2                          | 3                              | 5.18%    |         |  |
|       | Seq                                         | Charge                   | ObservedMS | ExpectedMS    | CalculatedMS               |                                | Pepscore | PepHits |  |
|       | FVDHVFDEQVIDSLTVK                           | +2                       | 996.0189   | 1990.0232     | 1990.0047                  | 0.02                           | 98       | 3       |  |
|       | DTYIENEKLSSGK                               | +2                       | 742.3766   | 1482.7387     | 1482.7202                  | 0.02                           | 60       | 1       |  |
| No.   | Protein                                     | Matched (SEQUEST MASCOT) | emPAI      | Strategy.Hits | PepMatched(SEQUEST MASCOT) | SpectraMatched(SEQUEST MASCOT) |          |         |  |
| 161.  | IPI00360767                                 | Y N                      | 0.07       | 1             | 2                          | 0                              | 2        | 0       |  |
| *Des: | PREDICTED: similar to beta1-syntrophin      |                          |            |               |                            |                                |          |         |  |
|       | SEQUEST:(PepMatched Observed.Hits Coverage) |                          |            |               | 2                          | 1                              | 5.08%    |         |  |
|       | Seq                                         | Charge                   | Xcor       | Delta         | Proability                 | PepHits                        |          |         |  |
|       | SMTLADPENR                                  | +2                       | 2.906      | 0.359         | 0.9930                     |                                | 1        |         |  |
|       | GSGTGHPGTGVPQAPDSPAGVR                      | +3                       | 3.196      | 0.452         | 0.9997                     |                                | 1        |         |  |
|       | MASCOT:(PepMatched Observed.Hits Coverage)  |                          |            |               |                            |                                |          |         |  |
| No.   | Protein                                     | Matched (SEQUEST MASCOT) | emPAI      | Strategy.Hits | PepMatched(SEQUEST MASCOT) | SpectraMatched(SEQUEST MASCOT) |          |         |  |
| 162.  | IPI00476855                                 | N Y                      | 0.07       | 1             | 0                          | 2                              | 0        | 3       |  |
| *Des: | LRRGT00050                                  |                          |            |               |                            |                                |          |         |  |
|       | SEQUEST:(PepMatched Observed.Hits Coverage) |                          |            |               |                            |                                |          |         |  |
|       | MASCOT:(PepMatched Observed.Hits Coverage)  |                          |            |               | 2                          | 1                              | 1.91%    |         |  |
|       | Seq                                         | Charge                   | ObservedMS | ExpectedMS    | CalculatedMS               |                                | Pepscore | PepHits |  |
|       | DQVDSAVQELLQLK                              | +2                       | 793.43     | 1584.84       | 1584.84                    | 0                              | 108      | 1       |  |
|       | GVLEDIQLNLFTR                               | +2                       | 759.43     | 1516.84       | 1516.82                    | 0.02                           | 50       | 2       |  |
| No.   | Protein                                     | Matched (SEQUEST MASCOT) | emPAI      | Strategy.Hits | PepMatched(SEQUEST MASCOT) | SpectraMatched(SEQUEST MASCOT) |          |         |  |
| 163.  | IPI00387771                                 | Y Y                      | 3.95       | 4             | 9                          | 6                              | 35       | 38      |  |
| *Des: | Peptidyl-prolyl cis-trans isomerase A       |                          |            |               |                            |                                |          |         |  |
|       | SEQUEST:(PepMatched Observed.Hits Coverage) |                          |            |               | 9                          | 10                             | 72.89%   |         |  |
|       | Seq                                         | Charge                   | Xcor       | Delta         | Proability                 | PepHits                        |          |         |  |
|       | KITISDCGQ                                   | +2                       | 2.925      | 0.490         | 0.9953                     |                                | 1        |         |  |
|       | VNPTVFFDITADGEPLGR                          | +2                       | 5.418      | 0.628         | 1.0000                     |                                | 14       |         |  |
|       | KITISDCGQL                                  | +2                       | 2.846      | 0.420         | 0.9987                     |                                | 2        |         |  |
|       | VKEGMSIVEAMER                               | +3                       | 3.127      | 0.310         | 0.9983                     |                                | 3        |         |  |
|       | SIYGEKFEDENFILK                             | +2                       | 4.604      | 0.464         | 1.0000                     |                                | 2        |         |  |
|       | TEWLDGKHVVFGK                               | +2                       | 4.190      | 0.499         | 1.0000                     |                                | 4        |         |  |
|       | IIPGFMCQGGDFTR                              | +2                       | 4.036      | 0.655         | 1.0000                     |                                | 5        |         |  |
|       | VCFELFADKVPK                                | +2                       | 2.751      | 0.500         | 0.9966                     |                                | 2        |         |  |
|       | ALSTGEKGFYKGSFHR                            | +2                       | 4.819      | 0.529         | 1.0000                     |                                | 9        |         |  |
|       | MASCOT:(PepMatched Observed.Hits Coverage)  |                          |            |               | 6                          | 9                              | 46.38%   |         |  |
|       | Seq                                         | Charge                   | ObservedMS | ExpectedMS    | CalculatedMS               |                                | Pepscore | PepHits |  |

Identified Human Platelet Proteins

|                    |    |          |           |           |      |     |    |
|--------------------|----|----------|-----------|-----------|------|-----|----|
| VKEGMSIVEAMER      | +2 | 739.8755 | 1477.7365 | 1477.7268 | 0.01 | 50  | 8  |
| SIYGEKFEDENFILK    | +2 | 916.4663 | 1830.9181 | 1830.9039 | 0.01 | 76  | 4  |
| ALSTGEKGFYK        | +2 | 629.3298 | 1256.6450 | 1256.6400 | 0    | 48  | 6  |
| VCFELFADKVPK       | +2 | 698.3768 | 1394.7391 | 1394.7267 | 0.01 | 54  | 1  |
| IIPGFMCQGGDFTR     | +2 | 771.3717 | 1540.7289 | 1540.7166 | 0.01 | 79  | 5  |
| ALSTGEKGFYKGGSSFHR | +2 | 964.9895 | 1927.9645 | 1927.9540 | 0.01 | 105 | 18 |

|       |                                                                |                          |          |               |                            |                                |
|-------|----------------------------------------------------------------|--------------------------|----------|---------------|----------------------------|--------------------------------|
| No.   | Protein                                                        | Matched (SEQUEST MASCOT) | emPAI    | Strategy.Hits | PepMatched(SEQUEST MASCOT) | SpectraMatched(SEQUEST MASCOT) |
| 164.  | IPI00422092                                                    | Y Y                      | 0.73     | 2             | 2 3 3                      | 4                              |
| *Des: | Ras-related C3 botulinum toxin substrate 1                     |                          |          |               |                            |                                |
|       | SEQUEST:(PepMatched Observed.Hits Coverage)                    |                          |          | 2             | 1                          | 8.16%                          |
|       | Seq Charge Xcor Delta Probility PepHits                        |                          |          |               |                            |                                |
|       | LTPITYPQGLAMAK +2                                              |                          | 2.792    | 0.415         | 0.9970                     | 4                              |
|       | KLTPITYPQGLAMAK +2                                             |                          | 3.021    | 0.426         | 0.9981                     | 3                              |
|       | MASCOT:(PepMatched Observed.Hits Coverage)                     |                          |          | 3             | 1                          | 14.28%                         |
|       | Seq Charge ObservedMS ExpectedMS CalculatedMS Pepscore PepHits |                          |          |               |                            |                                |
|       | GLKTVFDEAIR +2                                                 |                          | 624.8932 | 1247.7718     | 1247.6873                  | 0.08 35 1                      |
|       | LTPITYPQGLAMAK +2                                              |                          | 752.4788 | 1502.9430     | 1502.8167                  | 0.13 34 1                      |
|       | KLTPITYPQGLAMAK +2                                             |                          | 816.5255 | 1631.0364     | 1630.9116                  | 0.12 56 2                      |

|       |                                                                |                          |        |               |                            |                                |
|-------|----------------------------------------------------------------|--------------------------|--------|---------------|----------------------------|--------------------------------|
| No.   | Protein                                                        | Matched (SEQUEST MASCOT) | emPAI  | Strategy.Hits | PepMatched(SEQUEST MASCOT) | SpectraMatched(SEQUEST MASCOT) |
| 165.  | IPI00325135                                                    | Y Y                      | 1.34   | 3             | 11 13 37                   | 446                            |
| *Des: | 14-3-3 protein epsilon                                         |                          |        |               |                            |                                |
|       | SEQUEST:(PepMatched Observed.Hits Coverage)                    |                          |        | 11            | 5                          | 58.07%                         |
|       | Seq Charge Xcor Delta Probility PepHits                        |                          |        |               |                            |                                |
|       | YDEMVESMK +2                                                   |                          | 3.171  | 0.182         | 0.9769                     | 8                              |
|       | YLAEFATGNDRK +2                                                |                          | 2.914  | 0.315         | 0.9893                     | 4                              |
|       | YLAEFATGNDR +2                                                 |                          | 3.302  | 0.382         | 0.9983                     | 4                              |
|       | AASDIAMTELPPTHPIR +2                                           |                          | 4.980  | 0.512         | 1.0000                     | 9                              |
|       | KVAGMDVELTVEER+2                                               |                          | 4.184  | 0.533         | 1.0000                     | 1                              |
|       | DNLTWTSMDQGDGEEQNK +2                                          |                          | 5.533  | 0.623         | 1.0000                     | 2                              |
|       | AAFDDAIAELDTLSEESYK +2                                         |                          | 6.261  | 0.588         | 1.0000                     | 3                              |
|       | LGLALNFSVFYIEILNSPDR +2                                        |                          | 5.882  | 0.565         | 1.0000                     | 8                              |
|       | AAFDDAIAELDTLSEESYKDSTLIMQLLR +3                               |                          | 6.941  | 0.674         | 1.0000                     | 3                              |
|       | EALQDVEDEN +2                                                  |                          | 2.861  | 0.384         | 0.9861                     | 3                              |
|       | KEAAENSLVAYK +2                                                |                          | 3.197  | 0.339         | 0.9956                     | 3                              |
|       | MASCOT:(PepMatched Observed.Hits Coverage)                     |                          |        | 13            | 7                          | 58.07%                         |
|       | Seq Charge ObservedMS ExpectedMS CalculatedMS Pepscore PepHits |                          |        |               |                            |                                |
|       | QMVETELK +2                                                    |                          | 489.26 | 976.50        | 976.49                     | 0.01 63 2                      |
|       | EALQDVEDENQ +2                                                 |                          | 645.28 | 1288.55       | 1288.54                    | 0.01 68 5                      |
|       | KEAAENSLVAYK +2                                                |                          | 661.86 | 1321.70       | 1321.69                    | 0.01 77 4                      |
|       | YDEMVESMK +2                                                   |                          | 566.24 | 1130.47       | 1130.46                    | 0.01 56 5                      |
|       | YLAEFATGNDRK +2                                                |                          | 692.85 | 1383.69       | 1383.68                    | 0.01 50 8                      |
|       | YLAEFATGNDR +2                                                 |                          | 628.80 | 1255.59       | 1255.58                    | 0.01 75 7                      |
|       | VAGMDVELTVEER +2                                               |                          | 724.36 | 1446.71       | 1446.70                    | 0.01 102 10                    |
|       | KVAGMDVELTVEER+2                                               |                          | 789.37 | 1576.73       | 1574.80                    | 1.93 54 3                      |
|       | AASDIAMTELPPTHPIR +2                                           |                          | 910.48 | 1818.95       | 1818.93                    | 0.02 92 14                     |



Identified Human Platelet Proteins

|                      |    |        |         |         |         |      |     |   |
|----------------------|----|--------|---------|---------|---------|------|-----|---|
| NLLSVAYK             | +2 | 453.37 | 904.73  | 906.52  | -1.78   | 53   | 350 |   |
| AAFDDAIAELDTLSEESYK  | +3 | 696.66 | 2086.66 | 2086.97 | 2086.96 | 0.01 | 66  | 3 |
| DSTLIMQLLR           | +2 | 594.70 | 1187.40 | 1188.65 | -1.24   | 78   | 245 |   |
| LGLALNFSVFYYEILNSPDR | +3 | 777.74 | 2330.21 | 2330.19 | 0.02    | 45   | 45  | 2 |

No. 166. Protein IPI00557778 Matched (SEQUEST MASCOT) N Y emPAI Strategy.Hits 1.05 1 0 5 0 22 PepMatched (SEQUEST MASCOT) SpectraMatched (SEQUEST MASCOT)

\*Des: 59 kDa protein

SEQUEST:(PepMatched Observed.Hits Coverage)

MASCOT:(PepMatched Observed.Hits Coverage)

| Seq              | Charge | ObservedMS | ExpectedMS | CalculatedMS | PepScore | PepHits |
|------------------|--------|------------|------------|--------------|----------|---------|
| TSELNLDQFHDK     | +2     | 723.85     | 1445.69    | 1445.68      | 0.01     | 58      |
| VVDDWANDGWGLK    | +2     | 737.85     | 1473.69    | 1473.69      | 0        | 76      |
| APVPTGEVYFADSFDR | +2     | 885.92     | 1769.83    | 1769.83      | 0        | 81      |
| IPNPDFEFLEPFR    | +2     | 868.43     | 1734.84    | 1734.83      | 0.01     | 63      |
| KIPNPDFEFLEPFR   | +3     | 621.98     | 1862.93    | 1862.92      | 0.01     | 44      |

No. 167. Protein IPI00326948 Matched (SEQUEST MASCOT) Y Y emPAI Strategy.Hits 0.24 3 4 3 6 8 PepMatched (SEQUEST MASCOT) SpectraMatched (SEQUEST MASCOT)

\*Des: Hsd17b4 protein

SEQUEST:(PepMatched Observed.Hits Coverage)

MASCOT:(PepMatched Observed.Hits Coverage)

| Seq             | Charge | Xcor  | Delta | Probability | PepHits |
|-----------------|--------|-------|-------|-------------|---------|
| VVLVTGAGGGLGR   | +2     | 3.826 | 0.452 | 0.9996      | 2       |
| AYALAFER        | +2     | 3.107 | 0.414 | 0.9990      | 2       |
| SIQESTGGIIEVLHK | +2     | 3.748 | 0.488 | 0.9996      | 1       |
| LGLLGLANTLVIEGR | +2     | 4.296 | 0.610 | 1.0000      | 2       |

  

| Seq             | Charge | ObservedMS | ExpectedMS | CalculatedMS | PepScore | PepHits |
|-----------------|--------|------------|------------|--------------|----------|---------|
| VVLVTGAGGGLGR   | +2     | 578.35     | 1154.68    | 1154.68      | 0        | 70      |
| SIQESTGGIIEVLHK | +2     | 805.94     | 1609.87    | 1609.87      | 0        | 88      |
| LGLLGLANTLVIEGR | +2     | 769.97     | 1537.93    | 1537.92      | 0.01     | 94      |

No. 168. Protein IPI00201969 Matched (SEQUEST MASCOT) Y Y emPAI Strategy.Hits 0.4 1 6 4 7 4 PepMatched (SEQUEST MASCOT) SpectraMatched (SEQUEST MASCOT)

\*Des: PREDICTED: similar to Vesicle amine transport protein 1 homolog (T californica)

SEQUEST:(PepMatched Observed.Hits Coverage)

MASCOT:(PepMatched Observed.Hits Coverage)

| Seq                   | Charge | Xcor  | Delta | Probability | PepHits |
|-----------------------|--------|-------|-------|-------------|---------|
| EATEAATVAAAAEAR       | +2     | 3.796 | 0.380 | 0.9993      | 1       |
| ENGVTHPIDYHTTDYVDEIKK | +3     | 3.557 | 0.351 | 0.9983      | 2       |
| TVENVTVFGTASASK       | +2     | 3.173 | 0.510 | 0.9997      | 1       |
| GVDIVMDPLGGSDTAK      | +2     | 3.443 | 0.548 | 0.9999      | 1       |
| VVTYGMANLLTGPK        | +2     | 2.771 | 0.256 | 0.9696      | 2       |
| TWWNQFSVTALQLLQANR    | +2     | 5.277 | 0.487 | 1.0000      | 2       |

  

| Seq             | Charge | ObservedMS | ExpectedMS | CalculatedMS | PepScore | PepHits |
|-----------------|--------|------------|------------|--------------|----------|---------|
| EATEAATVAAAAEAR | +2     | 716.36     | 1430.71    | 1430.70      | 0.01     | 59      |
| TVENVTVFGTASASK | +2     | 755.89     | 1509.77    | 1509.77      | 0        | 53      |

Identified Human Platelet Proteins

|                    |    |        |         |         |      |    |   |
|--------------------|----|--------|---------|---------|------|----|---|
| GVDIVMDPLGGSDTAK   | +2 | 787.89 | 1573.77 | 1573.77 | 0    | 42 | 1 |
| TWWNQFSVTALQLLQANR | +3 | 726.05 | 2175.13 | 2175.12 | 0.01 | 55 | 1 |

No. 169. Protein IPI00464557 Matched (SEQUEST MASCOT) N Y emPAI Strategy.Hits 0.22 1 0 2 0 10 PepMatched(SEQUEST MASCOT) SpectraMatched(SEQUEST MASCOT)

\*Des: Splice Isoform 3 of Drebrin-like protein

SEQUEST:(PepMatched Observed.Hits Coverage)

|                                            |        |            |            |              |      |          |         |
|--------------------------------------------|--------|------------|------------|--------------|------|----------|---------|
| MASCOT:(PepMatched Observed.Hits Coverage) | 2      | 1          | 6.59%      |              |      |          |         |
| Seq                                        | Charge | ObservedMS | ExpectedMS | CalculatedMS |      | PepScore | PepHits |
| TGELEQEVVSR                                | +2     | 623.8213   | 1245.6280  | 1245.6200    | 0.01 | 57       | 4       |
| SRQEWESAGQQAPHR                            | +3     | 621.9721   | 1862.8945  | 1862.8772    | 0.02 | 56       | 6       |

No. 170. Protein IPI00187902 Matched (SEQUEST MASCOT) Y Y emPAI Strategy.Hits 1.73 1 3 3 5 3 PepMatched(SEQUEST MASCOT) SpectraMatched(SEQUEST MASCOT)

\*Des: CD9 antigen

SEQUEST:(PepMatched Observed.Hits Coverage)

|                                             |        |            |            |              |         |          |         |
|---------------------------------------------|--------|------------|------------|--------------|---------|----------|---------|
| SEQUEST:(PepMatched Observed.Hits Coverage) | 3      | 2          | 22.27%     |              |         |          |         |
| Seq                                         | Charge | Xcor       | Delta      | Probility    | PepHits |          |         |
| ELQEFYKDTYQK                                | +2     | 2.771      | 0.393      | 0.9979       | 1       |          |         |
| AIHMALNCCGIAGGVEQFISDICPK                   | +3     | 3.645      | 0.434      | 0.9988       | 1       |          |         |
| NKDEPQRETLK                                 | +2     | 3.108      | 0.264      | 0.9934       | 16      |          |         |
| MASCOT:(PepMatched Observed.Hits Coverage)  | 3      | 1          | 21.39%     |              |         |          |         |
| Seq                                         | Charge | ObservedMS | ExpectedMS | CalculatedMS |         | PepScore | PepHits |
| NKDEPQRETLK                                 | +2     | 679.3611   | 1356.7077  | 1356.6997    | 0.01    | 44       | 1       |
| KVLESFQVK                                   | +2     | 603.3522   | 1204.6899  | 1204.6815    | 0.01    | 57       | 3       |
| AIHMALNCCGIAGGVEQFISDICPK                   | +3     | 863.4169   | 2587.2290  | 2589.2211    | -1.98   | 44       | 1       |

No. 171. Protein IPI00287338 Matched (SEQUEST MASCOT) Y N emPAI Strategy.Hits 0.08 1 4 0 4 0 PepMatched(SEQUEST MASCOT) SpectraMatched(SEQUEST MASCOT)

\*Des: Nuclear export factor CRM1

SEQUEST:(PepMatched Observed.Hits Coverage)

|                                             |        |       |       |           |         |  |  |
|---------------------------------------------|--------|-------|-------|-----------|---------|--|--|
| SEQUEST:(PepMatched Observed.Hits Coverage) | 4      | 1     | 5.31% |           |         |  |  |
| Seq                                         | Charge | Xcor  | Delta | Probility | PepHits |  |  |
| LNMILVQILK                                  | +2     | 2.798 | 0.346 | 0.9968    | 1       |  |  |
| YYGLQILENVIK                                | +2     | 3.516 | 0.477 | 0.9998    | 1       |  |  |
| YMLLPNQVWDSIIQQATK                          | +3     | 4.512 | 0.444 | 1.0000    | 1       |  |  |
| FLNWIPLG YIFETK                             | +2     | 3.008 | 0.364 | 0.9969    | 1       |  |  |
| MASCOT:(PepMatched Observed.Hits Coverage)  |        |       |       |           |         |  |  |

No. 172. Protein IPI00198327 Matched (SEQUEST MASCOT) Y Y emPAI Strategy.Hits 0.5 2 3 3 3 5 PepMatched(SEQUEST MASCOT) SpectraMatched(SEQUEST MASCOT)

\*Des: Voltage-dependent anion-selective channel protein 2

SEQUEST:(PepMatched Observed.Hits Coverage)

|                                             |        |            |            |              |         |          |         |
|---------------------------------------------|--------|------------|------------|--------------|---------|----------|---------|
| SEQUEST:(PepMatched Observed.Hits Coverage) | 3      | 1          | 17%        |              |         |          |         |
| Seq                                         | Charge | Xcor       | Delta      | Probility    | PepHits |          |         |
| YQLDPTASISAK                                | +2     | 3.123      | 0.301      | 0.9912       | 5       |          |         |
| TGDFQLHTNVNNGTEFGGSIYQK                     | +3     | 5.918      | 0.531      | 1.0000       | 1       |          |         |
| LTFDITTFSPNTGK                              | +2     | 3.695      | 0.581      | 1.0000       | 1       |          |         |
| MASCOT:(PepMatched Observed.Hits Coverage)  | 3      | 2          | 17%        |              |         |          |         |
| Seq                                         | Charge | ObservedMS | ExpectedMS | CalculatedMS |         | PepScore | PepHits |

Identified Human Platelet Proteins

|                         |    |        |         |         |         |    |      |
|-------------------------|----|--------|---------|---------|---------|----|------|
| YQLDPTASISAK            | +2 | 647.34 | 1292.66 | 1292.66 | 0       | 51 | 15   |
| LTFDFFFSPNTGK           | +2 | 714.86 | 1427.70 | 1427.69 | 0.01    | 94 | 1    |
| TGDFQLHTNVNNGTEFGGSIYQK | +3 |        | 843.07  | 2526.18 | 2526.18 | 0  | 59 1 |

No. 173. Protein IPI00195851 Matched (SEQUEST MASCOT) Y N emPAI 0.33 Strategy.Hits 2 PepMatched(SEQUEST MASCOT) 7 SpectraMatched(SEQUEST MASCOT) 0

\*Des: Hypothetical LOC299052

|                                             |        |      |       |           |
|---------------------------------------------|--------|------|-------|-----------|
| SEQUEST:(PepMatched Observed.Hits Coverage) |        | 7    | 4     | 25.87%    |
| Seq                                         | Charge | Xcor | Delta | Probility |
| GILAADESTGSIKR                              | +2     |      | 4.359 | 0.540     |
| GILAADESTGSIK                               | +2     |      | 4.391 | 0.596     |
| AAQEEYIKR                                   | +2     |      | 2.917 | 0.421     |
| ALANSLACQGK                                 | +2     |      | 3.661 | 0.557     |
| YASICQQNGIVIVEPEILPDGDHDLKR                 | +3     |      | 6.195 | 0.525     |
| RLQSIGTENTEENRR                             | +3     |      | 3.788 | 0.351     |
| SKGGVVGIVDK                                 | +2     |      | 3.223 | 0.483     |

MASCOT:(PepMatched Observed.Hits Coverage)

No. 174. Protein IPI00365929 Matched (SEQUEST MASCOT) Y Y emPAI 0.88 Strategy.Hits 4 PepMatched(SEQUEST MASCOT) 8 SpectraMatched(SEQUEST MASCOT) 13

\*Des: Thioredoxin domain conTaining 7

|                                             |        |      |       |           |
|---------------------------------------------|--------|------|-------|-----------|
| SEQUEST:(PepMatched Observed.Hits Coverage) |        | 8    | 6     | 28.91%    |
| Seq                                         | Charge | Xcor | Delta | Probility |
| GSTAPVGGGSFPNITPR                           | +2     |      | 4.531 | 0.571     |
| HQSLGGQYGVQGFPTIK                           | +2     |      | 4.848 | 0.669     |
| DVVELTDDTFDK                                | +2     |      | 2.949 | 0.524     |
| LAAVDATVNQVLASR                             | +2     |      | 4.128 | 0.402     |
| GSFSEQGINEFLR                               | +2     |      | 3.578 | 0.491     |
| TGEAIVDAALSALR                              | +2     |      | 4.007 | 0.426     |
| ALDLFSDNAPPELLEIINEDIAK                     | +2     |      | 4.448 | 0.547     |
| GESPVDYDGGR                                 | +2     |      | 2.838 | 0.451     |

MASCOT:(PepMatched Observed.Hits Coverage)

|                         |        |            |            |              |          |           |
|-------------------------|--------|------------|------------|--------------|----------|-----------|
| Seq                     | Charge | ObservedMS | ExpectedMS | CalculatedMS | Pepscore | PepHits   |
| GESPVDYDGGR             | +2     | 576.26     | 1150.50    | 1150.49      | 0.01     | 55 2      |
| GSTAPVGGGSFPNITPR       | +2     | 807.92     | 1613.82    | 1613.82      | 0        | 86 3      |
| HQSLGGQYGVQGFPTIK       | +2     | 908.97     | 1815.93    | 1815.93      | 0        | 77 3      |
| GSFSEQGINEFLR           | +2     | 742.37     | 1482.72    | 1482.71      | 0.01     | 44 1      |
| LAAVDATVNQVLASR         | +2     | 764.43     | 1526.85    | 1526.84      | 0.01     | 70 2      |
| TGEAIVDAALSALR          | +2     | 693.88     | 1385.75    | 1385.75      | 0        | 83 4      |
| ALDLFSDNAPPELLEIINEDIAK | +3     |            | 879.80     | 2636.37      | 2636.36  | 0.01 56 1 |

No. 175. Protein IPI00365783 Matched (SEQUEST MASCOT) N Y emPAI 0.05 Strategy.Hits 1 PepMatched(SEQUEST MASCOT) 0 SpectraMatched(SEQUEST MASCOT) 4

\*Des: PREDICTED: similar to isoleucine-tRNA synthetase

SEQUEST:(PepMatched Observed.Hits Coverage)

MASCOT:(PepMatched Observed.Hits Coverage) 2 1 1.41%

|     |        |            |            |              |          |         |
|-----|--------|------------|------------|--------------|----------|---------|
| Seq | Charge | ObservedMS | ExpectedMS | CalculatedMS | Pepscore | PepHits |
|-----|--------|------------|------------|--------------|----------|---------|

**Identified Human Platelet Proteins**

|            |    |        |         |         |   |    |   |
|------------|----|--------|---------|---------|---|----|---|
| LFILMEAR   | +2 | 496.78 | 991.55  | 991.55  | 0 | 51 | 3 |
| LYLINSPVVR | +2 | 587.85 | 1173.69 | 1172.69 | 1 | 43 | 1 |

No. 176. Protein IPI00339040 Matched (SEQUEST MASCOT) Y Y emPAI Strategy.Hits 0.64 1 PepMatched(SEQUEST MASCOT) 2 2 SpectraMatched(SEQUEST MASCOT) 2 8

\*Des: Ubiquitin-conjugating enzyme E2 variant 2

SEQUEST:(PepMatched Observed.Hits Coverage) 2 1 14.96%

| Seq | Charge | Xcor | Delta | Proability | PepHits |
|-----|--------|------|-------|------------|---------|
|-----|--------|------|-------|------------|---------|

|           |    |       |       |        |   |
|-----------|----|-------|-------|--------|---|
| LLEEEEGQK | +2 | 2.834 | 0.537 | 0.9930 | 1 |
|-----------|----|-------|-------|--------|---|

|            |    |       |       |        |   |
|------------|----|-------|-------|--------|---|
| WTGMIIGPPR | +2 | 2.921 | 0.383 | 0.9728 | 1 |
|------------|----|-------|-------|--------|---|

MASCOT:(PepMatched Observed.Hits Coverage) 2 1 14.96%

| Seq | Charge | ObservedMS | ExpectedMS | CalculatedMS | Pepscore | PepHits |
|-----|--------|------------|------------|--------------|----------|---------|
|-----|--------|------------|------------|--------------|----------|---------|

|           |    |        |         |         |   |    |   |
|-----------|----|--------|---------|---------|---|----|---|
| LLEEEEGQK | +2 | 594.31 | 1186.61 | 1186.61 | 0 | 54 | 5 |
|-----------|----|--------|---------|---------|---|----|---|

|            |    |        |         |         |   |    |   |
|------------|----|--------|---------|---------|---|----|---|
| WTGMIIGPPR | +2 | 564.30 | 1126.59 | 1126.60 | 0 | 46 | 6 |
|------------|----|--------|---------|---------|---|----|---|

No. 177. Protein IPI00231046 Matched (SEQUEST MASCOT) Y Y emPAI Strategy.Hits 0.87 1 PepMatched(SEQUEST MASCOT) 3 3 SpectraMatched(SEQUEST MASCOT) 7 6

\*Des: Proteasome subunit alpha type 4

SEQUEST:(PepMatched Observed.Hits Coverage) 3 1 13.15%

| Seq | Charge | Xcor | Delta | Proability | PepHits |
|-----|--------|------|-------|------------|---------|
|-----|--------|------|-------|------------|---------|

|                |    |       |       |        |   |
|----------------|----|-------|-------|--------|---|
| RPFVGSLLYIGWDK | +2 | 3.693 | 0.458 | 0.9999 | 2 |
|----------------|----|-------|-------|--------|---|

|            |       |       |        |   |
|------------|-------|-------|--------|---|
| VEIATLTR+2 | 2.760 | 0.277 | 0.9949 | 4 |
|------------|-------|-------|--------|---|

|            |    |       |       |        |   |
|------------|----|-------|-------|--------|---|
| LLDEVFFSEK | +2 | 3.253 | 0.407 | 0.9997 | 8 |
|------------|----|-------|-------|--------|---|

MASCOT:(PepMatched Observed.Hits Coverage) 3 1 13.15%

| Seq | Charge | ObservedMS | ExpectedMS | CalculatedMS | Pepscore | PepHits |
|-----|--------|------------|------------|--------------|----------|---------|
|-----|--------|------------|------------|--------------|----------|---------|

|            |        |        |        |      |    |   |
|------------|--------|--------|--------|------|----|---|
| VEIATLTR+2 | 451.77 | 901.53 | 901.52 | 0.01 | 44 | 4 |
|------------|--------|--------|--------|------|----|---|

|            |    |        |         |         |      |    |    |
|------------|----|--------|---------|---------|------|----|----|
| LLDEVFFSEK | +2 | 613.82 | 1225.63 | 1225.62 | 0.01 | 60 | 10 |
|------------|----|--------|---------|---------|------|----|----|

|                |    |        |         |         |      |    |   |
|----------------|----|--------|---------|---------|------|----|---|
| RPFVGSLLYIGWDK | +2 | 825.96 | 1649.91 | 1649.89 | 0.02 | 46 | 2 |
|----------------|----|--------|---------|---------|------|----|---|

No. 178. Protein IPI00364046 Matched (SEQUEST MASCOT) N Y emPAI Strategy.Hits 0.3 2 PepMatched(SEQUEST MASCOT) 0 3 SpectraMatched(SEQUEST MASCOT) 0 49

\*Des: Tubulin alpha-6 chain

SEQUEST:(PepMatched Observed.Hits Coverage) 3 2 11.37%

| Seq | Charge | ObservedMS | ExpectedMS | CalculatedMS | Pepscore | PepHits |
|-----|--------|------------|------------|--------------|----------|---------|
|-----|--------|------------|------------|--------------|----------|---------|

|               |    |          |           |           |      |    |    |
|---------------|----|----------|-----------|-----------|------|----|----|
| TIQFVDWCPTGFK | +2 | 771.3825 | 1540.7505 | 1540.7384 | 0.01 | 68 | 11 |
|---------------|----|----------|-----------|-----------|------|----|----|

|                   |    |          |           |           |      |    |    |
|-------------------|----|----------|-----------|-----------|------|----|----|
| VGINYQPPTVVPGDLAR | +2 | 927.0067 | 1851.9988 | 1851.9842 | 0.01 | 69 | 13 |
|-------------------|----|----------|-----------|-----------|------|----|----|

|                   |    |          |           |           |      |    |    |
|-------------------|----|----------|-----------|-----------|------|----|----|
| GHYTIGKEIIDLVLDLR | +4 | 528.8084 | 2111.2043 | 2110.1898 | 1.01 | 54 | 10 |
|-------------------|----|----------|-----------|-----------|------|----|----|

No. 179. Protein IPI00339114 Matched (SEQUEST MASCOT) Y Y emPAI Strategy.Hits 0.06 1 PepMatched(SEQUEST MASCOT) 2 2 SpectraMatched(SEQUEST MASCOT) 5 6

\*Des: Tyrosine-protein phosphatase, non-receptor type 6

SEQUEST:(PepMatched Observed.Hits Coverage) 2 1 4.48%

| Seq | Charge | Xcor | Delta | Proability | PepHits |
|-----|--------|------|-------|------------|---------|
|-----|--------|------|-------|------------|---------|

|           |    |       |       |        |   |
|-----------|----|-------|-------|--------|---|
| VNAADIENR | +2 | 3.113 | 0.418 | 0.9987 | 4 |
|-----------|----|-------|-------|--------|---|

|                   |    |       |       |        |   |
|-------------------|----|-------|-------|--------|---|
| TGTIIVIDMLMESVSTK | +2 | 4.667 | 0.598 | 1.0000 | 2 |
|-------------------|----|-------|-------|--------|---|

MASCOT:(PepMatched Observed.Hits Coverage) 2 1 4.48%

| Identified Human Platelet Proteins          |                                                                   |                                 |              |                      |                                   |                                       |         |       |    |   |
|---------------------------------------------|-------------------------------------------------------------------|---------------------------------|--------------|----------------------|-----------------------------------|---------------------------------------|---------|-------|----|---|
| Seq                                         | Charge                                                            | ObservedMS                      | ExpectedMS   | CalculatedMS         | Pepscore                          | PepHits                               |         |       |    |   |
| VNAADIENR                                   |                                                                   | +2                              | 501.2585     | 1000.5025            | 1000.4937                         | 0.01                                  | 61      | 4     |    |   |
| TGTIIVIDMLMESVSTK                           |                                                                   | +2                              | 919.5006     | 1836.9867            | 1836.9576                         | 0.03                                  |         | 104   | 2  |   |
| <b>No.</b>                                  | <b>Protein</b>                                                    | <b>Matched (SEQUEST MASCOT)</b> | <b>emPAI</b> | <b>Strategy.Hits</b> | <b>PepMatched(SEQUEST MASCOT)</b> | <b>SpectraMatched(SEQUEST MASCOT)</b> |         |       |    |   |
| 180.                                        | IPI00196656                                                       | Y                               | Y            | 0.09                 | 2                                 | 2                                     | 8       | 4     | 34 |   |
| <b>*Des:</b>                                | Ba1-667                                                           |                                 |              |                      |                                   |                                       |         |       |    |   |
| SEQUEST:(PepMatched Observed.Hits Coverage) |                                                                   |                                 |              |                      |                                   |                                       |         |       |    |   |
|                                             | Seq                                                               | Charge                          | Xcor         | Delta                | Proability                        | PepHits                               |         |       |    |   |
|                                             | EGVCPEGSIDSAPVK                                                   |                                 |              | +2                   | 2.770                             | 0.299                                 | 0.9819  | 1     |    |   |
|                                             | HQTVLENTNGK                                                       |                                 |              | +2                   | 3.658                             | 0.511                                 | 1.0000  | 5     |    |   |
| MASCOT:(PepMatched Observed.Hits Coverage)  |                                                                   |                                 |              |                      |                                   |                                       |         |       |    |   |
|                                             | Seq                                                               | Charge                          | ObservedMS   | ExpectedMS           | CalculatedMS                      | Pepscore                              | PepHits |       |    |   |
|                                             | GYAVAVVK                                                          |                                 |              | +2                   | 485.27                            | 968.53                                | 968.53  | 0     | 48 | 1 |
|                                             | ASDSSINWNNLK                                                      |                                 |              | +2                   | 674.83                            | 1347.64                               | 1347.64 | 0     | 51 | 1 |
|                                             | GTDFQLNQLQGK                                                      |                                 |              | +2                   | 674.85                            | 1347.68                               | 1347.68 | 0     | 58 | 1 |
|                                             | LYLGHSYVTAIR                                                      |                                 |              | +2                   | 696.89                            | 1391.76                               | 1391.76 | 0     | 65 | 2 |
|                                             | HTTIFEVLPQK                                                       |                                 |              | +3                   | 438.25                            | 1311.72                               | 1311.72 | 0     | 42 | 8 |
|                                             | DFQLFGSPLGK                                                       |                                 |              | +2                   | 603.85                            | 1205.68                               | 1207.62 | -1.93 | 58 | 3 |
|                                             | NGDGKEDIWEILK                                                     |                                 |              | +2                   | 815.43                            | 1628.84                               | 1628.84 | 0     | 43 | 8 |
|                                             | LPEGTTYEYLGAEYLQAVGNIR                                            |                                 |              | +3                   | 862.76                            | 2585.27                               | 2585.26 | 0.01  | 43 | 7 |
| <b>No.</b>                                  | <b>Protein</b>                                                    | <b>Matched (SEQUEST MASCOT)</b> | <b>emPAI</b> | <b>Strategy.Hits</b> | <b>PepMatched(SEQUEST MASCOT)</b> | <b>SpectraMatched(SEQUEST MASCOT)</b> |         |       |    |   |
| 181.                                        | IPI00195929                                                       | Y                               | N            | 0.16                 | 1                                 | 6                                     | 0       | 11    | 0  |   |
| <b>*Des:</b>                                | CLIP-115 protein                                                  |                                 |              |                      |                                   |                                       |         |       |    |   |
| SEQUEST:(PepMatched Observed.Hits Coverage) |                                                                   |                                 |              |                      |                                   |                                       |         |       |    |   |
|                                             | Seq                                                               | Charge                          | Xcor         | Delta                | Proability                        | PepHits                               |         |       |    |   |
|                                             | MLDYEMLQR                                                         |                                 |              | +2                   | 2.705                             | 0.345                                 | 0.9958  | 1     |    |   |
|                                             | ATLNSGPGAQK                                                       |                                 |              | +2                   | 3.218                             | 0.440                                 | 0.9993  | 7     |    |   |
|                                             | ALVEGIKMEHQLELGNLQAK                                              |                                 |              | +3                   | 4.152                             | 0.422                                 | 1.0000  | 2     |    |   |
|                                             | LLSASKEHQR                                                        |                                 |              | +2                   | 2.805                             | 0.428                                 | 0.9941  | 2     |    |   |
|                                             | QASGPSSAGATTTVSEKPGPK                                             |                                 |              | +3                   | 3.366                             | 0.487                                 | 1.0000  | 5     |    |   |
|                                             | HSSPVGRPSIGSASSSVVASASGSK                                         |                                 |              | +3                   | 3.757                             | 0.408                                 | 0.9999  | 1     |    |   |
| MASCOT:(PepMatched Observed.Hits Coverage)  |                                                                   |                                 |              |                      |                                   |                                       |         |       |    |   |
| <b>No.</b>                                  | <b>Protein</b>                                                    | <b>Matched (SEQUEST MASCOT)</b> | <b>emPAI</b> | <b>Strategy.Hits</b> | <b>PepMatched(SEQUEST MASCOT)</b> | <b>SpectraMatched(SEQUEST MASCOT)</b> |         |       |    |   |
| 182.                                        | IPI00371266                                                       | N                               | Y            | 1.04                 | 1                                 | 0                                     | 2       | 0     | 4  |   |
| <b>*Des:</b>                                | PREDICTED: similar to alpha NAC/1.9.2. protein                    |                                 |              |                      |                                   |                                       |         |       |    |   |
| SEQUEST:(PepMatched Observed.Hits Coverage) |                                                                   |                                 |              |                      |                                   |                                       |         |       |    |   |
| MASCOT:(PepMatched Observed.Hits Coverage)  |                                                                   |                                 |              |                      |                                   |                                       |         |       |    |   |
|                                             | Seq                                                               | Charge                          | ObservedMS   | ExpectedMS           | CalculatedMS                      | Pepscore                              | PepHits |       |    |   |
|                                             | IEDLSQQAQLAAAEK                                                   |                                 |              | +2                   | 807.92                            | 1613.83                               | 1613.83 | 0     | 79 | 2 |
|                                             | SPASDTYIVFGEAK                                                    |                                 |              | +2                   | 743.37                            | 1484.73                               | 1483.72 | 1.01  | 70 | 2 |
| <b>No.</b>                                  | <b>Protein</b>                                                    | <b>Matched (SEQUEST MASCOT)</b> | <b>emPAI</b> | <b>Strategy.Hits</b> | <b>PepMatched(SEQUEST MASCOT)</b> | <b>SpectraMatched(SEQUEST MASCOT)</b> |         |       |    |   |
| 183.                                        | IPI00211731                                                       | Y                               | Y            | 0.13                 | 3                                 | 4                                     | 4       | 5     | 5  |   |
| <b>*Des:</b>                                | 1-phosphatidylinositol-4,5-bisphosphate phosphodiesterase gamma 2 |                                 |              |                      |                                   |                                       |         |       |    |   |

Identified Human Platelet Proteins

| No.   | Protein                                                             | Matched (SEQUEST MASCOT) | emPAI      | Strategy.Hits | PepMatched(SEQUEST MASCOT) | SpectraMatched(SEQUEST MASCOT) |        |    |          |         |
|-------|---------------------------------------------------------------------|--------------------------|------------|---------------|----------------------------|--------------------------------|--------|----|----------|---------|
| 184.  | IPI00203712                                                         | Y                        | N          | 0.3           | 1                          | 2                              | 0      | 2  | 0        |         |
| *Des: | Interferon gamma inducible protein 1                                |                          |            |               |                            |                                |        |    |          |         |
|       | SEQUEST:(PepMatched Observed.Hits Coverage) 2 1 13.95%              |                          |            |               |                            |                                |        |    |          |         |
|       | Seq                                                                 | Charge                   | Xcor       | Delta         | Proability                 | PepHits                        |        |    |          |         |
|       | HMFALLLPNISDASIELK                                                  |                          |            | +3            | 3.767                      | 0.326                          | 0.9983 | 1  |          |         |
|       | IFLISNFDLDAFDFPK                                                    |                          |            | +2            | 4.564                      | 0.525                          | 1.0000 | 1  |          |         |
|       | MASCOT:(PepMatched Observed.Hits Coverage)                          |                          |            |               |                            |                                |        |    |          |         |
| 185.  | IPI00213190                                                         | Y                        | Y          | 1.04          | 1                          | 6                              | 3      | 19 | 12       |         |
| *Des: | Branched-chain-amino-acid aminotransferase, mitochondrial precursor |                          |            |               |                            |                                |        |    |          |         |
|       | SEQUEST:(PepMatched Observed.Hits Coverage) 6 1 21.25%              |                          |            |               |                            |                                |        |    |          |         |
|       | Seq                                                                 | Charge                   | Xcor       | Delta         | Proability                 | PepHits                        |        |    |          |         |
|       | AADLQVQVTR                                                          |                          |            | +2            | 3.611                      | 0.396                          | 0.9996 | 4  |          |         |
|       | LGGNYGPTVAVQQAQK                                                    |                          |            | +2            | 4.875                      | 0.519                          | 1.0000 | 10 |          |         |
|       | KPAPSQPLLFGK                                                        |                          |            | +2            | 2.993                      | 0.408                          | 0.9987 | 2  |          |         |
|       | AIQYG TSAHDWMLR+2                                                   |                          |            |               | 3.813                      | 0.471                          | 0.9998 | 3  |          |         |
|       | LFRPWLNMDR                                                          |                          |            | +3            | 3.295                      | 0.293                          | 0.9983 | 1  |          |         |
|       | QLHIPTMENGPELILR                                                    |                          |            | +3            | 3.827                      | 0.427                          | 0.9999 | 2  |          |         |
|       | MASCOT:(PepMatched Observed.Hits Coverage) 3 1 11%                  |                          |            |               |                            |                                |        |    |          |         |
|       | Seq                                                                 | Charge                   | ObservedMS | ExpectedMS    | CalculatedMS               |                                |        |    | Pepscore | PepHits |
|       | AADLQVQVTR                                                          |                          | +2         | 550.81        | 1099.61                    | 1099.60                        | 0.01   | 78 | 4        |         |
|       | LGGNYGPTVAVQQAQK                                                    |                          | +2         | 880.46        | 1758.91                    | 1758.89                        | 0.02   | 95 | 10       |         |
|       | AIQYG TSAHDWMLR+2                                                   |                          | +2         | 824.91        | 1647.80                    | 1647.78                        | 0.02   | 81 | 4        |         |
| 186.  | IPI00566742                                                         | N                        | Y          | 0.18          | 1                          | 0                              | 2      | 0  | 2        |         |
| *Des: | 23 kDa protein                                                      |                          |            |               |                            |                                |        |    |          |         |
|       | SEQUEST:(PepMatched Observed.Hits Coverage)                         |                          |            |               |                            |                                |        |    |          |         |
|       | MASCOT:(PepMatched Observed.Hits Coverage) 2 1 14.7%                |                          |            |               |                            |                                |        |    |          |         |
|       | Seq                                                                 | Charge                   | ObservedMS | ExpectedMS    | CalculatedMS               |                                |        |    | Pepscore | PepHits |
|       | GASQAGMTGYGMPR                                                      |                          | +2         | 692.3223      | 1382.6300                  | 1382.6070                      | 0.02   | 50 | 1        |         |
|       | TTDIFQTVDLWEGK                                                      |                          | +2         | 826.9251      | 1651.8357                  | 1651.8093                      | 0.03   | 45 | 1        |         |

Identified Human Platelet Proteins

| No.   | Protein                                                         | Matched (SEQUEST MASCOT) | emPAI      | Strategy.Hits | PepMatched(SEQUEST MASCOT) | SpectraMatched(SEQUEST MASCOT) |
|-------|-----------------------------------------------------------------|--------------------------|------------|---------------|----------------------------|--------------------------------|
| 187.  | IPI00193247                                                     | Y N                      | 0.07       | 1             | 2                          | 0 2 0                          |
| *Des: | PREDICTED: similar to cellular apoptosis susceptibility protein |                          |            |               |                            |                                |
|       | SEQUEST:(PepMatched Observed.Hits Coverage)                     |                          |            | 2             | 1                          | 5.06%                          |
|       | Seq                                                             | Charge Xcor              | Delta      | Probility     | PepHits                    |                                |
|       | SFSLLEAIPIYIPTLITQLTQK                                          | +3                       | 4.225      | 0.525         | 1.0000                     | 1                              |
|       | HGITQANELVNLTEFFVNHILPDLK                                       | +3                       | 5.802      | 0.591         | 1.0000                     | 2                              |
|       | MASCOT:(PepMatched Observed.Hits Coverage)                      |                          |            |               |                            |                                |
| No.   | Protein                                                         | Matched (SEQUEST MASCOT) | emPAI      | Strategy.Hits | PepMatched(SEQUEST MASCOT) | SpectraMatched(SEQUEST MASCOT) |
| 188.  | IPI00192445                                                     | N Y                      | 1.04       | 1             | 0                          | 2 0 16                         |
| *Des: | Vps24p                                                          |                          |            |               |                            |                                |
|       | SEQUEST:(PepMatched Observed.Hits Coverage)                     |                          |            | 2             | 1                          | 10.13%                         |
|       | MASCOT:(PepMatched Observed.Hits Coverage)                      |                          |            |               |                            |                                |
|       | Seq                                                             | Charge                   | ObservedMS | ExpectedMS    | CalculatedMS               | Pepscore PepHits               |
|       | IPEIQATMR                                                       | +2                       | 529.79     | 1057.56       | 1057.56                    | 0 51 3                         |
|       | ILFEITAGALGK                                                    | +2                       | 616.87     | 1231.73       | 1231.72                    | 0.01 84 15                     |
| No.   | Protein                                                         | Matched (SEQUEST MASCOT) | emPAI      | Strategy.Hits | PepMatched(SEQUEST MASCOT) | SpectraMatched(SEQUEST MASCOT) |
| 189.  | IPI00563401                                                     | N Y                      | 0.17       | 1             | 0                          | 3 0 5                          |
| *Des: | PREDICTED: hypothetical protein XP_579397                       |                          |            |               |                            |                                |
|       | SEQUEST:(PepMatched Observed.Hits Coverage)                     |                          |            | 3             | 1                          | 3.47%                          |
|       | MASCOT:(PepMatched Observed.Hits Coverage)                      |                          |            |               |                            |                                |
|       | Seq                                                             | Charge                   | ObservedMS | ExpectedMS    | CalculatedMS               | Pepscore PepHits               |
|       | STVVSTAVALAAHK                                                  | +2                       | 678.86     | 1355.71       | 1353.76                    | 1.95 45 1                      |
|       | IPAFGSIPIEFR                                                    | +2                       | 673.88     | 1345.74       | 1345.74                    | 0 46 2                         |
|       | TLLRPEEILLSIEIPYSK                                              | +3                       | 705.41     | 2113.22       | 2113.20                    | 0.02 48 4                      |
| No.   | Protein                                                         | Matched (SEQUEST MASCOT) | emPAI      | Strategy.Hits | PepMatched(SEQUEST MASCOT) | SpectraMatched(SEQUEST MASCOT) |
| 190.  | IPI00205248                                                     | Y Y                      | 0.9        | 1             | 2                          | 3 4 8                          |
| *Des: | Phospholipase A2, membrane associated precursor                 |                          |            |               |                            |                                |
|       | SEQUEST:(PepMatched Observed.Hits Coverage)                     |                          |            | 2             | 1                          | 10.73%                         |
|       | MASCOT:(PepMatched Observed.Hits Coverage)                      |                          |            | 3             | 1                          | 16.77%                         |
|       | Seq                                                             | Charge Xcor              | Delta      | Probility     | PepHits                    |                                |
|       | GGQISCSTNQDSCR                                                  | +2                       | 4.428      | 0.564         | 1.0000                     | 3                              |
|       | GGQISCSTNQDSCRK                                                 | +2                       | 3.616      | 0.448         | 0.9995                     | 1                              |
|       | Seq                                                             | Charge                   | ObservedMS | ExpectedMS    | CalculatedMS               | Pepscore PepHits               |
|       | GGQISCSTNQDSCR                                                  | +2                       | 728.3088   | 1454.6030     | 1454.5878                  | 0.02 100 4                     |
|       | AAAEFCFAR                                                       | +2                       | 419.6996   | 837.3846      | 837.3803                   | 0 43 5                         |
|       | GGQISCSTNQDSCRK                                                 | +2                       | 792.3568   | 1582.6991     | 1582.6828                  | 0.02 70 1                      |
| No.   | Protein                                                         | Matched (SEQUEST MASCOT) | emPAI      | Strategy.Hits | PepMatched(SEQUEST MASCOT) | SpectraMatched(SEQUEST MASCOT) |
| 191.  | IPI00555312                                                     | Y Y                      | 1.9        | 1             | 7                          | 9 14 17                        |
| *Des: | Protease (Prosome, macropain) 28 subunit, alpha                 |                          |            |               |                            |                                |
|       | SEQUEST:(PepMatched Observed.Hits Coverage)                     |                          |            | 7             | 1                          | 30.76%                         |
|       | Seq                                                             | Charge Xcor              | Delta      | Probility     | PepHits                    |                                |

Identified Human Platelet Proteins

| Seq                                                   | Charge | ObservedMS | ExpectedMS | CalculatedMS | PepScore | PepHits |
|-------------------------------------------------------|--------|------------|------------|--------------|----------|---------|
| NAYAVLYDIILK                                          | +2     | 3.988      | 0.501      | 1.0000       | 6        |         |
| EPALNEANLSNLK                                         | +2     | 3.002      | 0.539      | 0.9999       | 2        |         |
| QLVHELDEAEYQEIR                                       | +2     | 4.215      | 0.535      | 1.0000       | 4        |         |
| APLDIPVDPVKEK                                         | +2     | 3.267      | 0.487      | 0.9943       | 3        |         |
| APLDIPVDPVK                                           | +2     | 2.865      | 0.319      | 0.9947       | 2        |         |
| VFELMTSLHTK                                           | +2     | 3.254      | 0.343      | 0.9989       | 1        |         |
| KISELDAFLKEPALNEANLSNLK                               | +3     | 5.584      | 0.471      | 1.0000       | 2        |         |
| MASCOT:(PepMatched Observed.Hits Coverage) 9 1 33.84% |        |            |            |              |          |         |
| IVVLLQR                                               | +2     | 420.79     | 839.56     | 839.56       | 0        | 41 2    |
| EPALNEANLSNLK                                         | +2     | 706.88     | 1411.74    | 1411.73      | 0.01     | 58 2    |
| APLDIPVDPVKEK                                         | +2     | 759.44     | 1516.86    | 1516.85      | 0.01     | 52 3    |
| QLVHELDEAEYQEIR                                       | +2     | 936.47     | 1870.92    | 1870.91      | 0.01     | 77 4    |
| APLDIPVDPVK                                           | +2     | 630.87     | 1259.72    | 1259.71      | 0.01     | 53 2    |
| ISELDAFLK                                             | +2     | 519.27     | 1036.53    | 1034.56      | 1.97     | 56 3    |
| TENLLGSYFPK                                           | +2     | 634.83     | 1267.65    | 1267.64      | 0.01     | 65 6    |
| KISELDAFLKEPALNEANLSNLK                               | +3     | 853.14     | 2556.40    | 2556.38      | 0.02     | 61 1    |
| NAYAVLYDIILK                                          | +2     | 698.40     | 1394.79    | 1394.78      | 0.01     | 93 6    |

No. 192. Protein IPI00211593 Matched (SEQUEST MASCOT) N Y emPAI Strategy.Hits 0.62 1 PepMatched(SEQUEST MASCOT) 0 SpectraMatched(SEQUEST MASCOT) 3 0 4

\*Des: Superoxide dismutase [Mn], mitochondrial precursor

| Seq                                                   | Charge | ObservedMS | ExpectedMS | CalculatedMS | PepScore | PepHits |
|-------------------------------------------------------|--------|------------|------------|--------------|----------|---------|
| SEQUEST:(PepMatched Observed.Hits Coverage)           |        |            |            |              |          |         |
| MASCOT:(PepMatched Observed.Hits Coverage) 3 1 17.69% |        |            |            |              |          |         |
| GELLEAIKR                                             | +2     | 514.8415   | 1027.6684  | 1027.6025    | 0.07     | 41 2    |
| GDVTTQVALQPALK                                        | +2     | 720.9592   | 1439.9038  | 1439.7984    | 0.11     | 66 1    |
| AIWNVINWENVSQR                                        | +2     | 865.0145   | 1728.0144  | 1727.8743    | 0.14     | 54 1    |

No. 193. Protein IPI00421513 Matched (SEQUEST MASCOT) N Y emPAI Strategy.Hits 0.15 1 PepMatched(SEQUEST MASCOT) 0 SpectraMatched(SEQUEST MASCOT) 2 0 3

\*Des: Aspartate aminotransferase, cytoplasmic

| Seq                                                  | Charge | ObservedMS | ExpectedMS | CalculatedMS | PepScore | PepHits |
|------------------------------------------------------|--------|------------|------------|--------------|----------|---------|
| SEQUEST:(PepMatched Observed.Hits Coverage)          |        |            |            |              |          |         |
| MASCOT:(PepMatched Observed.Hits Coverage) 2 1 4.53% |        |            |            |              |          |         |
| VNLGVGAYR                                            | +2     | 474.76     | 947.52     | 947.52       | 0        | 52 1    |
| IGADFLAR                                             | +2     | 431.74     | 861.47     | 861.47       | 0        | 51 2    |

No. 194. Protein IPI00210938 Matched (SEQUEST MASCOT) Y Y emPAI Strategy.Hits 0.21 2 PepMatched(SEQUEST MASCOT) 3 SpectraMatched(SEQUEST MASCOT) 6 3 9

\*Des: PREDICTED: similar to Ctps protein

| Seq                                                   | Charge | Xcor  | Delta | Proability | PepHits |
|-------------------------------------------------------|--------|-------|-------|------------|---------|
| SEQUEST:(PepMatched Observed.Hits Coverage) 3 1 5.04% |        |       |       |            |         |
| LTKDNNLTGK                                            | +2     | 3.251 | 0.399 | 0.9954     | 2       |
| GVIASSVGTILK                                          | +2     | 2.934 | 0.438 | 0.9987     | 1       |
| TSHPVVIDMPEHNPGQMGGTMR                                | +3     | 4.330 | 0.588 | 1.0000     | 3       |
| MASCOT:(PepMatched Observed.Hits Coverage) 6 2 8.92%  |        |       |       |            |         |



Identified Human Platelet Proteins

| Seq               | Charge | ObservedMS | ExpectedMS | CalculatedMS | Pepscore | PepHits |
|-------------------|--------|------------|------------|--------------|----------|---------|
| FVGQDVEGER        | +2     | 568.77     | 1135.53    | 1134.53      | 1        | 49      |
| LYGDTDYLEER       | +2     | 687.32     | 1372.62    | 1372.61      | 0.01     | 74      |
| GVIASSVGTILK      | +2     | 573.30     | 1144.59    | 1143.69      | 0.9      | 62      |
| YILVTGGVISGIGK    | +2     | 688.91     | 1375.80    | 1375.81      | 0        | 99      |
| NVLGWQDANSTEFDPK  | +2     | 910.93     | 1819.84    | 1819.84      | 0        | 69      |
| VPLLLLEEQGVVDYFLR | +2     | 945.52     | 1889.03    | 1889.03      | 0        | 97      |

No. 195. Protein IPI00368400 Matched (SEQUEST MASCOT) Y N emPAI 0.15 Strategy.Hits 2 PepMatched(SEQUEST MASCOT) 2 SpectraMatched(SEQUEST MASCOT) 6 0

\*Des: PREDICTED: similar to Eno1 protein

| Seq                                                   | Charge | Xcor  | Delta | Proability | PepHits |
|-------------------------------------------------------|--------|-------|-------|------------|---------|
| SEQUEST:(PepMatched Observed.Hits Coverage) 2 2 9.54% |        |       |       |            |         |
| DATNVGDEGGFAPNILENK                                   | +2     | 5.628 | 0.557 | 0.9789     | 2       |
| DYPVVSIEDPFDQDDDAWQK                                  | +2     | 4.812 | 0.481 | 1.0000     | 1       |

MASCOT:(PepMatched Observed.Hits Coverage)

No. 196. Protein IPI00555171 Matched (SEQUEST MASCOT) Y Y emPAI 3.62 Strategy.Hits 5 PepMatched(SEQUEST MASCOT) 18 SpectraMatched(SEQUEST MASCOT) 139 112

\*Des: Transgelin 2

| Seq                                                      | Charge | Xcor  | Delta | Proability | PepHits |
|----------------------------------------------------------|--------|-------|-------|------------|---------|
| SEQUEST:(PepMatched Observed.Hits Coverage) 18 12 77.57% |        |       |       |            |         |
| NFSDNQLQEGK                                              | +2     | 4.217 | 0.428 | 1.0000     | 15      |
| DDGLFSGDPNWFPPK                                          | +2     | 4.381 | 0.535 | 1.0000     | 14      |
| QMEQISQFLQAAER                                           | +3     | 4.473 | 0.378 | 1.0000     | 8       |
| DDGLFSGDPNWFPPK                                          | +2     | 4.792 | 0.579 | 1.0000     | 8       |
| YGINTTDIFQTVDLWEGKNMACVQR                                | +3     | 5.347 | 0.562 | 1.0000     | 3       |
| YGINTTDIFQTVDLWEGK                                       | +2     | 6.425 | 0.591 | 1.0000     | 22      |
| DGTVLCCELINSLYPEGQAPVKK+2                                | +2     | 5.091 | 0.603 | 1.0000     | 7       |
| TLMNLGGLAVARDDGLFSGDPNWFPPK                              | +3     | 5.824 | 0.549 | 1.0000     | 6       |
| IEKQYDPDLEQILIQWITTQCRK+3                                | +3     | 3.798 | 0.501 | 1.0000     | 2       |
| ENFQNWCLKDGTVLCCELINSLYPEGQAPVKK                         | +3     | 6.976 | 0.593 | 1.0000     | 3       |
| IEKQYDPDLEQILIQWITTQCR                                   | +3     | 5.178 | 0.539 | 1.0000     | 5       |
| NVIGLQMG TNR                                             | +2     | 3.619 | 0.510 | 1.0000     | 20      |
| NFSDNQLQEGKNVIGLQMG TNR                                  | +3     | 4.994 | 0.425 | 1.0000     | 3       |
| TLMNLGGLAVAR                                             | +2     | 4.294 | 0.465 | 1.0000     | 39      |
| KGVSQPQGR                                                | +2     | 3.569 | 0.502 | 1.0000     | 18      |
| GVSQPQPGRENFNWLNK                                        | +2     | 4.080 | 0.423 | 0.9981     | 3       |
| KGVSQPQPGRENFNWLNK                                       | +3     | 3.846 | 0.382 | 0.9999     | 3       |
| TLMNLGGLAVARDDGLFSGDPNWFPPK                              | +3     | 5.369 | 0.542 | 1.0000     | 13      |

MASCOT:(PepMatched Observed.Hits Coverage) 12 13 39.71%

| Seq             | Charge | ObservedMS | ExpectedMS | CalculatedMS | Pepscore | PepHits |
|-----------------|--------|------------|------------|--------------|----------|---------|
| NFSDNQLQEGK     | +2     | 640.3041   | 1278.5936  | 1278.5840    | 0.01     | 86      |
| DDGLFSGDPNWFPPK | +2     | 861.9175   | 1721.8205  | 1721.8049    | 0.02     | 70      |
| DDGLFSGDPNWFPPK | +2     | 797.8690   | 1593.7234  | 1593.7099    | 0.01     | 75      |
| QMEQISQFLQAAER  | +2     | 839.9217   | 1677.8288  | 1677.8144    | 0.01     | 91      |
| NVIGLQMG TNR    | +2     | 601.8231   | 1201.6316  | 1201.6237    | 0.01     | 68      |

Identified Human Platelet Proteins

|                             |    |           |           |           |           |           |      |    |   |
|-----------------------------|----|-----------|-----------|-----------|-----------|-----------|------|----|---|
| TLMNLGGLAVAR                | +2 | 608.3513  | 1214.6881 | 1214.6805 | 0.01      | 87        | 32   |    |   |
| GVSQPQPGR                   | +2 | 463.2493  | 924.4840  | 924.4777  | 0.01      | 51        | 8    |    |   |
| NFSDNQLQEGKNVIGLQMGNTNR     |    |           | +3        | 821.7457  | 2462.2154 | 2462.1971 | 0.02 | 69 | 1 |
| KGVSQPQPGR                  | +2 | 527.2972  | 1052.5798 | 1052.5726 | 0.01      | 62        | 18   |    |   |
| GVSQPQPGRENFNWLK            | +2 | 993.0129  | 1984.0113 | 1983.9914 | 0.02      | 50        | 3    |    |   |
| KGVSQPQPGRENFNWLK           | +2 | 1057.0580 | 2112.1014 | 2112.0864 | 0.01      | 50        | 3    |    |   |
| TLMNLGGLAVARDDGLFSGDPNWFPPK | +3 |           | 973.8380  | 2918.4922 | 2918.4748 | 0.02      | 81   | 12 |   |

|          |                                             |                              |            |                 |                              |                                  |          |         |  |
|----------|---------------------------------------------|------------------------------|------------|-----------------|------------------------------|----------------------------------|----------|---------|--|
| No. 197. | Protein IPI00288140                         | Matched (SEQUEST MASCOT) Y Y | emPAI 0.44 | Strategy.Hits 1 | PepMatched(SEQUEST MASCOT) 2 | SpectraMatched(SEQUEST MASCOT) 3 | 2        | 22      |  |
| *Des:    | Ribose-phosphate pyrophosphokinase II       |                              |            |                 |                              |                                  |          |         |  |
|          | SEQUEST:(PepMatched Observed.Hits Coverage) |                              |            | 2               | 1                            | 11.45%                           |          |         |  |
|          | Seq                                         | Charge                       | Xcor       | Delta           | Proability                   | PepHits                          |          |         |  |
|          | FSNQETSVEIGESVR                             | +2                           |            | 4.479           | 0.519                        | 1.0000                           | 1        |         |  |
|          | INNAAFEAVVVTNTIPQEDK                        | +2                           |            | 5.660           | 0.546                        | 1.0000                           | 1        |         |  |
|          | MASCOT:(PepMatched Observed.Hits Coverage)  |                              |            | 3               | 2                            | 15.47%                           |          |         |  |
|          | Seq                                         | Charge                       | ObservedMS | ExpectedMS      | CalculatedMS                 |                                  | Pepscore | PepHits |  |
|          | FSNQETSVEIGESVR                             | +2                           | 841.41     | 1680.80         | 1680.80                      | 0                                | 81       | 1       |  |
|          | VYAILTHGIFSGPAISR                           | +2                           | 901.50     | 1800.98         | 1800.99                      | 0                                | 118      | 3       |  |
|          | IQVIDISMILAEAIR                             | +2                           | 842.99     | 1683.97         | 1683.96                      | 0.01                             | 120      | 18      |  |

|          |                                                                      |                              |            |                 |                              |                                   |           |         |    |    |
|----------|----------------------------------------------------------------------|------------------------------|------------|-----------------|------------------------------|-----------------------------------|-----------|---------|----|----|
| No. 198. | Protein IPI00562537                                                  | Matched (SEQUEST MASCOT) N Y | emPAI 1.08 | Strategy.Hits 2 | PepMatched(SEQUEST MASCOT) 0 | SpectraMatched(SEQUEST MASCOT) 19 | 0         | 252     |    |    |
| *Des:    | PREDICTED: similar to pyruvate kinase (EC 2.7.1.40) isozyme M2 - rat |                              |            |                 |                              |                                   |           |         |    |    |
|          | SEQUEST:(PepMatched Observed.Hits Coverage)                          |                              |            |                 |                              |                                   |           |         |    |    |
|          | MASCOT:(PepMatched Observed.Hits Coverage)                           |                              |            | 19              | 2                            | 46.95%                            |           |         |    |    |
|          | Seq                                                                  | Charge                       | ObservedMS | ExpectedMS      | CalculatedMS                 |                                   | Pepscore  | PepHits |    |    |
|          | GSRTAEVELK                                                           | +2                           | 495.7615   | 989.5085        | 989.5029                     | 0.01                              | 59        | 20      |    |    |
|          | LDIDSAPITAR                                                          | +2                           | 586.3235   | 1170.6324       | 1170.6244                    | 0.01                              | 84        | 69      |    |    |
|          | ITLDNAYMEK                                                           | +2                           | 599.2990   | 1196.5835       | 1196.5747                    | 0.01                              | 62        | 24      |    |    |
|          | KGATLKITLDNAYMEK                                                     | +3                           | 599.2990   | 1794.8752       | 1794.9549                    | -0.07                             | 44        | 24      |    |    |
|          | GDLGIEIPAEK                                                          | +2                           | 571.3123   | 1140.6101       | 1140.6026                    | 0.01                              | 56        | 22      |    |    |
|          | IYVDDGLISLQVK                                                        | +2                           | 731.9163   | 1461.8180       | 1461.8078                    | 0.01                              | 86        | 34      |    |    |
|          | GADYLVTEVENGGSLGSK                                                   | +2                           | 898.4412   | 1794.8679       | 1794.8635                    | 0                                 | 127       | 10      |    |    |
|          | DAVLDAWAEDVDLR                                                       | +2                           | 794.3924   | 1586.7702       | 1586.7576                    | 0.01                              | 93        | 20      |    |    |
|          | VNLAMNVGK                                                            | +2                           | 473.9076   | 945.8006        | 944.5113                     | 1.29                              | 56        | 9       |    |    |
|          | RFDEILEASDGIMVAR                                                     | +2                           | 911.4714   | 1820.9283       | 1820.9090                    | 0.02                              | 76        | 16      |    |    |
|          | KAADVHEVR                                                            | +2                           | 512.7838   | 1023.5531       | 1023.5461                    | 0.01                              | 64        | 15      |    |    |
|          | GSRTAEVELKK                                                          | +2                           | 559.8112   | 1117.6079       | 1117.5978                    | 0.01                              | 43        | 10      |    |    |
|          | APIIAVTR                                                             | +2                           | 420.7714   | 839.5283        | 839.5229                     | 0.01                              | 69        | 30      |    |    |
|          | PKPDSEAGTAFIQQLHAAMADTFLEHMCR                                        |                              |            | +4              | 861.9172                     | 3443.6396                         | 3443.6060 | 0.03    | 88 | 15 |
|          | NTGIICTIGPASR                                                        | +2                           | 651.8500   | 1301.6855       | 1301.6761                    | 0.01                              | 69        | 45      |    |    |
|          | MQHLIAR                                                              | +2                           | 434.7472   | 867.4798        | 867.4749                     | 0                                 | 44        | 7       |    |    |
|          | IISKIENHEGVR                                                         | +2                           | 697.8966   | 1393.7787       | 1393.7677                    | 0.01                              | 67        | 14      |    |    |
|          | LNFSHGTHEYHAETIK                                                     | +2                           | 942.4626   | 1882.9106       | 1882.8962                    | 0.01                              | 95        | 28      |    |    |
|          | KGDVVIVLTGWRPGSGFTNTMR                                               |                              |            | +3              | 797.7654                     | 2390.2745                         | 2390.2528 | 0.02    | 54 | 5  |

**Identified Human Platelet Proteins**

|              |                                                                |                                 |                   |                      |                                   |                                       |                |   |  |
|--------------|----------------------------------------------------------------|---------------------------------|-------------------|----------------------|-----------------------------------|---------------------------------------|----------------|---|--|
| <b>No.</b>   | <b>Protein</b>                                                 | <b>Matched (SEQUEST MASCOT)</b> | <b>emPAI</b>      | <b>Strategy.Hits</b> | <b>PepMatched(SEQUEST MASCOT)</b> | <b>SpectraMatched(SEQUEST MASCOT)</b> |                |   |  |
| 199.         | IPI00199203                                                    | Y N                             | 0.2               | 2                    | 3                                 | 0                                     | 16             | 0 |  |
| <b>*Des:</b> | PREDICTED: similar to glyceraldehyde-3-phosphate dehydrogenase |                                 |                   |                      |                                   |                                       |                |   |  |
|              | SEQUEST:(PepMatched Observed.Hits Coverage)                    |                                 |                   | 3                    | 2                                 |                                       | 17.3%          |   |  |
|              | <b>Seq</b>                                                     | <b>Charge</b>                   | <b>Xcor</b>       | <b>Delta</b>         | <b>Proability</b>                 | <b>PepHits</b>                        |                |   |  |
|              | GAAQNIIPASTGAAK                                                | +2                              |                   | 4.266                | 0.508                             | 0.9999                                | 20             |   |  |
|              | IVSNASCTTNCLTPLAK                                              | +2                              |                   | 3.228                | 0.182                             | 0.9526                                | 1              |   |  |
|              | VIHDNFGIVGGLMTTVHAITATQK                                       | +3                              |                   | 5.491                | 0.499                             | 1.0000                                | 1              |   |  |
|              | MASCOT:(PepMatched Observed.Hits Coverage)                     |                                 |                   |                      |                                   |                                       |                |   |  |
|              |                                                                |                                 |                   |                      |                                   |                                       |                |   |  |
| <b>No.</b>   | <b>Protein</b>                                                 | <b>Matched (SEQUEST MASCOT)</b> | <b>emPAI</b>      | <b>Strategy.Hits</b> | <b>PepMatched(SEQUEST MASCOT)</b> | <b>SpectraMatched(SEQUEST MASCOT)</b> |                |   |  |
| 200.         | IPI00325146                                                    | N Y                             | 0.02              | 1                    | 0                                 | 2                                     | 0              | 4 |  |
| <b>*Des:</b> | Annexin A2                                                     |                                 |                   |                      |                                   |                                       |                |   |  |
|              | SEQUEST:(PepMatched Observed.Hits Coverage)                    |                                 |                   |                      |                                   |                                       |                |   |  |
|              | MASCOT:(PepMatched Observed.Hits Coverage)                     |                                 |                   | 2                    | 1                                 |                                       | 4.34%          |   |  |
|              | <b>Seq</b>                                                     | <b>Charge</b>                   | <b>ObservedMS</b> | <b>ExpectedMS</b>    | <b>CalculatedMS</b>               | <b>Pepscore</b>                       | <b>PepHits</b> |   |  |
|              | QDIAFAYQR                                                      | +2                              | 556.2870          | 1110.5595            | 1110.5458                         | 0.01                                  | 45             | 2 |  |
|              | SNAQRQDIAFAYQR                                                 | +3                              | 556.2870          | 1665.8393            | 1666.8175                         | -0.97                                 | 37             | 4 |  |
|              |                                                                |                                 |                   |                      |                                   |                                       |                |   |  |
| <b>No.</b>   | <b>Protein</b>                                                 | <b>Matched (SEQUEST MASCOT)</b> | <b>emPAI</b>      | <b>Strategy.Hits</b> | <b>PepMatched(SEQUEST MASCOT)</b> | <b>SpectraMatched(SEQUEST MASCOT)</b> |                |   |  |
| 201.         | IPI00325147                                                    | Y N                             | 0.44              | 1                    | 5                                 | 0                                     | 10             | 0 |  |
| <b>*Des:</b> | Farnesyl pyrophosphate synthetase                              |                                 |                   |                      |                                   |                                       |                |   |  |
|              | SEQUEST:(PepMatched Observed.Hits Coverage)                    |                                 |                   | 5                    | 1                                 |                                       | 20.05%         |   |  |
|              | <b>Seq</b>                                                     | <b>Charge</b>                   | <b>Xcor</b>       | <b>Delta</b>         | <b>Proability</b>                 | <b>PepHits</b>                        |                |   |  |
|              | VLTEDELGHPEK                                                   | +2                              |                   | 2.895                | 0.382                             | 0.9977                                | 4              |   |  |
|              | EVLEYNTVGGK                                                    | +2                              |                   | 3.250                | 0.478                             | 0.9997                                | 4              |   |  |
|              | ALYEELDLR                                                      | +2                              |                   | 2.851                | 0.394                             | 0.9988                                | 3              |   |  |
|              | GLTVVQTFQELVEPR                                                | +3                              |                   | 4.567                | 0.472                             | 1.0000                                | 4              |   |  |
|              | PGIGLDAINDALLLEAAIYR                                           | +3                              |                   | 4.013                | 0.496                             | 1.0000                                | 1              |   |  |
|              | MASCOT:(PepMatched Observed.Hits Coverage)                     |                                 |                   |                      |                                   |                                       |                |   |  |
|              |                                                                |                                 |                   |                      |                                   |                                       |                |   |  |
| <b>No.</b>   | <b>Protein</b>                                                 | <b>Matched (SEQUEST MASCOT)</b> | <b>emPAI</b>      | <b>Strategy.Hits</b> | <b>PepMatched(SEQUEST MASCOT)</b> | <b>SpectraMatched(SEQUEST MASCOT)</b> |                |   |  |
| 202.         | IPI00480673                                                    | N Y                             | 0.32              | 1                    | 0                                 | 2                                     | 0              | 5 |  |
| <b>*Des:</b> | Similar to Ras-related protein Rab-1B                          |                                 |                   |                      |                                   |                                       |                |   |  |
|              | SEQUEST:(PepMatched Observed.Hits Coverage)                    |                                 |                   |                      |                                   |                                       |                |   |  |
|              | MASCOT:(PepMatched Observed.Hits Coverage)                     |                                 |                   | 2                    | 1                                 |                                       | 16.58%         |   |  |
|              | <b>Seq</b>                                                     | <b>Charge</b>                   | <b>ObservedMS</b> | <b>ExpectedMS</b>    | <b>CalculatedMS</b>               | <b>Pepscore</b>                       | <b>PepHits</b> |   |  |
|              | VVDNTTAKEFADSLGVPFLETSK                                        | +3                              | 847.1664          | 2538.4774            | 2538.2853                         | 0.19                                  | 43             | 1 |  |
|              | TITSSYYR+2                                                     |                                 | 495.7809          | 989.5472             | 989.4818                          | 0.07                                  | 38             | 4 |  |
|              |                                                                |                                 |                   |                      |                                   |                                       |                |   |  |
| <b>No.</b>   | <b>Protein</b>                                                 | <b>Matched (SEQUEST MASCOT)</b> | <b>emPAI</b>      | <b>Strategy.Hits</b> | <b>PepMatched(SEQUEST MASCOT)</b> | <b>SpectraMatched(SEQUEST MASCOT)</b> |                |   |  |
| 203.         | IPI00197605                                                    | Y Y                             | 1.09              | 1                    | 4                                 | 4                                     | 4              | 5 |  |
| <b>*Des:</b> | SynaptoSomal-aSSociated protein 23                             |                                 |                   |                      |                                   |                                       |                |   |  |
|              | SEQUEST:(PepMatched Observed.Hits Coverage)                    |                                 |                   | 4                    | 1                                 |                                       | 29.9%          |   |  |
|              | <b>Seq</b>                                                     | <b>Charge</b>                   | <b>Xcor</b>       | <b>Delta</b>         | <b>Proability</b>                 | <b>PepHits</b>                        |                |   |  |
|              | IEEGMDQINK                                                     | +2                              |                   | 2.622                | 0.231                             | 0.9685                                | 2              |   |  |
|              | ITNGQPQQTGAASGGYIK                                             | +2                              |                   | 2.940                | 0.417                             | 0.9906                                | 1              |   |  |

| Identified Human Platelet Proteins |                                             |                          |            |               |                            |                                |      |    |          |         |
|------------------------------------|---------------------------------------------|--------------------------|------------|---------------|----------------------------|--------------------------------|------|----|----------|---------|
|                                    | ATWGDGGDSSPSNVVSK                           | +2                       | 4.445      | 0.609         | 1.0000                     | 1                              |      |    |          |         |
|                                    | TITMLDEQGEQLNR                              | +2                       | 4.277      | 0.355         | 0.9997                     | 1                              |      |    |          |         |
|                                    | MASCOT:(PepMatched Observed.Hits Coverage)  |                          | 4          | 1             | 29.9%                      |                                |      |    |          |         |
|                                    | Seq                                         | Charge                   | ObservedMS | ExpectedMS    | CalculatedMS               |                                |      |    | PepScore | PepHits |
|                                    | ITNGQPQQTGAASGGYIK                          | +2                       | 946.98     | 1891.94       | 1890.94                    | 1                              | 95   |    | 1        |         |
|                                    | IEEGMDQINK                                  | +2                       | 588.79     | 1175.56       | 1175.55                    | 0.01                           | 55   | 4  |          |         |
|                                    | ATWGDGGDSSPSNVVSK                           | +2                       | 832.39     | 1662.76       | 1662.75                    | 0.01                           | 98   |    | 1        |         |
|                                    | TITMLDEQGEQLNR                              | +2                       | 824.41     | 1646.80       | 1646.79                    | 0.01                           | 85   | 1  |          |         |
| No. 204.                           | Protein                                     | Matched (SEQUENT MASCOT) | emPAI      | Strategy.Hits | PepMatched(SEQUENT MASCOT) | SpectraMatched(SEQUENT MASCOT) |      |    |          |         |
|                                    | IPI00366735                                 | N                        | Y          | 0.13          | 1                          | 0                              | 2    | 0  | 3        |         |
| *Des:                              | PREDICTED: similar to mKIAA0089 protein     |                          |            |               |                            |                                |      |    |          |         |
|                                    | SEQUENT:(PepMatched Observed.Hits Coverage) |                          |            |               |                            |                                |      |    |          |         |
|                                    | MASCOT:(PepMatched Observed.Hits Coverage)  |                          | 2          | 1             | 5.36%                      |                                |      |    |          |         |
|                                    | Seq                                         | Charge                   | ObservedMS | ExpectedMS    | CalculatedMS               |                                |      |    | PepScore | PepHits |
|                                    | LQGPQTSAEVYR                                | +2                       | 674.85     | 1347.68       | 1347.68                    | 0                              | 44   |    | 1        |         |
|                                    | LGLMEMIAFAK                                 | +2                       | 612.33     | 1222.65       | 1222.65                    | 0                              | 67   |    | 2        |         |
| No. 205.                           | Protein                                     | Matched (SEQUENT MASCOT) | emPAI      | Strategy.Hits | PepMatched(SEQUENT MASCOT) | SpectraMatched(SEQUENT MASCOT) |      |    |          |         |
|                                    | IPI00198191                                 | Y                        | Y          | 1.42          | 1                          | 5                              | 5    | 11 | 11       |         |
| *Des:                              | Calcyclin binding protein                   |                          |            |               |                            |                                |      |    |          |         |
|                                    | SEQUENT:(PepMatched Observed.Hits Coverage) |                          | 5          | 1             | 43.77%                     |                                |      |    |          |         |
|                                    | Seq                                         | Charge                   | Xcor       | Delta         | Probability                | PepHits                        |      |    |          |         |
|                                    | ISNYGWDQSDK                                 | +2                       | 3.563      | 0.373         | 0.9997                     | 5                              |      |    |          |         |
|                                    | KPEFDNEKPAAVVAPLTTGYTVK                     | +3                       |            | 5.233         | 0.589                      | 1.0000                         |      |    | 1        |         |
|                                    | IYITLTGVHQVPAENVQVHFTER                     | +3                       |            | 6.730         | 0.597                      | 1.0000                         |      |    | 4        |         |
|                                    | EKPSYDTEADPSEGLMNVLK                        | +3                       |            | 3.336         | 0.273                      | 0.9932                         |      |    | 1        |         |
|                                    | NYSMIVNLLKPISESSK                           | +3                       |            | 4.412         | 0.432                      | 0.9999                         |      |    | 3        |         |
|                                    | MASCOT:(PepMatched Observed.Hits Coverage)  |                          | 5          | 1             | 38.19%                     |                                |      |    |          |         |
|                                    | Seq                                         | Charge                   | ObservedMS | ExpectedMS    | CalculatedMS               |                                |      |    | PepScore | PepHits |
|                                    | ISNYGWDQSDK                                 | +2                       | 656.80     | 1311.58       | 1311.57                    | 0.01                           | 75   | 5  |          |         |
|                                    | KPEFDNEKPAAVVAPLTTGYTVK                     | +3                       |            | 825.78        | 2474.33                    | 2474.31                        | 0.02 |    | 49       | 1       |
|                                    | SFDLLVK                                     | +2                       | 411.25     | 820.48        | 820.47                     | 0.01                           | 47   | 1  |          |         |
|                                    | IYITLTGVHQVPAENVQVHFTER                     | +3                       |            | 884.48        | 2650.42                    | 2650.39                        | 0.03 |    | 96       | 3       |
|                                    | NYSMIVNLLKPISESSK                           | +3                       |            | 741.73        | 2222.18                    | 2222.16                        | 0.02 |    | 61       | 2       |
| No. 206.                           | Protein                                     | Matched (SEQUENT MASCOT) | emPAI      | Strategy.Hits | PepMatched(SEQUENT MASCOT) | SpectraMatched(SEQUENT MASCOT) |      |    |          |         |
|                                    | IPI00196661                                 | Y                        | Y          | 0.69          | 5                          | 6                              | 6    | 79 | 41       |         |
| *Des:                              | 14-3-3 protein tau                          |                          |            |               |                            |                                |      |    |          |         |
|                                    | SEQUENT:(PepMatched Observed.Hits Coverage) |                          | 6          | 6             | 39.6%                      |                                |      |    |          |         |
|                                    | Seq                                         | Charge                   | Xcor       | Delta         | Probability                | PepHits                        |      |    |          |         |
|                                    | TAFDEAIAELDTLNEDSYK                         | +2                       |            | 5.959         | 0.635                      | 1.0000                         |      |    | 7        |         |
|                                    | DSTLIMQLLR                                  | +2                       |            | 3.890         | 0.244                      | 0.9988                         |      |    | 37       |         |
|                                    | AVTEQGAELSNEER                              | +2                       |            | 5.299         | 0.397                      | 1.0000                         |      |    | 18       |         |
|                                    | YLIANATNPESK                                | +2                       |            | 4.410         | 0.352                      | 0.9999                         |      |    | 24       |         |
|                                    | QTIENSQGAYQEAFDISK                          | +3                       |            | 3.713         | 0.441                      | 0.9999                         |      |    | 1        |         |
|                                    | KQTIENSQGAYQEAFDISK                         | +2                       |            | 6.242         | 0.600                      | 1.0000                         |      |    | 5        |         |

Identified Human Platelet Proteins

| No.   | Protein                                                  | Matched (SEQUEST MASCOT) | emPAI      | Strategy.Hits | PepMatched(SEQUEST MASCOT) | SpectraMatched(SEQUEST MASCOT) |
|-------|----------------------------------------------------------|--------------------------|------------|---------------|----------------------------|--------------------------------|
| 207.  | IPI00365792                                              | Y                        | Y          | 0.17          | 1                          | 2                              |
| *Des: | PREDICTED: similar to Stromal interaction molecule 1     |                          |            |               |                            |                                |
|       | SEQUEST:(PepMatched Observed.Hits Coverage) 2 1 3.29%    |                          |            |               |                            |                                |
|       | Seq                                                      | Charge                   | Xcor       | Delta         | Probility                  | PepHits                        |
|       | AVTEQGAELSNEER                                           | +2                       | 766.87     | 1531.72       | 1531.71                    | 0.01 106 19                    |
|       | YLIANATNPESK                                             | +2                       | 660.85     | 1319.68       | 1319.67                    | 0.01 85 24                     |
|       | QTIENSQGAYQEAFDISK                                       | +3                       | 676.99     | 2027.96       | 2027.94                    | 0.02 57 2                      |
|       | KQTIENSQGAYQEAFDISK                                      | +3                       | 719.69     | 2156.05       | 2156.04                    | 0.01 53 4                      |
|       | QTIENSQGAYQEAFDISKK                                      | +3                       | 719.69     | 2156.06       | 2156.04                    | 0.02 43 1                      |
|       | TAFDEAIAELDTLNEDSYK                                      | +3                       | 715.67     | 2144.00       | 2143.98                    | 0.02 93 4                      |
|       | MASCOT:(PepMatched Observed.Hits Coverage) 6 5 35.2%     |                          |            |               |                            |                                |
|       | Seq                                                      | Charge                   | ObservedMS | ExpectedMS    | CalculatedMS               | Pepscore PepHits               |
| 208.  | IPI00559603                                              | N                        | Y          | 0.11          | 2                          | 0                              |
| *Des: | 75 kDa protein                                           |                          |            |               |                            |                                |
|       | SEQUEST:(PepMatched Observed.Hits Coverage) 4 2 8.19%    |                          |            |               |                            |                                |
|       | MASCOT:(PepMatched Observed.Hits Coverage) 4 2 8.19%     |                          |            |               |                            |                                |
|       | Seq                                                      | Charge                   | ObservedMS | ExpectedMS    | CalculatedMS               | Pepscore PepHits               |
|       | YAELEEQVR                                                | +2                       | 633.31     | 1264.60       | 1264.59                    | 0.01 48 4                      |
|       | QALSEVTAALR                                              | +2                       | 579.83     | 1157.64       | 1157.64                    | 0 46 1                         |
|       | LISVEDLWK                                                | +2                       | 551.81     | 1101.61       | 1101.61                    | 0 43 1                         |
|       | MASCOT:(PepMatched Observed.Hits Coverage) 3 2 4.73%     |                          |            |               |                            |                                |
|       | Seq                                                      | Charge                   | ObservedMS | ExpectedMS    | CalculatedMS               | Pepscore PepHits               |
| 209.  | IPI00363182                                              | N                        | Y          | 0.28          | 1                          | 0                              |
| *Des: | PREDICTED: similar to solute carrier family 25, member 5 |                          |            |               |                            |                                |
|       | SEQUEST:(PepMatched Observed.Hits Coverage) 2 1 10.19%   |                          |            |               |                            |                                |
|       | MASCOT:(PepMatched Observed.Hits Coverage) 2 1 10.19%    |                          |            |               |                            |                                |
|       | Seq                                                      | Charge                   | ObservedMS | ExpectedMS    | CalculatedMS               | Pepscore PepHits               |
|       | DFLAGGVAAAIISK                                           | +2                       | 610.34     | 1218.66       | 1218.66                    | 0 89 5                         |
|       | GMGGAFVLVLYDEIKK                                         | +2                       | 870.48     | 1738.94       | 1738.93                    | 0.01 66 6                      |
|       | MASCOT:(PepMatched Observed.Hits Coverage) 4 2 6.81%     |                          |            |               |                            |                                |
|       | Seq                                                      | Charge                   | Xcor       | Delta         | Probility                  | PepHits                        |
| 210.  | IPI00211812                                              | Y                        | Y          | 0.12          | 2                          | 4                              |
| *Des: | Coatomer beta subunit                                    |                          |            |               |                            |                                |
|       | SEQUEST:(PepMatched Observed.Hits Coverage) 4 2 6.81%    |                          |            |               |                            |                                |
|       | Seq                                                      | Charge                   | Xcor       | Delta         | Probility                  | PepHits                        |

Identified Human Platelet Proteins

| Seq                                           | Charge | ObservedMS | ExpectedMS | CalculatedMS | PepScore | PepHits |       |
|-----------------------------------------------|--------|------------|------------|--------------|----------|---------|-------|
| LPGLLMTIIR                                    | +2     | 2.711      | 0.384      | 0.9978       | 1        |         |       |
| NFENLIPDAPELIHDFLVNEK                         | +3     | 4.124      | 0.394      | 0.9998       | 1        |         |       |
| LLLWFWEIVPK                                   | +2     | 3.162      | 0.339      | 0.9980       | 1        |         |       |
| QNSFVAEAMLLMATILHLGK                          | +3     | 3.923      | 0.498      | 1.0000       | 1        |         |       |
| MASCOT:(PepMatched Observed.Hits Coverage)    |        |            |            |              | 2        | 2       | 2.47% |
| Seq Charge ObservedMS ExpectedMS CalculatedMS |        |            |            |              |          |         |       |
| VLQDLVMDILR                                   | +2     | 658.3095   | 1314.6045  | 1313.7377    | 0.87     | 62      | 3     |
| LLLWFWEIVPK                                   | +2     | 678.9227   | 1355.8308  | 1355.8216    | 0.01     | 51      | 1     |

No. 211. Protein IPI00211813 Matched (SEQUEST MASCOT) Y Y emPAI Strategy.Hits 0.04 2 2 PepMatched(SEQUEST MASCOT) 3 12 SpectraMatched(SEQUEST MASCOT) 67

\*Des: Neuronal myosin heavy chain

| Seq                                                   | Charge | Xcor     | Delta     | Probability | PepHits |    |       |
|-------------------------------------------------------|--------|----------|-----------|-------------|---------|----|-------|
| SEQUEST:(PepMatched Observed.Hits Coverage) 2 3 1.18% |        |          |           |             |         |    |       |
| Seq Charge Xcor Delta Probability PepHits             |        |          |           |             |         |    |       |
| IAQLEEELEEEQGNTELINDR                                 | +3     | 5.568    | 0.459     | 1.0000      | 7       |    |       |
| IAQLEEELEEEQGNTELINDRLK                               | +3     | 5.110    | 0.493     | 1.0000      | 5       |    |       |
| MASCOT:(PepMatched Observed.Hits Coverage)            |        |          |           |             | 3       | 4  | 2.55% |
| Seq Charge ObservedMS ExpectedMS CalculatedMS         |        |          |           |             |         |    |       |
| IAQLEEELEEEQGNTELINDRLK                               | +3     | 905.1257 | 2712.3554 | 2712.3453   | 0.01    | 86 | 6     |
| AGVLAHLEER                                            | +2     | 612.3242 | 1222.6339 | 1222.6305   | 0       | 51 | 2     |
| KFDQLLAEEITKSAK                                       | +3     | 574.3234 | 1719.9483 | 1719.9406   | 0.01    | 42 | 4     |

No. 212. Protein IPI00209397 Matched (SEQUEST MASCOT) Y Y emPAI Strategy.Hits 0.3 1 3 PepMatched(SEQUEST MASCOT) 3 5 SpectraMatched(SEQUEST MASCOT) 8

\*Des: Coronin-1B

| Seq                                                  | Charge | Xcor     | Delta     | Probability | PepHits |    |      |
|------------------------------------------------------|--------|----------|-----------|-------------|---------|----|------|
| SEQUEST:(PepMatched Observed.Hits Coverage) 3 1 7.3% |        |          |           |             |         |    |      |
| Seq Charge Xcor Delta Probability PepHits            |        |          |           |             |         |    |      |
| VLVKEQGER                                            | +2     | 2.721    | 0.358     | 0.9849      | 3       |    |      |
| NVLSDSKPAGYSR                                        | +2     | 2.943    | 0.495     | 0.9994      | 1       |    |      |
| VGIITWHPTAR                                          | +3     | 3.266    | 0.402     | 1.0000      | 9       |    |      |
| MASCOT:(PepMatched Observed.Hits Coverage)           |        |          |           |             | 3       | 1  | 7.3% |
| Seq Charge ObservedMS ExpectedMS CalculatedMS        |        |          |           |             |         |    |      |
| VLVKEQGER                                            | +2     | 529.3079 | 1056.6012 | 1056.5927   | 0.01    | 41 | 3    |
| NVLSDSKPAGYSR                                        | +2     | 697.3632 | 1392.7119 | 1392.6997   | 0.01    | 59 | 1    |
| VGIITWHPTAR                                          | +3     | 417.5741 | 1249.7006 | 1249.6931   | 0.01    | 48 | 16   |

No. 213. Protein IPI00210941 Matched (SEQUEST MASCOT) Y Y emPAI Strategy.Hits 0.67 3 5 PepMatched(SEQUEST MASCOT) 3 17 SpectraMatched(SEQUEST MASCOT) 13

\*Des: Tropomyosin

| Seq                                                    | Charge | Xcor  | Delta | Probability | PepHits |   |        |
|--------------------------------------------------------|--------|-------|-------|-------------|---------|---|--------|
| SEQUEST:(PepMatched Observed.Hits Coverage) 5 6 26.48% |        |       |       |             |         |   |        |
| Seq Charge Xcor Delta Probability PepHits              |        |       |       |             |         |   |        |
| AREQAEAEVASLNR                                         | +2     | 5.152 | 0.554 | 1.0000      | 1       |   |        |
| KIQVLQQQADDAEERAER                                     | +3     | 4.151 | 0.455 | 1.0000      | 9       |   |        |
| IQVLQQQADDAEERAERLQR                                   | +3     | 4.130 | 0.508 | 1.0000      | 2       |   |        |
| LQREVEGERR                                             | +3     | 3.111 | 0.300 | 0.9988      | 18      |   |        |
| AREQAEAEVASLNRR                                        | +3     | 4.453 | 0.354 | 1.0000      | 22      |   |        |
| MASCOT:(PepMatched Observed.Hits Coverage)             |        |       |       |             | 3       | 3 | 11.46% |

Identified Human Platelet Proteins

| Seq             | Charge | ObservedMS | ExpectedMS | CalculatedMS | Pepscore | PepHits |
|-----------------|--------|------------|------------|--------------|----------|---------|
| EQAEAEVASLNR    | +2     | 658.83     | 1315.64    | 1315.64      | 0        | 54      |
| IQVLQQQADDAEER  | +2     | 821.91     | 1641.80    | 1641.80      | 0        | 99      |
| KIQVLQQQADDAEER | +2     | 885.96     | 1769.90    | 1769.89      | 0.01     | 98      |

No. 214. Protein IPI00191728 Matched (SEQUEST MASCOT) Y Y emPAI 0.44 Strategy.Hits 3 PepMatched (SEQUEST MASCOT) 6 SpectraMatched (SEQUEST MASCOT) 7

\*Des:

Calreticulin precursor

SEQUEST:(PepMatched Observed.Hits Coverage) 6 8 30.96%

| Seq                           | Charge | Xcor  | Delta | Proability | PepHits |
|-------------------------------|--------|-------|-------|------------|---------|
| IDDPTDSKPEDWDKPEHIPDPAK       | +3     |       |       | 3.544      | 0.410   |
| GQTLVVQFTVK                   | +2     | 3.298 |       | 0.472      | 0.9998  |
| KPEDWDEEMDGEWEPPIQNPEYK       | +3     |       |       | 5.409      | 0.570   |
| IDNSQVESGSLEDDWDFLPPKK        | +3     |       |       | 3.941      | 0.396   |
| SGTIFDNFLITNDEAYAEFFGNETWGVTK | +3     |       |       | 5.406      | 0.595   |
| IKDPDAAKPEDWDER               | +2     |       |       | 4.004      | 0.503   |

MASCOT:(PepMatched Observed.Hits Coverage) 7 6 27.42%

| Seq                       | Charge | ObservedMS | ExpectedMS | CalculatedMS | Pepscore | PepHits |
|---------------------------|--------|------------|------------|--------------|----------|---------|
| IKDPDAAKPEDWDER           | +2     | 892.93     | 1783.85    | 1783.84      | 0.01     | 42      |
| IDDPTDSKPEDWDKPEHIPDPAK   | +3     |            | 920.77     | 2759.28      | 2759.26  | 0.02    |
| AKIDDPTDSKPEDWDKPEHIPDPAK | +3     |            | 987.14     | 2958.39      | 2958.39  | 0       |
| GQTLVVQFTVK               | +2     | 610.36     | 1218.70    | 1218.70      | 0        | 67      |
| EQFLDGDWNTNR              | +2     | 726.33     | 1450.65    | 1450.65      | 0        | 50      |
| IDNSQVESGSLEDDWDFLPPKK    | +3     |            | 840.40     | 2518.19      | 2518.19  | 0       |
| KPEDWDEEMDGEWEPPIQNPEYK   | +3     |            | 987.44     | 2959.30      | 2959.29  | 0.01    |

No. 215. Protein IPI00210945 Matched (SEQUEST MASCOT) N Y emPAI 0.68 Strategy.Hits 1 PepMatched (SEQUEST MASCOT) 0 SpectraMatched (SEQUEST MASCOT) 4

\*Des:

Hepatoma alpha tropomyosin; NCBI gi: 207353

SEQUEST:(PepMatched Observed.Hits Coverage)

MASCOT:(PepMatched Observed.Hits Coverage) 4 1 11.07%

| Seq         | Charge | ObservedMS | ExpectedMS | CalculatedMS | Pepscore | PepHits |
|-------------|--------|------------|------------|--------------|----------|---------|
| LVIIESDLER  | +2     | 593.84     | 1185.67    | 1185.66      | 0.01     | 62      |
| KLVIIESDLER | +2     | 657.89     | 1313.76    | 1313.76      | 0        | 81      |
| AELSEGQVR   | +2     | 494.76     | 987.50     | 987.50       | 0        | 42      |
| MEIQEIQLK   | +2     | 566.31     | 1130.61    | 1130.60      | 0.01     | 53      |

No. 216. Protein IPI00210947 Matched (SEQUEST MASCOT) N Y emPAI 0.46 Strategy.Hits 1 PepMatched (SEQUEST MASCOT) 0 SpectraMatched (SEQUEST MASCOT) 3

\*Des:

Heparin cofactor II precursor

SEQUEST:(PepMatched Observed.Hits Coverage)

MASCOT:(PepMatched Observed.Hits Coverage) 3 1 8.82%

| Seq              | Charge | ObservedMS | ExpectedMS | CalculatedMS | Pepscore | PepHits |
|------------------|--------|------------|------------|--------------|----------|---------|
| TLEAQLTPQVVER    | +2     | 742.41     | 1482.81    | 1482.80      | 0.01     | 76      |
| YEVTTIHNLFR      | +2     | 696.87     | 1391.72    | 1391.72      | 0        | 44      |
| NFGYTLQSVNDLYIQK | +2     |            | 951.99     | 1901.96      | 1901.95  | 0.01    |

**Identified Human Platelet Proteins**

| No.   | Protein                                                           | Matched (SEQUEST MASCOT) | emPAI      | Strategy.Hits | PepMatched(SEQUEST MASCOT) | SpectraMatched(SEQUEST MASCOT) |
|-------|-------------------------------------------------------------------|--------------------------|------------|---------------|----------------------------|--------------------------------|
| 217.  | IPI00555252                                                       | N Y                      | 0.4        | 1             | 0                          | 4 0 96                         |
| *Des: | Glyceraldehyde-3-phosphate dehydrogenase                          |                          |            |               |                            |                                |
|       | SEQUEST:(PepMatched Observed.Hits Coverage)                       |                          |            |               |                            |                                |
|       | MASCOT:(PepMatched Observed.Hits Coverage)                        |                          |            |               |                            |                                |
|       | Seq                                                               | Charge                   | ObservedMS | ExpectedMS    | CalculatedMS               | PepScore PepHits               |
|       | GAAQNIIPASTGAAK                                                   | +2                       | 685.38     | 1368.74       | 1368.74                    | 0 64 22                        |
|       | GVVNGFGR                                                          | +2                       | 403.71     | 805.41        | 804.42                     | 0.99 47 10                     |
|       | VVDLMAYMASK                                                       | +2                       | 614.31     | 1226.61       | 1226.60                    | 0.01 68 30                     |
|       | VIHDNFGIVEGLMTTVHAITATQK                                          | +3                       | 865.79     | 2594.35       | 2594.35                    | 0 70 8                         |
| 218.  | IPI00191587                                                       | Y Y                      | 0.91       | 1             | 2                          | 4 4 7                          |
| *Des: | LOC500282 protein                                                 |                          |            |               |                            |                                |
|       | SEQUEST:(PepMatched Observed.Hits Coverage)                       |                          |            |               |                            |                                |
|       | Seq                                                               | Charge                   | Xcor       | Delta         | Probability                | PepHits                        |
|       | DLPNALDEKQLIEK                                                    | +2                       | 4.043      | 0.648         | 0.9961                     | 2                              |
|       | NELHNLLDKPQLQGIPVLVLGNKR                                          | +3                       | 6.126      | 0.816         | 1.0000                     | 4                              |
|       | MASCOT:(PepMatched Observed.Hits Coverage)                        |                          |            |               |                            |                                |
|       | Seq                                                               | Charge                   | ObservedMS | ExpectedMS    | CalculatedMS               | PepScore PepHits               |
|       | MNLSAIQDR                                                         | +2                       | 524.27     | 1046.52       | 1046.52                    | 0 41 2                         |
|       | IWDIGGQPR                                                         | +2                       | 521.28     | 1040.54       | 1040.54                    | 0 44 1                         |
|       | DLPNALDEKQLIEK                                                    | +2                       | 813.44     | 1624.87       | 1624.87                    | 0 70 2                         |
|       | NELHNLLDKPQLQGIPVLVLGNKR                                          | +3                       | 903.52     | 2707.54       | 2707.55                    | 0 69 2                         |
| 219.  | IPI00391812                                                       | N Y                      | 0.46       | 1             | 0                          | 3 0 7                          |
| *Des: | 57 kDa protein                                                    |                          |            |               |                            |                                |
|       | SEQUEST:(PepMatched Observed.Hits Coverage)                       |                          |            |               |                            |                                |
|       | MASCOT:(PepMatched Observed.Hits Coverage)                        |                          |            |               |                            |                                |
|       | Seq                                                               | Charge                   | ObservedMS | ExpectedMS    | CalculatedMS               | PepScore PepHits               |
|       | GTTLNPDSEIAR                                                      | +2                       | 637.32     | 1272.63       | 1272.63                    | 0 45 9                         |
|       | RPTSASSSPTETVYSVVK                                                | +2                       | 948.49     | 1894.97       | 1894.96                    | 0.01 51 1                      |
|       | WLFNSQSLQLTDR                                                     | +2                       | 804.42     | 1606.82       | 1606.81                    | 0.01 50 3                      |
| 220.  | IPI00555182                                                       | Y Y                      | 0.91       | 1             | 2                          | 3 2 3                          |
| *Des: | Splice Isoform 1 of Adaptin ear-binding coat-associated protein 2 |                          |            |               |                            |                                |
|       | SEQUEST:(PepMatched Observed.Hits Coverage)                       |                          |            |               |                            |                                |
|       | Seq                                                               | Charge                   | Xcor       | Delta         | Probability                | PepHits                        |
|       | ASEWQLDQPSWGR                                                     | +2                       | 3.339      | 0.333         | 0.9948                     | 1                              |
|       | TSGELFAQAPVDQFPGTAVESVTDSSR                                       | +3                       | 4.812      | 0.513         | 0.9999                     | 1                              |
|       | MASCOT:(PepMatched Observed.Hits Coverage)                        |                          |            |               |                            |                                |
|       | Seq                                                               | Charge                   | ObservedMS | ExpectedMS    | CalculatedMS               | PepScore PepHits               |
|       | ASEWQLDQPSWGR                                                     | +2                       | 823.89     | 1645.76       | 1645.75                    | 0.01 43 1                      |
|       | AFIGIGFGDR                                                        | +2                       | 526.78     | 1051.54       | 1051.54                    | 0 44 3                         |
|       | TSGELFAQAPVDQFPGTAVESVTDSSR                                       | +3                       | 932.79     | 2795.34       | 2795.32                    | 0.02 61 1                      |



Identified Human Platelet Proteins

|          |                                                       |                          |            |               |                            |                                |      |    |   |          |         |  |
|----------|-------------------------------------------------------|--------------------------|------------|---------------|----------------------------|--------------------------------|------|----|---|----------|---------|--|
| No. 221. | Protein                                               | Matched (SEQUEST MASCOT) | emPAI      | Strategy.Hits | PepMatched(SEQUEST MASCOT) | SpectraMatched(SEQUEST MASCOT) |      |    |   |          |         |  |
|          | IPI00558598                                           | N                        | Y          | 0.2           | 1                          | 0                              | 2    | 0  | 6 |          |         |  |
| *Des:    | 27 kDa protein                                        |                          |            |               |                            |                                |      |    |   |          |         |  |
|          | SEQUEST:(PepMatched Observed.Hits Coverage)           |                          |            |               |                            |                                |      |    |   |          |         |  |
|          | MASCOT:(PepMatched Observed.Hits Coverage)            |                          |            |               |                            |                                |      |    |   |          |         |  |
|          | Seq                                                   | Charge                   | ObservedMS | ExpectedMS    | CalculatedMS               |                                |      |    |   | PepScore | PepHits |  |
|          | DLADELALVDVIEDK                                       | +2                       | 829.4480   | 1656.8814     | 1656.8457                  | 0.04                           | 82   | 2  |   |          |         |  |
|          | LVIIITAGAR                                            | +2                       | 457.3027   | 912.5909      | 912.5756                   | 0.02                           | 56   | 4  |   |          |         |  |
| No. 222. | Protein                                               | Matched (SEQUEST MASCOT) | emPAI      | Strategy.Hits | PepMatched(SEQUEST MASCOT) | SpectraMatched(SEQUEST MASCOT) |      |    |   |          |         |  |
|          | IPI00421528                                           | N                        | Y          | 0.34          | 1                          | 0                              | 4    | 0  | 9 |          |         |  |
| *Des:    | Proteasome (Prosome, macropain) 26S subunit, ATPase 3 |                          |            |               |                            |                                |      |    |   |          |         |  |
|          | SEQUEST:(PepMatched Observed.Hits Coverage)           |                          |            |               |                            |                                |      |    |   |          |         |  |
|          | MASCOT:(PepMatched Observed.Hits Coverage)            |                          |            |               |                            |                                |      |    |   |          |         |  |
|          | Seq                                                   | Charge                   | ObservedMS | ExpectedMS    | CalculatedMS               |                                |      |    |   | PepScore | PepHits |  |
|          | MSTEEIVQR                                             | +2                       | 546.77     | 1091.53       | 1091.53                    | 0                              | 50   | 2  |   |          |         |  |
|          | MNVSPDVNYEELAR                                        | +2                       | 818.89     | 1635.76       | 1635.76                    | 0                              | 69   | 2  |   |          |         |  |
|          | VDILDPALLR                                            | +2                       | 562.84     | 1123.66       | 1123.66                    | 0                              | 43   | 3  |   |          |         |  |
|          | QTYFLPVIGLVDAEK                                       | +2                       | 846.96     | 1691.91       | 1691.91                    | 0                              | 50   | 4  |   |          |         |  |
| No. 223. | Protein                                               | Matched (SEQUEST MASCOT) | emPAI      | Strategy.Hits | PepMatched(SEQUEST MASCOT) | SpectraMatched(SEQUEST MASCOT) |      |    |   |          |         |  |
|          | IPI00555185                                           | N                        | Y          | 0.47          | 1                          | 0                              | 2    | 0  | 2 |          |         |  |
| *Des:    | RAB10, member RAS oncogene family                     |                          |            |               |                            |                                |      |    |   |          |         |  |
|          | SEQUEST:(PepMatched Observed.Hits Coverage)           |                          |            |               |                            |                                |      |    |   |          |         |  |
|          | MASCOT:(PepMatched Observed.Hits Coverage)            |                          |            |               |                            |                                |      |    |   |          |         |  |
|          | Seq                                                   | Charge                   | ObservedMS | ExpectedMS    | CalculatedMS               |                                |      |    |   | PepScore | PepHits |  |
|          | AFLTAEIDILR                                           | +2                       | 631.4083   | 1260.8020     | 1260.7077                  | 0.09                           | 50   | 1  |   |          |         |  |
|          | TPVKEPNSENVDISSGGVGTGWK                               | +3                       |            | 786.7799      | 2357.3179                  | 2357.1498                      | 0.17 | 50 | 1 |          |         |  |
| No. 224. | Protein                                               | Matched (SEQUEST MASCOT) | emPAI      | Strategy.Hits | PepMatched(SEQUEST MASCOT) | SpectraMatched(SEQUEST MASCOT) |      |    |   |          |         |  |
|          | IPI00387868                                           | Y                        | Y          | 0.09          | 2                          | 2                              | 2    | 3  | 3 |          |         |  |
| *Des:    | Ischemia responsive 94 kDa protein                    |                          |            |               |                            |                                |      |    |   |          |         |  |
|          | SEQUEST:(PepMatched Observed.Hits Coverage)           |                          |            |               |                            |                                |      |    |   |          |         |  |
|          | Seq                                                   | Charge                   | Xcor       | Delta         | Probability                | PepHits                        |      |    |   |          |         |  |
|          | SNLAYDIVQLPTGLTGIK                                    | +2                       |            | 4.532         | 0.499                      | 0.9999                         | 2    |    |   |          |         |  |
|          | EFSITDVVPYPISLR                                       | +2                       | 3.039      | 0.422         | 0.9986                     | 1                              |      |    |   |          |         |  |
|          | MASCOT:(PepMatched Observed.Hits Coverage)            |                          |            |               |                            |                                |      |    |   |          |         |  |
|          | Seq                                                   | Charge                   | ObservedMS | ExpectedMS    | CalculatedMS               |                                |      |    |   | PepScore | PepHits |  |
|          | ELSTTLNADEAVTR                                        | +2                       | 760.3886   | 1518.7625     | 1518.7525                  | 0.01                           | 85   | 2  |   |          |         |  |
|          | VLATAFDTTLGGR                                         | +2                       | 661.3648   | 1320.7151     | 1320.7037                  | 0.01                           | 66   | 1  |   |          |         |  |
| No. 225. | Protein                                               | Matched (SEQUEST MASCOT) | emPAI      | Strategy.Hits | PepMatched(SEQUEST MASCOT) | SpectraMatched(SEQUEST MASCOT) |      |    |   |          |         |  |
|          | IPI00358720                                           | N                        | Y          | 0.35          | 1                          | 0                              | 2    | 0  | 3 |          |         |  |
| *Des:    | PREDICTED: similar to GLI pathogenesis-related 2      |                          |            |               |                            |                                |      |    |   |          |         |  |
|          | SEQUEST:(PepMatched Observed.Hits Coverage)           |                          |            |               |                            |                                |      |    |   |          |         |  |
|          | MASCOT:(PepMatched Observed.Hits Coverage)            |                          |            |               |                            |                                |      |    |   |          |         |  |
|          |                                                       |                          |            |               |                            |                                |      |    |   |          |         |  |

Identified Human Platelet Proteins

| Seq               | Charge | ObservedMS | ExpectedMS | CalculatedMS | Pepscore | PepHits |
|-------------------|--------|------------|------------|--------------|----------|---------|
| ASASDGSSFVVAR     | +2     | 627.31     | 1252.61    | 1252.60      | 0.01     | 55      |
| KLNQEAQQYSEALASTR | +2     | 968.99     | 1935.98    | 1935.96      | 0.02     | 115     |

No. 226. Protein IPI00464645 Matched (SEQUEST MASCOT) N Y emPAI 0.34 Strategy.Hits 1 PepMatched(SEQUEST MASCOT) 0 SpectraMatched(SEQUEST MASCOT) 5 0 16

\*Des: Pyruvate dehydrogenase (Lipoamide) beta  
 SEQUEST:(PepMatched Observed.Hits Coverage) 5 1 21.91%  
 MASCOT:(PepMatched Observed.Hits Coverage)

| Seq              | Charge | ObservedMS | ExpectedMS | CalculatedMS | Pepscore | PepHits |
|------------------|--------|------------|------------|--------------|----------|---------|
| EAINQGMDEELERDEK | +2     | 953.44     | 1904.86    | 1904.84      | 0.02     | 54      |
| ILEDNSIPQVK      | +2     | 628.35     | 1254.68    | 1254.68      | 0        | 57      |
| VFLLGEEVAQYDGAYK | +3     | 601.64     | 1801.90    | 1800.89      | 1.01     | 55      |
| TIRPMDIEAIEASVMK | +2     | 902.48     | 1802.94    | 1802.93      | 0.01     | 62      |
| TYYMSAGLQPPIVFR  | +2     | 921.49     | 1840.97    | 1840.95      | 0.02     | 85      |

No. 227. Protein IPI00390946 Matched (SEQUEST MASCOT) Y N emPAI 0.3 Strategy.Hits 3 PepMatched(SEQUEST MASCOT) 3 SpectraMatched(SEQUEST MASCOT) 0 5 0

\*Des: PREDICTED: similar to Alpha enolase (2-phospho-D-glycerate hydro-lyase) (Non-neural enolase) (NNE) (Enolase 1)  
 SEQUEST:(PepMatched Observed.Hits Coverage) 3 6 13.27%

| Seq                      | Charge | Xcor  | Delta | Proability | PepHits |
|--------------------------|--------|-------|-------|------------|---------|
| LNVVEQEKIDQLMIEMDGTENKSK | +3     | 3.683 | 0.473 | 1.0000     | 1       |
| YNQILRIEEELGSKAK         | +3     | 3.943 | 0.387 | 1.0000     | 2       |
| VNQIGSVTESLQACK          | +2     | 2.913 | 0.461 | 0.9997     | 13      |

MASCOT:(PepMatched Observed.Hits Coverage)

No. 228. Protein IPI00368347 Matched (SEQUEST MASCOT) Y Y emPAI 0.78 Strategy.Hits 3 PepMatched(SEQUEST MASCOT) 21 SpectraMatched(SEQUEST MASCOT) 21 42 40

\*Des: Hypothetical LOC314432  
 SEQUEST:(PepMatched Observed.Hits Coverage) 21 3 36.24%

| Seq                      | Charge | Xcor  | Delta | Proability | PepHits |
|--------------------------|--------|-------|-------|------------|---------|
| QMNPYIQVTSHQNR           | +2     | 3.183 | 0.384 | 0.9983     | 4       |
| QPAENVNQYLTDISK          | +2     | 2.786 | 0.522 | 0.9996     | 2       |
| SPPAVQQDNVDEDLIR         | +2     | 5.469 | 0.657 | 1.0000     | 3       |
| LDQPMTEIVSR              | +2     | 3.869 | 0.483 | 0.9999     | 3       |
| IHVSDQELQSANASVDDSRLEELK | +3     | 6.293 | 0.620 | 1.0000     | 2       |
| YDQVAVFGSDLQEK           | +2     | 5.524 | 0.584 | 1.0000     | 1       |
| FEVQGLQPNGEEMTLK         | +2     | 4.445 | 0.519 | 1.0000     | 2       |
| HQYYNQEWTLWDR            | +2     | 4.667 | 0.572 | 1.0000     | 4       |
| NEEDATELVTLAQAVNAR       | +3     | 4.633 | 0.369 | 0.9998     | 1       |
| QLLHNFPDQLTSSGAPFWSGPK   | +3     | 3.377 | 0.387 | 0.9992     | 2       |
| NFPNAIEHTLQWAR           | +2     | 3.329 | 0.439 | 0.9994     | 2       |
| LAGTQPLEVLEAVQR          | +2     | 3.740 | 0.465 | 0.9998     | 2       |
| AVTLHDQGTQWADLSSQFYLR    | +2     | 5.857 | 0.625 | 1.0000     | 3       |
| AAVASLLQSVQVPEFTPK       | +2     | 3.983 | 0.520 | 0.9999     | 2       |
| SLPASLAEPDFVMTDFAK       | +2     | 3.562 | 0.529 | 0.9999     | 1       |
| GNVQVVIPFLTESYSSSQDPPEK  | +2     | 4.238 | 0.570 | 1.0000     | 3       |

Identified Human Platelet Proteins

| Seq                         | Charge | ObservedMS | ExpectedMS | CalculatedMS | Pepscore | PepHits |
|-----------------------------|--------|------------|------------|--------------|----------|---------|
| IYDDFFQNL DGVANALDNVDAR     | +2     | 803.89     | 1605.77    | 1605.76      | 0.01     | 44      |
| LAYVAAGDLAPINAFI GLAAQEV MK | +2     | 858.42     | 1714.83    | 1714.82      | 0.01     | 51      |
| NGFLNLALPFFGFSEPLA APR +2   |        | 691.00     | 2069.98    | 2069.96      | 0.02     | 43      |
| TEHKLEITMLSQGVSM LYSFFMPAAK | +3     | 644.83     | 1287.65    | 1287.65      | 0        | 74      |
| IHVSDQELQSANASVDDSR         | +2     | 778.84     | 1555.67    | 1554.68      | 0.99     | 73      |
| SPPAVQQDNVDEDLIR            | +2     | 898.45     | 1794.89    | 1794.87      | 0.02     | 113     |
| IHVSDQELQSANASVDDSRLEELK    | +3     | 828.40     | 895.12     | 2682.33      | 2682.31  | 0.02    |
| YDGQVAVFGSDLQEK             | +2     | 910.45     | 1818.89    | 1818.88      | 0.01     | 84      |
| FEVQGLQPNGEEMTLK            | +2     | 812.46     | 1622.90    | 1622.90      | 0        | 81      |
| LAGTQPLEVLEAVQR             | +2     | 848.94     | 1695.86    | 1695.85      | 0.01     | 47      |
| NFPNAIEHTLQWAR              | +2     | 919.92     | 1837.83    | 1837.82      | 0.01     | 81      |
| HQYYNQEWTLWDR               | +2     | 943.03     | 1884.04    | 1884.04      | 0        | 61      |
| AAVASLLQSVQVPEFTPK          | +2     | 969.98     | 1937.94    | 1937.94      | 0        | 56      |
| SLPASLAEPDFVMTDFAK          | +2     | 648.66     | 1942.97    | 1942.96      | 0.01     | 62      |
| NEEDATELVTLAQAVNAR          | +3     | 846.42     | 846.42     | 2536.25      | 2536.23  | 0.02    |
| AVTLHDQGTQWADLSSQFYLR       | +3     | 760.08     | 2277.20    | 2277.19      | 0.01     | 41      |
| NGFLNLALPFFGFSEPLA APR +3   |        | 841.09     | 2520.24    | 2520.24      | 0        | 41      |
| GNVQVVIPFLTESYSSSQDPPEK     | +3     | 867.41     | 2599.19    | 2599.18      | 0.01     | 82      |
| IYDDFFQNL DGVANALDNVDAR     | +3     | 868.47     | 2602.39    | 2602.38      | 0.01     | 84      |
| LAYVAAGDLAPINAFI GLAAQEV MK | +3     | 987.17     | 2958.50    | 2958.47      | 0.03     | 63      |
| TEHKLEITMLSQGVSM LYSFFMPAAK | +3     |            |            |              |          | 2       |

| No.   | Protein                                     | Matched (SEQUEST MASCOT) | emPAI      | Strategy.Hits | PepMatched (SEQUEST MASCOT) | SpectraMatched (SEQUEST MASCOT) |
|-------|---------------------------------------------|--------------------------|------------|---------------|-----------------------------|---------------------------------|
| 229.  | IPI00198417                                 | Y Y                      | 0.26       | 2             | 10 8                        | 23 16                           |
| *Des: | PREDICTED: similar to FYN binding protein   |                          |            |               |                             |                                 |
|       | SEQUEST:(PepMatched Observed.Hits Coverage) |                          |            | 10            | 5                           | 14.83%                          |
|       | Seq                                         | Charge                   | Xcor       | Delta         | Proability                  | PepHits                         |
|       | VAGQNSPSGIQSK                               | +2                       | 3.281      | 0.491         | 0.9996                      | 4                               |
|       | LHNLNQESDLK                                 | +2                       | 3.264      | 0.264         | 0.9933                      | 1                               |
|       | FGTQPNSVSRDPEVK                             | +3                       | 3.132      | 0.401         | 0.9998                      | 3                               |
|       | FMPAPQDADSKPR                               | +2                       | 2.997      | 0.597         | 1.0000                      | 4                               |
|       | LNQEEPAPFPK                                 | +2                       | 3.074      | 0.315         | 0.9796                      | 4                               |
|       | NLFDNQGNASPPAGPSNMSK                        | +2                       | 5.342      | 0.660         | 1.0000                      | 2                               |
|       | VGFLKPVSPKPTSLTK                            | +3                       | 3.548      | 0.405         | 1.0000                      | 7                               |
|       | FGTTKPLAAKPTYEEK                            | +3                       | 3.451      | 0.389         | 0.9999                      | 5                               |
|       | LTGPIQVIHAK                                 | +2                       | 2.935      | 0.388         | 0.9975                      | 3                               |
|       | KNLFDNQGNASPPAGPSNMSK                       | +2                       | 5.689      | 0.650         | 1.0000                      | 2                               |
|       | MASCOT:(PepMatched Observed.Hits Coverage)  |                          |            | 8             | 2                           | 11.61%                          |
|       | Seq                                         | Charge                   | ObservedMS | ExpectedMS    | CalculatedMS                | Pepscore                        |
|       | VAGQNSPSGIQSK                               | +2                       | 636.8347   | 1271.6549     | 1271.6469                   | 0.01                            |
|       |                                             |                          |            |               |                             | 74                              |
|       |                                             |                          |            |               |                             | 4                               |

Identified Human Platelet Proteins

|                       |    |           |           |           |      |    |   |  |
|-----------------------|----|-----------|-----------|-----------|------|----|---|--|
| LHNLNQESDLK           | +2 | 655.8451  | 1309.6756 | 1309.6626 | 0.01 | 47 | 1 |  |
| FGTQPNSVSRDPEVK       | +2 | 830.9252  | 1659.8359 | 1659.8216 | 0.01 | 44 | 3 |  |
| LNQEEPAPFPK           | +2 | 664.8571  | 1327.6996 | 1327.6884 | 0.01 | 58 | 3 |  |
| FMPAPQDADSKPR         | +2 | 730.3597  | 1458.7048 | 1458.6925 | 0.01 | 60 | 5 |  |
| NLFDNQGNASPPAGPSNMSK  | +2 | 1023.4807 | 2044.9468 | 2044.9272 | 0.02 | 99 | 2 |  |
| FGTTKPLAAKPTYEEK      | +2 | 939.5112  | 1877.0079 | 1876.9934 | 0.01 | 55 | 4 |  |
| KNLFDNQGNASPPAGPSNMSK | +2 | 1087.5299 | 2173.0453 | 2173.0221 | 0.02 | 96 | 2 |  |

No. 230. Protein IPI00197616 Matched (SEQUEST MASCOT) Y Y emPAI Strategy.Hits 1.23 5 PepMatched(SEQUEST MASCOT) 23 20 SpectraMatched(SEQUEST MASCOT) 129 144

\*Des:

CAP, adenylate cyclase-associated protein 1

SEQUEST:(PepMatched Observed.Hits Coverage)

| Seq                                 | Charge | Xcor  | Delta | Proability | PepHits |       |        |    |
|-------------------------------------|--------|-------|-------|------------|---------|-------|--------|----|
| GAVPYVQAFDSSLANPVAEYLK              |        |       |       | +2         | 6.390   | 0.645 | 1.0000 | 13 |
| LSDLLAPISEIQIEVITFR                 |        |       |       | +2         | 6.227   | 0.696 | 1.0000 | 16 |
| TDGCHAYLSK                          | +2     | 3.170 | 0.394 | 0.9990     | 2       |       |        |    |
| INSITVDNCK                          | +2     | 3.000 | 0.310 | 0.9954     | 5       |       |        |    |
| NSLDCEIVSAK                         | +2     | 3.914 | 0.529 | 1.0000     | 8       |       |        |    |
| SSEMNVLIPTTEGGDFNEFPVPEQFK          |        |       |       | +2         | 5.048   | 0.581 | 1.0000 | 4  |
| VENQENVSNLVIDDELK                   |        |       |       | +2         | 4.180   | 0.500 | 1.0000 | 1  |
| KLGLVFDDVVGIVEIINSR                 |        |       |       | +2         | 6.489   | 0.599 | 1.0000 | 33 |
| GKINSITVDNCK                        | +2     | 3.629 | 0.428 | 0.9980     | 2       |       |        |    |
| ALLVTASQCQQPAGNK                    |        |       |       | +2         | 5.305   | 0.529 | 1.0000 | 16 |
| GKINSITVDNCKK                       | +3     | 4.280 | 0.502 | 1.0000     | 5       |       |        |    |
| KEPALLELEGKK                        | +3     | 4.762 | 0.398 | 1.0000     | 14      |       |        |    |
| ALLVTASQCQQPAGNKLSDLLAPISEIQIEVITFR |        |       |       | +3         | 6.400   | 0.616 | 1.0000 | 4  |
| AVGRLEAVSHTSDMHCYGDSPSK             |        |       |       | +3         | 5.152   | 0.658 | 1.0000 | 7  |
| SALFAQINQGESITHALK                  |        |       |       | +2         | 5.249   | 0.476 | 1.0000 | 12 |
| AYLSIWTELQAYIK                      | +2     | 4.239 | 0.497 | 1.0000     | 1       |       |        |    |
| PQTSPSPKPKATK                       | +2     | 3.461 | 0.435 | 0.9928     | 3       |       |        |    |
| HAEMVHTGLK                          | +2     | 2.668 | 0.567 | 0.9997     | 13      |       |        |    |
| VQVMGKVPTISINK                      | +2     | 4.542 | 0.433 | 1.0000     | 3       |       |        |    |
| VPTISINKTDGCHAYLSK                  |        |       |       | +2         | 4.491   | 0.599 | 1.0000 | 6  |
| HAEMVHTGLKLER                       | +3     | 4.320 | 0.586 | 1.0000     | 10      |       |        |    |
| EIGGDVQKHAEMVHTGLKLER               | +3     | 3.582 | 0.461 | 1.0000     | 2       |       |        |    |
| DVKVQVMGKVPTISINK                   |        |       |       | +2         | 4.472   | 0.576 | 1.0000 | 3  |

MASCOT:(PepMatched Observed.Hits Coverage)

| Seq                | Charge | ObservedMS | ExpectedMS | CalculatedMS |          | Pepscore  | PepHits   |      |     |    |
|--------------------|--------|------------|------------|--------------|----------|-----------|-----------|------|-----|----|
| INSITVDNCK         | +2     | 553.7825   | 1105.5505  | 1105.5437    | 0.01     | 78        | 14        |      |     |    |
| NSLDCEIVSAK        | +2     | 589.7939   | 1177.5733  | 1177.5649    | 0.01     | 68        | 28        |      |     |    |
| TDGCHAYLSK         | +2     | 547.7538   | 1093.4930  | 1093.4862    | 0.01     | 66        | 4         |      |     |    |
| ALLVTASQCQQPAGNK   |        |            |            | +2           | 814.9308 | 1627.8470 | 1627.8351 | 0.01 | 116 | 32 |
| AYLSIWTELQAYIK     | +2     | 849.9659   | 1697.9173  | 1697.9028    | 0.01     | 73        | 3         |      |     |    |
| LGLVFDDVVGIVEIINSR |        |            |            | +2           | 979.5610 | 1957.1074 | 1957.0883 | 0.02 | 116 | 29 |
| GKINSITVDNCK       | +2     | 646.3450   | 1290.6754  | 1290.6601    | 0.02     | 78        | 4         |      |     |    |
| KEPALLELEGKK       | +3     | 452.2725   | 1353.7957  | 1353.7867    | 0.01     | 67        | 32        |      |     |    |
| INSITVDNCKK        | +2     | 617.8348   | 1233.6550  | 1233.6387    | 0.02     | 47        | 2         |      |     |    |

Identified Human Platelet Proteins

|                                     |    |           |           |           |      |     |    |  |  |
|-------------------------------------|----|-----------|-----------|-----------|------|-----|----|--|--|
| GKINSITVDNCKK                       | +2 | 710.3913  | 1418.7680 | 1418.7551 | 0.01 | 68  | 6  |  |  |
| SALFAQINQGESITHALK                  | +2 | 964.5253  | 1927.0360 | 1927.0163 | 0.02 | 93  | 24 |  |  |
| KLGLVFDDVVGIVEIINSR                 | +2 | 1043.6118 | 2085.2091 | 2085.1833 | 0.03 | 125 | 4  |  |  |
| AVGRLEAVSHTSDMHCGYGDSPSK            | +3 | 835.3881  | 2503.1424 | 2503.1219 | 0.02 | 67  | 12 |  |  |
| HAEMVHTGLK                          | +2 | 561.7934  | 1121.5722 | 1121.5651 | 0.01 | 57  | 16 |  |  |
| VQVMGKVPTISINK                      | +2 | 757.4464  | 1512.8781 | 1512.8697 | 0.01 | 78  | 3  |  |  |
| VPTISINKTDGCHAYLSK                  | +2 | 974.0156  | 1946.0167 | 1945.9931 | 0.02 | 80  | 8  |  |  |
| ALLVTASQCQQPAGNKLSDLLAPISEIQIEVITFR | +3 | 1261.3523 | 3781.0351 | 3781.0083 | 0.03 | 91  | 16 |  |  |
| DVKVQVMGKVPTISINK                   | +2 | 928.5464  | 1855.0783 | 1855.0600 | 0.02 | 70  | 8  |  |  |
| HAEMVHTGLKLER                       | +2 | 760.9095  | 1519.8045 | 1519.7929 | 0.01 | 80  | 18 |  |  |
| EIGGDVQKHAEMVHTGLKLER               | +3 | 783.0837  | 2346.2292 | 2346.2113 | 0.02 | 52  | 2  |  |  |

No. 231. Protein IPI00471794 Matched (SEQUEST MASCOT) Y N emPAI 0.24 Strategy.Hits 1 PepMatched(SEQUEST MASCOT) 2 SpectraMatched(SEQUEST MASCOT) 0  
 \*Des: Hypothetical LOC304860  
 SEQUEST:(PepMatched Observed.Hits Coverage) 2 1 11.96%  
 Seq Charge Xcor Delta Probility PepHits  
 SLNFLSFPGLK +2 3.185 0.471 0.9994 1  
 ESQELAQHAAEIGADGIAVIAPFFFK +3 3.576 0.341 0.9961 1  
 MASCOT:(PepMatched Observed.Hits Coverage)

No. 232. Protein IPI00207003 Matched (SEQUEST MASCOT) Y N emPAI 0.13 Strategy.Hits 1 PepMatched(SEQUEST MASCOT) 3 SpectraMatched(SEQUEST MASCOT) 0  
 \*Des: Iron-responsive element binding protein 1  
 SEQUEST:(PepMatched Observed.Hits Coverage) 3 1 6.74%  
 Seq Charge Xcor Delta Probility PepHits  
 QAPQTVHLPSGETLDVFDAER +3 3.190 0.444 0.9995 1  
 FVEFFGPGVAQLSIADR +2 4.585 0.577 1.0000 1  
 VILQDFTGVPVAVVDFAMR +3 3.781 0.427 0.9874 2  
 MASCOT:(PepMatched Observed.Hits Coverage)

No. 233. Protein IPI00365944 Matched (SEQUEST MASCOT) Y N emPAI 1.25 Strategy.Hits 1 PepMatched(SEQUEST MASCOT) 6 SpectraMatched(SEQUEST MASCOT) 0  
 \*Des: PREDICTED: similar to myosin, light polypeptide 6, alkali, smooth muscle and non-muscle  
 SEQUEST:(PepMatched Observed.Hits Coverage) 6 1 58.44%  
 Seq Charge Xcor Delta Probility PepHits  
 ALGQNPTNAEVLK +2 3.977 0.581 0.9979 7  
 NKDQGTIEDYVEGLR +2 4.596 0.789 1.0000 4  
 ALGQNPTNAEVLKVLGNPK +2 5.341 0.762 1.0000 3  
 NKDQGTIEDYVEGLRVFDK +3 4.773 0.605 0.9997 1  
 VFDKEGNGTVMGAEIRHVLVTLGEK +3 4.907 0.691 1.0000 1  
 SDEMNVKVLDFEHFLPMLQTVAK +3 4.942 0.627 1.0000 3  
 MASCOT:(PepMatched Observed.Hits Coverage)

No. 234. Protein IPI00231207 Matched (SEQUEST MASCOT) N Y emPAI 0.31 Strategy.Hits 1 PepMatched(SEQUEST MASCOT) 0 SpectraMatched(SEQUEST MASCOT) 32  
 \*Des: Myosin light chain 3, skeletal muscle isoform

Identified Human Platelet Proteins

| No.   | Protein                                                  | Matched (SEQUEST MASCOT) | emPAI               | Strategy.Hits | PepMatched(SEQUEST MASCOT) | SpectraMatched(SEQUEST MASCOT) |
|-------|----------------------------------------------------------|--------------------------|---------------------|---------------|----------------------------|--------------------------------|
| 235.  | IPI00231134                                              | Y                        | Y                   | 0.73          | 1                          | 3                              |
| *Des: | Guanine nucleotide-binding protein beta subunit 2-like 1 |                          |                     |               |                            |                                |
|       | SEQUEST:(PepMatched Observed.Hits Coverage)              | 3                        | 1                   | 17.17%        |                            |                                |
|       | Seq Charge ObservedMS                                    | ExpectedMS               | CalculatedMS        | PepScore      | PepHits                    |                                |
|       | EGNGTVMGAELR +2                                          | 617.3065                 | 1232.5984 1232.5819 | 0.02          | 58                         | 8                              |
|       | VFDKEGNGTVMGAELR +2                                      | 861.9345                 | 1721.8545 1721.8406 | 0.01          | 75                         | 40                             |
|       | MASCOT:(PepMatched Observed.Hits Coverage)               | 5                        | 1                   | 24.23%        |                            |                                |
|       | Seq Charge ObservedMS                                    | ExpectedMS               | CalculatedMS        | PepScore      | PepHits                    |                                |
|       | VWQVTIGTR +2                                             | 530.30                   | 1058.59 1058.59     | 0             | 42                         | 1                              |
|       | DVLSVAFSSDNR +2                                          | 655.32                   | 1308.63 1308.63     | 0             | 50                         | 1                              |
|       | IIVDELKQEVISTSSK +2                                      | 895.01                   | 1788.00 1787.99     | 0.01          | 86                         | 3                              |
|       | GHNGWVTQIATTPQFPDMILSASR +3                              | 876.44                   | 2626.30 2626.30     | 0             | 42                         | 2                              |
|       | DGQAMLWDLNEGK +2                                         | 738.84                   | 1475.67 1475.67     | 0             | 67                         | 4                              |
| 236.  | IPI00195871                                              | Y                        | Y                   | 0.18          | 3                          | 4                              |
| *Des: | Splice Isoform LYN B of Tyrosine-protein kinase Lyn      |                          |                     |               |                            |                                |
|       | SEQUEST:(PepMatched Observed.Hits Coverage)              | 4                        | 3                   | 12.62%        |                            |                                |
|       | Seq Charge Xcor Delta                                    | Probility                | PepHits             |               |                            |                                |
|       | VLEEHGEWWK +2                                            | 2.848                    | 0.441               | 0.9994        | 1                          |                                |
|       | TNADVMTALSQGYR +2                                        | 3.213                    | 0.521               | 0.9998        | 1                          |                                |
|       | LIDFSAQIAEGMAYIER +2                                     | 3.441                    | 0.461               | 0.9997        | 1                          |                                |
|       | SDVWSFGILLYEIVTYGK +2                                    | 5.644                    | 0.677               | 1.0000        | 3                          |                                |
|       | MASCOT:(PepMatched Observed.Hits Coverage)               | 4                        | 2                   | 11.62%        |                            |                                |
|       | Seq Charge ObservedMS                                    | ExpectedMS               | CalculatedMS        | PepScore      | PepHits                    |                                |
|       | SLDNGGYYISPR +2                                          | 671.33                   | 1340.64 1340.64     | 0             | 55                         | 2                              |
|       | VLEEHGEWWK +2                                            | 656.82                   | 1311.63 1311.62     | 0.01          | 57                         | 2                              |
|       | TNADVMTALSQGYR +2                                        | 763.87                   | 1525.72 1525.72     | 0             | 69                         | 2                              |
|       | SDVWSFGILLYEIVTYGK +3                                    | 697.37                   | 2089.08 2089.08     | 0             | 44                         | 2                              |
| 237.  | IPI00362534                                              | N                        | Y                   | 0.1           | 1                          | 0                              |
| *Des: | PREDICTED: similar to RNA helicase                       |                          |                     |               |                            |                                |
|       | SEQUEST:(PepMatched Observed.Hits Coverage)              | 3                        | 1                   | 5.83%         |                            |                                |
|       | MASCOT:(PepMatched Observed.Hits Coverage)               | 3                        | 1                   | 5.83%         |                            |                                |
|       | Seq Charge ObservedMS                                    | ExpectedMS               | CalculatedMS        | PepScore      | PepHits                    |                                |
|       | VGNLGLATSFNER +2                                         | 762.90                   | 1523.78 1523.77     | 0.01          | 57                         | 2                              |
|       | HVINFDLPSDIEEYVHR +3                                     | 695.01                   | 2082.02 2082.02     | 0             | 73                         | 2                              |
|       | DLDDLLEAK +2                                             | 564.83                   | 1127.64 1127.64     | 0             | 50                         | 2                              |

Identified Human Platelet Proteins

|             |                                                                             |                               |               |                    |                                 |                                     |          |         |
|-------------|-----------------------------------------------------------------------------|-------------------------------|---------------|--------------------|---------------------------------|-------------------------------------|----------|---------|
| No.<br>238. | Protein<br>IPI00360930                                                      | Matched (SEQUEST MASCOT)<br>Y | emPAI<br>1.49 | Strategy.Hits<br>1 | PepMatched(SEQUEST MASCOT)<br>7 | SpectraMatched(SEQUEST MASCOT)<br>7 | 14       | 15      |
| *Des:       | PREDICTED: similar to Carbonic anhydrase I (Carbonate dehydratase I) (CA-I) |                               |               |                    |                                 |                                     |          |         |
|             | SEQUEST:(PepMatched Observed.Hits Coverage) 7 1 46.61%                      |                               |               |                    |                                 |                                     |          |         |
|             | Seq                                                                         | Charge                        | Xcor          | Delta              | Probility                       | PepHits                             |          |         |
|             | ADGLAIIGVLMK                                                                | +2                            |               | 4.443              | 0.469                           | 1.0000                              | 3        |         |
|             | HDSSLKPVSVPYNPATAK                                                          | +2                            |               | 4.203              | 0.573                           | 1.0000                              | 3        |         |
|             | VLDALSSVK                                                                   | +2                            |               | 2.716              | 0.370                           | 0.9985                              | 4        |         |
|             | LYPIANGNNQSPIDIK                                                            | +2                            |               | 4.840              | 0.456                           | 1.0000                              | 4        |         |
|             | GLLSSAEGEPAVPVLSNHRPPQPLK                                                   | +3                            |               | 5.254              | 0.588                           | 1.0000                              | 4        |         |
|             | EIVNVGHSFHVVFDSSNQSVLK                                                      | +3                            |               | 4.515              | 0.380                           | 0.9998                              | 3        |         |
|             | ESISLSPEQLAQLR                                                              | +2                            |               | 3.805              | 0.300                           | 0.9985                              | 1        |         |
|             | MASCOT:(PepMatched Observed.Hits Coverage) 7 1 46.61%                       |                               |               |                    |                                 |                                     |          |         |
|             | Seq                                                                         | Charge                        | ObservedMS    | ExpectedMS         | CalculatedMS                    |                                     | Pepscore | PepHits |
|             | HDSSLKPVSVPYNPATAK                                                          | +2                            | 951.00        | 1899.98            | 1899.97                         | 0.01                                | 78       | 4       |
|             | VLDALSSVK                                                                   | +2                            | 466.28        | 930.54             | 930.54                          | 0                                   | 50       | 3       |
|             | LYPIANGNNQSPIDIK                                                            | +2                            | 878.97        | 1755.93            | 1755.92                         | 0.01                                | 76       | 4       |
|             | GLLSSAEGEPAVPVLSNHRPPQPLK                                                   | +3                            | 865.15        | 2592.43            | 2592.40                         | 0.03                                | 63       | 2       |
|             | ESISLSPEQLAQLR                                                              | +2                            | 785.93        | 1569.85            | 1569.84                         | 0.01                                | 69       | 1       |
|             | EIVNVGHSFHVVFDSSNQSVLK                                                      | +3                            | 853.10        | 2556.28            | 2556.26                         | 0.02                                | 49       | 1       |
|             | ADGLAIIGVLMK                                                                | +2                            | 600.86        | 1199.70            | 1199.69                         | 0.01                                | 91       | 3       |
| No.<br>239. | Protein<br>IPI00231139                                                      | Matched (SEQUEST MASCOT)<br>Y | emPAI<br>0.16 | Strategy.Hits<br>3 | PepMatched(SEQUEST MASCOT)<br>5 | SpectraMatched(SEQUEST MASCOT)<br>7 | 12       | 15      |
| *Des:       | TranskeTolase                                                               |                               |               |                    |                                 |                                     |          |         |
|             | SEQUEST:(PepMatched Observed.Hits Coverage) 5 5 14.11%                      |                               |               |                    |                                 |                                     |          |         |
|             | Seq                                                                         | Charge                        | Xcor          | Delta              | Probility                       | PepHits                             |          |         |
|             | SVPMSTVFYPSDGVATEK                                                          | +2                            |               | 3.242              | 0.243                           | 0.9826                              | 1        |         |
|             | NMAEQIIQEIYSQVQSK                                                           | +3                            |               | 4.527              | 0.566                           | 1.0000                              | 3        |         |
|             | SKDDQVTVIGAGVTLHEALAAAEMLKK                                                 | +3                            |               | 7.737              | 0.622                           | 1.0000                              | 8        |         |
|             | MFIDKDAIVQAVK                                                               | +2                            |               | 3.817              | 0.537                           | 1.0000                              | 4        |         |
|             | KISSDLGHPVPK                                                                | +2                            |               | 3.403              | 0.450                           | 0.9995                              | 7        |         |
|             | MASCOT:(PepMatched Observed.Hits Coverage) 7 2 14.41%                       |                               |               |                    |                                 |                                     |          |         |
|             | Seq                                                                         | Charge                        | ObservedMS    | ExpectedMS         | CalculatedMS                    |                                     | Pepscore | PepHits |
|             | IIALDGDTK                                                                   | +2                            | 473.2688      | 944.5230           | 944.5178                        | 0.01                                | 41       | 2       |
|             | VGDKIATR                                                                    | +2                            | 430.2578      | 858.5011           | 858.4923                        | 0.01                                | 44       | 4       |
|             | LAVSQVPR                                                                    | +2                            | 435.2663      | 868.5181           | 868.5130                        | 0.01                                | 45       | 4       |
|             | MFIDKDAIVQAVK                                                               | +2                            | 767.9232      | 1533.8319          | 1533.8224                       | 0.01                                | 48       | 3       |
|             | LQALKDTANR                                                                  | +2                            | 565.3236      | 1128.6327          | 1128.6251                       | 0.01                                | 48       | 5       |
|             | SKDDQVTVIGAGVTLHEALAAAEMLKK                                                 | +3                            | 932.5128      | 2794.5166          | 2794.4898                       | 0.03                                | 93       | 3       |
|             | KISSDLGHPVPK                                                                | +2                            | 696.8830      | 1391.7514          | 1391.7408                       | 0.01                                | 86       | 4       |
| No.<br>240. | Protein<br>IPI00212622                                                      | Matched (SEQUEST MASCOT)<br>Y | emPAI<br>0.07 | Strategy.Hits<br>1 | PepMatched(SEQUEST MASCOT)<br>2 | SpectraMatched(SEQUEST MASCOT)<br>0 | 3        | 0       |
| *Des:       | Trifunctional enzyme alpha subunit, mitochondrial precursor                 |                               |               |                    |                                 |                                     |          |         |
|             | SEQUEST:(PepMatched Observed.Hits Coverage) 2 1 4.38%                       |                               |               |                    |                                 |                                     |          |         |

Identified Human Platelet Proteins

| Seq                                        | Charge                                                                | Xcor                     | Delta      | Probability   | PepHits                    |                                |          |         |
|--------------------------------------------|-----------------------------------------------------------------------|--------------------------|------------|---------------|----------------------------|--------------------------------|----------|---------|
| TGLEQGNDAAGYLAESEK                         |                                                                       |                          | +2         | 4.878         | 0.554                      | 1.0000                         | 2        |         |
| ADMVIEAVFEDLAVK                            |                                                                       |                          | +2         | 3.454         | 0.336                      | 0.9977                         | 1        |         |
| MASCOT:(PepMatched Observed.Hits Coverage) |                                                                       |                          |            |               |                            |                                |          |         |
| No.                                        | Protein                                                               | Matched (SEQUEST MASCOT) | emPAI      | Strategy.Hits | PepMatched(SEQUEST MASCOT) | SpectraMatched(SEQUEST MASCOT) |          |         |
| 241.                                       | IPI00205332                                                           | Y                        | Y          | 0.28          | 1                          | 6                              | 2        | 12 4    |
| *Des:                                      | Electron transfer flavoprotein alpha-subunit, mitochondrial precursor |                          |            |               |                            |                                |          |         |
|                                            | SEQUEST:(PepMatched Observed.Hits Coverage)                           |                          |            | 6             | 1                          | 36.87%                         |          |         |
|                                            | Seq                                                                   | Charge                   | Xcor       | Delta         | Probability                | PepHits                        |          |         |
|                                            | AAVDAGFVPNDMQVGQTGK                                                   |                          | +2         | 5.146         | 0.586                      | 1.0000                         | 2        |         |
|                                            | APSSSSAGISEWLDQK                                                      |                          | +2         | 4.888         | 0.457                      | 0.9998                         | 1        |         |
|                                            | GLLPEELTPLILETQK                                                      |                          | +2         | 3.632         | 0.495                      | 0.9996                         | 2        |         |
|                                            | TIVAINKDPEAPIFQVADYGIVADLFK                                           |                          | +3         | 6.024         | 0.600                      | 1.0000                         | 2        |         |
|                                            | IVAPELYIAVGISGAIQHLAGMK                                               |                          | +2         | 6.027         | 0.667                      | 1.0000                         | 8        |         |
|                                            | GTSFEAAAASGGSASSEK                                                    |                          | +2         | 4.929         | 0.592                      | 1.0000                         | 1        |         |
|                                            | MASCOT:(PepMatched Observed.Hits Coverage)                            |                          |            | 2             | 3                          | 12.97%                         |          |         |
|                                            | Seq                                                                   | Charge                   | ObservedMS | ExpectedMS    | CalculatedMS               |                                | PepScore | PepHits |
|                                            | AAVDAGFVPNDMQVGQTGK                                                   |                          | +2         | 952.97        | 1903.92                    | 1903.91                        | 0.01     | 55 2    |
|                                            | IVAPELYIAVGISGAIQHLAGMK                                               |                          | +3         | 784.12        | 2349.33                    | 2350.31                        | -0.97    | 44 2    |
| No.                                        | Protein                                                               | Matched (SEQUEST MASCOT) | emPAI      | Strategy.Hits | PepMatched(SEQUEST MASCOT) | SpectraMatched(SEQUEST MASCOT) |          |         |
| 242.                                       | IPI00389610                                                           | Y                        | N          | 0.25          | 1                          | 2                              | 0        | 4 0     |
| *Des:                                      | 55 kDa protein                                                        |                          |            |               |                            |                                |          |         |
|                                            | SEQUEST:(PepMatched Observed.Hits Coverage)                           |                          |            | 2             | 1                          | 4.77%                          |          |         |
|                                            | Seq                                                                   | Charge                   | Xcor       | Delta         | Probability                | PepHits                        |          |         |
|                                            | DNSTMGYMMAK                                                           |                          | +2         | 3.234         | 0.520                      | 0.9999                         | 2        |         |
|                                            | RAPFDLFENK                                                            |                          | +2         | 2.869         | 0.268                      | 0.9877                         | 4        |         |
|                                            | MASCOT:(PepMatched Observed.Hits Coverage)                            |                          |            |               |                            |                                |          |         |
| No.                                        | Protein                                                               | Matched (SEQUEST MASCOT) | emPAI      | Strategy.Hits | PepMatched(SEQUEST MASCOT) | SpectraMatched(SEQUEST MASCOT) |          |         |
| 243.                                       | IPI00370486                                                           | N                        | Y          | 0.42          | 1                          | 0                              | 2        | 0 20    |
| *Des:                                      | 25 kDa protein                                                        |                          |            |               |                            |                                |          |         |
|                                            | SEQUEST:(PepMatched Observed.Hits Coverage)                           |                          |            |               |                            |                                |          |         |
|                                            | MASCOT:(PepMatched Observed.Hits Coverage)                            |                          |            | 2             | 1                          | 14.34%                         |          |         |
|                                            | Seq                                                                   | Charge                   | ObservedMS | ExpectedMS    | CalculatedMS               |                                | PepScore | PepHits |
|                                            | ANGAPISQGVDTANPTK                                                     |                          | +2         | 821.42        | 1640.82                    | 1639.82                        | 1        | 91 10   |
|                                            | FSGSSSGTTATLTIR                                                       |                          | +2         | 743.39        | 1484.76                    | 1484.75                        | 0.01     | 89 10   |
| No.                                        | Protein                                                               | Matched (SEQUEST MASCOT) | emPAI      | Strategy.Hits | PepMatched(SEQUEST MASCOT) | SpectraMatched(SEQUEST MASCOT) |          |         |
| 244.                                       | IPI00361738                                                           | Y                        | N          | 0.28          | 1                          | 2                              | 0        | 2 0     |
| *Des:                                      | Hypothetical LOC317191                                                |                          |            |               |                            |                                |          |         |
|                                            | SEQUEST:(PepMatched Observed.Hits Coverage)                           |                          |            | 2             | 1                          | 9.65%                          |          |         |
|                                            | Seq                                                                   | Charge                   | Xcor       | Delta         | Probability                | PepHits                        |          |         |
|                                            | YVEEQPGYLQR                                                           |                          | +2         | 2.919         | 0.353                      | 0.9948                         | 2        |         |
|                                            | TPDLEHSVFLK                                                           |                          | +3         | 3.485         | 0.369                      | 0.9991                         | 1        |         |
|                                            | MASCOT:(PepMatched Observed.Hits Coverage)                            |                          |            |               |                            |                                |          |         |



Identified Human Platelet Proteins

|       |                                                                              |                          |            |               |                            |                                |       |          |         |
|-------|------------------------------------------------------------------------------|--------------------------|------------|---------------|----------------------------|--------------------------------|-------|----------|---------|
| No.   | Protein                                                                      | Matched (SEQUEST MASCOT) | emPAI      | Strategy.Hits | PepMatched(SEQUEST MASCOT) | SpectraMatched(SEQUEST MASCOT) |       |          |         |
| 245.  | IPI00421600                                                                  | Y Y                      | 0.17       | 1             | 2 2                        | 3                              | 2     |          |         |
| *Des: | 26S protease regulatory subunit 7                                            |                          |            |               |                            |                                |       |          |         |
|       | SEQUEST:(PepMatched Observed.Hits Coverage)                                  |                          |            | 2             | 1                          | 5.89%                          |       |          |         |
|       | Seq                                                                          | Charge                   | Xcor       | Delta         | Proability                 | PepHits                        |       |          |         |
|       | QTLQSEQPLQVAR                                                                | +2                       |            | 3.487         | 0.412                      | 0.9995                         | 1     |          |         |
|       | ALDEGDIALLK                                                                  | +2                       |            | 2.852         | 0.405                      | 0.9986                         | 2     |          |         |
|       | MASCOT:(PepMatched Observed.Hits Coverage)                                   |                          |            | 2             | 1                          | 5.89%                          |       |          |         |
|       | Seq                                                                          | Charge                   | ObservedMS | ExpectedMS    | CalculatedMS               |                                |       | Pepscore | PepHits |
|       | QTLQSEQPLQVAR                                                                | +2                       | 749.41     | 1496.80       | 1496.79                    | 0.01                           | 41    | 1        |         |
|       | ALDEGDIALLK                                                                  | +2                       | 579.33     | 1156.64       | 1156.63                    | 0.01                           | 44    | 2        |         |
| No.   | Protein                                                                      | Matched (SEQUEST MASCOT) | emPAI      | Strategy.Hits | PepMatched(SEQUEST MASCOT) | SpectraMatched(SEQUEST MASCOT) |       |          |         |
| 246.  | IPI00362395                                                                  | Y Y                      | 0.65       | 1             | 4 3                        | 6                              | 5     |          |         |
| *Des: | PREDICTED: similar to esterase D/formylglutathione hydrolase                 |                          |            |               |                            |                                |       |          |         |
|       | SEQUEST:(PepMatched Observed.Hits Coverage)                                  |                          |            | 4             | 1                          | 22.25%                         |       |          |         |
|       | Seq                                                                          | Charge                   | Xcor       | Delta         | Proability                 | PepHits                        |       |          |         |
|       | AFNGYLGPDQSK                                                                 | +2                       |            | 3.546         | 0.482                      | 0.9996                         | 3     |          |         |
|       | SYSGPQIDILIDQGK                                                              | +2                       |            | 3.446         | 0.513                      | 0.9996                         | 1     |          |         |
|       | MYSYVTEELPQLINANFPVDPQR                                                      |                          |            |               | +3                         | 4.124                          | 0.458 | 0.9997   | 1       |
|       | LQEGYDHSYYFIATFITDHIR                                                        |                          |            |               | +3                         | 5.811                          | 0.453 | 0.9999   | 2       |
|       | MASCOT:(PepMatched Observed.Hits Coverage)                                   |                          |            | 3             | 1                          | 15.13%                         |       |          |         |
|       | Seq                                                                          | Charge                   | ObservedMS | ExpectedMS    | CalculatedMS               |                                |       | Pepscore | PepHits |
|       | AFNGYLGPDQSK                                                                 | +2                       | 649.31     | 1296.61       | 1295.61                    | 1                              | 59    | 3        |         |
|       | SYSGPQIDILIDQGK                                                              | +2                       | 817.43     | 1632.84       | 1632.84                    | 0                              | 62    | 1        |         |
|       | LQEGYDHSYYFIATFITDHIR                                                        | +3                       |            | 863.76        | 2588.25                    | 2588.23                        | 0.02  | 53       | 1       |
| No.   | Protein                                                                      | Matched (SEQUEST MASCOT) | emPAI      | Strategy.Hits | PepMatched(SEQUEST MASCOT) | SpectraMatched(SEQUEST MASCOT) |       |          |         |
| 247.  | IPI00396906                                                                  | Y Y                      | 0.37       | 1             | 2 2                        | 3                              | 6     |          |         |
| *Des: | ATP synthase, H+ transporting, mitochondrial F1 complex, gamma polypeptide 1 |                          |            |               |                            |                                |       |          |         |
|       | SEQUEST:(PepMatched Observed.Hits Coverage)                                  |                          |            | 2             | 2                          | 8.58%                          |       |          |         |
|       | Seq                                                                          | Charge                   | Xcor       | Delta         | Proability                 | PepHits                        |       |          |         |
|       | VYGTGSLALYEK                                                                 | +2                       |            | 3.002         | 0.470                      | 0.9997                         | 2     |          |         |
|       | ELIEIISGAAAL                                                                 | +2                       |            | 2.925         | 0.442                      | 0.9979                         | 2     |          |         |
|       | MASCOT:(PepMatched Observed.Hits Coverage)                                   |                          |            | 2             | 1                          | 8.25%                          |       |          |         |
|       | Seq                                                                          | Charge                   | ObservedMS | ExpectedMS    | CalculatedMS               |                                |       | Pepscore | PepHits |
|       | VYGTGSLALYEK                                                                 | +2                       | 650.84     | 1299.67       | 1299.67                    | 0                              | 73    | 4        |         |
|       | THSDQFLVSFK                                                                  | +2                       | 654.84     | 1307.66       | 1307.65                    | 0.01                           | 55    | 6        |         |
| No.   | Protein                                                                      | Matched (SEQUEST MASCOT) | emPAI      | Strategy.Hits | PepMatched(SEQUEST MASCOT) | SpectraMatched(SEQUEST MASCOT) |       |          |         |
| 248.  | IPI00191737                                                                  | Y Y                      | 0.82       | 4             | 20 18                      | 90                             | 80    |          |         |
| *Des: | Serum albumin precursor                                                      |                          |            |               |                            |                                |       |          |         |
|       | SEQUEST:(PepMatched Observed.Hits Coverage)                                  |                          |            | 20            | 10                         | 43.13%                         |       |          |         |
|       | Seq                                                                          | Charge                   | Xcor       | Delta         | Proability                 | PepHits                        |       |          |         |
|       | TCVADENAENCDK                                                                | +2                       |            | 4.453         | 0.493                      | 1.0000                         | 1     |          |         |
|       | YMCENQATISSK                                                                 | +2                       |            | 4.367         | 0.575                      | 1.0000                         | 6     |          |         |

Identified Human Platelet Proteins

| Seq                                        | Charge | ObservedMS | ExpectedMS | CalculatedMS | PepScore | PepHits |
|--------------------------------------------|--------|------------|------------|--------------|----------|---------|
| LVQEVTDFAK                                 | +2     | 3.401      | 0.368      | 0.9990       | 6        |         |
| TVMGDFAQFVDK                               | +2     | 4.100      | 0.615      | 1.0000       | 9        |         |
| LPCVEDYLSAILNR                             | +2     | 3.985      | 0.549      | 1.0000       | 3        |         |
| DVFLGTFLYEYSR                              | +2     | 3.607      | 0.557      | 1.0000       | 2        |         |
| CCTLPEAQR LPCVEDYLSAILNR                   |        | +3         | 4.609      | 0.452        | 0.9998   | 1       |
| TPVSEKVTK                                  | +2     | 2.797      | 0.348      | 0.9853       | 12       |         |
| AADKDNCFATEGPNLVAR                         | +3     | 5.146      | 0.427      | 1.0000       | 3        |         |
| AETFTFHSDICTLPDKEK                         | +3     | 3.225      | 0.345      | 0.9830       | 1        |         |
| GLVLIAFSQYLQK                              | +2     | 4.553      | 0.552      | 1.0000       | 19       |         |
| FKDLGEQHFK                                 | +3     | 3.820      | 0.285      | 0.9996       | 15       |         |
| LQACCDKPV LQK                              | +2     | 3.437      | 0.318      | 0.9972       | 1        |         |
| KQTALAE LK                                 | +2     | 3.302      | 0.372      | 0.9989       | 3        |         |
| MSQRFPNAEFAEITK                            | +2     | 4.169      | 0.533      | 1.0000       | 9        |         |
| RPCFSALTVD ETYVPK                          | +2     | 3.030      | 0.390      | 0.9969       | 3        |         |
| APQVSTPTLVEAAR                             | +2     | 3.495      | 0.575      | 1.0000       | 7        |         |
| YTQKAPQVSTPTLVEAAR                         | +2     | 4.859      | 0.508      | 1.0000       | 12       |         |
| RHPDYSV SLLL R                             | +3     | 5.254      | 0.435      | 1.0000       | 20       |         |
| SIHTLFGDKLCAIPK                            | +2     | 3.432      | 0.535      | 0.9990       | 1        |         |
| MASCOT:(PepMatched Observed.Hits Coverage) |        | 18         | 12         | 37.64%       |          |         |
| Seq                                        | Charge | ObservedMS | ExpectedMS | CalculatedMS |          |         |
| LPCVEDYLSAILNR                             | +2     | 803.4247   | 1604.8348  | 1604.8232    | 0.01     | 65      |
| YMCENQATISSK                               | +2     | 687.8101   | 1373.6057  | 1373.5955    | 0.01     | 93      |
| LVQEVTDFAK                                 | +2     | 575.3148   | 1148.6151  | 1148.6077    | 0.01     | 51      |
| TCVADENAENCDK                              | +2     | 706.2803   | 1410.5461  | 1410.5391    | 0.01     | 80      |
| TVMGDFAQFVDK                               | +2     | 679.3316   | 1356.6487  | 1356.6383    | 0.01     | 75      |
| DVFLGTFLYEYSR                              | +2     | 805.4083   | 1608.8020  | 1608.7823    | 0.02     | 49      |
| AADKDNCFATEGPNLVAR                         | +2     | 946.4615   | 1890.9085  | 1890.8893    | 0.02     | 92      |
| TPVSEKVTK                                  | +2     | 495.4859   | 988.9573   | 987.5600     | 1.4      | 50      |
| EAHKSEIAHR                                 | +2     | 589.3110   | 1176.6074  | 1176.5999    | 0.01     | 55      |
| KQTALAE LK                                 | +2     | 550.8409   | 1099.6672  | 1099.6601    | 0.01     | 80      |
| MSQRFPNAEFAEITK                            | +2     | 884.9463   | 1767.8780  | 1767.8613    | 0.02     | 73      |
| GLVLIAFSQYLQK                              | +2     | 740.4373   | 1478.8600  | 1478.8496    | 0.01     | 87      |
| FKDLGEQHFK                                 | +2     | 624.8270   | 1247.6395  | 1247.6298    | 0.01     | 58      |
| LQACCDKPV LQK                              | +2     | 673.3571   | 1344.6996  | 1344.6893    | 0.01     | 51      |
| APQVSTPTLVEAAR                             | +2     | 720.4003   | 1438.7860  | 1438.7780    | 0.01     | 71      |
| YTQKAPQVSTPTLVEAAR                         | +2     | 980.5359   | 1959.0573  | 1959.0425    | 0.01     | 91      |
| RHPDYSV SLLL R                             | +3     | 485.9428   | 1454.8067  | 1454.7994    | 0.01     | 89      |
| SIHTLFGDKLCAIPK                            | +2     | 821.9601   | 1641.9057  | 1641.8912    | 0.01     | 51      |

| No.   | Protein                                     | Matched (SEQUEST MASCOT) | emPAI | Strategy.Hits | PepMatched(SEQUEST MASCOT) | SpectraMatched(SEQUEST MASCOT) |
|-------|---------------------------------------------|--------------------------|-------|---------------|----------------------------|--------------------------------|
| 249.  | IPI00190862                                 | Y N                      | 0.33  | 1             | 2                          | 0                              |
| *Des: | Golgi phosphoprotein 3                      |                          |       |               |                            |                                |
|       | SEQUEST:(PepMatched Observed.Hits Coverage) |                          | 2     | 1             | 9.9%                       |                                |
|       | Seq                                         | Charge                   | Xcor  | Delta         | Probility                  | PepHits                        |
|       | LTMEEVLLLGLK                                | +2                       | 3.328 | 0.352         | 0.9978                     | 1                              |
|       | ANTNEVLWAVVAFT                              | +2                       | 3.620 | 0.640         | 1.0000                     | 2                              |
|       | MASCOT:(PepMatched Observed.Hits Coverage)  |                          |       |               |                            |                                |

Identified Human Platelet Proteins

No. 250. Protein IPI00421602 Matched (SEQUEST MASCOT) N Y emPAI Strategy.Hits 1.78 1 PepMatched(SEQUEST MASCOT) 0 SpectraMatched(SEQUEST MASCOT) 4 0 29

\*Des: Ferritin light chain 1

SEQUEST:(PepMatched Observed.Hits Coverage)

MASCOT:(PepMatched Observed.Hits Coverage)

| Seq              | Charge | ObservedMS | ExpectedMS | CalculatedMS | Pepscore | PepHits |
|------------------|--------|------------|------------|--------------|----------|---------|
| DDVALEGVGHFFR    | +2     | 731.37     | 1460.73    | 1460.70      | 0.03     | 67      |
| NLNQALLDLHALGSAR | +2     | 853.48     | 1704.94    | 1704.93      | 0.01     | 98      |
| TLEAMEAALALEK    | +2     | 695.37     | 1388.73    | 1388.72      | 0.01     | 89      |
| ASYTYLSLGLFFDR   | +2     | 843.92     | 1685.82    | 1685.81      | 0.01     | 50      |

No. 251. Protein IPI00362469 Matched (SEQUEST MASCOT) Y Y emPAI Strategy.Hits 1.16 2 PepMatched(SEQUEST MASCOT) 7 SpectraMatched(SEQUEST MASCOT) 6 15 13

\*Des: PREDICTED: similar to 6-phosphogluconolactonase

SEQUEST:(PepMatched Observed.Hits Coverage)

| Seq                        | Charge | Xcor  | Delta | Probability | PepHits |
|----------------------------|--------|-------|-------|-------------|---------|
| LPIPDSQVLTIDPALPVEDAAEDYAR | +3     | 4.075 | 0.290 | 0.9974      | 1       |
| FALGLSGGSLVSMLAR           | +2     | 4.261 | 0.478 | 1.0000      | 2       |
| VTLTLPVLNAAQSVIFVATGEGK    | +3     | 4.475 | 0.529 | 1.0000      | 1       |
| IVAPIGDSPPKPPPQR           | +2     | 3.758 | 0.521 | 1.0000      | 8       |
| DLPAATAPAGPASFR            | +2     | 4.597 | 0.520 | 1.0000      | 4       |
| ILEDQESALPAAMVQPR          | +2     | 4.889 | 0.409 | 1.0000      | 2       |
| LVPFDHAESTYGLYR            | +2     | 3.540 | 0.604 | 1.0000      | 3       |

MASCOT:(PepMatched Observed.Hits Coverage)

| Seq               | Charge | ObservedMS | ExpectedMS | CalculatedMS | Pepscore | PepHits |
|-------------------|--------|------------|------------|--------------|----------|---------|
| IVAPIGDSPPKPPPQR  | +2     | 786.46     | 1570.90    | 1570.88      | 0.02     | 80      |
| DLPAATAPAGPASFR   | +2     | 756.90     | 1511.79    | 1511.77      | 0.02     | 68      |
| ILEDQESALPAAMVQPR | +2     | 934.49     | 1866.96    | 1866.95      | 0.01     | 81      |
| LLSVPFEK          | +2     | 466.78     | 931.54     | 931.54       | 0        | 41      |
| LVPFDHAESTYGLYR   | +2     | 884.45     | 1766.88    | 1766.86      | 0.02     | 80      |
| FALGLSGGSLVSMLAR  | +2     | 789.94     | 1577.87    | 1577.86      | 0.01     | 101     |

No. 252. Protein IPI00211756 Matched (SEQUEST MASCOT) Y Y emPAI Strategy.Hits 0.96 1 PepMatched(SEQUEST MASCOT) 6 SpectraMatched(SEQUEST MASCOT) 10 13 48

\*Des: Prohibitin

SEQUEST:(PepMatched Observed.Hits Coverage)

| Seq                     | Charge | Xcor  | Delta | Probability | PepHits |
|-------------------------|--------|-------|-------|-------------|---------|
| FGLALAVAGGVNSALYNVDAGHR | +3     | 4.954 | 0.575 | 1.0000      | 4       |
| AATFGLILDDVSLTHLTFGK    | +2     | 5.528 | 0.668 | 1.0000      | 2       |
| DLQNVNITLR              | +2     | 3.380 | 0.325 | 0.9992      | 3       |
| FDAGELITQR              | +2     | 3.696 | 0.444 | 0.9996      | 8       |
| KLEAAEDIAYQLSR          | +2     | 5.363 | 0.491 | 1.0000      | 5       |
| NITYLPAGQSVLLQLP        | +2     | 3.513 | 0.471 | 0.9994      | 3       |

MASCOT:(PepMatched Observed.Hits Coverage)

| Seq       | Charge | ObservedMS | ExpectedMS | CalculatedMS | Pepscore | PepHits |
|-----------|--------|------------|------------|--------------|----------|---------|
| EFTEAVEAK | +2     | 512.26     | 1022.50    | 1022.49      | 0.01     | 46      |

Identified Human Platelet Proteins

|                         |    |        |         |         |      |     |    |  |
|-------------------------|----|--------|---------|---------|------|-----|----|--|
| IYTSIGEDYDER            | +2 | 730.84 | 1459.66 | 1459.65 | 0.01 | 74  | 4  |  |
| FDAGELITQR              | +2 | 575.30 | 1148.59 | 1148.58 | 0.01 | 72  | 12 |  |
| DLQNVNITLR              | +2 | 593.34 | 1184.66 | 1184.65 | 0.01 | 66  | 9  |  |
| KLEAAEDIAYQLSR          | +2 | 803.94 | 1605.86 | 1605.84 | 0.02 | 120 | 10 |  |
| VLPSITTEILK             | +2 | 607.38 | 1212.74 | 1212.73 | 0.01 | 46  | 11 |  |
| NITYLPAGQSVLLQLPQ       | +2 | 928.03 | 1854.04 | 1854.03 | 0.01 | 44  | 3  |  |
| AAELIANSLATAGDGLIELR    | +2 | 999.56 | 1997.10 | 1997.08 | 0.02 | 115 | 21 |  |
| AATFGLILDDVSLTHLTFGK    | +3 | 707.06 | 2118.15 | 2118.14 | 0.01 | 67  | 1  |  |
| FGLALAVAGGVNSALYNVDAGHR | +3 | 791.09 | 2370.26 | 2370.24 | 0.02 | 75  | 2  |  |

|       |                                                         |                          |            |               |                            |                                |          |         |
|-------|---------------------------------------------------------|--------------------------|------------|---------------|----------------------------|--------------------------------|----------|---------|
| No.   | Protein                                                 | Matched (SEQUEST MASCOT) | emPAI      | Strategy.Hits | PepMatched(SEQUEST MASCOT) | SpectraMatched(SEQUEST MASCOT) |          |         |
| 253.  | IPI00202790                                             | Y                        | Y          | 0.1           | 1                          | 2                              | 2        | 4       |
| *Des: | PREDICTED: similar to GAS2-related protein isoform beta |                          |            |               |                            |                                |          |         |
|       | SEQUEST:(PepMatched Observed.Hits Coverage)             | 2                        | 1          | 4.59%         |                            |                                |          |         |
|       | Seq                                                     | Charge                   | Xcor       | Delta         | Proability                 | PepHits                        |          |         |
|       | VGDSLLIFVR                                              | +2                       | 3.699      | 0.351         | 0.9987                     | 5                              |          |         |
|       | AELGVPEVLMFETEDLVLR                                     | +2                       | 4.132      | 0.638         | 1.0000                     | 1                              |          |         |
|       | MASCOT:(PepMatched Observed.Hits Coverage)              | 2                        | 1          | 3.29%         |                            |                                |          |         |
|       | Seq                                                     | Charge                   | ObservedMS | ExpectedMS    | CalculatedMS               |                                | Pepscore | PepHits |
|       | LVQFEQEIER                                              | +2                       | 645.84     | 1289.67       | 1289.66                    | 0.01                           | 41       | 2       |
|       | VGDSLLIFVR                                              | +2                       | 603.66     | 1205.31       | 1204.68                    | 0.63                           | 45       | 2       |

|       |                                             |                          |            |               |                            |                                |          |         |
|-------|---------------------------------------------|--------------------------|------------|---------------|----------------------------|--------------------------------|----------|---------|
| No.   | Protein                                     | Matched (SEQUEST MASCOT) | emPAI      | Strategy.Hits | PepMatched(SEQUEST MASCOT) | SpectraMatched(SEQUEST MASCOT) |          |         |
| 254.  | IPI00476880                                 | N                        | Y          | 0.21          | 1                          | 0                              | 2        | 0       |
| *Des: | 22 kDa protein                              |                          |            |               |                            |                                |          |         |
|       | SEQUEST:(PepMatched Observed.Hits Coverage) | 2                        | 1          | 12.31%        |                            |                                |          |         |
|       | MASCOT:(PepMatched Observed.Hits Coverage)  | 2                        | 1          | 12.31%        |                            |                                |          |         |
|       | Seq                                         | Charge                   | ObservedMS | ExpectedMS    | CalculatedMS               |                                | Pepscore | PepHits |
|       | GLFIIDDKGILR                                | +2                       | 680.4042   | 1358.7939     | 1358.7921                  | 0                              | 46       | 2       |
|       | ATAVMPDGQFK                                 | +2                       | 582.7889   | 1163.5632     | 1163.5645                  | 0                              | 45       | 4       |

|       |                                             |                          |            |               |                            |                                |          |         |
|-------|---------------------------------------------|--------------------------|------------|---------------|----------------------------|--------------------------------|----------|---------|
| No.   | Protein                                     | Matched (SEQUEST MASCOT) | emPAI      | Strategy.Hits | PepMatched(SEQUEST MASCOT) | SpectraMatched(SEQUEST MASCOT) |          |         |
| 255.  | IPI00555262                                 | N                        | Y          | 0.46          | 1                          | 0                              | 2        | 0       |
| *Des: | Hypothetical protein                        |                          |            |               |                            |                                |          |         |
|       | SEQUEST:(PepMatched Observed.Hits Coverage) | 2                        | 1          | 15.13%        |                            |                                |          |         |
|       | MASCOT:(PepMatched Observed.Hits Coverage)  | 2                        | 1          | 15.13%        |                            |                                |          |         |
|       | Seq                                         | Charge                   | ObservedMS | ExpectedMS    | CalculatedMS               |                                | Pepscore | PepHits |
|       | GAEEMETVIPVDIMR                             | +2                       | 845.4179   | 1688.8213     | 1688.8113                  | 0.01                           | 48       | 2       |
|       | VTVAGLAGKDPVQCSR                            | +2                       | 800.9339   | 1599.8532     | 1599.8402                  | 0.01                           | 55       | 2       |

|       |                                              |                          |       |               |                            |                                |   |   |
|-------|----------------------------------------------|--------------------------|-------|---------------|----------------------------|--------------------------------|---|---|
| No.   | Protein                                      | Matched (SEQUEST MASCOT) | emPAI | Strategy.Hits | PepMatched(SEQUEST MASCOT) | SpectraMatched(SEQUEST MASCOT) |   |   |
| 256.  | IPI00421539                                  | Y                        | Y     | 0.3           | 3                          | 5                              | 4 | 9 |
| *Des: | Aconitate hydratase, mitochondrial precursor |                          |       |               |                            |                                |   |   |
|       | SEQUEST:(PepMatched Observed.Hits Coverage)  | 5                        | 3     | 11.6%         |                            |                                |   |   |
|       | Seq                                          | Charge                   | Xcor  | Delta         | Proability                 | PepHits                        |   |   |
|       | IVYGHLLDDPANQEIER                            | +3                       | 3.175 | 0.283         | 0.9947                     | 1                              |   |   |
|       | SQFTITPGSEQIR                                | +2                       | 2.746 | 0.353         | 0.9944                     | 2                              |   |   |

Identified Human Platelet Proteins

| NAVTQEFGPVPDTAR                            | +2     | 3.530      | 0.542      | 0.9999       | 1         |      |          |         |
|--------------------------------------------|--------|------------|------------|--------------|-----------|------|----------|---------|
| QGLLPLTFADPSDYNK                           | +2     | 3.369      | 0.434      | 0.9994       | 1         |      |          |         |
| NDANPETHAFVTSPEIVTALAIAGTLK                | +3     | 5.007      | 0.573      | 1.0000       | 1         |      |          |         |
| MASCOT:(PepMatched Observed.Hits Coverage) | 4      | 3          | 6.93%      |              |           |      |          |         |
| Seq                                        | Charge | ObservedMS | ExpectedMS | CalculatedMS |           |      | PepScore | PepHits |
| DLEDLQILIK                                 | +2     | 600.3557   | 1198.6969  | 1198.6809    | 0.02      | 58   | 2        |         |
| FKLEAPDADELPR                              | +2     | 750.9008   | 1499.7871  | 1499.7620    | 0.03      | 41   | 2        |         |
| IVYGHLDPPANQEIER                           | +2     |            | 934.9783   | 1867.9420    | 1867.9064 | 0.04 | 71       | 4       |
| LQLEPFDPKWDGKDLEDLQILIK                    | +3     |            | 924.5041   | 2770.4906    | 2768.5000 | 1.99 | 39       | 2       |

No. 257. Protein IPI00200258 Matched (SEQUEST MASCOT) Y Y emPAI 0.27 Strategy.Hits 3 PepMatched(SEQUEST MASCOT) 7 SpectraMatched(SEQUEST MASCOT) 15

\*Des: EH-domain containing protein 2

| SEQUEST:(PepMatched Observed.Hits Coverage) | 7        | 6          | 27.57%     |              |         |     |          |         |
|---------------------------------------------|----------|------------|------------|--------------|---------|-----|----------|---------|
| Seq                                         | Charge   | Xcor       | Delta      | Proability   | PepHits |     |          |         |
| LFEAEEQDLFK                                 | +2       | 3.449      | 0.336      | 0.9990       | 2       |     |          |         |
| LDISDEFSEVIK                                | +2       | 3.860      | 0.463      | 0.9999       | 2       |     |          |         |
| LADIDKDGMLDDEEFALANHLIK                     | +3       | 6.401      | 0.478      | 1.0000       | 4       |     |          |         |
| GGAFEGTLQGPFHGEGEGAGEGIDDAEWVVAR            | +3       | 7.087      | 0.526      | 1.0000       | 2       |     |          |         |
| DKPMYDEIFYTLSPVDGK                          | +3       | 3.413      | 0.301      | 0.9981       | 1       |     |          |         |
| IGPEPTTDSFIAVMQGDVEGIIPGNALVVDPK            | +3       | 4.615      | 0.357      | 1.0000       | 1       |     |          |         |
| GYDFAAVLEWFAER+2                            | 3.316    | 0.286      | 0.9949     | 4            |         |     |          |         |
| MASCOT:(PepMatched Observed.Hits Coverage)  | 7        | 6          | 27.57%     |              |         |     |          |         |
| Seq                                         | Charge   | ObservedMS | ExpectedMS | CalculatedMS |         |     | PepScore | PepHits |
| LFEAEEQDLFK                                 | +2       | 684.8484   | 1367.6823  | 1367.6608    | 0.02    | 43  | 1        |         |
| DKPMYDEIFYTLSPVDGK                          | +2       | 1059.5282  | 2117.0418  | 2117.0027    | 0.04    | 73  | 3        |         |
| LADIDKDGMLDDEEFALANHLIK                     | +3       | 862.7794   | 2585.3162  | 2585.2683    | 0.05    | 75  | 1        |         |
| IGPEPTTDSFIAVMQGDVEGIIPGNALVVDPK            | +3       | 1093.9236  | 3278.7489  | 3278.6743    | 0.07    | 56  | 2        |         |
| GGAFEGTLQGPFHGEGEGAGEGIDDAEWVVAR            | +3       | 1102.8619  | 3305.5640  | 3305.5012    | 0.06    | 102 | 2        |         |
| GYDFAAVLEWFAER+2                            | 837.4125 | 1672.8104  | 1672.7885  | 0.02         | 55      | 11  |          |         |
| LDISDEFSEVIK                                | +2       | 697.8672   | 1393.7198  | 1393.6976    | 0.02    | 87  | 4        |         |

No. 258. Protein IPI00197550 Matched (SEQUEST MASCOT) Y N emPAI 0.24 Strategy.Hits 1 PepMatched(SEQUEST MASCOT) 2 SpectraMatched(SEQUEST MASCOT) 4

\*Des: cAMP-dependent protein kinase, beta-catalytic subunit

| SEQUEST:(PepMatched Observed.Hits Coverage) | 2      | 1     | 3.65% |            |         |  |  |  |
|---------------------------------------------|--------|-------|-------|------------|---------|--|--|--|
| Seq                                         | Charge | Xcor  | Delta | Proability | PepHits |  |  |  |
| LKQIEHTLNEK                                 | +2     | 3.335 | 0.249 | 0.9679     | 2       |  |  |  |
| LKQIEHTLNEKR                                | +3     | 3.540 | 0.298 | 0.9992     | 4       |  |  |  |

MASCOT:(PepMatched Observed.Hits Coverage)

No. 259. Protein IPI00607114 Matched (SEQUEST MASCOT) N Y emPAI 0.23 Strategy.Hits 1 PepMatched(SEQUEST MASCOT) 0 SpectraMatched(SEQUEST MASCOT) 12

\*Des: Ig gamma-2A chain C region

| SEQUEST:(PepMatched Observed.Hits Coverage) | 2      | 1          | 7.31%      |              |  |  |          |         |
|---------------------------------------------|--------|------------|------------|--------------|--|--|----------|---------|
| MASCOT:(PepMatched Observed.Hits Coverage)  | 2      | 1          | 7.31%      |              |  |  |          |         |
| Seq                                         | Charge | ObservedMS | ExpectedMS | CalculatedMS |  |  | PepScore | PepHits |

Identified Human Platelet Proteins

|              |    |        |         |         |      |    |   |
|--------------|----|--------|---------|---------|------|----|---|
| SVSELPIVHR   | +2 | 568.83 | 1135.64 | 1135.63 | 0.01 | 45 | 6 |
| VNSGAFPAPIEK | +2 | 615.33 | 1228.65 | 1228.65 | 0    | 49 | 6 |

No. 260. Protein IPI00358660 Matched (SEQUEST MASCOT) N Y emPAI 0.05 Strategy.Hits 1 PepMatched(SEQUEST MASCOT) 0 SpectraMatched(SEQUEST MASCOT) 2

\*Des: PREDICTED: similar to NF-kappa-B-repressing factor (NFkB-repressing factor) (Transcription factor NRF)

SEQUEST:(PepMatched Observed.Hits Coverage)

|                                            |        |              |                  |
|--------------------------------------------|--------|--------------|------------------|
| MASCOT:(PepMatched Observed.Hits Coverage) | 2      | 1            | 3.25%            |
| Seq                                        | Charge | ObservedMS   | ExpectedMS       |
| FEGETTHTQPGVQLR                            | +2     | 898.96       | 1795.90          |
| EDSYKPIVEFIDAQFEAYLQEELK                   | +3     | 968.81       | 2903.42          |
|                                            |        | CalculatedMS | Pepscore PepHits |
|                                            |        | 1795.89      | 0.01 44          |
|                                            |        | 2903.41      | 0.01 49          |

No. 261. Protein IPI00188804 Matched (SEQUEST MASCOT) N Y emPAI 1.04 Strategy.Hits 1 PepMatched(SEQUEST MASCOT) 0 SpectraMatched(SEQUEST MASCOT) 7

\*Des: 60S acidic ribosomal protein P2

SEQUEST:(PepMatched Observed.Hits Coverage)

|                                            |        |              |                  |
|--------------------------------------------|--------|--------------|------------------|
| MASCOT:(PepMatched Observed.Hits Coverage) | 2      | 1            | 40.17%           |
| Seq                                        | Charge | ObservedMS   | ExpectedMS       |
| LASVPAGGAVAVSAAPGSAAPAAGSAPAAAEK           | +3     | 925.48       | 2773.43          |
| NIEDVIAQGVGK                               | +2     | 622.82       | 1243.63          |
|                                            |        | CalculatedMS | Pepscore PepHits |
|                                            |        | 2773.42      | 0.01 64          |
|                                            |        | 1241.66      | 1.97 41          |

No. 262. Protein IPI00196751 Matched (SEQUEST MASCOT) Y N emPAI 0.16 Strategy.Hits 1 PepMatched(SEQUEST MASCOT) 2 SpectraMatched(SEQUEST MASCOT) 0

\*Des: Heat shock 70 kDa protein 1A/1B

SEQUEST:(PepMatched Observed.Hits Coverage)

|                                            |        |           |         |
|--------------------------------------------|--------|-----------|---------|
| MASCOT:(PepMatched Observed.Hits Coverage) | 2      | 2         | 3.98%   |
| Seq                                        | Charge | Xcor      | Delta   |
| VEIANDQGNR                                 | +2     | 3.400     | 0.379   |
| TTPSYVAFTDTER                              | +2     | 2.757     | 0.421   |
|                                            |        | Probility | PepHits |
|                                            |        | 0.9995    | 4       |
|                                            |        | 0.9986    | 3       |

No. 263. Protein IPI00480698 Matched (SEQUEST MASCOT) Y Y emPAI 0.47 Strategy.Hits 1 PepMatched(SEQUEST MASCOT) 5 SpectraMatched(SEQUEST MASCOT) 8

\*Des: 37 kDa protein

SEQUEST:(PepMatched Observed.Hits Coverage)

|                                            |        |           |         |
|--------------------------------------------|--------|-----------|---------|
| MASCOT:(PepMatched Observed.Hits Coverage) | 5      | 1         | 28.34%  |
| Seq                                        | Charge | Xcor      | Delta   |
| SFDQLTPEESKER                              | +2     | 3.176     | 0.448   |
| IDGDKDGFVTVDLTK                            | +2     | 4.059     | 0.565   |
| DIVVQETMEDIDK                              | +2     | 4.685     | 0.517   |
| GHDLNEDGLVSWEEYK                           | +2     | 4.685     | 0.517   |
| NADGFIDLEEYIGDMYSHDGNADPEWVK               | +3     | 4.891     | 0.486   |
|                                            |        | Probility | PepHits |
|                                            |        | 0.9925    | 2       |
|                                            |        | 0.362     | 2       |
|                                            |        | 1.0000    | 2       |
|                                            |        | 1.0000    | 1       |
|                                            |        | 0.9999    | 2       |

MASCOT:(PepMatched Observed.Hits Coverage)

|                          |        |              |                  |
|--------------------------|--------|--------------|------------------|
| Seq                      | Charge | ObservedMS   | ExpectedMS       |
| SFDQLTPEESK              | +2     | 640.80       | 1279.59          |
| EEIVDKYDLFVGSQATDFGEALVR | +3     | 901.12       | 2700.33          |
|                          |        | CalculatedMS | Pepscore PepHits |
|                          |        | 1279.59      | 0 45             |
|                          |        | 2700.33      | 0 41             |

No. 264. Protein IPI00464587 Matched (SEQUEST MASCOT) Y Y emPAI 0.28 Strategy.Hits 3 PepMatched(SEQUEST MASCOT) 3 SpectraMatched(SEQUEST MASCOT) 4

**Identified Human Platelet Proteins**

|              |                                                                                |                                 |                   |                      |                                   |                                       |        |                 |                |  |
|--------------|--------------------------------------------------------------------------------|---------------------------------|-------------------|----------------------|-----------------------------------|---------------------------------------|--------|-----------------|----------------|--|
| <b>*Des:</b> | <b>Tubulin alpha-8 chain</b>                                                   |                                 |                   |                      |                                   |                                       |        |                 |                |  |
|              | <b>SEQUEST:(PepMatched Observed.Hits Coverage)</b> 3 2 11.37%                  |                                 |                   |                      |                                   |                                       |        |                 |                |  |
|              | <b>Seq</b>                                                                     | <b>Charge</b>                   | <b>Xcor</b>       | <b>Delta</b>         | <b>Proability</b>                 | <b>PepHits</b>                        |        |                 |                |  |
|              | AVMVDLEPTVVDEVR                                                                |                                 |                   | +2                   | 4.740                             | 0.431                                 | 0.9999 | 1               |                |  |
|              | INDDDSFTTFFSETGNGK                                                             |                                 |                   | +2                   | 5.488                             | 0.605                                 | 1.0000 | 1               |                |  |
|              | IHFPLVTYAPIVSAEK                                                               |                                 |                   | +2                   | 3.728                             | 0.571                                 | 1.0000 | 2               |                |  |
|              | <b>MASCOT:(PepMatched Observed.Hits Coverage)</b> 4 3 14.66%                   |                                 |                   |                      |                                   |                                       |        |                 |                |  |
|              | <b>Seq</b>                                                                     | <b>Charge</b>                   | <b>ObservedMS</b> |                      | <b>ExpectedMS</b>                 | <b>CalculatedMS</b>                   |        | <b>Pepscore</b> | <b>PepHits</b> |  |
|              | AVMVDLEPTVVDEVR                                                                |                                 | +2                | 835.9443             | 1669.8741                         | 1670.8549                             | -0.97  | 51              | 2              |  |
|              | LDHKFDLMYAK                                                                    |                                 | +3                | 460.9067             | 1379.6982                         | 1379.6907                             | 0.01   | 49              | 24             |  |
|              | QLFHPEQLITGKEDAANNYAR                                                          |                                 | +3                | 805.7475             | 2414.2207                         | 2414.1978                             | 0.02   | 58              | 3              |  |
|              | IHFPLVTYAPIVSAEK                                                               |                                 | +2                | 893.0076             | 1784.0006                         | 1783.9872                             | 0.01   | 51              | 3              |  |
|              |                                                                                |                                 |                   |                      |                                   |                                       |        |                 |                |  |
| <b>No.</b>   | <b>Protein</b>                                                                 | <b>Matched (SEQUEST MASCOT)</b> | <b>emPAI</b>      | <b>Strategy.Hits</b> | <b>PepMatched(SEQUEST MASCOT)</b> | <b>SpectraMatched(SEQUEST MASCOT)</b> |        |                 |                |  |
| 265.         | IPI00370703                                                                    | Y Y                             | 0.04              | 2                    | 3 2                               | 4 10                                  |        |                 |                |  |
| <b>*Des:</b> | <b>PREDICTED: similar to Myosin, light polypeptide kinase, telokin isoform</b> |                                 |                   |                      |                                   |                                       |        |                 |                |  |
|              | <b>SEQUEST:(PepMatched Observed.Hits Coverage)</b> 3 2 1.36%                   |                                 |                   |                      |                                   |                                       |        |                 |                |  |
|              | <b>Seq</b>                                                                     | <b>Charge</b>                   | <b>Xcor</b>       | <b>Delta</b>         | <b>Proability</b>                 | <b>PepHits</b>                        |        |                 |                |  |
|              | DLEVVEGSAAR                                                                    |                                 | +2                | 3.478                | 0.414                             | 0.9996                                | 1      |                 |                |  |
|              | VSDVYDIEER                                                                     |                                 | +2                | 3.113                | 0.210                             | 0.9868                                | 1      |                 |                |  |
|              | IEGYPDPEVVWFK                                                                  |                                 | +2                | 2.936                | 0.431                             | 0.9989                                | 1      |                 |                |  |
|              | <b>MASCOT:(PepMatched Observed.Hits Coverage)</b> 2 2 0.91%                    |                                 |                   |                      |                                   |                                       |        |                 |                |  |
|              | <b>Seq</b>                                                                     | <b>Charge</b>                   | <b>ObservedMS</b> |                      | <b>ExpectedMS</b>                 | <b>CalculatedMS</b>                   |        | <b>Pepscore</b> | <b>PepHits</b> |  |
|              | RLENAGSLK                                                                      |                                 | +2                | 494.2860             | 986.5575                          | 986.5508                              | 0.01   | 45              | 5              |  |
|              | LFAPIFLQGLSDLK                                                                 |                                 | +2                | 781.4584             | 1560.9023                         | 1560.8915                             | 0.01   | 52              | 5              |  |
|              |                                                                                |                                 |                   |                      |                                   |                                       |        |                 |                |  |
| <b>No.</b>   | <b>Protein</b>                                                                 | <b>Matched (SEQUEST MASCOT)</b> | <b>emPAI</b>      | <b>Strategy.Hits</b> | <b>PepMatched(SEQUEST MASCOT)</b> | <b>SpectraMatched(SEQUEST MASCOT)</b> |        |                 |                |  |
| 266.         | IPI00364144                                                                    | Y Y                             | 0.13              | 1                    | 2 2                               | 2 2                                   |        |                 |                |  |
| <b>*Des:</b> | <b>PREDICTED: similar to RIKEN cDNA 1110067D22</b>                             |                                 |                   |                      |                                   |                                       |        |                 |                |  |
|              | <b>SEQUEST:(PepMatched Observed.Hits Coverage)</b> 2 1 5.87%                   |                                 |                   |                      |                                   |                                       |        |                 |                |  |
|              | <b>Seq</b>                                                                     | <b>Charge</b>                   | <b>Xcor</b>       | <b>Delta</b>         | <b>Proability</b>                 | <b>PepHits</b>                        |        |                 |                |  |
|              | IQTLSAIDTIK                                                                    |                                 | +2                | 2.727                | 0.596                             | 0.9946                                | 2      |                 |                |  |
|              | LDDGHLNNSLGSVPQADVYFPR                                                         |                                 | +3                | 4.665                | 0.706                             | 1.0000                                | 1      |                 |                |  |
|              | <b>MASCOT:(PepMatched Observed.Hits Coverage)</b> 2 1 5.87%                    |                                 |                   |                      |                                   |                                       |        |                 |                |  |
|              | <b>Seq</b>                                                                     | <b>Charge</b>                   | <b>ObservedMS</b> |                      | <b>ExpectedMS</b>                 | <b>CalculatedMS</b>                   |        | <b>Pepscore</b> | <b>PepHits</b> |  |
|              | IQTLSAIDTIK                                                                    |                                 | +2                | 601.85               | 1201.69                           | 1201.69                               | 0      | 47              | 2              |  |
|              | LDDGHLNNSLGSVPQADVYFPR                                                         |                                 | +3                | 805.40               | 2413.17                           | 2413.17                               | 0      | 43              | 1              |  |
|              |                                                                                |                                 |                   |                      |                                   |                                       |        |                 |                |  |
| <b>No.</b>   | <b>Protein</b>                                                                 | <b>Matched (SEQUEST MASCOT)</b> | <b>emPAI</b>      | <b>Strategy.Hits</b> | <b>PepMatched(SEQUEST MASCOT)</b> | <b>SpectraMatched(SEQUEST MASCOT)</b> |        |                 |                |  |
| 267.         | IPI00215107                                                                    | Y Y                             | 0.32              | 1                    | 2 3                               | 3 5                                   |        |                 |                |  |
| <b>*Des:</b> | <b>40S ribosomal protein SA</b>                                                |                                 |                   |                      |                                   |                                       |        |                 |                |  |
|              | <b>SEQUEST:(PepMatched Observed.Hits Coverage)</b> 2 2 10.03%                  |                                 |                   |                      |                                   |                                       |        |                 |                |  |
|              | <b>Seq</b>                                                                     | <b>Charge</b>                   | <b>Xcor</b>       | <b>Delta</b>         | <b>Proability</b>                 | <b>PepHits</b>                        |        |                 |                |  |
|              | FAAATGATPIAGR                                                                  |                                 | +2                | 3.166                | 0.330                             | 0.9974                                | 4      |                 |                |  |
|              | FTPGTFTNQIAAFR                                                                 |                                 | +2                | 3.001                | 0.327                             | 0.9945                                | 1      |                 |                |  |
|              | <b>MASCOT:(PepMatched Observed.Hits Coverage)</b> 3 2 13.04%                   |                                 |                   |                      |                                   |                                       |        |                 |                |  |
|              | <b>Seq</b>                                                                     | <b>Charge</b>                   | <b>ObservedMS</b> |                      | <b>ExpectedMS</b>                 | <b>CalculatedMS</b>                   |        | <b>Pepscore</b> | <b>PepHits</b> |  |

Identified Human Platelet Proteins

|                |    |        |         |         |      |    |   |
|----------------|----|--------|---------|---------|------|----|---|
| FAAATGATPIAGR  | +2 | 603.24 | 1204.48 | 1202.64 | 1.84 | 45 | 2 |
| LLVVTDPK       | +2 | 457.78 | 913.54  | 911.54  | 2    | 41 | 3 |
| FTPGTFTNQIAAFR | +2 | 849.94 | 1697.87 | 1697.85 | 0.02 | 60 | 1 |

|       |                                                           |                          |            |               |                            |                                |
|-------|-----------------------------------------------------------|--------------------------|------------|---------------|----------------------------|--------------------------------|
| No.   | Protein                                                   | Matched (SEQUEST MASCOT) | emPAI      | Strategy.Hits | PepMatched(SEQUEST MASCOT) | SpectraMatched(SEQUEST MASCOT) |
| 268.  | IPI00364072                                               | Y Y                      | 0.36       | 1             | 2                          | 3 5                            |
| *Des: | PREDICTED: similar to proteasome 26S non-ATPase subunit 8 |                          |            |               |                            |                                |
|       | SEQUEST:(PepMatched Observed.Hits Coverage)               |                          |            | 2             | 1                          | 7.52%                          |
|       | Seq                                                       | Charge                   | Xcor       | Delta         | Proability                 | PepHits                        |
|       | LVLLELNFLPTTGTK                                           | +2                       |            | 5.002         | 0.619                      | 1.0000 2                       |
|       | VAEFHTELER                                                | +2                       |            | 2.903         | 0.328                      | 0.9974 5                       |
|       | MASCOT:(PepMatched Observed.Hits Coverage)                |                          |            | 2             | 1                          | 7.52%                          |
|       | Seq                                                       | Charge                   | ObservedMS | ExpectedMS    | CalculatedMS               | Pepscore PepHits               |
|       | VAEFHTELER                                                | +2                       | 615.82     | 1229.62       | 1229.60                    | 0.02 50 5                      |
|       | LVLLELNFLPTTGTK                                           | +2                       | 830.00     | 1657.98       | 1657.97                    | 0.01 90 2                      |

|       |                                                                          |                          |       |               |                            |                                |
|-------|--------------------------------------------------------------------------|--------------------------|-------|---------------|----------------------------|--------------------------------|
| No.   | Protein                                                                  | Matched (SEQUEST MASCOT) | emPAI | Strategy.Hits | PepMatched(SEQUEST MASCOT) | SpectraMatched(SEQUEST MASCOT) |
| 269.  | IPI00372166                                                              | Y N                      | 0.06  | 1             | 2                          | 0 3 0                          |
| *Des: | PREDICTED: similar to Traf2 and NCK interacting kinase, splice variant 4 |                          |       |               |                            |                                |
|       | SEQUEST:(PepMatched Observed.Hits Coverage)                              |                          |       | 2             | 1                          | 2.45%                          |
|       | Seq                                                                      | Charge                   | Xcor  | Delta         | Proability                 | PepHits                        |
|       | SQGPALTASQSVHEQPTK                                                       | +2                       |       | 3.668         | 0.564                      | 1.0000 2                       |
|       | NHGQRPATEQLMK                                                            | +2                       |       | 3.284         | 0.364                      | 0.9978 4                       |
|       | MASCOT:(PepMatched Observed.Hits Coverage)                               |                          |       |               |                            |                                |

|       |                                                                |                          |       |               |                            |                                |
|-------|----------------------------------------------------------------|--------------------------|-------|---------------|----------------------------|--------------------------------|
| No.   | Protein                                                        | Matched (SEQUEST MASCOT) | emPAI | Strategy.Hits | PepMatched(SEQUEST MASCOT) | SpectraMatched(SEQUEST MASCOT) |
| 270.  | IPI00196684                                                    | Y N                      | 0.23  | 2             | 2                          | 0 4 0                          |
| *Des: | cAMP-dependent protein kinase type II-alpha regulatory subunit |                          |       |               |                            |                                |
|       | SEQUEST:(PepMatched Observed.Hits Coverage)                    |                          |       | 2             | 2                          | 8.22%                          |
|       | Seq                                                            | Charge                   | Xcor  | Delta         | Proability                 | PepHits                        |
|       | GQYFGELALVTNKPR                                                | +2                       |       | 4.758         | 0.605                      | 1.0000 4                       |
|       | GSFGELALMYNTPR                                                 | +2                       |       | 3.193         | 0.384                      | 0.9975 1                       |
|       | MASCOT:(PepMatched Observed.Hits Coverage)                     |                          |       |               |                            |                                |

|       |                                                                                   |                          |       |               |                            |                                |
|-------|-----------------------------------------------------------------------------------|--------------------------|-------|---------------|----------------------------|--------------------------------|
| No.   | Protein                                                                           | Matched (SEQUEST MASCOT) | emPAI | Strategy.Hits | PepMatched(SEQUEST MASCOT) | SpectraMatched(SEQUEST MASCOT) |
| 271.  | IPI00396910                                                                       | Y Y                      | 0.84  | 4             | 15                         | 14 33 24                       |
| *Des: | ATP synthase, H+ transporting, mitochondrial F1 complex, alpha subunit, isoform 1 |                          |       |               |                            |                                |
|       | SEQUEST:(PepMatched Observed.Hits Coverage)                                       |                          |       | 15            | 10                         | 39.78%                         |
|       | Seq                                                                               | Charge                   | Xcor  | Delta         | Proability                 | PepHits                        |
|       | VVDALGNAIDGK                                                                      | +2                       |       | 4.256         | 0.488                      | 1.0000 6                       |
|       | LELAQYR                                                                           | +2                       | 2.715 | 0.258         | 0.9935                     | 2                              |
|       | PAINVGLSVSR                                                                       | +2                       |       | 2.811         | 0.463                      | 0.9964 3                       |
|       | ILGADTSVDLEETGR                                                                   | +2                       |       | 5.501         | 0.613                      | 1.0000 2                       |
|       | GIRPAINVGLSVSR                                                                    | +3                       |       | 4.015         | 0.347                      | 0.9993 4                       |
|       | AVDSLVPPIGR                                                                       | +2                       |       | 3.201         | 0.408                      | 0.9995 2                       |
|       | TGTAEMSSILEER                                                                     | +2                       |       | 4.260         | 0.452                      | 0.9999 3                       |
|       | HALIYDDLK                                                                         | +2                       |       | 3.198         | 0.607                      | 1.0000 4                       |



Identified Human Platelet Proteins

| Seq                                                     | Charge | ObservedMS | ExpectedMS | CalculatedMS | Pepscore | PepHits |
|---------------------------------------------------------|--------|------------|------------|--------------|----------|---------|
| NVQAEEMVEFSSGLK                                         | +2     | 5.128      | 0.630      | 1.0000       | 4        |         |
| TGAIVDVPVGDPELLGR                                       | +2     | 2.736      | 0.376      | 0.9947       | 1        |         |
| FESAFLSHVVSQHQSLGNIR                                    | +3     | 4.897      | 0.539      | 1.0000       | 2        |         |
| GMSLNLEPDNVGVVVFNDK                                     | +2     | 5.604      | 0.593      | 1.0000       | 2        |         |
| QGQYSPMAIEEQVAVIYAGVR                                   | +2     | 5.078      | 0.512      | 1.0000       | 2        |         |
| LKEIVTNFLAGFE                                           | +2     | 3.778      | 0.526      | 0.9962       | 4        |         |
| EVAFAQFGSDLDAATQQLLSR                                   | +2     | 7.070      | 0.627      | 1.0000       | 4        |         |
| MASCOT:(PepMatched Observed.Hits Coverage) 14 10 37.12% |        |            |            |              |          |         |
| Seq                                                     | Charge | ObservedMS | ExpectedMS | CalculatedMS | Pepscore | PepHits |
| VLSIGDGIAR                                              | +2     | 500.79     | 999.57     | 999.57       | 0        | 62 1    |
| VVDALGNAIDGK                                            | +2     | 586.32     | 1170.63    | 1170.62      | 0.01     | 65 7    |
| GIRPAINVGLSVSR                                          | +3     | 480.91     | 1439.70    | 1437.84      | 1.86     | 50 4    |
| ILGADTSVDLEETGR                                         | +2     | 788.40     | 1574.79    | 1574.78      | 0.01     | 101 3   |
| HALIYDDLSK                                              | +2     | 644.35     | 1286.69    | 1286.69      | 0        | 74 2    |
| TSIAIDTIINQK                                            | +2     | 658.88     | 1315.74    | 1315.73      | 0.01     | 59 1    |
| TGTAEMSSILEER                                           | +2     | 712.34     | 1422.67    | 1422.67      | 0        | 57 1    |
| NVQAEEMVEFSSGLK                                         | +2     | 834.41     | 1666.80    | 1666.79      | 0.01     | 90 3    |
| TGAIVDVPVGDPELLGR                                       | +2     | 805.94     | 1609.87    | 1609.87      | 0        | 57 2    |
| QGQYSPMAIEEQVAVIYAGVR                                   | +3     | 770.40     | 2308.16    | 2308.15      | 0.01     | 47 1    |
| FESAFLSHVVSQHQSLGNIR                                    | +3     | 790.42     | 2368.23    | 2368.23      | 0        | 62 1    |
| EIVTNFLAGFEP                                            | +2     | 668.85     | 1335.68    | 1335.67      | 0.01     | 47 1    |
| LKEIVTNFLAGFEP                                          | +2     | 789.44     | 1576.86    | 1576.85      | 0.01     | 61 3    |
| EVAFAQFGSDLDAATQQLLSR                                   | +3     | 780.06     | 2337.17    | 2337.16      | 0.01     | 55 2    |

No. 272. Protein IPI00339148 Matched (SEQUEST MASCOT) Y Y emPAI Strategy.Hits 4.78 4 4 PepMatched(SEQUEST MASCOT) 33 15 73 SpectraMatched(SEQUEST MASCOT)

\*Des: 60 kDa heat shock protein, mitochondrial precursor

| Seq                                                    | Charge | Xcor       | Delta      | Proability   | PepHits  |         |
|--------------------------------------------------------|--------|------------|------------|--------------|----------|---------|
| SEQUEST:(PepMatched Observed.Hits Coverage) 4 2 13.2%  |        |            |            |              |          |         |
| Seq                                                    | Charge | ObservedMS | ExpectedMS | CalculatedMS | Pepscore | PepHits |
| LVQDVANNTNEEAGDGTATVLR                                 | +3     | 3.817      | 0.404      | 0.9996       | 2        |         |
| ALMLQGVDLLADAVAVTMGPK                                  | +2     | 5.496      | 0.588      | 1.0000       | 13       |         |
| VGEVIVTKDDAMLLK                                        | +2     | 3.214      | 0.374      | 0.9691       | 2        |         |
| NAGVEGSLIVEK                                           | +2     | 3.626      | 0.469      | 0.9995       | 2        |         |
| MASCOT:(PepMatched Observed.Hits Coverage) 33 5 61.74% |        |            |            |              |          |         |
| Seq                                                    | Charge | ObservedMS | ExpectedMS | CalculatedMS | Pepscore | PepHits |
| IGIEIHK                                                | +2     | 393.26     | 784.51     | 784.51       | 0        | 55 2    |
| DDAMLLK                                                | +2     | 403.21     | 804.41     | 804.41       | 0        | 42 1    |
| IPAMTIAK                                               | +2     | 422.75     | 843.49     | 843.49       | 0        | 41 2    |
| VGEVIVTK                                               | +2     | 422.76     | 843.51     | 843.51       | 0        | 73 2    |
| GANPVEIR                                               | +2     | 428.24     | 854.46     | 854.46       | 0        | 44 2    |
| LSDGVAVLK                                              | +2     | 451.27     | 900.53     | 900.53       | 0        | 83 4    |
| VGLQVVAVK                                              | +2     | 457.29     | 912.56     | 911.58       | 0.98     | 79 4    |
| IGIEIKR                                                | +2     | 471.31     | 940.61     | 940.61       | 0        | 58 2    |
| VTDALNATR                                              | +2     | 480.76     | 959.50     | 959.50       | 0        | 77 3    |
| LKVGLQVVAVK                                            | +2     | 577.39     | 1152.76    | 1152.76      | 0        | 65 7    |
| NAGVEGSLIVEK                                           | +2     | 608.33     | 1214.65    | 1214.65      | 0        | 68 4    |
| DRVTDALNATR                                            | +2     | 616.32     | 1230.63    | 1230.63      | 0        | 42 2    |

Identified Human Platelet Proteins

|                              |    |        |         |         |      |     |   |  |  |
|------------------------------|----|--------|---------|---------|------|-----|---|--|--|
| VGGTSDVEVNEK                 | +2 | 617.30 | 1232.59 | 1232.59 | 0    | 73  | 2 |  |  |
| TVIIQSWGSPK                  | +2 | 672.86 | 1343.71 | 1343.71 | 0    | 76  | 4 |  |  |
| GYISPYFINTSK                 | +2 | 695.36 | 1388.70 | 1388.70 | 0    | 71  | 2 |  |  |
| GVMLAVDAVIAELK               | +2 | 714.91 | 1427.81 | 1427.81 | 0    | 59  | 2 |  |  |
| TLNDELEIIEGMK                | +2 | 752.88 | 1503.75 | 1503.75 | 0    | 97  | 2 |  |  |
| GVMLAVDAVIAELKK              | +2 | 778.96 | 1555.90 | 1555.90 | 0    | 118 | 4 |  |  |
| VGEVIVTKDDAMLLK              | +2 | 815.96 | 1629.90 | 1629.90 | 0    | 69  | 4 |  |  |
| RGVMLAVDAVIAELKK             | +3 | 571.67 | 1712.00 | 1712.00 | 0    | 85  | 2 |  |  |
| ISSVQSIVPALEIANAHR           | +2 | 953.03 | 1904.05 | 1904.05 | 0    | 103 | 6 |  |  |
| TLNDELEIIEGMKFDR             | +3 | 641.66 | 1921.94 | 1921.95 | 0    | 63  | 1 |  |  |
| LKVGQLQVVAVKAPGFGDNR         | +3 | 656.72 | 1967.13 | 1967.13 | 0    | 59  | 1 |  |  |
| KISSVQSIVPALEIANAHR          | +3 | 678.39 | 2032.14 | 2032.14 | 0    | 65  | 2 |  |  |
| ALMLQGVDLLADAVAVTMGPK        | +3 | 705.05 | 2112.13 | 2112.13 | 0    | 55  | 2 |  |  |
| IQEITEQLDITTSEYEKEK          | +3 | 766.39 | 2296.13 | 2296.13 | 0    | 55  | 5 |  |  |
| KPLVIAEDVDGEALSTLVLR         | +3 | 789.12 | 2364.32 | 2364.33 | 0    | 60  | 5 |  |  |
| QSKPVTTPEEIAQVATISANGDK      | +3 | 795.42 | 2383.23 | 2383.22 | 0.01 | 47  | 2 |  |  |
| RIQEITEQLDITTSEYEKEK         | +3 | 818.42 | 2452.24 | 2452.23 | 0.01 | 106 | 2 |  |  |
| TALLDAAGVASLLTTAEAVVTEIPK    | +3 | 818.80 | 2453.37 | 2453.36 | 0.01 | 66  | 1 |  |  |
| ILQSSSEVGYDAMLGDFVNMVEK      | +3 | 844.74 | 2531.20 | 2531.19 | 0.01 | 47  | 1 |  |  |
| LVQDVANNTNEEAGDGTTTATVLAR    | +3 | 854.09 | 2559.25 | 2559.24 | 0.01 | 80  | 3 |  |  |
| TALLDAAGVASLLTTAEAVVTEIPKEEK | +3 | 947.52 | 2839.55 | 2839.54 | 0.01 | 78  | 2 |  |  |

No. 273. Protein IPI00210961 Matched (SEQUEST MASCOT) N Y emPAI 0.18 Strategy.Hits 1 PepMatched(SEQUEST MASCOT) 0 SpectraMatched(SEQUEST MASCOT) 2 0 6  
 \*Des: PREDICTED: similar to zinc finger protein Sp5  
 SEQUEST:(PepMatched Observed.Hits Coverage) 2 1 4.01%  
 MASCOT:(PepMatched Observed.Hits Coverage) 2 1 4.01%  
 Seq Charge ObservedMS ExpectedMS CalculatedMS Pepscore PepHits  
 KLGKALIK +2 436.2639 870.5133 869.6062 0.91 53 6  
 FPASAAAAAAAAAALQR +3 510.5858 1528.7357 1527.8157 0.92 43 2

No. 274. Protein IPI00190943 Matched (SEQUEST MASCOT) Y Y emPAI 0.13 Strategy.Hits 1 PepMatched(SEQUEST MASCOT) 2 SpectraMatched(SEQUEST MASCOT) 2 8 45  
 \*Des: Glial fibrillary acidic protein, astrocyte  
 SEQUEST:(PepMatched Observed.Hits Coverage) 2 1 5.25%  
 Seq Charge Xcor Delta Probility PepHits  
 ALAAELNQLR +2 3.270 0.378 0.9998 3  
 LALDIEIATYR +2 3.019 0.546 1.0000 6  
 MASCOT:(PepMatched Observed.Hits Coverage) 2 1 5.25%  
 Seq Charge ObservedMS ExpectedMS CalculatedMS Pepscore PepHits  
 ALAAELNQLR +2 549.8168 1097.6190 1097.6193 0 58 12  
 LALDIEIATYR +2 639.3601 1276.7057 1276.7027 0 58 41

No. 275. Protein IPI00203674 Matched (SEQUEST MASCOT) Y Y emPAI 1.04 Strategy.Hits 2 PepMatched(SEQUEST MASCOT) 5 SpectraMatched(SEQUEST MASCOT) 5 13 18  
 \*Des: PREDICTED: similar to regulator of G-protein signaling RGS18  
 SEQUEST:(PepMatched Observed.Hits Coverage) 5 3 28.87%

Identified Human Platelet Proteins

| No.   | Protein                                              | Matched (SEQUEST MASCOT) | emPAI      | Strategy.Hits | PepMatched(SEQUEST MASCOT) | SpectraMatched(SEQUEST MASCOT) |        |    |   |  |
|-------|------------------------------------------------------|--------------------------|------------|---------------|----------------------------|--------------------------------|--------|----|---|--|
| 276.  | IPI00191748                                          | Y                        | Y          | 0.36          | 1                          | 3                              | 2      | 5  | 2 |  |
| *Des: | Proteasome subunit alpha type 1                      |                          |            |               |                            |                                |        |    |   |  |
|       | SEQUEST:(PepMatched Observed.Hits Coverage)          |                          |            |               | 3                          | 1                              | 15.67% |    |   |  |
|       | Seq                                                  | Charge                   | Xcor       | Delta         | Proability                 | PepHits                        |        |    |   |  |
|       | ETLPAEQDLTTK                                         | +2                       |            | 3.083         | 0.446                      | 0.9988                         | 1      |    |   |  |
|       | IHQIEYAMEAVK                                         | +3                       |            | 3.525         | 0.352                      | 0.9988                         | 4      |    |   |  |
|       | NQYDNDVTWSPQGR                                       | +2                       |            | 3.578         | 0.452                      | 0.9992                         | 1      |    |   |  |
|       | MASCOT:(PepMatched Observed.Hits Coverage)           |                          |            |               | 2                          | 1                              | 10.82% |    |   |  |
|       | Seq                                                  | Charge                   | ObservedMS | ExpectedMS    | CalculatedMS               | Pepscore PepHits               |        |    |   |  |
|       | ETLPAEQDLTTK                                         | +2                       | 673.35     | 1344.68       | 1344.68                    | 0                              | 62     | 1  |   |  |
|       | NQYDNDVTWSPQGR                                       | +2                       | 889.91     | 1777.81       | 1777.80                    | 0.01                           | 50     | 1  |   |  |
| 277.  | IPI00213299                                          | Y                        | Y          | 0.78          | 2                          | 6                              | 3      | 11 | 6 |  |
| *Des: | Microtubule-associated protein RP/EB family member 1 |                          |            |               |                            |                                |        |    |   |  |
|       | SEQUEST:(PepMatched Observed.Hits Coverage)          |                          |            |               | 6                          | 2                              | 30.88% |    |   |  |
|       | Seq                                                  | Charge                   | Xcor       | Delta         | Proability                 | PepHits                        |        |    |   |  |
|       | LEHEYIQNFK                                           | +2                       |            | 2.921         | 0.473                      | 0.9992                         | 2      |    |   |  |
|       | QGQETAVAPSLVAPALSKPK                                 | +3                       |            | 3.870         | 0.553                      | 0.9999                         | 4      |    |   |  |
|       | QGQETAVAPSLVAPALSK                                   | +2                       |            | 5.062         | 0.485                      | 1.0000                         | 1      |    |   |  |
|       | KNPGMGNGDDEAAELMQQVK                                 | +2                       |            | 3.579         | 0.410                      | 0.9885                         | 2      |    |   |  |
|       | HDMLAWINESLQLNLTK                                    | +2                       |            | 5.201         | 0.625                      | 1.0000                         | 4      |    |   |  |
|       | FQDNFEFVQWFK                                         | +2                       | 3.938      | 0.534         | 1.0000                     | 1                              |        |    |   |  |
|       | MASCOT:(PepMatched Observed.Hits Coverage)           |                          |            |               | 3                          | 1                              | 16.54% |    |   |  |
|       | Seq                                                  | Charge                   | ObservedMS | ExpectedMS    | CalculatedMS               | Pepscore PepHits               |        |    |   |  |
|       | LTVEDLEKER                                           | +2                       | 617.31     | 1232.61       | 1230.65                    | 1.96                           | 44     | 6  |   |  |
|       | QGQETAVAPSLVAPALSKPK                                 | +3                       | 664.65     | 1990.93       | 1991.11                    | -0.17                          | 64     | 4  |   |  |
|       | FQDNFEFVQWFK                                         | +2                       | 817.89     | 1633.76       | 1633.76                    | 0                              | 98     | 1  |   |  |
| 278.  | IPI00191749                                          | N                        | Y          | 0.3           | 1                          | 0                              | 2      | 0  | 2 |  |
| *Des: | Proteasome subunit beta type 1                       |                          |            |               |                            |                                |        |    |   |  |

Identified Human Platelet Proteins

| No.   | Protein                                                    | Matched (SEQUEST MASCOT) | emPAI      | Strategy.Hits | PepMatched(SEQUEST MASCOT) | SpectraMatched(SEQUEST MASCOT) |
|-------|------------------------------------------------------------|--------------------------|------------|---------------|----------------------------|--------------------------------|
| 279.  | IPI00201137                                                | Y                        | Y          | 1.29          | 1                          | 6                              |
| *Des: | PREDICTED: similar to nonclathrin coat protein epsilon-COP |                          |            |               |                            |                                |
|       | SEQUEST:(PepMatched Observed.Hits Coverage)                | 6                        | 1          | 37.26%        |                            |                                |
|       | Seq                                                        | Charge                   | Xcor       | Delta         | Proability                 | PepHits                        |
|       | DSIVLELDR                                                  | +2                       |            | 2.863         | 0.273                      | 0.9881 1                       |
|       | YGVVLDEIKPSSAPELQAVR                                       | +3                       |            | 4.808         | 0.513                      | 0.9999 1                       |
|       | WETAEGVLQEALDK                                             | +2                       |            | 4.799         | 0.509                      | 1.0000 2                       |
|       | LQEAYYIFQELADK                                             | +2                       |            | 4.851         | 0.614                      | 1.0000 3                       |
|       | SVDVTNTTFLMAASIYFHDQNPDAALR                                | +3                       |            | 5.547         | 0.551                      | 1.0000 2                       |
|       | MQEQDEDATLTQLATAWVNLAMGGEK                                 | +3                       |            | 6.110         | 0.656                      | 1.0000 3                       |
|       | MASCOT:(PepMatched Observed.Hits Coverage)                 | 5                        | 1          | 28.02%        |                            |                                |
|       | Seq                                                        | Charge                   | ObservedMS | ExpectedMS    | CalculatedMS               | Pepscore PepHits               |
|       | DSIVLELDR                                                  | +2                       | 530.29     | 1058.56       | 1058.56                    | 0 49 1                         |
|       | YGVVLDEIKPSSAPELQAVR                                       | +3                       | 724.40     | 2170.16       | 2170.16                    | 0 47 1                         |
|       | WETAEGVLQEALDK                                             | +2                       | 794.90     | 1587.79       | 1587.78                    | 0.01 79 2                      |
|       | LQEAYYIFQELADK                                             | +2                       | 865.94     | 1729.86       | 1729.86                    | 0 80 3                         |
|       | MQEQDEDATLTQLATAWVNLAMGGEK                                 | +3                       | 950.78     | 2849.33       | 2849.32                    | 0.01 71 2                      |
| 280.  | IPI00555272                                                | N                        | Y          | 0.21          | 1                          | 0                              |
| *Des: | Liver regeneration-related protein LRRG03                  |                          |            |               |                            |                                |
|       | SEQUEST:(PepMatched Observed.Hits Coverage)                | 7                        | 1          | 12.11%        |                            |                                |
|       | MASCOT:(PepMatched Observed.Hits Coverage)                 | 7                        | 1          | 12.11%        |                            |                                |
|       | Seq                                                        | Charge                   | ObservedMS | ExpectedMS    | CalculatedMS               | Pepscore PepHits               |
|       | EGVCPEGSIDSAPVK                                            | +2                       |            | 744.3617      | 1486.7088                  | 1486.6973 0.01 53 5            |
|       | NGDGKEDLIWEILK                                             | +2                       | 815.9247   | 1629.8348     | 1628.8409                  | 0.99 48 8                      |
|       | DGGGDVAFVK                                                 | +2                       | 482.1836   | 962.3527      | 963.4661                   | -1.1 43 7                      |
|       | VAQEHFVK                                                   | +2                       | 457.7788   | 913.5430      | 914.4610                   | -0.91 47 31                    |
|       | HQTVLENTNGK                                                | +2                       | 620.8223   | 1239.6301     | 1239.6207                  | 0.01 68 23                     |
|       | LYLGHSYVTAIR                                               | +2                       | 696.8915   | 1391.7685     | 1391.7561                  | 0.01 47 8                      |
|       | IPSHAVVAR                                                  | +2                       | 475.2852   | 948.5559      | 948.5505                   | 0.01 54 30                     |
| 281.  | IPI00211698                                                | Y                        | Y          | 0.07          | 1                          | 3                              |
| *Des: | Flightless I homolog                                       |                          |            |               |                            |                                |
|       | SEQUEST:(PepMatched Observed.Hits Coverage)                | 3                        | 1          | 4.02%         |                            |                                |
|       | Seq                                                        | Charge                   | Xcor       | Delta         | Proability                 | PepHits                        |
|       | NAEAVLQGGPGISGK                                            | +2                       |            | 3.740         | 0.571                      | 0.9999 2                       |
|       | FVFLLDQGLDIYVWR                                            | +2                       |            | 3.185         | 0.340                      | 0.9948 1                       |
|       | LVTLP EAIHFLTEIEVLDVR                                      | +2                       |            | 5.488         | 0.596                      | 1.0000 5                       |

Identified Human Platelet Proteins

| MASCOT:(PepMatched Observed.Hits Coverage)  |                                                                                                                                                                                                | 2                        | 1          | 2.78%         |                            |                                |   |    |    |
|---------------------------------------------|------------------------------------------------------------------------------------------------------------------------------------------------------------------------------------------------|--------------------------|------------|---------------|----------------------------|--------------------------------|---|----|----|
| Seq                                         | Charge                                                                                                                                                                                         | ObservedMS               | ExpectedMS | CalculatedMS  | Pepscore PepHits           |                                |   |    |    |
| NAEAVLQGPGISGK                              | +2                                                                                                                                                                                             | 670.86                   | 1339.71    | 1339.71       | 0                          | 73                             | 2 |    |    |
| LVTLP EAIHFLTEIEVLDVR                       | +3                                                                                                                                                                                             | 769.77                   | 2306.30    | 2306.29       | 0.01                       | 52                             | 2 |    |    |
| No.                                         | Protein                                                                                                                                                                                        | Matched (SEQUEST MASCOT) | emPAI      | Strategy.Hits | PepMatched(SEQUEST MASCOT) | SpectraMatched(SEQUEST MASCOT) |   |    |    |
| 282.                                        | IPI00359611                                                                                                                                                                                    | Y                        | Y          | 0.29          | 1                          | 3                              | 3 | 5  | 5  |
| *Des:                                       | PREDICTED: similar to 26S proteasome non-ATPase regulatory subunit 7 (26S proteasome regulatory subunit rpn8) (26S proteasome regulatory subunit S12) (Proteasome subunit p40) (Mov34 protein) |                          |            |               |                            |                                |   |    |    |
| SEQUEST:(PepMatched Observed.Hits Coverage) |                                                                                                                                                                                                | 3                        | 1          | 10.83%        |                            |                                |   |    |    |
| Seq                                         | Charge                                                                                                                                                                                         | Xcor                     | Delta      | Proability    | PepHits                    |                                |   |    |    |
| SVVALHNLINNK                                | +2                                                                                                                                                                                             | 2.788                    | 0.322      | 0.9931        | 1                          |                                |   |    |    |
| VVGVLLGSWQK                                 | +2                                                                                                                                                                                             | 3.382                    | 0.108      | 0.9547        | 4                          |                                |   |    |    |
| VVVHPLVLLSVVDHFNR                           | +3                                                                                                                                                                                             | 5.358                    | 0.650      | 1.0000        | 6                          |                                |   |    |    |
| MASCOT:(PepMatched Observed.Hits Coverage)  |                                                                                                                                                                                                | 3                        | 1          | 10.83%        |                            |                                |   |    |    |
| Seq                                         | Charge                                                                                                                                                                                         | ObservedMS               | ExpectedMS | CalculatedMS  | Pepscore PepHits           |                                |   |    |    |
| SVVALHNLINNK                                | +2                                                                                                                                                                                             | 661.39                   | 1320.76    | 1320.75       | 0.01                       | 48                             | 1 |    |    |
| VVGVLLGSWQK                                 | +2                                                                                                                                                                                             | 593.36                   | 1184.70    | 1184.69       | 0.01                       | 55                             | 5 |    |    |
| VVVHPLVLLSVVDHFNR                           | +3                                                                                                                                                                                             | 648.38                   | 1942.13    | 1942.12       | 0.01                       | 71                             | 2 |    |    |
| No.                                         | Protein                                                                                                                                                                                        | Matched (SEQUEST MASCOT) | emPAI      | Strategy.Hits | PepMatched(SEQUEST MASCOT) | SpectraMatched(SEQUEST MASCOT) |   |    |    |
| 283.                                        | IPI00476899                                                                                                                                                                                    | Y                        | Y          | 0.61          | 1                          | 4                              | 3 | 8  | 13 |
| *Des:                                       | PREDICTED: similar to Eukaryotic translation elongation factor 1 beta 2                                                                                                                        |                          |            |               |                            |                                |   |    |    |
| SEQUEST:(PepMatched Observed.Hits Coverage) |                                                                                                                                                                                                | 4                        | 1          | 34.93%        |                            |                                |   |    |    |
| Seq                                         | Charge                                                                                                                                                                                         | Xcor                     | Delta      | Proability    | PepHits                    |                                |   |    |    |
| YGPVSVADTTGSGAADAK                          | +2                                                                                                                                                                                             | 4.805                    | 0.572      | 1.0000        | 3                          |                                |   |    |    |
| SIQADGLVWGSSK                               | +2                                                                                                                                                                                             | 3.829                    | 0.620      | 1.0000        | 3                          |                                |   |    |    |
| SSILLDVKPWDEETDMTK                          | +2                                                                                                                                                                                             | 5.157                    | 0.607      | 1.0000        | 2                          |                                |   |    |    |
| VGTDML EEQITAFEDYVQSMDVAAFNK                | +3                                                                                                                                                                                             | 6.058                    | 0.635      | 1.0000        | 1                          |                                |   |    |    |
| MASCOT:(PepMatched Observed.Hits Coverage)  |                                                                                                                                                                                                | 3                        | 2          | 21.39%        |                            |                                |   |    |    |
| Seq                                         | Charge                                                                                                                                                                                         | ObservedMS               | ExpectedMS | CalculatedMS  | Pepscore PepHits           |                                |   |    |    |
| YGPVSVADTTGSGAADAK                          | +2                                                                                                                                                                                             | 833.90                   | 1665.79    | 1665.78       | 0.01                       | 96                             | 3 |    |    |
| SIQADGLVWGSSK                               | +2                                                                                                                                                                                             | 674.35                   | 1346.68    | 1346.68       | 0                          | 67                             | 3 |    |    |
| TPAGLQVLNDYLADK                             | +2                                                                                                                                                                                             | 809.43                   | 1616.85    | 1616.84       | 0.01                       | 110                            | 3 |    |    |
| No.                                         | Protein                                                                                                                                                                                        | Matched (SEQUEST MASCOT) | emPAI      | Strategy.Hits | PepMatched(SEQUEST MASCOT) | SpectraMatched(SEQUEST MASCOT) |   |    |    |
| 284.                                        | IPI00197703                                                                                                                                                                                    | Y                        | Y          | 1.02          | 3                          | 9                              | 5 | 25 | 10 |
| *Des:                                       | Apolipoprotein A-I precursor                                                                                                                                                                   |                          |            |               |                            |                                |   |    |    |
| SEQUEST:(PepMatched Observed.Hits Coverage) |                                                                                                                                                                                                | 9                        | 5          | 46.96%        |                            |                                |   |    |    |
| Seq                                         | Charge                                                                                                                                                                                         | Xcor                     | Delta      | Proability    | PepHits                    |                                |   |    |    |
| DSGRDYVSQFESSTLGK                           | +2                                                                                                                                                                                             | 4.898                    | 0.663      | 1.0000        | 4                          |                                |   |    |    |
| QLNLNLLDNWDTLGSTVGR                         | +2                                                                                                                                                                                             | 5.527                    | 0.616      | 1.0000        | 8                          |                                |   |    |    |
| LQEQLGPVTQEFWANLEK                          | +2                                                                                                                                                                                             | 4.705                    | 0.524      | 1.0000        | 1                          |                                |   |    |    |
| AKPALDDLGGGLMPVLEAWK                        | +2                                                                                                                                                                                             | 6.302                    | 0.708      | 1.0000        | 12                         |                                |   |    |    |
| LQEQLGPVTQEFWANLEKETDWLR                    | +3                                                                                                                                                                                             | 3.769                    | 0.470      | 1.0000        | 3                          |                                |   |    |    |
| NEMNKDLENVKQK                               | +3                                                                                                                                                                                             | 4.335                    | 0.285      | 0.9996        | 3                          |                                |   |    |    |
| NEMNKDLENVK                                 | +2                                                                                                                                                                                             | 3.152                    | 0.309      | 0.9750        | 1                          |                                |   |    |    |

Identified Human Platelet Proteins

| Seq                                        | Charge | ObservedMS | ExpectedMS | CalculatedMS | PepScore | PepHits |
|--------------------------------------------|--------|------------|------------|--------------|----------|---------|
| VKDFATVYVDAVK                              | +2     | 3.764      | 0.485      | 1.0000       | 2        |         |
| NHPTLIEYHTK                                | +3     | 3.888      | 0.322      | 0.9999       | 9        |         |
| MASCOT:(PepMatched Observed.Hits Coverage) |        | 5          | 2          | 26.89%       |          |         |
| NEMNKDLENVKQK                              | +2     | 795.4005   | 1588.7865  | 1588.7878    | 0        | 64      |
| NEMNKDLENVK                                | +2     | 667.3243   | 1332.6341  | 1332.6343    | 0        | 53      |
| VKDFATVYVDAVK                              | +2     | 728.8602   | 1455.7059  | 1453.7816    | 1.92     | 44      |
| DSGRDYVSQFESSTLGK                          | +2     | 938.4404   | 1874.8663  | 1874.8646    | 0        | 112     |
| LQEQLGPVTQEFWANLEKETDWLR                   | +3     | 977.4918   | 2929.4535  | 2929.4610    | 0        | 61      |

No. 285. Protein IPI00560892 Matched (SEQUEST MASCOT) N Y emPAI Strategy.Hits 0.41 1 PepMatched(SEQUEST MASCOT) 0 SpectraMatched(SEQUEST MASCOT) 8 0 22  
 \*Des: Hydroxyacyl-Coenzyme A dehydrogenase/3-ketoacyl-Coenzyme A thiolase/enoyl-Coenzyme A hydratase (Trifunctional protein), alpha subunit

| Seq                                         | Charge | ObservedMS | ExpectedMS | CalculatedMS | PepScore | PepHits |
|---------------------------------------------|--------|------------|------------|--------------|----------|---------|
| SEQUEST:(PepMatched Observed.Hits Coverage) |        | 8          | 1          | 17.52%       |          |         |
| MASCOT:(PepMatched Observed.Hits Coverage)  |        | 8          | 1          | 17.52%       |          |         |
| DTTASAVAVGLK                                | +2     | 566.81     | 1131.61    | 1131.61      | 0        | 61      |
| TGLEQGNDAGYLAESEK                           | +2     | 891.42     | 1780.82    | 1780.81      | 0.01     | 100     |
| LPAKPEVSSDEDIQYR                            | +3     | 616.31     | 1845.91    | 1845.91      | 0        | 44      |
| MGLVDQLVDPLGPGIK                            | +2     | 826.46     | 1650.91    | 1650.90      | 0.01     | 81      |
| TIEYLEEVAVNFAK                              | +3     | 542.62     | 1624.82    | 1624.83      | 0        | 69      |
| NLNSEIDNILVNLNLR                            | +2     | 813.94     | 1625.88    | 1625.87      | 0.01     | 75      |
| ADMVIEAVFEDLAVK                             | +2     | 825.42     | 1648.83    | 1648.84      | 0        | 90      |
| TVQQLAILGAGLMGAGIAQVSVDK                    | +3     | 780.77     | 2339.28    | 2339.29      | 0        | 43      |

No. 286. Protein IPI00372241 Matched (SEQUEST MASCOT) N Y emPAI Strategy.Hits 0.13 1 PepMatched(SEQUEST MASCOT) 0 SpectraMatched(SEQUEST MASCOT) 6 0 7  
 \*Des: PREDICTED: similar to RIKEN cDNA 1200009I06

| Seq                                         | Charge | ObservedMS | ExpectedMS | CalculatedMS | PepScore | PepHits |
|---------------------------------------------|--------|------------|------------|--------------|----------|---------|
| SEQUEST:(PepMatched Observed.Hits Coverage) |        | 6          | 1          | 11.85%       |          |         |
| MASCOT:(PepMatched Observed.Hits Coverage)  |        | 6          | 1          | 11.85%       |          |         |
| VTDGVSQQAATGVEAEDLER                        | +3     | 692.34     | 2073.98    | 2073.98      | 0        | 41      |
| LESDYTSFLETK                                | +2     | 716.85     | 1431.68    | 1431.68      | 0        | 62      |
| DHILAILALR                                  | +2     | 567.85     | 1133.69    | 1133.69      | 0        | 45      |
| RDHILAILALR                                 | +3     | 430.94     | 1289.79    | 1289.79      | 0        | 42      |
| HLLQIAQQDIQPLFK                             | +2     | 896.51     | 1791.01    | 1791.00      | 0.01     | 88      |
| VIPGAAEGASDLAQLLAELGGVVR                    | +3     | 769.43     | 2305.27    | 2305.26      | 0.01     | 48      |

No. 287. Protein IPI00391695 Matched (SEQUEST MASCOT) Y Y emPAI Strategy.Hits 0.17 1 PepMatched(SEQUEST MASCOT) 3 SpectraMatched(SEQUEST MASCOT) 4 6 5  
 \*Des: PREDICTED: similar to Programmed cell death 6 interacting protein (ALG-2 interacting protein X) (ALG-2 interacting protein 1) (E2F1-inducible protein) (Eig2)

| Seq                                         | Charge | Xcor  | Delta | Probability | PepHits |
|---------------------------------------------|--------|-------|-------|-------------|---------|
| SEQUEST:(PepMatched Observed.Hits Coverage) |        | 3     | 1     | 9.19%       |         |
| ATLVKPTPVNVPISQK                            | +2     | 3.744 | 0.520 | 0.9999      | 2       |
| MVPVSVQQSLAVFSQR                            | +2     | 4.096 | 0.522 | 0.9999      | 3       |

Identified Human Platelet Proteins

|                                            |                                                                                  |                            |             |                 |                              |                                  |          |         |
|--------------------------------------------|----------------------------------------------------------------------------------|----------------------------|-------------|-----------------|------------------------------|----------------------------------|----------|---------|
|                                            | EPTVDISPDTVGTLSLIMLAQAQEVFFLK                                                    | +3                         | 6.318       | 0.609           | 1.0000                       | 1                                |          |         |
| MASCOT:(PepMatched Observed.Hits Coverage) |                                                                                  | 4                          | 1           | 8.62%           |                              |                                  |          |         |
|                                            | Seq Charge ObservedMS                                                            |                            | ExpectedMS  | CalculatedMS    |                              |                                  | PepScore | PepHits |
|                                            | ATLVKPTPVNVPISQK                                                                 | +2                         | 846.51      | 1691.00         | 1691.00                      | 0                                | 61       | 2       |
|                                            | LALASLGYEK                                                                       | +2                         | 532.80      | 1063.59         | 1063.59                      | 0                                | 45       | 2       |
|                                            | LANQAADYFGDAFK                                                                   | +2                         | 766.73      | 1531.45         | 1529.71                      | 1.74                             | 61       | 1       |
|                                            | MVPVSVQQSLAVFSQR                                                                 | +2                         | 888.48      | 1774.94         | 1774.94                      | 0                                | 85       | 3       |
| No. 288.                                   | Protein IPI00369169                                                              | Matched (SEQUEST MASCOT) Y | emPAI 0.06  | Strategy.Hits 2 | PepMatched(SEQUEST MASCOT) 2 | SpectraMatched(SEQUEST MASCOT) 2 |          |         |
| *Des:                                      | PREDICTED: similar to FNBP1-like                                                 |                            |             |                 |                              |                                  |          |         |
|                                            | SEQUEST:(PepMatched Observed.Hits Coverage)                                      | 2                          | 1           | 3.88%           |                              |                                  |          |         |
|                                            | Seq Charge Xcor Delta                                                            |                            | Probability | PepHits         |                              |                                  |          |         |
|                                            | LAETMNNIDR                                                                       | +2                         | 3.172       | 0.315           | 0.9969                       | 1                                |          |         |
|                                            | MKDVEKPNPQMGDPGSLQPK                                                             | +3                         | 4.741       | 0.436           | 1.0000                       | 2                                |          |         |
| MASCOT:(PepMatched Observed.Hits Coverage) |                                                                                  | 2                          | 1           | 4.37%           |                              |                                  |          |         |
|                                            | Seq Charge ObservedMS                                                            |                            | ExpectedMS  | CalculatedMS    |                              |                                  | PepScore | PepHits |
|                                            | ESPEGSYTDDANQEV                                                                  | +2                         | 898.9019    | 1795.7893       | 1795.7496                    | 0.04                             | 76       | 1       |
|                                            | EGEVLYIIEEDKGDGWTR                                                               | +3                         | 703.6887    | 2108.0443       | 2108.0061                    | 0.04                             | 37       | 2       |
| No. 289.                                   | Protein IPI00373045                                                              | Matched (SEQUEST MASCOT) Y | emPAI 0.22  | Strategy.Hits 1 | PepMatched(SEQUEST MASCOT) 3 | SpectraMatched(SEQUEST MASCOT) 2 | 4        | 4       |
| *Des:                                      | Eukaryotic translation initiation factor 4B                                      |                            |             |                 |                              |                                  |          |         |
|                                            | SEQUEST:(PepMatched Observed.Hits Coverage)                                      | 3                          | 2           | 8.68%           |                              |                                  |          |         |
|                                            | Seq Charge Xcor Delta                                                            |                            | Probability | PepHits         |                              |                                  |          |         |
|                                            | STPKEDDSSASTSQSSR                                                                | +3                         | 3.471       | 0.507           | 1.0000                       | 2                                |          |         |
|                                            | SRTGSESSQTGTSATSGR                                                               | +3                         | 3.296       | 0.413           | 0.9999                       | 1                                |          |         |
|                                            | AASIFGGAKPVDTAAR                                                                 | +2                         | 3.239       | 0.441           | 0.9989                       | 1                                |          |         |
| MASCOT:(PepMatched Observed.Hits Coverage) |                                                                                  | 2                          | 1           | 5.62%           |                              |                                  |          |         |
|                                            | Seq Charge ObservedMS                                                            |                            | ExpectedMS  | CalculatedMS    |                              |                                  | PepScore | PepHits |
|                                            | TGSESSQTGTSATSGR                                                                 | +2                         | 757.3401    | 1512.6656       | 1512.6652                    | 0                                | 80       | 1       |
|                                            | STPKEDDSSASTSQSSR                                                                | +2                         | 885.3943    | 1768.7740       | 1768.7711                    | 0                                | 70       | 4       |
| No. 290.                                   | Protein IPI00363423                                                              | Matched (SEQUEST MASCOT) N | emPAI 0.03  | Strategy.Hits 1 | PepMatched(SEQUEST MASCOT) 0 | SpectraMatched(SEQUEST MASCOT) 2 | 0        | 5       |
| *Des:                                      | PREDICTED: similar to colonic and hepatic tumor over-expressed protein isoform a |                            |             |                 |                              |                                  |          |         |
|                                            | SEQUEST:(PepMatched Observed.Hits Coverage)                                      | 2                          | 1           | 1.42%           |                              |                                  |          |         |
| MASCOT:(PepMatched Observed.Hits Coverage) |                                                                                  | 2                          | 1           | 1.42%           |                              |                                  |          |         |
|                                            | Seq Charge ObservedMS                                                            |                            | ExpectedMS  | CalculatedMS    |                              |                                  | PepScore | PepHits |
|                                            | MQQQSPPAPTR                                                                      | +2                         | 585.2941    | 1168.5736       | 1168.5659                    | 0.01                             | 69       | 6       |
|                                            | AVSKPMGGSAPAK                                                                    | +2                         | 600.8271    | 1199.6397       | 1199.6332                    | 0.01                             | 42       | 1       |
| No. 291.                                   | Protein IPI00206222                                                              | Matched (SEQUEST MASCOT) Y | emPAI 0.35  | Strategy.Hits 1 | PepMatched(SEQUEST MASCOT) 2 | SpectraMatched(SEQUEST MASCOT) 2 | 7        | 4       |
| *Des:                                      | 29 kDa protein                                                                   |                            |             |                 |                              |                                  |          |         |
|                                            | SEQUEST:(PepMatched Observed.Hits Coverage)                                      | 2                          | 1           | 12.08%          |                              |                                  |          |         |
|                                            | Seq Charge Xcor Delta                                                            |                            | Probability | PepHits         |                              |                                  |          |         |

Identified Human Platelet Proteins

|          |                                                        |                          |            |               |                            |                                |     |          |         |
|----------|--------------------------------------------------------|--------------------------|------------|---------------|----------------------------|--------------------------------|-----|----------|---------|
|          | AAELIANSLATAGDGLIELR                                   | +2                       | 5.767      | 0.563         | 1.0000                     | 7                              |     |          |         |
|          | VLPSITTEILK                                            | +2                       | 2.764      | 0.462         | 0.9994                     | 4                              |     |          |         |
|          | MASCOT:(PepMatched Observed.Hits Coverage)             |                          | 2          | 1             | 15.01%                     |                                |     |          |         |
|          | Seq                                                    | Charge                   | ObservedMS | ExpectedMS    | CalculatedMS               |                                |     | PepScore | PepHits |
|          | FNAGELITQR                                             | +2                       | 575.31     | 1148.60       | 1147.60                    | 1                              | 42  | 5        |         |
|          | AAELIANSLATAGDGLIELRKLEAAQLSR                          | +3                       | 999.56     | 2995.65       | 2993.65                    | 2                              | 69  | 2        |         |
| No. 292. | Protein                                                | Matched (SEQUEST MASCOT) | emPAI      | Strategy.Hits | PepMatched(SEQUEST MASCOT) | SpectraMatched(SEQUEST MASCOT) |     |          |         |
|          | IPI00361821                                            | Y                        | Y          | 0.51          | 1                          | 2                              | 3   | 3        | 6       |
| *Des:    | V-crk sarcoma virus CT10 oncogene homolog (Avian)-like |                          |            |               |                            |                                |     |          |         |
|          | SEQUEST:(PepMatched Observed.Hits Coverage)            |                          | 2          | 1             | 9.06%                      |                                |     |          |         |
|          | Seq                                                    | Charge                   | Xcor       | Delta         | Probability                | PepHits                        |     |          |         |
|          | VSHYIINSLPNR                                           | +2                       | 2.959      | 0.310         | 0.9942                     | 3                              |     |          |         |
|          | MNINGQWEGEVNGR                                         | +2                       | 3.977      | 0.408         | 0.9996                     | 1                              |     |          |         |
|          | MASCOT:(PepMatched Observed.Hits Coverage)             |                          | 3          | 1             | 13.26%                     |                                |     |          |         |
|          | Seq                                                    | Charge                   | ObservedMS | ExpectedMS    | CalculatedMS               |                                |     | PepScore | PepHits |
|          | VSHYIINSLPNR                                           | +2                       | 706.89     | 1411.76       | 1411.76                    | 0                              | 53  | 6        |         |
|          | MNINGQWEGEVNGR                                         | +2                       | 802.37     | 1602.73       | 1602.72                    | 0.01                           | 51  | 1        |         |
|          | TALALEVGDIVK                                           | +2                       | 615.31     | 1228.60       | 1227.71                    | 0.89                           | 51  | 4        |         |
| No. 293. | Protein                                                | Matched (SEQUEST MASCOT) | emPAI      | Strategy.Hits | PepMatched(SEQUEST MASCOT) | SpectraMatched(SEQUEST MASCOT) |     |          |         |
|          | IPI00231229                                            | Y                        | Y          | 0.56          | 2                          | 5                              | 2   | 18       | 8       |
| *Des:    | Glutathione S-transferase P                            |                          |            |               |                            |                                |     |          |         |
|          | SEQUEST:(PepMatched Observed.Hits Coverage)            |                          | 5          | 6             | 38.02%                     |                                |     |          |         |
|          | Seq                                                    | Charge                   | Xcor       | Delta         | Probability                | PepHits                        |     |          |         |
|          | EAALVDMVNDGVEDLR                                       | +2                       | 5.392      | 0.554         | 1.0000                     | 3                              |     |          |         |
|          | SLGLYGKDQK                                             | +2                       | 2.892      | 0.375         | 0.9843                     | 3                              |     |          |         |
|          | PPYTIVYFPVR                                            | +2                       | 3.707      | 0.529         | 1.0000                     | 13                             |     |          |         |
|          | AFLSSPDHLNRPINGNGKQ                                    | +3                       | 3.452      | 0.392         | 0.9965                     | 5                              |     |          |         |
|          | ALPGHLKPFETLLSQNQGGK                                   | +3                       | 4.692      | 0.373         | 1.0000                     | 6                              |     |          |         |
|          | MASCOT:(PepMatched Observed.Hits Coverage)             |                          | 2          | 4             | 17.84%                     |                                |     |          |         |
|          | Seq                                                    | Charge                   | ObservedMS | ExpectedMS    | CalculatedMS               |                                |     | PepScore | PepHits |
|          | EAALVDMVNDGVEDLR                                       | +2                       | 873.4278   | 1744.8410     | 1744.8301                  | 0.01                           | 112 | 5        |         |
|          | ALPGHLKPFETLLSQNQGGK                                   | +2                       | 1068.0935  | 2134.1725     | 2134.1534                  | 0.02                           | 67  | 4        |         |
| No. 294. | Protein                                                | Matched (SEQUEST MASCOT) | emPAI      | Strategy.Hits | PepMatched(SEQUEST MASCOT) | SpectraMatched(SEQUEST MASCOT) |     |          |         |
|          | IPI00198369                                            | N                        | Y          | 0.64          | 1                          | 0                              | 5   | 0        | 7       |
| *Des:    | Sorting nexin 1                                        |                          |            |               |                            |                                |     |          |         |
|          | SEQUEST:(PepMatched Observed.Hits Coverage)            |                          | 5          | 1             | 13.69%                     |                                |     |          |         |
|          | MASCOT:(PepMatched Observed.Hits Coverage)             |                          | 5          | 1             | 13.69%                     |                                |     |          |         |
|          | Seq                                                    | Charge                   | ObservedMS | ExpectedMS    | CalculatedMS               |                                |     | PepScore | PepHits |
|          | KLHAVVETLVNHR                                          | +3                       | 505.96     | 1514.87       | 1514.87                    | 0                              | 49  | 2        |         |
|          | AVGTQALSGAGLLK                                         | +2                       | 643.38     | 1284.74       | 1284.74                    | 0                              | 61  | 2        |         |
|          | SLAMLGSSSEDNTALSR                                      | +2                       | 826.40     | 1650.79       | 1650.79                    | 0                              | 86  | 1        |         |
|          | YLETLLHSQQQLAK                                         | +2                       | 836.46     | 1670.90       | 1670.90                    | 0                              | 63  | 1        |         |
|          | ELALNTALFAK                                            | +2                       | 595.84     | 1189.67       | 1189.67                    | 0                              | 52  | 2        |         |



Identified Human Platelet Proteins

| No.   | Protein                                     | Matched (SEQUEST MASCOT) | emPAI      | Strategy.Hits | PepMatched(SEQUEST MASCOT) | SpectraMatched(SEQUEST MASCOT) |
|-------|---------------------------------------------|--------------------------|------------|---------------|----------------------------|--------------------------------|
| 295.  | IPI00206224                                 | Y Y                      | 0.22       | 1             | 2 3 2                      | 4                              |
| *Des: | Aspartyl-tRNA synthetase                    |                          |            |               |                            |                                |
|       | SEQUEST:(PepMatched Observed.Hits Coverage) |                          |            | 2             | 1                          | 6.27%                          |
|       | Seq                                         | Charge Xcor              | Delta      | Proability    | PepHits                    |                                |
|       | LPLQLDDAIRPEVEGEEDGR                        | +3                       | 3.594      | 0.427         | 0.9995                     | 1                              |
|       | IYVISLAEPR                                  | +2                       | 3.098      | 0.306         | 0.9969                     | 2                              |
|       | MASCOT:(PepMatched Observed.Hits Coverage)  |                          |            | 3             | 1                          | 7.64%                          |
|       | Seq                                         | Charge ObservedMS        | ExpectedMS | CalculatedMS  | Pepscore PepHits           |                                |
|       | FGAPPHAGGGIGLER                             | +3                       | 479.26     | 1434.75       | 1434.74                    | 0.01 42 2                      |
|       | IYVISLAEPR                                  | +2                       | 580.84     | 1159.67       | 1159.66                    | 0.01 46 2                      |
|       | ESIIDVEGIVR                                 | +2                       | 615.34     | 1228.67       | 1228.67                    | 0 50 1                         |
| 296.  | IPI00363427                                 | Y Y                      | 0.43       | 2             | 9 5 13                     | 9                              |
| *Des: | PREDICTED: similar to Arhgap1 protein       |                          |            |               |                            |                                |
|       | SEQUEST:(PepMatched Observed.Hits Coverage) |                          |            | 9             | 3                          | 32.62%                         |
|       | Seq                                         | Charge Xcor              | Delta      | Proability    | PepHits                    |                                |
|       | LEQLGIPR                                    | +2                       | 2.726      | 0.264         | 0.9916                     | 2                              |
|       | EKNPNQEPIPIVLR                              | +2                       | 4.343      | 0.501         | 0.9993                     | 1                              |
|       | VEVTQQVLQTLPEENYR                           | +2                       | 4.408      | 0.511         | 1.0000                     | 2                              |
|       | FLLDHQGELFPSTDAQG                           | +2                       | 3.652      | 0.422         | 0.9980                     | 2                              |
|       | IFYVNYLSELSEHVK                             | +2                       | 3.904      | 0.489         | 0.9999                     | 2                              |
|       | YNMGLPVDFDQYNELHLPVILK                      | +3                       |            | 3.350         | 0.453                      | 0.9995 2                       |
|       | VLHFLTAFLVQVSAHSYQNR                        | +3                       | 3.554      | 0.457         | 0.9997                     | 2                              |
|       | MNNTNLAVVFGPNLLWAK                          | +2                       | 4.128      | 0.616         | 1.0000                     | 2                              |
|       | TLLILFKPLISFK                               | +3                       | 3.292      | 0.445         | 0.9997                     | 2                              |
|       | MASCOT:(PepMatched Observed.Hits Coverage)  |                          |            | 5             | 2                          | 16.52%                         |
|       | Seq                                         | Charge ObservedMS        | ExpectedMS | CalculatedMS  | Pepscore PepHits           |                                |
|       | LEQLGIPR                                    | +2                       | 463.28     | 924.54        | 924.54                     | 0 48 3                         |
|       | EKNPNQEPIPIVLR                              | +2                       | 823.97     | 1645.93       | 1645.92                    | 0.01 61 1                      |
|       | FLLDHQGELFPSTDAQGV                          | +2                       | 987.49     | 1972.97       | 1972.95                    | 0.02 97 2                      |
|       | TLLILFKPLISFK                               | +3                       | 511.67     | 1531.98       | 1531.97                    | 0.01 44 2                      |
|       | VLHFLTAFLVQVSAHSYQNR                        | +3                       | 777.42     | 2329.24       | 2329.23                    | 0.01 42 1                      |
| 297.  | IPI00197568                                 | Y Y                      | 0.21       | 1             | 8 2 11                     | 9                              |
| *Des: | Rab GDP dissociation inhibitor beta-2       |                          |            |               |                            |                                |
|       | SEQUEST:(PepMatched Observed.Hits Coverage) |                          |            | 8             | 1                          | 29.35%                         |
|       | Seq                                         | Charge Xcor              | Delta      | Proability    | PepHits                    |                                |
|       | YIAIVSTTVETK                                | +2                       | 3.267      | 0.443         | 0.9996                     | 1                              |
|       | DLGTDSQIFISR                                | +2                       | 3.085      | 0.444         | 0.9995                     | 2                              |
|       | PALELLEPIEQK                                | +2                       | 4.056      | 0.466         | 0.9997                     | 1                              |
|       | VLHMDQNPYYGGESASITPLEDLYK                   | +3                       |            | 5.064         | 0.468                      | 0.9999 1                       |
|       | EIRPALELLEPIEQK                             | +3                       | 3.288      | 0.233         | 0.9878                     | 2                              |
|       | LSAIYGGTYMLNKPIEIIIVQNGK                    | +3                       |            | 3.761         | 0.547                      | 0.9999 1                       |
|       | FDLGQDVIDFTGHSLALYR                         | +2                       | 4.619      | 0.558         | 1.0000                     | 2                              |

| Identified Human Platelet Proteins         |                                               |                          |            |               |                            |                                |     |          |         |
|--------------------------------------------|-----------------------------------------------|--------------------------|------------|---------------|----------------------------|--------------------------------|-----|----------|---------|
|                                            | VPSTEAEALASSLMGLFEK                           | +2                       | 5.784      | 0.622         | 1.0000                     | 2                              |     |          |         |
| MASCOT:(PepMatched Observed.Hits Coverage) | 2                                             | 1                        | 6.62%      |               |                            |                                |     |          |         |
|                                            | Seq                                           | Charge                   | ObservedMS | ExpectedMS    | CalculatedMS               |                                |     | PepScore | PepHits |
|                                            | MLLFTEVTR                                     | +2                       | 555.81     | 1109.60       | 1108.60                    | 1                              | 47  | 6        |         |
|                                            | VPSTEAEALASSLMGLFEK                           | +3                       | 660.67     | 1979.00       | 1978.99                    | 0.01                           | 51  | 6        |         |
| No.                                        | Protein                                       | Matched (SEQUEST MASCOT) | emPAI      | Strategy.Hits | PepMatched(SEQUEST MASCOT) | SpectraMatched(SEQUEST MASCOT) |     |          |         |
| 298.                                       | IPI00207891                                   | Y                        | N          | 0.72          | 1                          | 5                              | 0   | 9        | 0       |
| *Des:                                      | 31 kDa protein                                |                          |            |               |                            |                                |     |          |         |
|                                            | SEQUEST:(PepMatched Observed.Hits Coverage)   | 5                        | 2          | 32.52%        |                            |                                |     |          |         |
|                                            | Seq                                           | Charge                   | Xcor       | Delta         | Probability                | PepHits                        |     |          |         |
|                                            | AEDFQLHTHVNDGTEFGGSIYQR                       | +3                       | 6.551      | 0.663         | 1.0000                     | 3                              |     |          |         |
|                                            | VNNASLIGLGYTQSLRPGVK                          | +2                       | 4.967      | 0.555         | 1.0000                     | 4                              |     |          |         |
|                                            | IETSINLAWTAGSNNTR                             | +2                       | 5.204      | 0.643         | 1.0000                     | 3                              |     |          |         |
|                                            | WNTDNTLGTEISWENK                              | +2                       | 4.786      | 0.581         | 1.0000                     | 1                              |     |          |         |
|                                            | LTVDTIFVPNTGK                                 | +2                       | 3.867      | 0.585         | 1.0000                     | 2                              |     |          |         |
|                                            | MASCOT:(PepMatched Observed.Hits Coverage)    |                          |            |               |                            |                                |     |          |         |
| No.                                        | Protein                                       | Matched (SEQUEST MASCOT) | emPAI      | Strategy.Hits | PepMatched(SEQUEST MASCOT) | SpectraMatched(SEQUEST MASCOT) |     |          |         |
| 299.                                       | IPI00207964                                   | Y                        | Y          | 0.3           | 1                          | 2                              | 2   | 5        | 6       |
| *Des:                                      | Splice Isoform 4 of Tropomyosin 1 alpha chain |                          |            |               |                            |                                |     |          |         |
|                                            | SEQUEST:(PepMatched Observed.Hits Coverage)   | 2                        | 2          | 10.15%        |                            |                                |     |          |         |
|                                            | Seq                                           | Charge                   | Xcor       | Delta         | Probability                | PepHits                        |     |          |         |
|                                            | ETAADVASLNR                                   | +2                       | 3.812      | 0.417         | 0.9999                     | 4                              |     |          |         |
|                                            | SLQEQADAAEER                                  | +2                       | 4.383      | 0.338         | 0.9998                     | 2                              |     |          |         |
|                                            | MASCOT:(PepMatched Observed.Hits Coverage)    | 2                        | 1          | 10.15%        |                            |                                |     |          |         |
|                                            | Seq                                           | Charge                   | ObservedMS | ExpectedMS    | CalculatedMS               |                                |     | PepScore | PepHits |
|                                            | ETAADVASLNR                                   | +2                       | 638.32     | 1274.62       | 1274.61                    | 0.01                           | 60  | 3        |         |
|                                            | SLQEQADAAEER                                  | +2                       | 673.82     | 1345.62       | 1345.61                    | 0.01                           | 71  | 3        |         |
| No.                                        | Protein                                       | Matched (SEQUEST MASCOT) | emPAI      | Strategy.Hits | PepMatched(SEQUEST MASCOT) | SpectraMatched(SEQUEST MASCOT) |     |          |         |
| 300.                                       | IPI00212647                                   | Y                        | Y          | 0.37          | 3                          | 5                              | 6   | 14       | 146     |
| *Des:                                      | Glyceraldehyde-3-phosphate dehydrogenase      |                          |            |               |                            |                                |     |          |         |
|                                            | SEQUEST:(PepMatched Observed.Hits Coverage)   | 5                        | 6          | 31.26%        |                            |                                |     |          |         |
|                                            | Seq                                           | Charge                   | Xcor       | Delta         | Probability                | PepHits                        |     |          |         |
|                                            | LISWYDNEYGYSNR                                | +2                       | 2.821      | 0.480         | 0.9813                     | 1                              |     |          |         |
|                                            | LIVINGKPIITIFQER                              | +3                       | 3.383      | 0.633         | 0.9998                     | 1                              |     |          |         |
|                                            | WGDAGAEYVVESTGVFTTMEK                         | +2                       | 6.487      | 0.855         | 1.0000                     | 2                              |     |          |         |
|                                            | VIHDNFGIVEGLMTTVHAIATATQK                     | +3                       | 5.788      | 0.747         | 1.0000                     | 3                              |     |          |         |
|                                            | VDIVAINDPFIDLNYMVYMFQYDSTHGK                  | +3                       | 4.330      | 0.587         | 0.9996                     | 1                              |     |          |         |
|                                            | MASCOT:(PepMatched Observed.Hits Coverage)    | 6                        | 8          | 35.98%        |                            |                                |     |          |         |
|                                            | Seq                                           | Charge                   | ObservedMS | ExpectedMS    | CalculatedMS               |                                |     | PepScore | PepHits |
|                                            | VDIVAINDPFIDLNYMVYMFQYDSTHGK                  | +3                       | 1103.5455  | 3307.6148     | 3307.5569                  | 0.06                           | 69  | 2        |         |
|                                            | WGDAGAEYVVESTGVFTTMEK                         | +2                       | 1139.0431  | 2276.0716     | 2276.0306                  | 0.04                           | 136 | 14       |         |
|                                            | VPTPNVSVVDLTCR                                | +2                       | 750.4088   | 1498.8030     | 1498.7813                  | 0.02                           | 82  | 7        |         |
|                                            | GAAQNIIPASTGAAK                               | +2                       | 685.3886   | 1368.7625     | 1368.7361                  | 0.03                           | 49  | 9        |         |
|                                            | LISWYDNEYGYSNR                                | +2                       | 890.4166   | 1778.8186     | 1778.7900                  | 0.03                           | 79  | 14       |         |

Identified Human Platelet Proteins

VIHDNFGIVEGLMTTVHAITATQK +3 865.8028 2594.3866 2594.3526 0.03 64 14

No. 301. Protein IPI00194087 Matched (SEQUEST MASCOT) N Y emPAI 0.3 Strategy.Hits 1 PepMatched(SEQUEST MASCOT) 0 SpectraMatched(SEQUEST MASCOT) 35

\*Des: Actin, alpha cardiac

SEQUEST:(PepMatched Observed.Hits Coverage)

MASCOT:(PepMatched Observed.Hits Coverage) 3 1 11.71%

| Seq                    | Charge | ObservedMS | ExpectedMS | CalculatedMS | Pepscore | PepHits |
|------------------------|--------|------------|------------|--------------|----------|---------|
| YPIEHGIITNWDDMEK       | +2     | 980.9607   | 1959.9068  | 1959.9036    | 0        | 61      |
| VAPEEHPTLLTEAPLNPKANR  | +3     | 767.0573   | 2298.1499  | 2296.2175    | 1.93     | 51      |
| GILTLKYPIEHGIITNWDDMEK | +3     | 862.7823   | 2585.3250  | 2585.3199    | 0.01     | 54      |

No. 302. Protein IPI00191681 Matched (SEQUEST MASCOT) Y Y emPAI 0.2 Strategy.Hits 2 PepMatched(SEQUEST MASCOT) 3 SpectraMatched(SEQUEST MASCOT) 4

\*Des: Integrin beta-1 precursor

SEQUEST:(PepMatched Observed.Hits Coverage) 3 2 5.53%

| Seq                   | Charge | Xcor  | Delta | Probability | PepHits |
|-----------------------|--------|-------|-------|-------------|---------|
| LPDGVVTINYK           | +2     | 3.215 | 0.455 | 0.9996      | 3       |
| SLGTDLMNEMR           | +2     | 2.984 | 0.472 | 0.9995      | 1       |
| LSENNIQTIFAVTEEFQPVYK | +3     | 4.478 | 0.531 | 1.0000      | 2       |

MASCOT:(PepMatched Observed.Hits Coverage) 4 1 7.13%

| Seq                   | Charge | ObservedMS | ExpectedMS | CalculatedMS | Pepscore | PepHits |
|-----------------------|--------|------------|------------|--------------|----------|---------|
| LPDGVVTINYK           | +2     | 560.22     | 1118.43    | 1118.60      | -0.16    | 42      |
| SLGTDLMNEMR           | +2     | 633.80     | 1265.58    | 1265.57      | 0.01     | 53      |
| GEFFNELVGQQR          | +2     | 712.36     | 1422.70    | 1422.69      | 0.01     | 44      |
| LSENNIQTIFAVTEEFQPVYK | +3     | 824.09     | 2469.24    | 2469.24      | 0        | 45      |

No. 303. Protein IPI00200410 Matched (SEQUEST MASCOT) Y Y emPAI 1.12 Strategy.Hits 1 PepMatched(SEQUEST MASCOT) 6 SpectraMatched(SEQUEST MASCOT) 8

\*Des: PREDICTED: similar to EF hand domain containing 2

SEQUEST:(PepMatched Observed.Hits Coverage) 6 2 27.15%

| Seq               | Charge | Xcor  | Delta | Probability | PepHits |
|-------------------|--------|-------|-------|-------------|---------|
| LSEIDVSTEGVK      | +2     | 3.929 | 0.484 | 0.9998      | 3       |
| AAAGELQEDSGLHVLAR | +2     | 4.124 | 0.554 | 1.0000      | 2       |
| SMIQEVDEDFDSK     | +2     | 3.646 | 0.379 | 0.9985      | 1       |
| DGFIDLMEK         | +2     | 2.918 | 0.408 | 0.9981      | 1       |
| FEEIKAEQEER       | +2     | 3.848 | 0.502 | 0.9976      | 2       |
| ADLNQGIGEPQSPSR   | +2     | 3.842 | 0.445 | 0.9994      | 1       |

MASCOT:(PepMatched Observed.Hits Coverage) 6 3 27.47%

| Seq               | Charge | ObservedMS | ExpectedMS | CalculatedMS | Pepscore | PepHits |
|-------------------|--------|------------|------------|--------------|----------|---------|
| LGAPQTHLGLK       | +2     | 567.84     | 1133.66    | 1133.66      | 0        | 41      |
| LSEIDVSTEGVK      | +2     | 638.84     | 1275.66    | 1275.66      | 0        | 72      |
| FEEIKAEQEER       | +2     | 768.86     | 1535.71    | 1535.71      | 0        | 64      |
| ADLNQGIGEPQSPSR   | +2     | 784.89     | 1567.77    | 1567.76      | 0.01     | 45      |
| AAAGELQEDSGLHVLAR | +2     | 868.95     | 1735.89    | 1735.89      | 0        | 60      |
| SMIQEVDEDFDSK     | +2     | 771.84     | 1541.66    | 1541.66      | 0        | 67      |

**Identified Human Platelet Proteins**

|            |                |                                 |              |                      |                                   |                                       |
|------------|----------------|---------------------------------|--------------|----------------------|-----------------------------------|---------------------------------------|
| <b>No.</b> | <b>Protein</b> | <b>Matched (SEQUEST MASCOT)</b> | <b>emPAI</b> | <b>Strategy.Hits</b> | <b>PepMatched(SEQUEST MASCOT)</b> | <b>SpectraMatched(SEQUEST MASCOT)</b> |
| 304.       | IPI00559637    | N Y                             | 0.75         | 1                    | 0 3 0                             | 5                                     |

\*Des:

Protein

SEQUEST:(PepMatched Observed.Hits Coverage) 3 1 29.65%

MASCOT:(PepMatched Observed.Hits Coverage)

| Seq             | Charge | ObservedMS | ExpectedMS | CalculatedMS | PepScore | PepHits |
|-----------------|--------|------------|------------|--------------|----------|---------|
| ALSTGEKGFQYK    | +2     | 629.3305   | 1256.6465  | 1256.6400    | 0.01     | 47 5    |
| VKEGMSIVEAMER   | +3     | 493.9159   | 1478.7259  | 1477.7268    | 1        | 42 6    |
| SIYGEKFEDENFILK | +2     | 916.4589   | 1830.9033  | 1830.9039    | 0        | 64 3    |

|            |                |                                 |              |                      |                                   |                                       |
|------------|----------------|---------------------------------|--------------|----------------------|-----------------------------------|---------------------------------------|
| <b>No.</b> | <b>Protein</b> | <b>Matched (SEQUEST MASCOT)</b> | <b>emPAI</b> | <b>Strategy.Hits</b> | <b>PepMatched(SEQUEST MASCOT)</b> | <b>SpectraMatched(SEQUEST MASCOT)</b> |
| 305.       | IPI00362487    | Y Y                             | 0.56         | 1                    | 2 3 3                             | 6                                     |

\*Des:

Protein phosphatase V

SEQUEST:(PepMatched Observed.Hits Coverage) 2 1 11.57%

MASCOT:(PepMatched Observed.Hits Coverage) 3 1 13.82%

| Seq                 | Charge | Xcor | Delta | Proability | PepHits  |
|---------------------|--------|------|-------|------------|----------|
| TGGQVPDTNYIFMGDFVDR | +2     |      | 5.745 | 0.559      | 0.9611 2 |
| GYYSLETFTYLLALK     | +3     |      | 5.496 | 0.610      | 1.0000 2 |

| Seq             | Charge | ObservedMS | ExpectedMS | CalculatedMS | PepScore | PepHits |
|-----------------|--------|------------|------------|--------------|----------|---------|
| VTNEFVHINNLK    | +2     | 714.39     | 1426.76    | 1426.76      | 0 75     | 2       |
| APLDLDKYVEIAR   | +2     | 751.91     | 1501.81    | 1501.81      | 0 53     | 2       |
| GYYSLETFTYLLALK | +2     | 891.47     | 1780.93    | 1780.93      | 0 64     | 2       |

|            |                |                                 |              |                      |                                   |                                       |
|------------|----------------|---------------------------------|--------------|----------------------|-----------------------------------|---------------------------------------|
| <b>No.</b> | <b>Protein</b> | <b>Matched (SEQUEST MASCOT)</b> | <b>emPAI</b> | <b>Strategy.Hits</b> | <b>PepMatched(SEQUEST MASCOT)</b> | <b>SpectraMatched(SEQUEST MASCOT)</b> |
| 306.       | IPI00361686    | Y Y                             | 1.47         | 1                    | 6 3 11                            | 6                                     |

\*Des:

Complement component 1, q subcomponent binding protein

SEQUEST:(PepMatched Observed.Hits Coverage) 6 1 43.66%

MASCOT:(PepMatched Observed.Hits Coverage) 3 1 15.84%

| Seq                            | Charge | Xcor  | Delta | Proability | PepHits  |
|--------------------------------|--------|-------|-------|------------|----------|
| EVSFQTTGDSEWR                  | +2     | 3.365 | 0.396 | 0.9982     | 3        |
| MSGDWELEVNGTEAK                | +2     | 4.952 | 0.547 | 1.0000     | 2        |
| AEEQEPELTSTPNFVVEVTK           | +2     | 4.584 | 0.589 | 1.0000     | 2        |
| AFVEFLTDEIKEEK                 | +2     | 3.394 | 0.352 | 0.9537     | 2        |
| DTNYTLNTDSLWALYDHLMDFLADR      | +3     |       | 4.540 | 0.531      | 0.9999 2 |
| GVDNTFADELVELSTALEHQEYITFLEDLK | +3     |       | 6.498 | 0.538      | 1.0000 3 |

| Seq             | Charge | ObservedMS | ExpectedMS | CalculatedMS | PepScore | PepHits |
|-----------------|--------|------------|------------|--------------|----------|---------|
| EVSFQTTGDSEWR   | +2     | 771.35     | 1540.69    | 1540.68      | 0.01 77  | 3       |
| MSGDWELEVNGTEAK | +2     | 833.38     | 1664.74    | 1664.74      | 0 80     | 2       |
| AFVEFLTDEIKEEK  | +2     | 849.44     | 1696.86    | 1696.86      | 0 67     | 2       |

|            |                |                                 |              |                      |                                   |                                       |
|------------|----------------|---------------------------------|--------------|----------------------|-----------------------------------|---------------------------------------|
| <b>No.</b> | <b>Protein</b> | <b>Matched (SEQUEST MASCOT)</b> | <b>emPAI</b> | <b>Strategy.Hits</b> | <b>PepMatched(SEQUEST MASCOT)</b> | <b>SpectraMatched(SEQUEST MASCOT)</b> |
| 307.       | IPI00210975    | Y Y                             | 0.59         | 1                    | 16 15 23                          | 18                                    |

\*Des:

150 kDa oxygen-regulated protein precursor

SEQUEST:(PepMatched Observed.Hits Coverage) 16 1 28.05%

| Seq             | Charge | Xcor  | Delta | Proability | PepHits  |
|-----------------|--------|-------|-------|------------|----------|
| LYQPEYQEVSTEEQR | +2     |       | 4.717 | 0.539      | 1.0000 1 |
| LPATEKPVLLSK    | +2     | 3.120 | 0.423 | 0.9990     | 2        |

Identified Human Platelet Proteins

| Seq                                        | Charge | ObservedMS | ExpectedMS | CalculatedMS | PepScore | PepHits          |   |
|--------------------------------------------|--------|------------|------------|--------------|----------|------------------|---|
| FLGDSAAGMAIK                               | +2     | 2.759      | 0.288      | 0.9825       | 1        |                  |   |
| TLGGLEMELR                                 | +2     | 3.211      | 0.243      | 0.9911       | 1        |                  |   |
| AHFNLDESGVLSLDR                            | +2     | 4.506      | 0.574      | 1.0000       | 2        |                  |   |
| VAIVKPGVPMEIVLNK                           | +3     | 2.161      | 0.423      | 0.9988       | 2        |                  |   |
| NINADEAAAMGAVYQAAALSK                      | +2     | 6.055      | 0.718      | 1.0000       | 2        |                  |   |
| AANSLEAFIFETQDK+2                          | 4.642  | 0.565      | 1.0000     | 3            |          |                  |   |
| TVLSANADHMAQIEGLMDDVDFK                    | +3     | 3.485      | 0.395      | 0.9997       | 2        |                  |   |
| VESVFETLVEDSPEEESTLTK                      | +2     | 5.563      | 0.629      | 1.0000       | 2        |                  |   |
| VLQLINDNTATALSYGVFR                        | +2     | 5.568      | 0.635      | 1.0000       | 2        |                  |   |
| YSHDFNFHINYGDLGFLGPEDLR                    | +3     | 5.527      | 0.586      | 1.0000       | 2        |                  |   |
| LSATSTWLEDEGFGATTVMLK                      | +2     | 4.771      | 0.745      | 1.0000       | 1        |                  |   |
| DAVIYPILVEFTR                              | +2     | 2.775      | 0.457      | 0.9985       | 1        |                  |   |
| LIPEMDQIFTDVEMTTLEK                        | +2     | 6.084      | 0.693      | 1.0000       | 3        |                  |   |
| SRFPEHELNVDPQR                             | +3     | 3.793      | 0.385      | 0.9971       | 2        |                  |   |
| MASCOT:(PepMatched Observed.Hits Coverage) |        |            | 15         | 1            | 25.19%   |                  |   |
| Seq                                        | Charge | ObservedMS | ExpectedMS | CalculatedMS |          | PepScore PepHits |   |
| LYQPEYQEVSTEEQR                            | +2     | 949.95     | 1897.88    | 1897.87      | 0.01     | 68               | 1 |
| YFQHLLGK                                   | +2     | 503.28     | 1004.55    | 1004.54      | 0.01     | 44               | 2 |
| TLGGLEMELR                                 | +2     | 559.80     | 1117.59    | 1117.58      | 0.01     | 50               | 2 |
| AHFNLDESGVLSLDR                            | +2     | 836.92     | 1671.82    | 1671.82      | 0        | 64               | 2 |
| AANSLEAFIFETQDK+2                          | 842.42 | 1682.82    | 1682.82    | 0            | 79       | 3                |   |
| VLQLINDNTATALSYGVFR                        | +3     | 699.05     | 2094.12    | 2094.11      | 0.01     | 61               | 1 |
| VESVFETLVEDSPEEESTLTK                      | +3     | 790.05     | 2367.14    | 2367.12      | 0.02     | 49               | 1 |
| TVLSANADHMAQIEGLMDDVDFK                    | +3     | 840.74     | 2519.19    | 2519.17      | 0.02     | 45               | 2 |
| YSHDFNFHINYGDLGFLGPEDLR                    | +3     | 909.44     | 2725.28    | 2725.26      | 0.02     | 95               | 1 |
| NINADEAAAMGAVYQAAALSK                      | +3     | 693.68     | 2078.02    | 2078.01      | 0.01     | 50               | 2 |
| DAVIYPILVEFTR                              | +2     | 768.43     | 1534.84    | 1534.84      | 0        | 56               | 2 |
| LIPEMDQIFTDVEMTTLEK                        | +3     | 751.71     | 2252.11    | 2252.10      | 0.01     | 45               | 1 |
| EAGTQPQLQIR                                | +2     | 621.34     | 1240.67    | 1239.66      | 1.01     | 41               | 5 |
| FLGDSAAGMAIK                               | +2     | 590.81     | 1179.60    | 1179.60      | 0        | 73               | 2 |
| VAIVKPGVPMEIVLNK                           | +3     | 569.68     | 1706.00    | 1706.02      | -0.01    | 49               | 4 |

| No.   | Protein                                     | Matched (SEQUEST MASCOT) | emPAI      | Strategy.Hits | PepMatched(SEQUEST MASCOT) | SpectraMatched(SEQUEST MASCOT) |
|-------|---------------------------------------------|--------------------------|------------|---------------|----------------------------|--------------------------------|
| 308.  | IPI00421624                                 | Y                        | Y          | 0.34          | 1                          | 2 3 5 7                        |
| *Des: | IMP (Inosine monophosphate) dehydrogenase 2 |                          |            |               |                            |                                |
|       | SEQUEST:(PepMatched Observed.Hits Coverage) |                          |            | 2             | 1                          | 6.3%                           |
|       | Seq                                         | Charge                   | Xcor       | Delta         | Probility                  | PepHits                        |
|       | TSSAQVEGGVHGLHSYEKR                         | +3                       | 2.799      | 0.459         | 1.0000                     | 2                              |
|       | VAQGVSGAVQDK                                | +2                       | 3.718      | 0.384         | 0.9999                     | 4                              |
|       | MASCOT:(PepMatched Observed.Hits Coverage)  |                          |            | 3             | 1                          | 6.3%                           |
|       | Seq                                         | Charge                   | ObservedMS | ExpectedMS    | CalculatedMS               | PepScore PepHits               |
|       | TSSAQVEGGVHGLHSYEK                          | +3                       | 629.3063   | 1884.8970     | 1884.8965                  | 0 44 2                         |
|       | TSSAQVEGGVHGLHSYEKR                         | +3                       | 681.3403   | 2040.9992     | 2040.9976                  | 0 46 2                         |
|       | VAQGVSGAVQDK                                | +2                       | 579.8089   | 1157.6032     | 1157.6040                  | 0 78 4                         |

| No.  | Protein     | Matched (SEQUEST MASCOT) | emPAI | Strategy.Hits | PepMatched(SEQUEST MASCOT) | SpectraMatched(SEQUEST MASCOT) |
|------|-------------|--------------------------|-------|---------------|----------------------------|--------------------------------|
| 309. | IPI00421625 | Y                        | N     | 0.69          | 3                          | 3 0 5 0                        |

Identified Human Platelet Proteins

|       |                                                      |                          |            |               |                            |                  |                                |    |  |
|-------|------------------------------------------------------|--------------------------|------------|---------------|----------------------------|------------------|--------------------------------|----|--|
| *Des: | Myosin regulatory light chain                        |                          |            |               |                            |                  |                                |    |  |
|       | SEQUEST:(PepMatched Observed.Hits Coverage)          |                          |            | 3             | 5                          | 22.28%           |                                |    |  |
|       | Seq                                                  | Charge                   | Xcor       | Delta         | Proability                 | PepHits          |                                |    |  |
|       | FTDEEVDELYR                                          | +2                       |            | 3.386         | 0.777                      | 1.0000           | 1                              |    |  |
|       | EAPIDKKGNFNIEFTR                                     | +3                       |            | 2.706         | 0.694                      | 0.9995           | 3                              |    |  |
|       | ELLTTMGDRFTDEEVDELYR                                 | +3                       |            | 4.834         | 0.716                      | 1.0000           | 2                              |    |  |
|       | MASCOT:(PepMatched Observed.Hits Coverage)           |                          |            |               |                            |                  |                                |    |  |
| No.   | Protein                                              | Matched (SEQUEST MASCOT) | emPAI      | Strategy.Hits | PepMatched(SEQUEST MASCOT) |                  | SpectraMatched(SEQUEST MASCOT) |    |  |
| 310.  | IPI00200344                                          | Y N                      | 0.19       | 1             | 2                          | 0                | 2                              | 0  |  |
| *Des: | Retinoid-inducible serine carboxypeptidase precursor |                          |            |               |                            |                  |                                |    |  |
|       | SEQUEST:(PepMatched Observed.Hits Coverage)          |                          |            | 2             | 1                          | 6.3%             |                                |    |  |
|       | Seq                                                  | Charge                   | Xcor       | Delta         | Proability                 | PepHits          |                                |    |  |
|       | AGHMVPADQGDMALK                                      | +2                       |            | 2.899         | 0.634                      | 0.9956           | 2                              |    |  |
|       | SYENLAFYWILK                                         | +2                       |            | 4.281         | 0.502                      | 0.9972           | 1                              |    |  |
|       | MASCOT:(PepMatched Observed.Hits Coverage)           |                          |            |               |                            |                  |                                |    |  |
| No.   | Protein                                              | Matched (SEQUEST MASCOT) | emPAI      | Strategy.Hits | PepMatched(SEQUEST MASCOT) |                  | SpectraMatched(SEQUEST MASCOT) |    |  |
| 311.  | IPI00388768                                          | Y N                      | 0.22       | 2             | 3                          | 0                | 6                              | 0  |  |
| *Des: | 51 kDa protein                                       |                          |            |               |                            |                  |                                |    |  |
|       | SEQUEST:(PepMatched Observed.Hits Coverage)          |                          |            | 3             | 2                          | 9.23%            |                                |    |  |
|       | Seq                                                  | Charge                   | Xcor       | Delta         | Proability                 | PepHits          |                                |    |  |
|       | SIYYITGESK                                           | +2                       |            | 2.897         | 0.451                      | 0.9995           | 5                              |    |  |
|       | HLEINPDHPIVETLR                                      | +3                       |            | 3.851         | 0.528                      | 1.0000           | 4                              |    |  |
|       | SLTNDWEDHLAVK                                        | +2                       |            | 3.864         | 0.471                      | 0.9999           | 3                              |    |  |
|       | MASCOT:(PepMatched Observed.Hits Coverage)           |                          |            |               |                            |                  |                                |    |  |
| No.   | Protein                                              | Matched (SEQUEST MASCOT) | emPAI      | Strategy.Hits | PepMatched(SEQUEST MASCOT) |                  | SpectraMatched(SEQUEST MASCOT) |    |  |
| 312.  | IPI00324452                                          | Y Y                      | 0.14       | 1             | 2                          | 2                | 7                              | 7  |  |
| *Des: | Complement component C1q receptor precursor          |                          |            |               |                            |                  |                                |    |  |
|       | SEQUEST:(PepMatched Observed.Hits Coverage)          |                          |            | 2             | 1                          | 3.36%            |                                |    |  |
|       | Seq                                                  | Charge                   | Xcor       | Delta         | Proability                 | PepHits          |                                |    |  |
|       | LSAAEAQHR                                            | +2                       |            | 2.974         | 0.340                      | 0.9975           | 6                              |    |  |
|       | HVQEALAQLLK                                          | +2                       |            | 3.255         | 0.502                      | 0.9998           | 6                              |    |  |
|       | MASCOT:(PepMatched Observed.Hits Coverage)           |                          |            | 2             | 1                          | 3.36%            |                                |    |  |
|       | Seq                                                  | Charge                   | ObservedMS | ExpectedMS    | CalculatedMS               | Pepscore PepHits |                                |    |  |
|       | LSAAEAQHR                                            | +2                       | 491.7599   | 981.5053      | 981.4992                   | 0.01             | 73                             | 4  |  |
|       | HVQEALAQLLK                                          | +2                       | 625.3710   | 1248.7275     | 1248.7190                  | 0.01             | 66                             | 5  |  |
| No.   | Protein                                              | Matched (SEQUEST MASCOT) | emPAI      | Strategy.Hits | PepMatched(SEQUEST MASCOT) |                  | SpectraMatched(SEQUEST MASCOT) |    |  |
| 313.  | IPI00563448                                          | N Y                      | 0.62       | 1             | 0                          | 4                | 0                              | 38 |  |
| *Des: | 31 kDa protein                                       |                          |            |               |                            |                  |                                |    |  |
|       | SEQUEST:(PepMatched Observed.Hits Coverage)          |                          |            | 4             | 2                          | 15.88%           |                                |    |  |
|       | MASCOT:(PepMatched Observed.Hits Coverage)           |                          |            | 4             | 2                          | 15.88%           |                                |    |  |
|       | Seq                                                  | Charge                   | ObservedMS | ExpectedMS    | CalculatedMS               | Pepscore PepHits |                                |    |  |
|       | QLEEEQALQK                                           | +2                       | 672.3479   | 1342.6812     | 1342.6728                  | 0.01             | 61                             | 6  |  |
|       | ATDAEADVASLNR                                        | +2                       | 666.8312   | 1331.6478     | 1331.6317                  | 0.02             | 47                             | 2  |  |

Identified Human Platelet Proteins

|                   |    |          |           |           |      |     |    |
|-------------------|----|----------|-----------|-----------|------|-----|----|
| AMKDEEKMELQEMQLK  | +2 | 990.9874 | 1979.9602 | 1979.9366 | 0.02 | 115 | 34 |
| KATDAEADVASLNR +2 |    | 731.3425 | 1460.6704 | 1459.7266 | 0.94 | 71  | 6  |

No. 314. Protein IPI00464815 Matched (SEQUEST MASCOT) Y Y emPAI Strategy.Hits 0.75 5 PepMatched(SEQUEST MASCOT) 4 12 SpectraMatched(SEQUEST MASCOT) 10 71

\*Des: Alpha enolase

| SEQUEST:(PepMatched Observed.Hits Coverage) |             | 4          | 6          | 16.78%       |                                          |
|---------------------------------------------|-------------|------------|------------|--------------|------------------------------------------|
| Seq                                         | Charge Xcor | Delta      | Proability | PepHits      |                                          |
| IDQLMIEMDGTENK                              | +2          | 4.337      | 0.628      | 1.0000       | 1                                        |
| DATNVGDEGGFAPNILENK                         | +2          | 5.780      | 0.712      | 1.0000       | 1                                        |
| FTATAGIQVVGDDLTVTNPK                        | +2          | 5.507      | 0.663      | 1.0000       | 1                                        |
| LAMQEFMILPVGASSFR                           | +2          | 3.907      | 0.707      | 1.0000       | 2                                        |
| MASCOT:(PepMatched Observed.Hits Coverage)  |             | 12         | 11         | 43.76%       |                                          |
| Seq                                         | Charge      | ObservedMS | ExpectedMS | CalculatedMS | Pepscore PepHits                         |
| YITPQLADLYK                                 | +2          | 720.3799   | 1438.7452  | 1438.7344    | 0.01 62 5                                |
| VNQIGSVTESLQACK                             | +2          | 405.6685   | 809.3225   | 809.4395     | -0.11 44 16 116 10                       |
| AVEHINK +2                                  |             | 405.6685   | 809.3225   | 809.4395     | -0.11 44 16                              |
| DATNVGDEGGFAPNILENK                         | +2          | 980.9747   | 1959.9348  | 1959.9173    | 0.02 80 4                                |
| AGKYDLDFKSPDDASR                            | +2          | 892.9344   | 1783.8542  | 1783.8376    | 0.02 69 8                                |
| AAVPSGASTGIYEALER                           | +2          | 902.9826   | 1803.9507  | 1803.9366    | 0.01 126 15                              |
| IGAEVYHNLK                                  | +2          | 572.3153   | 1142.6161  | 1142.6084    | 0.01 52 8                                |
| LAQSNWGWVMSHR                               | +2          | 771.3907   | 1540.7668  | 1540.7568    | 0.01 58 6                                |
| LAMQEFMILPVGASSFR                           | +2          | 948.9965   | 1895.9784  | 1895.9637    | 0.01 101 10                              |
| FGANAILGVSLAVCK                             | +2          | 731.9123   | 1461.8100  | 1461.8013    | 0.01 116 10                              |
| AVEHINKTIAPALVSK                            | +2          | 846.0027   | 1689.9909  | 1689.9777    | 0.01 65 2                                |
| HIADLAGNPEVILPVPFNVINGGSHAGNK               |             |            |            | +3           | 1007.8756 3020.6050 3020.5831 0.02 96 17 |

No. 315. Protein IPI00197711 Matched (SEQUEST MASCOT) Y Y emPAI Strategy.Hits 2.28 5 PepMatched(SEQUEST MASCOT) 14 14 SpectraMatched(SEQUEST MASCOT) 44 150

\*Des: L-lactate dehydrogenase A chain

| SEQUEST:(PepMatched Observed.Hits Coverage) |             | 14    | 14         | 48.22%  |    |
|---------------------------------------------|-------------|-------|------------|---------|----|
| Seq                                         | Charge Xcor | Delta | Proability | PepHits |    |
| DYSVTANSK                                   | +2          | 2.841 | 0.446      | 0.9992  | 5  |
| VIGSGCNLDSAR                                | +2          | 3.664 | 0.597      | 1.0000  | 10 |
| QVDSAYEVIK                                  | +2          | 3.261 | 0.536      | 1.0000  | 6  |
| DLADELALVDVIEDK                             | +2          | 5.675 | 0.520      | 1.0000  | 3  |
| VTLTPDEEAR                                  | +2          | 2.668 | 0.420      | 0.9980  | 10 |
| DLADELALVDVIEDK                             | +2          | 5.138 | 0.492      | 1.0000  | 5  |
| GLYGIKEDVFLSVPCILGQNGISDVVK                 | +3          | 4.751 | 0.448      | 1.0000  | 6  |
| IVSSKDYSVTANSK                              | +2          | 4.143 | 0.500      | 1.0000  | 3  |
| SLNPQLGTDADKEQWKDVHK                        | +3          | 3.534 | 0.533      | 1.0000  | 3  |
| SLNPQLGTDADKEQWK                            | +2          | 4.559 | 0.564      | 1.0000  | 1  |
| GEMMDLQHGSFLK                               | +2          | 3.489 | 0.522      | 0.9998  | 3  |
| LVIITAGAR                                   | +2          | 3.164 | 0.393      | 0.9992  | 25 |
| LLIVSNPVDILTYVAWK                           | +2          | 5.752 | 0.574      | 0.9739  | 3  |
| LKGEMMDLQHGSFLK                             | +2          | 4.496 | 0.491      | 1.0000  | 8  |
| MASCOT:(PepMatched Observed.Hits Coverage)  |             | 14    | 16         | 52.95%  |    |

| Identified Human Platelet Proteins |        |            |            |              |           |      |     |          |         |
|------------------------------------|--------|------------|------------|--------------|-----------|------|-----|----------|---------|
| Seq                                | Charge | ObservedMS | ExpectedMS | CalculatedMS |           |      |     | Pepscore | PepHits |
| VTLTPDEEAR                         | +2     | 565.7917   | 1129.5689  | 1129.5615    | 0.01      | 51   | 28  |          |         |
| SADTLWGIQK                         | +2     | 559.7989   | 1117.5832  | 1117.5768    | 0.01      | 57   | 12  |          |         |
| VIGSGCNLDSAR                       | +2     | 596.2971   | 1190.5796  | 1190.5713    | 0.01      | 89   | 28  |          |         |
| QVVD SAYEVIK                       | +2     | 625.8397   | 1249.6648  | 1249.6554    | 0.01      | 68   | 24  |          |         |
| DLADELALVDVIEDKLLK                 | +2     | 950.0301   | 1898.0456  | 1898.0248    | 0.02      | 100  | 12  |          |         |
| SLNPQLGTDADKEQWK                   | +2     | 915.4644   | 1828.9143  | 1828.8955    | 0.02      | 101  | 2   |          |         |
| GEMMDLQHGSFLK                      | +2     | 803.3992   | 1604.7839  | 1604.7690    | 0.01      | 76   | 12  |          |         |
| DLADELALVDVIEDK+2                  |        | 829.4377   | 1656.8608  | 1656.8457    | 0.02      | 94   | 13  |          |         |
| IVSSKDYSVTANSK                     | +2     | 749.8980   | 1497.7815  | 1497.7674    | 0.01      | 83   | 7   |          |         |
| FIIPNVVK                           | +2     | 465.2972   | 928.5799   | 928.5745     | 0.01      | 45   | 4   |          |         |
| GLYGIKEDVFLSVPCILGQNGISDVVK        | +3     |            | 955.1894   | 2862.5463    | 2862.5200 | 0.03 | 58  | 2        |         |
| LVIITAGAR                          | +2     | 457.2977   | 912.5809   | 912.5756     | 0.01      | 67   | 45  |          |         |
| LLIVSNPVDILTYVAWK                  | +2     |            | 972.5677   | 1943.1208    | 1943.1131 | 0.01 | 130 | 27       |         |
| LKGEMMDLQHGSFLK                    | +2     |            | 923.9882   | 1845.9618    | 1845.9480 | 0.01 | 72  | 19       |         |

No. 316. Protein IPI00387897 Matched (SEQUEST MASCOT) N Y emPAI 2.3 Strategy.Hits 2 PepMatched(SEQUEST MASCOT) 0 SpectraMatched(SEQUEST MASCOT) 9 0 264  
 \*Des: Ywhaz protein

SEQUEST:(PepMatched Observed.Hits Coverage)

MASCOT:(PepMatched Observed.Hits Coverage)

| Seq                  | Charge | ObservedMS | ExpectedMS | CalculatedMS |         |      |     | Pepscore | PepHits |
|----------------------|--------|------------|------------|--------------|---------|------|-----|----------|---------|
| YLAEVAAGDDK          | +2     | 576.29     | 1150.56    | 1150.55      | 0.01    | 72   | 44  |          |         |
| YLAEVAAGDDKK         | +2     | 640.33     | 1278.65    | 1278.65      | 0       | 70   | 50  |          |         |
| SVTEQGAELSNEER       | +2     | 774.87     | 1547.72    | 1547.71      | 0.01    | 111  | 136 |          |         |
| FLIPNASQPESK         | +2     | 665.86     | 1329.70    | 1329.69      | 0.01    | 81   | 38  |          |         |
| GIVDQSQQAYQEAFFEISK  | +3     |            | 681.01     | 2040.00      | 2039.98 | 0.02 | 69  | 18       |         |
| KGIVDQSQQAYQEAFFEISK | +3     |            | 723.70     | 2168.09      | 2168.07 | 0.02 | 72  | 8        |         |
| NLLSVAYKNVVGAR       | +2     | 752.45     | 1502.88    | 1502.86      | 0.02    | 73   | 19  |          |         |
| TAFDEAIAELDTLSEESYK  | +3     |            | 711.34     | 2131.00      | 2130.98 | 0.02 | 76  | 28       |         |
| LGLALNFSVFYYEILNSPEK | +3     |            | 773.08     | 2316.23      | 2316.20 | 0.03 | 91  | 15       |         |

No. 317. Protein IPI00607203 Matched (SEQUEST MASCOT) N Y emPAI 1.6 Strategy.Hits 1 PepMatched(SEQUEST MASCOT) 0 SpectraMatched(SEQUEST MASCOT) 2 0 20  
 \*Des: Tubulin alpha-2 chain

SEQUEST:(PepMatched Observed.Hits Coverage)

MASCOT:(PepMatched Observed.Hits Coverage)

| Seq             | Charge | ObservedMS | ExpectedMS | CalculatedMS |   |    |    | Pepscore | PepHits |
|-----------------|--------|------------|------------|--------------|---|----|----|----------|---------|
| DVNAAIATIK      | +2     | 508.29     | 1014.57    | 1014.57      | 0 | 59 | 20 |          |         |
| AVFVDLEPTVIDEVR | +2     | 851.46     | 1700.90    | 1700.90      | 0 | 57 | 10 |          |         |

No. 318. Protein IPI00555287 Matched (SEQUEST MASCOT) Y Y emPAI 0.07 Strategy.Hits 4 PepMatched(SEQUEST MASCOT) 2 SpectraMatched(SEQUEST MASCOT) 11 4 30  
 \*Des: Non-erythroid spectrin beta

SEQUEST:(PepMatched Observed.Hits Coverage)

| Seq             | Charge | Xcor  | Delta | Probability | PepHits |
|-----------------|--------|-------|-------|-------------|---------|
| SALPAQSAATLTPAR | +2     | 3.511 | 0.432 | 0.9993      | 5       |



Identified Human Platelet Proteins

| Seq                                                   | Charge | ObservedMS | ExpectedMS | CalculatedMS | Pepscore | PepHits |
|-------------------------------------------------------|--------|------------|------------|--------------|----------|---------|
| AQTLPTS SVVTITSESSPGKR                                | +2     | 4.656      | 0.579      | 1.0000       | 2        |         |
| MASCOT:(PepMatched Observed.Hits Coverage) 11 5 6.67% |        |            |            |              |          |         |
| MLTAQDMSYDEAR                                         | +2     | 765.8387   | 1529.6629  | 1529.6490    | 0.01     | 65 4    |
| ETWLSENQR                                             | +2     | 581.7831   | 1161.5516  | 1161.5414    | 0.01     | 45 3    |
| MWEVLESTTQTK                                          | +2     | 726.8611   | 1451.7076  | 1451.6966    | 0.01     | 76 3    |
| LTTLELLEVR                                            | +2     | 593.8610   | 1185.7075  | 1185.6969    | 0.01     | 49 1    |
| LWEYLLELLR                                            | +2     | 674.3929   | 1346.7712  | 1346.7598    | 0.01     | 71 8    |
| LQAAYAGDKADDIQKR                                      | +3     | 588.3115   | 1761.9127  | 1761.9009    | 0.01     | 42 2    |
| AKDEQSAVSMKK                                          | +3     | 478.9307   | 1433.7703  | 1433.7548    | 0.02     | 41 4    |
| SALPAQSAATLPAR                                        | +2     | 677.3823   | 1352.7500  | 1352.7412    | 0.01     | 76 5    |
| AQTLPTS SVVTITSESSPGKR                                | +2     | 1030.0647  | 2058.1148  | 2058.0957    | 0.02     | 102 2   |
| LILEVHQFSR                                            | +2     | 621.3596   | 1240.7046  | 1240.6928    | 0.01     | 46 2    |
| SNAHYNLQNAFNLAEQHLGLTK                                | +3     | 828.4250   | 2482.2533  | 2482.2352    | 0.02     | 75 2    |

| No.                                                            | Protein                                     | Matched (SEQUEST MASCOT) | emPAI | Strategy.Hits | PepMatched(SEQUEST MASCOT) | SpectraMatched(SEQUEST MASCOT) |
|----------------------------------------------------------------|---------------------------------------------|--------------------------|-------|---------------|----------------------------|--------------------------------|
| 319.                                                           | IPI00369247                                 | Y                        | Y     | 0.15          | 2                          | 2 2 5 2                        |
| *Des:                                                          | PREDICTED: similar to RIKEN cDNA 2810457I06 |                          |       |               |                            |                                |
| SEQUEST:(PepMatched Observed.Hits Coverage) 2 1 4.16%          |                                             |                          |       |               |                            |                                |
| Seq Charge Xcor Delta Probility PepHits                        |                                             |                          |       |               |                            |                                |
| TEVHVEPHKK +2 2.740 0.277 0.9873 4                             |                                             |                          |       |               |                            |                                |
| HGSALDLLLSMGFPR +2 4.395 0.632 1.0000 6                        |                                             |                          |       |               |                            |                                |
| MASCOT:(PepMatched Observed.Hits Coverage) 2 1 4.16%           |                                             |                          |       |               |                            |                                |
| Seq Charge ObservedMS ExpectedMS CalculatedMS Pepscore PepHits |                                             |                          |       |               |                            |                                |
| FAADFAAEAASK +2 599.79 1197.57 1197.57 0 46 2                  |                                             |                          |       |               |                            |                                |
| LVISESYDTYINR +2 786.90 1571.78 1571.78 0 55 1                 |                                             |                          |       |               |                            |                                |

| No.                                                    | Protein                                   | Matched (SEQUEST MASCOT) | emPAI | Strategy.Hits | PepMatched(SEQUEST MASCOT) | SpectraMatched(SEQUEST MASCOT) |
|--------------------------------------------------------|-------------------------------------------|--------------------------|-------|---------------|----------------------------|--------------------------------|
| 320.                                                   | IPI00231303                               | Y                        | N     | 0.31          | 1                          | 2 0 6 0                        |
| *Des:                                                  | Ribose-phosphate pyrophosphokinase I-like |                          |       |               |                            |                                |
| SEQUEST:(PepMatched Observed.Hits Coverage) 2 2 10.49% |                                           |                          |       |               |                            |                                |
| Seq Charge Xcor Delta Probility PepHits                |                                           |                          |       |               |                            |                                |
| VYAILTHGIFSGPAISR +2 5.149 0.568 1.0000 3              |                                           |                          |       |               |                            |                                |
| IQVIDISMILAEAIR +2 5.578 0.466 1.0000 3                |                                           |                          |       |               |                            |                                |
| MASCOT:(PepMatched Observed.Hits Coverage)             |                                           |                          |       |               |                            |                                |

| No.                                                            | Protein                         | Matched (SEQUEST MASCOT) | emPAI | Strategy.Hits | PepMatched(SEQUEST MASCOT) | SpectraMatched(SEQUEST MASCOT) |
|----------------------------------------------------------------|---------------------------------|--------------------------|-------|---------------|----------------------------|--------------------------------|
| 321.                                                           | IPI00325189                     | Y                        | Y     | 0.72          | 3                          | 2 6 19 65                      |
| *Des:                                                          | Nucleoside diphosphate kinase B |                          |       |               |                            |                                |
| SEQUEST:(PepMatched Observed.Hits Coverage) 2 2 23.22%         |                                 |                          |       |               |                            |                                |
| Seq Charge Xcor Delta Probility PepHits                        |                                 |                          |       |               |                            |                                |
| EIGLWFKPEELIDYK +2 3.621 0.492 1.0000 4                        |                                 |                          |       |               |                            |                                |
| YMNSGPVVAMVWEGLN VVK +2 5.627 0.534 1.0000 3                   |                                 |                          |       |               |                            |                                |
| MASCOT:(PepMatched Observed.Hits Coverage) 6 3 65.16%          |                                 |                          |       |               |                            |                                |
| Seq Charge ObservedMS ExpectedMS CalculatedMS Pepscore PepHits |                                 |                          |       |               |                            |                                |
| NIIHGSDSVESA EK +2 743.37 1484.72 1484.71 0.01 59 4            |                                 |                          |       |               |                            |                                |
| VMLGETNPADSKPGTIR +2 893.47 1784.92 1784.91 0.01 110 10        |                                 |                          |       |               |                            |                                |

Identified Human Platelet Proteins

|                          |    |        |         |         |         |      |    |   |  |
|--------------------------|----|--------|---------|---------|---------|------|----|---|--|
| GLVGEIIR                 | +2 | 492.81 | 983.61  | 983.61  | 0       | 43   | 8  |   |  |
| TFIAIKPDGVQR             | +3 | 448.93 | 1343.76 | 1343.76 | 0       | 45   | 16 |   |  |
| ASEEHLKQHYIDLKDRPFFPGLVK | +3 |        | 956.52  | 2866.52 | 2866.51 | 0.01 | 48 | 1 |  |
| YMNSGPVVAMVWEGLNVVK      | +3 | 698.36 | 2092.05 | 2092.05 | 0       | 74   | 6  |   |  |

|       |                                                     |                          |            |               |                            |                                |    |          |         |
|-------|-----------------------------------------------------|--------------------------|------------|---------------|----------------------------|--------------------------------|----|----------|---------|
| No.   | Protein                                             | Matched (SEQUEST MASCOT) | emPAI      | Strategy.Hits | PepMatched(SEQUEST MASCOT) | SpectraMatched(SEQUEST MASCOT) |    |          |         |
| 322.  | IPI00198444                                         | Y                        | Y          | 0.35          | 1                          | 2                              | 3  | 2        | 3       |
| *Des: | Glycine amidinotransferase, mitochondrial precursor |                          |            |               |                            |                                |    |          |         |
|       | SEQUEST:(PepMatched Observed.Hits Coverage)         | 2                        | 1          | 6.96%         |                            |                                |    |          |         |
|       | Seq                                                 | Charge                   | Xcor       | Delta         | Proability                 | PepHits                        |    |          |         |
|       | TPDFESTGLYSAMPR                                     |                          | +2         | 3.767         | 0.473                      | 0.9998                         | 1  |          |         |
|       | SQVTNYLGIEWMR                                       | +2                       | 3.346      | 0.463         | 0.9997                     | 1                              |    |          |         |
|       | MASCOT:(PepMatched Observed.Hits Coverage)          | 3                        | 1          | 9.97%         |                            |                                |    |          |         |
|       | Seq                                                 | Charge                   | ObservedMS | ExpectedMS    | CalculatedMS               |                                |    | Pepscore | PepHits |
|       | VMVDANEVPIQK                                        | +2                       | 671.86     | 1341.70       | 1341.70                    | 0                              | 41 | 2        |         |
|       | SQVTNYLGIEWMR                                       | +2                       | 798.90     | 1595.79       | 1595.78                    | 0.01                           | 52 | 1        |         |
|       | TPDFESTGLYSAMPR                                     | +2                       | 836.39     | 1670.76       | 1670.76                    | 0                              | 61 | 1        |         |

|       |                                             |                          |            |               |                            |                                |    |          |         |
|-------|---------------------------------------------|--------------------------|------------|---------------|----------------------------|--------------------------------|----|----------|---------|
| No.   | Protein                                     | Matched (SEQUEST MASCOT) | emPAI      | Strategy.Hits | PepMatched(SEQUEST MASCOT) | SpectraMatched(SEQUEST MASCOT) |    |          |         |
| 323.  | IPI00390975                                 | Y                        | Y          | 0.21          | 2                          | 2                              | 3  | 2        | 23      |
| *Des: | 57 kDa protein                              |                          |            |               |                            |                                |    |          |         |
|       | SEQUEST:(PepMatched Observed.Hits Coverage) | 2                        | 1          | 3.65%         |                            |                                |    |          |         |
|       | Seq                                         | Charge                   | Xcor       | Delta         | Proability                 | PepHits                        |    |          |         |
|       | LENEIQTYR                                   | +2                       | 3.487      | 0.197         | 0.9954                     | 1                              |    |          |         |
|       | LKYENEVALR                                  | +3                       | 3.220      | 0.249         | 0.9983                     | 3                              |    |          |         |
|       | MASCOT:(PepMatched Observed.Hits Coverage)  | 3                        | 3          | 4.87%         |                            |                                |    |          |         |
|       | Seq                                         | Charge                   | ObservedMS | ExpectedMS    | CalculatedMS               |                                |    | Pepscore | PepHits |
|       | VTMQNLNDR                                   | +2                       | 545.77     | 1089.53       | 1089.52                    | 0.01                           | 47 | 8        |         |
|       | LENEIQTYR                                   | +2                       | 583.30     | 1164.58       | 1164.58                    | 0                              | 44 | 4        |         |
|       | LAADDFR                                     | +2                       | 404.20     | 806.40        | 806.39                     | 0.01                           | 43 | 12       |         |

|       |                                             |                          |            |               |                            |                                |    |          |         |
|-------|---------------------------------------------|--------------------------|------------|---------------|----------------------------|--------------------------------|----|----------|---------|
| No.   | Protein                                     | Matched (SEQUEST MASCOT) | emPAI      | Strategy.Hits | PepMatched(SEQUEST MASCOT) | SpectraMatched(SEQUEST MASCOT) |    |          |         |
| 324.  | IPI00368449                                 | Y                        | Y          | 0.57          | 1                          | 3                              | 4  | 8        | 9       |
| *Des: | PREDICTED: similar to phosphomannomutase    |                          |            |               |                            |                                |    |          |         |
|       | SEQUEST:(PepMatched Observed.Hits Coverage) | 3                        | 1          | 16.59%        |                            |                                |    |          |         |
|       | Seq                                         | Charge                   | Xcor       | Delta         | Proability                 | PepHits                        |    |          |         |
|       | TVGYVTAPEDTR                                | +2                       | 3.377      | 0.328         | 0.9873                     | 3                              |    |          |         |
|       | IGVVGGSDFEK                                 | +2                       | 3.094      | 0.472         | 0.9998                     | 6                              |    |          |         |
|       | YDYVFPENGLVAYK                              | +2                       | 4.018      | 0.540         | 1.0000                     | 3                              |    |          |         |
|       | MASCOT:(PepMatched Observed.Hits Coverage)  | 4                        | 1          | 21.45%        |                            |                                |    |          |         |
|       | Seq                                         | Charge                   | ObservedMS | ExpectedMS    | CalculatedMS               |                                |    | Pepscore | PepHits |
|       | TVGYVTAPEDTR                                | +2                       | 705.82     | 1409.63       | 1408.68                    | 0.95                           | 51 | 3        |         |
|       | IGVVGGSDFEK                                 | +2                       | 554.29     | 1106.57       | 1106.56                    | 0.01                           | 54 | 5        |         |
|       | NGMLNVSPIGR                                 | +2                       | 579.31     | 1156.61       | 1156.60                    | 0.01                           | 48 | 2        |         |
|       | YDYVFPENGLVAYK                              | +2                       | 839.91     | 1677.81       | 1676.81                    | 1                              | 46 | 3        |         |

|     |         |                          |       |               |                            |                                |  |  |  |
|-----|---------|--------------------------|-------|---------------|----------------------------|--------------------------------|--|--|--|
| No. | Protein | Matched (SEQUEST MASCOT) | emPAI | Strategy.Hits | PepMatched(SEQUEST MASCOT) | SpectraMatched(SEQUEST MASCOT) |  |  |  |
|-----|---------|--------------------------|-------|---------------|----------------------------|--------------------------------|--|--|--|

Identified Human Platelet Proteins

|       |                                                                                                |                          |            |               |                            |                                |      |     |     |
|-------|------------------------------------------------------------------------------------------------|--------------------------|------------|---------------|----------------------------|--------------------------------|------|-----|-----|
| 325.  | IPI00195109                                                                                    | N                        | Y          | 0.14          | 1                          | 0                              | 2    | 0   | 3   |
| *Des: | Serine hydroxymethyl transferase 2                                                             |                          |            |               |                            |                                |      |     |     |
|       | SEQUEST:(PepMatched Observed.Hits Coverage)                                                    |                          |            |               |                            |                                |      |     |     |
|       | MASCOT:(PepMatched Observed.Hits Coverage) 2 1 4.67%                                           |                          |            |               |                            |                                |      |     |     |
|       | Seq                                                                                            | Charge                   | ObservedMS | ExpectedMS    | CalculatedMS               | PepScore PepHits               |      |     |     |
|       | NAQAMADALLK                                                                                    | +2                       | 573.30     | 1144.59       | 1144.59                    | 0                              | 41   | 1   |     |
|       | VLELVSITANK                                                                                    | +2                       | 593.85     | 1185.70       | 1185.70                    | 0                              | 66   | 2   |     |
| No.   | Protein                                                                                        | Matched (SEQUEST MASCOT) | emPAI      | Strategy.Hits | PepMatched(SEQUEST MASCOT) | SpectraMatched(SEQUEST MASCOT) |      |     |     |
| 326.  | IPI00364093                                                                                    | Y                        | Y          | 0.27          | 1                          | 2                              | 2    | 5   | 7   |
| *Des: | PREDICTED: similar to cytoskeleton-associated protein 1                                        |                          |            |               |                            |                                |      |     |     |
|       | SEQUEST:(PepMatched Observed.Hits Coverage) 2 2 10.84%                                         |                          |            |               |                            |                                |      |     |     |
|       | Seq                                                                                            | Charge                   | Xcor       | Delta         | Proability                 | PepHits                        |      |     |     |
|       | LSEEEAQASAI SVGSR                                                                              |                          | +2         | 4.871         | 0.508                      | 1.0000                         | 2    |     |     |
|       | LGPYNEELR                                                                                      |                          | +2         | 2.767         | 0.276                      | 0.9768 2                       |      |     |     |
|       | MASCOT:(PepMatched Observed.Hits Coverage) 2 2 10.84%                                          |                          |            |               |                            |                                |      |     |     |
|       | Seq                                                                                            | Charge                   | ObservedMS | ExpectedMS    | CalculatedMS               | PepScore PepHits               |      |     |     |
|       | LGPYNEELR                                                                                      |                          | +2         | 545.78        | 1089.55                    | 1089.55                        | 0    | 64  | 4   |
|       | LSEEEAQASAI SVGSR                                                                              |                          | +2         | 817.41        | 1632.81                    | 1632.80                        | 0.01 | 67  | 3   |
| No.   | Protein                                                                                        | Matched (SEQUEST MASCOT) | emPAI      | Strategy.Hits | PepMatched(SEQUEST MASCOT) | SpectraMatched(SEQUEST MASCOT) |      |     |     |
| 327.  | IPI00193361                                                                                    | Y                        | Y          | 0.02          | 1                          | 2                              | 2    | 3   | 7   |
| *Des: | PREDICTED: similar to ATPase, aminophospholipid transporter (APLT), class I, type 8A, member 1 |                          |            |               |                            |                                |      |     |     |
|       | SEQUEST:(PepMatched Observed.Hits Coverage) 2 1 4.12%                                          |                          |            |               |                            |                                |      |     |     |
|       | Seq                                                                                            | Charge                   | Xcor       | Delta         | Proability                 | PepHits                        |      |     |     |
|       | TSNLNEELGQVK                                                                                   |                          | +2         | 3.724         | 0.304                      | 0.9948 2                       |      |     |     |
|       | HLEQFATEGLR                                                                                    |                          | +2         | 2.702         | 0.403                      | 0.9930 1                       |      |     |     |
|       | MASCOT:(PepMatched Observed.Hits Coverage) 2 1 3.79%                                           |                          |            |               |                            |                                |      |     |     |
|       | Seq                                                                                            | Charge                   | ObservedMS | ExpectedMS    | CalculatedMS               | PepScore PepHits               |      |     |     |
|       | GADTVIYER                                                                                      |                          | +2         | 512.2628      | 1022.5110                  | 1022.5032                      | 0.01 | 43  | 2   |
|       | TSNLNEELGQVK                                                                                   |                          | +2         | 666.3523      | 1330.6900                  | 1330.6728                      | 0.02 | 60  | 5   |
| No.   | Protein                                                                                        | Matched (SEQUEST MASCOT) | emPAI      | Strategy.Hits | PepMatched(SEQUEST MASCOT) | SpectraMatched(SEQUEST MASCOT) |      |     |     |
| 328.  | IPI00372259                                                                                    | N                        | Y          | 1.34          | 2                          | 0                              | 9    | 0   | 110 |
| *Des: | Tropomyosin                                                                                    |                          |            |               |                            |                                |      |     |     |
|       | SEQUEST:(PepMatched Observed.Hits Coverage)                                                    |                          |            |               |                            |                                |      |     |     |
|       | MASCOT:(PepMatched Observed.Hits Coverage) 9 3 34.38%                                          |                          |            |               |                            |                                |      |     |     |
|       | Seq                                                                                            | Charge                   | ObservedMS | ExpectedMS    | CalculatedMS               | PepScore PepHits               |      |     |     |
|       | IQVLQQQADDAEER                                                                                 |                          | +2         | 821.9104      | 1641.8062                  | 1641.7958                      | 0.01 | 84  | 8   |
|       | TIDDLEDKLK                                                                                     |                          | +2         | 595.3230      | 1188.6314                  | 1188.6238                      | 0.01 | 62  | 32  |
|       | EQAEAEVASLNR                                                                                   |                          | +2         | 658.8303      | 1315.6461                  | 1315.6367                      | 0.01 | 70  | 14  |
|       | IQVLQQQADDAEERAER                                                                              |                          | +2         | 1000.0042     | 1997.9939                  | 1997.9766                      | 0.02 | 76  | 6   |
|       | KLVIIEGDLER                                                                                    |                          | +2         | 642.8832      | 1283.7519                  | 1283.7448                      | 0.01 | 46  | 12  |
|       | ALKDEEKMELQEIQLK                                                                               |                          | +2         | 973.0300      | 1944.0455                  | 1944.0237                      | 0.02 | 120 | 18  |
|       | AREQAEAEVASLNR                                                                                 |                          | +2         | 772.4009      | 1542.7873                  | 1542.7750                      | 0.01 | 100 | 8   |
|       | ILTDKLEAETR                                                                                    |                          | +2         | 708.9112      | 1415.8078                  | 1415.7984                      | 0.01 | 77  | 4   |
|       | AREQAEAEVASLNRR                                                                                |                          | +3         | 567.3033      | 1698.8880                  | 1698.8761                      | 0.01 | 56  | 22  |

Identified Human Platelet Proteins

No. 329. Protein IPI00197579 Matched (SEQUEST MASCOT) Y Y emPAI 1.12 Strategy.Hits 5 PepMatched(SEQUEST MASCOT) 12 15 55 SpectraMatched(SEQUEST MASCOT) 189

\*Des: Tubulin beta-5 chain

| SEQUEST:(PepMatched Observed.Hits Coverage) |        |            |            | 12           | 11               | 33.62% |    |  |  |
|---------------------------------------------|--------|------------|------------|--------------|------------------|--------|----|--|--|
| Seq                                         | Charge | Xcor       | Delta      | Proability   | PepHits          |        |    |  |  |
| ISVYYNEATGGK                                | +2     |            | 3.733      | 0.538        | 10               |        |    |  |  |
| EVDEQMLNVQNK                                | +2     |            | 4.547      | 0.261        | 15               |        |    |  |  |
| IMNTFSVVPSPK                                | +2     |            | 4.308      | 0.460        | 2                |        |    |  |  |
| PDNFVFGQSGAGNNWAK                           | +2     |            | 3.938      | 0.499        | 0.9996           | 1      |    |  |  |
| AILDLEPGTMDSVR                              | +2     |            | 3.407      | 0.544        | 0.9999           | 5      |    |  |  |
| ISEQFTAMFR                                  | +2     |            | 4.035      | 0.550        | 1.0000           | 6      |    |  |  |
| YLTVAAVFR                                   | +2     |            | 3.168      | 0.395        | 0.9995           | 6      |    |  |  |
| ALTVPALTQQVFDK                              | +2     |            | 4.392      | 0.502        | 1.0000           | 3      |    |  |  |
| SGPFGQIFRPDNFVFGQSGAGNNWAK                  | +3     |            | 8.076      | 0.644        | 1.0000           | 5      |    |  |  |
| LHFFMPGFAPLTSR                              | +2     | 2.638      | 0.599      | 0.9998       | 6                |        |    |  |  |
| MAVTFIGNSTAIQELFK                           | +2     |            | 6.138      | 0.556        | 1.0000           | 6      |    |  |  |
| MAVTFIGNSTAIQELFKRISEQFTAMFR                | +3     |            | 4.506      | 0.568        | 1.0000           | 3      |    |  |  |
| MASCOT:(PepMatched Observed.Hits Coverage)  |        |            |            | 15           | 13               | 46.46% |    |  |  |
| Seq                                         | Charge | ObservedMS | ExpectedMS | CalculatedMS | Pepscore PepHits |        |    |  |  |
| ISVYYNEATGGK                                | +2     | 651.32     | 1300.63    | 1300.63      | 0                | 75     | 9  |  |  |
| EVDEQMLNVQNK                                | +2     | 723.85     | 1445.69    | 1445.68      | 0.01             | 86     | 58 |  |  |
| FPGQLNADLRK                                 | +3     | 420.24     | 1257.69    | 1257.68      | 0.01             | 44     | 35 |  |  |
| IMNTFSVVPSPK                                | +2     | 660.36     | 1318.70    | 1318.70      | 0                | 89     | 6  |  |  |
| FPGQLNADLR                                  | +2     | 565.80     | 1129.59    | 1129.59      | 0                | 58     | 63 |  |  |
| KLAVNMVPFPR                                 | +2     | 635.99     | 1269.97    | 1270.72      | -0.74            | 51     | 10 |  |  |
| YLTVAAVFR                                   | +2     | 521.28     | 1040.55    | 1038.59      | 1.96             | 63     | 12 |  |  |
| ALTVPALTQQVFDK                              | +2     | 830.46     | 1658.90    | 1658.89      | 0.01             | 83     | 2  |  |  |
| SGPFGQIFRPDNFVFGQSGAGNNWAK                  | +3     | 933.46     | 2797.35    | 2797.34      | 0.01             | 94     | 8  |  |  |
| ISEQFTAMFR                                  | +2     | 615.30     | 1228.59    | 1228.59      | 0                | 73     | 30 |  |  |
| AILDLEPGTMDSVR                              | +2     | 808.42     | 1614.83    | 1614.83      | 0                | 46     | 23 |  |  |
| NSSYFVEWIPNNVK                              | +2     | 848.92     | 1695.83    | 1695.83      | 0                | 72     | 30 |  |  |
| LHFFMPGFAPLTSR                              | +3     | 540.95     | 1619.83    | 1619.83      | 0                | 52     | 12 |  |  |
| MAVTFIGNSTAIQELFK                           | +2     | 935.50     | 1868.98    | 1868.97      | 0.01             | 109    | 6  |  |  |
| GHYTEGAELVDSVLDVVR                          | +2     | 979.99     | 1957.97    | 1957.97      | 0                | 125    | 15 |  |  |

No. 330. Protein IPI00207038 Matched (SEQUEST MASCOT) Y Y emPAI 0.11 Strategy.Hits 2 2 3 5 42

\*Des: Type II keratin Kb15

| SEQUEST:(PepMatched Observed.Hits Coverage) |        |            |            | 2            | 1                | 4.8%  |    |  |  |
|---------------------------------------------|--------|------------|------------|--------------|------------------|-------|----|--|--|
| Seq                                         | Charge | Xcor       | Delta      | Proability   | PepHits          |       |    |  |  |
| SRAEAEWYQTK                                 | +2     |            | 3.309      | 0.379        | 0.9972           | 1     |    |  |  |
| SLDLDSIIAEVK                                | +2     |            | 4.329      | 0.469        | 1.0000           | 5     |    |  |  |
| MASCOT:(PepMatched Observed.Hits Coverage)  |        |            |            | 3            | 5                | 7.02% |    |  |  |
| Seq                                         | Charge | ObservedMS | ExpectedMS | CalculatedMS | Pepscore PepHits |       |    |  |  |
| FLEQQNKVLETK                                | +2     | 739.8685   | 1477.7225  | 1475.7983    | 1.92             | 60    | 6  |  |  |
| LALDIEIATYR                                 | +2     | 639.3679   | 1276.7213  | 1276.7027    | 0.02             | 58    | 17 |  |  |

Identified Human Platelet Proteins

SLDLDSIIAEVK +2 651.8712 1301.7279 1301.7078 0.02 48 5

No. Protein Matched (SEQUEST MASCOT) emPAI Strategy.Hits PepMatched(SEQUEST MASCOT) SpectraMatched(SEQUEST MASCOT)  
 331. IPI00361908 N Y 0.24 1 0 2 0 16

\*Des: 26 kDa protein

SEQUEST:(PepMatched Observed.Hits Coverage)

MASCOT:(PepMatched Observed.Hits Coverage) 2 1 11.25%

| Seq            | Charge | ObservedMS | ExpectedMS | CalculatedMS | Pepscore | PepHits |
|----------------|--------|------------|------------|--------------|----------|---------|
| LEGFQTQISK     | +2     | 575.81     | 1149.61    | 1149.60      | 0.01     | 50 4    |
| IEDGNNFGVAVQEK | +2     | 760.38     | 1518.74    | 1518.73      | 0.01     | 82 14   |

No. Protein Matched (SEQUEST MASCOT) emPAI Strategy.Hits PepMatched(SEQUEST MASCOT) SpectraMatched(SEQUEST MASCOT)  
 332. IPI00190020 Y Y 0.02 1 2 2 2 4

\*Des: Splice Isoform SERCA2B of Sarcoplasmic/endoplasmic reticulum calcium ATPase 2

SEQUEST:(PepMatched Observed.Hits Coverage) 2 1 3.1%

| Seq             | Charge | Xcor | Delta | Proability | PepHits        |
|-----------------|--------|------|-------|------------|----------------|
| VDQSILTGESVSVIK | +2     |      | 3.767 | 0.442      | 0.9990 2       |
| AFTGREFDELSPAQR |        |      | +3    | 3.353      | 0.277 0.9841 2 |

MASCOT:(PepMatched Observed.Hits Coverage) 2 1 2.35%

| Seq           | Charge | ObservedMS | ExpectedMS | CalculatedMS | Pepscore | PepHits |
|---------------|--------|------------|------------|--------------|----------|---------|
| IGIFGQDEDVTSK | +2     | 704.8573   | 1407.7000  | 1407.6881    | 0.01     | 48 2    |
| EWGSGSDTLR    | +2     | 554.2618   | 1106.5090  | 1106.4992    | 0.01     | 43 4    |

No. Protein Matched (SEQUEST MASCOT) emPAI Strategy.Hits PepMatched(SEQUEST MASCOT) SpectraMatched(SEQUEST MASCOT)  
 333. IPI00557102 N Y 0.43 1 0 3 0 13

\*Des: 45 kDa protein

SEQUEST:(PepMatched Observed.Hits Coverage)

MASCOT:(PepMatched Observed.Hits Coverage) 3 1 13.71%

| Seq                          | Charge | ObservedMS | ExpectedMS | CalculatedMS | Pepscore | PepHits           |
|------------------------------|--------|------------|------------|--------------|----------|-------------------|
| DNSDRPPLQEGALPQMLPGHSGPSGTNR |        |            | +3         | 976.81       | 2927.41  | 2927.39 0.02 50 5 |
| TSYFIEFSVR                   | +2     | 625.35     | 1248.69    | 1247.62      | 1.07     | 47 8              |
| FPQVSNFFEHTPPK               | +2     | 837.92     | 1673.82    | 1673.82      | 0        | 64 8              |

No. Protein Matched (SEQUEST MASCOT) emPAI Strategy.Hits PepMatched(SEQUEST MASCOT) SpectraMatched(SEQUEST MASCOT)  
 334. IPI00191761 N Y 0.87 1 0 3 0 6

\*Des: PREDICTED: similar to Rab5c protein

SEQUEST:(PepMatched Observed.Hits Coverage)

MASCOT:(PepMatched Observed.Hits Coverage) 3 1 19.54%

| Seq            | Charge | ObservedMS | ExpectedMS | CalculatedMS | Pepscore | PepHits |
|----------------|--------|------------|------------|--------------|----------|---------|
| GVDLQESNPASR   | +2     | 636.8572   | 1271.6998  | 1271.6106    | 0.09     | 64 2    |
| QASPNIVIALAGNK | +2     | 698.4429   | 1394.8712  | 1394.7881    | 0.08     | 53 2    |
| TAMNVNEIFMAIAK | +2     | 776.9560   | 1551.8974  | 1551.7789    | 0.12     | 79 2    |

No. Protein Matched (SEQUEST MASCOT) emPAI Strategy.Hits PepMatched(SEQUEST MASCOT) SpectraMatched(SEQUEST MASCOT)  
 335. IPI00212655 Y Y 0.41 4 2 2 3 56

\*Des: Guanine nucleotide-binding protein G(I)/G(S)/G(T) beta subunit 1

SEQUEST:(PepMatched Observed.Hits Coverage) 2 1 6.93%

| Identified Human Platelet Proteins |                                                               |                          |            |               |                            |                                |        |          |         |  |
|------------------------------------|---------------------------------------------------------------|--------------------------|------------|---------------|----------------------------|--------------------------------|--------|----------|---------|--|
| No.                                | Protein                                                       | Matched (SEQUEST MASCOT) | emPAI      | Strategy.Hits | PepMatched(SEQUEST MASCOT) | SpectraMatched(SEQUEST MASCOT) |        |          |         |  |
| 336.                               | IPI00361693                                                   | Y                        | Y          | 1             | 3                          | 7                              | 8      | 22       | 19      |  |
| *Des:                              | Protein tyrosine kinase 9                                     |                          |            |               |                            |                                |        |          |         |  |
|                                    | SEQUEST:(PepMatched Observed.Hits Coverage)                   |                          |            |               | 7                          | 5                              | 32.02% |          |         |  |
|                                    | Seq                                                           | Charge                   | Xcor       | Delta         | Probility                  | PepHits                        |        |          |         |  |
|                                    | IEVQTDVSVDTK                                                  | +2                       |            | 4.758         | 0.502                      | 1.0000                         | 8      |          |         |  |
|                                    | EFGGGHIKDEVFGTVK                                              | +2                       |            | 4.313         | 0.485                      | 1.0000                         | 5      |          |         |  |
|                                    | NETIILANTENTELK                                               | +2                       |            | 5.007         | 0.414                      | 0.9998                         | 2      |          |         |  |
|                                    | HQTLQGVAFPISR                                                 | +2                       |            | 3.668         | 0.544                      | 1.0000                         | 4      |          |         |  |
|                                    | SPLLDIVER                                                     | +2                       |            | 3.282         | 0.351                      | 0.9991                         | 3      |          |         |  |
|                                    | YLLSQSSPAPLTAAEEELR                                           | +2                       |            | 5.423         | 0.578                      | 1.0000                         | 6      |          |         |  |
|                                    | KIEIDNGDELTAFLYDEVHPK                                         | +3                       |            | 6.246         | 0.592                      | 1.0000                         | 3      |          |         |  |
|                                    | MASCOT:(PepMatched Observed.Hits Coverage)                    |                          |            |               | 8                          | 2                              | 35.67% |          |         |  |
|                                    | Seq                                                           | Charge                   | ObservedMS | ExpectedMS    | CalculatedMS               |                                |        | Pepscore | PepHits |  |
|                                    | IEVQTDVSVDTK                                                  | +2                       | 710.87     | 1419.72       | 1419.71                    | 0.01                           | 111    | 5        |         |  |
|                                    | HQTLQGVAFPISR                                                 | +2                       | 727.40     | 1452.80       | 1452.78                    | 0.02                           | 60     | 4        |         |  |
|                                    | NETIILANTENTELK                                               | +2                       | 851.95     | 1701.89       | 1701.88                    | 0.01                           | 91     | 2        |         |  |
|                                    | EFGGGHIKDEVFGTVK                                              | +2                       | 860.45     | 1718.88       | 1718.86                    | 0.02                           | 59     | 5        |         |  |
|                                    | SPLLDIVER                                                     | +2                       | 521.30     | 1040.59       | 1040.59                    | 0                              | 51     | 2        |         |  |
|                                    | QLNYVQLEIDIK                                                  | +2                       | 738.72     | 1475.42       | 1474.80                    | 0.62                           | 53     | 1        |         |  |
|                                    | YLLSQSSPAPLTAAEEELR                                           | +3                       | 692.70     | 2075.08       | 2074.06                    | 1.02                           | 48     | 3        |         |  |
|                                    | KIEIDNGDELTAFLYDEVHPK                                         | +3                       | 854.42     | 2560.25       | 2560.23                    | 0.02                           | 88     | 6        |         |  |
| 337.                               | IPI00339167                                                   | Y                        | Y          | 1.04          | 4                          | 3                              | 13     | 56       | 643     |  |
| *Des:                              | PREDICTED: similar to Tubulin alpha-2 chain (Alpha-tubulin 2) |                          |            |               |                            |                                |        |          |         |  |
|                                    | SEQUEST:(PepMatched Observed.Hits Coverage)                   |                          |            |               | 3                          | 2                              | 6.5%   |          |         |  |
|                                    | Seq                                                           | Charge                   | Xcor       | Delta         | Probility                  | PepHits                        |        |          |         |  |
|                                    | SIQFVDWCPTGFK                                                 | +2                       |            | 4.812         | 0.588                      | 0.9542                         | 7      |          |         |  |
|                                    | LISQIVSSITASLR                                                | +3                       |            | 5.122         | 0.352                      | 1.0000                         | 66     |          |         |  |
|                                    | RSIQFVDWCPTGFK                                                | +2                       |            | 3.004         | 0.260                      | 0.9818                         | 8      |          |         |  |
|                                    | MASCOT:(PepMatched Observed.Hits Coverage)                    |                          |            |               | 13                         | 6                              | 31.88% |          |         |  |
|                                    | Seq                                                           | Charge                   | ObservedMS | ExpectedMS    | CalculatedMS               |                                |        | Pepscore | PepHits |  |
|                                    | DVNAAIATIK                                                    | +2                       | 508.2954   | 1014.5763     | 1014.5709                  | 0.01                           | 76     | 66       |         |  |
|                                    | EIIDLVLDLDR                                                   | +2                       | 542.7372   | 1083.4598     | 1084.6128                  | -1.14                          | 53     | 42       |         |  |
|                                    | AVFVDLEPTVIDEVR                                               | +2                       | 851.4640   | 1700.9134     | 1700.8984                  | 0.01                           | 93     | 136      |         |  |
|                                    | NLDIERPTYTNLNR                                                | +2                       | 859.9511   | 1717.8877     | 1717.8747                  | 0.01                           | 58     | 63       |         |  |
|                                    | AVCMLSNTTAIAEAWAR                                             | +2                       | 904.4519   | 1806.8893     | 1806.8756                  | 0.01                           | 70     | 9        |         |  |
|                                    | SIQFVDWCPTGFK                                                 | +2                       | 764.3749   | 1526.7352     | 1526.7227                  | 0.01                           | 78     | 10       |         |  |

**Identified Human Platelet Proteins**

|                    |          |           |           |           |      |     |     |
|--------------------|----------|-----------|-----------|-----------|------|-----|-----|
| GHYTIGKEIIDLVLDLDR | +3       | 614.6802  | 1841.0187 | 1841.0046 | 0.01 | 76  | 6   |
| RSIQFVDWCPTGFK +2  | 842.4284 | 1682.8423 | 1682.8239 | 0.02      | 61   | 23  |     |
| VGINYQPPTVVPGDLAK  | +2       | 913.0029  | 1823.9912 | 1823.9781 | 0.01 | 90  | 109 |
| LISQIVSSITASLR +2  | 744.4479 | 1486.8812 | 1486.8719 | 0.01      | 95   | 181 |     |
| DVNAAIATIKTKR +2   | 700.8766 | 1399.7387 | 1399.8147 | -0.07     | 45   | 6   |     |
| RNLDIRPTYTNLNR+2   | 938.0027 | 1873.9909 | 1873.9758 | 0.02      | 51   | 16  |     |
| IHFPLATYAPVISA EK  | +2       | 878.9921  | 1755.9696 | 1755.9559 | 0.01 | 94  | 272 |

|          |                                               |                          |         |               |                            |                                |
|----------|-----------------------------------------------|--------------------------|---------|---------------|----------------------------|--------------------------------|
| No. 338. | Protein                                       | Matched (SEQUEST MASCOT) | emPAI   | Strategy.Hits | PepMatched(SEQUEST MASCOT) | SpectraMatched(SEQUEST MASCOT) |
|          | IPI00210115                                   | Y Y                      | 0.44    | 1             | 5 2 7                      | 4                              |
| *Des:    | SNAP-29 protein                               |                          |         |               |                            |                                |
|          | SEQUEST:(PepMatched Observed.Hits Coverage)   | 5                        | 1       | 32.06%        |                            |                                |
|          | Seq Charge Xcor Delta Probility PepHits       |                          |         |               |                            |                                |
|          | DLPDGPDAPIDR +2                               | 2.962                    | 0.398   | 0.9970        | 3                          |                                |
|          | IGVASSEELVR +2                                | 3.533                    | 0.446   | 0.9995        | 3                          |                                |
|          | LHDAELDSVPASTVNTEVYPK +2                      | 4.874                    | 0.599   | 1.0000        | 1                          |                                |
|          | IDSNLDELSVGLGR +2                             | 3.874                    | 0.492   | 0.9997        | 1                          |                                |
|          | SKPVEPPPEQNGSIVPQPSSR +3                      | 4.578                    | 0.419   | 0.9997        | 2                          |                                |
|          | MASCOT:(PepMatched Observed.Hits Coverage)    | 2                        | 1       | 10.3%         |                            |                                |
|          | Seq Charge ObservedMS ExpectedMS CalculatedMS |                          |         |               |                            | Pepscore PepHits               |
|          | IGVASSEELVR +2                                | 580.32                   | 1158.63 | 1158.62       | 0.01 70                    | 3                              |
|          | IDSNLDELSVGLGR +2                             | 744.39                   | 1486.77 | 1486.76       | 0.01 74                    | 1                              |

|          |                                               |                          |         |               |                            |                                |
|----------|-----------------------------------------------|--------------------------|---------|---------------|----------------------------|--------------------------------|
| No. 339. | Protein                                       | Matched (SEQUEST MASCOT) | emPAI   | Strategy.Hits | PepMatched(SEQUEST MASCOT) | SpectraMatched(SEQUEST MASCOT) |
|          | IPI00203690                                   | Y Y                      | 0.18    | 1             | 2 2 4                      | 2                              |
| *Des:    | 4-trimethylaminobutyraldehyde dehydrogenase   |                          |         |               |                            |                                |
|          | SEQUEST:(PepMatched Observed.Hits Coverage)   | 2                        | 1       | 7.11%         |                            |                                |
|          | Seq Charge Xcor Delta Probility PepHits       |                          |         |               |                            |                                |
|          | VSFTGSVPTGMK +2                               | 2.934                    | 0.517   | 0.9998        | 2                          |                                |
|          | EEIFGPVMSILTFETEAEVLER +2                     | 5.590                    | 0.687   | 1.0000        | 4                          |                                |
|          | MASCOT:(PepMatched Observed.Hits Coverage)    | 2                        | 1       | 4.74%         |                            |                                |
|          | Seq Charge ObservedMS ExpectedMS CalculatedMS |                          |         |               |                            | Pepscore PepHits               |
|          | VSFTGSVPTGMK +2                               | 605.81                   | 1209.61 | 1209.61       | 0 47                       | 2                              |
|          | VTIEYYSQLK +2                                 | 622.34                   | 1242.66 | 1242.65       | 0.01 41                    | 2                              |

|          |                                             |                          |       |               |                            |                                |
|----------|---------------------------------------------|--------------------------|-------|---------------|----------------------------|--------------------------------|
| No. 340. | Protein                                     | Matched (SEQUEST MASCOT) | emPAI | Strategy.Hits | PepMatched(SEQUEST MASCOT) | SpectraMatched(SEQUEST MASCOT) |
|          | IPI00192639                                 | Y N                      | 0.27  | 2             | 3 0 3                      | 0                              |
| *Des:    | 63 kDa protein                              |                          |       |               |                            |                                |
|          | SEQUEST:(PepMatched Observed.Hits Coverage) | 3                        | 2     | 10.63%        |                            |                                |
|          | Seq Charge Xcor Delta Probility PepHits     |                          |       |               |                            |                                |
|          | IDQLQEELLHTQLK +3                           | 3.119                    | 0.314 | 0.9980        | 1                          |                                |
|          | SIVTDLVSQMDPHGR +3                          | 3.414                    | 0.423 | 0.9998        | 1                          |                                |
|          | SLIDMYSEVLVDVLSYDASYNTQDHLPR +3             | 4.318                    | 0.461 | 0.9999        | 1                          |                                |
|          | MASCOT:(PepMatched Observed.Hits Coverage)  |                          |       |               |                            |                                |

|          |             |                          |       |               |                            |                                |
|----------|-------------|--------------------------|-------|---------------|----------------------------|--------------------------------|
| No. 341. | Protein     | Matched (SEQUEST MASCOT) | emPAI | Strategy.Hits | PepMatched(SEQUEST MASCOT) | SpectraMatched(SEQUEST MASCOT) |
|          | IPI00421560 | Y Y                      | 0.14  | 1             | 3 13 5                     | 19                             |

Identified Human Platelet Proteins

\*Des: Actn4 protein

| SEQUEST:(PepMatched Observed.Hits Coverage) |        |            |            |              |          |         |   |  |  |
|---------------------------------------------|--------|------------|------------|--------------|----------|---------|---|--|--|
| Seq                                         | Charge | Xcor       | Delta      | Proability   | PepHits  |         |   |  |  |
| MLDAEDIVNTARPDEK                            |        |            | +2         | 3.916        | 0.381    | 0.9994  | 2 |  |  |
| ETDTDADQVIASFK                              |        |            | +2         | 4.500        | 0.589    | 1.0000  | 1 |  |  |
| IMSVVDPNHSGLVTFQAFIDFMSR                    |        |            | +3         | 4.301        | 0.564    | 1.0000  | 2 |  |  |
| MASCOT:(PepMatched Observed.Hits Coverage)  |        |            |            |              |          |         |   |  |  |
| Seq                                         | Charge | ObservedMS | ExpectedMS | CalculatedMS | Pepscore | PepHits |   |  |  |
| MAPYQGPDAAPGALDYK                           | +2     | 882.92     | 1763.83    | 1763.82      | 0.01     | 56      | 2 |  |  |
| NVNVQNFHISWK                                | +2     | 743.39     | 1484.76    | 1484.75      | 0.01     | 62      | 1 |  |  |
| LVSIGAEIIVDGNK                              | +2     | 757.91     | 1513.81    | 1513.80      | 0.01     | 93      | 1 |  |  |
| QLETIDQLHLEYAK                              | +2     | 850.95     | 1699.89    | 1699.88      | 0.01     | 66      | 2 |  |  |
| ETDTDADQVIASFK                              | +2     | 871.41     | 1740.81    | 1740.81      | 0        | 56      | 1 |  |  |
| MLDAEDIVNTARPDEK                            | +2     | 908.95     | 1815.88    | 1815.87      | 0.01     | 66      | 2 |  |  |
| KDDPVTNLNNAFEVAEK                           | +2     | 952.48     | 1902.94    | 1902.93      | 0.01     | 93      | 2 |  |  |
| LSGSNPYTSVTPQIINSK                          | +2     | 953.51     | 1905.01    | 1904.98      | 0.03     | 62      | 2 |  |  |
| AGTQIENIDEDFRDGLK                           | +2     | 960.97     | 1919.93    | 1919.92      | 0.01     | 70      | 1 |  |  |
| QFASQANMVGPIWTK                             | +2     | 903.46     | 1804.91    | 1804.89      | 0.02     | 51      | 2 |  |  |
| LMLLLEVISGERLPKPER                          | +3     | 698.41     | 2092.21    | 2092.21      | 0        | 42      | 1 |  |  |
| IMSVVDPNHSGLVTFQAFIDFMSR                    | +3     | 904.46     | 2710.36    | 2710.32      | 0.04     | 54      | 2 |  |  |
| VEQIAIAQELNELDYDShNVNTR                     | +3     | 969.14     | 2904.39    | 2904.39      | 0        | 52      | 2 |  |  |

No. 342. Protein IPI00200425 Matched (SEQUEST MASCOT) Y Y emPAI Strategy.Hits 0.64 4 4 PepMatched(SEQUEST MASCOT) 4 5 SpectraMatched(SEQUEST MASCOT) 7 17

\*Des: Ras-related protein Rab-27B

| SEQUEST:(PepMatched Observed.Hits Coverage) |        |            |            |              |          |         |   |  |  |
|---------------------------------------------|--------|------------|------------|--------------|----------|---------|---|--|--|
| Seq                                         | Charge | Xcor       | Delta      | Proability   | PepHits  |         |   |  |  |
| VVYDTQGADGSSGK                              | +2     | 3.930      | 0.630      | 1.0000       | 4        |         |   |  |  |
| YGIPYFETSAATGQNVEK                          | +2     | 3.627      | 0.357      | 0.9955       | 1        |         |   |  |  |
| SVETLLDLIMK                                 | +2     | 2.934      | 0.490      | 0.9990       | 6        |         |   |  |  |
| DAMGFLMFDLTSQQSFLNVR                        | +3     | 4.421      | 0.331      | 0.9993       | 1        |         |   |  |  |
| MASCOT:(PepMatched Observed.Hits Coverage)  |        |            |            |              |          |         |   |  |  |
| Seq                                         | Charge | ObservedMS | ExpectedMS | CalculatedMS | Pepscore | PepHits |   |  |  |
| LLALGDSGVGK                                 | +2     | 515.3329   | 1028.6512  | 1028.5865    | 0.06     | 54      | 2 |  |  |
| TQVPDTVNGVNSGK                              | +2     | 708.4145   | 1414.8144  | 1414.7052    | 0.11     | 60      | 1 |  |  |
| LLALGDSGVGKTTFLYR                           | +3     | 604.3787   | 1810.1143  | 1809.9988    | 0.12     | 40      | 1 |  |  |
| YGIPYFETSAATGQNVEK                          | +2     | 988.0485   | 1974.0824  | 1973.9370    | 0.15     | 51      | 1 |  |  |
| ELAKEYGIPYFETSAATGQNVEK                     | +3     | 849.1462   | 2544.4168  | 2544.2383    | 0.18     | 78      | 1 |  |  |

No. 343. Protein IPI00326135 Matched (SEQUEST MASCOT) N Y emPAI Strategy.Hits 0.02 1 0 PepMatched(SEQUEST MASCOT) 2 0 SpectraMatched(SEQUEST MASCOT) 4

\*Des: Apoptosis-inducing factor

| MASCOT:(PepMatched Observed.Hits Coverage) |        |            |            |              |          |         |   |  |  |
|--------------------------------------------|--------|------------|------------|--------------|----------|---------|---|--|--|
| Seq                                        | Charge | ObservedMS | ExpectedMS | CalculatedMS | Pepscore | PepHits |   |  |  |
| TGGLEIDSDFGGFR                             | +2     | 735.8578   | 1469.7011  | 1469.6786    | 0.02     | 64      | 2 |  |  |
| DGEQHEDLNEVAK                              | +2     | 742.3489   | 1482.6833  | 1482.6586    | 0.02     | 59      | 2 |  |  |



Identified Human Platelet Proteins

No. 344. Protein IPI00325260 Matched (SEQUEST MASCOT) N Y emPAI Strategy.Hits 0.24 1 PepMatched(SEQUEST MASCOT) 0 SpectraMatched(SEQUEST MASCOT) 2

\*Des: Small glutamine-rich tetratricopeptide repeat-containing protein A

SEQUEST:(PepMatched Observed.Hits Coverage)

MASCOT:(PepMatched Observed.Hits Coverage)

| Seq           | Charge | ObservedMS | ExpectedMS | CalculatedMS | PepScore | PepHits |
|---------------|--------|------------|------------|--------------|----------|---------|
| MGLALSSLNK    | +2     | 517.29     | 1032.57    | 1032.56      | 0.01     | 44      |
| LAYAIQFLHGQLR | +3     | 548.32     | 1641.93    | 1641.94      | 0        | 43      |

No. 345. Protein IPI00470301 Matched (SEQUEST MASCOT) Y Y emPAI Strategy.Hits 0.27 2 PepMatched(SEQUEST MASCOT) 5 SpectraMatched(SEQUEST MASCOT) 16

\*Des: Chaperonin containing TCP1, subunit 5

SEQUEST:(PepMatched Observed.Hits Coverage)

MASCOT:(PepMatched Observed.Hits Coverage)

| Seq               | Charge | Xcor  | Delta | Probability | PepHits | PepScore | PepHits |
|-------------------|--------|-------|-------|-------------|---------|----------|---------|
| IADGYEQAAR        | +2     | 3.655 | 0.494 | 1.0000      | 5       |          |         |
| WVGGPEIELIAIATGGR | +2     | 4.123 | 0.551 | 1.0000      | 4       |          |         |
| FSELTSEKLGFAVVR   | +3     | 3.216 | 0.471 | 1.0000      | 1       |          |         |
| KQISLATQMVR       | +2     | 2.783 | 0.327 | 0.9919      | 1       |          |         |
| GVIVDKDFSHPQMPK   | +2     | 4.717 | 0.464 | 1.0000      | 7       |          |         |

  

| Seq               | Charge | ObservedMS | ExpectedMS | CalculatedMS | PepScore | PepHits |
|-------------------|--------|------------|------------|--------------|----------|---------|
| IADGYEQAAR        | +2     | 547.2702   | 1092.5259  | 1092.5199    | 0.01     | 90      |
| WVGGPEIELIAIATGGR | +2     | 869.9867   | 1737.9588  | 1737.9413    | 0.02     | 74      |
| LGFAVVR           | +2     | 409.7500   | 817.4855   | 817.4810     | 0        | 50      |
| KQISLATQMVR       | +2     | 701.8990   | 1401.7834  | 1401.7762    | 0.01     | 57      |
| GVIVDKDFSHPQMPK   | +2     | 849.4361   | 1696.8576  | 1696.8606    | 0        | 70      |

No. 346. Protein IPI00421565 Matched (SEQUEST MASCOT) N Y emPAI Strategy.Hits 0.22 1 PepMatched(SEQUEST MASCOT) 0 SpectraMatched(SEQUEST MASCOT) 17

\*Des: GDP dissociation inhibitor 2

SEQUEST:(PepMatched Observed.Hits Coverage)

MASCOT:(PepMatched Observed.Hits Coverage)

| Seq                       | Charge | ObservedMS | ExpectedMS | CalculatedMS | PepScore | PepHits |
|---------------------------|--------|------------|------------|--------------|----------|---------|
| YIAIVSTTVETK              | +2     | 662.87     | 1323.73    | 1323.73      | 0        | 48      |
| DLGTDSQIFISR              | +2     | 676.35     | 1350.68    | 1350.68      | 0        | 63      |
| VLHMDQNPYYGGESASITPLEDLYK | +3     | 947.46     | 2839.35    | 2839.34      | 0.01     | 53      |
| VPSTEAEALASSLMGLFEK       | +2     | 990.51     | 1979.00    | 1978.99      | 0.01     | 87      |
| FDLGQDVIDFTGHSLALYR       | +3     | 723.03     | 2166.08    | 2166.07      | 0.01     | 66      |

No. 347. Protein IPI00198520 Matched (SEQUEST MASCOT) N Y emPAI Strategy.Hits 0.24 1 PepMatched(SEQUEST MASCOT) 0 SpectraMatched(SEQUEST MASCOT) 7

\*Des: Cortactin isoform B

SEQUEST:(PepMatched Observed.Hits Coverage)

MASCOT:(PepMatched Observed.Hits Coverage)

| Seq           | Charge | ObservedMS | ExpectedMS | CalculatedMS | PepScore | PepHits |
|---------------|--------|------------|------------|--------------|----------|---------|
| VDQSAVGFEYQGK | +2     | 714.34     | 1426.67    | 1426.67      | 0        | 65      |

Identified Human Platelet Proteins

NASTFEEVVQVPSAYQK +2 948.97 1895.93 1895.93 0 67 4

No. 348. Protein IPI00364311 Matched (SEQUEST MASCOT) Y Y emPAI 0.52 Strategy.Hits 2 PepMatched(SEQUEST MASCOT) 8 SpectraMatched(SEQUEST MASCOT) 7 32 28

\*Des: Glucose phosphate isomerase

SEQUEST:(PepMatched Observed.Hits Coverage) 8 3 24.29%

| Seq                           | Charge | Xcor | Delta | Proability | PepHits  |
|-------------------------------|--------|------|-------|------------|----------|
| TFTTQETITNAETAK               | +2     |      | 5.026 | 0.544      | 1.0000 1 |
| FAAYFQQGDMESNGK               | +2     |      | 4.548 | 0.585      | 1.0000 1 |
| EVLHMLVDLAK                   | +2     |      | 2.881 | 0.418      | 0.9990 2 |
| TLANLNPESSLFIIASK             | +2     |      | 4.045 | 0.464      | 0.9999 2 |
| AITDIINIGIGGSDLGPLMVTEALKPYSK | +3     |      | 4.680 | 0.589      | 1.0000 1 |
| NMFEFWDWVGGR                  | +2     |      | 3.762 | 0.525      | 1.0000 1 |
| ILLANFLAQTEALMK+2             | +2     |      | 5.208 | 0.535      | 1.0000 4 |
| LTPFILGALIAMYEHK              | +2     |      | 4.579 | 0.560      | 1.0000 3 |

MASCOT:(PepMatched Observed.Hits Coverage) 7 4 22.18%

| Seq                           | Charge | ObservedMS | ExpectedMS | CalculatedMS | Pepscore | PepHits |
|-------------------------------|--------|------------|------------|--------------|----------|---------|
| TFTTQETITNAETAK               | +2     | 828.41     | 1654.81    | 1654.80      | 0.01     | 90 1    |
| FAAYFQQGDMESNGK               | +2     | 846.87     | 1691.73    | 1691.72      | 0.01     | 90 1    |
| TLANLNPESSLFIIASK             | +2     | 909.51     | 1817.00    | 1816.99      | 0.01     | 50 2    |
| NMFEFWDWVGGR                  | +2     | 772.35     | 1542.68    | 1542.67      | 0.01     | 44 1    |
| ILLANFLAQTEALMK+2             | +2     | 838.48     | 1674.95    | 1674.94      | 0.01     | 99 4    |
| LTPFILGALIAMYEHK              | +2     | 909.01     | 1816.00    | 1816.00      | 0        | 70 3    |
| AITDIINIGIGGSDLGPLMVTEALKPYSK | +3     | 996.22     | 2985.63    | 2985.61      | 0.02     | 83 1    |

No. 349. Protein IPI00373134 Matched (SEQUEST MASCOT) Y N emPAI 0.32 Strategy.Hits 1 PepMatched(SEQUEST MASCOT) 3 SpectraMatched(SEQUEST MASCOT) 0 4 0

\*Des: PREDICTED: similar to RIKEN cDNA B430104H02

SEQUEST:(PepMatched Observed.Hits Coverage) 3 1 13.22%

| Seq                 | Charge | Xcor | Delta | Proability | PepHits  |
|---------------------|--------|------|-------|------------|----------|
| VNGEIVQSSNTNQMVFK   | +2     |      | 4.977 | 0.519      | 1.0000 1 |
| ALAAQLPLIPR         | +2     |      | 2.766 | 0.423      | 0.9974 2 |
| FSSSIVGPYDSIILPPESK | +2     |      | 3.577 | 0.507      | 0.9996 2 |

MASCOT:(PepMatched Observed.Hits Coverage)

No. 350. Protein IPI00372407 Matched (SEQUEST MASCOT) Y Y emPAI 0.17 Strategy.Hits 1 PepMatched(SEQUEST MASCOT) 2 SpectraMatched(SEQUEST MASCOT) 2 6 5

\*Des: PREDICTED: similar to apoA-I binding protein

SEQUEST:(PepMatched Observed.Hits Coverage) 2 1 4.27%

| Seq                | Charge | Xcor | Delta | Proability | PepHits  |
|--------------------|--------|------|-------|------------|----------|
| LFGYQPTIYYPK       | +2     |      | 3.693 | 0.419      | 0.9999 4 |
| GNPSGIQPDLLISLTAPK | +2     |      | 4.556 | 0.646      | 1.0000 4 |

MASCOT:(PepMatched Observed.Hits Coverage) 2 1 4.27%

| Seq                | Charge | ObservedMS | ExpectedMS | CalculatedMS | Pepscore | PepHits |
|--------------------|--------|------------|------------|--------------|----------|---------|
| LFGYQPTIYYPK       | +2     | 745.40     | 1488.78    | 1488.77      | 0.01     | 53 3    |
| GNPSGIQPDLLISLTAPK | +2     | 911.02     | 1820.02    | 1820.00      | 0.02     | 85 4    |

**Identified Human Platelet Proteins**

| No.   | Protein                                                                         | Matched (SEQUEST MASCOT) | emPAI      | Strategy.Hits | PepMatched(SEQUEST MASCOT) | SpectraMatched(SEQUEST MASCOT) |
|-------|---------------------------------------------------------------------------------|--------------------------|------------|---------------|----------------------------|--------------------------------|
| 351.  | IPI00197727                                                                     | Y N                      | 0.94       | 1             | 2 0 2 0                    |                                |
| *Des: | Protein phosphatase 1 regulatory subunit 14A                                    |                          |            |               |                            |                                |
|       | SEQUEST:(PepMatched Observed.Hits Coverage)                                     |                          |            | 2             | 1                          | 9.33%                          |
|       | Seq                                                                             | Charge Xcor              | Delta      | Probility     | PepHits                    |                                |
|       | GPGGSPSGLQK                                                                     | +2                       | 2.819      | 0.386         | 0.9964 4                   |                                |
|       | ARGPGGSPSGLQK                                                                   | +2                       | 3.031      | 0.320         | 0.9714 6                   |                                |
|       | MASCOT:(PepMatched Observed.Hits Coverage)                                      |                          |            |               |                            |                                |
| 352.  | IPI00366856                                                                     | Y N                      | 1.01       | 2             | 4 0 8 0                    |                                |
| *Des: | 18 kDa protein                                                                  |                          |            |               |                            |                                |
|       | SEQUEST:(PepMatched Observed.Hits Coverage)                                     |                          |            | 4             | 4                          | 33.12%                         |
|       | Seq                                                                             | Charge Xcor              | Delta      | Probility     | PepHits                    |                                |
|       | YALYDASFETK                                                                     | +2                       | 2.902      | 0.720         | 0.9984 2                   |                                |
|       | LGGSLIVAFEGSP                                                                   | +2                       | 3.624      | 0.633         | 0.9948 2                   |                                |
|       | ESRKEELMFFLWAEQAPLK                                                             | +3                       | 5.496      | 0.741         | 1.0000 2                   |                                |
|       | TSIAEKLGGSLIVAFEGSP                                                             | +2                       | 4.700      | 0.706         | 1.0000 4                   |                                |
|       | MASCOT:(PepMatched Observed.Hits Coverage)                                      |                          |            |               |                            |                                |
| 353.  | IPI00365118                                                                     | Y Y                      | 0.79       | 1             | 3 2 6 4                    |                                |
| *Des: | PREDICTED: similar to transmembrane emp24 protein transport domain containing 7 |                          |            |               |                            |                                |
|       | SEQUEST:(PepMatched Observed.Hits Coverage)                                     |                          |            | 3             | 1                          | 19.56%                         |
|       | Seq                                                                             | Charge Xcor              | Delta      | Probility     | PepHits                    |                                |
|       | TVYFDFQVGEDPPLFPSENR                                                            | +2                       | 4.484      | 0.583         | 1.0000 1                   |                                |
|       | SVIDYQTHFR                                                                      | +2                       | 3.070      | 0.422         | 0.9997 6                   |                                |
|       | KQYDSFTFTASK                                                                    | +2                       | 3.380      | 0.427         | 0.9998 3                   |                                |
|       | MASCOT:(PepMatched Observed.Hits Coverage)                                      |                          |            | 2             | 1                          | 10.43%                         |
|       | Seq                                                                             | Charge ObservedMS        | ExpectedMS | CalculatedMS  | Pepscore PepHits           |                                |
|       | SVIDYQTHFR                                                                      | +2                       | 633.32     | 1264.63       | 1264.62                    | 0.01 56 4                      |
|       | KQYDSFTFTASK                                                                    | +2                       | 711.85     | 1421.69       | 1421.68                    | 0.01 46 2                      |
| 354.  | IPI00358691                                                                     | Y Y                      | 0.17       | 1             | 2 3 2 3                    |                                |
| *Des: | Epidermal growth factor receptor pathway substrate 15 isoform B                 |                          |            |               |                            |                                |
|       | SEQUEST:(PepMatched Observed.Hits Coverage)                                     |                          |            | 2             | 1                          | 3.84%                          |
|       | Seq                                                                             | Charge Xcor              | Delta      | Probility     | PepHits                    |                                |
|       | LQETAQLEESVESGK                                                                 | +2                       | 4.927      | 0.596         | 1.0000 1                   |                                |
|       | DQFALAFHLINQK                                                                   | +2                       | 4.219      | 0.385         | 0.9996 1                   |                                |
|       | MASCOT:(PepMatched Observed.Hits Coverage)                                      |                          |            | 3             | 1                          | 4.96%                          |
|       | Seq                                                                             | Charge ObservedMS        | ExpectedMS | CalculatedMS  | Pepscore PepHits           |                                |
|       | LQETAQLEESVESGK                                                                 | +2                       | 888.44     | 1774.86       | 1774.86                    | 0 79 1                         |
|       | LPVEILGR                                                                        | +2                       | 448.78     | 895.55        | 895.55                     | 0 56 1                         |
|       | DQFALAFHLINQK                                                                   | +2                       | 772.92     | 1543.83       | 1543.81                    | 0.02 81 1                      |
| No.   | Protein                                                                         | Matched (SEQUEST MASCOT) | emPAI      | Strategy.Hits | PepMatched(SEQUEST MASCOT) | SpectraMatched(SEQUEST MASCOT) |

| Identified Human Platelet Proteins |                                                            |                          |            |               |                            |                                |      |          |         |  |
|------------------------------------|------------------------------------------------------------|--------------------------|------------|---------------|----------------------------|--------------------------------|------|----------|---------|--|
| 355.                               | IPI00371462                                                | Y                        | Y          | 1.02          | 1                          | 5                              | 6    | 8        | 13      |  |
| *Des:                              | PREDICTED: similar to HSPC263                              |                          |            |               |                            |                                |      |          |         |  |
|                                    | SEQUEST:(PepMatched Observed.Hits Coverage)                |                          |            | 5             | 1                          | 24.84%                         |      |          |         |  |
|                                    | Seq                                                        | Charge                   | Xcor       | Delta         | Proability                 | PepHits                        |      |          |         |  |
|                                    | IQQEIAVQNPLVSR                                             | +2                       |            | 4.507         | 0.469                      | 0.9999                         | 2    |          |         |  |
|                                    | FFEHFIEGGR                                                 | +2                       |            | 3.244         | 0.416                      | 0.9995                         | 3    |          |         |  |
|                                    | AFGFSHLEALLDDSK                                            | +2                       |            | 4.394         | 0.505                      | 1.0000                         | 2    |          |         |  |
|                                    | QTSVADLLASFNDQSTSDYLVVYLR                                  | +3                       |            | 4.152         | 0.531                      | 1.0000                         | 1    |          |         |  |
|                                    | EYAEDDNIYQQK                                               | +2                       |            | 3.628         | 0.477                      | 0.9998                         | 2    |          |         |  |
|                                    | MASCOT:(PepMatched Observed.Hits Coverage)                 |                          |            | 6             | 1                          | 25.75%                         |      |          |         |  |
|                                    | Seq                                                        | Charge                   | ObservedMS | ExpectedMS    | CalculatedMS               |                                |      | Pepscore | PepHits |  |
|                                    | EYAEDDNIYQQK                                               | +2                       | 758.34     | 1514.66       | 1514.65                    | 0.01                           | 58   | 1        |         |  |
|                                    | GEGGTTNPHVFPGESEPK                                         | +2                       |            | 920.43        | 1838.85                    | 1838.84                        | 0.01 | 61       | 2       |  |
|                                    | LLTSGYLQR                                                  | +2                       | 525.80     | 1049.59       | 1049.59                    | 0                              | 54   | 9        |         |  |
|                                    | FFEHFIEGGR                                                 | +2                       | 619.80     | 1237.58       | 1237.59                    | 0                              | 48   | 2        |         |  |
|                                    | IQQEIAVQNPLVSR                                             | +2                       | 862.47     | 1722.93       | 1722.93                    | 0                              | 91   | 2        |         |  |
|                                    | AFGFSHLEALLDDSK                                            | +2                       |            | 825.42        | 1648.82                    | 1648.81                        | 0.01 | 62       | 2       |  |
| No.                                | Protein                                                    | Matched (SEQUEST MASCOT) | emPAI      | Strategy.Hits | PepMatched(SEQUEST MASCOT) | SpectraMatched(SEQUEST MASCOT) |      |          |         |  |
| 356.                               | IPI00231247                                                | Y                        | Y          | 0.26          | 2                          | 2                              | 3    | 4        |         |  |
| *Des:                              | Dual specificity mitogen-activated protein kinase kinase 1 |                          |            |               |                            |                                |      |          |         |  |
|                                    | SEQUEST:(PepMatched Observed.Hits Coverage)                |                          |            | 2             | 2                          | 6.26%                          |      |          |         |  |
|                                    | Seq                                                        | Charge                   | Xcor       | Delta         | Proability                 | PepHits                        |      |          |         |  |
|                                    | VGELKDDDFEK                                                | +2                       |            | 2.798         | 0.301                      | 0.9620                         | 2    |          |         |  |
|                                    | KLEEELELDEQQR                                              | +2                       |            | 3.846         | 0.426                      | 0.9998                         | 2    |          |         |  |
|                                    | MASCOT:(PepMatched Observed.Hits Coverage)                 |                          |            | 2             | 2                          | 6.26%                          |      |          |         |  |
|                                    | Seq                                                        | Charge                   | ObservedMS | ExpectedMS    | CalculatedMS               |                                |      | Pepscore | PepHits |  |
|                                    | VGELKDDDFEK                                                | +2                       | 647.8221   | 1293.6297     | 1293.6088                  | 0.02                           | 36   | 2        |         |  |
|                                    | KLEEELELDEQQR                                              | +2                       | 765.4079   | 1528.8012     | 1528.7733                  | 0.03                           | 88   | 2        |         |  |
| No.                                | Protein                                                    | Matched (SEQUEST MASCOT) | emPAI      | Strategy.Hits | PepMatched(SEQUEST MASCOT) | SpectraMatched(SEQUEST MASCOT) |      |          |         |  |
| 357.                               | IPI00365985                                                | Y                        | Y          | 0.39          | 5                          | 23                             | 21   | 49       | 48      |  |
| *Des:                              | PREDICTED: tumor rejection antigen gp96 (predicted)        |                          |            |               |                            |                                |      |          |         |  |
|                                    | SEQUEST:(PepMatched Observed.Hits Coverage)                |                          |            | 23            | 8                          | 40.83%                         |      |          |         |  |
|                                    | Seq                                                        | Charge                   | Xcor       | Delta         | Proability                 | PepHits                        |      |          |         |  |
|                                    | ELISNASDALDK                                               | +2                       |            | 3.914         | 0.495                      | 0.9999                         | 4    |          |         |  |
|                                    | SGYLLPDTK                                                  | +2                       |            | 2.714         | 0.426                      | 0.9991                         | 4    |          |         |  |
|                                    | FAFQAEVNR                                                  | +2                       |            | 3.193         | 0.465                      | 0.9998                         | 6    |          |         |  |
|                                    | NLLHVTDTGVMTR                                              | +3                       |            | 4.475         | 0.515                      | 1.0000                         | 6    |          |         |  |
|                                    | IYFMAGSSR                                                  | +2                       |            | 3.074         | 0.385                      | 0.9993                         | 4    |          |         |  |
|                                    | FQSSHSTDITSLDQYVER                                         | +2                       |            | 5.530         | 0.675                      | 1.0000                         | 5    |          |         |  |
|                                    | GVVDSDDLPLNVS                                              | +2                       |            | 4.414         | 0.425                      | 0.9999                         | 4    |          |         |  |
|                                    | ELISNASDALDKIR                                             | +2                       |            | 3.513         | 0.386                      | 0.9770                         | 1    |          |         |  |
|                                    | EEEAIQLDGLNASQIR                                           | +2                       |            | 4.901         | 0.429                      | 0.9999                         | 1    |          |         |  |
|                                    | EEASDYLELDTIK                                              | +2                       |            | 3.358         | 0.445                      | 0.9996                         | 3    |          |         |  |
|                                    | SILFVPTSAPR                                                | +2                       |            | 3.315         | 0.321                      | 0.9980                         | 4    |          |         |  |
|                                    | RVFITDDFHDMMPK                                             | +3                       |            | 2.779         | 0.403                      | 0.9994                         | 4    |          |         |  |

Identified Human Platelet Proteins

|                                            |        |            |            |              |       |    |  |          |         |
|--------------------------------------------|--------|------------|------------|--------------|-------|----|--|----------|---------|
| LISLTDENALAGNEELTVK                        | +2     | 6.702      | 0.546      | 1.0000       | 3     |    |  |          |         |
| TDDEVVQREEEAIQLDGLNASQIR                   | +3     | 5.324      | 0.441      | 0.9994       | 2     |    |  |          |         |
| ESDDPMAYIHFTAEGEVTFK                       | +3     | 3.158      | 0.499      | 0.9999       | 2     |    |  |          |         |
| EATEKEFEPLLNWMK                            | +2     | 4.271      | 0.436      | 0.9955       | 2     |    |  |          |         |
| TVWDWELMNDIKPIWQRPSK                       | +3     | 3.776      | 0.460      | 0.9999       | 2     |    |  |          |         |
| YSQFINFPIYVWSSK                            | +2     | 5.422      | 0.617      | 1.0000       | 3     |    |  |          |         |
| TVWDWELMNDIKPIWQR                          | +2     | 5.024      | 0.443      | 0.9996       | 1     |    |  |          |         |
| MTEAQEDGQSTSELIGQFVGFYSAFLVADK             | +3     | 6.962      | 0.670      | 1.0000       | 1     |    |  |          |         |
| VKEDEDDKTVMDLAVVLFETATLR                   | +2     | 6.538      | 0.600      | 1.0000       | 6     |    |  |          |         |
| DISTNYYASQK                                | +2     | 3.706      | 0.545      | 1.0000       | 3     |    |  |          |         |
| SGTSEFLNK                                  | +2     | 2.824      | 0.270      | 0.9923       | 2     |    |  |          |         |
| MASCOT:(PepMatched Observed.Hits Coverage) |        | 21         | 8          | 33.25%       |       |    |  |          |         |
| Seq                                        | Charge | ObservedMS | ExpectedMS | CalculatedMS |       |    |  | PepScore | PepHits |
| SGTSEFLNK                                  | +2     | 491.75     | 981.48     | 981.48       | 0     | 41 |  | 1        |         |
| LGVIEDHSNR                                 | +2     | 570.30     | 1138.58    | 1138.57      | 0.01  | 41 |  | 2        |         |
| ELISNASDALDK                               | +2     | 638.33     | 1274.64    | 1274.64      | 0     | 83 |  | 12       |         |
| DISTNYYASQK                                | +2     | 645.09     | 1288.17    | 1288.59      | -0.41 | 63 |  | 3        |         |
| SGYLLPDTK                                  | +2     | 497.27     | 992.53     | 992.52       | 0.01  | 42 |  | 4        |         |
| IYFMAGSSR                                  | +2     | 516.25     | 1030.49    | 1030.49      | 0     | 63 |  | 4        |         |
| FAFQAEVNR                                  | +2     | 541.28     | 1080.54    | 1080.54      | 0     | 64 |  | 7        |         |
| NLLHVTDTGVMTR                              | +2     | 757.40     | 1512.78    | 1512.77      | 0.01  | 74 |  | 6        |         |
| SILFVPTSAPR                                | +2     | 594.34     | 1186.67    | 1186.67      | 0     | 43 |  | 4        |         |
| GVVSDDDLPLNVS                              | +2     | 743.38     | 1484.75    | 1484.75      | 0     | 92 |  | 4        |         |
| EEASDYLELDTIK                              | +2     | 763.37     | 1524.73    | 1524.72      | 0.01  | 59 |  | 3        |         |
| ELISNASDALDKIR                             | +2     | 772.92     | 1543.83    | 1543.82      | 0.01  | 86 |  | 2        |         |
| EEEAIQLDGLNASQIR                           | +2     | 893.46     | 1784.90    | 1784.89      | 0.01  | 85 |  | 2        |         |
| FQSSHSTDITSLDQYVER                         | +3     | 750.69     | 2249.05    | 2249.03      | 0.02  | 60 |  | 3        |         |
| VFITDDFHDMMPK                              | +2     | 798.37     | 1594.72    | 1594.72      | 0     | 49 |  | 2        |         |
| RVFITDDFHDMMPK                             | +2     | 876.42     | 1750.82    | 1750.82      | 0     | 52 |  | 2        |         |
| TDDEVVQREEEAIQLDGLNASQIR                   | +3     | 910.12     | 2727.35    | 2727.33      | 0.02  | 60 |  | 60       | 1       |
| EATEKEFEPLLNWMK                            | +2     | 932.97     | 1863.92    | 1863.91      | 0.01  | 58 |  | 2        |         |
| YSQFINFPIYVWSSK                            | +2     | 939.98     | 1877.95    | 1877.94      | 0.01  | 84 |  | 3        |         |
| TVWDWELMNDIKPIWQRPSK                       | +3     | 848.11     | 2541.30    | 2541.28      | 0.02  | 57 |  | 1        |         |
| VKEDEDDKTVMDLAVVLFETATLR                   | +3     | 913.14     | 2736.40    | 2736.39      | 0.01  | 64 |  | 2        |         |

|       |                                             |                          |       |               |                            |                                |   |   |  |
|-------|---------------------------------------------|--------------------------|-------|---------------|----------------------------|--------------------------------|---|---|--|
| No.   | Protein                                     | Matched (SEQUEST MASCOT) | emPAI | Strategy.Hits | PepMatched(SEQUEST MASCOT) | SpectraMatched(SEQUEST MASCOT) |   |   |  |
| 358.  | IPI00357893                                 | Y N                      | 0.5   | 1             | 3                          | 0                              | 9 | 0 |  |
| *Des: | 3-hydroxyisobutyryl-Coenzyme A hydrolase    |                          |       |               |                            |                                |   |   |  |
|       | SEQUEST:(PepMatched Observed.Hits Coverage) |                          |       | 3             | 1                          | 13.24%                         |   |   |  |
|       | Seq                                         | Charge                   | Xcor  | Delta         | Proability                 | PepHits                        |   |   |  |
|       | AGIATHFVDSEK                                | +2                       |       | 3.507         | 0.368                      | 0.9990                         | 6 |   |  |
|       | SPSAEDVAGVLESYHAK                           | +2                       |       | 4.446         | 0.463                      | 1.0000                         | 2 |   |  |
|       | DPDTFLIIK                                   | +2                       |       | 3.723         | 0.406                      | 0.9997                         | 4 |   |  |
|       | MASCOT:(PepMatched Observed.Hits Coverage)  |                          |       |               |                            |                                |   |   |  |

|      |             |                          |       |               |                            |                                |   |   |  |
|------|-------------|--------------------------|-------|---------------|----------------------------|--------------------------------|---|---|--|
| No.  | Protein     | Matched (SEQUEST MASCOT) | emPAI | Strategy.Hits | PepMatched(SEQUEST MASCOT) | SpectraMatched(SEQUEST MASCOT) |   |   |  |
| 359. | IPI00364249 | Y Y                      | 0.11  | 1             | 2                          | 2                              | 2 | 2 |  |

Identified Human Platelet Proteins

\*Des: PREDICTED: similar to mKIAA1458 protein  
 SEQUEST:(PepMatched Observed.Hits Coverage) 2 1 5.33%  
 Seq Charge Xcor Delta Proability PepHits  
 AGVSTPSSGAASPR +2 3.427 0.466 0.9995 2  
 SGAVQSAGLLGPGSPAR +2 4.338 0.540 1.0000 1  
 MASCOT:(PepMatched Observed.Hits Coverage) 2 1 5.33%  
 Seq Charge ObservedMS ExpectedMS CalculatedMS Pepscore PepHits  
 AGVSTPSSGAASPR +2 622.8181 1243.6217 1243.6156 0.01 66 1  
 SGAVQSAGLLGPGSPAR +2 762.9166 1523.8186 1523.8055 0.01 61 1

No. Protein Matched (SEQUEST MASCOT) emPAI Strategy.Hits PepMatched(SEQUEST MASCOT) SpectraMatched(SEQUEST MASCOT)  
 360. IPI00566940 N Y 0.15 2 0 4 0 26

\*Des: 68 kDa protein  
 SEQUEST:(PepMatched Observed.Hits Coverage)  
 MASCOT:(PepMatched Observed.Hits Coverage) 4 3 8.51%  
 Seq Charge ObservedMS ExpectedMS CalculatedMS Pepscore PepHits  
 APDFVIFYAPR +2 591.8043 1181.5941 1181.5869 0.01 52 16  
 SEEERTTEAEKNER +3 569.9315 1706.7727 1706.7707 0 51 8  
 ILALCMGNHELYMR +2 832.4280 1662.8415 1662.8044 0.04 42 12  
 ISQLEMAR +2 474.2526 946.4906 946.4906 0 62 8

No. Protein Matched (SEQUEST MASCOT) emPAI Strategy.Hits PepMatched(SEQUEST MASCOT) SpectraMatched(SEQUEST MASCOT)  
 361. IPI00213536 Y Y 0.81 3 5 6 23 24

\*Des: PREDICTED: calpain, small subunit 1  
 SEQUEST:(PepMatched Observed.Hits Coverage) 5 2 29.91%  
 Seq Charge Xcor Delta Proability PepHits  
 ILGGVISAISEAAAQYNPEPPPPR +3 6.324 0.651 1.0000 10  
 SGTIGSNELPGAFEAAAGFHLNQHIYSMIIR +4 3.554 0.506 1.0000 3  
 KLFVQLAGDDMEVSATELMNILNK +3 4.019 0.358 0.9994 2  
 SMVAVMDSDTTGK +2 4.921 0.599 1.0000 9  
 SHYSNIEANESSEER +3 5.682 0.437 1.0000 5  
 MASCOT:(PepMatched Observed.Hits Coverage) 6 3 23.71%  
 Seq Charge ObservedMS ExpectedMS CalculatedMS Pepscore PepHits  
 SHYSNIEANESSEER +2 897.39 1792.77 1792.75 0.02 94 5  
 SMVAVMDSDTTGK +2 671.31 1340.60 1340.60 0 113 9  
 LGFEFEK +2 435.23 868.44 868.43 0.01 53 9  
 ILGGVISAISEAAAQYNPEPPPPR +3 816.44 2446.30 2446.29 0.01 101 7  
 LFFVQLAGDDMEVSATELMNILNK +3 851.10 2550.29 2550.27 0.02 110 2  
 KLFVQLAGDDMEVSATELMNILNK +3 893.81 2678.40 2678.37 0.03 56 2

No. Protein Matched (SEQUEST MASCOT) emPAI Strategy.Hits PepMatched(SEQUEST MASCOT) SpectraMatched(SEQUEST MASCOT)  
 362. IPI00213463 Y N 0.16 2 11 0 16 0

\*Des: Alpha-actinin 4  
 SEQUEST:(PepMatched Observed.Hits Coverage) 11 2 22.33%  
 Seq Charge Xcor Delta Proability PepHits  
 MAPYQGPDAAPGALDYK +2 4.096 0.487 0.9999 1  
 VLAVNQENEHLMEDYER +2 5.636 0.582 1.0000 3

Identified Human Platelet Proteins

|                             |       |       |        |        |   |
|-----------------------------|-------|-------|--------|--------|---|
| LSGSNPYTSVTPQIINSK          | +2    | 4.880 | 0.493  | 1.0000 | 2 |
| LVSIGAEIIVDGNK +2           | 4.143 | 0.518 | 0.9999 | 1      |   |
| QLETIDQLHLEYAK +2           | 3.738 | 0.492 | 0.9999 | 2      |   |
| KDDPVTNLNNAFEVAEK           | +2    | 4.811 | 0.582  | 1.0000 | 2 |
| AGTQIENIDEDFRDGLK           | +2    | 4.309 | 0.478  | 0.9976 | 2 |
| NVNVQNFHISWK +2             | 3.190 | 0.509 | 0.9998 | 1      |   |
| QFASQANMVGWPWIQTK           | +2    | 3.680 | 0.509  | 0.9999 | 2 |
| VEQIAAIAQELNELDYYDSHNVNTR   | +3    | 4.930 | 0.384  | 0.9998 | 3 |
| SIVDYKPNLDLLEQQHQIQEALIFDNK | +3    | 5.152 | 0.645  | 1.0000 | 2 |

MASCOT:(PepMatched Observed.Hits Coverage)

No. 363. Protein IPI00205519 Matched (SEQUEST MASCOT) Y Y emPAI 0.17 Strategy.Hits 2 PepMatched(SEQUEST MASCOT) 7 SpectraMatched(SEQUEST MASCOT) 9 10 13

\*Des: UDP-glucose glycoprotein:glucosyltransferase

|                                             |       |       |          |
|---------------------------------------------|-------|-------|----------|
| SEQUEST:(PepMatched Observed.Hits Coverage) | 7     | 1     | 7.21%    |
| Seq Charge Xcor Delta Probility PepHits     |       |       |          |
| ILETTTFFQR +2                               | 2.787 | 0.384 | 0.9974 2 |
| VWQLQDLSFQTAAR +2                           | 5.019 | 0.553 | 1.0000 1 |
| FLFVDADQIVR +2                              | 3.748 | 0.538 | 0.9999 2 |
| SYDAILEAAFR +2                              | 3.588 | 0.467 | 0.9998 2 |
| ILAAPVELALVVMK +2                           | 3.593 | 0.621 | 1.0000 2 |
| IIGPLEDSELFNQDDFHLLNIILK +3                 | 4.215 | 0.497 | 1.0000 1 |
| WFSAPLLELEASEFLAEDSQEK +3                   | 5.435 | 0.587 | 1.0000 1 |

MASCOT:(PepMatched Observed.Hits Coverage)

|                                                                |        |         |         |         |      |      |
|----------------------------------------------------------------|--------|---------|---------|---------|------|------|
| Seq Charge ObservedMS ExpectedMS CalculatedMS Pepscore PepHits |        |         |         |         |      |      |
| SGYWASHLAGR +2                                                 | 603.35 | 1204.68 | 1203.58 | 1.1     | 68   | 1    |
| QLQTLFQEEK +2                                                  | 632.34 | 1262.66 | 1262.65 | 0.01    | 42   | 1    |
| ILETTTFFQR +2                                                  | 628.34 | 1254.66 | 1254.66 | 0       | 43   | 2    |
| FLFVDADQIVR +2                                                 | 661.86 | 1321.71 | 1321.70 | 0.01    | 58   | 2    |
| VWQLQDLSFQTAAR +2                                              | 709.85 | 831.94  | 1661.86 | 1661.85 | 0.01 | 57 1 |
| SYDAILEAAFR +2                                                 | 709.85 | 1417.69 | 1417.69 | 0       | 48   | 2    |
| ILAAPVELALVVMK +2                                              | 733.96 | 1465.90 | 1465.89 | 0.01    | 70   | 2    |
| WFSAPLLELEASEFLAEDSQEK +3                                      | 804.07 | 2409.19 | 2409.17 | 0.02    | 53   | 1    |
| IIGPLEDSELFNQDDFHLLNIILK +3                                    | 975.85 | 2924.53 | 2924.52 | 0.01    | 67   | 1    |

No. 364. Protein IPI00212666 Matched (SEQUEST MASCOT) Y Y emPAI 0.13 Strategy.Hits 1 PepMatched(SEQUEST MASCOT) 7 SpectraMatched(SEQUEST MASCOT) 13 8 91

\*Des: Rat alpha(1)-inhibitor 3, variant I precursor

|                                             |       |       |          |
|---------------------------------------------|-------|-------|----------|
| SEQUEST:(PepMatched Observed.Hits Coverage) | 7     | 1     | 7.67%    |
| Seq Charge Xcor Delta Probility PepHits     |       |       |          |
| ESVVFVQTDKPVYKPGQSVK +3                     | 4.536 | 0.394 | 0.9999 2 |
| SSGSLFNAMK +2                               | 2.713 | 0.313 | 0.9851 1 |
| TPLVTIQSSGSFSQK+2                           | 4.592 | 0.574 | 1.0000 1 |
| GGEFEMMPLGVNK +2                            | 3.998 | 0.413 | 0.9997 1 |
| FSIDTSSISGYSLNK +2                          | 3.499 | 0.527 | 0.9998 1 |
| DMGLTAFTNLK +2                              | 3.504 | 0.482 | 0.9998 1 |
| MLIYTILPDGEVIADSVTFQVEK +3                  | 5.147 | 0.474 | 1.0000 1 |

Identified Human Platelet Proteins

| MASCOT:(PepMatched Observed.Hits Coverage) | 13     | 3          | 16.07%     |              |      |     |    |          |         |
|--------------------------------------------|--------|------------|------------|--------------|------|-----|----|----------|---------|
| Seq                                        | Charge | ObservedMS | ExpectedMS | CalculatedMS |      |     |    | Pepscore | PepHits |
| TPLVTIQSSGSFSQK+2                          |        | 790.43     | 1578.84    | 1578.83      | 0.01 | 57  | 1  |          |         |
| VHLSFSPSQSLPASQTHMR                        | +3     | 704.03     | 2109.06    | 2109.04      | 0.02 | 43  | 2  |          |         |
| LPSSEEEESLDINIEGAK                         | +2     | 980.48     | 1958.95    | 1958.93      | 0.02 | 117 | 6  |          |         |
| FSIDTSSISGYSLNK+2                          |        | 866.45     | 1730.89    | 1730.87      | 0.02 | 88  | 3  |          |         |
| YMLVPSQLYTETPEK                            | +2     | 949.49     | 1896.97    | 1896.95      | 0.02 | 85  | 8  |          |         |
| SEGYLYTPQASSAEVEMSAYVVLAR                  | +3     | 907.78     | 2720.31    | 2720.30      | 0.01 | 50  | 6  |          |         |
| MLSGFIPLKPTVK                              | +2     | 715.93     | 1429.85    | 1429.84      | 0.01 | 48  | 5  |          |         |
| AHFSVMGDILSSAIK+2                          |        | 788.42     | 1574.83    | 1574.81      | 0.02 | 77  | 15 |          |         |
| EEHSFTVMEFVLPR+3                           |        | 574.29     | 1719.84    | 1719.83      | 0.01 | 66  | 35 |          |         |
| QLSFSLSAEPIQGPK                            | +2     | 882.97     | 1763.92    | 1763.91      | 0.01 | 84  | 15 |          |         |
| AFIFIDESHITDAFTWLSK                        | +3     | 747.72     | 2240.13    | 2240.12      | 0.01 | 57  | 6  |          |         |
| DGSYSAFGDHNGQGQNTWLTAFVLK                  | +3     | 924.11     | 2769.30    | 2769.28      | 0.02 | 73  | 4  |          |         |
| NLHPLNELFPLAYIEDPK                         | +3     | 708.38     | 2122.12    | 2122.11      | 0.01 | 50  | 27 |          |         |

No. 365. Protein IPI00326140 Matched (SEQUEST MASCOT) Y Y emPAI Strategy.Hits 0.22 2 PepMatched(SEQUEST MASCOT) 26 SpectraMatched(SEQUEST MASCOT) 21 57 46  
 \*Des: Alpha-1-macroglobulin

| SEQUEST:(PepMatched Observed.Hits Coverage) | 26     | 6     | 28.39% |            |         |  |  |  |  |
|---------------------------------------------|--------|-------|--------|------------|---------|--|--|--|--|
| Seq                                         | Charge | Xcor  | Delta  | Proability | PepHits |  |  |  |  |
| AEDITHNGIVYTPK                              | +3     | 3.699 | 0.481  | 0.9998     | 6       |  |  |  |  |
| QLNYQHSDGSYSTFGDR                           | +3     | 3.997 | 0.546  | 1.0000     | 4       |  |  |  |  |
| DAVNEEESVHWQR                               | +2     | 3.542 | 0.384  | 0.9928     | 1       |  |  |  |  |
| VAEVPALVQK                                  | +2     | 2.826 | 0.458  | 0.9992     | 6       |  |  |  |  |
| AESPVFVQTDKPIYKPGQTVK                       | +2     | 5.144 | 0.558  | 1.0000     | 4       |  |  |  |  |
| DTVVKPVIVEPEGIEK                            | +2     | 3.711 | 0.468  | 0.9997     | 2       |  |  |  |  |
| AFAQAQSYIYIEK                               | +2     | 3.780 | 0.478  | 0.9998     | 1       |  |  |  |  |
| AISYLISGYQR                                 | +2     | 3.197 | 0.388  | 0.9988     | 2       |  |  |  |  |
| GSIFNSGSHVLPLEQ GK                          | +2     | 3.499 | 0.526  | 0.9998     | 2       |  |  |  |  |
| IHLLNEDALK                                  | +2     | 2.817 | 0.468  | 0.9992     | 2       |  |  |  |  |
| TSSMMMMGASEVAQEVEVR                         | +2     | 4.731 | 0.617  | 1.0000     | 2       |  |  |  |  |
| LSPQSIYNLLPQK                               | +3     | 3.831 | 0.370  | 0.9999     | 1       |  |  |  |  |
| PLSPSALIAVEIK                               | +3     | 3.562 | 0.440  | 0.9998     | 3       |  |  |  |  |
| YVVLVPELYAGVPEK                             | +2     | 3.126 | 0.406  | 0.9979     | 1       |  |  |  |  |
| THITNAFNWLSMK                               | +2     | 3.737 | 0.646  | 1.0000     | 2       |  |  |  |  |
| QDLNDNDAYSVFQSIGLK                          | +2     | 5.664 | 0.597  | 1.0000     | 4       |  |  |  |  |
| HSQGNTWLTAFVLK+2                            |        | 5.332 | 0.565  | 1.0000     | 2       |  |  |  |  |
| LIVYTILPNEELIADVQK                          | +3     | 5.143 | 0.599  | 1.0000     | 3       |  |  |  |  |
| ALLAYAFALAGNR                               | +2     | 2.950 | 0.361  | 0.9956     | 2       |  |  |  |  |
| ANTFYRPGLPFFGQVLLVDEK                       | +3     | 5.809 | 0.557  | 1.0000     | 3       |  |  |  |  |
| IFQWQNVDLPGGLHQLSFPLSVEPALGIYK              | +3     | 6.449 | 0.640  | 1.0000     | 2       |  |  |  |  |
| KYFPETWIWDMVPLDLSGDGELPK                    | +3     | 4.024 | 0.342  | 0.9995     | 1       |  |  |  |  |
| VFQPFLELTLPSVVR                             | +2     | 4.437 | 0.574  | 1.0000     | 3       |  |  |  |  |
| APSAEVEMTAYVLLAYLTSASSR                     | +3     | 3.988 | 0.566  | 1.0000     | 1       |  |  |  |  |
| DAVNEEESVHWQRPK                             | +2     | 3.645 | 0.473  | 0.9997     | 3       |  |  |  |  |
| RSEVLESLNK                                  | +2     | 3.065 | 0.167  | 0.9614     | 2       |  |  |  |  |



Identified Human Platelet Proteins

| MASCOT:(PepMatched Observed.Hits Coverage) | 21     | 4          | 21.11%     |              |       |     |    |          |         |
|--------------------------------------------|--------|------------|------------|--------------|-------|-----|----|----------|---------|
| Seq                                        | Charge | ObservedMS | ExpectedMS | CalculatedMS |       |     |    | PepScore | PepHits |
| VAEVPALVQK                                 | +2     | 527.28     | 1052.54    | 1052.62      | -0.07 | 51  | 5  |          |         |
| RSEVLESLNK                                 | +2     | 587.82     | 1173.63    | 1173.64      | 0     | 50  | 3  |          |         |
| AEDITHNGIVYTPK                             | +2     | 779.40     | 1556.79    | 1556.78      | 0.01  | 58  | 7  |          |         |
| DAVNEEESVHWQRPK                            | +2     | 912.44     | 1822.87    | 1822.86      | 0.01  | 67  | 67 | 2        |         |
| QLNYQHSDGYSYTFGDR                          | +2     | 987.94     | 1973.86    | 1973.85      | 0.01  | 68  | 68 | 4        |         |
| TVSWAVTPK                                  | +2     | 494.78     | 987.55     | 987.54       | 0.01  | 66  | 1  |          |         |
| AISYLISGYQR                                | +2     | 635.84     | 1269.67    | 1269.67      | 0     | 76  | 4  |          |         |
| AFAQAQSYIYIEK                              | +2     | 766.40     | 1530.78    | 1530.77      | 0.01  | 71  | 1  |          |         |
| DTVVKPVIVEPEGIEK                           | +2     | 876.50     | 1750.98    | 1750.97      | 0.01  | 76  | 76 | 3        |         |
| GSIFNSGSHVLPLEQGK                          | +2     | 885.46     | 1768.92    | 1768.91      | 0.01  | 72  | 72 | 2        |         |
| IHFLLNEDALK                                | +2     | 656.87     | 1311.73    | 1311.72      | 0.01  | 52  | 2  |          |         |
| ALLAYAFALAGNR                              | +2     | 675.88     | 1349.75    | 1349.75      | 0     | 84  | 1  |          |         |
| LSPQSIYNLLPQK                              | +3     | 500.95     | 1499.84    | 1499.83      | 0.01  | 49  | 2  |          |         |
| THITNAFNWLSMK                              | +2     | 781.90     | 1561.78    | 1561.77      | 0.01  | 80  | 1  |          |         |
| HSQGNTWLTAFVLK+2                           |        | 801.43     | 1600.85    | 1600.84      | 0.01  | 100 | 4  |          |         |
| QDLNDNDAYSVFQSIGLK                         | +3     | 676.66     | 2026.97    | 2025.96      | 1.01  | 59  | 59 | 3        |         |
| LIVYTILPNEELIADVQK                         | +3     | 691.07     | 2070.18    | 2070.16      | 0.02  | 69  | 69 | 2        |         |
| TSSMMMMGASEVAQEVEVR                        | +3     | 691.64     | 2071.91    | 2071.90      | 0.01  | 44  | 44 | 1        |         |
| ANTFYRPGLPFFGQVLLVDEK                      | +3     | 804.43     | 2410.27    | 2410.27      | 0     | 70  | 70 | 3        |         |
| AEQGAYLGPLPYK                              | +2     | 703.87     | 1405.72    | 1405.72      | 0     | 48  | 2  |          |         |
| YVVLVPSELYAGVPEK                           | +2     | 881.99     | 1761.96    | 1761.96      | 0     | 53  | 53 | 3        |         |

No. 366. Protein IPI00200504 Matched (SEQUEST MASCOT) Y Y emPAI Strategy.Hits 0.06 1 4 3 4 8 PepMatched(SEQUEST MASCOT) SpectraMatched(SEQUEST MASCOT)

\*Des: Kalirin-12a

| SEQUEST:(PepMatched Observed.Hits Coverage) | 4      | 1          | 2.32%      |              |         |        |   |          |         |
|---------------------------------------------|--------|------------|------------|--------------|---------|--------|---|----------|---------|
| Seq                                         | Charge | Xcor       | Delta      | Proability   | PepHits |        |   |          |         |
| LQGFEGTLTAQGK                               | +2     | 2.885      | 0.372      | 0.9959       | 1       |        |   |          |         |
| MFVLNELVQTEK                                | +2     | 4.063      | 0.351      | 0.9995       | 1       |        |   |          |         |
| VILQAANSDIQQAQWVQDINQVLETQR                 | +3     |            |            | 4.313        | 0.486   | 1.0000 | 1 |          |         |
| VFLFEQIVIFSELLR                             | +3     | 3.948      | 0.371      | 0.9998       | 1       |        |   |          |         |
| MASCOT:(PepMatched Observed.Hits Coverage)  | 3      | 1          | 1.42%      |              |         |        |   |          |         |
| Seq                                         | Charge | ObservedMS | ExpectedMS | CalculatedMS |         |        |   | PepScore | PepHits |
| LQGFEGTLTAQGK                               | +2     | 675.36     | 1348.70    | 1348.70      | 0       | 55     | 2 |          |         |
| MFVLNELVQTEK                                | +2     | 725.89     | 1449.76    | 1449.75      | 0.01    | 72     | 1 |          |         |
| VFLFEQIVIFSELLR                             | +3     | 618.36     | 1852.06    | 1852.05      | 0.01    | 65     | 5 |          |         |

No. 367. Protein IPI00205378 Matched (SEQUEST MASCOT) Y Y emPAI Strategy.Hits 1.6 3 7 6 12 13 PepMatched(SEQUEST MASCOT) SpectraMatched(SEQUEST MASCOT)

\*Des: PREDICTED: similar to Syntaxin-11

| SEQUEST:(PepMatched Observed.Hits Coverage) | 7      | 2     | 36.64% |            |         |  |  |  |  |
|---------------------------------------------|--------|-------|--------|------------|---------|--|--|--|--|
| Seq                                         | Charge | Xcor  | Delta  | Proability | PepHits |  |  |  |  |
| LAELQELSR                                   | +2     | 3.387 | 0.361  | 0.9993     | 4       |  |  |  |  |
| AFQQAMYEYNQAEMK                             | +2     | 4.795 | 0.503  | 1.0000     | 3       |  |  |  |  |
| QADTLNVIELNVQK                              | +2     | 3.566 | 0.507  | 0.9998     | 1       |  |  |  |  |

Identified Human Platelet Proteins

| Seq                                        | Charge | ObservedMS | ExpectedMS | CalculatedMS | PepScore | PepHits |
|--------------------------------------------|--------|------------|------------|--------------|----------|---------|
| DVSGEQIEDMFEQ GK                           | +2     | 4.382      | 0.517      | 1.0000       | 2        |         |
| VIQDIQDENQLLLIDVR                          | +2     | 4.920      | 0.460      | 1.0000       | 2        |         |
| WDVFSENLLADV K                             | +2     | 2.901      | 0.211      | 0.9570       | 1        |         |
| IRDVHELFLQMAVLVEK                          | +3     | 5.056      | 0.566      | 1.0000       | 3        |         |
| MASCOT:(PepMatched Observed.Hits Coverage) |        | 6          | 3          | 27.05%       |          |         |
| LAELQE LSR                                 | +2     | 529.80     | 1057.58    | 1057.58      | 0        | 65      |
| MKDR LAELQE LSR                            | +3     | 529.80     | 1586.37    | 1587.84      | -1.46    | 45      |
| AFQQAMY EYNQAEMK                           | +2     | 926.41     | 1850.80    | 1850.80      | 0        | 74      |
| QADTLNVI ELNVQK                            | +2     | 792.93     | 1583.85    | 1583.85      | 0        | 62      |
| DVSGEQIEDMFEQ GK                           | +2     | 856.38     | 1710.75    | 1710.74      | 0.01     | 59      |
| IRDVHELFLQMAVLVEK                          | +3     | 680.71     | 2039.12    | 2039.12      | 0        | 72      |

No. 368. Protein IPI00201307 Matched (SEQUEST MASCOT) Y Y emPAI Strategy.Hits 1.15 2 3 PepMatched(SEQUEST MASCOT) 3 8 SpectraMatched(SEQUEST MASCOT) 9

\*Des: PREDICTED: similar to ubiquinol-cytochrome c reductase binding protein

| Seq                                         | Charge | Xcor     | Delta     | Probability | PepHits | PepScore | PepHits |
|---------------------------------------------|--------|----------|-----------|-------------|---------|----------|---------|
| SEQUEST:(PepMatched Observed.Hits Coverage) |        | 3        | 1         | 26.54%      |         |          |         |
| DDTMHETEDVKEAIR                             | +2     | 4.334    | 0.358     | 0.9994      | 4       |          |         |
| YEEDKFYLEPYLK                               | +2     | 4.817    | 0.436     | 1.0000      | 3       |          |         |
| DDTMHETEDVK                                 | +2     | 2.921    | 0.334     | 0.9983      | 2       |          |         |
| MASCOT:(PepMatched Observed.Hits Coverage)  |        | 3        | 2         | 26.54%      |         |          |         |
| DDTMHETEDVK                                 | +2     | 660.2853 | 1318.5560 | 1318.5347   | 0.02    | 56       | 3       |
| YEEDKFYLEPYLK                               | +2     | 868.9398 | 1735.8650 | 1735.8344   | 0.03    | 74       | 3       |
| DDTMHETEDVKEAIR                             | +2     | 894.9232 | 1787.8319 | 1787.7996   | 0.03    | 73       | 4       |

No. 369. Protein IPI00564409 Matched (SEQUEST MASCOT) N Y emPAI Strategy.Hits 0.32 2 0 PepMatched(SEQUEST MASCOT) 3 0 SpectraMatched(SEQUEST MASCOT) 19

\*Des: PREDICTED: similar to Myosin regulatory light chain 2-A, smooth muscle isoform (Myosin RLC-A)

| Seq                                         | Charge | ObservedMS | ExpectedMS | CalculatedMS | PepScore | PepHits |
|---------------------------------------------|--------|------------|------------|--------------|----------|---------|
| SEQUEST:(PepMatched Observed.Hits Coverage) |        | 3          | 2          | 8.45%        |          |         |
| LNGTDPEDVIR                                 | +2     | 615.7902   | 1229.5658  | 1227.6095    | 1.96     | 47      |
| EAFNMIDQNR                                  | +2     | 619.2893   | 1236.5641  | 1236.5557    | 0.01     | 54      |
| GNFN YIEFTR                                 | +2     | 630.8066   | 1259.5987  | 1259.5934    | 0.01     | 46      |

No. 370. Protein IPI00324618 Matched (SEQUEST MASCOT) Y Y emPAI Strategy.Hits 0.29 2 6 PepMatched(SEQUEST MASCOT) 5 6 SpectraMatched(SEQUEST MASCOT) 5

\*Des: General vesicular transport factor p115

| Seq                                         | Charge | Xcor  | Delta | Probability | PepHits | PepScore | PepHits |
|---------------------------------------------|--------|-------|-------|-------------|---------|----------|---------|
| SEQUEST:(PepMatched Observed.Hits Coverage) |        | 6     | 2     | 10.25%      |         |          |         |
| SVPVEGESELVTA AK                            | +2     | 3.797 | 0.523 | 0.9999      | 1       |          |         |
| IVAFENAFER                                  | +2     | 2.715 | 0.343 | 0.9959      | 2       |          |         |
| QLGPPVQQIILVSPMGVSK                         | +2     | 4.088 | 0.453 | 0.9998      | 1       |          |         |
| EQDDL LVLLADQDQK                            | +2     | 3.127 | 0.185 | 0.9533      | 1       |          |         |
| QSEDLGSQFTEIFIK                             | +2     | 3.943 | 0.503 | 0.9999      | 1       |          |         |

| Identified Human Platelet Proteins         |                                                             |                            |            |                 |                              |                                  |     |          |         |  |
|--------------------------------------------|-------------------------------------------------------------|----------------------------|------------|-----------------|------------------------------|----------------------------------|-----|----------|---------|--|
|                                            | QPENVTLLLSLLEEFDFHVR                                        | +3                         | 3.932      | 0.431           | 0.9999                       | 1                                |     |          |         |  |
| MASCOT:(PepMatched Observed.Hits Coverage) | 5                                                           | 2                          | 7.79%      |                 |                              |                                  |     |          |         |  |
|                                            | Seq                                                         | Charge                     | ObservedMS | ExpectedMS      | CalculatedMS                 |                                  |     | PepScore | PepHits |  |
|                                            | SVPVEGESELVTAAK                                             | +2                         | 758.40     | 1514.78         | 1514.78                      | 0                                | 59  | 1        |         |  |
|                                            | IVAFENAFER                                                  | +2                         | 598.31     | 1194.61         | 1194.60                      | 0.01                             | 43  | 2        |         |  |
|                                            | QSEDLGSQFTEIFIK                                             | +2                         | 871.44     | 1740.87         | 1740.86                      | 0.01                             | 73  | 1        |         |  |
|                                            | QLGPPVQQIILVSPMGVSK                                         | +2                         | 996.08     | 1990.14         | 1990.13                      | 0.01                             | 56  | 2        |         |  |
|                                            | NDGVLLLQALTR                                                | +2                         | 656.88     | 1311.75         | 1311.75                      | 0                                | 43  | 1        |         |  |
| No. 371.                                   | Protein IPI00369190                                         | Matched (SEQUEST MASCOT) Y | emPAI 0.28 | Strategy.Hits 2 | PepMatched(SEQUEST MASCOT) 6 | SpectraMatched(SEQUEST MASCOT) 5 | 8   | 6        |         |  |
| *Des:                                      | PREDICTED: similar to RIKEN cDNA 6330406L22                 |                            |            |                 |                              |                                  |     |          |         |  |
|                                            | SEQUEST:(PepMatched Observed.Hits Coverage)                 | 6                          | 3          | 9.31%           |                              |                                  |     |          |         |  |
|                                            | Seq                                                         | Charge                     | Xcor       | Delta           | Probability                  | PepHits                          |     |          |         |  |
|                                            | ELVELSQASPHDISNVLK                                          | +2                         | 5.857      | 0.571           | 1.0000                       | 1                                |     |          |         |  |
|                                            | PTDATVSLSSLVDYPHQAR                                         | +3                         | 4.564      | 0.456           | 0.9999                       | 1                                |     |          |         |  |
|                                            | YDFEPYVSTNAWSPIMR                                           | +2                         | 3.418      | 0.457           | 0.9994                       | 1                                |     |          |         |  |
|                                            | LQLFGQDFSQAAHSTPDGVPFIIK                                    | +3                         | 4.122      | 0.476           | 1.0000                       | 1                                |     |          |         |  |
|                                            | YPLLNTVETLTAAGTLIAK                                         | +2                         | 5.806      | 0.527           | 1.0000                       | 3                                |     |          |         |  |
|                                            | LYDPGQQYASHVR                                               | +2                         | 3.804      | 0.410           | 0.9995                       | 1                                |     |          |         |  |
|                                            | MASCOT:(PepMatched Observed.Hits Coverage)                  | 5                          | 1          | 6.34%           |                              |                                  |     |          |         |  |
|                                            | Seq                                                         | Charge                     | ObservedMS | ExpectedMS      | CalculatedMS                 |                                  |     | PepScore | PepHits |  |
|                                            | LYDPGQQYASHVR                                               | +2                         | 767.38     | 1532.75         | 1532.74                      | 0.01                             | 51  | 1        |         |  |
|                                            | QDGSESEAATLAMVGR                                            | +2                         | 811.38     | 1620.75         | 1620.74                      | 0.01                             | 45  | 1        |         |  |
|                                            | ELVELSQASPHDISNVLK                                          | +2                         | 990.03     | 1978.05         | 1978.04                      | 0.01                             | 114 | 2        |         |  |
|                                            | LCQAFENGKELVELSQASPHDISNVLK                                 | +3                         | 990.03     | 2967.08         | 2968.50                      | -1.41                            | 65  | 1        |         |  |
|                                            | YPLLNTVETLTAAGTLIAK                                         | +2                         | 995.08     | 1988.14         | 1988.12                      | 0.02                             | 175 | 3        |         |  |
| No. 372.                                   | Protein IPI00373140                                         | Matched (SEQUEST MASCOT) Y | emPAI 0.89 | Strategy.Hits 3 | PepMatched(SEQUEST MASCOT) 2 | SpectraMatched(SEQUEST MASCOT) 6 | 2   | 34       |         |  |
| *Des:                                      | PREDICTED: similar to sid23p                                |                            |            |                 |                              |                                  |     |          |         |  |
|                                            | SEQUEST:(PepMatched Observed.Hits Coverage)                 | 2                          | 1          | 11.3%           |                              |                                  |     |          |         |  |
|                                            | Seq                                                         | Charge                     | Xcor       | Delta           | Probability                  | PepHits                          |     |          |         |  |
|                                            | HEYQANGPEDLNR                                               | +2                         | 4.284      | 0.579           | 1.0000                       | 1                                |     |          |         |  |
|                                            | FPGIKHEYQANGPEDLNR                                          | +3                         | 5.737      | 0.524           | 1.0000                       | 1                                |     |          |         |  |
|                                            | MASCOT:(PepMatched Observed.Hits Coverage)                  | 6                          | 6          | 44.64%          |                              |                                  |     |          |         |  |
|                                            | Seq                                                         | Charge                     | ObservedMS | ExpectedMS      | CalculatedMS                 |                                  |     | PepScore | PepHits |  |
|                                            | HEYQANGPEDLNR                                               | +2                         | 771.86     | 1541.70         | 1541.69                      | 0.01                             | 67  | 6        |         |  |
|                                            | KFPGIKHEYQANGPEDLNR                                         | +3                         | 738.38     | 2212.11         | 2212.10                      | 0.01                             | 41  | 4        |         |  |
|                                            | MIYASSKDAIKK                                                | +2                         | 677.87     | 1353.73         | 1353.73                      | 0                                | 54  | 3        |         |  |
|                                            | LGGSLIVAFEGSPV                                              | +2                         | 673.37     | 1344.73         | 1344.73                      | 0                                | 49  | 8        |         |  |
|                                            | TSIAEKLGGSLIVAFEGSPV                                        | +2                         | 988.04     | 1974.07         | 1974.07                      | 0                                | 97  | 20       |         |  |
|                                            | ESRKEELMFFLWAEQAPLK                                         | +3                         | 817.10     | 2448.26         | 2448.25                      | 0.01                             | 43  | 3        |         |  |
| No. 373.                                   | Protein IPI00470317                                         | Matched (SEQUEST MASCOT) Y | emPAI 0.19 | Strategy.Hits 2 | PepMatched(SEQUEST MASCOT) 6 | SpectraMatched(SEQUEST MASCOT) 8 | 12  | 16       |         |  |
| *Des:                                      | PREDICTED: eukaryotic translation elongation factor 1 gamma |                            |            |                 |                              |                                  |     |          |         |  |

Identified Human Platelet Proteins

| SEQUEST:(PepMatched Observed.Hits Coverage) |        | 6          | 3          | 15.34%       |                 |                  |
|---------------------------------------------|--------|------------|------------|--------------|-----------------|------------------|
| Seq                                         | Charge | Xcor       | Delta      | Proability   | PepHits         |                  |
| KLDPGSEETQTLVR                              | +2     |            | 3.828      | 0.433        | 0.9998          | 4                |
| ALIAAQYSGAQIR                               | +2     |            | 2.780      | 0.401        | 0.9976          | 3                |
| VLSAPPHFHFGQTNR                             |        | +2         |            | 3.137        | 0.465           | 0.9994 3         |
| DGWSLWYAEYR                                 | +2     |            | 2.877      | 0.444        | 0.9993          | 2                |
| GQDLAFPLSPDWQVDYESYTW                       |        | +2         |            | 4.844        | 0.550           | 1.0000 4         |
| YSNEDTSLVALPYFWEHFDK                        | +3     |            | 4.740      | 0.367        | 0.9996          | 2                |
| MASCOT:(PepMatched Observed.Hits Coverage)  |        | 8          | 4          | 19.6%        |                 |                  |
| Seq                                         | Charge | ObservedMS | ExpectedMS | CalculatedMS |                 | Pepscore PepHits |
| KLDPGSEETQTLVR                              | +2     | 786.92     | 1571.82    | 1571.82      | 0 74 4          |                  |
| ALIAAQYSGAQIR                               | +2     | 681.38     | 1360.75    | 1360.75      | 0 54 2          |                  |
| VLSAPPHFHFGQTNR                             |        | +2         | 854.44     | 1706.87      | 1706.86 0.01 53 | 1                |
| ILGLLDTHLK                                  | +2     | 561.85     | 1121.68    | 1121.68      | 0 57 1          |                  |
| DGWSLWYAEYR                                 | +2     | 723.33     | 1444.64    | 1444.64      | 0 49 2          |                  |
| EYFSWEGAFQHV GK                             | +2     |            | 842.89     | 1683.76      | 1683.77 0 48    | 2                |
| YSNEDTSLVALPYFWEHFDK                        | +3     |            | 821.05     | 2460.13      | 2460.13 0 45    | 2                |
| NAFASVILFGTNNSSSISGVVFR                     | +3     |            | 858.45     | 2572.32      | 2572.31 0.01 59 | 1                |

No. 374. Protein IPI00364321 Matched (SEQUEST MASCOT) Y Y emPAI 1.57 Strategy.Hits 1 PepMatched(SEQUEST MASCOT) 3 SpectraMatched(SEQUEST MASCOT) 7  
 \*Des: Electron-transfer-flavoprotein, beta polypeptide

| SEQUEST:(PepMatched Observed.Hits Coverage) |        | 3          | 1          | 17.3%        |           |                  |
|---------------------------------------------|--------|------------|------------|--------------|-----------|------------------|
| Seq                                         | Charge | Xcor       | Delta      | Proability   | PepHits   |                  |
| VETTEDLVAK                                  | +2     |            | 3.174      | 0.410        | 0.9997    | 3                |
| AGDLGVDLTSK                                 | +2     |            | 3.309      | 0.379        | 0.9995    | 3                |
| GIHVEVPGAEAENLGPLQVAR                       | +3     |            | 5.177      | 0.415        | 0.9999    | 2                |
| MASCOT:(PepMatched Observed.Hits Coverage)  |        | 7          | 1          | 34.23%       |           |                  |
| Seq                                         | Charge | ObservedMS | ExpectedMS | CalculatedMS |           | Pepscore PepHits |
| VETTEDLVAK                                  | +2     | 552.80     | 1103.58    | 1103.57      | 0.01 68 3 |                  |
| AGDLGVDLTSK                                 | +2     | 538.29     | 1074.56    | 1074.56      | 0 74 4    |                  |
| EIDGGLETIR                                  | +2     | 551.79     | 1101.57    | 1101.57      | 0 76 6    |                  |
| VSVISVEEPPQR                                | +2     | 670.37     | 1338.72    | 1338.71      | 0.01 68 5 |                  |
| LPAVVTADLR                                  | +2     | 527.82     | 1053.62    | 1053.62      | 0 67 3    |                  |
| GIHVEVPGAEAENLGPLQVAR                       | +3     | 719.39     | 2155.15    | 2155.14      | 0.01 51   | 2                |
| VDLLFLGK                                    | +2     | 452.78     | 903.55     | 903.54       | 0.01 50 8 |                  |

No. 375. Protein IPI00607153 Matched (SEQUEST MASCOT) N Y emPAI 0.15 Strategy.Hits 1 PepMatched(SEQUEST MASCOT) 0 SpectraMatched(SEQUEST MASCOT) 2  
 \*Des: Hypothetical protein

| SEQUEST:(PepMatched Observed.Hits Coverage) |        | 2          | 1          | 4.65%        |         |                  |
|---------------------------------------------|--------|------------|------------|--------------|---------|------------------|
| Seq                                         | Charge | ObservedMS | ExpectedMS | CalculatedMS |         | Pepscore PepHits |
| YTATSQVLLSAK                                | +2     | 641.36     | 1280.70    | 1280.70      | 0 82 12 |                  |
| GFSPADIFVQWLQR                              | +2     | 832.43     | 1662.85    | 1662.85      | 0 45 1  |                  |

No. Protein Matched (SEQUEST MASCOT) emPAI Strategy.Hits PepMatched(SEQUEST MASCOT) SpectraMatched(SEQUEST MASCOT)

Identified Human Platelet Proteins

|       |                                                                                |                          |            |               |                            |                                |        |    |    |
|-------|--------------------------------------------------------------------------------|--------------------------|------------|---------------|----------------------------|--------------------------------|--------|----|----|
| 376.  | IPI00373218                                                                    | N                        | Y          | 0.25          | 1                          | 0                              | 2      | 0  | 4  |
| *Des: | 40 kDa peptidyl-prolyl cis-trans isomerase                                     |                          |            |               |                            |                                |        |    |    |
|       | SEQUEST:(PepMatched Observed.Hits Coverage)                                    |                          |            |               |                            |                                |        |    |    |
|       | MASCOT:(PepMatched Observed.Hits Coverage)                                     |                          |            |               |                            |                                |        |    |    |
|       | Seq                                                                            | Charge                   | ObservedMS | ExpectedMS    | CalculatedMS               | Pepscore PepHits               |        |    |    |
|       | MLENVEVNGEKPAK                                                                 | +2                       | 779.41     | 1556.81       | 1556.79                    | 0.02                           | 41     | 2  |    |
|       | VFFDVDIGGER                                                                    | +2                       | 627.31     | 1252.61       | 1252.61                    | 0                              | 48     | 2  |    |
| No.   | Protein                                                                        | Matched (SEQUEST MASCOT) | emPAI      | Strategy.Hits | PepMatched(SEQUEST MASCOT) | SpectraMatched(SEQUEST MASCOT) |        |    |    |
| 377.  | IPI00358845                                                                    | Y                        | Y          | 0.96          | 1                          | 3                              | 4      | 5  | 5  |
| *Des: | PREDICTED: similar to Proline synthetase associated                            |                          |            |               |                            |                                |        |    |    |
|       | SEQUEST:(PepMatched Observed.Hits Coverage)                                    |                          |            |               |                            |                                |        |    |    |
|       | Seq                                                                            | Charge                   | Xcor       | Delta         | Proability                 | PepHits                        |        |    |    |
|       | VMVQINTSGEDSK                                                                  | +2                       |            | 3.463         | 0.546                      | 1.0000                         | 2      |    |    |
|       | HGLLPSETVAVVEHIK                                                               |                          |            | +3            | 4.220                      | 0.524                          | 1.0000 | 2  |    |
|       | TFGENYVQELLEK                                                                  | +2                       |            | 2.999         | 0.487                      | 0.9998                         | 2      |    |    |
|       | MASCOT:(PepMatched Observed.Hits Coverage)                                     |                          |            |               |                            |                                |        |    |    |
|       | Seq                                                                            | Charge                   | ObservedMS | ExpectedMS    | CalculatedMS               | Pepscore PepHits               |        |    |    |
|       | VMVQINTSGEDSK                                                                  | +2                       | 704.35     | 1406.68       | 1406.67                    | 0.01                           | 69     | 2  |    |
|       | VGSTIFGER                                                                      | +2                       | 483.26     | 964.50        | 964.50                     | 0                              | 53     | 1  |    |
|       | HGLLPSETVAVVEHIK                                                               | +3                       |            | 577.00        | 1727.97                    | 1727.96                        | 0.01   | 51 | 3  |
|       | TFGENYVQELLEK                                                                  | +2                       | 785.40     | 1568.78       | 1568.77                    | 0.01                           | 47     | 2  |    |
| No.   | Protein                                                                        | Matched (SEQUEST MASCOT) | emPAI      | Strategy.Hits | PepMatched(SEQUEST MASCOT) | SpectraMatched(SEQUEST MASCOT) |        |    |    |
| 378.  | IPI00195123                                                                    | N                        | Y          | 0.87          | 1                          | 0                              | 3      | 0  | 4  |
| *Des: | ATP synthase oligomycin sensitivity conferral protein, mitochondrial precursor |                          |            |               |                            |                                |        |    |    |
|       | SEQUEST:(PepMatched Observed.Hits Coverage)                                    |                          |            |               |                            |                                |        |    |    |
|       | MASCOT:(PepMatched Observed.Hits Coverage)                                     |                          |            |               |                            |                                |        |    |    |
|       | Seq                                                                            | Charge                   | ObservedMS | ExpectedMS    | CalculatedMS               | Pepscore PepHits               |        |    |    |
|       | TVLNSFLSK                                                                      | +2                       | 504.8226   | 1007.6306     | 1007.5651                  | 0.07                           | 34     | 1  |    |
|       | YATALYSAASK                                                                    | +2                       | 573.3322   | 1144.6498     | 1144.5764                  | 0.07                           | 75     | 2  |    |
|       | VSLAVLNPIYK                                                                    | +2                       | 608.9124   | 1215.8102     | 1215.7227                  | 0.09                           | 44     | 1  |    |
| No.   | Protein                                                                        | Matched (SEQUEST MASCOT) | emPAI      | Strategy.Hits | PepMatched(SEQUEST MASCOT) | SpectraMatched(SEQUEST MASCOT) |        |    |    |
| 379.  | IPI00231253                                                                    | Y                        | Y          | 2.44          | 1                          | 8                              | 7      | 29 | 40 |
| *Des: | 3-hydroxyacyl-CoA dehydrogenase type II                                        |                          |            |               |                            |                                |        |    |    |
|       | SEQUEST:(PepMatched Observed.Hits Coverage)                                    |                          |            |               |                            |                                |        |    |    |
|       | Seq                                                                            | Charge                   | Xcor       | Delta         | Proability                 | PepHits                        |        |    |    |
|       | VINVNLIGTFNVIR                                                                 | +2                       |            | 4.489         | 0.440                      | 1.0000                         | 4      |    |    |
|       | VVTIAPGLFATPLLTTLPDK                                                           | +2                       |            | 4.317         | 0.614                      | 1.0000                         | 4      |    |    |
|       | LVAGVMGQNEPDQGGQR                                                              | +2                       |            | 5.382         | 0.474                      | 1.0000                         | 6      |    |    |
|       | NQVHTLEDFQR                                                                    | +2                       |            | 3.320         | 0.529                      | 1.0000                         | 3      |    |    |
|       | LVGQGATAVLLDVPNSEGETEAK                                                        | +2                       |            | 5.900         | 0.627                      | 1.0000                         | 2      |    |    |
|       | GGIVGMTLPIAR                                                                   | +2                       |            | 3.437         | 0.299                      | 0.9980                         | 4      |    |    |
|       | GLVAVITGGASGLGLSTAK                                                            | +3                       |            | 4.596         | 0.602                      | 1.0000                         | 18     |    |    |
|       | GVIINTASVAAFEGQVGAAYSASK                                                       | +3                       |            | 3.017         | 0.401                      | 0.9985                         | 4      |    |    |
|       | MASCOT:(PepMatched Observed.Hits Coverage)                                     |                          |            |               |                            |                                |        |    |    |
|       |                                                                                |                          |            | 7             |                            | 1                              | 41.5%  |    |    |

Identified Human Platelet Proteins

| Seq                  | Charge | ObservedMS | ExpectedMS | CalculatedMS | Pepscore | PepHits |
|----------------------|--------|------------|------------|--------------|----------|---------|
| LVAGVMGQNEPDQGGQR    | +2     | 878.43     | 1754.85    | 1754.84      | 0.01     | 114     |
| EVQAALTLAK           | +2     | 522.31     | 1042.61    | 1042.60      | 0.01     | 58      |
| NQVHTLEDFQR          | +2     | 693.85     | 1385.68    | 1385.67      | 0.01     | 51      |
| GGIVGMTLPIAR         | +2     | 592.85     | 1183.68    | 1183.67      | 0.01     | 64      |
| GLVAVITGGASGLGLSTAK  | +2     | 836.49     | 1670.97    | 1670.96      | 0.01     | 91      |
| VINVNLIGTFNVIR       | +2     | 786.47     | 1570.93    | 1570.92      | 0.01     | 53      |
| VVTIAPGLFATPLLTTLPDK | +3     | 689.74     | 2066.21    | 2066.20      | 0.01     | 51      |

| No.   | Protein                                                    | Matched (SEQUEST MASCOT) | emPAI      | Strategy.Hits | PepMatched(SEQUEST MASCOT) | SpectraMatched(SEQUEST MASCOT) |
|-------|------------------------------------------------------------|--------------------------|------------|---------------|----------------------------|--------------------------------|
| 380.  | IPI00198467                                                | Y                        | Y          | 0.28          | 1                          | 3                              |
| *Des: | Trifunctional enzyme beta subunit, mitochondrial precursor |                          |            |               |                            |                                |
|       | SEQUEST:(PepMatched Observed.Hits Coverage)                |                          | 3          | 1             | 7.86%                      |                                |
|       | Seq                                                        | Charge                   | Xcor       | Delta         | Probility                  | PepHits                        |
|       | LAAAFVSR                                                   | +2                       | 2.705      | 0.400         | 0.9987                     | 3                              |
|       | DFIYVSQDPK                                                 | +2                       | 2.710      | 0.247         | 0.9798                     | 1                              |
|       | DVVDYIIFGTVIQEVK+2                                         |                          | 3.959      | 0.532         | 0.9999                     | 3                              |
|       | MASCOT:(PepMatched Observed.Hits Coverage)                 |                          | 3          | 1             | 7.66%                      |                                |
|       | Seq                                                        | Charge                   | ObservedMS | ExpectedMS    | CalculatedMS               | Pepscore                       |
|       | LAAAFVSR                                                   | +2                       | 453.27     | 904.52        | 904.51                     | 0.01                           |
|       | AALSGLLYR                                                  | +2                       | 482.29     | 962.56        | 962.55                     | 0.01                           |
|       | DVVDYIIFGTVIQEVK+2                                         |                          | 919.51     | 1837.00       | 1836.99                    | 0.01                           |

| No.   | Protein                                     | Matched (SEQUEST MASCOT) | emPAI      | Strategy.Hits | PepMatched(SEQUEST MASCOT) | SpectraMatched(SEQUEST MASCOT) |
|-------|---------------------------------------------|--------------------------|------------|---------------|----------------------------|--------------------------------|
| 381.  | IPI00370815                                 | Y                        | Y          | 0.21          | 3                          | 3                              |
| *Des: | PREDICTED: similar to mKIAA0002 protein     |                          |            |               |                            |                                |
|       | SEQUEST:(PepMatched Observed.Hits Coverage) |                          | 3          | 3             | 6.09%                      |                                |
|       | Seq                                         | Charge                   | Xcor       | Delta         | Probility                  | PepHits                        |
|       | AVDDGVNTFK                                  | +2                       | 2.986      | 0.373         | 0.9954                     | 2                              |
|       | FAEAFEIPR                                   | +2                       | 2.865      | 0.463         | 0.9985                     | 2                              |
|       | HFSGLEEAVYR                                 | +3                       | 3.215      | 0.391         | 0.9997                     | 4                              |
|       | MASCOT:(PepMatched Observed.Hits Coverage)  |                          | 7          | 3             | 15.77%                     |                                |
|       | Seq                                         | Charge                   | ObservedMS | ExpectedMS    | CalculatedMS               | Pepscore                       |
|       | LATNAAVTVLR                                 | +2                       | 564.84     | 1127.66       | 1127.67                    | 0                              |
|       | DVDEVSSLLR                                  | +2                       | 566.79     | 1131.58       | 1131.58                    | 0                              |
|       | FAEAFEIPR                                   | +2                       | 575.80     | 1149.58       | 1149.58                    | 0                              |
|       | QYGSEEFLLAK                                 | +2                       | 586.29     | 1170.56       | 1170.56                    | 0                              |
|       | HFSGLEEAVYR                                 | +2                       | 654.32     | 1306.63       | 1306.63                    | 0                              |
|       | AIAGTGANVIVTGGK+2                           |                          | 664.88     | 1327.75       | 1327.75                    | 0                              |
|       | LVPGGGATEIELAK                              | +2                       | 677.88     | 1353.75       | 1353.75                    | 0                              |

| No.   | Protein                                                                 | Matched (SEQUEST MASCOT) | emPAI | Strategy.Hits | PepMatched(SEQUEST MASCOT) | SpectraMatched(SEQUEST MASCOT) |
|-------|-------------------------------------------------------------------------|--------------------------|-------|---------------|----------------------------|--------------------------------|
| 382.  | IPI00365056                                                             | Y                        | Y     | 0.04          | 1                          | 2                              |
| *Des: | PREDICTED: similar to Cleavage stimulation factor, 3 pre-RNA, subunit 1 |                          |       |               |                            |                                |
|       | SEQUEST:(PepMatched Observed.Hits Coverage)                             |                          | 2     | 1             | 1.79%                      |                                |
|       | Seq                                                                     | Charge                   | Xcor  | Delta         | Probility                  | PepHits                        |
|       | IGAVTLSPQLGNAVQK                                                        | +2                       | 4.033 | 0.473         | 0.9999                     | 1                              |

Identified Human Platelet Proteins

|       |                                                                           |                          |              |               |                            |                                |          |          |         |
|-------|---------------------------------------------------------------------------|--------------------------|--------------|---------------|----------------------------|--------------------------------|----------|----------|---------|
|       | VASSVAGLLLFVSR +2                                                         | 3.734                    | 0.524        | 0.9999        | 2                          |                                |          |          |         |
|       | MASCOT:(PepMatched Observed.Hits Coverage)                                | 2                        | 1            | 1.79%         |                            |                                |          |          |         |
|       | Seq Charge ObservedMS                                                     |                          | ExpectedMS   | CalculatedMS  |                            |                                |          | PepScore | PepHits |
|       | IGAVTLSPQLGNAVQK                                                          | +2                       | 798.46       | 1594.92       | 1594.90                    | 0.02                           | 84       |          | 1       |
|       | VASSVAGLLLFVSR +2                                                         | 709.92                   | 1417.83      | 1417.83       | 0                          | 66                             | 2        |          |         |
| No.   | Protein                                                                   | Matched (SEQUEST MASCOT) | emPAI        | Strategy.Hits | PepMatched(SEQUEST MASCOT) | SpectraMatched(SEQUEST MASCOT) |          |          |         |
| 383.  | IPI00194324                                                               | Y N                      | 0.45         | 1             | 8                          | 0                              | 17       | 0        |         |
| *Des: | Pyruvate dehydrogenase E1 component beta subunit, mitochondrial precursor |                          |              |               |                            |                                |          |          |         |
|       | SEQUEST:(PepMatched Observed.Hits Coverage)                               | 8                        | 2            | 38.9%         |                            |                                |          |          |         |
|       | Seq Charge Xcor Delta                                                     | Probility                | PepHits      |               |                            |                                |          |          |         |
|       | EAINQGMDEELERDEK                                                          | +2                       | 4.260        | 0.504         | 0.9977                     | 3                              |          |          |         |
|       | ILEDNSIPQVK                                                               | +2                       | 3.186        | 0.264         | 0.9889                     | 1                              |          |          |         |
|       | VTGADVPMPLYAK                                                             | +2                       | 3.101        | 0.447         | 0.9988                     | 3                              |          |          |         |
|       | TIRPMDIEAIEASVMK                                                          | +2                       | 4.118        | 0.576         | 1.0000                     | 3                              |          |          |         |
|       | VLLGEEVAQYDGAYK                                                           | +3                       | 3.901        | 0.400         | 0.9995                     | 3                              |          |          |         |
|       | TYYMSAGLQPVPIVFR                                                          | +2                       | 4.241        | 0.595         | 1.0000                     | 3                              |          |          |         |
|       | IMEGPAFNFLDAPAVR                                                          | +2                       | 3.641        | 0.546         | 0.9998                     | 3                              |          |          |         |
|       | SAIRDDNPVVMLENELMYGVAFELPTEAQS                                            | +3                       | 4.002        | 0.479         | 0.9978                     | 2                              |          |          |         |
|       | MASCOT:(PepMatched Observed.Hits Coverage)                                |                          |              |               |                            |                                |          |          |         |
| No.   | Protein                                                                   | Matched (SEQUEST MASCOT) | emPAI        | Strategy.Hits | PepMatched(SEQUEST MASCOT) | SpectraMatched(SEQUEST MASCOT) |          |          |         |
| 384.  | IPI00361924                                                               | Y Y                      | 0.15         | 1             | 2                          | 2                              | 5        | 8        |         |
| *Des: | Annexin A7                                                                |                          |              |               |                            |                                |          |          |         |
|       | SEQUEST:(PepMatched Observed.Hits Coverage)                               | 2                        | 3            | 4.45%         |                            |                                |          |          |         |
|       | Seq Charge Xcor Delta                                                     | Probility                | PepHits      |               |                            |                                |          |          |         |
|       | SDTSGHFER                                                                 | +2                       | 2.725        | 0.333         | 0.9989                     | 2                              |          |          |         |
|       | AIQGAGTQER                                                                | +2                       | 2.812        | 0.314         | 0.9984                     | 6                              |          |          |         |
|       | MASCOT:(PepMatched Observed.Hits Coverage)                                | 2                        | 1            | 6.15%         |                            |                                |          |          |         |
|       | Seq Charge ObservedMS                                                     | ExpectedMS               | CalculatedMS |               |                            |                                | PepScore | PepHits  |         |
|       | GFGTDEQAIVDVVSNR                                                          | +2                       | 853.9214     | 1705.8283     | 1705.8271                  | 0                              | 105      |          | 4       |
|       | GAGTDDSTLVR                                                               | +2                       | 546.2679     | 1090.5213     | 1090.5254                  | 0                              | 59       | 4        |         |
| No.   | Protein                                                                   | Matched (SEQUEST MASCOT) | emPAI        | Strategy.Hits | PepMatched(SEQUEST MASCOT) | SpectraMatched(SEQUEST MASCOT) |          |          |         |
| 385.  | IPI00212741                                                               | Y Y                      | 0.15         | 2             | 2                          | 2                              | 3        | 3        |         |
| *Des: | Phosphofructokinase, liver, B-type                                        |                          |              |               |                            |                                |          |          |         |
|       | SEQUEST:(PepMatched Observed.Hits Coverage)                               | 2                        | 1            | 3.78%         |                            |                                |          |          |         |
|       | Seq Charge Xcor Delta                                                     | Probility                | PepHits      |               |                            |                                |          |          |         |
|       | AIGVLTSGGDAQGMNAAVR                                                       | +2                       | 5.758        | 0.705         | 1.0000                     | 2                              |          |          |         |
|       | TFVLEVMGR                                                                 | +2                       | 2.712        | 0.383         | 0.9976                     | 2                              |          |          |         |
|       | MASCOT:(PepMatched Observed.Hits Coverage)                                | 2                        | 2            | 3.78%         |                            |                                |          |          |         |
|       | Seq Charge ObservedMS                                                     | ExpectedMS               | CalculatedMS |               |                            |                                | PepScore | PepHits  |         |
|       | AIGVLTSGGDAQGMNAAVR                                                       | +2                       | 894.4647     | 1786.9148     | 1786.8995                  | 0.02                           | 124      |          | 2       |
|       | TFVLEVMGR                                                                 | +2                       | 526.2908     | 1050.5671     | 1050.5531                  | 0.01                           | 45       | 1        |         |
| No.   | Protein                                                                   | Matched (SEQUEST MASCOT) | emPAI        | Strategy.Hits | PepMatched(SEQUEST MASCOT) | SpectraMatched(SEQUEST MASCOT) |          |          |         |
| 386.  | IPI00196794                                                               | N Y                      | 0.3          | 1             | 0                          | 2                              | 0        | 2        |         |

**Identified Human Platelet Proteins**

|              |                                                                  |                                 |                   |                      |                                   |                                       |          |           |                 |                |
|--------------|------------------------------------------------------------------|---------------------------------|-------------------|----------------------|-----------------------------------|---------------------------------------|----------|-----------|-----------------|----------------|
| <b>*Des:</b> | <b>Ras-related protein Rab-14</b>                                |                                 |                   |                      |                                   |                                       |          |           |                 |                |
|              | <b>SEQUEST:(PepMatched Observed.Hits Coverage)</b>               |                                 |                   |                      |                                   |                                       |          |           |                 |                |
|              | <b>MASCOT:(PepMatched Observed.Hits Coverage)</b> 2 1 13.69%     |                                 |                   |                      |                                   |                                       |          |           |                 |                |
|              | <b>Seq</b>                                                       | <b>Charge</b>                   | <b>ObservedMS</b> | <b>ExpectedMS</b>    | <b>CalculatedMS</b>               |                                       |          |           | <b>PepScore</b> | <b>PepHits</b> |
|              | TGENVEDAFLEAAK                                                   | +2                              | 747.4178          | 1492.8210            | 1492.7045                         | 0.12                                  | 44       | 1         |                 |                |
|              | STYNHLSSWLT DAR                                                  | +3                              | 550.9732          | 1649.8978            | 1649.7798                         | 0.12                                  | 36       | 1         |                 |                |
| <b>No.</b>   | <b>Protein</b>                                                   | <b>Matched (SEQUEST MASCOT)</b> | <b>emPAI</b>      | <b>Strategy.Hits</b> | <b>PepMatched(SEQUEST MASCOT)</b> | <b>SpectraMatched(SEQUEST MASCOT)</b> |          |           |                 |                |
| <b>387.</b>  | <b>IPI00558930</b>                                               | <b>N Y</b>                      | <b>0.24</b>       | <b>1</b>             | <b>0</b>                          | <b>2</b>                              | <b>0</b> | <b>7</b>  |                 |                |
| <b>*Des:</b> | <b>Regulator of G-protein signaling 19 interacting protein 1</b> |                                 |                   |                      |                                   |                                       |          |           |                 |                |
|              | <b>SEQUEST:(PepMatched Observed.Hits Coverage)</b>               |                                 |                   |                      |                                   |                                       |          |           |                 |                |
|              | <b>MASCOT:(PepMatched Observed.Hits Coverage)</b> 2 1 9.14%      |                                 |                   |                      |                                   |                                       |          |           |                 |                |
|              | <b>Seq</b>                                                       | <b>Charge</b>                   | <b>ObservedMS</b> | <b>ExpectedMS</b>    | <b>CalculatedMS</b>               |                                       |          |           | <b>PepScore</b> | <b>PepHits</b> |
|              | APPLVENEEAEPSR                                                   | +2                              | 769.38            | 1536.75              | 1536.74                           | 0.01                                  | 50       | 6         |                 |                |
|              | GPATVEDLPSAFE EK                                                 | +2                              | 795.40            | 1588.78              | 1588.76                           | 0.02                                  | 85       | 1         |                 |                |
| <b>No.</b>   | <b>Protein</b>                                                   | <b>Matched (SEQUEST MASCOT)</b> | <b>emPAI</b>      | <b>Strategy.Hits</b> | <b>PepMatched(SEQUEST MASCOT)</b> | <b>SpectraMatched(SEQUEST MASCOT)</b> |          |           |                 |                |
| <b>388.</b>  | <b>IPI00213618</b>                                               | <b>N Y</b>                      | <b>0.02</b>       | <b>1</b>             | <b>0</b>                          | <b>2</b>                              | <b>0</b> | <b>3</b>  |                 |                |
| <b>*Des:</b> | <b>Sarcoplasmic/endoplasmic reticulum calcium ATPase 1</b>       |                                 |                   |                      |                                   |                                       |          |           |                 |                |
|              | <b>SEQUEST:(PepMatched Observed.Hits Coverage)</b>               |                                 |                   |                      |                                   |                                       |          |           |                 |                |
|              | <b>MASCOT:(PepMatched Observed.Hits Coverage)</b> 2 1 2.57%      |                                 |                   |                      |                                   |                                       |          |           |                 |                |
|              | <b>Seq</b>                                                       | <b>Charge</b>                   | <b>ObservedMS</b> | <b>ExpectedMS</b>    | <b>CalculatedMS</b>               |                                       |          |           | <b>PepScore</b> | <b>PepHits</b> |
|              | VDQSILTGESVSVIK                                                  | +2                              | 787.9436          | 1573.8727            | 1573.8562                         | 0.02                                  | 60       | 2         |                 |                |
|              | GAPEGVIDR                                                        | +2                              | 457.2468          | 912.4791             | 912.4664                          | 0.01                                  | 42       | 1         |                 |                |
| <b>No.</b>   | <b>Protein</b>                                                   | <b>Matched (SEQUEST MASCOT)</b> | <b>emPAI</b>      | <b>Strategy.Hits</b> | <b>PepMatched(SEQUEST MASCOT)</b> | <b>SpectraMatched(SEQUEST MASCOT)</b> |          |           |                 |                |
| <b>389.</b>  | <b>IPI00565213</b>                                               | <b>N Y</b>                      | <b>0.5</b>        | <b>1</b>             | <b>0</b>                          | <b>10</b>                             | <b>0</b> | <b>32</b> |                 |                |
| <b>*Des:</b> | <b>101 kDa protein</b>                                           |                                 |                   |                      |                                   |                                       |          |           |                 |                |
|              | <b>SEQUEST:(PepMatched Observed.Hits Coverage)</b>               |                                 |                   |                      |                                   |                                       |          |           |                 |                |
|              | <b>MASCOT:(PepMatched Observed.Hits Coverage)</b> 10 1 17.71%    |                                 |                   |                      |                                   |                                       |          |           |                 |                |
|              | <b>Seq</b>                                                       | <b>Charge</b>                   | <b>ObservedMS</b> | <b>ExpectedMS</b>    | <b>CalculatedMS</b>               |                                       |          |           | <b>PepScore</b> | <b>PepHits</b> |
|              | LTQYDIVIK                                                        | +2                              | 546.82            | 1091.63              | 1091.62                           | 0.01                                  | 44       | 6         |                 |                |
|              | EVAFDVEIPK                                                       | +2                              | 573.81            | 1145.61              | 1145.60                           | 0.01                                  | 44       | 4         |                 |                |
|              | NMEQFTIHITVGAQSK                                                 | +2                              | 902.47            | 1802.92              | 1802.90                           | 0.02                                  | 84       | 8         |                 |                |
|              | GSLVPASHANLQAAQDFVR                                              | +2                              | 991.02            | 1980.03              | 1980.02                           | 0.01                                  | 100      | 6         |                 |                |
|              | ATFQLTYEEVLK                                                     | +2                              | 721.39            | 1440.76              | 1440.75                           | 0.01                                  | 47       | 2         |                 |                |
|              | FSLAGATNLNGGLLR                                                  | +2                              | 752.92            | 1503.82              | 1502.82                           | 1                                     | 62       | 4         |                 |                |
|              | NLVFVIDISGSMEGQK                                                 | +2                              | 868.95            | 1735.89              | 1735.88                           | 0.01                                  | 79       | 4         |                 |                |
|              | QLVHHFEIDVDIFEPQGISR                                             | +3                              | 793.75            | 2378.22              | 2378.20                           | 0.02                                  | 63       | 4         |                 |                |
|              | LWAYLTIQELLAK                                                    | +2                              | 781.46            | 1560.90              | 1560.89                           | 0.01                                  | 85       | 3         |                 |                |
|              | ILGDMKPVDFDLVLFQSQVQSWK                                          | +3                              | 912.81            | 2735.42              | 2735.40                           | 0.02                                  | 52       | 5         |                 |                |
| <b>No.</b>   | <b>Protein</b>                                                   | <b>Matched (SEQUEST MASCOT)</b> | <b>emPAI</b>      | <b>Strategy.Hits</b> | <b>PepMatched(SEQUEST MASCOT)</b> | <b>SpectraMatched(SEQUEST MASCOT)</b> |          |           |                 |                |
| <b>390.</b>  | <b>IPI00567681</b>                                               | <b>N Y</b>                      | <b>0.23</b>       | <b>1</b>             | <b>0</b>                          | <b>2</b>                              | <b>0</b> | <b>5</b>  |                 |                |
| <b>*Des:</b> | <b>36 kDa protein</b>                                            |                                 |                   |                      |                                   |                                       |          |           |                 |                |
|              | <b>SEQUEST:(PepMatched Observed.Hits Coverage)</b>               |                                 |                   |                      |                                   |                                       |          |           |                 |                |
|              | <b>MASCOT:(PepMatched Observed.Hits Coverage)</b> 2 1 3.89%      |                                 |                   |                      |                                   |                                       |          |           |                 |                |



Identified Human Platelet Proteins

| Seq         | Charge | ObservedMS | ExpectedMS | CalculatedMS | Pepscore | PepHits |
|-------------|--------|------------|------------|--------------|----------|---------|
| LEKPAKYDDLK | +2     | 660.3704   | 1318.7262  | 1318.7132    | 0.01     | 44      |
| LEKPAKYDDLK | +2     | 724.4151   | 1446.8156  | 1446.8082    | 0.01     | 52      |

No. 391. Protein IPI00389806 Matched (SEQUEST MASCOT) Y Y emPAI 0.22 Strategy.Hits 2 PepMatched(SEQUEST MASCOT) 3 SpectraMatched(SEQUEST MASCOT) 11

\*Des: PREDICTED: similar to inter-alpha-inhibitor H2 chain

| SEQUEST:(PepMatched Observed.Hits Coverage) |        |            |            |              |         |      | 3        | 1       | 3.55%  |
|---------------------------------------------|--------|------------|------------|--------------|---------|------|----------|---------|--------|
| Seq                                         | Charge | Xcor       | Delta      | Proability   | PepHits |      |          |         |        |
| IQPSGGTNINEALLR                             | +2     |            | 3.197      | 0.457        | 0.9991  | 2    |          |         |        |
| KFYNQVSTPLLR                                | +2     |            | 3.112      | 0.458        | 0.9993  | 1    |          |         |        |
| AHVSFKPTVAQQR                               | +2     |            | 3.381      | 0.522        | 0.9998  | 5    |          |         |        |
| MASCOT:(PepMatched Observed.Hits Coverage)  |        |            |            |              |         |      | 11       | 3       | 14.69% |
| Seq                                         | Charge | ObservedMS | ExpectedMS | CalculatedMS |         |      | Pepscore | PepHits |        |
| FYNQVSTPLLR                                 | +2     | 669.37     | 1336.73    | 1336.71      | 0.02    | 48   |          | 2       |        |
| VQFELHYQEVK                                 | +2     | 710.37     | 1418.73    | 1418.72      | 0.01    | 85   |          | 2       |        |
| IQPSGGTNINEALLR                             | +2     | 791.94     | 1581.86    | 1581.85      | 0.01    | 102  |          | 4       |        |
| TEDQFSVDFNHNVR                              | +2     |            | 904.44     | 1806.86      | 1805.83 | 1.03 |          | 69      |        |
| HLEVNWVWIIIEPQGMR                           | +2     |            | 910.99     | 1819.96      | 1819.94 | 0.02 |          | 89      |        |
| LVNHSPLPQNVVFDVQIPK                         | +3     |            | 715.41     | 2143.20      | 2143.18 | 0.02 |          | 59      |        |
| FLHVPDTFEGHFQGVPIK                          | +3     |            | 752.07     | 2253.17      | 2253.16 | 0.01 |          | 51      |        |
| TILDDLRTEDQFSVDFNHNVR                       | +3     |            | 878.44     | 2632.31      | 2632.29 | 0.02 |          | 65      |        |
| LWAYLTVNQLLTER                              | +2     | 860.48     | 1718.95    | 1718.94      | 0.01    | 81   |          | 5       |        |
| NILFVIDVSGSMWGIK                            | +2     |            | 889.98     | 1777.95      | 1777.94 | 0.01 |          | 89      |        |
| AGELEVFNGYFVHFFAPENLDPIK                    | +3     |            | 950.82     | 2849.43      | 2849.41 | 0.02 |          | 69      |        |

No. 392. Protein IPI00205389 Matched (SEQUEST MASCOT) Y Y emPAI 1.13 Strategy.Hits 4 PepMatched(SEQUEST MASCOT) 16 SpectraMatched(SEQUEST MASCOT) 14

\*Des: Fibrinogen beta chain precursor

| SEQUEST:(PepMatched Observed.Hits Coverage) |        |      |       |            |         |    | 16 | 16 | 40.65% |
|---------------------------------------------|--------|------|-------|------------|---------|----|----|----|--------|
| Seq                                         | Charge | Xcor | Delta | Proability | PepHits |    |    |    |        |
| GFGNIATNEDTK                                | +2     |      | 3.360 | 0.366      | 0.9984  | 3  |    |    |        |
| TENGGWTVIQNR                                | +2     |      | 3.879 | 0.358      | 0.9992  | 6  |    |    |        |
| LYIDETVNDNIPLNLR                            | +2     |      | 3.888 | 0.443      | 0.9996  | 4  |    |    |        |
| DNENVINEYSSILEDQK                           | +2     |      | 3.868 | 0.404      | 0.9993  | 1  |    |    |        |
| YYWGGLYSWDMSK                               | +2     |      | 4.309 | 0.554      | 1.0000  | 4  |    |    |        |
| IGPTELLIEMEDWK                              | +2     |      | 3.520 | 0.523      | 1.0000  | 3  |    |    |        |
| IGPTELLIEMEDWKGDKVK                         | +3     |      | 3.713 | 0.517      | 1.0000  | 19 |    |    |        |
| GFGNIATNEDTKK                               | +2     |      | 3.260 | 0.422      | 0.9990  | 3  |    |    |        |
| SILEDLRK                                    | +2     |      | 2.705 | 0.301      | 0.9653  | 3  |    |    |        |
| KGFGNIATNEDTKK                              | +3     |      | 3.755 | 0.427      | 1.0000  | 6  |    |    |        |
| AHYGGFTVQTEANKYQVSVNK                       | +2     |      | 6.564 | 0.639      | 1.0000  | 10 |    |    |        |
| KGETSEMYLIQPDTSKPYR                         | +3     |      | 3.678 | 0.493      | 1.0000  | 4  |    |    |        |
| YCGLPGEYWLGNDKISQLTR                        | +2     |      | 4.620 | 0.626      | 1.0000  | 5  |    |    |        |
| ARPAKVDAGQK                                 | +2     |      | 2.736 | 0.422      | 0.9911  | 21 |    |    |        |
| AHYGGFTVQTEANKYQVSVNKYK                     | +3     |      | 4.473 | 0.608      | 1.0000  | 8  |    |    |        |
| QTLNHERPIK                                  | +2     |      | 2.711 | 0.422      | 0.9921  | 4  |    |    |        |

Identified Human Platelet Proteins

| MASCOT:(PepMatched Observed.Hits Coverage) |        | 14         | 12         | 31.82%       |      |    |          |         |  |
|--------------------------------------------|--------|------------|------------|--------------|------|----|----------|---------|--|
| Seq                                        | Charge | ObservedMS | ExpectedMS | CalculatedMS |      |    | PepScore | PepHits |  |
| IGPTELLIEMEDWK                             | +2     | 837.4345   | 1672.8545  | 1672.8382    | 0.02 | 65 | 8        |         |  |
| GFGNIATNEDTK                               | +2     | 633.8066   | 1265.5986  | 1265.5887    | 0.01 | 56 | 7        |         |  |
| TENGGWTVIQNR                               | +2     | 688.3417   | 1374.6688  | 1373.6687    | 1    | 66 | 21       |         |  |
| LYIDETVNDNIPLNLR                           | +2     | 951.5082   | 1901.0019  | 1900.9894    | 0.01 | 72 | 12       |         |  |
| YYWGGGLYSWDMK                              | +2     | 828.3695   | 1654.7245  | 1654.7126    | 0.01 | 67 | 10       |         |  |
| QDGSVDFGR                                  | +2     | 490.7284   | 979.4422   | 979.4359     | 0.01 | 42 | 4        |         |  |
| GFGNIATNEDTKK                              | +2     | 697.8550   | 1393.6954  | 1393.6837    | 0.01 | 52 | 6        |         |  |
| ARPAKVDAGQK                                | +2     | 570.8322   | 1139.6499  | 1139.6411    | 0.01 | 57 | 38       |         |  |
| KGFGNIATNEDTKK                             | +2     | 761.9014   | 1521.7883  | 1521.7787    | 0.01 | 65 | 12       |         |  |
| KGGETSEMYLIQPDTSKPYR                       | +3     | 796.3968   | 2386.1685  | 2386.1474    | 0.02 | 52 | 2        |         |  |
| AHYGGFTVQTEANKYQVSVNK                      | +3     | 781.0657   | 2340.1752  | 2340.1498    | 0.03 | 56 | 5        |         |  |
| AHYGGFTVQTEANKYQVSVNKYK                    | +4     | 658.8386   | 2631.3251  | 2631.3080    | 0.02 | 56 | 7        |         |  |
| ARPAKVDAGQKK                               | +3     | 423.5887   | 1267.7443  | 1267.7360    | 0.01 | 47 | 4        |         |  |
| QTLNHERPIK                                 | +2     | 674.8934   | 1347.7722  | 1347.7623    | 0.01 | 53 | 8        |         |  |

No. 393. Protein IPI00200519 Matched (SEQUEST MASCOT) Y Y emPAI Strategy.Hits 0.17 3 2 3 4 3 PepMatched(SEQUEST MASCOT) SpectraMatched(SEQUEST MASCOT)

\*Des: Putative SKAP55

| SEQUEST:(PepMatched Observed.Hits Coverage) |        | 2          | 3          | 8.24%        |         |    |          |         |  |
|---------------------------------------------|--------|------------|------------|--------------|---------|----|----------|---------|--|
| Seq                                         | Charge | Xcor       | Delta      | Probability  | PepHits |    |          |         |  |
| DHSFLGFQWQK                                 | +2     | 2.794      | 0.419      | 0.9992       | 1       |    |          |         |  |
| YGWWVGEMMQGAIGLVPK                          | +2     | 4.574      | 0.513      | 1.0000       | 3       |    |          |         |  |
| MASCOT:(PepMatched Observed.Hits Coverage)  |        | 3          | 1          | 10.16%       |         |    |          |         |  |
| Seq                                         | Charge | ObservedMS | ExpectedMS | CalculatedMS |         |    | PepScore | PepHits |  |
| IYQFTAASPK                                  | +2     | 563.3057   | 1124.5968  | 1124.5866    | 0.01    | 42 | 1        |         |  |
| AGYLEKR                                     | +2     | 418.7381   | 835.4616   | 835.4552     | 0.01    | 44 | 1        |         |  |
| YGWWVGEMMQGAIGLVPK                          | +2     | 945.9921   | 1889.9696  | 1889.9497    | 0.02    | 47 | 1        |         |  |

No. 394. Protein IPI00421659 Matched (SEQUEST MASCOT) N Y emPAI Strategy.Hits 0.06 1 0 2 0 4 PepMatched(SEQUEST MASCOT) SpectraMatched(SEQUEST MASCOT)

\*Des: Optic atrophy 1-like protein

| SEQUEST:(PepMatched Observed.Hits Coverage) |        | 2          | 1          | 2.45%        |      |    |          |         |  |
|---------------------------------------------|--------|------------|------------|--------------|------|----|----------|---------|--|
| Seq                                         | Charge | ObservedMS | ExpectedMS | CalculatedMS |      |    | PepScore | PepHits |  |
| ALGYFAVVTGK                                 | +2     | 563.32     | 1124.62    | 1124.62      | 0    | 46 | 2        |         |  |
| TSVLEMIAQAR                                 | +2     | 609.83     | 1217.65    | 1217.64      | 0.01 | 51 | 2        |         |  |

No. 395. Protein IPI00331919 Matched (SEQUEST MASCOT) Y N emPAI Strategy.Hits 0.28 1 3 0 3 0 PepMatched(SEQUEST MASCOT) SpectraMatched(SEQUEST MASCOT)

\*Des: Phosphoserine aminotransferase 1

| SEQUEST:(PepMatched Observed.Hits Coverage) |        | 3     | 1     | 10.07%      |         |  |  |  |  |
|---------------------------------------------|--------|-------|-------|-------------|---------|--|--|--|--|
| Seq                                         | Charge | Xcor  | Delta | Probability | PepHits |  |  |  |  |
| IISNTENLVR                                  | +2     | 2.772 | 0.259 | 0.9873      | 1       |  |  |  |  |
| ASLYNAVTTEDVEK                              | +2     | 3.107 | 0.401 | 0.9984      | 1       |  |  |  |  |
| LPYSVLLEIQK                                 | +2     | 2.729 | 0.471 | 0.9992      | 2       |  |  |  |  |

Identified Human Platelet Proteins

MASCOT:(PepMatched Observed.Hits Coverage)

No. 396. Protein IPI00369419 Matched (SEQUEST MASCOT) N Y emPAI 0.3 Strategy.Hits 1 PepMatched(SEQUEST MASCOT) 0 SpectraMatched(SEQUEST MASCOT) 2 0 4

\*Des: PREDICTED: similar to cofilin

SEQUEST:(PepMatched Observed.Hits Coverage)

MASCOT:(PepMatched Observed.Hits Coverage)

| Seq                  | Charge | ObservedMS | ExpectedMS | CalculatedMS | PepScore | PepHits |
|----------------------|--------|------------|------------|--------------|----------|---------|
| YALYDATYETK          | +2     | 669.85     | 1337.68    | 1336.62      | 1.06     | 51      |
| ESKKEDLVFIFWAPESAPLK | +3     | 778.75     | 2333.23    | 2333.23      | 0        | 60      |

No. 397. Protein IPI00365202 Matched (SEQUEST MASCOT) Y Y emPAI 0.38 Strategy.Hits 1 PepMatched(SEQUEST MASCOT) 2 SpectraMatched(SEQUEST MASCOT) 2 3 3

\*Des: PREDICTED: similar to RIKEN cDNA 2700067E09

SEQUEST:(PepMatched Observed.Hits Coverage)

MASCOT:(PepMatched Observed.Hits Coverage)

| Seq                    | Charge | Xcor | Delta | Proability | PepHits |
|------------------------|--------|------|-------|------------|---------|
| AYAEELASHGLNIILISQEEEK | +3     |      | 3.518 | 4.701      | 0.451   |
| VETLVLVADFSR           | +2     |      | 3.518 | 0.448      | 0.9997  |

  

| Seq                    | Charge | ObservedMS | ExpectedMS | CalculatedMS | PepScore | PepHits |
|------------------------|--------|------------|------------|--------------|----------|---------|
| VETLVLVADFSR           | +2     | 674.88     | 1347.74    | 1347.74      | 0        | 46      |
| AYAEELASHGLNIILISQEEEK | +3     | 819.76     | 2456.26    | 2456.24      | 0.02     | 63      |

No. 398. Protein IPI00199272 Matched (SEQUEST MASCOT) Y Y emPAI 0.3 Strategy.Hits 1 PepMatched(SEQUEST MASCOT) 3 SpectraMatched(SEQUEST MASCOT) 2 3 2

\*Des: Tyrosine-protein phosphatase, non-receptor type 1

SEQUEST:(PepMatched Observed.Hits Coverage)

MASCOT:(PepMatched Observed.Hits Coverage)

| Seq                         | Charge | Xcor | Delta | Proability | PepHits |
|-----------------------------|--------|------|-------|------------|---------|
| FIMGDSSVQDQWK               | +2     |      | 3.731 | 0.333      | 0.9989  |
| FSYLAVIEGAK                 | +2     |      | 2.969 | 0.446      | 0.9995  |
| EILHFHYTTWPDFGVPEPASFLNFLFK | +3     |      | 4.277 | 4.277      | 0.283   |

  

| Seq           | Charge | ObservedMS | ExpectedMS | CalculatedMS | PepScore | PepHits |
|---------------|--------|------------|------------|--------------|----------|---------|
| FIMGDSSVQDQWK | +2     | 770.86     | 1539.71    | 1539.70      | 0.01     | 59      |
| FSYLAVIEGAK   | +2     | 599.33     | 1196.65    | 1196.64      | 0.01     | 51      |

No. 399. Protein IPI00373151 Matched (SEQUEST MASCOT) N Y emPAI 0.05 Strategy.Hits 2 PepMatched(SEQUEST MASCOT) 0 SpectraMatched(SEQUEST MASCOT) 4 0 5

\*Des: PREDICTED: similar to hypothetical protein FLJ40243

SEQUEST:(PepMatched Observed.Hits Coverage)

MASCOT:(PepMatched Observed.Hits Coverage)

| Seq                         | Charge | ObservedMS | ExpectedMS | CalculatedMS | PepScore | PepHits |
|-----------------------------|--------|------------|------------|--------------|----------|---------|
| GMGGAMDLYSSSK               | +2     | 620.86     | 1239.71    | 1238.56      | 1.15     | 65      |
| GGHVNLTM LGAMQVSK           | +3     | 548.29     | 1641.83    | 1641.83      | 0        | 55      |
| DLTAVSNAGVDNFGGLLLR         | +3     | 720.39     | 2158.15    | 2158.14      | 0.01     | 62      |
| AAGTTVVEVEEIVDIGSFAPEDIHIPK | +3     | 946.16     | 2835.47    | 2835.45      | 0.02     | 50      |

**Identified Human Platelet Proteins**

|              |                                                            |                                 |                   |                      |                                   |                                       |        |                 |                |  |  |
|--------------|------------------------------------------------------------|---------------------------------|-------------------|----------------------|-----------------------------------|---------------------------------------|--------|-----------------|----------------|--|--|
| <b>No.</b>   | <b>Protein</b>                                             | <b>Matched (SEQUEST MASCOT)</b> | <b>emPAI</b>      | <b>Strategy.Hits</b> | <b>PepMatched(SEQUEST MASCOT)</b> | <b>SpectraMatched(SEQUEST MASCOT)</b> |        |                 |                |  |  |
| 400.         | IPI00231331                                                | Y Y                             | 0.72              | 1                    | 4                                 | 2                                     | 4      | 2               |                |  |  |
| <b>*Des:</b> | Dual specificity mitogen-activated protein kinase kinase 2 |                                 |                   |                      |                                   |                                       |        |                 |                |  |  |
|              | SEQUEST:(PepMatched Observed.Hits Coverage)                |                                 |                   |                      | 4                                 | 1                                     | 18.38% |                 |                |  |  |
|              | <b>Seq</b>                                                 | <b>Charge</b>                   | <b>Xcor</b>       | <b>Delta</b>         | <b>Proability</b>                 | <b>PepHits</b>                        |        |                 |                |  |  |
|              | ISELGAGNGGVVTK                                             | +2                              |                   | 2.848                | 0.452                             | 0.9901                                | 1      |                 |                |  |  |
|              | KLEELDLDEQQR                                               | +2                              |                   | 3.670                | 0.330                             | 0.9989                                | 1      |                 |                |  |  |
|              | PAMAIPELLDYIVNEPPPK                                        | +3                              |                   | 3.905                | 0.524                             | 0.9991                                | 1      |                 |                |  |  |
|              | LQGTHYSVQSDIWSMGLSLVELAIGR                                 | +3                              |                   | 4.223                | 0.387                             | 0.9994                                | 1      |                 |                |  |  |
|              | MASCOT:(PepMatched Observed.Hits Coverage)                 |                                 |                   |                      | 2                                 | 1                                     | 9.8%   |                 |                |  |  |
|              | <b>Seq</b>                                                 | <b>Charge</b>                   | <b>ObservedMS</b> | <b>ExpectedMS</b>    | <b>CalculatedMS</b>               |                                       |        | <b>Pepscore</b> | <b>PepHits</b> |  |  |
|              | KLEELDLDEQQR                                               | +2                              | 758.39            | 1514.76              | 1514.76                           | 0                                     | 63     | 1               |                |  |  |
|              | LQGTHYSVQSDIWSMGLSLVELAIGR                                 | +3                              |                   | 954.17               | 2859.48                           | 2859.46                               | 0.02   | 62              | 1              |  |  |

|              |                                              |                                 |                   |                      |                                   |                                       |       |                 |                |  |  |
|--------------|----------------------------------------------|---------------------------------|-------------------|----------------------|-----------------------------------|---------------------------------------|-------|-----------------|----------------|--|--|
| <b>No.</b>   | <b>Protein</b>                               | <b>Matched (SEQUEST MASCOT)</b> | <b>emPAI</b>      | <b>Strategy.Hits</b> | <b>PepMatched(SEQUEST MASCOT)</b> | <b>SpectraMatched(SEQUEST MASCOT)</b> |       |                 |                |  |  |
| 401.         | IPI00207202                                  | Y Y                             | 0.23              | 1                    | 2                                 | 2                                     | 2     | 4               |                |  |  |
| <b>*Des:</b> | Dynein light intermediate chain 2, cytosolic |                                 |                   |                      |                                   |                                       |       |                 |                |  |  |
|              | SEQUEST:(PepMatched Observed.Hits Coverage)  |                                 |                   |                      | 2                                 | 1                                     | 8.49% |                 |                |  |  |
|              | <b>Seq</b>                                   | <b>Charge</b>                   | <b>Xcor</b>       | <b>Delta</b>         | <b>Proability</b>                 | <b>PepHits</b>                        |       |                 |                |  |  |
|              | NNAASEGVLASFFNSLLSK                          | +2                              |                   | 5.532                | 0.588                             | 1.0000                                | 1     |                 |                |  |  |
|              | ETLVIFVADMSRPWTIMESLQK                       | +3                              |                   | 4.162                | 0.526                             | 0.9999                                | 1     |                 |                |  |  |
|              | MASCOT:(PepMatched Observed.Hits Coverage)   |                                 |                   |                      | 2                                 | 1                                     | 8.49% |                 |                |  |  |
|              | <b>Seq</b>                                   | <b>Charge</b>                   | <b>ObservedMS</b> | <b>ExpectedMS</b>    | <b>CalculatedMS</b>               |                                       |       | <b>Pepscore</b> | <b>PepHits</b> |  |  |
|              | NNAASEGVLASFFNSLLSK                          | +2                              |                   | 985.01               | 1968.01                           | 1968.00                               | 0.01  | 78              | 2              |  |  |
|              | ETLVIFVADMSRPWTIMESLQK                       | +3                              |                   | 865.45               | 2593.33                           | 2593.33                               | 0     | 46              | 2              |  |  |

|              |                                             |                                 |              |                      |                                   |                                       |        |   |  |  |  |  |
|--------------|---------------------------------------------|---------------------------------|--------------|----------------------|-----------------------------------|---------------------------------------|--------|---|--|--|--|--|
| <b>No.</b>   | <b>Protein</b>                              | <b>Matched (SEQUEST MASCOT)</b> | <b>emPAI</b> | <b>Strategy.Hits</b> | <b>PepMatched(SEQUEST MASCOT)</b> | <b>SpectraMatched(SEQUEST MASCOT)</b> |        |   |  |  |  |  |
| 402.         | IPI00194404                                 | Y N                             | 0.43         | 1                    | 3                                 | 0                                     | 6      | 0 |  |  |  |  |
| <b>*Des:</b> | Nucleoside diphosphate kinase A             |                                 |              |                      |                                   |                                       |        |   |  |  |  |  |
|              | SEQUEST:(PepMatched Observed.Hits Coverage) |                                 |              |                      | 3                                 | 1                                     | 34.19% |   |  |  |  |  |
|              | <b>Seq</b>                                  | <b>Charge</b>                   | <b>Xcor</b>  | <b>Delta</b>         | <b>Proability</b>                 | <b>PepHits</b>                        |        |   |  |  |  |  |
|              | VMLGETNPADSKPGTIR                           | +2                              |              | 4.187                | 0.641                             | 0.9986                                | 6      |   |  |  |  |  |
|              | NIHGSDSVESAEK                               | +3                              |              | 2.363                | 0.604                             | 0.9988                                | 2      |   |  |  |  |  |
|              | YMHSGPVMVWEGLNVVK                           | +2                              |              | 4.888                | 0.667                             | 1.0000                                | 3      |   |  |  |  |  |
|              | MASCOT:(PepMatched Observed.Hits Coverage)  |                                 |              |                      |                                   |                                       |        |   |  |  |  |  |

|              |                                              |                                 |                   |                      |                                   |                                       |      |                 |                |  |  |  |
|--------------|----------------------------------------------|---------------------------------|-------------------|----------------------|-----------------------------------|---------------------------------------|------|-----------------|----------------|--|--|--|
| <b>No.</b>   | <b>Protein</b>                               | <b>Matched (SEQUEST MASCOT)</b> | <b>emPAI</b>      | <b>Strategy.Hits</b> | <b>PepMatched(SEQUEST MASCOT)</b> | <b>SpectraMatched(SEQUEST MASCOT)</b> |      |                 |                |  |  |  |
| 403.         | IPI00364262                                  | N Y                             | 0.38              | 1                    | 0                                 | 5                                     | 0    | 6               |                |  |  |  |
| <b>*Des:</b> | PREDICTED: similar to Glycyl-tRNA synthetase |                                 |                   |                      |                                   |                                       |      |                 |                |  |  |  |
|              | SEQUEST:(PepMatched Observed.Hits Coverage)  |                                 |                   |                      |                                   |                                       |      |                 |                |  |  |  |
|              | MASCOT:(PepMatched Observed.Hits Coverage)   |                                 |                   |                      | 5                                 | 1                                     | 8.9% |                 |                |  |  |  |
|              | <b>Seq</b>                                   | <b>Charge</b>                   | <b>ObservedMS</b> | <b>ExpectedMS</b>    | <b>CalculatedMS</b>               |                                       |      | <b>Pepscore</b> | <b>PepHits</b> |  |  |  |
|              | GEFTIETEGK                                   | +2                              | 555.77            | 1109.53              | 1109.52                           | 0.01                                  | 45   | 1               |                |  |  |  |
|              | AEVSELPSVVR                                  | +2                              | 593.33            | 1184.64              | 1184.64                           | 0                                     | 46   | 3               |                |  |  |  |
|              | TVNVVQFEPNK                                  | +2                              | 637.84            | 1273.67              | 1273.67                           | 0                                     | 50   | 1               |                |  |  |  |
|              | LPFAAAQIGNSFR                                | +2                              | 696.38            | 1390.74              | 1390.74                           | 0                                     | 50   | 3               |                |  |  |  |
|              | LGDAVEQGVINNSVLGYFIGR                        | +3                              |                   | 741.06               | 2220.15                           | 2220.15                               | 0    | 43              | 2              |  |  |  |

Identified Human Platelet Proteins

| No.   | Protein                                     | Matched (SEQUEST MASCOT) | emPAI      | Strategy.Hits | PepMatched(SEQUEST MASCOT) | SpectraMatched(SEQUEST MASCOT) |
|-------|---------------------------------------------|--------------------------|------------|---------------|----------------------------|--------------------------------|
| 404.  | IPI00231264                                 | Y Y                      | 0.98       | 1             | 5 7 5                      | 16                             |
| *Des: | Serum paraoxonase/arylesterase 1            |                          |            |               |                            |                                |
|       | SEQUEST:(PepMatched Observed.Hits Coverage) |                          |            | 5             | 1                          | 23.88%                         |
|       | Seq                                         | Charge Xcor              | Delta      | Proability    | PepHits                    |                                |
|       | IFFYDSENPPGSEVLR                            | +2                       | 5.394      | 0.456         | 1.0000                     | 1                              |
|       | YVYIAELLAHK                                 | +2                       | 3.104      | 0.445         | 0.9996                     | 2                              |
|       | VVADGDFDFANGIGISLDGK                        | +2                       | 4.516      | 0.573         | 1.0000                     | 1                              |
|       | LLGLTLVGLVGLVGLVLYK                         | +3                       | 4.545      | 0.563         | 1.0000                     | 3                              |
|       | AKLLGLTLVGLVGLVLYK                          | +3                       | 4.280      | 0.421         | 0.9972                     | 1                              |
|       | MASCOT:(PepMatched Observed.Hits Coverage)  |                          |            | 7             | 1                          | 26.94%                         |
|       | Seq                                         | Charge ObservedMS        | ExpectedMS | CalculatedMS  |                            | Pepscore PepHits               |
|       | IQSILSEDPK                                  | +2 565.31                | 1128.60    | 1128.60       | 0 53                       | 2                              |
|       | YVYIAELLAHK                                 | +2 660.37                | 1318.74    | 1318.73       | 0.01 50                    | 4                              |
|       | IFFYDSENPPGSEVLR                            | +2                       | 935.46     | 1868.91       | 1868.89 0.02               | 91 2                           |
|       | VVADGDFDFANGIGISLDGK                        | +2                       | 947.99     | 1893.96       | 1893.95 0.01               | 59 2                           |
|       | LLGLTLVGLVGLVGLVLYK                         | +2                       | 793.52     | 1585.03       | 1585.02 0.01               | 92 6                           |
|       | AKLLGLTLVGLVGLVLYK                          | +3                       | 595.72     | 1784.15       | 1784.15 0                  | 50 2                           |
|       | LLGLTLVGLVGLVGLVLYK                         | +3                       | 665.09     | 1992.23       | 1992.22 0.01               | 50 4                           |

| No.   | Protein                                     | Matched (SEQUEST MASCOT) | emPAI      | Strategy.Hits | PepMatched(SEQUEST MASCOT) | SpectraMatched(SEQUEST MASCOT) |
|-------|---------------------------------------------|--------------------------|------------|---------------|----------------------------|--------------------------------|
| 405.  | IPI00370752                                 | Y Y                      | 1.1        | 1             | 5 5 10                     | 11                             |
| *Des: | PREDICTED: similar to Nit protein 2         |                          |            |               |                            |                                |
|       | SEQUEST:(PepMatched Observed.Hits Coverage) |                          |            | 5             | 1                          | 22.04%                         |
|       | Seq                                         | Charge Xcor              | Delta      | Proability    | PepHits                    |                                |
|       | AVDNQVYVATASPAR                             | +2                       | 4.572      | 0.559         | 1.0000                     | 4                              |
|       | FAELAQIYAR                                  | +2                       | 3.096      | 0.287         | 0.9967                     | 1                              |
|       | KIHLFDIDVPGK                                | +3                       | 4.103      | 0.442         | 1.0000                     | 1                              |
|       | AGTEETILYSDIDLK                             | +2                       | 4.656      | 0.459         | 1.0000                     | 1                              |
|       | LALIQLQVSSIK                                | +2                       | 3.704      | 0.422         | 0.9999                     | 9                              |
|       | MASCOT:(PepMatched Observed.Hits Coverage)  |                          |            | 5             | 2                          | 22.04%                         |
|       | Seq                                         | Charge ObservedMS        | ExpectedMS | CalculatedMS  |                            | Pepscore PepHits               |
|       | AVDNQVYVATASPAR                             | +2 781.41                | 1560.80    | 1560.79 0.01  | 76                         | 3                              |
|       | FAELAQIYAR                                  | +2 591.32                | 1180.63    | 1180.62 0.01  | 55 1                       |                                |
|       | KIHLFDIDVPGK                                | +3 461.27                | 1380.79    | 1380.78 0.01  | 44 1                       |                                |
|       | AGTEETILYSDIDLK                             | +2 834.43                | 1666.85    | 1666.83 0.02  | 84 1                       |                                |
|       | LALIQLQVSSIK                                | +2 656.92                | 1311.82    | 1311.81 0.01  | 71 11                      |                                |

| No.   | Protein                                     | Matched (SEQUEST MASCOT) | emPAI      | Strategy.Hits  | PepMatched(SEQUEST MASCOT) | SpectraMatched(SEQUEST MASCOT) |
|-------|---------------------------------------------|--------------------------|------------|----------------|----------------------------|--------------------------------|
| 406.  | IPI00231192                                 | N Y                      | 0.73       | 1              | 0 6 0                      | 37                             |
| *Des: | Hemoglobin beta chain, minor-form           |                          |            |                |                            |                                |
|       | SEQUEST:(PepMatched Observed.Hits Coverage) |                          |            | 6              | 1                          | 51.67%                         |
|       | MASCOT:(PepMatched Observed.Hits Coverage)  |                          |            | 6              | 1                          | 51.67%                         |
|       | Seq                                         | Charge ObservedMS        | ExpectedMS | CalculatedMS   |                            | Pepscore PepHits               |
|       | VINAFNDGLK                                  | +2 545.8022              | 1089.5898  | 1089.5818 0.01 | 42                         | 4                              |
|       | KVINAFNDGLK                                 | +2 609.8498              | 1217.6850  | 1217.6768 0.01 | 63                         | 6                              |

Identified Human Platelet Proteins

|                         |    |          |           |           |      |    |    |
|-------------------------|----|----------|-----------|-----------|------|----|----|
| FGDLSSASAIMGNPQVK       | +2 | 861.4402 | 1720.8659 | 1720.8454 | 0.02 | 64 | 1  |
| LLVVYPWTQR              | +2 | 637.8699 | 1273.7252 | 1273.7183 | 0.01 | 55 | 19 |
| GTF AHLSELHCDKLHVDPENFR | +3 | 855.7529 | 2564.2368 | 2564.2230 | 0.01 | 66 | 2  |
| VVAGVASALAHK            | +2 | 561.8383 | 1121.6621 | 1121.6556 | 0.01 | 71 | 12 |

No. 407. Protein IPI00568706 Matched (SEQUEST MASCOT) N Y emPAI Strategy.Hits 0.16 1 PepMatched(SEQUEST MASCOT) 0 3 SpectraMatched(SEQUEST MASCOT) 0 8

\*Des: 69 kDa protein

SEQUEST:(PepMatched Observed.Hits Coverage)

MASCOT:(PepMatched Observed.Hits Coverage)

|                     |        |            |            |              |          |         |
|---------------------|--------|------------|------------|--------------|----------|---------|
| Seq                 | Charge | ObservedMS | ExpectedMS | CalculatedMS | PepScore | PepHits |
| DGTLVSGGGR          | +2     | 459.7373   | 917.4601   | 917.4566     | 0        | 53      |
| QITSADTVR           | +2     | 495.7660   | 989.5174   | 989.5142     | 0        | 50      |
| SAGFHPSGSVLAVGTVTGR | +2     | 900.4777   | 1798.9409  | 1798.9325    | 0.01     | 78      |

No. 408. Protein IPI00370681 Matched (SEQUEST MASCOT) Y Y emPAI Strategy.Hits 0.67 2 PepMatched(SEQUEST MASCOT) 5 3 SpectraMatched(SEQUEST MASCOT) 9 5

\*Des: Capping protein (aCtin filament) musCle Z-line, alpha 2

SEQUEST:(PepMatched Observed.Hits Coverage)

|                            |        |       |       |            |         |
|----------------------------|--------|-------|-------|------------|---------|
| Seq                        | Charge | Xcor  | Delta | Proability | PepHits |
| DIQDSLTVSNEVQTAK           | +2     | 4.092 | 0.345 | 0.9990     | 3       |
| IEGYEDQVLITEHGDLGNGK       | +3     | 3.388 | 0.323 | 0.9974     | 2       |
| EGAAHAFQAQYNLDQFTPVK       | +2     | 5.103 | 0.639 | 1.0000     | 2       |
| IVEAAENEYQTAISENYQTMSDITFK | +3     | 6.324 | 0.537 | 1.0000     | 1       |
| FIHAPPGEFNEVFNDVR          | +3     | 4.253 | 0.396 | 0.9997     | 3       |

MASCOT:(PepMatched Observed.Hits Coverage)

|                            |        |            |            |              |          |         |
|----------------------------|--------|------------|------------|--------------|----------|---------|
| Seq                        | Charge | ObservedMS | ExpectedMS | CalculatedMS | PepScore | PepHits |
| DIQDSLTVSNEVQTAK           | +2     | 874.44     | 1746.87    | 1746.86      | 0.01     | 72      |
| EGAAHAFQAQYNLDQFTPVK       | +3     | 703.01     | 2106.02    | 2106.02      | 0        | 45      |
| IVEAAENEYQTAISENYQTMSDITFK | +3     | 995.13     | 2982.36    | 2982.34      | 0.02     | 86      |

No. 409. Protein IPI00193607 Matched (SEQUEST MASCOT) Y Y emPAI Strategy.Hits 0.29 1 PepMatched(SEQUEST MASCOT) 4 2 SpectraMatched(SEQUEST MASCOT) 11 9

\*Des: PREDICTED: similar to triggering receptor expressed on myeloid cells-like 1

SEQUEST:(PepMatched Observed.Hits Coverage)

|                          |        |       |       |            |         |
|--------------------------|--------|-------|-------|------------|---------|
| Seq                      | Charge | Xcor  | Delta | Proability | PepHits |
| KPPAPPPEPPLPPK           | +2     | 3.627 | 0.508 | 0.9999     | 13      |
| PVTYATVVFPGR             | +2     | 3.474 | 0.538 | 0.9997     | 1       |
| LDSPPSFDSIYTDPSLDPPSR    | +2     | 4.712 | 0.550 | 1.0000     | 1       |
| IFLDMGGGLLQVEMVSLQEEDTGK | +2     | 6.103 | 0.630 | 1.0000     | 2       |

MASCOT:(PepMatched Observed.Hits Coverage)

|                          |        |            |            |              |          |         |
|--------------------------|--------|------------|------------|--------------|----------|---------|
| Seq                      | Charge | ObservedMS | ExpectedMS | CalculatedMS | PepScore | PepHits |
| KPPAPPPEPPLPPK           | +2     | 731.43     | 1460.85    | 1460.84      | 0.01     | 63      |
| IFLDMGGGLLQVEMVSLQEEDTGK | +3     | 904.12     | 2709.33    | 2709.32      | 0.01     | 51      |

No. 410. Protein IPI00363395 Matched (SEQUEST MASCOT) Y Y emPAI Strategy.Hits 2.3 5 PepMatched(SEQUEST MASCOT) 2 8 SpectraMatched(SEQUEST MASCOT) 4 44

Identified Human Platelet Proteins

\*Des: Ras-related protein Rap-1b

| SEQUEST:(PepMatched Observed.Hits Coverage) |        | 2          | 1          | 12.23%       |         |        |          |         |  |
|---------------------------------------------|--------|------------|------------|--------------|---------|--------|----------|---------|--|
| Seq                                         | Charge | Xcor       | Delta      | Probility    | PepHits |        |          |         |  |
| VKDTDDVPMILVGNK                             |        |            | +2         | 4.719        | 0.498   | 1.0000 | 4        |         |  |
| VKDTDDVPMILVGNKCDLEDER                      |        |            |            | +3           | 5.214   | 0.498  | 1.0000   | 2       |  |
| MASCOT:(PepMatched Observed.Hits Coverage)  |        | 8          | 13         | 55.85%       |         |        |          |         |  |
| Seq                                         | Charge | ObservedMS | ExpectedMS | CalculatedMS |         |        | Pepscore | PepHits |  |
| VVGKEQQQLAR                                 | +2     | 649.86     | 1297.71    | 1297.71      | 0       | 48     | 6        |         |  |
| EYKLVVLGSGGVGK+2                            |        | 703.40     | 1404.79    | 1404.80      | 0       | 65     | 4        |         |  |
| VKDTDDVPMILVGNK                             | +2     | 822.44     | 1642.87    | 1642.86      | 0.01    | 64     | 3        |         |  |
| MREYKLVVLGSGGVGK                            | +2     | 846.98     | 1691.94    | 1691.94      | 0       | 114    | 6        |         |  |
| SALTVQFVQGIFVEK                             | +2     | 833.47     | 1664.92    | 1664.91      | 0.01    | 66     | 10       |         |  |
| SKINVNEIFYDLVR                              | +2     | 855.47     | 1708.92    | 1708.91      | 0.01    | 80     | 10       |         |  |
| SALTVQFVQGIFVEKYDPTIEDSYR                   | +3     | 969.16     | 2904.46    | 2904.45      | 0.01    | 73     | 4        |         |  |
| INVNEIFYDLVRQINRK                           | +3     | 712.07     | 2133.17    | 2133.17      | 0       | 42     | 2        |         |  |

| No.  | Protein     | Matched (SEQUEST MASCOT) | emPAI | Strategy.Hits | PepMatched(SEQUEST MASCOT) | SpectraMatched(SEQUEST MASCOT) |
|------|-------------|--------------------------|-------|---------------|----------------------------|--------------------------------|
| 411. | IPI00210071 | Y Y                      | 0.42  | 4             | 7 6                        | 17 16                          |

\*Des: CORO1A protein

| SEQUEST:(PepMatched Observed.Hits Coverage) |        | 7          | 6          | 20.46%       |         |        |          |         |  |
|---------------------------------------------|--------|------------|------------|--------------|---------|--------|----------|---------|--|
| Seq                                         | Charge | Xcor       | Delta      | Probility    | PepHits |        |          |         |  |
| ADQCYEDVR                                   | +2     | 3.005      | 0.339      | 0.9976       | 3       |        |          |         |  |
| VSQTTWDSGFCVAVNPK                           | +2     | 3.930      | 0.508      | 1.0000       | 3       |        |          |         |  |
| KSDLFQEDLYPPTAGPDPALTAEEWLSGR               |        |            | +3         | 6.484        | 0.654   | 1.0000 | 2        |         |  |
| HVFGQPAKADQCYEDVR                           | +3     | 3.402      | 0.521      | 1.0000       | 1       |        |          |         |  |
| RGLEVNKCEIAR                                | +3     | 3.494      | 0.461      | 1.0000       | 7       |        |          |         |  |
| HVFGQPAK                                    | +2     | 2.490      | 0.426      | 0.9982       | 24      |        |          |         |  |
| DAGPLLISLKDGYVPPK                           | +2     | 3.823      | 0.416      | 0.9971       | 9       |        |          |         |  |
| MASCOT:(PepMatched Observed.Hits Coverage)  |        | 6          | 5          | 14.49%       |         |        |          |         |  |
| Seq                                         | Charge | ObservedMS | ExpectedMS | CalculatedMS |         |        | Pepscore | PepHits |  |
| NLNAIVQK                                    | +2     | 450.2719   | 898.5292   | 898.5236     | 0.01    | 42     | 2        |         |  |
| DGALICTSCR                                  | +2     | 519.7416   | 1037.4687  | 1037.4634    | 0.01    | 58     | 2        |         |  |
| VSQTTWDSGFCVAVNPK                           | +2     | 870.4139   | 1738.8132  | 1738.7984    | 0.01    | 77     | 3        |         |  |
| DAGPLLISLK                                  | +2     | 513.8167   | 1025.6189  | 1025.6121    | 0.01    | 60     | 3        |         |  |
| RGLEVNKCEIAR                                | +3     | 463.2560   | 1386.7460  | 1386.7401    | 0.01    | 53     | 7        |         |  |
| DAGPLLISLKDGYVPPK                           | +2     | 892.0103   | 1782.0061  | 1781.9927    | 0.01    | 64     | 9        |         |  |

| No.  | Protein     | Matched (SEQUEST MASCOT) | emPAI | Strategy.Hits | PepMatched(SEQUEST MASCOT) | SpectraMatched(SEQUEST MASCOT) |
|------|-------------|--------------------------|-------|---------------|----------------------------|--------------------------------|
| 412. | IPI00564353 | N Y                      | 1.89  | 1             | 0 6                        | 0 28                           |

\*Des: 47 kDa protein

| SEQUEST:(PepMatched Observed.Hits Coverage) |        | 6          | 1          | 20.09%       |   |    |          |         |
|---------------------------------------------|--------|------------|------------|--------------|---|----|----------|---------|
| Seq                                         | Charge | ObservedMS | ExpectedMS | CalculatedMS |   |    | Pepscore | PepHits |
| TLLLQDNTLR                                  | +2     | 593.84     | 1185.67    | 1185.67      | 0 | 62 | 8        |         |
| TLSLAENSLTR                                 | +2     | 602.83     | 1203.65    | 1203.65      | 0 | 55 | 4        |         |
| LAAGMALNSGGLGR                              | +2     | 644.35     | 1286.68    | 1286.68      | 0 | 81 | 16       |         |
| AVSLEVLDLR                                  | +2     | 557.83     | 1113.64    | 1113.64      | 0 | 57 | 4        |         |

Identified Human Platelet Proteins

|                       |    |        |         |         |   |    |   |
|-----------------------|----|--------|---------|---------|---|----|---|
| ELPPYTFAGLASLQR       | +2 | 831.95 | 1661.88 | 1661.88 | 0 | 43 | 8 |
| LPLVVSLDLSGNSLHGSLVER | +3 | 735.75 | 2204.21 | 2204.22 | 0 | 65 | 4 |

No. 413. Protein IPI00339197 Matched (SEQUEST MASCOT) N Y emPAI Strategy.Hits 1.08 1 PepMatched(SEQUEST MASCOT) 0 SpectraMatched(SEQUEST MASCOT) 9 0 35

\*Des: 58 kDa protein

SEQUEST:(PepMatched Observed.Hits Coverage)

MASCOT:(PepMatched Observed.Hits Coverage)

| Seq                       | Charge | ObservedMS | ExpectedMS | CalculatedMS | PepScore | PepHits |
|---------------------------|--------|------------|------------|--------------|----------|---------|
| FDEILEASDGIMVAR           | +2     | 833.4252   | 1664.8359  | 1664.8079    | 0.03     | 105     |
| EAEAAIYHLQLFEELRR         | +3     | 696.7125   | 2087.1156  | 2087.0799    | 0.04     | 41      |
| AEGSDVANAVLDGADCIMLSGETAK | +3     | 813.0612   | 2436.1618  | 2436.1148    | 0.05     | 41      |
| GDLGIEIPAEK               | +2     | 571.3184   | 1140.6223  | 1140.6026    | 0.02     | 38      |
| DAVLDAWAEDVDLR            | +2     | 794.4008   | 1586.7870  | 1586.7576    | 0.03     | 107     |
| GADYLVTEVENGGSLGSK        | +2     | 898.9482   | 1795.8818  | 1794.8635    | 1.02     | 94      |
| RFDEILEASDGIMVAR          | +2     | 911.4796   | 1820.9447  | 1820.9090    | 0.04     | 75      |
| FGVEQDVDMVFASFIR          | +2     | 930.4693   | 1858.9240  | 1858.8923    | 0.03     | 124     |
| EAEAAIYHLQLFEELR          | +2     | 966.5156   | 1931.0166  | 1930.9788    | 0.04     | 91      |

No. 414. Protein IPI00421806 Matched (SEQUEST MASCOT) N Y emPAI Strategy.Hits 0.02 1 PepMatched(SEQUEST MASCOT) 0 SpectraMatched(SEQUEST MASCOT) 2 0 3

\*Des: Type I keratin KA10

SEQUEST:(PepMatched Observed.Hits Coverage)

MASCOT:(PepMatched Observed.Hits Coverage)

| Seq        | Charge | ObservedMS | ExpectedMS | CalculatedMS | PepScore | PepHits |
|------------|--------|------------|------------|--------------|----------|---------|
| LENEIQTYR  | +2     | 583.2969   | 1164.5793  | 1164.5775    | 0        | 44      |
| LKYENEVALR | +2     | 617.8419   | 1233.6692  | 1233.6717    | 0        | 47      |

No. 415. Protein IPI00389749 Matched (SEQUEST MASCOT) N Y emPAI Strategy.Hits 0.11 3 PepMatched(SEQUEST MASCOT) 0 SpectraMatched(SEQUEST MASCOT) 5 0 13

\*Des: Splice Isoform IIA of Dynamin-2

SEQUEST:(PepMatched Observed.Hits Coverage)

MASCOT:(PepMatched Observed.Hits Coverage)

| Seq                           | Charge | ObservedMS | ExpectedMS | CalculatedMS | PepScore | PepHits |
|-------------------------------|--------|------------|------------|--------------|----------|---------|
| QEIEAETDR                     | +2     | 545.7634   | 1089.5122  | 1089.4938    | 0.02     | 39      |
| ALLQMVQQFGVDFEK               | +2     | 876.9711   | 1751.9276  | 1751.8916    | 0.04     | 94      |
| IEGSGDQVDTLELSSGAR            | +2     | 902.4549   | 1802.8952  | 1802.8646    | 0.03     | 86      |
| AGVYPEKDQAENEDGAQENTFSMDPQLER | +3     | 1090.1699  | 3267.4879  | 3267.4261    | 0.06     | 48      |
| LDLMDEGTDAR                   | +2     | 618.2918   | 1234.5691  | 1234.5499    | 0.02     | 66      |

No. 416. Protein IPI00324633 Matched (SEQUEST MASCOT) Y Y emPAI Strategy.Hits 0.22 2 PepMatched(SEQUEST MASCOT) 4 SpectraMatched(SEQUEST MASCOT) 4 6 12

\*Des: Glutamate dehydrogenase 1, mitochondrial precursor

SEQUEST:(PepMatched Observed.Hits Coverage)

| Seq                   | Charge | Xcor  | Delta | Probility | PepHits |
|-----------------------|--------|-------|-------|-----------|---------|
| IIAEGANGPTTPEADKIFLER | +3     | 4.041 | 0.569 | 1.0000    | 1       |
| GFIGPGIDVPAPDMSTGER   | +2     | 4.764 | 0.572 | 1.0000    | 2       |



Identified Human Platelet Proteins

| Seq                                                 | Charge | ObservedMS | ExpectedMS | CalculatedMS | Pepscore | PepHits |
|-----------------------------------------------------|--------|------------|------------|--------------|----------|---------|
| GVFHGIENFINEASYMSILGMPGLGDK                         | +3     | 3.326      | 0.411      | 0.9990       | 1        |         |
| IIAEGANGPTTPEADK                                    | +2     | 4.877      | 0.541      | 1.0000       | 2        |         |
| MASCOT:(PepMatched Observed.Hits Coverage) 4 2 9.5% |        |            |            |              |          |         |
| YSTDVSVDEVK                                         | +2     | 621.30     | 1240.59    | 1240.58      | 0.01     | 41 4    |
| IIAEGANGPTTPEADK                                    | +2     | 792.40     | 1582.78    | 1582.78      | 0        | 73 4    |
| IIAEGANGPTTPEADKIFLER                               | +3     | 748.07     | 2241.18    | 2241.16      | 0.02     | 64 2    |
| GFIGPGIDVPAPDMSTGER                                 | +2     | 958.46     | 1914.91    | 1914.91      | 0        | 72 4    |

No. 417. Protein IPI00324561 Matched (SEQUEST MASCOT) Y Y emPAI Strategy.Hits 0.27 3 PepMatched(SEQUEST MASCOT) 5 SpectraMatched(SEQUEST MASCOT) 8 9 30

\*Des: Tyrosine-protein phosphatase, non-receptor type 11

| Seq                                                    | Charge | Xcor       | Delta      | Probility    | PepHits  |         |
|--------------------------------------------------------|--------|------------|------------|--------------|----------|---------|
| SEQUEST:(PepMatched Observed.Hits Coverage) 5 3 12.27% |        |            |            |              |          |         |
| SGMVQTEAQYR                                            | +2     | 3.118      | 0.422      | 0.9991       | 3        |         |
| QGFWEFETLQQECK                                         | +2     | 4.150      | 0.617      | 1.0000       | 1        |         |
| GVDGSFLARPSK                                           | +2     | 2.863      | 0.433      | 0.9985       | 4        |         |
| FIYMAVQHYIETLQR                                        | +2     | 4.805      | 0.417      | 1.0000       | 4        |         |
| KNPMVETLGTVLQLK                                        | +2     | 4.122      | 0.332      | 0.9986       | 2        |         |
| MASCOT:(PepMatched Observed.Hits Coverage) 8 5 15.58%  |        |            |            |              |          |         |
| Seq                                                    | Charge | ObservedMS | ExpectedMS | CalculatedMS | Pepscore | PepHits |
| SGMVQTEAQYR                                            | +2     | 635.3027   | 1268.5908  | 1268.5819    | 0.01     | 53 8    |
| INAAEIESR                                              | +2     | 501.7675   | 1001.5204  | 1001.5141    | 0.01     | 50 4    |
| NGAVTHIK                                               | +2     | 420.2433   | 838.4720   | 838.4661     | 0.01     | 46 6    |
| VTHVMIR                                                | +2     | 428.1931   | 854.3716   | 854.4796     | -0.1     | 44 4    |
| GVDGSFLARPSK                                           | +2     | 617.3375   | 1232.6604  | 1232.6513    | 0.01     | 61 4    |
| FIYMAVQHYIETLQR                                        | +2     | 956.4997   | 1910.9848  | 1910.9712    | 0.01     | 95 6    |
| KNPMVETLGTVLQLK                                        | +2     | 835.9850   | 1669.9555  | 1669.9436    | 0.01     | 61 4    |
| WFHGHLSGK                                              | +2     | 534.7769   | 1067.5393  | 1067.5301    | 0.01     | 42 2    |

No. 418. Protein IPI00368550 Matched (SEQUEST MASCOT) N Y emPAI Strategy.Hits 0.07 1 PepMatched(SEQUEST MASCOT) 0 SpectraMatched(SEQUEST MASCOT) 3 0 5

\*Des: PREDICTED: complement component 5

| Seq                                                   | Charge | ObservedMS | ExpectedMS | CalculatedMS | Pepscore | PepHits |
|-------------------------------------------------------|--------|------------|------------|--------------|----------|---------|
| SEQUEST:(PepMatched Observed.Hits Coverage) 3 1 4.42% |        |            |            |              |          |         |
| MASCOT:(PepMatched Observed.Hits Coverage) 3 1 4.42%  |        |            |            |              |          |         |
| VTYSSGYVNLSPENK                                       | +2     | 829.41     | 1656.81    | 1656.80      | 0.01     | 69 2    |
| DENPVSHVYLEVSMHFSK                                    | +3     | 739.69     | 2216.06    | 2216.06      | 0        | 50 2    |
| SITHSADGVASFVVNLPSEVTSLK                              | +3     | 820.10     | 2457.28    | 2457.28      | 0        | 43 2    |

No. 419. Protein IPI00198620 Matched (SEQUEST MASCOT) Y Y emPAI Strategy.Hits 5.07 2 PepMatched(SEQUEST MASCOT) 3 SpectraMatched(SEQUEST MASCOT) 2 5 5

\*Des: ATP synthase delta chain, mitochondrial precursor

| Seq                                                    | Charge | Xcor  | Delta | Probility | PepHits |
|--------------------------------------------------------|--------|-------|-------|-----------|---------|
| SEQUEST:(PepMatched Observed.Hits Coverage) 3 1 17.54% |        |       |       |           |         |
| AEIQIRIEANEALVK                                        | +3     | 3.726 | 0.439 | 0.9944    | 3       |
| AQSELGGADEAARAEIQIRIEANEALVK                           | +3     | 4.078 | 0.630 | 0.9995    | 1       |

Identified Human Platelet Proteins

|                                            |                                                 |                              |              |                 |                               |                                   |    |          |         |
|--------------------------------------------|-------------------------------------------------|------------------------------|--------------|-----------------|-------------------------------|-----------------------------------|----|----------|---------|
|                                            | AQSELSGADEAAR+2                                 | 4.117                        | 0.668        | 1.0000          | 1                             |                                   |    |          |         |
| MASCOT:(PepMatched Observed.Hits Coverage) |                                                 | 2                            | 1            | 14.61%          |                               |                                   |    |          |         |
|                                            | Seq Charge ObservedMS                           |                              | ExpectedMS   | CalculatedMS    |                               |                                   |    | PepScore | PepHits |
|                                            | AQSELSGADEAAR+2                                 | 688.3344                     | 1374.6543    | 1374.6375       | 0.02                          | 69                                | 1  |          |         |
|                                            | IEANEALVK +2                                    | 493.7853                     | 985.5561     | 985.5444        | 0.01                          | 56                                | 6  |          |         |
| No. 420.                                   | Protein IPI00390070                             | Matched (SEQUENT MASCOT) Y N | emPAI 0.1    | Strategy.Hits 1 | PepMatched (SEQUENT MASCOT) 2 | SpectraMatched (SEQUENT MASCOT) 0 |    |          |         |
| *Des:                                      | 81 kDa protein                                  |                              |              |                 |                               |                                   |    |          |         |
|                                            | SEQUENT:(PepMatched Observed.Hits Coverage)     | 2                            | 1            | 3.76%           |                               |                                   |    |          |         |
|                                            | Seq Charge Xcor Delta                           | Probility                    | PepHits      |                 |                               |                                   |    |          |         |
|                                            | IDIIPNPQER +2                                   | 3.055                        | 0.329        | 0.9977          | 2                             |                                   |    |          |         |
|                                            | NPDDITQEEYGEFYK +2                              | 4.986                        | 0.527        | 1.0000          | 3                             |                                   |    |          |         |
|                                            | MASCOT:(PepMatched Observed.Hits Coverage)      |                              |              |                 |                               |                                   |    |          |         |
| No. 421.                                   | Protein IPI00199425                             | Matched (SEQUENT MASCOT) N Y | emPAI 0.3    | Strategy.Hits 2 | PepMatched (SEQUENT MASCOT) 0 | SpectraMatched (SEQUENT MASCOT) 4 | 0  | 69       |         |
| *Des:                                      | 61 kDa protein                                  |                              |              |                 |                               |                                   |    |          |         |
|                                            | SEQUENT:(PepMatched Observed.Hits Coverage)     |                              |              |                 |                               |                                   |    |          |         |
|                                            | MASCOT:(PepMatched Observed.Hits Coverage)      | 4                            | 2            | 8.68%           |                               |                                   |    |          |         |
|                                            | Seq Charge ObservedMS                           | ExpectedMS                   | CalculatedMS |                 |                               |                                   |    | PepScore | PepHits |
|                                            | LVINSGNGTVEDR +2                                | 687.85                       | 1373.69      | 1372.69         | 1                             | 56                                | 12 |          |         |
|                                            | EPTETPDQFMTADETR +2                             | 934.41                       | 1866.80      | 1866.79         | 0.01                          | 60                                | 18 |          |         |
|                                            | GFETCRYGFIEGHVVIPR +3                           | 693.88                       | 2078.63      | 2079.04         | -0.4                          | 48                                | 9  |          |         |
|                                            | YGFIEGHVVIPR +2                                 | 693.88                       | 1385.75      | 1385.75         | 0                             | 64                                | 30 |          |         |
| No. 422.                                   | Protein IPI00331856                             | Matched (SEQUENT MASCOT) Y Y | emPAI 0.28   | Strategy.Hits 1 | PepMatched (SEQUENT MASCOT) 3 | SpectraMatched (SEQUENT MASCOT) 4 | 11 | 11       |         |
| *Des:                                      | Carbonyl reductase [NADPH] 1                    |                              |              |                 |                               |                                   |    |          |         |
|                                            | SEQUENT:(PepMatched Observed.Hits Coverage)     | 3                            | 2            | 18.14%          |                               |                                   |    |          |         |
|                                            | Seq Charge Xcor Delta                           | Probility                    | PepHits      |                 |                               |                                   |    |          |         |
|                                            | VVNVSSTVSLR +2                                  | 2.784                        | 0.257        | 0.9727          | 2                             |                                   |    |          |         |
|                                            | SETITEEELVGLMKNK+2                              | 4.087                        | 0.389        | 0.9991          | 1                             |                                   |    |          |         |
|                                            | DFLLQEYGGLNVLVNNAGIAFK +3                       | 4.311                        | 0.432        | 0.9997          | 1                             |                                   |    |          |         |
|                                            | MASCOT:(PepMatched Observed.Hits Coverage)      | 4                            | 1            | 17.43%          |                               |                                   |    |          |         |
|                                            | Seq Charge ObservedMS                           | ExpectedMS                   | CalculatedMS |                 |                               |                                   |    | PepScore | PepHits |
|                                            | EGWPNSAYGVTK +2                                 | 654.82                       | 1307.62      | 1307.61         | 0.01                          | 41                                | 4  |          |         |
|                                            | IGVTVLSR +2                                     | 422.77                       | 843.52       | 843.52          | 0                             | 42                                | 3  |          |         |
|                                            | FLGDVLTAR +2                                    | 545.82                       | 1089.62      | 1089.62         | 0                             | 53                                | 3  |          |         |
|                                            | SETITEEELVGLMKNK+2                              | 846.92                       | 1691.83      | 1691.83         | 0                             | 92                                | 3  |          |         |
| No. 423.                                   | Protein IPI00560148                             | Matched (SEQUENT MASCOT) N Y | emPAI 0.06   | Strategy.Hits 1 | PepMatched (SEQUENT MASCOT) 0 | SpectraMatched (SEQUENT MASCOT) 2 | 0  | 2        |         |
| *Des:                                      | PREDICTED: similar to Testis derived transcript |                              |              |                 |                               |                                   |    |          |         |
|                                            | SEQUENT:(PepMatched Observed.Hits Coverage)     |                              |              |                 |                               |                                   |    |          |         |
|                                            | MASCOT:(PepMatched Observed.Hits Coverage)      | 2                            | 1            | 3.14%           |                               |                                   |    |          |         |
|                                            | Seq Charge ObservedMS                           | ExpectedMS                   | CalculatedMS |                 |                               |                                   |    | PepScore | PepHits |

Identified Human Platelet Proteins

|                |    |          |           |           |      |    |   |
|----------------|----|----------|-----------|-----------|------|----|---|
| EKQPVAGSEGAQYR | +3 | 507.2584 | 1518.7534 | 1518.7426 | 0.01 | 46 | 1 |
| NVMILTNPVAAK   | +2 | 635.8687 | 1269.7229 | 1269.7114 | 0.01 | 46 | 1 |

|          |                                                               |                          |            |               |                            |                                |                  |
|----------|---------------------------------------------------------------|--------------------------|------------|---------------|----------------------------|--------------------------------|------------------|
| No. 424. | Protein                                                       | Matched (SEQUEST MASCOT) | emPAI      | Strategy.Hits | PepMatched(SEQUEST MASCOT) | SpectraMatched(SEQUEST MASCOT) |                  |
|          | IPI00359734                                                   | Y Y                      | 0.64       | 1             | 7 7                        | 29                             | 40               |
| *Des:    | PREDICTED: similar to predominantly fetal expressed T1 domain |                          |            |               |                            |                                |                  |
|          | SEQUEST:(PepMatched Observed.Hits Coverage)                   |                          | 7          | 2             | 27.32%                     |                                |                  |
|          | Seq                                                           | Charge                   | Xcor       | Delta         | Probility                  | PepHits                        |                  |
|          | MFTQQQPQELAR                                                  | +2                       |            | 4.730         | 0.506                      | 1.0000                         | 7                |
|          | SPSGGAAGPLLTPSQSLDGSR                                         | +2                       |            | 5.552         | 0.663                      | 1.0000                         | 2                |
|          | SGYITIGYR                                                     | +2                       |            | 3.354         | 0.521                      | 1.0000                         | 2                |
|          | YILDYLR                                                       | +2                       | 2.901      | 0.253         | 0.9958                     | 3                              |                  |
|          | EAEYFELPELVR                                                  | +2                       |            | 4.286         | 0.474                      | 1.0000                         | 13               |
|          | FNFLEQAQFDK                                                   | +2                       |            | 2.481         | 0.332                      | 0.9914                         | 13               |
|          | DLQLVLPDYFPER                                                 | +2                       |            | 3.397         | 0.304                      | 0.9967                         | 5                |
|          | MASCOT:(PepMatched Observed.Hits Coverage)                    |                          | 7          | 1             | 28.52%                     |                                |                  |
|          | Seq                                                           | Charge                   | ObservedMS | ExpectedMS    | CalculatedMS               |                                | Pepscore PepHits |
|          | MFTQQQPQELAR                                                  | +2                       | 738.87     | 1475.73       | 1475.72                    | 0.01                           | 91 7             |
|          | EVFGDTLNESR                                                   | +2                       | 633.81     | 1265.60       | 1265.59                    | 0.01                           | 61 16            |
|          | SGYITIGYR                                                     | +2                       | 515.28     | 1028.54       | 1028.53                    | 0.01                           | 68 3             |
|          | SPSGGAAGPLLTPSQSLDGSR                                         | +2                       | 978.01     | 1954.00       | 1953.98                    | 0.02                           | 116 2            |
|          | FNFLEQAQFDK                                                   | +2                       | 629.81     | 1257.61       | 1257.60                    | 0.01                           | 77 14            |
|          | EAEYFELPELVR                                                  | +2                       | 747.88     | 1493.75       | 1493.74                    | 0.01                           | 70 13            |
|          | DLQLVLPDYFPER                                                 | +2                       | 802.93     | 1603.84       | 1603.82                    | 0.02                           | 55 3             |

|          |                                             |                          |            |               |                            |                                |                  |
|----------|---------------------------------------------|--------------------------|------------|---------------|----------------------------|--------------------------------|------------------|
| No. 425. | Protein                                     | Matched (SEQUEST MASCOT) | emPAI      | Strategy.Hits | PepMatched(SEQUEST MASCOT) | SpectraMatched(SEQUEST MASCOT) |                  |
|          | IPI00215302                                 | Y Y                      | 0.72       | 2             | 2 2                        | 3                              | 3                |
| *Des:    | Metalloproteinase inhibitor 3 precursor     |                          |            |               |                            |                                |                  |
|          | SEQUEST:(PepMatched Observed.Hits Coverage) |                          | 2          | 1             | 14.41%                     |                                |                  |
|          | Seq                                         | Charge                   | Xcor       | Delta         | Probility                  | PepHits                        |                  |
|          | GWAPPDKSISNATD                              | +2                       |            | 3.507         | 0.535                      | 0.9599                         | 1                |
|          | EGPFGTLVYTIKQMK                             | +2                       |            | 3.975         | 0.599                      | 0.9936                         | 3                |
|          | MASCOT:(PepMatched Observed.Hits Coverage)  |                          | 2          | 2             | 14.88%                     |                                |                  |
|          | Seq                                         | Charge                   | ObservedMS | ExpectedMS    | CalculatedMS               |                                | Pepscore PepHits |
|          | GWAPPDKSISNATDP                             | +2                       | 778.37     | 1554.73       | 1554.73                    | 0                              | 48 1             |
|          | EGPFGTLVYTIKQMK                             | +2                       | 856.46     | 1710.91       | 1710.90                    | 0.01                           | 59 2             |

|          |                                                 |                          |       |               |                            |                                |   |
|----------|-------------------------------------------------|--------------------------|-------|---------------|----------------------------|--------------------------------|---|
| No. 426. | Protein                                         | Matched (SEQUEST MASCOT) | emPAI | Strategy.Hits | PepMatched(SEQUEST MASCOT) | SpectraMatched(SEQUEST MASCOT) |   |
|          | IPI00400615                                     | Y Y                      | 1.09  | 1             | 4 3                        | 5                              | 4 |
| *Des:    | ATPase, H+ transporting, V1 subunit E isoform 1 |                          |       |               |                            |                                |   |
|          | SEQUEST:(PepMatched Observed.Hits Coverage)     |                          | 4     | 1             | 26.95%                     |                                |   |
|          | Seq                                             | Charge                   | Xcor  | Delta         | Probility                  | PepHits                        |   |
|          | IQMSNLMNQAR                                     | +2                       |       | 2.860         | 0.330                      | 0.9919                         | 1 |
|          | LDLIAQQMMPEVR                                   | +2                       |       | 2.796         | 0.446                      | 0.9976                         | 1 |
|          | ARDDLITDLLNEAK                                  | +2                       |       | 3.817         | 0.394                      | 0.9858                         | 2 |
|          | YQVLLDGLVLQGLYQLLEPR                            | +2                       |       | 4.559         | 0.383                      | 0.9994                         | 2 |
|          | MASCOT:(PepMatched Observed.Hits Coverage)      |                          | 3     | 1             | 17.82%                     |                                |   |

Identified Human Platelet Proteins

| Seq            | Charge | ObservedMS | ExpectedMS | CalculatedMS | Pepscore | PepHits |
|----------------|--------|------------|------------|--------------|----------|---------|
| IQMSNLMNQAR    | +2     | 653.32     | 1304.63    | 1304.63      | 0        | 50      |
| LDLIAQQMMPEVR  | +2     | 772.41     | 1542.80    | 1542.79      | 0.01     | 52      |
| ARDDLITDLLNEAK | +2     | 793.93     | 1585.84    | 1585.83      | 0.01     | 72      |

No. 427. Protein IPI00464786 Matched (SEQUEST MASCOT) Y N emPAI 0.27 Strategy.Hits 1 PepMatched(SEQUEST MASCOT) 2 SpectraMatched(SEQUEST MASCOT) 0

\*Des: Caspase 6

SEQUEST:(PepMatched Observed.Hits Coverage) 2 1 8.15%

| Seq        | Charge | Xcor  | Delta | Proability | PepHits |
|------------|--------|-------|-------|------------|---------|
| FFWHLALPER | +3     | 3.305 | 0.331 | 0.9978     | 2       |
| IEIQLTGLFK | +2     | 3.599 | 0.490 | 0.9998     | 3       |

MASCOT:(PepMatched Observed.Hits Coverage)

No. 428. Protein IPI00365216 Matched (SEQUEST MASCOT) Y Y emPAI 0.38 Strategy.Hits 1 PepMatched(SEQUEST MASCOT) 2 SpectraMatched(SEQUEST MASCOT) 4

\*Des: 30 kDa protein

SEQUEST:(PepMatched Observed.Hits Coverage) 2 1 11.61%

| Seq               | Charge | Xcor  | Delta | Proability | PepHits |
|-------------------|--------|-------|-------|------------|---------|
| GPDSALLPSTPGPR    | +2     | 3.104 | 0.391 | 0.9966     | 2       |
| VFNAGDDPSVPLHVLSR | +2     | 5.667 | 0.554 | 1.0000     | 4       |

MASCOT:(PepMatched Observed.Hits Coverage) 2 1 11.61%

| Seq               | Charge | ObservedMS | ExpectedMS | CalculatedMS | Pepscore | PepHits |
|-------------------|--------|------------|------------|--------------|----------|---------|
| GPDSALLPSTPGPR    | +2     | 682.86     | 1363.71    | 1363.71      | 0        | 55      |
| VFNAGDDPSVPLHVLSR | +2     | 911.98     | 1821.95    | 1821.94      | 0.01     | 87      |

No. 429. Protein IPI00365217 Matched (SEQUEST MASCOT) N Y emPAI 0.24 Strategy.Hits 1 PepMatched(SEQUEST MASCOT) 0 SpectraMatched(SEQUEST MASCOT) 5

\*Des: PREDICTED: similar to RIKEN cDNA 0610011D08

SEQUEST:(PepMatched Observed.Hits Coverage) 2 1 11.68%

| Seq           | Charge | ObservedMS | ExpectedMS | CalculatedMS | Pepscore | PepHits |
|---------------|--------|------------|------------|--------------|----------|---------|
| EMDQTMAANAQK  | +2     | 669.3000   | 1336.5854  | 1336.5751    | 0.01     | 75      |
| IVPVEITISLLKR | +2     | 740.9792   | 1479.9439  | 1479.9388    | 0.01     | 49      |

No. 430. Protein IPI00214430 Matched (SEQUEST MASCOT) Y Y emPAI 0.8 Strategy.Hits 3 PepMatched(SEQUEST MASCOT) 7 SpectraMatched(SEQUEST MASCOT) 7

\*Des: CGMP-binding cGMP specific phosphodiesterase

SEQUEST:(PepMatched Observed.Hits Coverage) 7 8 33.19%

| Seq                    | Charge | Xcor  | Delta | Proability | PepHits |
|------------------------|--------|-------|-------|------------|---------|
| DSEGTVSFLSDSGKK        | +2     | 3.405 | 0.362 | 0.9982     | 2       |
| DSEGTVSFLSDSGK         | +2     | 3.950 | 0.508 | 0.9999     | 2       |
| AGPSSVQSQQQR           | +2     | 3.054 | 0.360 | 0.9978     | 1       |
| GIVGHVAAFGEPLNIK       | +2     | 4.299 | 0.536 | 1.0000     | 4       |
| DMVNAWFSEK             | +2     | 3.048 | 0.603 | 1.0000     | 1       |
| DQDWVEAWLDDHR          | +3     | 3.239 | 0.405 | 0.9997     | 2       |
| DQDWVEAWLDDHRDFTFSYFVR | +3     | 4.263 | 0.528 | 1.0000     | 2       |

Identified Human Platelet Proteins

| No.   | Protein                                                | Matched (SEQUEST MASCOT) | emPAI      | Strategy.Hits | PepMatched(SEQUEST MASCOT) | SpectraMatched(SEQUEST MASCOT) |
|-------|--------------------------------------------------------|--------------------------|------------|---------------|----------------------------|--------------------------------|
| 431.  | IPI00209828                                            | Y                        | Y          | 2.29          | 4                          | 9                              |
| *Des: | Myosin regulatory light chain 2, smooth muscle isoform |                          |            |               |                            |                                |
|       | SEQUEST:(PepMatched Observed.Hits Coverage)            | 9                        | 5          | 57.22%        |                            |                                |
|       | Seq                                                    | Charge                   | Xcor       | Delta         | Proability                 | PepHits                        |
|       | LNGTDPEDVIR                                            | +2                       | 3.305      | 0.633         | 0.9980                     | 10                             |
|       | EAFNMIDQNR                                             | +2                       | 2.823      | 0.682         | 0.9979                     | 2                              |
|       | FTDEEVDEMYR                                            | +2                       | 3.472      | 0.797         | 1.0000                     | 1                              |
|       | KGNFNYVEFTR                                            | +2                       | 3.563      | 0.682         | 1.0000                     | 3                              |
|       | EAPIDKKGNFNYVEFTR                                      | +3                       | 3.198      | 0.499         | 0.9954                     | 4                              |
|       | ELLTTMGDRFTDEEVDEMYR                                   | +3                       | 4.798      | 0.744         | 1.0000                     | 2                              |
|       | DGFIDKEDLHDMLASLGK                                     | +2                       | 5.488      | 0.659         | 1.0000                     | 3                              |
|       | ATSNVFMFDQSQIQEFK                                      | +2                       | 5.735      | 0.739         | 1.0000                     | 1                              |
|       | ATSNVFMFDQSQIQEFKEAFNMIDQNR                            | +3                       | 5.730      | 0.749         | 1.0000                     | 3                              |
|       | MASCOT:(PepMatched Observed.Hits Coverage)             | 3                        | 5          | 19.07%        |                            |                                |
|       | Seq                                                    | Charge                   | ObservedMS | ExpectedMS    | CalculatedMS               | Pepscore PepHits               |
|       | LNGTDPEDVIR                                            | +2                       | 615.3099   | 1228.6053     | 1227.6095                  | 1 54 2                         |
|       | ELLTTMGDR                                              | +2                       | 518.2649   | 1034.5152     | 1034.5066                  | 0.01 49 12                     |
|       | EAFNMIDQNR                                             | +2                       | 619.2900   | 1236.5655     | 1236.5557                  | 0.01 60 5                      |
| 432.  | IPI00371634                                            | Y                        | N          | 0.23          | 1                          | 2                              |
| *Des: | B-cell receptor-associated protein 31                  |                          |            |               |                            |                                |
|       | SEQUEST:(PepMatched Observed.Hits Coverage)            | 2                        | 1          | 11.6%         |                            |                                |
|       | Seq                                                    | Charge                   | Xcor       | Delta         | Proability                 | PepHits                        |
|       | GTAEDGGKLDVGSPEMK                                      | +3                       | 3.604      | 0.383         | 0.9989                     | 1                              |
|       | AENEALAMQK                                             | +2                       | 3.991      | 0.416         | 0.9996                     | 2                              |
|       | MASCOT:(PepMatched Observed.Hits Coverage)             |                          |            |               |                            |                                |
| 433.  | IPI00207070                                            | Y                        | Y          | 1.37          | 1                          | 3                              |
| *Des: | GTP-binding protein Rheb                               |                          |            |               |                            |                                |
|       | SEQUEST:(PepMatched Observed.Hits Coverage)            | 3                        | 1          | 33.51%        |                            |                                |
|       | Seq                                                    | Charge                   | Xcor       | Delta         | Proability                 | PepHits                        |
|       | RIILEAEKIDGAASQGK                                      | +2                       | 4.737      | 0.706         | 1.0000                     | 4                              |
|       | LLDMVGKVQIPIMLVGNKK                                    | +3                       | 4.107      | 0.732         | 1.0000                     | 1                              |
|       | VISYEEGKALAESWNAAFLESSAK                               | +3                       | 3.433      | 0.589         | 0.9987                     | 1                              |
|       | MASCOT:(PepMatched Observed.Hits Coverage)             | 3                        | 1          | 26.06%        |                            |                                |
|       | Seq                                                    | Charge                   | ObservedMS | ExpectedMS    | CalculatedMS               | Pepscore PepHits               |
|       | RIILEAEKIDGAASQGK                                      | +2                       | 900.01     | 1798.00       | 1797.99                    | 0.01 68 3                      |

Identified Human Platelet Proteins

|                    |    |        |         |         |   |    |   |  |
|--------------------|----|--------|---------|---------|---|----|---|--|
| ENQTAVDVFR         | +2 | 589.79 | 1177.57 | 1177.57 | 0 | 41 | 2 |  |
| LLDMVGKVIPIMLVGNKK | +3 | 699.42 | 2095.23 | 2095.23 | 0 | 48 | 1 |  |

No. 434. Protein IPI00207217 Matched (SEQUEST MASCOT) Y Y emPAI Strategy.Hits 0.72 1 PepMatched(SEQUEST MASCOT) 2 4 SpectraMatched(SEQUEST MASCOT) 10 6

\*Des: Enoyl-CoA hydratase, mitochondrial precursor

|                                             |            |              |         |         |      |    |          |         |
|---------------------------------------------|------------|--------------|---------|---------|------|----|----------|---------|
| SEQUEST:(PepMatched Observed.Hits Coverage) | 2          | 1            | 12.2%   |         |      |    |          |         |
| Seq Charge Xcor Delta                       | Probility  | PepHits      |         |         |      |    |          |         |
| NSSVGLIQLNRPK                               | +2         | 3.032        | 0.392   | 0.9989  | 3    |    |          |         |
| AQFGQPEILLGTIPGAGGTQR                       | +2         | 5.620        | 0.551   | 1.0000  | 10   |    |          |         |
| MASCOT:(PepMatched Observed.Hits Coverage)  | 4          | 1            | 20%     |         |      |    |          |         |
| Seq Charge ObservedMS                       | ExpectedMS | CalculatedMS |         |         |      |    | Pepscore | PepHits |
| EGMSAFVEK                                   | +2         | 499.24       | 996.46  | 996.46  | 0    | 45 | 3        |         |
| NSSVGLIQLNRPK                               | +2         | 713.42       | 1424.82 | 1424.81 | 0.01 | 54 | 3        |         |
| SLAMEMVLTGDR                                | +2         | 661.83       | 1321.65 | 1321.64 | 0.01 | 51 | 2        |         |
| AQFGQPEILLGTIPGAGGTQR                       | +3         | 704.38       | 2110.13 | 2110.12 | 0.01 | 52 | 7        |         |

No. 435. Protein IPI00214434 Matched (SEQUEST MASCOT) N Y emPAI Strategy.Hits 0.67 2 PepMatched(SEQUEST MASCOT) 0 4 SpectraMatched(SEQUEST MASCOT) 0 16

\*Des: Ras-related protein Rab-11A

|                                             |            |              |           |           |      |    |          |         |
|---------------------------------------------|------------|--------------|-----------|-----------|------|----|----------|---------|
| SEQUEST:(PepMatched Observed.Hits Coverage) | 4          | 2            | 22.27%    |           |      |    |          |         |
| MASCOT:(PepMatched Observed.Hits Coverage)  | 4          | 2            | 22.27%    |           |      |    |          |         |
| Seq Charge ObservedMS                       | ExpectedMS | CalculatedMS |           |           |      |    | Pepscore | PepHits |
| VVLIGDSGVGK                                 | +2         | 522.3424     | 1042.6702 | 1042.6022 | 0.07 | 53 | 1        |         |
| STIGVEFATR                                  | +2         | 540.8239     | 1079.6332 | 1079.5611 | 0.07 | 56 | 3        |         |
| AQIWDTAGQER                                 | +2         | 637.8571     | 1273.6996 | 1273.6051 | 0.09 | 44 | 2        |         |
| GAVGALLVYDIAK                               | +2         | 645.4185     | 1288.8224 | 1288.7390 | 0.08 | 43 | 3        |         |

No. 436. Protein IPI00207146 Matched (SEQUEST MASCOT) Y N emPAI Strategy.Hits 0.34 2 PepMatched(SEQUEST MASCOT) 4 0 SpectraMatched(SEQUEST MASCOT) 17 0

\*Des: Zero beta-1 globin

|                                             |           |         |       |        |    |  |  |  |
|---------------------------------------------|-----------|---------|-------|--------|----|--|--|--|
| SEQUEST:(PepMatched Observed.Hits Coverage) | 4         | 2       | 22%   |        |    |  |  |  |
| MASCOT:(PepMatched Observed.Hits Coverage)  | 4         | 2       | 22%   |        |    |  |  |  |
| Seq Charge Xcor Delta                       | Probility | PepHits |       |        |    |  |  |  |
| FGDLSSVSAIMGNPQVK                           | +2        | 3.059   | 0.485 | 0.9992 | 1  |  |  |  |
| VVAGVASALAHK                                | +2        | 3.758   | 0.538 | 1.0000 | 7  |  |  |  |
| VVAGVASALAHKY                               | +2        | 3.709   | 0.573 | 1.0000 | 12 |  |  |  |
| VVAGVASALAHKYH                              | +2        | 3.868   | 0.565 | 1.0000 | 16 |  |  |  |

No. 437. Protein IPI00363619 Matched (SEQUEST MASCOT) N Y emPAI Strategy.Hits 0.55 1 PepMatched(SEQUEST MASCOT) 0 2 SpectraMatched(SEQUEST MASCOT) 0 3

\*Des: PREDICTED: similar to clathrin-associated protein 19 - mouse

|                                             |            |              |         |         |      |    |          |         |
|---------------------------------------------|------------|--------------|---------|---------|------|----|----------|---------|
| SEQUEST:(PepMatched Observed.Hits Coverage) | 2          | 1            | 16.77%  |         |      |    |          |         |
| MASCOT:(PepMatched Observed.Hits Coverage)  | 2          | 1            | 16.77%  |         |      |    |          |         |
| Seq Charge ObservedMS                       | ExpectedMS | CalculatedMS |         |         |      |    | Pepscore | PepHits |
| AIEQADLLQEEDESPR                            | +2         | 921.95       | 1841.86 | 1841.86 | 0.02 | 93 | 1        |         |
| ELMQVVLAR                                   | +2         | 529.81       | 1057.60 | 1057.60 | 0    | 49 | 3        |         |

Identified Human Platelet Proteins

| No.   | Protein                                                     | Matched (SEQUEST MASCOT) | emPAI      | Strategy.Hits | PepMatched(SEQUEST MASCOT) | SpectraMatched(SEQUEST MASCOT) |
|-------|-------------------------------------------------------------|--------------------------|------------|---------------|----------------------------|--------------------------------|
| 438.  | IPI00363547                                                 | Y Y                      | 0.15       | 3             | 5 4 6                      | 6                              |
| *Des: | PREDICTED: similar to Formin homology 2 domain containing 1 |                          |            |               |                            |                                |
|       | SEQUEST:(PepMatched Observed.Hits Coverage)                 |                          | 5          | 3             | 6.05%                      |                                |
|       | Seq                                                         | Charge                   | Xcor       | Delta         | Probility                  | PepHits                        |
|       | GDGDPVSVVTVR                                                | +2                       | 3.082      | 0.329         | 0.9953                     | 1                              |
|       | FLENVAAAETEK                                                | +2                       | 3.752      | 0.370         | 0.9992                     | 2                              |
|       | TQLTLYESALR                                                 | +2                       | 2.713      | 0.384         | 0.9665                     | 1                              |
|       | AALLNFDEFVSK                                                | +2                       | 4.095      | 0.591         | 1.0000                     | 2                              |
|       | SGLGDDLVLQALGLSK                                            | +2                       | 4.321      | 0.548         | 1.0000                     | 1                              |
|       | MASCOT:(PepMatched Observed.Hits Coverage)                  |                          | 4          | 4             | 4.54%                      |                                |
|       | Seq                                                         | Charge                   | ObservedMS | ExpectedMS    | CalculatedMS               | Pepscore PepHits               |
|       | FLENVAAAETEK                                                | +2                       | 661.34     | 1320.66       | 1320.66                    | 0 78 2                         |
|       | LQLWAFK                                                     | +2                       | 453.27     | 904.52        | 904.52                     | 0 49 1                         |
|       | AALLNFDEFVSK                                                | +2                       | 712.88     | 1423.75       | 1423.73                    | 0.02 71 2                      |
|       | SGLGDDLVLQALGLSK                                            | +2                       | 736.91     | 1471.80       | 1471.79                    | 0.01 110 1                     |

| No.   | Protein                                     | Matched (SEQUEST MASCOT) | emPAI      | Strategy.Hits | PepMatched(SEQUEST MASCOT) | SpectraMatched(SEQUEST MASCOT) |
|-------|---------------------------------------------|--------------------------|------------|---------------|----------------------------|--------------------------------|
| 439.  | IPI00607179                                 | N Y                      | 3.5        | 2             | 0 3 0                      | 36                             |
| *Des: | Platelet glycoprotein Ib beta               |                          |            |               |                            |                                |
|       | SEQUEST:(PepMatched Observed.Hits Coverage) |                          | 3          | 2             | 11.42%                     |                                |
|       | MASCOT:(PepMatched Observed.Hits Coverage)  |                          | 3          | 2             | 11.42%                     |                                |
|       | Seq                                         | Charge                   | ObservedMS | ExpectedMS    | CalculatedMS               | Pepscore PepHits               |
|       | VHLGANPWR                                   | +2                       | 525.3197   | 1048.6248     | 1048.5566                  | 0.07 42 8                      |
|       | LLPYVAEDELRL                                | +2                       | 659.4041   | 1316.7936     | 1316.6976                  | 0.1 52 52                      |
|       | GRLLPYVAEDELRL                              | +2                       | 765.9707   | 1529.9268     | 1529.8201                  | 0.11 61 6                      |

| No.   | Protein                                     | Matched (SEQUEST MASCOT) | emPAI      | Strategy.Hits | PepMatched(SEQUEST MASCOT) | SpectraMatched(SEQUEST MASCOT) |
|-------|---------------------------------------------|--------------------------|------------|---------------|----------------------------|--------------------------------|
| 440.  | IPI00361871                                 | Y Y                      | 0.13       | 1             | 2 3 2                      | 6                              |
| *Des: | PREDICTED: similar to Smoothelin            |                          |            |               |                            |                                |
|       | SEQUEST:(PepMatched Observed.Hits Coverage) |                          | 2          | 1             | 2.6%                       |                                |
|       | Seq                                         | Charge                   | Xcor       | Delta         | Probility                  | PepHits                        |
|       | SNMATTETTTR                                 | +2                       | 3.527      | 0.398         | 0.9994                     | 3                              |
|       | LVHSNDGTQTAR                                | +2                       | 3.159      | 0.573         | 1.0000                     | 1                              |
|       | MASCOT:(PepMatched Observed.Hits Coverage)  |                          | 3          | 1             | 3.53%                      |                                |
|       | Seq                                         | Charge                   | ObservedMS | ExpectedMS    | CalculatedMS               | Pepscore PepHits               |
|       | SNMATTETTTR                                 | +2                       | 606.7838   | 1211.5530     | 1211.5452                  | 0.01 53 3                      |
|       | SLSVLSPR                                    | +2                       | 429.7426   | 857.4706      | 857.4970                   | -0.02 42 1                     |
|       | LVHSNDGTQTAR                                | +2                       | 649.8323   | 1297.6501     | 1297.6375                  | 0.01 51 2                      |

| No.   | Protein                                     | Matched (SEQUEST MASCOT) | emPAI      | Strategy.Hits | PepMatched(SEQUEST MASCOT) | SpectraMatched(SEQUEST MASCOT) |
|-------|---------------------------------------------|--------------------------|------------|---------------|----------------------------|--------------------------------|
| 441.  | IPI00389750                                 | N Y                      | 0.26       | 1             | 0 7 0                      | 23                             |
| *Des: | Splice Isoform IIBA of Dynamin-2            |                          |            |               |                            |                                |
|       | SEQUEST:(PepMatched Observed.Hits Coverage) |                          | 7          | 1             | 10.43%                     |                                |
|       | MASCOT:(PepMatched Observed.Hits Coverage)  |                          | 7          | 1             | 10.43%                     |                                |
|       | Seq                                         | Charge                   | ObservedMS | ExpectedMS    | CalculatedMS               | Pepscore PepHits               |

Identified Human Platelet Proteins

|                    |    |        |         |         |      |    |    |
|--------------------|----|--------|---------|---------|------|----|----|
| TIMHLMINNTK        | +2 | 658.35 | 1314.68 | 1314.68 | 0    | 44 | 2  |
| VPVGDQPPDIEYQIK    | +2 | 849.44 | 1696.87 | 1696.87 | 0    | 67 | 4  |
| IEGSGDQVDTLELSGGAR | +2 | 902.45 | 1802.88 | 1802.86 | 0.02 | 83 | 1  |
| FFLSHPAYR          | +2 | 569.30 | 1136.58 | 1136.58 | 0    | 42 | 8  |
| LDLMDEGTDAR        | +2 | 618.28 | 1234.55 | 1234.55 | 0    | 53 | 12 |
| GWLTINNISLMK       | +2 | 695.38 | 1388.75 | 1388.75 | 0    | 49 | 3  |
| DMILQFISR          | +2 | 561.80 | 1121.59 | 1121.59 | 0    | 49 | 8  |

No. 442. Protein IPI00200601 Matched (SEQUEST MASCOT) N Y emPAI Strategy.Hits 0.3 1 PepMatched(SEQUEST MASCOT) 0 SpectraMatched(SEQUEST MASCOT) 2 0 3

\*Des:

Thioredoxin-related protein

SEQUEST:(PepMatched Observed.Hits Coverage)

MASCOT:(PepMatched Observed.Hits Coverage)

|                        |        |            |            |              |          |         |
|------------------------|--------|------------|------------|--------------|----------|---------|
| Seq                    | Charge | ObservedMS | ExpectedMS | CalculatedMS | PepScore | PepHits |
| IDQYQGADAVGLEEK        | +2     | 818.40     | 1634.79    | 1634.78      | 0.01     | 81      |
| VGVKPVGSDPDFQPELSGAGSR | +3     | 733.71     | 2198.10    | 2198.10      | 0        | 53 1    |

No. 443. Protein IPI00210224 Matched (SEQUEST MASCOT) Y Y emPAI Strategy.Hits 0.14 4 PepMatched(SEQUEST MASCOT) 18 SpectraMatched(SEQUEST MASCOT) 23 64 90

\*Des:

PREDICTED: von Willebrand factor

SEQUEST:(PepMatched Observed.Hits Coverage)

|                                 |        |       |       |            |         |  |  |
|---------------------------------|--------|-------|-------|------------|---------|--|--|
| Seq                             | Charge | Xcor  | Delta | Proability | PepHits |  |  |
| ILVNEGCTYPSVK                   | +2     | 3.951 | 0.508 | 1.0000     | 4       |  |  |
| YVGSQLASTSEVLK                  | +2     | 3.966 | 0.561 | 1.0000     | 5       |  |  |
| LSEAEFEVLK                      | +2     | 3.661 | 0.412 | 0.9997     | 5       |  |  |
| AFLLSGVDELEQR                   | +2     | 4.587 | 0.520 | 1.0000     | 5       |  |  |
| VEDAVFVQQR                      | +2     | 3.043 | 0.430 | 0.9992     | 1       |  |  |
| LSYGEDLQMEWDGR                  | +2     | 3.460 | 0.399 | 0.9988     | 1       |  |  |
| LLDLVFLLDGSYR                   | +2     | 4.071 | 0.494 | 1.0000     | 5       |  |  |
| VAVFPIGVGDRYDEAQLR              | +3     | 2.582 | 0.502 | 0.9999     | 2       |  |  |
| LVCPADNPR                       | +2     | 2.619 | 0.451 | 0.9988     | 5       |  |  |
| HAGLSVELR                       | +2     | 2.975 | 0.443 | 0.9994     | 6       |  |  |
| HIVTFDGQNFK                     | +2     | 3.397 | 0.483 | 0.9998     | 4       |  |  |
| VILLTASQEPQR                    | +3     | 3.458 | 0.465 | 1.0000     | 8       |  |  |
| ILAGPGASSNVVK                   | +2     | 3.948 | 0.527 | 1.0000     | 24      |  |  |
| ANIGPHLTQVSVIQYGSINTIDVPWNVAQEK | +3     | 5.927 | 0.639 | 1.0000     | 5       |  |  |
| LQQVEDLLTMVTPGNSFFHR            | +2     | 4.700 | 0.531 | 1.0000     | 5       |  |  |
| LSALHNSLMK                      | +2     | 3.304 | 0.423 | 0.9995     | 7       |  |  |
| YVTSQIHGARGASK                  | +2     | 4.255 | 0.573 | 1.0000     | 14      |  |  |
| KLSLDVSLAACHNNIMK               | +3     | 3.680 | 0.450 | 1.0000     | 2       |  |  |

MASCOT:(PepMatched Observed.Hits Coverage)

|            |        |            |            |              |          |         |
|------------|--------|------------|------------|--------------|----------|---------|
| Seq        | Charge | ObservedMS | ExpectedMS | CalculatedMS | PepScore | PepHits |
| VSPQCADTR  | +2     | 488.7328   | 975.4510   | 975.4444     | 0.01     | 52 6    |
| QTMVDSSCR  | +2     | 513.7238   | 1025.4331  | 1025.4270    | 0.01     | 54 8    |
| DGTVTTDWKR | +2     | 589.7975   | 1177.5804  | 1177.5727    | 0.01     | 55 6    |
| ANLQELER   | +2     | 486.7618   | 971.5090   | 971.5036     | 0.01     | 48 3    |
| VEDAVFVQQR | +2     | 595.8202   | 1189.6258  | 1189.6091    | 0.02     | 52 2    |



Identified Human Platelet Proteins

|                                 |    |           |           |           |           |           |      |    |   |
|---------------------------------|----|-----------|-----------|-----------|-----------|-----------|------|----|---|
| LSEAEFEVLK                      | +2 | 582.8140  | 1163.6135 | 1163.6073 | 0.01      | 71        | 6    |    |   |
| LSYGEDLQMEWDGR                  |    | +2        | 849.8787  | 1697.7428 | 1697.7355 | 0.01      | 49   | 2  |   |
| AFLLSGVDELEQR                   | +2 | 738.8941  | 1475.7737 | 1475.7619 | 0.01      | 85        | 8    |    |   |
| LVCPADNPR                       | +2 | 492.7535  | 983.4925  | 983.4858  | 0.01      | 44        | 3    |    |   |
| AFVVGTMER                       | +2 | 505.2633  | 1008.5120 | 1008.5062 | 0.01      | 45        | 1    |    |   |
| ILVGNEGCTYPSVK                  | +2 | 740.3849  | 1478.7553 | 1478.7439 | 0.01      | 88        | 4    |    |   |
| YVGSQLASTSEVLK                  | +2 | 741.4030  | 1480.7914 | 1480.7773 | 0.01      | 89        | 3    |    |   |
| LLDLVFLLDGSYR                   | +2 | 762.4340  | 1522.8534 | 1522.8395 | 0.01      | 74        | 5    |    |   |
| HIVTFDQNFK                      | +2 | 653.3375  | 1304.6605 | 1304.6513 | 0.01      | 50        | 3    |    |   |
| VILLTASQEPQR                    | +2 | 734.4352  | 1466.8558 | 1466.8456 | 0.01      | 82        | 7    |    |   |
| HAGLSVELR                       | +2 | 491.2803  | 980.5461  | 980.5403  | 0.01      | 67        | 7    |    |   |
| ANIGPHLTQVSVIQYGSINTIDVPWNVAQEK |    |           | +3        | 1131.2720 | 3390.7941 | 3390.7571 | 0.04 | 99 | 5 |
| LQQVEDLLTMVTPGNSFFHR            | +2 | 1166.5995 | 2331.1844 | 2331.1681 | 0.02      | 121       | 5    |    |   |
| IQHTVMASVR                      | +2 | 571.3148  | 1140.6151 | 1140.6073 | 0.01      | 51        | 1    |    |   |
| ILAGPGASSNVVK                   | +2 | 606.8542  | 1211.6938 | 1211.6873 | 0.01      | 86        | 20   |    |   |
| LSALHNSLMK                      | +2 | 557.3112  | 1112.6079 | 1112.6012 | 0.01      | 60        | 4    |    |   |
| LHISQKR                         | +2 | 441.2723  | 880.5301  | 880.5243  | 0.01      | 41        | 3    |    |   |
| YVTSQIHGARPQASK                 | +2 | 786.4245  | 1570.8344 | 1570.8215 | 0.01      | 80        | 13   |    |   |

No. 444. IPI00211891 Protein Matched (SEQUEST MASCOT) emPAI Strategy.Hits PepMatched(SEQUEST MASCOT) SpectraMatched(SEQUEST MASCOT)  
 \*Des: PREDICTED: similar to SH2/SH3 adaptor protein  
 SEQUEST:(PepMatched Observed.Hits Coverage) 2 1 10.33%  
 Seq Charge Xcor Delta Probility PepHits  
 FAYVAEREDELSLVK +3 2.857 0.443 0.9921 3  
 VLHVVTLYPFSSVTEEELSFEK +3 4.504 0.529 1.0000 2  
 MASCOT:(PepMatched Observed.Hits Coverage)

No. 445. IPI00388015 Protein Matched (SEQUEST MASCOT) emPAI Strategy.Hits PepMatched(SEQUEST MASCOT) SpectraMatched(SEQUEST MASCOT)  
 \*Des: PREDICTED: similar to Coronin, actin binding protein 1C  
 SEQUEST:(PepMatched Observed.Hits Coverage) 3 3 9.76%  
 Seq Charge Xcor Delta Probility PepHits  
 ISKLEQQLAK +2 3.428 0.315 0.9966 9  
 KSDLFQDDLYPDTAGPEAALEAEWFEGK +3 5.997 0.519 1.0000 2  
 FVAIIIIEASGGGAFLVPLHK +3 3.957 0.454 1.0000 1  
 MASCOT:(PepMatched Observed.Hits Coverage) 3 3 9.76%  
 Seq Charge ObservedMS ExpectedMS CalculatedMS Pepscore PepHits  
 ISKLEQQLAK +2 579.3560 1156.6974 1156.6815 0.02 50 7  
 FVAIIIIEASGGGAFLVPLHK +3 718.1025 2151.2856 2151.2455 0.04 52 1  
 KSDLFQDDLYPDTAGPEAALEAEWFEGK +3 1091.1924 3270.5553 3270.4880 0.07 76 2

No. 446. IPI00204748 Protein Matched (SEQUEST MASCOT) emPAI Strategy.Hits PepMatched(SEQUEST MASCOT) SpectraMatched(SEQUEST MASCOT)  
 \*Des: S100 calcium-binding protein A4  
 SEQUEST:(PepMatched Observed.Hits Coverage)  
 MASCOT:(PepMatched Observed.Hits Coverage) 3 1 22.33%

| Identified Human Platelet Proteins |                                                           |                            |            |                 |                                |                                    |    |     |          |         |
|------------------------------------|-----------------------------------------------------------|----------------------------|------------|-----------------|--------------------------------|------------------------------------|----|-----|----------|---------|
| Seq                                | Charge                                                    | ObservedMS                 | ExpectedMS | CalculatedMS    |                                |                                    |    |     | PepScore | PepHits |
| LNKTELK                            | +2                                                        | 423.2609                   | 844.5072   | 844.5018        | 0.01                           | 42                                 | 2  |     |          |         |
| RTDEAAFQK                          | +2                                                        | 533.2725                   | 1064.5304  | 1064.5250       | 0.01                           | 41                                 | 1  |     |          |         |
| LNKTELKELLTR                       | +2                                                        | 729.4365                   | 1456.8584  | 1456.8613       | 0                              | 52                                 | 6  |     |          |         |
| No. 447.                           | Protein IPI00212767                                       | Matched (SEQUEST MASCOT) N | emPAI 2.42 | Strategy.Hits 1 | PepMatched (SEQUEST MASCOT) 0  | SpectraMatched (SEQUEST MASCOT) 2  | 0  | 4   |          |         |
| *Des:                              | Anionic trypsin I precursor                               |                            |            |                 |                                |                                    |    |     |          |         |
|                                    | SEQUEST:(PepMatched Observed.Hits Coverage)               |                            |            |                 |                                |                                    |    |     |          |         |
|                                    | MASCOT:(PepMatched Observed.Hits Coverage) 2 2 9.96%      |                            |            |                 |                                |                                    |    |     |          |         |
|                                    | Seq                                                       | Charge                     | ObservedMS | ExpectedMS      | CalculatedMS                   |                                    |    |     | PepScore | PepHits |
|                                    | LGEHNINVLGDEQFINAAK                                       | +3                         | 737.71     | 2210.11         | 2210.10                        | 0.01                               | 74 | 4   |          |         |
|                                    | IQVRLGEHNINVLGDEQFINAAK                                   | +3                         | 903.52     | 2707.55         | 2706.41                        | 1.14                               | 43 | 1   |          |         |
| No. 448.                           | Protein IPI00201333                                       | Matched (SEQUEST MASCOT) Y | emPAI 0.13 | Strategy.Hits 2 | PepMatched (SEQUEST MASCOT) 3  | SpectraMatched (SEQUEST MASCOT) 2  | 3  | 4   |          |         |
| *Des:                              | PREDICTED: similar to alpha glucosidase II, alpha subunit |                            |            |                 |                                |                                    |    |     |          |         |
|                                    | SEQUEST:(PepMatched Observed.Hits Coverage) 3 2 4.67%     |                            |            |                 |                                |                                    |    |     |          |         |
|                                    | Seq                                                       | Charge                     | Xcor       | Delta           | Proability                     | PepHits                            |    |     |          |         |
|                                    | KPGVNVASDWSIHL                                            | +3                         | 4.050      | 0.525           | 1.0000                         | 1                                  |    |     |          |         |
|                                    | LSFQHDPETSVLTLR                                           | +3                         | 4.228      | 0.412           | 0.9999                         | 1                                  |    |     |          |         |
|                                    | FPQPLNMLEHLASK                                            | +3                         | 4.342      | 0.277           | 0.9992                         | 1                                  |    |     |          |         |
|                                    | MASCOT:(PepMatched Observed.Hits Coverage) 2 2 3.15%      |                            |            |                 |                                |                                    |    |     |          |         |
|                                    | Seq                                                       | Charge                     | ObservedMS | ExpectedMS      | CalculatedMS                   |                                    |    |     | PepScore | PepHits |
|                                    | VLLVLELQGLQK                                              | +2                         | 676.9344   | 1351.8542       | 1351.8438                      | 0.01                               | 50 | 2   |          |         |
|                                    | VVIMGAGKPAAVVLQTK                                         | +2                         | 841.5132   | 1681.0119       | 1680.9960                      | 0.02                               | 80 | 2   |          |         |
| No. 449.                           | Protein IPI00201262                                       | Matched (SEQUEST MASCOT) Y | emPAI 0.24 | Strategy.Hits 3 | PepMatched (SEQUEST MASCOT) 18 | SpectraMatched (SEQUEST MASCOT) 14 | 29 | 100 |          |         |
| *Des:                              | Alpha-1-inhibitor III precursor                           |                            |            |                 |                                |                                    |    |     |          |         |
|                                    | SEQUEST:(PepMatched Observed.Hits Coverage) 18 5 20.7%    |                            |            |                 |                                |                                    |    |     |          |         |
|                                    | Seq                                                       | Charge                     | Xcor       | Delta           | Proability                     | PepHits                            |    |     |          |         |
|                                    | PASNMVIADVK                                               | +2                         | 3.475      | 0.500           | 0.9990                         | 2                                  |    |     |          |         |
|                                    | ESVVFVQTDKPMYKPGQSVK                                      | +3                         | 3.800      | 0.484           | 1.0000                         | 3                                  |    |     |          |         |
|                                    | VHLSFSPSQSLPASQTHMR                                       | +3                         | 3.534      | 0.458           | 0.9999                         | 3                                  |    |     |          |         |
|                                    | LPSSEEEESLDINIEGAK                                        | +2                         | 6.672      | 0.607           | 1.0000                         | 2                                  |    |     |          |         |
|                                    | KLFDELVVVK                                                | +2                         | 2.840      | 0.242           | 0.9731                         | 2                                  |    |     |          |         |
|                                    | GMYESLPVVAVK                                              | +2                         | 2.944      | 0.335           | 0.9943                         | 2                                  |    |     |          |         |
|                                    | MLSGFIPLKPTVK                                             | +2                         | 3.504      | 0.335           | 0.9969                         | 1                                  |    |     |          |         |
|                                    | FSIDTNGISDYSLSNIK                                         | +2                         | 5.202      | 0.345           | 0.9997                         | 2                                  |    |     |          |         |
|                                    | YMLVPSQLYTETPEK                                           | +2                         | 4.601      | 0.642           | 1.0000                         | 1                                  |    |     |          |         |
|                                    | QQNSYGGFSSTQDTVVALDALS                                    | +2                         | 4.686      | 0.659           | 1.0000                         | 1                                  |    |     |          |         |
|                                    | LTAQPAPSPEDLALSMGTIK                                      | +2                         | 4.255      | 0.565           | 1.0000                         | 3                                  |    |     |          |         |
|                                    | MLIYTILPDGEVIADSVK                                        | +2                         | 5.131      | 0.489           | 1.0000                         | 3                                  |    |     |          |         |
|                                    | AHFSVMGDILSSAIK                                           | +2                         | 4.305      | 0.563           | 1.0000                         | 2                                  |    |     |          |         |
|                                    | EEHSFTVMEFVLPR                                            | +2                         | 4.099      | 0.574           | 1.0000                         | 4                                  |    |     |          |         |
|                                    | NLHPLNELFPLAYIEDPK                                        | +2                         | 4.912      | 0.610           | 1.0000                         | 2                                  |    |     |          |         |

| Identified Human Platelet Proteins |                                     |        |            |            |              |      |     |  |          |         |
|------------------------------------|-------------------------------------|--------|------------|------------|--------------|------|-----|--|----------|---------|
|                                    | AFIFIDESHITDAFTWLSK                 | +2     | 4.880      | 0.607      | 1.0000       | 2    |     |  |          |         |
|                                    | TPSVTVQSSGSFSQK                     | +2     | 4.380      | 0.504      | 0.9999       | 1    |     |  |          |         |
|                                    | HAEAHTAYAVYSLSK                     | +3     | 3.996      | 0.565      | 1.0000       | 1    |     |  |          |         |
| MASCOT:                            | (PepMatched Observed.Hits Coverage) |        | 14         | 4          | 15.37%       |      |     |  |          |         |
|                                    | Seq                                 | Charge | ObservedMS | ExpectedMS | CalculatedMS |      |     |  | PepScore | PepHits |
|                                    | TPSVTVQSSGSFSQK                     | +2     | 770.39     | 1538.77    | 1538.76      | 0.01 | 80  |  | 4        |         |
|                                    | GMYESLPVAVK                         | +2     | 646.85     | 1291.69    | 1291.68      | 0.01 | 43  |  | 2        |         |
|                                    | VHLSFSPSQSLPASQTHMR                 | +3     | 704.03     | 2109.06    | 2109.04      | 0.02 | 45  |  | 5        |         |
|                                    | ESVVFVQTDKPMYKPGQSVK                | +3     | 756.40     | 2266.18    | 2266.17      | 0.01 | 46  |  | 4        |         |
|                                    | LPSSEEEESLDINIEGAK                  | +2     | 980.48     | 1958.95    | 1958.93      | 0.02 | 112 |  | 6        |         |
|                                    | FSIDTNGISDYSLNLIK                   | +2     | 893.95     | 1785.89    | 1785.88      | 0.01 | 111 |  | 2        |         |
|                                    | LTAQPAPSPEDLALSMGTIK                | +3     | 680.70     | 2039.07    | 2039.06      | 0.01 | 45  |  | 5        |         |
|                                    | YMLVPSQLYTETPEK                     | +2     | 949.48     | 1896.95    | 1896.95      | 0    | 86  |  | 9        |         |
|                                    | MLSGFIPLKPTVK                       | +2     | 715.93     | 1429.84    | 1429.84      | 0    | 44  |  | 7        |         |
|                                    | AHFSVMGDILSSAIK                     | +2     | 788.42     | 1574.82    | 1574.81      | 0.01 | 85  |  | 18       |         |
|                                    | EEHSFTVMEFVLPR                      | +2     | 860.93     | 1719.84    | 1719.83      | 0.01 | 71  |  | 32       |         |
|                                    | MLIYTILPDGEVIADSVK                  | +2     | 989.04     | 1976.06    | 1976.05      | 0.01 | 82  |  | 24       |         |
|                                    | ETGLMAFTNLK                         | +2     | 612.82     | 1223.62    | 1223.62      | 0    | 44  |  | 1        |         |
|                                    | KLFDELVVDK                          | +2     | 603.34     | 1204.67    | 1204.67      | 0    | 68  |  | 6        |         |

| No.   | Protein                                   | Matched (SEQUEST MASCOT)            | emPAI      | Strategy.Hits | PepMatched(SEQUEST MASCOT) | SpectraMatched(SEQUEST MASCOT) |
|-------|-------------------------------------------|-------------------------------------|------------|---------------|----------------------------|--------------------------------|
| 450.  | IPI00202139                               | Y Y                                 | 0.41       | 1             | 3 3 5 6                    |                                |
| *Des: | Copper chaperone for superoxide dismutase |                                     |            |               |                            |                                |
|       | SEQUEST:                                  | (PepMatched Observed.Hits Coverage) | 3          | 1             | 17.56%                     |                                |
|       | Seq                                       | Charge                              | Xcor       | Delta         | Probility                  | PepHits                        |
|       | SLVVDEGEDDLGR                             | +2                                  | 4.026      | 0.589         | 1.0000                     | 4                              |
|       | NLGAAVAIMEGSGTVQGVVR                      | +2                                  | 4.066      | 0.517         | 0.9998                     | 2                              |
|       | GDLGNVHAEASGR                             | +2                                  | 3.429      | 0.580         | 0.9999                     | 2                              |
|       | MASCOT:                                   | (PepMatched Observed.Hits Coverage) | 3          | 1             | 17.56%                     |                                |
|       | Seq                                       | Charge                              | ObservedMS | ExpectedMS    | CalculatedMS               | PepScore                       |
|       | GDLGNVHAEASGR                             | +2                                  | 641.81     | 1281.61       | 1281.61                    | 0 71 1                         |
|       | SLVVDEGEDDLGR                             | +2                                  | 702.34     | 1402.66       | 1402.66                    | 0 74 4                         |
|       | NLGAAVAIMEGSGTVQGVVR                      | +2                                  | 965.02     | 1928.02       | 1928.01                    | 0.01 78 2                      |

| No.   | Protein                            | Matched (SEQUEST MASCOT)            | emPAI | Strategy.Hits | PepMatched(SEQUEST MASCOT) | SpectraMatched(SEQUEST MASCOT) |
|-------|------------------------------------|-------------------------------------|-------|---------------|----------------------------|--------------------------------|
| 451.  | IPI00210158                        | Y N                                 | 0.3   | 1             | 3 0 6 0                    |                                |
| *Des: | 26S protease regulatory subunit 6B |                                     |       |               |                            |                                |
|       | SEQUEST:                           | (PepMatched Observed.Hits Coverage) | 3     | 1             | 14.11%                     |                                |
|       | Seq                                | Charge                              | Xcor  | Delta         | Probility                  | PepHits                        |
|       | LQQUELEFLEVQEEYIKDEQK              | +3                                  | 3.933 | 0.394         | 0.9929                     | 1                              |
|       | ILLELLNQMDGFDQNVNVK                | +2                                  | 5.711 | 0.687         | 1.0000                     | 1                              |
|       | ENAPAIIFIDEIDAIATK                 | +2                                  | 4.875 | 0.354         | 0.9998                     | 4                              |
|       | MASCOT:                            | (PepMatched Observed.Hits Coverage) |       |               |                            |                                |

| No.   | Protein                                         | Matched (SEQUEST MASCOT) | emPAI | Strategy.Hits | PepMatched(SEQUEST MASCOT) | SpectraMatched(SEQUEST MASCOT) |
|-------|-------------------------------------------------|--------------------------|-------|---------------|----------------------------|--------------------------------|
| 452.  | IPI00476086                                     | Y Y                      | 0.93  | 1             | 4 4 9 20                   |                                |
| *Des: | ATPase, H+ transporting, V0 subunit D isoform 1 |                          |       |               |                            |                                |

**Identified Human Platelet Proteins**

|              |                                                                       |                                 |              |                      |                                   |                                       |     |    |  |
|--------------|-----------------------------------------------------------------------|---------------------------------|--------------|----------------------|-----------------------------------|---------------------------------------|-----|----|--|
|              | <b>SEQUEST:(PepMatched Observed.Hits Coverage)</b>                    | <b>4</b>                        | <b>1</b>     | <b>19.32%</b>        |                                   |                                       |     |    |  |
|              | <b>Seq Charge Xcor Delta Probility PepHits</b>                        |                                 |              |                      |                                   |                                       |     |    |  |
|              | NVADYYPEYK                                                            | +2                              | 2.878        | 0.404                | 0.9988                            | 3                                     |     |    |  |
|              | LLFEGAGSNPGDK                                                         | +2                              | 3.933        | 0.383                | 0.9995                            | 2                                     |     |    |  |
|              | LHLQSTDYGNFLANEASPLTVSVIDDK                                           | +3                              | 6.030        | 0.465                | 1.0000                            | 1                                     |     |    |  |
|              | AFIITINSFGTELSK                                                       | +2                              | 4.866        | 0.499                | 1.0000                            | 5                                     |     |    |  |
|              | <b>MASCOT:(PepMatched Observed.Hits Coverage)</b>                     | <b>4</b>                        | <b>1</b>     | <b>19.32%</b>        |                                   |                                       |     |    |  |
|              | <b>Seq Charge ObservedMS ExpectedMS CalculatedMS Pepscore PepHits</b> |                                 |              |                      |                                   |                                       |     |    |  |
|              | NVADYYPEYK                                                            | +2                              | 631.29       | 1260.58              | 1260.57                           | 0.01                                  | 50  | 6  |  |
|              | LLFEGAGSNPGDK                                                         | +2                              | 652.83       | 1303.65              | 1303.64                           | 0.01                                  | 87  | 4  |  |
|              | LHLQSTDYGNFLANEASPLTVSVIDDK                                           | +3                              | 983.17       | 2946.49              | 2946.46                           | 0.03                                  | 79  | 2  |  |
|              | AFIITINSFGTELSK                                                       | +2                              | 820.96       | 1639.90              | 1639.88                           | 0.02                                  | 113 | 10 |  |
| <b>No.</b>   | <b>Protein</b>                                                        | <b>Matched (SEQUEST MASCOT)</b> | <b>emPAI</b> | <b>Strategy.Hits</b> | <b>PepMatched(SEQUEST MASCOT)</b> | <b>SpectraMatched(SEQUEST MASCOT)</b> |     |    |  |
| 453.         | IPI00197900                                                           | Y N                             | 0.42         | 2                    | 6 0                               | 21 0                                  |     |    |  |
| <b>*Des:</b> | 29 kDa protein                                                        |                                 |              |                      |                                   |                                       |     |    |  |
|              | <b>SEQUEST:(PepMatched Observed.Hits Coverage)</b>                    | <b>6</b>                        | <b>3</b>     | <b>32.06%</b>        |                                   |                                       |     |    |  |
|              | <b>Seq Charge Xcor Delta Probility PepHits</b>                        |                                 |              |                      |                                   |                                       |     |    |  |
|              | FYEQMNGPVTAGSR                                                        | +2                              | 4.943        | 0.500                | 1.0000                            | 9                                     |     |    |  |
|              | IASLEVENQNLNLR                                                        | +2                              | 4.323        | 0.467                | 1.0000                            | 5                                     |     |    |  |
|              | FEEHVQSVDIAAFNK                                                       | +2                              | 5.177        | 0.586                | 1.0000                            | 3                                     |     |    |  |
|              | VGTDLLEEEITK                                                          | +2                              | 3.424        | 0.327                | 0.9981                            | 1                                     |     |    |  |
|              | GVVQDLQQAISK                                                          | +2                              | 3.752        | 0.467                | 0.9998                            | 9                                     |     |    |  |
|              | SIQLDGLVWGASK                                                         | +2                              | 4.452        | 0.572                | 1.0000                            | 3                                     |     |    |  |
|              | <b>MASCOT:(PepMatched Observed.Hits Coverage)</b>                     |                                 |              |                      |                                   |                                       |     |    |  |
| <b>No.</b>   | <b>Protein</b>                                                        | <b>Matched (SEQUEST MASCOT)</b> | <b>emPAI</b> | <b>Strategy.Hits</b> | <b>PepMatched(SEQUEST MASCOT)</b> | <b>SpectraMatched(SEQUEST MASCOT)</b> |     |    |  |
| 454.         | IPI00200466                                                           | Y Y                             | 0.35         | 2                    | 6 3                               | 17 32                                 |     |    |  |
| <b>*Des:</b> | ADP,ATP carrier protein 2                                             |                                 |              |                      |                                   |                                       |     |    |  |
|              | <b>SEQUEST:(PepMatched Observed.Hits Coverage)</b>                    | <b>6</b>                        | <b>4</b>     | <b>22.84%</b>        |                                   |                                       |     |    |  |
|              | <b>Seq Charge Xcor Delta Probility PepHits</b>                        |                                 |              |                      |                                   |                                       |     |    |  |
|              | YFPTQALNFAFK                                                          | +2                              | 3.882        | 0.531                | 1.0000                            | 9                                     |     |    |  |
|              | GMGGAFVLVLYDEIKK                                                      | +2                              | 4.895        | 0.486                | 1.0000                            | 3                                     |     |    |  |
|              | LLLQVQHASK                                                            | +2                              | 2.927        | 0.390                | 0.9992                            | 9                                     |     |    |  |
|              | VKLLLQVQHASK                                                          | +2                              | 4.094        | 0.375                | 0.9943                            | 5                                     |     |    |  |
|              | AAYFGIYDTAK                                                           | +2                              | 3.987        | 0.584                | 1.0000                            | 5                                     |     |    |  |
|              | DFLAGGVAAAISK                                                         | +2                              | 4.923        | 0.514                | 0.9569                            | 11                                    |     |    |  |
|              | <b>MASCOT:(PepMatched Observed.Hits Coverage)</b>                     | <b>3</b>                        | <b>3</b>     | <b>8.6%</b>          |                                   |                                       |     |    |  |
|              | <b>Seq Charge ObservedMS ExpectedMS CalculatedMS Pepscore PepHits</b> |                                 |              |                      |                                   |                                       |     |    |  |
|              | GMGGAFVLVLYDEIK                                                       | +2                              | 806.4425     | 1610.8705            | 1610.8377                         | 0.03                                  | 90  | 4  |  |
|              | GMGGAFVLVLYDEIKK                                                      | +2                              | 870.4880     | 1738.9615            | 1738.9327                         | 0.03                                  | 72  | 4  |  |
|              | GAWSNVLR                                                              | +2                              | 451.7527     | 901.4909             | 901.4770                          | 0.01                                  | 44  | 5  |  |
| <b>No.</b>   | <b>Protein</b>                                                        | <b>Matched (SEQUEST MASCOT)</b> | <b>emPAI</b> | <b>Strategy.Hits</b> | <b>PepMatched(SEQUEST MASCOT)</b> | <b>SpectraMatched(SEQUEST MASCOT)</b> |     |    |  |
| 455.         | IPI00382131                                                           | N Y                             | 0.12         | 1                    | 0 2                               | 0 2                                   |     |    |  |
| <b>*Des:</b> | Ab1-018                                                               |                                 |              |                      |                                   |                                       |     |    |  |
|              | <b>SEQUEST:(PepMatched Observed.Hits Coverage)</b>                    |                                 |              |                      |                                   |                                       |     |    |  |

Identified Human Platelet Proteins

| No.   | Protein                                                     | Matched (SEQUEST MASCOT) | emPAI | Strategy.Hits | PepMatched(SEQUEST MASCOT) | SpectraMatched(SEQUEST MASCOT) |
|-------|-------------------------------------------------------------|--------------------------|-------|---------------|----------------------------|--------------------------------|
| 456.  | IPI00331865                                                 | Y                        | 0.24  | 1             | 3                          | 2                              |
| *Des: | Splice Isoform 2 of Drebrin-like protein                    |                          |       |               |                            |                                |
|       | SEQUEST:(PepMatched Observed.Hits Coverage)                 | 3                        |       | 1             | 9.97%                      |                                |
|       | Seq Charge ObservedMS ExpectedMS CalculatedMS               |                          |       |               |                            | PepScore PepHits               |
|       | YFQGLMNR +2 514.7798 1027.5450 1027.4909 0.05 56            |                          |       |               |                            | 1                              |
|       | DHGLESLQSTQK +2 671.8796 1341.7446 1341.6524 0.09 36        |                          |       |               |                            | 2                              |
| 457.  | IPI00358003                                                 | Y                        | 0.64  | 1             | 11                         | 9                              |
| *Des: | PREDICTED: similar to 5-nucleotidase, cytosolic III         |                          |       |               |                            |                                |
|       | SEQUEST:(PepMatched Observed.Hits Coverage)                 | 11                       |       | 4             | 48.07%                     |                                |
|       | Seq Charge Xcor Delta Probility PepHits                     |                          |       |               |                            |                                |
|       | GELIHVFNK +2 2.842 0.308 0.9925 1                           |                          |       |               |                            |                                |
|       | SHGLLIEQGIPK +2 2.986 0.441 0.9984 2                        |                          |       |               |                            |                                |
|       | NTDYFSQLK +2 2.720 0.360 0.9953 2                           |                          |       |               |                            |                                |
|       | MADGVANVEHILK +2 3.547 0.464 0.9995 3                       |                          |       |               |                            |                                |
|       | DNSNIILLGDSQGDLR +2 4.337 0.428 0.9996 1                    |                          |       |               |                            |                                |
|       | EESLEVVNSILQK +2 4.149 0.449 0.9997 2                       |                          |       |               |                            |                                |
|       | EQYYAIEVDPVLTVEEK +2 5.859 0.582 1.0000 2                   |                          |       |               |                            |                                |
|       | VVSNFMDFDENGVLK +2 4.552 0.503 0.9999 1                     |                          |       |               |                            |                                |
|       | FPYMVEWYTK +2 2.806 0.369 0.9957 1                          |                          |       |               |                            |                                |
|       | LQIITDFDMLSR +2 2.984 0.451 0.9984 1                        |                          |       |               |                            |                                |
|       | LQQHGIPVFIFISAGIGDVLEEIVR +2 6.131 0.681 1.0000 4           |                          |       |               |                            |                                |
|       | MASCOT:(PepMatched Observed.Hits Coverage)                  | 9                        |       | 4             | 39.76%                     |                                |
|       | Seq Charge ObservedMS ExpectedMS CalculatedMS               |                          |       |               |                            | PepScore PepHits               |
|       | SHGLLIEQGIPK +2 646.37 1290.73 1290.73 0 49                 |                          |       |               |                            | 1                              |
|       | NTDYFSQLK +2 558.27 1114.53 1114.53 0 47                    |                          |       |               |                            | 2                              |
|       | MADGVANVEHILK +2 698.87 1395.72 1395.72 0 85                |                          |       |               |                            | 3                              |
|       | DNSNIILLGDSQGDLR +2 865.44 1728.87 1728.86 0.01 61          |                          |       |               |                            | 1                              |
|       | FPYMVEWYTK +2 682.33 1362.64 1362.63 0.01 42                |                          |       |               |                            | 1                              |
|       | EESLEVVNSILQK +2 744.40 1486.79 1486.79 0 87                |                          |       |               |                            | 2                              |
|       | LQIITDFDMLSR +2 776.91 1551.80 1551.80 0 56                 |                          |       |               |                            | 3                              |
|       | VVSNFMDFDENGVLK +2 857.41 1712.81 1712.81 0 88              |                          |       |               |                            | 1                              |
|       | LQQHGIPVFIFISAGIGDVLEEIVR +3 879.82 2636.44 2636.43 0.01 50 |                          |       |               |                            | 3                              |
| No.   | Protein                                                     | Matched (SEQUEST MASCOT) | emPAI | Strategy.Hits | PepMatched(SEQUEST MASCOT) | SpectraMatched(SEQUEST MASCOT) |

| Identified Human Platelet Proteins |                                             |        |            |            |              |           |       |       |                  |
|------------------------------------|---------------------------------------------|--------|------------|------------|--------------|-----------|-------|-------|------------------|
| 458.                               | IPI00382134                                 | Y      | Y          | 0.2        | 3            | 2         | 10    | 3     | 113              |
| *Des:                              | Ac1-581                                     |        |            |            |              |           |       |       |                  |
|                                    | SEQUEST:(PepMatched Observed.Hits Coverage) |        |            | 2          | 1            | 6.64%     |       |       |                  |
|                                    | Seq                                         | Charge | Xcor       | Delta      | Proability   | PepHits   |       |       |                  |
|                                    | IQKLESDISAQTEYCHTPCTVNCNIPVVSGK             |        |            |            |              | +3        | 7.192 | 0.651 | 1.0000 4         |
|                                    | SKIQKLESDISAQTEYCHTPCTVNCNIPVVSGK           |        |            |            |              | +3        | 7.445 | 0.644 | 1.0000 2         |
|                                    | MASCOT:(PepMatched Observed.Hits Coverage)  |        |            | 10         | 6            | 28.32%    |       |       |                  |
|                                    | Seq                                         | Charge | ObservedMS | ExpectedMS | CalculatedMS |           |       |       | Pepscore PepHits |
|                                    | TENGGWTVIQNR                                | +2     | 688.3461   | 1374.6776  | 1373.6687    | 1.01      | 41    |       | 3                |
|                                    | IGPTELLIEMEDWKGDK                           |        | +3         | 658.6782   | 1973.0128    | 1972.9815 | 0.03  |       | 44 3             |
|                                    | NSIAELNSNINSVSETSSVTFQYLTLK                 |        | +3         | 1024.8793  | 3071.6160    | 3071.5662 | 0.05  |       | 44 1             |
|                                    | QDGSVDFGR                                   | +2     | 491.7203   | 981.4261   | 979.4359     | 1.99      | 40    |       | 3                |
|                                    | DNDGWVTTDPR                                 | +2     | 637.8853   | 1273.7561  | 1274.5527    | -0.79     | 74    |       | 9                |
|                                    | HGTDDGVVWMNWK                               |        | +2         | 772.8647   | 1543.7149    | 1543.6878 | 0.03  |       | 96 7             |
|                                    | YYWGGLYSWDMSK                               | +2     | 828.3782   | 1654.7419  | 1654.7126    | 0.03      | 85    |       | 3                |
|                                    | IGPTELLIEMEDWK                              | +2     | 837.4401   | 1672.8656  | 1672.8382    | 0.03      | 72    |       | 25               |
|                                    | LYIDETVNDNIPLNLR                            |        | +2         | 951.5185   | 1901.0224    | 1900.9894 | 0.03  |       | 84 3             |
|                                    | DNENVINEYSSILEDQK                           |        | +2         | 1005.4880  | 2008.9614    | 2008.9225 | 0.04  |       | 106 5            |

| No.  | Protein     | Matched (SEQUEST MASCOT) | emPAI | Strategy.Hits | PepMatched(SEQUEST MASCOT) | SpectraMatched(SEQUEST MASCOT) |
|------|-------------|--------------------------|-------|---------------|----------------------------|--------------------------------|
| 459. | IPI00189813 | Y Y                      | 1.2   | 4             | 16                         | 3 618 32                       |

|       |                                             |        |            |            |              |           |        |     |                  |
|-------|---------------------------------------------|--------|------------|------------|--------------|-----------|--------|-----|------------------|
| *Des: | Actin, alpha skeletal muscle                |        |            |            |              |           |        |     |                  |
|       | SEQUEST:(PepMatched Observed.Hits Coverage) |        |            | 16         | 26           | 35.41%    |        |     |                  |
|       | Seq                                         | Charge | Xcor       | Delta      | Proability   | PepHits   |        |     |                  |
|       | SYELPDGQVITIGNER                            |        |            | +3         | 5.152        | 0.473     | 1.0000 | 211 |                  |
|       | DSYVGDEAQSQR                                | +2     | 3.831      | 0.552      | 1.0000       | 73        |        |     |                  |
|       | DSYVGDEAQS                                  | +2     | 3.432      | 0.490      | 0.9998       | 11        |        |     |                  |
|       | AGFAGDDAPR                                  | +2     | 3.817      | 0.395      | 0.9997       | 176       |        |     |                  |
|       | EITALAPSTMK                                 | +2     | 3.082      | 0.471      | 0.9995       | 131       |        |     |                  |
|       | YPIEHGIITNWDDMEK                            |        | +2         | 4.752      | 0.492        | 1.0000    | 21     |     |                  |
|       | LDLAGRDLTDYLMK                              | +3     | 3.398      | 0.465      | 1.0000       | 59        |        |     |                  |
|       | LDLAGRDLTDYLMKILTER                         |        | +3         | 4.211      | 0.483        | 1.0000    | 2      |     |                  |
|       | HQGMVGMGQKDSYVGDEAQS                        |        | +2         | 5.849      | 0.699        | 1.0000    | 8      |     |                  |
|       | GILTLKYPIEHGIITNWDDMEK                      |        | +3         | 3.778      | 0.403        | 0.9999    | 6      |     |                  |
|       | MQKEITALAPSTMK                              | +2     | 5.024      | 0.465      | 1.0000       | 47        |        |     |                  |
|       | HQGMVGMGQK                                  | +2     | 3.478      | 0.387      | 0.9992       | 210       |        |     |                  |
|       | HQGMVGMGQKDSYVGDEAQSQR                      |        | +4         | 6.515      | 0.596        | 1.0000    | 88     |     |                  |
|       | IWHHTFYNELR                                 |        | +3         | 3.149      | 0.444        | 1.0000    | 6      |     |                  |
|       | AVFPSIVGRPR                                 | +2     | 3.415      | 0.346      | 0.9984       | 302       |        |     |                  |
|       | MQKEITALAPSTMKIK                            |        | +2         | 3.419      | 0.325        | 0.9817    | 2      |     |                  |
|       | MASCOT:(PepMatched Observed.Hits Coverage)  |        |            | 3          | 6            | 11.97%    |        |     |                  |
|       | Seq                                         | Charge | ObservedMS | ExpectedMS | CalculatedMS |           |        |     | Pepscore PepHits |
|       | SYELPDGQVITIGNER                            |        | +2         | 895.9525   | 1789.8905    | 1789.8846 | 0.01   |     | 52 2             |
|       | YPIEHGIITNWDDMEK                            |        | +3         | 654.3091   | 1959.9054    | 1959.9036 | 0      |     | 40 4             |
|       | IWHHTFYNELR                                 | +2     | 758.3783   | 1514.7420  | 1514.7419    | 0         | 54     |     | 41               |

| No. | Protein | Matched (SEQUEST MASCOT) | emPAI | Strategy.Hits | PepMatched(SEQUEST MASCOT) | SpectraMatched(SEQUEST MASCOT) |
|-----|---------|--------------------------|-------|---------------|----------------------------|--------------------------------|
|-----|---------|--------------------------|-------|---------------|----------------------------|--------------------------------|

Identified Human Platelet Proteins

460. IPI00231423 N Y 0.9 1 0 7 0 15

\*Des:

C9 protein

SEQUEST:(PepMatched Observed.Hits Coverage)

MASCOT:(PepMatched Observed.Hits Coverage)

| Seq                      | Charge | ObservedMS | ExpectedMS | CalculatedMS | PepScore | PepHits |
|--------------------------|--------|------------|------------|--------------|----------|---------|
| DGNTLTYYR                | +2     | 551.76     | 1101.51    | 1101.51      | 0        | 42      |
| SIEVFGQFQGK              | +2     | 620.32     | 1238.63    | 1238.63      | 0        | 46      |
| AIEDYVNEFSAR             | +2     | 707.34     | 1412.66    | 1412.66      | 0        | 51      |
| TENYEEQFEMFK             | +2     | 797.84     | 1593.66    | 1593.67      | 0        | 42      |
| GVMLTTTFLDDVK            | +2     | 720.88     | 1439.74    | 1438.74      | 1        | 74      |
| KPWNVAFLAYETK            | +2     | 783.92     | 1565.82    | 1565.82      | 0        | 43      |
| TIDVNDFINWASSLDDAPALISQK | +3     | 878.44     | 2632.31    | 2632.30      | 0.01     | 62      |

No. Protein Matched (SEQUEST MASCOT) emPAI Strategy.Hits PepMatched(SEQUEST MASCOT) SpectraMatched(SEQUEST MASCOT)

461. IPI00231426 Y Y 0.4 2 11 5 40 46

\*Des:

Phosphoglycerate kinase 1

SEQUEST:(PepMatched Observed.Hits Coverage)

| Seq                        | Charge | Xcor  | Delta | Probability | PepHits |
|----------------------------|--------|-------|-------|-------------|---------|
| NNQITNNQR                  | +2     | 3.384 | 0.340 | 0.9989      | 8       |
| LGDVYVNDAFGTAHR            | +3     | 3.331 | 0.548 | 1.0000      | 6       |
| VLNNMEIGTSLYDEEGAK         | +2     | 5.983 | 0.599 | 1.0000      | 5       |
| DCVGSEVENACANPAAGTVILLENLR | +3     | 4.496 | 0.498 | 1.0000      | 1       |
| QIVWNGPVGVFWEAFAR          | +2     | 5.048 | 0.548 | 1.0000      | 4       |
| WNTEDKVSHVSTGGGASLELLEGGK  | +3     | 4.418 | 0.522 | 1.0000      | 1       |
| TGQATVASGIPAGWMGLDCGTESSKK | +3     | 3.729 | 0.331 | 0.9995      | 2       |
| VDFNVPMKNNQITNNQR          | +3     | 4.206 | 0.453 | 1.0000      | 7       |
| AHSSMVGVNLPQK              | +3     | 4.151 | 0.338 | 1.0000      | 13      |
| SLLGKDVFLK                 | +3     | 2.328 | 0.287 | 0.9830      | 5       |
| ALESPERPFLAILGGAK          | +3     | 4.891 | 0.566 | 1.0000      | 7       |

MASCOT:(PepMatched Observed.Hits Coverage)

| Seq                | Charge | ObservedMS | ExpectedMS | CalculatedMS | PepScore | PepHits |
|--------------------|--------|------------|------------|--------------|----------|---------|
| VLNNMEIGTSLYDEEGAK | +2     | 991.9769   | 1981.9392  | 1981.9302    | 0.01     | 97      |
| SLMDEVVKATSR       | +2     | 668.3510   | 1334.6875  | 1334.6864    | 0        | 74      |
| AEPAKIDAFR         | +2     | 559.3041   | 1116.5937  | 1116.5927    | 0        | 47      |
| ALESPERPFLAILGGAK  | +2     | 885.0027   | 1767.9908  | 1767.9882    | 0        | 61      |
| NNQITNNQR          | +2     | 551.2719   | 1100.5292  | 1100.5323    | 0        | 56      |

No. Protein Matched (SEQUEST MASCOT) emPAI Strategy.Hits PepMatched(SEQUEST MASCOT) SpectraMatched(SEQUEST MASCOT)

462. IPI00189819 Y Y 0.74 4 14 10 601 98

\*Des:

Actin, cytoplasmic 1

SEQUEST:(PepMatched Observed.Hits Coverage)

| Seq                            | Charge | Xcor  | Delta | Probability | PepHits |
|--------------------------------|--------|-------|-------|-------------|---------|
| GYSFTTTAER                     | +2     | 2.905 | 0.581 | 1.0000      | 189     |
| GYSFTTTAEREIVR                 | +2     | 3.425 | 0.415 | 0.9995      | 45      |
| KDLYANTVLSSGGTMYPGIADR         | +2     | 6.578 | 0.630 | 1.0000      | 34      |
| TTGIVMDSGDGVTHTVPIYEGYALPHAILR | +3     | 6.949 | 0.646 | 1.0000      | 56      |
| LCYVALDFEQEMATAASSSLEK         | +3     | 6.886 | 0.642 | 1.0000      | 479     |

Identified Human Platelet Proteins

| Seq                                        | Charge | ObservedMS | ExpectedMS | CalculatedMS | PepScore | PepHits          |
|--------------------------------------------|--------|------------|------------|--------------|----------|------------------|
| EKLCYVALDFEQEMATAASSSSLEK                  | +2     | 5.473      | 0.675      | 1.0000       | 19       |                  |
| QEYDESGPSIVHR                              | +3     | 3.308      | 0.384      | 1.0000       | 86       |                  |
| LCYVALDFEQEMATAASSSSLEKSYELPDGQVITIGNER    | +3     | 6.463      | 0.746      | 1.0000       | 30       |                  |
| DIKEKLCYVALDFEQEMATAASSSSLEK               | +3     | 6.358      | 0.644      | 1.0000       | 28       |                  |
| ILTERGYSFTTTAER                            | +2     | 3.931      | 0.453      | 0.9999       | 16       |                  |
| FRCPEALFQPSFLGMESCIGIHETTFNSIMK            | +3     | 8.137      | 0.682      | 1.0000       | 55       |                  |
| DLTDYLMKILTERGYSFTTTAER                    | +3     | 3.310      | 0.420      | 0.9999       | 2        |                  |
| VAPEEHPVLLTEAPLNPK                         | +2     | 4.425      | 0.607      | 0.9627       | 64       |                  |
| YSVWIGGSILASLSTFQQMWISKQEYDESGPSIVHR       | +3     | 5.628      | 0.568      | 1.0000       | 5        |                  |
| MASCOT:(PepMatched Observed.Hits Coverage) |        | 10         | 9          | 29.58%       |          |                  |
| Seq                                        | Charge | ObservedMS | ExpectedMS | CalculatedMS |          | PepScore PepHits |
| IIAPPERK                                   | +2     | 462.2867   | 922.5589   | 922.5600     | 0        | 41 7             |
| DSYVGDEAQSQR                               | +2     | 677.8155   | 1353.6164  | 1353.6160    | 0        | 42 3             |
| QEYDESGPSIVHR                              | +3     | 506.2381   | 1515.6926  | 1515.6953    | 0        | 42 12            |
| AGFAGDDAPR                                 | +2     | 488.7270   | 975.4394   | 975.4410     | 0        | 57 7             |
| DSYVGDEAQSQR                               | +2     | 599.7647   | 1197.5149  | 1197.5149    | 0        | 72 7             |
| GYSFTTTAER                                 | +2     | 566.7662   | 1131.5178  | 1131.5196    | 0        | 61 14            |
| VAPEEHPVLLTEAPLNPK                         | +2     | 977.5364   | 1953.0583  | 1953.0571    | 0        | 69 11            |
| EITALAPSTMK                                | +2     | 581.3112   | 1160.6078  | 1160.6111    | 0        | 48 9             |
| IWHHTFYNELR                                | +2     | 758.3791   | 1514.7436  | 1514.7419    | 0        | 39 15            |
| HQGVVMVGMGQK                               | +2     | 586.2888   | 1170.5631  | 1170.5637    | 0        | 66 44            |

No. 463. Protein IPI00198567 Matched (SEQUEST MASCOT) Y Y emPAI Strategy.Hits 0.52 2 4 4 PepMatched(SEQUEST MASCOT) 4 7 SpectraMatched(SEQUEST MASCOT) 8

\*Des:

LIM and SH3 domain protein 1

| Seq                                         | Charge | Xcor       | Delta      | Probability  | PepHits    |                  |
|---------------------------------------------|--------|------------|------------|--------------|------------|------------------|
| SEQUEST:(PepMatched Observed.Hits Coverage) |        |            |            |              | 4 4 19.77% |                  |
| TGDTGMLPANYVEA                              | +2     | 2.760      | 0.431      | 0.9658       | 1          |                  |
| QSFTMVADTPENLR                              | +2     | 3.290      | 0.400      | 0.9985       | 1          |                  |
| YKEEFEKNK                                   | +2     | 2.881      | 0.255      | 0.9554       | 2          |                  |
| LKQQSELQSQR                                 | +2     | 3.643      | 0.196      | 0.9507       | 4          |                  |
| MASCOT:(PepMatched Observed.Hits Coverage)  |        |            |            |              | 4 3 20.14% |                  |
| Seq                                         | Charge | ObservedMS | ExpectedMS | CalculatedMS |            | PepScore PepHits |
| EPAAPVSIQR                                  | +2     | 534.30     | 1066.58    | 1066.58      | 0          | 46 3             |
| MGPSGGEGIEPER                               | +2     | 658.31     | 1314.60    | 1314.59      | 0.01       | 66 3             |
| GFSVVADTPELQR                               | +2     | 709.87     | 1417.73    | 1417.72      | 0.01       | 60 2             |
| QSFTMVADTPENLR                              | +2     | 804.89     | 1607.77    | 1607.76      | 0.01       | 78 2             |

No. 464. Protein IPI00215243 Matched (SEQUEST MASCOT) Y Y emPAI Strategy.Hits 0.6 2 3 3 PepMatched(SEQUEST MASCOT) 3 5 SpectraMatched(SEQUEST MASCOT) 12

\*Des:

Splice Isoform RC6-IL of Proteasome subunit alpha type 7

| Seq                                         | Charge | Xcor  | Delta | Probability | PepHits    |
|---------------------------------------------|--------|-------|-------|-------------|------------|
| SEQUEST:(PepMatched Observed.Hits Coverage) |        |       |       |             | 3 2 19.69% |
| ALLEVVQSGGK                                 | +2     | 2.879 | 0.514 | 0.9999      | 1          |
| NYTDDAIETDDLTIK                             | +2     | 4.997 | 0.519 | 1.0000      | 2          |
| AITVFSPDGHLFQVEYAQEAVK                      | +3     | 3.657 | 0.391 | 0.9996      | 2          |
| MASCOT:(PepMatched Observed.Hits Coverage)  |        |       |       |             | 3 1 16.6%  |



Identified Human Platelet Proteins

| Seq             | Charge | ObservedMS | ExpectedMS | CalculatedMS | Pepscore | PepHits |
|-----------------|--------|------------|------------|--------------|----------|---------|
| LYQTDPSGTYHAWK  |        | +2         | 833.39     | 1664.77      | 1665.78  | -1 48   |
| ALLEVVQSGGK     | +2     | 550.82     | 1099.63    | 1099.62      | 0.01     | 48 4    |
| NYTDDAIETDDLTIK | +2     | 863.92     | 1725.82    | 1725.79      | 0.03     | 116 4   |

No. 465. Protein IPI00214442 Matched (SEQUEST MASCOT) N Y emPAI Strategy.Hits 0.05 1 0 2 0 2 SpectraMatched(SEQUEST MASCOT) 2

\*Des: Nck-associated protein 1  
 SEQUEST:(PepMatched Observed.Hits Coverage)  
 MASCOT:(PepMatched Observed.Hits Coverage) 2 1 1.91%

| Seq         | Charge | ObservedMS | ExpectedMS | CalculatedMS | Pepscore | PepHits |
|-------------|--------|------------|------------|--------------|----------|---------|
| IGQETDKTTTR | +2     | 625.3284   | 1248.6422  | 1248.6310    | 0.01     | 58 1    |
| TISQAVNKK   | +2     | 494.7959   | 987.5772   | 987.5713     | 0.01     | 46 2    |

No. 466. Protein IPI00371718 Matched (SEQUEST MASCOT) Y Y emPAI Strategy.Hits 0.47 5 57 74 316 1243 SpectraMatched(SEQUEST MASCOT)

\*Des: PREDICTED: similar to Filamin A (Alpha-filamin) (Filamin 1) (Endothelial actin-binding protein) (Actin-binding protein 280) (ABP-280) (Nonmuscle filamin)

SEQUEST:(PepMatched Observed.Hits Coverage) 57 23 28.59%

| Seq                           | Charge | Xcor  | Delta | Probility | PepHits |    |  |
|-------------------------------|--------|-------|-------|-----------|---------|----|--|
| SGQSAAGASPAGGIDTR             | +2     |       | 5.195 | 0.588     | 1.0000  | 6  |  |
| VTAQGPGLPSGNIANK              | +2     |       | 5.455 | 0.637     | 1.0000  | 6  |  |
| AYGPGIEPTGNMVK                | +2     | 3.982 | 0.489 | 1.0000    | 7       |    |  |
| TGVAINKPAEFTVDAK              | +2     | 4.500 | 0.571 | 1.0000    | 13      |    |  |
| ANLPQSFQVDTSK                 | +2     | 4.382 | 0.545 | 1.0000    | 7       |    |  |
| GAGTGGLGLAVEGPSEAK            | +2     | 5.084 | 0.601 | 1.0000    | 5       |    |  |
| VSGLVDKVDVGKDQEFVTK           | +2     | 6.097 | 0.610 | 1.0000    | 7       |    |  |
| DGSCGVAYVVQEPGDYEVSVK         | +2     | 4.335 | 0.553 | 1.0000    | 5       |    |  |
| AWGPGLEGGIVGK                 | +2     | 3.667 | 0.509 | 1.0000    | 14      |    |  |
| IANLQTDLSDGLR                 | +2     | 4.077 | 0.430 | 0.9997    | 7       |    |  |
| GLVEPVDVVDNADGTQTVNYVPSR      | +2     |       | 6.434 | 0.679     | 1.0000  | 11 |  |
| EGSYSISVLGEEVPR               | +2     | 4.533 | 0.625 | 1.0000    | 2       |    |  |
| GTVEPQLEAR                    | +2     | 3.014 | 0.329 | 0.9966    | 4       |    |  |
| VEPGLGADNSVVR                 | +2     | 2.703 | 0.459 | 0.9983    | 1       |    |  |
| TPCEEILVK                     | +2     | 2.708 | 0.255 | 0.9850    | 2       |    |  |
| DAEMPATEKDLAEDAPWK            | +2     | 4.917 | 0.477 | 1.0000    | 3       |    |  |
| QMQLENVVALEFLDR               | +2     | 4.015 | 0.447 | 0.9997    | 1       |    |  |
| VKVEPSHDASK                   | +2     | 3.304 | 0.466 | 0.9983    | 6       |    |  |
| VPVHDVTDASK                   | +2     | 2.890 | 0.357 | 0.9964    | 2       |    |  |
| WGDEHIPGSPYR                  | +3     | 2.828 | 0.306 | 0.9986    | 4       |    |  |
| DAEMPATEKDLAEDAPWKK           | +2     | 4.219 | 0.555 | 1.0000    | 3       |    |  |
| EAGAGGLAIAVEGPSKAEISFEDRK     | +3     | 5.621 | 0.491 | 1.0000    | 4       |    |  |
| VHSPSGALEECYVTEIDQDKYAVR      | +3     | 3.974 | 0.467 | 1.0000    | 1       |    |  |
| EGSYSISVLGEEVPRSPFK           | +2     | 4.359 | 0.616 | 1.0000    | 2       |    |  |
| ALGALVDSCAPGLCPDWDSDASKPVNNAR | +3     | 4.722 | 0.606 | 1.0000    | 3       |    |  |
| QMQLENVVALEFLDRESIK           | +3     | 3.474 | 0.323 | 0.9986    | 6       |    |  |
| VNVGAGSHPNK                   | +2     | 2.809 | 0.521 | 0.9996    | 4       |    |  |

Identified Human Platelet Proteins

| Seq                                        | Charge | ObservedMS | ExpectedMS | CalculatedMS | Pepscore | PepHits |    |
|--------------------------------------------|--------|------------|------------|--------------|----------|---------|----|
| AGVAPLQVK                                  | +2     | 3.116      | 0.509      | 1.0000       | 19       |         |    |
| VAQPSITDNKDGTVTVR                          | +2     | 3.860      | 0.470      | 0.9987       | 2        |         |    |
| GKLDVQFSGLAK                               | +2     | 3.863      | 0.494      | 1.0000       | 15       |         |    |
| LVSNHSLHETSSVFVDSLTK                       | +2     | 5.941      | 0.594      | 1.0000       | 11       |         |    |
| SPFSVGVSPSLDLSK                            | +2     | 4.067      | 0.426      | 0.9996       | 4        |         |    |
| DKGEYTLVVKWGDEHIPGSPYR                     | +3     | 4.067      | 3.988      | 0.532        | 1.0000   | 1       |    |
| TFSVWYVPEVTGTHK                            | +3     | 2.570      | 0.444      | 0.9999       | 4        |         |    |
| RLTVSSLQESGLK                              | +2     | 3.522      | 0.373      | 0.9987       | 1        |         |    |
| VTVLFAGQHIAK                               | +2     | 3.932      | 0.465      | 1.0000       | 14       |         |    |
| VKVEPSHDASKVK                              | +2     | 3.538      | 0.539      | 1.0000       | 7        |         |    |
| ALTQTGGPHVK                                | +2     | 3.280      | 0.463      | 0.9996       | 32       |         |    |
| AYGPGIEPTGNMVKK                            | +2     | 3.790      | 0.353      | 0.9984       | 5        |         |    |
| AFGPGQLQGGNAGSPAR                          | +2     | 4.477      | 0.538      | 1.0000       | 18       |         |    |
| VNVGAGSHPNKVK                              | +2     | 4.143      | 0.453      | 1.0000       | 18       |         |    |
| VRVHGPGIQSGTTNKNKPNK                       | +3     | 4.680      | 0.438      | 1.0000       | 6        |         |    |
| VHGPGIQSGTTNKNKFTVETR                      | +2     | 4.680      | 5.314      | 0.605        | 1.0000   | 22      |    |
| VATVPQHATSGPGPADVSKVVAK                    | +3     | 4.333      | 0.612      | 1.0000       | 4        |         |    |
| TAGKGKLDVQFSGLAK                           | +3     | 4.610      | 0.514      | 1.0000       | 18       |         |    |
| YGGPYHIGGSPFK                              | +2     | 4.036      | 0.464      | 1.0000       | 4        |         |    |
| VATVPQHATSGPGPADVSK                        | +2     | 4.842      | 0.577      | 1.0000       | 45       |         |    |
| TGVELGKPTHFTVNAK                           | +3     | 3.321      | 0.471      | 1.0000       | 11       |         |    |
| FNGTHIPGSPFK                               | +2     | 2.990      | 0.326      | 0.9945       | 5        |         |    |
| LIALLEVLQSQQK                              | +2     | 4.043      | 0.494      | 1.0000       | 41       |         |    |
| NGHVGISFVPKETGEHLVHVKK                     | +3     | 3.367      | 0.501      | 1.0000       | 2        |         |    |
| AEGPGLNRTGVELGKPTHFTVNAK                   | +3     | 3.210      | 0.393      | 0.9995       | 1        |         |    |
| IVSPSGAAVPCKVEPGLGADNSVVR                  | +3     | 4.981      | 0.434      | 1.0000       | 17       |         |    |
| AGNNMLLVGVHGPR                             | +3     | 3.436      | 0.447      | 1.0000       | 8        |         |    |
| VRAWGPGLEGGIVGK                            | +2     | 3.215      | 0.385      | 0.9891       | 1        |         |    |
| HTAMVSWGGSIPNSPFR                          | +2     | 5.094      | 0.614      | 1.0000       | 4        |         |    |
| TFSVWYVPEVTGTHKVTVLFAGQHIAK                | +3     | 4.351      | 0.522      | 1.0000       | 1        |         |    |
| MASCOT:(PepMatched Observed.Hits Coverage) |        | 74         | 30         | 41.87%       |          |         |    |
| AEFTVETR                                   | +2     | 476.74     | 951.47     | 951.47       | 0        | 57      | 16 |
| GTVEPQLEAR                                 | +2     | 550.29     | 1098.57    | 1098.57      | 0        | 59      | 35 |
| VPVHDVTDASK                                | +2     | 584.31     | 1166.60    | 1166.59      | 0.01     | 50      | 1  |
| VSGLVDKVDVGK                               | +2     | 608.99     | 1215.96    | 1214.69      | 1.27     | 44      | 2  |
| VEPGLGADNSVVR                              | +2     | 656.85     | 1311.69    | 1311.68      | 0.01     | 80      | 50 |
| VDVGKDQEFTVK                               | +2     | 682.86     | 1363.71    | 1363.70      | 0.01     | 71      | 27 |
| AFGPGQLQGGNAGSPAR                          | +2     | 728.87     | 1455.73    | 1455.72      | 0.01     | 92      | 89 |
| SGQSAAGASPAGGIDTR                          | +2     | 751.87     | 1501.72    | 1501.71      | 0.01     | 96      | 3  |
| VTAQGPGLPSGNIANK                           | +2     | 826.94     | 1651.86    | 1651.85      | 0.01     | 92      | 62 |
| TGVELGKPTHFTVNAK                           | +2     | 849.97     | 1697.92    | 1697.91      | 0.01     | 82      | 26 |
| VQVQDNEGHSVETTVK                           | +2     | 885.44     | 1768.87    | 1768.86      | 0.01     | 95      | 22 |
| VAQPSITDNKDGTVTVR                          | +2     | 900.98     | 1799.95    | 1799.94      | 0.01     | 86      | 12 |
| VATVPQHATSGPGPADVSK                        | +2     | 909.98     | 1817.94    | 1817.93      | 0.01     | 77      | 96 |
| LPQLPITNFSR                                | +2     | 643.37     | 1284.73    | 1284.72      | 0.01     | 64      | 18 |
| AEAGVPAEFGIWTR                             | +2     | 752.39     | 1502.76    | 1502.75      | 0.01     | 64      | 7  |

Identified Human Platelet Proteins

|                               |    |        |         |         |       |     |     |  |
|-------------------------------|----|--------|---------|---------|-------|-----|-----|--|
| VTYTPMAPGSYLISIK              | +2 | 870.97 | 1739.93 | 1739.92 | 0.01  | 65  | 14  |  |
| TFSVWYVPEVTGTHK               | +2 | 875.95 | 1749.89 | 1749.87 | 0.02  | 57  | 26  |  |
| QMQLENVSVALEFLDR              | +2 | 946.49 | 1890.96 | 1890.95 | 0.01  | 118 | 24  |  |
| HTAMVSWGGSIPNSPFR             | +2 | 971.99 | 1941.97 | 1941.95 | 0.02  | 116 | 9   |  |
| SADFVVEAIGDDVGLGFSVEGSPQAK    | +3 | 899.11 | 2694.31 | 2694.30 | 0.01  | 109 | 26  |  |
| TTYFEIFTAGAGIGEVEVVIQDPTGQK   | +3 | 957.49 | 2869.46 | 2869.44 | 0.02  | 61  | 12  |  |
| VGSAADIPINISETDLSELLTATVPPSGR | +3 | 965.20 | 2892.57 | 2892.54 | 0.03  | 60  | 10  |  |
| LIALLEVLISQK                  | +2 | 613.89 | 1225.77 | 1225.76 | 0.01  | 92  | 177 |  |
| AGVAPLQVK                     | +2 | 442.74 | 883.47  | 881.53  | 1.94  | 55  | 16  |  |
| AEISFEDR                      | +2 | 483.73 | 965.45  | 965.45  | 0     | 42  | 22  |  |
| DKGEYTLVVK                    | +2 | 576.32 | 1150.63 | 1150.62 | 0.01  | 66  | 87  |  |
| EATTEFSVDAR                   | +2 | 613.29 | 1224.57 | 1224.56 | 0.01  | 72  | 98  |  |
| YGGQPVPNFPSK                  | +2 | 645.83 | 1289.65 | 1289.64 | 0.01  | 81  | 46  |  |
| DVDIIDHHDNTYTVK               | +2 | 892.93 | 1783.85 | 1783.84 | 0.01  | 80  | 22  |  |
| WGDEHIPGSPYR                  | +2 | 707.34 | 1412.66 | 1412.65 | 0.01  | 61  | 77  |  |
| AYGPGIEPTGNMVK                | +2 | 717.36 | 1432.71 | 1432.70 | 0.01  | 56  | 22  |  |
| ANLPQSFQVDTSK                 | +2 | 717.87 | 1433.73 | 1433.72 | 0.01  | 72  | 55  |  |
| YNDQHIPGSPFTAR                | +2 | 801.89 | 1601.77 | 1601.76 | 0.01  | 65  | 69  |  |
| TGVAINKPAEFTVDAK              | +2 | 830.96 | 1659.90 | 1659.88 | 0.02  | 98  | 83  |  |
| SPYTVTVGQACNPTACR             | +2 | 883.41 | 1764.81 | 1766.81 | -1.99 | 49  | 4   |  |
| TGVAINKPAEFTVDAKHAGKAPLR      | +3 | 830.96 | 2489.85 | 2490.37 | -0.51 | 52  | 30  |  |
| KTHIQDNHDGTYTVAYVPDVTGR       | +3 | 863.10 | 2586.27 | 2586.25 | 0.02  | 89  | 21  |  |
| DLAEDAPWKK                    | +2 | 586.81 | 1171.60 | 1171.59 | 0.01  | 48  | 21  |  |
| LTVSSLQESGLK                  | +2 | 631.36 | 1260.70 | 1260.69 | 0.01  | 91  | 35  |  |
| GAGTGGLGLAVEGPSEAK            | +2 | 785.91 | 1569.81 | 1569.80 | 0.01  | 122 | 68  |  |
| YSPSEAGLHEMDIR                | +2 | 802.88 | 1603.74 | 1603.73 | 0.01  | 65  | 30  |  |
| FNGTHIPGSPFK                  | +2 | 651.34 | 1300.67 | 1300.66 | 0.01  | 58  | 61  |  |
| EAGAGGLAIAVEGPSK              | +2 | 713.89 | 1425.76 | 1425.75 | 0.01  | 126 | 58  |  |
| NGHVGISFVPK                   | +2 | 578.32 | 1154.62 | 1153.62 | 1     | 44  | 48  |  |
| FADQHVPGPSFVSVK               | +2 | 758.39 | 1514.77 | 1514.75 | 0.02  | 61  | 56  |  |
| VSGLVDKVDVGKDQEFTVK           | +3 | 688.38 | 2062.11 | 2062.09 | 0.02  | 65  | 37  |  |
| YTPVQQGPVGVSVTYGGDHIK         | +3 | 767.07 | 2298.18 | 2298.16 | 0.02  | 48  | 20  |  |
| GKLDVQFSGLAK                  | +2 | 631.86 | 1261.72 | 1261.70 | 0.02  | 75  | 32  |  |
| VTVLFAGQHIAK                  | +2 | 642.38 | 1282.75 | 1282.74 | 0.01  | 87  | 59  |  |
| YGGPYHIGGSPFK                 | +2 | 690.35 | 1378.68 | 1378.67 | 0.01  | 79  | 41  |  |
| AGNNMLLVGVHGPR                | +3 | 478.93 | 1433.76 | 1433.76 | 0     | 73  | 37  |  |
| VNQPASFAVSLNGAK               | +2 | 751.91 | 1501.80 | 1501.79 | 0.01  | 87  | 13  |  |
| FVPAEMGMHTVSVK                | +2 | 766.89 | 1531.77 | 1531.75 | 0.02  | 76  | 9   |  |
| SPFEVYVDK                     | +2 | 542.27 | 1082.53 | 1082.53 | 0     | 66  | 14  |  |
| ENGVYLIDVK                    | +2 | 575.81 | 1149.60 | 1148.61 | 0.99  | 50  | 11  |  |
| DAGEGGLSLAIEGPSK              | +2 | 750.88 | 1499.75 | 1499.75 | 0     | 105 | 12  |  |
| LVSNSLSLHETSSVFVDSLTK         | +3 | 734.05 | 2199.14 | 2199.12 | 0.02  | 105 | 11  |  |
| SAGQGEVLVYVEDPAGHQEEAK        | +3 | 771.71 | 2312.11 | 2312.09 | 0.02  | 68  | 11  |  |
| KNGQHVASSPIPVVISQSEIGDASR     | +3 | 859.78 | 2576.33 | 2575.34 | 0.99  | 56  | 2   |  |
| DLAEDAPWK                     | +2 | 522.76 | 1043.50 | 1043.49 | 0.01  | 49  | 18  |  |
| LYSVSYLLK                     | +2 | 542.84 | 1083.67 | 1084.62 | -0.94 | 50  | 5   |  |
| AWGPGLEGGIVGK                 | +2 | 620.84 | 1239.67 | 1239.66 | 0.01  | 71  | 18  |  |

Identified Human Platelet Proteins

|                           |    |        |         |         |         |      |     |    |  |
|---------------------------|----|--------|---------|---------|---------|------|-----|----|--|
| YGD EIPFSPYR              | +2 | 700.83 | 1399.65 | 1399.64 | 0.01    | 70   | 8   |    |  |
| IANLQTDLS DGLR            | +2 | 708.38 | 1414.75 | 1414.74 | 0.01    | 97   | 16  |    |  |
| SPFSVGVSPSLDLSK           | +2 |        | 760.41  | 1518.80 | 1518.79 | 0.01 | 92  | 7  |  |
| DAGYGGLSL SIEGPSK         | +2 |        | 775.89  | 1549.77 | 1549.76 | 0.01 | 96  | 7  |  |
| EGSYSISVLYGEEVPR          | +2 |        | 957.46  | 1912.91 | 1912.91 | 0    | 107 | 13 |  |
| DAGEGLLAVQITDPEGKPK       | +2 |        | 969.52  | 1937.02 | 1937.01 | 0.01 | 109 | 15 |  |
| ASG PGLNTTGVPASLPVEFTIDAK | +3 |        | 781.42  | 2341.24 | 2341.22 | 0.02 | 46  | 3  |  |
| VSGQGLHEGHTFEPAEFIIDTR    | +3 |        | 814.07  | 2439.20 | 2439.18 | 0.02 | 59  | 5  |  |
| FNEEHIPDSPFVVPVASPSGDAR   | +3 |        | 823.07  | 2466.20 | 2466.18 | 0.02 | 53  | 12 |  |
| GLVEPVDVVDNADGTQTVNYVPSR  | +3 |        | 848.76  | 2543.27 | 2543.25 | 0.02 | 69  | 7  |  |
| LLGWIQNK                  | +2 | 486.29 | 970.56  | 970.56  | 0       | 64   | 16  |    |  |
| GQHVPGPSPFQFTVGPLGEGGAHK  | +3 |        | 768.73  | 2303.17 | 2303.14 | 0.03 | 50  | 8  |  |

|          |                                             |                          |            |               |                            |                                |        |   |  |  |
|----------|---------------------------------------------|--------------------------|------------|---------------|----------------------------|--------------------------------|--------|---|--|--|
| No. 467. | Protein                                     | Matched (SEQUEST MASCOT) | emPAI      | Strategy.Hits | PepMatched(SEQUEST MASCOT) | SpectraMatched(SEQUEST MASCOT) |        |   |  |  |
|          | IPI00231356                                 | Y Y                      | 0.09       | 2             | 2 3 3                      | 9                              |        |   |  |  |
| *Des:    | C-1-tetrahydrofolate synthase, cytoplasmic  |                          |            |               |                            |                                |        |   |  |  |
|          | SEQUEST:(PepMatched Observed.Hits Coverage) |                          |            |               | 2                          | 1                              | 4.94%  |   |  |  |
|          | Seq                                         | Charge                   | Xcor       | Delta         | Proability                 | PepHits                        |        |   |  |  |
|          | YSQLQPHVVVLVATVR                            |                          |            | +3            | 4.404                      | 0.517                          | 1.0000 | 2 |  |  |
|          | MASCOT:(PepMatched Observed.Hits Coverage)  |                          |            |               | 3                          | 2                              | 4.62%  |   |  |  |
|          | Seq                                         | Charge                   | ObservedMS | ExpectedMS    | CalculatedMS               | Pepscore PepHits               |        |   |  |  |
|          | ASFITVPGGGVGPMTVAMLMQSTVESAQR               |                          |            | +3            | 3.676                      | 0.506                          | 0.9999 | 1 |  |  |
|          | AYTEEDLDLVEK                                | +2                       | 712.8553   | 1423.6960     | 1423.6718                  | 0.02                           | 48     | 1 |  |  |
|          | TDPAALTDDEINR                               | +2                       | 715.8549   | 1429.6952     | 1429.6685                  | 0.03                           | 70     | 4 |  |  |
|          | EIGLLTEEVELYGETK                            | +2                       | 911.9865   | 1821.9585     | 1821.9247                  | 0.03                           | 62     | 4 |  |  |

|          |                                                  |                          |            |               |                            |                                |        |   |  |  |
|----------|--------------------------------------------------|--------------------------|------------|---------------|----------------------------|--------------------------------|--------|---|--|--|
| No. 468. | Protein                                          | Matched (SEQUEST MASCOT) | emPAI      | Strategy.Hits | PepMatched(SEQUEST MASCOT) | SpectraMatched(SEQUEST MASCOT) |        |   |  |  |
|          | IPI00568723                                      | N Y                      | 0.77       | 1             | 0 2 0                      | 8                              |        |   |  |  |
| *Des:    | PREDICTED: similar to immunoglobulin light chain |                          |            |               |                            |                                |        |   |  |  |
|          | SEQUEST:(PepMatched Observed.Hits Coverage)      |                          |            |               | 2                          | 1                              | 13.81% |   |  |  |
|          | MASCOT:(PepMatched Observed.Hits Coverage)       |                          |            |               | 2                          | 1                              | 13.81% |   |  |  |
|          | Seq                                              | Charge                   | ObservedMS | ExpectedMS    | CalculatedMS               | Pepscore PepHits               |        |   |  |  |
|          | FSGSGSGTDFTLK                                    | +2                       | 652.31     | 1302.61       | 1302.61                    | 0                              | 88     | 6 |  |  |
|          | FSGVPDRFSGSGSGTDFTLK                             | +3                       | 688.00     | 2060.99       | 2060.98                    | 0.01                           | 47     | 2 |  |  |

|          |                                             |                          |            |               |                            |                                |        |   |  |  |
|----------|---------------------------------------------|--------------------------|------------|---------------|----------------------------|--------------------------------|--------|---|--|--|
| No. 469. | Protein                                     | Matched (SEQUEST MASCOT) | emPAI      | Strategy.Hits | PepMatched(SEQUEST MASCOT) | SpectraMatched(SEQUEST MASCOT) |        |   |  |  |
|          | IPI00370844                                 | Y Y                      | 0.17       | 2             | 4 4 5                      | 7                              |        |   |  |  |
| *Des:    | PREDICTED: similar to PLS1 protein          |                          |            |               |                            |                                |        |   |  |  |
|          | SEQUEST:(PepMatched Observed.Hits Coverage) |                          |            |               | 4                          | 3                              | 10.92% |   |  |  |
|          | Seq                                         | Charge                   | Xcor       | Delta         | Proability                 | PepHits                        |        |   |  |  |
|          | MINLSEPDTIDER                               | +2                       | 4.669      | 0.432         | 1.0000                     | 2                              |        |   |  |  |
|          | EHLTDEDKLNNAK                               | +2                       | 3.959      | 0.592         | 1.0000                     | 1                              |        |   |  |  |
|          | SISTSLPVLDLIDAIAPNAVRPEMIK                  |                          |            | +3            | 3.424                      | 0.443                          | 1.0000 | 4 |  |  |
|          | AGFMLQEADKLGCR                              | +2                       | 3.266      | 0.384         | 0.9910                     | 3                              |        |   |  |  |
|          | MASCOT:(PepMatched Observed.Hits Coverage)  |                          |            |               | 4                          | 2                              | 9.2%   |   |  |  |
|          | Seq                                         | Charge                   | ObservedMS | ExpectedMS    | CalculatedMS               | Pepscore PepHits               |        |   |  |  |
|          | MINLSEPDTIDER                               | +2                       | 766.8737   | 1531.7329     | 1531.7188                  | 0.01                           | 65     | 4 |  |  |

Identified Human Platelet Proteins

|                   |    |          |           |           |      |    |   |
|-------------------|----|----------|-----------|-----------|------|----|---|
| KIENCNYAVELGKNEAK | +3 | 641.6632 | 1921.9678 | 1921.9567 | 0.01 | 50 | 1 |
| EHLTDEDKLNNAK     | +2 | 763.8821 | 1525.7497 | 1525.7372 | 0.01 | 63 | 1 |
| AYFHLLNQUIAPK     | +2 | 707.9074 | 1413.8003 | 1413.7768 | 0.02 | 41 | 1 |

No. 470. Protein IPI00195156 Matched (SEQUEST MASCOT) N Y emPAI Strategy.Hits 0.31 1 PepMatched(SEQUEST MASCOT) 0 6 SpectraMatched(SEQUEST MASCOT) 0 8

\*Des:

Dipeptidyl-peptidase III

SEQUEST:(PepMatched Observed.Hits Coverage)

MASCOT:(PepMatched Observed.Hits Coverage)

| Seq                      | Charge | ObservedMS | ExpectedMS | CalculatedMS | Pepscore | PepHits |
|--------------------------|--------|------------|------------|--------------|----------|---------|
| LASVLNTEPALDSELTSK       | +2     | 944.50     | 1886.99    | 1886.98 0.01 | 49       | 1       |
| LAQDFLDSQNLSAYNTR        | +2     | 978.48     | 1954.94    | 1954.94 0    | 92       | 1       |
| VLLEAGEGLVTVPTTGSDGRPDAR | +3     | 837.77     | 2510.29    | 2510.30 0    | 47       | 2       |
| NVSLGNVLAVAYATK          | +2     | 760.43     | 1518.84    | 1518.84 0    | 61       | 2       |
| AGLLALEFYTPETANWR        | +2     | 976.50     | 1950.99    | 1950.98 0.01 | 69       | 1       |
| FPEDGPELEEVLTQLATADAQFWR | +3     | 921.45     | 2761.32    | 2761.32 0    | 85       | 1       |

No. 471. Protein IPI00197696 Matched (SEQUEST MASCOT) Y Y emPAI Strategy.Hits 0.46 2 PepMatched(SEQUEST MASCOT) 7 2 SpectraMatched(SEQUEST MASCOT) 22 6

\*Des:

Malate dehydrogenase, mitochondrial precursor

SEQUEST:(PepMatched Observed.Hits Coverage)

MASCOT:(PepMatched Observed.Hits Coverage)

| Seq                    | Charge | Xcor  | Delta | Probability | PepHits |
|------------------------|--------|-------|-------|-------------|---------|
| VNVPVIGGHAGK           | +2     | 3.396 | 0.570 | 0.9999      | 7       |
| AGAGSATLSMAYAGAR       | +2     | 5.124 | 0.573 | 1.0000      | 7       |
| MIAEAIPELK             | +2     | 2.777 | 0.269 | 0.9808      | 3       |
| LTLYDIAHTPGVAADLSHIETR | +3     | 5.411 | 0.627 | 1.0000      | 4       |
| IFGVTTLDIVR            | +2     | 3.730 | 0.395 | 0.9993      | 5       |
| FVFSLVDAMNGK           | +2     | 4.654 | 0.605 | 1.0000      | 5       |
| VAVLGASGGIGQPLSLLK     | +2     | 6.295 | 0.619 | 1.0000      | 3       |

  

| Seq              | Charge | ObservedMS | ExpectedMS | CalculatedMS   | Pepscore | PepHits |
|------------------|--------|------------|------------|----------------|----------|---------|
| VNVPVIGGHAGK     | +2     | 574.3422   | 1146.6698  | 1146.6509 0.02 | 38       | 2       |
| AGAGSATLSMAYAGAR | +2     | 727.8687   | 1453.7229  | 1453.6983 0.02 | 90       | 4       |

No. 472. Protein IPI00198498 Matched (SEQUEST MASCOT) Y Y emPAI Strategy.Hits 0.78 1 PepMatched(SEQUEST MASCOT) 6 3 SpectraMatched(SEQUEST MASCOT) 22 33

\*Des:

Cortactin isoform C

SEQUEST:(PepMatched Observed.Hits Coverage)

MASCOT:(PepMatched Observed.Hits Coverage)

| Seq           | Charge | Xcor  | Delta | Probability | PepHits |
|---------------|--------|-------|-------|-------------|---------|
| TEKHESQKDYVK  | +3     | 3.871 | 0.366 | 1.0000      | 14      |
| HCSQVDSVR     | +2     | 2.771 | 0.443 | 0.9998      | 17      |
| YGVQADRVDK    | +2     | 3.054 | 0.335 | 0.9982      | 9       |
| TEKHESQKDYSK  | +3     | 2.683 | 0.341 | 0.9991      | 9       |
| SAVGHEYQSK    | +2     | 2.871 | 0.462 | 0.9999      | 17      |
| MDKSAVGHEYQSK | +3     | 3.114 | 0.384 | 0.9999      | 6       |

  

| Seq | Charge | ObservedMS | ExpectedMS | CalculatedMS | Pepscore | PepHits |
|-----|--------|------------|------------|--------------|----------|---------|
|     |        |            |            |              |          |         |

Identified Human Platelet Proteins

|            |    |          |           |           |   |    |    |
|------------|----|----------|-----------|-----------|---|----|----|
| HCSQVDSVR  | +2 | 515.7419 | 1029.4692 | 1029.4662 | 0 | 51 | 37 |
| SAVGHEYQSK | +2 | 553.2659 | 1104.5172 | 1104.5199 | 0 | 52 | 37 |
| YGVQADRVDK | +2 | 575.7953 | 1149.5760 | 1149.5778 | 0 | 41 | 12 |

No. 473. Protein IPI0021358 Matched (SEQUEST MASCOT) Y Y emPAI Strategy.Hits 3.26 5 PepMatched(SEQUEST MASCOT) 10 11 SpectraMatched(SEQUEST MASCOT) 164 190

\*Des: Profilin-1

| SEQUEST:(PepMatched Observed.Hits Coverage) |        |            |            |              |           |        | 10       | 10      | 62.67% |
|---------------------------------------------|--------|------------|------------|--------------|-----------|--------|----------|---------|--------|
| Seq                                         | Charge | Xcor       | Delta      | Proability   | PepHits   |        |          |         |        |
| TFVSITPAEVGVLVGKDR                          |        |            | +2         | 4.760        | 0.494     | 1.0000 | 46       |         |        |
| DSLLQDGEFTMDLR                              | +2     |            | 5.382      | 0.553        | 1.0000    | 27     |          |         |        |
| TFVSITPAEVGVLVGK                            |        |            | +3         | 5.777        | 0.550     | 1.0000 | 22       |         |        |
| STGGAPTFNVTMTAK                             |        |            | +2         | 5.011        | 0.639     | 1.0000 | 71       |         |        |
| SSFFVNGLTLGGQK                              | +2     |            | 4.912      | 0.526        | 1.0000    | 26     |          |         |        |
| TLVLLMGK                                    |        | +2         | 2.937      | 0.352        | 0.9983    | 32     |          |         |        |
| TKSTGGAPTFNVTMTAK                           |        |            | +2         | 5.218        | 0.599     | 1.0000 | 9        |         |        |
| EGVHGGLINKK                                 |        | +2         | 3.020      | 0.273        | 0.9908    | 35     |          |         |        |
| TLVLLMGKEGVHGGLINKK                         |        | +3         | 4.724      | 0.443        | 1.0000    | 13     |          |         |        |
| TLVLLMGKEGVHGGLINK                          |        | +2         | 4.699      | 0.580        | 1.0000    | 3      |          |         |        |
| MASCOT:(PepMatched Observed.Hits Coverage)  |        |            |            |              |           |        | 11       | 13      | 62.67% |
| Seq                                         | Charge | ObservedMS | ExpectedMS | CalculatedMS |           |        | PepScore | PepHits |        |
| SSFFVNGLTLGGQK                              | +2     | 727.8906   | 1453.7666  | 1453.7565    | 0.01      | 94     | 28       |         |        |
| DSLLQDGEFTMDLR                              | +2     | 820.3915   | 1638.7685  | 1638.7559    | 0.01      | 94     | 40       |         |        |
| TFVSITPAEVGVLVGK                            |        | +2         | 808.9737   | 1615.9328    | 1615.9184 | 0.01   | 89       | 20      |        |
| TFVSITPAEVGVLVGKDR                          |        | +2         | 944.5361   | 1887.0576    | 1887.0465 | 0.01   | 104      | 47      |        |
| STGGAPTFNVTMTAK                             |        | +2         | 841.9318   | 1681.8490    | 1681.8345 | 0.01   | 93       | 70      |        |
| TLVLLMGK                                    |        | +2         | 437.7779   | 873.5412     | 873.5357  | 0.01   | 63       | 35      |        |
| EGVHGGLINK                                  |        | +2         | 512.2857   | 1022.5569    | 1022.5508 | 0.01   | 51       | 4       |        |
| TKSTGGAPTFNVTMTAK                           |        | +2         | 956.5057   | 1910.9969    | 1910.9771 | 0.02   | 97       | 9       |        |
| EGVHGGLINKK                                 |        | +2         | 575.7300   | 1149.4455    | 1150.6458 | -1.19  | 53       | 28      |        |
| TLVLLMGKEGVHGGLINKK                         |        | +2         | 1004.1013  | 2006.1880    | 2006.1709 | 0.02   | 80       | 14      |        |
| TLVLLMGKEGVHGGLINK                          |        | +2         | 940.0510   | 1878.0874    | 1878.0760 | 0.01   | 80       | 2       |        |

No. 474. Protein IPI00213644 Matched (SEQUEST MASCOT) Y Y emPAI Strategy.Hits 2.18 5 PepMatched(SEQUEST MASCOT) 6 8 SpectraMatched(SEQUEST MASCOT) 6 17

\*Des: Peptidyl-prolyl cis-trans isomerase B precursor

| SEQUEST:(PepMatched Observed.Hits Coverage) |        |            |            |              |         |   | 6        | 2       | 40.45% |
|---------------------------------------------|--------|------------|------------|--------------|---------|---|----------|---------|--------|
| Seq                                         | Charge | Xcor       | Delta      | Proability   | PepHits |   |          |         |        |
| HYGPGWVSMANAGK                              |        | +2         | 3.839      | 0.782        | 1.0000  | 1 |          |         |        |
| SIYGERFPDENFK                               |        | +2         | 3.171      | 0.624        | 0.9911  | 2 |          |         |        |
| SIYGERFPDENFKLK                             |        | +2         | 3.442      | 0.461        | 0.9661  | 1 |          |         |        |
| VIKDFMIQGGDFTRGDGTGGK                       |        | +2         | 4.891      | 0.561        | 0.9952  | 3 |          |         |        |
| HYGPGWVSMANAGKDTNGSQFFITTVK                 |        | +3         | 4.774      | 0.535        | 0.9989  | 2 |          |         |        |
| TSWLDGKHVVFGKVLEGM DVVR                     |        | +3         | 4.493      | 0.706        | 1.0000  | 3 |          |         |        |
| MASCOT:(PepMatched Observed.Hits Coverage)  |        |            |            |              |         |   | 8        | 5       | 50.45% |
| Seq                                         | Charge | ObservedMS | ExpectedMS | CalculatedMS |         |   | PepScore | PepHits |        |
| VLEGM DVVR                                  |        | +2         | 509.27     | 1016.53      | 1016.53 | 0 | 49       | 1       |        |

Identified Human Platelet Proteins

|                             |    |        |         |         |      |    |   |
|-----------------------------|----|--------|---------|---------|------|----|---|
| HYGPGWVSMANAGK              | +2 | 737.85 | 1473.69 | 1473.68 | 0.01 | 66 | 1 |
| TVDNFVALATGEK               | +2 | 683.58 | 1365.14 | 1363.70 | 1.44 | 61 | 2 |
| VIKDFMIQGGDFTR              | +2 | 813.92 | 1625.83 | 1625.82 | 0.01 | 76 | 2 |
| SIYGERFPDENFKLK             | +2 | 921.98 | 1841.94 | 1841.93 | 0.01 | 54 | 1 |
| HYGPGWVSMANAGKDTNGSQFFITTVK | +3 | 971.81 | 2912.40 | 2912.39 | 0.01 | 72 | 1 |
| VYFDFQIGDEPVGR              | +2 | 821.40 | 1640.79 | 1640.78 | 0.01 | 56 | 1 |
| TSWLDGKHVVFGKVLGMDVVR       | +3 | 824.78 | 2471.31 | 2471.30 | 0.01 | 48 | 1 |

|       |                                                                                    |                          |            |               |                            |                                |
|-------|------------------------------------------------------------------------------------|--------------------------|------------|---------------|----------------------------|--------------------------------|
| No.   | Protein                                                                            | Matched (SEQUEST MASCOT) | emPAI      | Strategy.Hits | PepMatched(SEQUEST MASCOT) | SpectraMatched(SEQUEST MASCOT) |
| 475.  | IPI00364286                                                                        | Y Y                      | 0.13       | 3             | 3 4 9 9                    |                                |
| *Des: | PREDICTED: similar to CCTeta, eta subunit of the chaperonin containing TCP-1 (CCT) |                          |            |               |                            |                                |
|       | SEQUEST:(PepMatched Observed.Hits Coverage)                                        |                          | 3          | 3             | 7.82%                      |                                |
|       | Seq                                                                                | Charge                   | Xcor       | Delta         | Probility                  | PepHits                        |
|       | INALTAASEAACLIVSVDETIKNPR                                                          |                          |            |               | +3                         | 4.773 0.536 1.0000 1           |
|       | MVVDVAVMMLDELLQLK                                                                  |                          |            |               | +3                         | 3.351 0.386 0.9999 7           |
|       | KVQGGALEESR                                                                        | +2                       | 3.187      |               | 0.336                      | 0.9972 2                       |
|       | MASCOT:(PepMatched Observed.Hits Coverage)                                         |                          | 4          | 3             | 7.11%                      |                                |
|       | Seq                                                                                | Charge                   | ObservedMS | ExpectedMS    | CalculatedMS               | Pepscore PepHits               |
|       | TATQLAVNK                                                                          | +2                       | 473.2740   | 944.5335      | 944.5291 0 54              | 4                              |
|       | MVVDVAVMMLDELLQLK                                                                  | +3                       |            | 616.6647      | 1846.9722 1846.9606 0.01   | 75 5                           |
|       | KVQGGALEESR                                                                        | +2                       | 587.3221   | 1172.6297     | 1172.6149 0.01             | 64 2                           |
|       | LLDVVHPPAAK                                                                        | +2                       | 531.8219   | 1061.6292     | 1061.6233 0.01             | 44 6                           |

|       |                                             |                          |            |               |                            |                                |
|-------|---------------------------------------------|--------------------------|------------|---------------|----------------------------|--------------------------------|
| No.   | Protein                                     | Matched (SEQUEST MASCOT) | emPAI      | Strategy.Hits | PepMatched(SEQUEST MASCOT) | SpectraMatched(SEQUEST MASCOT) |
| 476.  | IPI00211970                                 | Y Y                      | 1.33       | 1             | 5 6 7 12                   |                                |
| *Des: | Proteasome activator complex subunit 2      |                          |            |               |                            |                                |
|       | SEQUEST:(PepMatched Observed.Hits Coverage) |                          | 5          | 2             | 35.68%                     |                                |
|       | Seq                                         | Charge                   | Xcor       | Delta         | Probility                  | PepHits                        |
|       | TKVEAFQTAISK                                | +2                       | 3.189      |               | 0.526                      | 0.9954 1                       |
|       | IEDGNDFGVAIQEK                              | +2                       | 4.278      |               | 0.516                      | 0.9999 1                       |
|       | AFYAELHHIISNLEK                             | +3                       |            |               | 3.755                      | 0.563 1.0000 2                 |
|       | KIISLSQLLQEDSLNVADLSSLR                     |                          |            |               | +3                         | 4.431 0.540 0.9999 1           |
|       | LLALLALVKPEVWTLK                            | +2                       |            |               | 4.535                      | 0.494 0.9999 2                 |
|       | MASCOT:(PepMatched Observed.Hits Coverage)  |                          | 6          | 2             | 26.14%                     |                                |
|       | Seq                                         | Charge                   | ObservedMS | ExpectedMS    | CalculatedMS               | Pepscore PepHits               |
|       | DEAAYGALR                                   | +2                       | 483.24     | 964.47        | 964.46 0.01 58             | 2                              |
|       | VEAFQTAISK                                  | +2                       | 547.30     | 1092.59       | 1092.58 0.01 49            | 4                              |
|       | TKVEAFQTAISK                                | +2                       | 661.87     | 1321.74       | 1321.72 0.02 54            | 6                              |
|       | AMVLDLR                                     | +2                       | 409.24     | 816.46        | 816.45 0.01 55             | 1                              |
|       | IEDGNDFGVAIQEK                              | +2                       | 767.88     | 1533.74       | 1533.73 0.01 97            | 5                              |
|       | AFYAELHHIISNLEK                             | +3                       |            |               | 624.66                     | 1870.97 1870.96 0.01 43 1      |

|       |                                                                                                             |                          |       |               |                            |                                |
|-------|-------------------------------------------------------------------------------------------------------------|--------------------------|-------|---------------|----------------------------|--------------------------------|
| No.   | Protein                                                                                                     | Matched (SEQUEST MASCOT) | emPAI | Strategy.Hits | PepMatched(SEQUEST MASCOT) | SpectraMatched(SEQUEST MASCOT) |
| 477.  | IPI00192755                                                                                                 | Y Y                      | 3.71  | 1             | 4 4 6 4                    |                                |
| *Des: | PREDICTED: similar to ARP2/3 complex 21 kDa subunit (p21-ARC) (Actin-related protein 2/3 complex subunit 3) |                          |       |               |                            |                                |
|       | SEQUEST:(PepMatched Observed.Hits Coverage)                                                                 |                          | 4     | 1             | 57.8%                      |                                |
|       | Seq                                                                                                         | Charge                   | Xcor  | Delta         | Probility                  | PepHits                        |

Identified Human Platelet Proteins

|          |                                                     |                              |            |                 |                              |                                  |        |   |                  |
|----------|-----------------------------------------------------|------------------------------|------------|-----------------|------------------------------|----------------------------------|--------|---|------------------|
|          | ETKDTDIVDEAIYYFK                                    | +2                           | 4.048      | 0.535           | 0.9897                       | 1                                |        |   |                  |
|          | SQGEKEMYTLGITNFPIPGEPGFPLNAIYAK                     |                              |            | +3              | 5.861                        | 0.630                            | 1.0000 | 2 |                  |
|          | EMYTLGITNFPIPGEPGFPLNAIYAKPASK                      | +3                           | 5.219      | 0.686           | 1.0000                       | 2                                |        |   |                  |
|          | DTDIVDEAIYYFKANVFFK                                 | +2                           | 4.663      | 0.636           | 1.0000                       | 2                                |        |   |                  |
|          | MASCOT:(PepMatched Observed.Hits Coverage)          |                              | 4          | 1               | 17.91%                       |                                  |        |   |                  |
|          | Seq                                                 | Charge                       | ObservedMS | ExpectedMS      | CalculatedMS                 |                                  |        |   | PepScore PepHits |
|          | AYLQQLR+2                                           |                              | 446.26     | 890.50          | 890.50                       | 0                                | 41     | 1 |                  |
|          | AYLQQLRQETGLR                                       | +2                           | 788.43     | 1574.85         | 1574.85                      | 0                                | 41     | 1 |                  |
|          | DTDIVDEAIYYFK                                       | +2                           | 796.38     | 1590.75         | 1590.75                      | 0                                | 75     | 1 |                  |
|          | ETKDTDIVDEAIYYFK                                    | +2                           | 975.48     | 1948.94         | 1948.93                      | 0.01                             | 49     | 1 |                  |
| No. 478. | Protein IPI00563715                                 | Matched (SEQUENT MASCOT) N Y | emPAI 0.24 | Strategy.Hits 1 | PepMatched(SEQUEST MASCOT) 0 | SpectraMatched(SEQUEST MASCOT) 2 | 0      | 7 |                  |
| *Des:    | Protein                                             |                              |            |                 |                              |                                  |        |   |                  |
|          | SEQUENT:(PepMatched Observed.Hits Coverage)         |                              |            |                 |                              |                                  |        |   |                  |
|          | MASCOT:(PepMatched Observed.Hits Coverage)          |                              | 2          | 1               | 5.32%                        |                                  |        |   |                  |
|          | Seq                                                 | Charge                       | ObservedMS | ExpectedMS      | CalculatedMS                 |                                  |        |   | PepScore PepHits |
|          | NEISELNR                                            | +2                           | 487.27     | 972.52          | 973.48                       | -0.95                            | 41     | 2 |                  |
|          | LALDVEIATYR                                         | +2                           | 632.35     | 1262.69         | 1262.69                      | 0                                | 63     | 5 |                  |
| No. 479. | Protein IPI00475433                                 | Matched (SEQUENT MASCOT) N Y | emPAI 0.06 | Strategy.Hits 2 | PepMatched(SEQUEST MASCOT) 0 | SpectraMatched(SEQUEST MASCOT) 3 | 0      | 6 |                  |
| *Des:    | 106 kDa protein                                     |                              |            |                 |                              |                                  |        |   |                  |
|          | SEQUENT:(PepMatched Observed.Hits Coverage)         |                              |            |                 |                              |                                  |        |   |                  |
|          | MASCOT:(PepMatched Observed.Hits Coverage)          |                              | 3          | 2               | 6.92%                        |                                  |        |   |                  |
|          | Seq                                                 | Charge                       | ObservedMS | ExpectedMS      | CalculatedMS                 |                                  |        |   | PepScore PepHits |
|          | EVLEDFEAEDGEK                                       | +2                           | 690.8223   | 1379.6300       | 1379.6092                    | 0.02                             | 62     | 2 |                  |
|          | GNSSESIEAIREYEEFFQNSK                               | +3                           | 865.0737   | 2592.1994       | 2592.1615                    | 0.04                             | 36     | 2 |                  |
|          | SLIDMYSEVLDVLSYDASYNTQDHLPR                         | +3                           | 1087.1979  | 3258.5718       | 3258.5026                    | 0.07                             | 102    | 2 |                  |
| No. 480. | Protein IPI00210091                                 | Matched (SEQUENT MASCOT) Y Y | emPAI 0.3  | Strategy.Hits 1 | PepMatched(SEQUEST MASCOT) 2 | SpectraMatched(SEQUEST MASCOT) 3 | 4      | 3 |                  |
| *Des:    | PREDICTED: similar to serine protease inhibitor 2.4 |                              |            |                 |                              |                                  |        |   |                  |
|          | SEQUENT:(PepMatched Observed.Hits Coverage)         |                              | 2          | 1               | 6.8%                         |                                  |        |   |                  |
|          | Seq                                                 | Charge                       | Xcor       | Delta           | Proability                   | PepHits                          |        |   |                  |
|          | GNTLEEILEVLR                                        | +2                           | 3.180      | 0.331           | 0.9964                       | 3                                |        |   |                  |
|          | MQQVEASLQPETLKK                                     | +3                           | 3.370      | 0.409           | 1.0000                       | 2                                |        |   |                  |
|          | MASCOT:(PepMatched Observed.Hits Coverage)          |                              | 3          | 1               | 9.62%                        |                                  |        |   |                  |
|          | Seq                                                 | Charge                       | ObservedMS | ExpectedMS      | CalculatedMS                 |                                  |        |   | PepScore PepHits |
|          | GNTLEEILEVLR                                        | +2                           | 693.3901   | 1384.7656       | 1384.7561                    | 0.01                             | 46     | 1 |                  |
|          | IQELVSGLKER                                         | +2                           | 636.3744   | 1270.7342       | 1270.7244                    | 0.01                             | 57     | 1 |                  |
|          | MQQVEASLQPETLKK                                     | +2                           | 865.4678   | 1728.9210       | 1728.9080                    | 0.01                             | 74     | 2 |                  |
| No. 481. | Protein IPI00562915                                 | Matched (SEQUENT MASCOT) N Y | emPAI 2.24 | Strategy.Hits 1 | PepMatched(SEQUEST MASCOT) 0 | SpectraMatched(SEQUEST MASCOT) 2 | 0      | 6 |                  |
| *Des:    | PREDICTED: bridging integrator 2 (predicted)        |                              |            |                 |                              |                                  |        |   |                  |
|          | SEQUENT:(PepMatched Observed.Hits Coverage)         |                              |            |                 |                              |                                  |        |   |                  |



Identified Human Platelet Proteins

| No.   | Protein                                                              | Matched (SEQUEST MASCOT) | emPAI      | Strategy.Hits | PepMatched(SEQUEST MASCOT) | SpectraMatched(SEQUEST MASCOT) |
|-------|----------------------------------------------------------------------|--------------------------|------------|---------------|----------------------------|--------------------------------|
| 482.  | IPI00557083                                                          | N                        | Y          | 0.1           | 2                          | 0                              |
| *Des: | PREDICTED: similar to keratin 6 alpha                                |                          |            |               |                            |                                |
|       | SEQUEST:(PepMatched Observed.Hits Coverage)                          |                          |            |               |                            |                                |
|       | MASCOT:(PepMatched Observed.Hits Coverage)                           |                          |            |               |                            |                                |
|       | Seq                                                                  | Charge                   | ObservedMS | ExpectedMS    | CalculatedMS               | PepScore PepHits               |
|       | ASSDASSDPEPPETGEK                                                    | +2                       | 852.3667   | 1702.7188     | 1702.7169                  | 0 77 4                         |
|       | AIVGNNDLLWEDYEEK                                                     | +2                       | 954.4547   | 1906.8949     | 1906.8948                  | 0 108 2                        |
| 483.  | IPI00366104                                                          | Y                        | N          | 0.72          | 1                          | 3                              |
| *Des: | PREDICTED: similar to TOLLIP protein                                 |                          |            |               |                            |                                |
|       | SEQUEST:(PepMatched Observed.Hits Coverage)                          |                          |            |               |                            |                                |
|       | MASCOT:(PepMatched Observed.Hits Coverage)                           |                          |            |               |                            |                                |
|       | Seq                                                                  | Charge                   | Xcor       | Delta         | Proability                 | PepHits                        |
|       | YEELQITAGR                                                           | +2                       | 590.30     | 1178.59       | 1178.59                    | 0 53 2                         |
|       | SLDLDSIIAEVK                                                         | +2                       | 651.86     | 1301.71       | 1301.71                    | 0 61 4                         |
| 484.  | IPI00231502                                                          | Y                        | N          | 0.1           | 1                          | 3                              |
| *Des: | Splice Isoform 2 of Adapter-related protein complex 2 beta 1 subunit |                          |            |               |                            |                                |
|       | SEQUEST:(PepMatched Observed.Hits Coverage)                          |                          |            |               |                            |                                |
|       | MASCOT:(PepMatched Observed.Hits Coverage)                           |                          |            |               |                            |                                |
|       | Seq                                                                  | Charge                   | Xcor       | Delta         | Proability                 | PepHits                        |
|       | KPSETQELVQQVLSLATQDSDNPDLR                                           | +3                       | 4.188      | 0.445         | 0.9999                     | 2                              |
|       | APEVSQYIYQVYDSILK                                                    | +3                       | 3.367      | 0.352         | 0.9991                     | 1                              |
|       | LAPPLVTLLSGEPEVQYVALR                                                | +3                       | 3.645      | 0.481         | 0.9999                     | 1                              |
| 485.  | IPI00198717                                                          | Y                        | Y          | 0.55          | 3                          | 6                              |
| *Des: | Cytosolic malate dehydrogenase                                       |                          |            |               |                            |                                |
|       | SEQUEST:(PepMatched Observed.Hits Coverage)                          |                          |            |               |                            |                                |
|       | MASCOT:(PepMatched Observed.Hits Coverage)                           |                          |            |               |                            |                                |
|       | Seq                                                                  | Charge                   | Xcor       | Delta         | Proability                 | PepHits                        |
|       | GEFITTVQQR                                                           | +2                       | 3.401      | 0.397         | 0.9995                     | 2                              |
|       | NVIIWGNHSSTQYPDVNHAK                                                 | +3                       | 4.325      | 0.553         | 1.0000                     | 1                              |
|       | FVEGLPINDFSR                                                         | +2                       | 2.880      | 0.401         | 0.9979                     | 1                              |
|       | EVGVYEALKDDSWLK                                                      | +2                       | 3.708      | 0.367         | 0.9750                     | 1                              |
|       | DLDVAVLVGSMPR                                                        | +2                       | 2.988      | 0.389         | 0.9976                     | 1                              |
|       | VLVTGAAGQIAYSLLYSIGNGSVFGK                                           | +3                       | 5.489      | 0.629         | 1.0000                     | 1                              |
|       | MASCOT:(PepMatched Observed.Hits Coverage)                           |                          |            |               |                            |                                |
|       | Seq                                                                  | Charge                   | ObservedMS | ExpectedMS    | CalculatedMS               | PepScore PepHits               |
|       |                                                                      |                          | 4          | 3             | 18.82%                     |                                |

Identified Human Platelet Proteins

|                           |    |        |         |         |      |    |   |  |  |
|---------------------------|----|--------|---------|---------|------|----|---|--|--|
| LGVTADDVK                 | +2 | 459.25 | 916.49  | 916.49  | 0    | 44 | 1 |  |  |
| GEFITTVQQR                | +2 | 589.81 | 1177.61 | 1177.61 | 0    | 52 | 2 |  |  |
| EVGVYEALKDDSWLK           | +2 | 876.45 | 1750.89 | 1750.88 | 0.01 | 50 | 1 |  |  |
| VLVTGAAGQIAYSLLYSIGNSVFGK | +3 | 862.47 | 2584.40 | 2584.39 | 0.01 | 73 | 1 |  |  |

No. 486. Protein IPI00470282 Matched (SEQUEST MASCOT) Y Y emPAI Strategy.Hits 0.66 4 PepMatched(SEQUEST MASCOT) 9 SpectraMatched(SEQUEST MASCOT) 16 53

\*Des: Serine (Or cysteine) proteinase inhibitor, clade B (Ovalbumin), member 10

SEQUEST:(PepMatched Observed.Hits Coverage) 9 9 31.43%

| Seq                     | Charge | Xcor  | Delta | Proability | PepHits |  |  |  |
|-------------------------|--------|-------|-------|------------|---------|--|--|--|
| ANFSNMTSER              | +2     | 3.064 | 0.380 | 0.9985     | 4       |  |  |  |
| EINSWVGSQTGGK           | +2     | 4.230 | 0.547 | 1.0000     | 5       |  |  |  |
| DMGMTDAFNQGK            | +2     | 3.877 | 0.570 | 1.0000     | 4       |  |  |  |
| MEESYDLQSALR            | +2     | 3.851 | 0.400 | 0.9995     | 3       |  |  |  |
| TFLEINEEGTEAAAGTGSEVNFR | +3     | 4.244 | 0.601 | 1.0000     | 1       |  |  |  |
| KEINSWVGSQTGGK+2        | +2     | 3.831 | 0.327 | 0.9981     | 1       |  |  |  |
| GTAAQMSQVLHFGSIQDFK     | +2     | 4.750 | 0.598 | 1.0000     | 4       |  |  |  |
| GTWEHQFSVQNTTERPFR      | +2     | 3.339 | 0.527 | 0.9997     | 3       |  |  |  |
| NLFLSNVFK               | +2     | 3.225 | 0.282 | 0.9942     | 13      |  |  |  |

MASCOT:(PepMatched Observed.Hits Coverage) 9 9 28.71%

| Seq                 | Charge | ObservedMS | ExpectedMS | CalculatedMS | PepScore | PepHits |
|---------------------|--------|------------|------------|--------------|----------|---------|
| DMGMTDAFNQGK        | +2     | 657.7801   | 1313.5456  | 1313.5380    | 0.01     | 17      |
| MEESYDLQSALR        | +2     | 721.3415   | 1440.6684  | 1440.6555    | 0.01     | 9       |
| EINSWVGSQTGGK       | +2     | 681.8415   | 1361.6684  | 1361.6575    | 0.01     | 10      |
| ANFSNMTSER          | +2     | 578.8120   | 1155.6093  | 1155.4978    | 0.11     | 9       |
| KEINSWVGSQTGGK+2    | +2     | 745.8889   | 1489.7633  | 1489.7524    | 0.01     | 2       |
| GTAAQMSQVLHFGSIQDFK | +2     | 1083.5420  | 2165.0694  | 2165.0575    | 0.01     | 74      |
| TTSKPVQMMSMK        | +2     | 684.8411   | 1367.6677  | 1367.6611    | 0.01     | 3       |
| GTWEHQFSVQNTTERPFR  | +2     | 1110.5386  | 2219.0626  | 2219.0508    | 0.01     | 44      |
| NLFLSNVFK           | +2     | 609.8381   | 1217.6617  | 1217.6556    | 0.01     | 48      |

No. 487. Protein IPI00197770 Matched (SEQUEST MASCOT) Y Y emPAI Strategy.Hits 0.48 1 PepMatched(SEQUEST MASCOT) 8 SpectraMatched(SEQUEST MASCOT) 12 9

\*Des: Aldehyde dehydrogenase, mitochondrial precursor

SEQUEST:(PepMatched Observed.Hits Coverage) 8 3 24.43%

| Seq                           | Charge | Xcor  | Delta | Proability | PepHits |  |  |  |
|-------------------------------|--------|-------|-------|------------|---------|--|--|--|
| TEQGPQVDETQFK                 | +2     | 4.243 | 0.499 | 1.0000     | 2       |  |  |  |
| ELGEYGLQAYTEVK                | +2     | 2.998 | 0.315 | 0.9929     | 1       |  |  |  |
| YGLAAAVFTK                    | +2     | 2.789 | 0.376 | 0.9980     | 4       |  |  |  |
| AAQAAFQLGSPWR                 | +2     | 2.918 | 0.340 | 0.9952     | 1       |  |  |  |
| TFVQEDVYDEFVER                | +2     | 3.991 | 0.563 | 1.0000     | 4       |  |  |  |
| EEIFGPVMQILK                  | +2     | 3.198 | 0.201 | 0.9707     | 2       |  |  |  |
| VAEQTPLTALYVANLIK             | +2     | 4.273 | 0.568 | 1.0000     | 3       |  |  |  |
| TYLAALETLDNGKPYVISYLVLDLDMVLK | +3     | 5.260 | 0.398 | 0.9997     | 2       |  |  |  |

MASCOT:(PepMatched Observed.Hits Coverage) 5 3 13.63%

| Seq           | Charge | ObservedMS | ExpectedMS | CalculatedMS | PepScore | PepHits |
|---------------|--------|------------|------------|--------------|----------|---------|
| TEQGPQVDETQFK | +2     | 753.86     | 1505.71    | 1505.70      | 0.01     | 63      |

Identified Human Platelet Proteins

|                   |    |        |         |         |   |    |   |
|-------------------|----|--------|---------|---------|---|----|---|
| YGLAAVFTK         | +2 | 520.79 | 1039.57 | 1039.57 | 0 | 51 | 4 |
| AAQAAFQLGSPWR     | +2 | 701.87 | 1401.72 | 1401.72 | 0 | 51 | 1 |
| TFVQEDVYDEFVER    | +2 | 888.41 | 1774.80 | 1774.80 | 0 | 86 | 4 |
| VAEQTPLTALYVANLIK | +2 | 922.53 | 1843.05 | 1843.05 | 0 | 70 | 6 |

|          |                                             |                          |            |               |                            |                                |
|----------|---------------------------------------------|--------------------------|------------|---------------|----------------------------|--------------------------------|
| No. 488. | Protein                                     | Matched (SEQUEST MASCOT) | emPAI      | Strategy.Hits | PepMatched(SEQUEST MASCOT) | SpectraMatched(SEQUEST MASCOT) |
|          | IPI00188950                                 | Y Y                      | 0.18       | 1             | 4 4 6 6                    | 6                              |
| *Des:    | Tyrosine-protein kinase CSK                 |                          |            |               |                            |                                |
|          | SEQUEST:(PepMatched Observed.Hits Coverage) |                          | 4          | 1             | 12.22%                     |                                |
|          | Seq                                         | Charge                   | Xcor       | Delta         | Proability                 | PepHits                        |
|          | VMEGTVAAQDEFYR                              | +2                       | 3.829      | 0.552         | 1.0000                     | 1                              |
|          | GDVLTIVAVTK                                 | +2                       | 3.272      | 0.519         | 0.9999                     | 2                              |
|          | GGLYIVTEYMAK                                | +2                       | 2.930      | 0.351         | 0.9967                     | 1                              |
|          | HSNLVQLLGIVVEEK                             | +2                       | 4.851      | 0.440         | 0.9999                     | 2                              |
|          | MASCOT:(PepMatched Observed.Hits Coverage)  |                          | 4          | 1             | 11.57%                     |                                |
|          | Seq                                         | Charge                   | ObservedMS | ExpectedMS    | CalculatedMS               | Pepscore PepHits               |
|          | IPLKDVVPR                                   | +2                       | 518.83     | 1035.64       | 1035.64                    | 0 48 3                         |
|          | VMEGTVAAQDEFYR                              | +2                       | 808.38     | 1614.74       | 1614.73                    | 0.01 81 1                      |
|          | GDVLTIVAVTK                                 | +2                       | 558.34     | 1114.66       | 1114.66                    | 0 66 2                         |
|          | HSNLVQLLGIVVEEK                             | +2                       | 839.48     | 1676.95       | 1676.95                    | 0 92 2                         |

|          |                                             |                          |            |               |                            |                                |
|----------|---------------------------------------------|--------------------------|------------|---------------|----------------------------|--------------------------------|
| No. 489. | Protein                                     | Matched (SEQUEST MASCOT) | emPAI      | Strategy.Hits | PepMatched(SEQUEST MASCOT) | SpectraMatched(SEQUEST MASCOT) |
|          | IPI00199448                                 | Y Y                      | 0.15       | 1             | 2 2 5 3                    | 3                              |
| *Des:    | Mama                                        |                          |            |               |                            |                                |
|          | SEQUEST:(PepMatched Observed.Hits Coverage) |                          | 2          | 1             | 6.67%                      |                                |
|          | Seq                                         | Charge                   | Xcor       | Delta         | Proability                 | PepHits                        |
|          | TNPEAQALWQVVGSSVIMR                         | +3                       | 4.547      | 0.550         | 1.0000                     | 1                              |
|          | AVDQWSTATGASHGDVER                          | +2                       | 5.149      | 0.571         | 1.0000                     | 4                              |
|          | MASCOT:(PepMatched Observed.Hits Coverage)  |                          | 2          | 1             | 6.67%                      |                                |
|          | Seq                                         | Charge                   | ObservedMS | ExpectedMS    | CalculatedMS               | Pepscore PepHits               |
|          | AVDQWSTATGASHGDVER                          | +2                       | 943.94     | 1885.87       | 1885.86                    | 0.01 97 4                      |
|          | TNPEAQALWQVVGSSVIMR                         | +3                       | 696.03     | 2085.07       | 2085.07                    | 0 50 1                         |

|          |                                             |                          |            |               |                            |                                |
|----------|---------------------------------------------|--------------------------|------------|---------------|----------------------------|--------------------------------|
| No. 490. | Protein                                     | Matched (SEQUEST MASCOT) | emPAI      | Strategy.Hits | PepMatched(SEQUEST MASCOT) | SpectraMatched(SEQUEST MASCOT) |
|          | IPI00231506                                 | Y Y                      | 0.47       | 1             | 4 4 13 18                  | 18                             |
| *Des:    | Phosphoglycerate mutase 2                   |                          |            |               |                            |                                |
|          | SEQUEST:(PepMatched Observed.Hits Coverage) |                          | 4          | 1             | 16.34%                     |                                |
|          | Seq                                         | Charge                   | Xcor       | Delta         | Proability                 | PepHits                        |
|          | KAMEAVAAQGK                                 | +2                       | 3.543      | 0.442         | 0.9997                     | 3                              |
|          | HYGGLTGLNKAETAAK                            | +2                       | 4.553      | 0.555         | 1.0000                     | 8                              |
|          | VLIAAHGNSLR                                 | +2                       | 2.889      | 0.461         | 0.9992                     | 10                             |
|          | RVLIAAHGNSLR                                | +2                       | 2.950      | 0.332         | 0.9946                     | 1                              |
|          | MASCOT:(PepMatched Observed.Hits Coverage)  |                          | 4          | 1             | 15.95%                     |                                |
|          | Seq                                         | Charge                   | ObservedMS | ExpectedMS    | CalculatedMS               | Pepscore PepHits               |
|          | AMEAVAAQGK                                  | +2                       | 488.2533   | 974.4921      | 974.4855                   | 0.01 41 2                      |
|          | KAMEAVAAQGK                                 | +2                       | 552.3008   | 1102.5871     | 1102.5804                  | 0.01 79 3                      |
|          | VLIAAHGNSLR                                 | +2                       | 575.5364   | 1149.0583     | 1149.6618                  | -0.59 64 22                    |

Identified Human Platelet Proteins

HYGGLTGLNKAETAAK +2 815.9390 1629.8634 1629.8474 0.02 95 14

No. 491. Protein IPI00470288 Matched (SEQUEST MASCOT) Y Y emPAI 0.75 Strategy.Hits 3 PepMatched(SEQUEST MASCOT) 9 SpectraMatched(SEQUEST MASCOT) 8 20 14

\*Des: Creatine kinase, B chain

SEQUEST:(PepMatched Observed.Hits Coverage) 9 8 39.69%

| Seq                    | Charge | Xcor  | Delta | Proability | PepHits        |
|------------------------|--------|-------|-------|------------|----------------|
| FPAEDEFDLSHNNHMAK      | +2     |       | 4.693 | 0.473      | 0.9999 4       |
| LEQGQPDDLMPAQ          | +2     | 4.343 | 0.499 | 0.9998     | 2              |
| RGTGGVDTAAVGGVFDVSNADR |        |       | +3    | 5.050      | 0.580 1.0000 2 |
| TDLNPDNLQGDDLDPNYVLSR  |        |       | +2    | 5.341      | 0.648 1.0000 3 |
| LAVEALSSLDGDLGR        | +2     |       | 4.866 | 0.643      | 1.0000 2       |
| DLFDPIIEDR             | +2     | 3.111 | 0.320 | 0.9976     | 2              |
| HGGYQPSDEHK            | +2     | 3.092 | 0.370 | 0.9986     | 1              |
| TFLVWINEEDHLR          | +2     | 3.979 | 0.544 | 1.0000     | 4              |
| LGFSEVELVQMVVDGVK      | +2     |       | 5.581 | 0.370      | 0.9999 6       |

MASCOT:(PepMatched Observed.Hits Coverage) 8 8 30.67%

| Seq                    | Charge | ObservedMS | ExpectedMS | CalculatedMS | Pepscore | PepHits           |
|------------------------|--------|------------|------------|--------------|----------|-------------------|
| PFSNSHNTQK             | +2     | 580.28     | 1158.55    | 1158.54      | 0.01     | 41 1              |
| LEQGQPDDLMPAQK         | +2     |            | 841.93     | 1681.84      | 1681.83  | 0.01 64 2         |
| GTGGVDTAAVGGVFDVSNADR  |        |            | +2         | 982.97       | 1963.93  | 1963.92 0.01 87 2 |
| RGTGGVDTAAVGGVFDVSNADR |        |            | +3         | 707.68       | 2120.03  | 2120.02 0.01 61 1 |
| FPAEDEFDLSHNNHMAK      | +3     |            | 729.33     | 2184.96      | 2184.95  | 0.01 48 1         |
| LAVEALSSLDGDLGR        | +2     |            | 801.92     | 1601.83      | 1601.83  | 0 97 2            |
| TFLVWINEEDHLR          | +2     | 836.43     | 1670.85    | 1670.84      | 0.01     | 56 4              |
| LGFSEVELVQMVVDGVK      | +2     |            | 925.00     | 1847.98      | 1847.97  | 0.01 113 6        |

No. 492. Protein IPI00372458 Matched (SEQUEST MASCOT) Y Y emPAI 0.17 Strategy.Hits 1 PepMatched(SEQUEST MASCOT) 6 SpectraMatched(SEQUEST MASCOT) 5 8 6

\*Des: PREDICTED: similar to Coatomer protein complex subunit alpha

SEQUEST:(PepMatched Observed.Hits Coverage) 6 1 6.98%

| Seq             | Charge | Xcor | Delta | Proability | PepHits  |
|-----------------|--------|------|-------|------------|----------|
| LLELGPKEVAQQTR  | +3     |      | 3.670 | 0.532      | 1.0000 2 |
| LLHDQVGVVQFGPYK | +3     |      | 3.490 | 0.339      | 0.9995 1 |
| LVGQSIAYLQK     | +2     |      | 3.752 | 0.431      | 0.9997 1 |
| SILLSVPLLVDNK   | +2     |      | 2.709 | 0.457      | 0.9974 1 |
| LSFLYLITGNLEK   | +2     |      | 4.598 | 0.556      | 1.0000 1 |
| YAVTTGDHGIIR    | +2     |      | 3.297 | 0.383      | 0.9986 3 |

MASCOT:(PepMatched Observed.Hits Coverage) 5 1 5.22%

| Seq            | Charge | ObservedMS | ExpectedMS | CalculatedMS | Pepscore | PepHits   |
|----------------|--------|------------|------------|--------------|----------|-----------|
| YAVTTGDHGIIR   | +2     | 651.85     | 1301.68    | 1301.67      | 0.01     | 57 3      |
| LLELGPKEVAQQTR | +3     |            | 560.32     | 1677.94      | 1677.94  | 0 42 2    |
| TALNLFFK       | +2     |            | 477.28     | 952.54       | 952.54   | 0 66 1    |
| LVGQSIAYLQK    | +2     |            | 666.90     | 1331.79      | 1331.78  | 0.01 61 1 |
| LSFLYLITGNLEK  | +2     |            | 755.93     | 1509.85      | 1509.84  | 0.01 88 1 |

No. Protein Matched (SEQUEST MASCOT) emPAI Strategy.Hits PepMatched(SEQUEST MASCOT) SpectraMatched(SEQUEST MASCOT)

Identified Human Platelet Proteins

493. IPI00189759 Y Y 0.37 1 3 2 4 12

\*Des: NADH dehydrogenase 1 alpha subcomplex 10-like protein

SEQUEST:(PepMatched Observed.Hits Coverage) 3 1 13.29%  
 Seq Charge Xcor Delta Probility PepHits  
 VVEDIEYLNYNK +2 4.038 0.510 1.0000 2  
 YGLLASILGDK +2 2.674 0.482 0.9992 3  
 LLQYSDALEHLLSTGQGVVLER +3 3.610 0.337 0.9984 2

MASCOT:(PepMatched Observed.Hits Coverage) 2 1 6.92%  
 Seq Charge ObservedMS ExpectedMS CalculatedMS Pepscore PepHits  
 VVEDIEYLNYNK +2 749.88 1497.74 1497.74 0 79 6  
 YGLLASILGDK +2 575.33 1148.65 1148.64 0.01 66 6

No. Protein Matched (SEQUEST MASCOT) emPAI Strategy.Hits PepMatched(SEQUEST MASCOT) SpectraMatched(SEQUEST MASCOT)

494. IPI00358887 Y N 0.02 1 2 0 4 0

\*Des: PREDICTED: similar to hypothetical protein

SEQUEST:(PepMatched Observed.Hits Coverage) 2 1 1%  
 Seq Charge Xcor Delta Probility PepHits  
 NDMAALTAAGK +2 3.191 0.398 0.9995 4  
 HLIIGVSSDR +2 2.524 0.337 0.9936 4

MASCOT:(PepMatched Observed.Hits Coverage)

No. Protein Matched (SEQUEST MASCOT) emPAI Strategy.Hits PepMatched(SEQUEST MASCOT) SpectraMatched(SEQUEST MASCOT)

495. IPI00363493 N Y 0.25 1 0 6 0 10

\*Des: PREDICTED: maternal embryonic message 3

SEQUEST:(PepMatched Observed.Hits Coverage)  
 MASCOT:(PepMatched Observed.Hits Coverage) 6 1 11.23%  
 Seq Charge ObservedMS ExpectedMS CalculatedMS Pepscore PepHits  
 LSQLEGVNVER +2 622.34 1242.66 1242.66 0 56 2  
 SEDPDQYILINTAR +2 881.93 1761.85 1761.85 0 70 1  
 IPVDTYNNILTVLK +2 801.96 1601.91 1601.90 0.01 82 2  
 HFHPLFEYFDYESR +3 629.62 1885.84 1885.84 0 54 2  
 AQLAAITLIIGTFER +2 808.98 1615.94 1615.93 0.01 51 3  
 FTLPLLVFAAYQLAFR +2 927.52 1853.03 1853.02 0.01 67 3

No. Protein Matched (SEQUEST MASCOT) emPAI Strategy.Hits PepMatched(SEQUEST MASCOT) SpectraMatched(SEQUEST MASCOT)

496. IPI00372388 Y Y 0.14 1 2 6 5 10

\*Des: Chaperonin containing TCP1, subunit 3

SEQUEST:(PepMatched Observed.Hits Coverage) 2 1 4.5%  
 Seq Charge Xcor Delta Probility PepHits  
 KVQSGNINAAK +2 3.304 0.386 0.9989 3  
 GVMINKDVTHPR +2 3.456 0.444 0.9979 4  
 MASCOT:(PepMatched Observed.Hits Coverage) 6 1 12.97%  
 Seq Charge ObservedMS ExpectedMS CalculatedMS Pepscore PepHits  
 AVAQALEVIPR +2 583.8547 1165.6949 1165.6819 0.01 59 2  
 IVLLDSSLEYK +2 640.3636 1278.7126 1278.7071 0.01 42 1  
 TAVETAVLLLR +2 593.8602 1185.7059 1184.7128 0.99 50 1  
 KVQSGNINAAK +2 565.3233 1128.6321 1128.6251 0.01 75 3

Identified Human Platelet Proteins

|              |    |          |           |           |      |    |   |
|--------------|----|----------|-----------|-----------|------|----|---|
| EIQVQHAAK    | +2 | 560.8130 | 1119.6114 | 1119.6036 | 0.01 | 55 | 3 |
| GVMINKDVTHPR | +2 | 683.8702 | 1365.7259 | 1365.7187 | 0.01 | 66 | 3 |

|          |                                                             |                          |            |               |                            |                                |          |         |   |
|----------|-------------------------------------------------------------|--------------------------|------------|---------------|----------------------------|--------------------------------|----------|---------|---|
| No. 497. | Protein                                                     | Matched (SEQUEST MASCOT) | emPAI      | Strategy.Hits | PepMatched(SEQUEST MASCOT) | SpectraMatched(SEQUEST MASCOT) |          |         |   |
|          | IPI00231298                                                 | Y Y                      | 0.39       | 2             | 2 4 4                      | 4                              |          |         |   |
| *Des:    | Platelet-activating factor acetylhydrolase IB alpha subunit |                          |            |               |                            |                                |          |         |   |
|          | SEQUEST:(PepMatched Observed.Hits Coverage)                 |                          |            |               | 2                          | 6.25%                          |          |         |   |
|          | Seq                                                         | Charge                   | Xcor       | Delta         | Probility                  | PepHits                        |          |         |   |
|          | EAELDMNEELDKK                                               | +2                       |            | 3.744         | 0.370                      | 0.9997                         | 2        |         |   |
|          | VWDYETGDFER                                                 | +2                       |            | 3.825         | 0.537                      | 1.0000                         | 2        |         |   |
|          | MASCOT:(PepMatched Observed.Hits Coverage)                  |                          |            |               | 4                          | 16.58%                         |          |         |   |
|          | Seq                                                         | Charge                   | ObservedMS | ExpectedMS    | CalculatedMS               |                                | Pepscore | PepHits |   |
|          | TAPYVVTGSVDQTVK                                             | +2                       |            | 782.92        | 1563.82                    | 1563.81                        | 0.01     | 61      | 1 |
|          | LNEAKEEFTSGGPLGQK                                           | +2                       |            | 902.96        | 1803.91                    | 1803.90                        | 0.01     | 65      | 2 |
|          | TMHGHDHNVSSVAIMPNGDHIVSASR                                  | +3                       |            | 923.44        | 2767.28                    | 2768.29                        | -1       | 62      | 1 |
|          | AIADYLR                                                     | +2                       | 411.23     | 820.45        | 820.44                     | 0.01                           | 41       | 2       |   |

|          |                                             |                          |            |               |                            |                                |          |         |    |
|----------|---------------------------------------------|--------------------------|------------|---------------|----------------------------|--------------------------------|----------|---------|----|
| No. 498. | Protein                                     | Matched (SEQUEST MASCOT) | emPAI      | Strategy.Hits | PepMatched(SEQUEST MASCOT) | SpectraMatched(SEQUEST MASCOT) |          |         |    |
|          | IPI00193568                                 | Y Y                      | 0.1        | 2             | 5 3 6                      | 30                             |          |         |    |
| *Des:    | Splice Isoform 4 of Dynamin 1-like protein  |                          |            |               |                            |                                |          |         |    |
|          | SEQUEST:(PepMatched Observed.Hits Coverage) |                          |            |               | 5                          | 10.51%                         |          |         |    |
|          | Seq                                         | Charge                   | Xcor       | Delta         | Probility                  | PepHits                        |          |         |    |
|          | SSLLDDLLTESEDMAQR                           | +2                       |            | 4.426         | 0.462                      | 1.0000                         | 2        |         |    |
|          | LDLMDAGTDAMDVLMGR                           | +2                       |            | 4.083         | 0.530                      | 1.0000                         | 1        |         |    |
|          | IGDGGQEPTTGNWR                              | +2                       |            | 4.505         | 0.458                      | 1.0000                         | 1        |         |    |
|          | RLEEPSLR                                    | +2                       |            | 2.924         | 0.184                      | 0.9751                         | 1        |         |    |
|          | VFSPNVVNLTLVDLPGMTK                         | +2                       |            | 5.372         | 0.599                      | 1.0000                         | 1        |         |    |
|          | MASCOT:(PepMatched Observed.Hits Coverage)  |                          |            |               | 3                          | 7.22%                          |          |         |    |
|          | Seq                                         | Charge                   | ObservedMS | ExpectedMS    | CalculatedMS               |                                | Pepscore | PepHits |    |
|          | LDLMDAGTDAMDVLMGR                           | +2                       |            | 912.4384      | 1822.8622                  | 1822.8263                      | 0.04     | 104     | 6  |
|          | SSLLDDLLTESEDMAQR                           | +2                       |            | 961.9700      | 1921.9254                  | 1921.8939                      | 0.03     | 75      | 24 |
|          | LYTDFDEIRQEIENETER                          | +3                       |            | 767.3761      | 2299.1065                  | 2299.0604                      | 0.05     | 39      | 18 |

|          |                                             |                          |            |               |                            |                                |          |         |   |
|----------|---------------------------------------------|--------------------------|------------|---------------|----------------------------|--------------------------------|----------|---------|---|
| No. 499. | Protein                                     | Matched (SEQUEST MASCOT) | emPAI      | Strategy.Hits | PepMatched(SEQUEST MASCOT) | SpectraMatched(SEQUEST MASCOT) |          |         |   |
|          | IPI00205568                                 | Y Y                      | 0.26       | 1             | 2 2 2                      | 2                              |          |         |   |
| *Des:    | Kallistatin                                 |                          |            |               |                            |                                |          |         |   |
|          | SEQUEST:(PepMatched Observed.Hits Coverage) |                          |            |               | 2                          | 7.19%                          |          |         |   |
|          | Seq                                         | Charge                   | Xcor       | Delta         | Probility                  | PepHits                        |          |         |   |
|          | VSTDFYVDENTVVK                              | +2                       |            | 3.544         | 0.438                      | 0.9996                         | 1        |         |   |
|          | MVLVNYIFFQGLWK                              | +2                       |            | 3.964         | 0.536                      | 1.0000                         | 1        |         |   |
|          | MASCOT:(PepMatched Observed.Hits Coverage)  |                          |            |               | 2                          | 7.19%                          |          |         |   |
|          | Seq                                         | Charge                   | ObservedMS | ExpectedMS    | CalculatedMS               |                                | Pepscore | PepHits |   |
|          | VSTDFYVDENTVVK                              | +2                       |            | 851.91        | 1701.81                    | 1701.81                        | 0        | 49      | 1 |
|          | MVLVNYIFFQGLWK                              | +2                       |            | 879.48        | 1756.95                    | 1756.94                        | 0.01     | 86      | 1 |

|          |             |                          |       |               |                            |                                |  |  |
|----------|-------------|--------------------------|-------|---------------|----------------------------|--------------------------------|--|--|
| No. 500. | Protein     | Matched (SEQUEST MASCOT) | emPAI | Strategy.Hits | PepMatched(SEQUEST MASCOT) | SpectraMatched(SEQUEST MASCOT) |  |  |
|          | IPI00213587 | Y Y                      | 0.1   | 1             | 2 2 3                      | 3                              |  |  |

Identified Human Platelet Proteins

|       |                                                          |                          |              |               |                            |                                |        |          |         |  |
|-------|----------------------------------------------------------|--------------------------|--------------|---------------|----------------------------|--------------------------------|--------|----------|---------|--|
| *Des: | 26S protease regulatory subunit 8                        |                          |              |               |                            |                                |        |          |         |  |
|       | SEQUENT:(PepMatched Observed.Hits Coverage)              | 2                        | 1            | 8.95%         |                            |                                |        |          |         |  |
|       | Seq Charge Xcor Delta                                    | Probility                | PepHits      |               |                            |                                |        |          |         |  |
|       | EHAPSIIFMDEIDSIGSSR                                      | +3                       | 3.549        | 0.351         | 0.9998                     | 1                              |        |          |         |  |
|       | TMLELLNQLDGFTEATK                                        | +2                       | 4.410        | 0.499         | 1.0000                     | 3                              |        |          |         |  |
|       | MASCOT:(PepMatched Observed.Hits Coverage)               | 2                        | 1            | 8.95%         |                            |                                |        |          |         |  |
|       | Seq Charge ObservedMS                                    | ExpectedMS               | CalculatedMS |               |                            |                                |        | Pepscore | PepHits |  |
|       | TMLELLNQLDGFTEATK                                        | +2                       | 911.9831     | 1821.9516     | 1821.9182                  | 0.03                           | 62     | 2        |         |  |
|       | EHAPSIIFMDEIDSIGSSR                                      | +3                       | 702.0168     | 2103.0287     | 2102.9942                  | 0.03                           | 57     | 1        |         |  |
| No.   | Protein                                                  | Matched (SEQUENT MASCOT) | emPAI        | Strategy.Hits | PepMatched(SEQUENT MASCOT) | SpectraMatched(SEQUENT MASCOT) |        |          |         |  |
| 501.  | IPI00210319                                              | Y Y                      | 0.16         | 2             | 10                         | 2                              | 16     | 10       |         |  |
| *Des: | 98 kDa protein                                           |                          |              |               |                            |                                |        |          |         |  |
|       | SEQUENT:(PepMatched Observed.Hits Coverage)              | 10                       | 2            | 21.44%        |                            |                                |        |          |         |  |
|       | Seq Charge Xcor Delta                                    | Probility                | PepHits      |               |                            |                                |        |          |         |  |
|       | IEGSGDQVDTLELSGGAR                                       | +2                       | 4.819        | 0.538         | 1.0000                     | 1                              |        |          |         |  |
|       | VPVGDQPPDIEYQIK                                          | +2                       | 4.140        | 0.581         | 1.0000                     | 3                              |        |          |         |  |
|       | AGVYPEKDQAENEDGAQENTFSMDPQLER                            |                          |              | +3            | 5.867                      | 0.599                          | 1.0000 | 1        |         |  |
|       | AFIHHELLAYLYSSADQSSLMEESAEQAQR                           |                          |              | +3            | 7.267                      | 0.692                          | 1.0000 | 1        |         |  |
|       | ESSLILAVTPANMDLANS DALK                                  | +2                       | 4.899        | 0.614         | 1.0000                     | 1                              |        |          |         |  |
|       | DMILQFISR                                                | +2                       | 3.291        | 0.268         | 0.9972                     | 1                              |        |          |         |  |
|       | GWLTINNISLMK                                             | +2                       | 3.046        | 0.439         | 0.9993                     | 1                              |        |          |         |  |
|       | VYSPHVLNLTLDLPGITK                                       | +2                       | 5.069        | 0.643         | 1.0000                     | 4                              |        |          |         |  |
|       | ALLQMVQQFGVDFEK                                          | +2                       | 5.045        | 0.584         | 1.0000                     | 3                              |        |          |         |  |
|       | RPLILQLIFSK                                              | +3                       | 3.892        | 0.431         | 0.9999                     | 1                              |        |          |         |  |
|       | MASCOT:(PepMatched Observed.Hits Coverage)               | 2                        | 1            | 2.48%         |                            |                                |        |          |         |  |
|       | Seq Charge ObservedMS                                    | ExpectedMS               | CalculatedMS |               |                            |                                |        | Pepscore | PepHits |  |
|       | QEIEAETDR                                                | +2                       | 545.7620     | 1089.5094     | 1089.4938                  | 0.02                           | 35     | 5        |         |  |
|       | LDLMDEGTDAR                                              | +2                       | 618.2916     | 1234.5686     | 1234.5499                  | 0.02                           | 69     | 8        |         |  |
| No.   | Protein                                                  | Matched (SEQUENT MASCOT) | emPAI        | Strategy.Hits | PepMatched(SEQUENT MASCOT) | SpectraMatched(SEQUENT MASCOT) |        |          |         |  |
| 502.  | IPI00561114                                              | N Y                      | 0.51         | 1             | 0                          | 2                              | 0      | 8        |         |  |
| *Des: | PREDICTED: similar to Serine/threonine protein kinase 24 |                          |              |               |                            |                                |        |          |         |  |
|       | SEQUENT:(PepMatched Observed.Hits Coverage)              |                          |              |               |                            |                                |        |          |         |  |
|       | MASCOT:(PepMatched Observed.Hits Coverage)               | 2                        | 1            | 9.56%         |                            |                                |        |          |         |  |
|       | Seq Charge ObservedMS                                    | ExpectedMS               | CalculatedMS |               |                            |                                |        | Pepscore | PepHits |  |
|       | VLFLIPK                                                  | +2                       | 415.28       | 828.55        | 828.55                     | 0                              | 43     | 6        |         |  |
|       | ADIWSLGITAIELAK                                          | +2                       | 800.95       | 1599.89       | 1599.89                    | 0                              | 46     | 2        |         |  |
| No.   | Protein                                                  | Matched (SEQUENT MASCOT) | emPAI        | Strategy.Hits | PepMatched(SEQUENT MASCOT) | SpectraMatched(SEQUENT MASCOT) |        |          |         |  |
| 503.  | IPI00557167                                              | Y Y                      | 0.87         | 2             | 2                          | 2                              | 2      | 6        |         |  |
| *Des: | 13 kDa protein                                           |                          |              |               |                            |                                |        |          |         |  |
|       | SEQUENT:(PepMatched Observed.Hits Coverage)              | 2                        | 1            | 35.13%        |                            |                                |        |          |         |  |
|       | Seq Charge Xcor Delta                                    | Probility                | PepHits      |               |                            |                                |        |          |         |  |
|       | IEINFPAEYPFKPPK                                          | +3                       | 3.181        | 0.600         | 0.9995                     | 1                              |        |          |         |  |
|       | TDQVIQSLIALVNDPQPEHPLR                                   | +3                       | 5.243        | 0.533         | 0.9996                     | 1                              |        |          |         |  |
|       | MASCOT:(PepMatched Observed.Hits Coverage)               | 2                        | 1            | 10.81%        |                            |                                |        |          |         |  |

Identified Human Platelet Proteins

| Seq          | Charge | ObservedMS | ExpectedMS | CalculatedMS | Pepscore | PepHits |
|--------------|--------|------------|------------|--------------|----------|---------|
| ADLAE EYSK   | +2     | 513.2504   | 1024.4863  | 1024.4713    | 0.02     | 40      |
| ADLAE EYSKDR | +2     | 648.8171   | 1295.6197  | 1295.5993    | 0.02     | 41      |

No. 504. Protein IPI00198720 Matched (SEQUEST MASCOT) Y Y emPAI 1.15 Strategy.Hits 1 PepMatched(SEQUEST MASCOT) 6 CalculatedMS 6 SpectraMatched(SEQUEST MASCOT) 17

\*Des: NAD+-specific isocitrate dehydrogenase a-subunit

SEQUEST:(PepMatched Observed.Hits Coverage) 6 1 22.25%

| Seq                    | Charge | Xcor  | Delta | Proability | PepHits | Pepscore | PepHits |
|------------------------|--------|-------|-------|------------|---------|----------|---------|
| APIQWEER               | +2     | 3.030 | 0.366 | 0.9991     | 7       |          |         |
| MSDGLFLQK              | +2     | 2.709 | 0.371 | 0.9978     | 1       |          |         |
| TPYT D V N I V T I R   | +2     | 3.151 | 0.492 | 0.9997     | 2       |          |         |
| TPIAAGHPSM N L L L R   | +3     | 3.933 | 0.516 | 1.0000     | 3       |          |         |
| IAEFAFEYAR             | +2     | 3.988 | 0.503 | 1.0000     | 2       |          |         |
| ENTEGEYSGIEHVIDGVVQSIK | +3     | 4.605 | 0.469 | 1.0000     | 7       |          |         |

MASCOT:(PepMatched Observed.Hits Coverage) 6 1 22.25%

| Seq                    | Charge | ObservedMS | ExpectedMS | CalculatedMS | Pepscore | PepHits |
|------------------------|--------|------------|------------|--------------|----------|---------|
| APIQWEER               | +2     | 514.76     | 1027.51    | 1027.51      | 0        | 70      |
| MSDGLFLQK              | +2     | 519.77     | 1037.53    | 1037.52      | 0.01     | 45      |
| TPYT D V N I V T I R   | +2     | 696.38     | 1390.75    | 1390.75      | 0        | 67      |
| IAEFAFEYAR             | +2     | 608.81     | 1215.60    | 1215.59      | 0.01     | 75      |
| TPIAAGHPSM N L L L R   | +3     | 530.97     | 1589.88    | 1589.87      | 0.01     | 51      |
| ENTEGEYSGIEHVIDGVVQSIK | +3     | 834.76     | 2501.25    | 2501.23      | 0.02     | 64      |

No. 505. Protein IPI00366110 Matched (SEQUEST MASCOT) Y N emPAI 0.5 Strategy.Hits 1 PepMatched(SEQUEST MASCOT) 3 CalculatedMS 3 SpectraMatched(SEQUEST MASCOT) 0

\*Des: Nucleosome assembly protein 1-like 4

SEQUEST:(PepMatched Observed.Hits Coverage) 3 1 10.72%

| Seq               | Charge | Xcor  | Delta | Proability | PepHits | Pepscore | PepHits |
|-------------------|--------|-------|-------|------------|---------|----------|---------|
| LDNVSHTPSSYIETLPK | +3     | 3.130 | 0.472 | 0.9997     | 1       |          |         |
| QVPNESFFNFFSPLK   | +2     | 2.948 | 0.374 | 0.9965     | 1       |          |         |
| GIPEFWFTIFR       | +2     | 3.582 | 0.478 | 0.9999     | 1       |          |         |

MASCOT:(PepMatched Observed.Hits Coverage)

No. 506. Protein IPI00560245 Matched (SEQUEST MASCOT) N Y emPAI 0.35 Strategy.Hits 1 PepMatched(SEQUEST MASCOT) 0 CalculatedMS 2 SpectraMatched(SEQUEST MASCOT) 0

\*Des: 39 kDa protein

SEQUEST:(PepMatched Observed.Hits Coverage) 2 1 8.15%

| Seq                 | Charge | ObservedMS | ExpectedMS | CalculatedMS | Pepscore | PepHits |
|---------------------|--------|------------|------------|--------------|----------|---------|
| LGSQHSPGR           | +2     | 469.7465   | 937.4785   | 937.4729     | 0.01     | 54      |
| RMESSINHISQTVDIHKEK | +3     | 751.3903   | 2251.1489  | 2251.1379    | 0.01     | 46      |

No. 507. Protein IPI00331955 Matched (SEQUEST MASCOT) Y Y emPAI 0.85 Strategy.Hits 1 PepMatched(SEQUEST MASCOT) 5 CalculatedMS 6 SpectraMatched(SEQUEST MASCOT) 11

\*Des: Guanine nucleotide-binding protein G(z), alpha subunit

SEQUEST:(PepMatched Observed.Hits Coverage) 5 1 21.94%



Identified Human Platelet Proteins

| Seq                                         | Charge                                                             | Xcor                       | Delta      | Proability      | PepHits                      |                                   |          |         |    |
|---------------------------------------------|--------------------------------------------------------------------|----------------------------|------------|-----------------|------------------------------|-----------------------------------|----------|---------|----|
| GQNTYEEAAVYIQR                              | +3                                                                 |                            | 3.427      | 0.442           | 0.9999                       | 4                                 |          |         |    |
| GEITPELLGVMR                                | +2                                                                 |                            | 2.848      | 0.359           | 0.9965                       | 1                                 |          |         |    |
| AYDAVQLFALTGPAESK                           |                                                                    |                            | +2         | 4.750           | 0.506                        | 1.0000                            | 7        |         |    |
| EYKPLIYNAIDSLTR                             | +2                                                                 |                            | 3.010      | 0.370           | 0.9967                       | 2                                 |          |         |    |
| IAAPDYIPTVEDILR                             | +2                                                                 |                            | 3.045      | 0.409           | 0.9982                       | 3                                 |          |         |    |
| MASCOT:(PepMatched Observed.Hits Coverage)  |                                                                    |                            |            |                 |                              | 6                                 | 1        | 23.61%  |    |
| Seq                                         | Charge                                                             | ObservedMS                 | ExpectedMS | CalculatedMS    |                              |                                   | Pepscore | PepHits |    |
| DMTTGIVENK                                  | +2                                                                 | 554.27                     | 1106.53    | 1106.53         | 0                            | 42                                | 3        |         |    |
| LLLLGTSNSGK                                 | +2                                                                 | 551.83                     | 1101.65    | 1101.64         | 0.01                         | 51                                | 1        |         |    |
| GQNTYEEAAVYIQR                              | +2                                                                 | 821.40                     | 1640.79    | 1640.78         | 0.01                         | 63                                | 4        |         |    |
| GEITPELLGVMR                                | +2                                                                 | 657.86                     | 1313.71    | 1313.70         | 0.01                         | 56                                | 1        |         |    |
| AYDAVQLFALTGPAESK                           | +2                                                                 |                            | 890.97     | 1779.92         | 1779.90                      | 0.02                              | 106      | 8       |    |
| IAAPDYIPTVEDILR                             | +2                                                                 | 843.47                     | 1684.92    | 1684.90         | 0.02                         | 44                                | 2        |         |    |
| No. 508.                                    | Protein IPI00198723                                                | Matched (SEQUENT MASCOT) Y | emPAI 0.31 | Strategy.Hits 3 | PepMatched(SEQUEST MASCOT) 5 | SpectraMatched(SEQUEST MASCOT) 3  |          | 11      | 10 |
| *Des:                                       | Solute carrier family 2, facilitated glucose transporter, member 3 |                            |            |                 |                              |                                   |          |         |    |
| SEQUENT:(PepMatched Observed.Hits Coverage) |                                                                    |                            |            |                 |                              | 5                                 | 1        | 7.96%   |    |
| Seq                                         | Charge                                                             | Xcor                       | Delta      | Proability      | PepHits                      |                                   |          |         |    |
| EEDQATEILQR                                 | +2                                                                 |                            | 3.020      | 0.298           | 0.9808                       | 2                                 |          |         |    |
| KEEDQATEILQR                                | +2                                                                 |                            | 4.155      | 0.402           | 0.9994                       | 5                                 |          |         |    |
| GSAGVELNSMQPVKETPGNA                        | +2                                                                 |                            | 4.678      | 0.506           | 1.0000                       | 2                                 |          |         |    |
| GSAGVELNSMQPVKETPGN                         | +2                                                                 |                            | 5.204      | 0.532           | 1.0000                       | 1                                 |          |         |    |
| FLLINRKEEDQATEILQR                          | +3                                                                 |                            | 5.502      | 0.445           | 1.0000                       | 2                                 |          |         |    |
| MASCOT:(PepMatched Observed.Hits Coverage)  |                                                                    |                            |            |                 |                              | 3                                 | 5        | 4.18%   |    |
| Seq                                         | Charge                                                             | ObservedMS                 | ExpectedMS | CalculatedMS    |                              |                                   | Pepscore | PepHits |    |
| EEDQATEILQR                                 | +2                                                                 | 666.3331                   | 1330.6517  | 1330.6364       | 0.02                         | 50                                | 4        |         |    |
| TFEDITR                                     | +2                                                                 | 441.2256                   | 880.4367   | 880.4290        | 0.01                         | 44                                | 7        |         |    |
| KEEDQATEILQR                                | +2                                                                 | 730.3812                   | 1458.7479  | 1458.7314       | 0.02                         | 70                                | 5        |         |    |
| No. 509.                                    | Protein IPI00382226                                                | Matched (SEQUENT MASCOT) N | emPAI 0.08 | Strategy.Hits 2 | PepMatched(SEQUEST MASCOT) 0 | SpectraMatched(SEQUEST MASCOT) 4  |          | 0       | 46 |
| *Des:                                       | Ab2-162                                                            |                            |            |                 |                              |                                   |          |         |    |
| SEQUENT:(PepMatched Observed.Hits Coverage) |                                                                    |                            |            |                 |                              | 4                                 | 4        | 3.67%   |    |
| MASCOT:(PepMatched Observed.Hits Coverage)  |                                                                    |                            |            |                 |                              | 4                                 | 4        | 3.67%   |    |
| Seq                                         | Charge                                                             | ObservedMS                 | ExpectedMS | CalculatedMS    |                              |                                   | Pepscore | PepHits |    |
| MGNHLTNLR                                   | +2                                                                 | 528.2744                   | 1054.5342  | 1054.5342       | 0                            | 48                                | 4        |         |    |
| QNYSTEVEAAVNR                               | +2                                                                 | 740.8553                   | 1479.6961  | 1479.6953       | 0                            | 95                                | 17       |         |    |
| LVNLHLR                                     | +2                                                                 | 432.7741                   | 863.5337   | 863.5341        | 0                            | 52                                | 17       |         |    |
| NLNQALLDLHALGSAR                            | +2                                                                 |                            | 853.4705   | 1704.9265       | 1704.9271                    | 0                                 | 102      | 9       |    |
| No. 510.                                    | Protein IPI00382153                                                | Matched (SEQUENT MASCOT) Y | emPAI 0.08 | Strategy.Hits 1 | PepMatched(SEQUEST MASCOT) 5 | SpectraMatched(SEQUEST MASCOT) 10 |          | 6       | 20 |
| *Des:                                       | Keratin 5                                                          |                            |            |                 |                              |                                   |          |         |    |
| SEQUENT:(PepMatched Observed.Hits Coverage) |                                                                    |                            |            |                 |                              | 5                                 | 1        | 8.87%   |    |
| Seq                                         | Charge                                                             | Xcor                       | Delta      | Proability      | PepHits                      |                                   |          |         |    |

Identified Human Platelet Proteins

| Seq                                        | Charge | ObservedMS | ExpectedMS | CalculatedMS | PepScore | PepHits |
|--------------------------------------------|--------|------------|------------|--------------|----------|---------|
| YEELQQTAGR                                 | +2     | 3.285      | 0.441      | 1.0000       | 1        |         |
| SRTEAESWYQTK                               | +2     | 3.220      | 0.366      | 0.9961       | 1        |         |
| TTAENEFVMLKK                               | +2     | 3.242      | 0.293      | 0.9964       | 1        |         |
| SRTEAESWYQTKYEELQQTAGR                     | +3     | 6.013      | 0.529      | 1.0000       | 3        |         |
| VLDTKWTLLQEQQGTK                           | +2     | 3.667      | 0.501      | 1.0000       | 2        |         |
| MASCOT:(PepMatched Observed.Hits Coverage) |        | 10         | 1          | 17.57%       |          |         |
| Seq                                        | Charge | ObservedMS | ExpectedMS | CalculatedMS | PepScore | PepHits |
| NKYEDEINKR                                 | +3     | 436.8886   | 1307.6441  | 1307.6469    | 0        | 5       |
| YEELQQTAGR                                 | +2     | 597.7906   | 1193.5666  | 1193.5676    | 0        | 1       |
| SRTEAESWYQTK                               | +2     | 743.3524   | 1484.6903  | 1484.6895    | 0        | 1       |
| WTLLEQQGTK                                 | +2     | 602.3184   | 1202.6222  | 1202.6295    | 0        | 1       |
| LALDVEIATYRK                               | +2     | 696.3994   | 1390.7843  | 1390.7820    | 0        | 6       |
| TLNNKFASFIDK                               | +2     | 699.3791   | 1396.7437  | 1396.7350    | 0.01     | 1       |
| TTAENEFVMLKK                               | +2     | 705.8680   | 1409.7215  | 1409.7224    | 0        | 1       |
| VLDTKWTLLQEQQGTK                           | +2     | 880.4855   | 1758.9565  | 1758.9516    | 0        | 70      |
| LALDVEIATYR                                | +2     | 632.3504   | 1262.6863  | 1262.6870    | 0        | 2       |
| SLDLDSIIAEVK                               | +2     | 651.8602   | 1301.7058  | 1301.7078    | 0        | 16      |

No. 511. Protein IPI00373332 Matched (SEQUEST MASCOT) N Y emPAI Strategy.Hits 0.13 1 PepMatched(SEQUEST MASCOT) 0 SpectraMatched(SEQUEST MASCOT) 2 0 4

\*Des: PREDICTED: similar to coronin, actin binding protein, 2B

| Seq      | Charge | ObservedMS | ExpectedMS | CalculatedMS | PepScore | PepHits |
|----------|--------|------------|------------|--------------|----------|---------|
| QLQLELK  | +2     | 436.2636   | 870.5127   | 870.5174     | 0        | 2       |
| KLRVIEPR | +2     | 505.2683   | 1008.5220  | 1009.6396    | -1.11    | 43      |

No. 512. Protein IPI00367853 Matched (SEQUEST MASCOT) Y Y emPAI Strategy.Hits 0.15 2 PepMatched(SEQUEST MASCOT) 3 SpectraMatched(SEQUEST MASCOT) 3 3 8

\*Des: Guanylyl cyclase alpha 1 subunit

| Seq                                        | Charge | Xcor       | Delta      | Proability   | PepHits  |         |
|--------------------------------------------|--------|------------|------------|--------------|----------|---------|
| DVVLIGEQR                                  | +2     | 3.056      | 0.240      | 0.9888       | 1        |         |
| ATLEHAHQALEEEKKK                           | +3     | 3.164      | 0.191      | 0.9515       | 1        |         |
| GLYLSDIPIHNALR                             | +2     | 3.383      | 0.389      | 0.9985       | 1        |         |
| MASCOT:(PepMatched Observed.Hits Coverage) |        | 3          | 2          | 6.14%        |          |         |
| Seq                                        | Charge | ObservedMS | ExpectedMS | CalculatedMS | PepScore | PepHits |
| DVVLIGEQR                                  | +2     | 550.3119   | 1098.6092  | 1098.6033    | 0.01     | 45      |
| IIAEEAIAAGVPVEALK                          | +4     | 423.7500   | 1690.9709  | 1692.9661    | -1.99    | 44      |
| GLYLSDIPIHNALR                             | +2     | 791.4465   | 1580.8784  | 1580.8674    | 0.01     | 48      |

No. 513. Protein IPI00197780 Matched (SEQUEST MASCOT) Y Y emPAI Strategy.Hits 6.98 1 PepMatched(SEQUEST MASCOT) 5 SpectraMatched(SEQUEST MASCOT) 4 27 23

\*Des: CXC chemokine RTCK1

| Seq          | Charge | Xcor  | Delta | Proability | PepHits |
|--------------|--------|-------|-------|------------|---------|
| EVCLDPTAPMIK | +2     | 3.147 | 0.271 | 0.9910     | 3       |

Identified Human Platelet Proteins

| Seq                                        | Charge | ObservedMS | ExpectedMS | CalculatedMS | PepScore | PepHits          |
|--------------------------------------------|--------|------------|------------|--------------|----------|------------------|
| EVCLDPTAPMIKK                              | +2     | 3.781      | 0.366      | 0.9990       | 8        |                  |
| NGKEVCLDPTAPMIK                            | +2     | 3.932      | 0.484      | 0.9990       | 4        |                  |
| NGKEVCLDPTAPMIKK                           | +2     | 4.760      | 0.505      | 1.0000       | 9        |                  |
| VNVFRPGAHCNDNVEVIATLK                      | +3     | 5.815      | 0.545      | 1.0000       | 18       |                  |
| MASCOT:(PepMatched Observed.Hits Coverage) |        |            |            |              |          |                  |
| 4                                          | 2      |            |            |              | 33.62%   |                  |
| Seq                                        | Charge | ObservedMS | ExpectedMS | CalculatedMS |          | PepScore PepHits |
| NGKEVCLDPTAPMIK                            | +2     | 808.4218   | 1614.8290  | 1614.8109    | 0.02     | 46 4             |
| EVCLDPTAPMIKK                              | +2     | 722.8870   | 1443.7595  | 1443.7465    | 0.01     | 59 2             |
| NGKEVCLDPTAPMIKK                           | +2     | 872.4653   | 1742.9160  | 1742.9059    | 0.01     | 72 10            |
| VNVFRPGAHCNDNVEVIATLK                      | +2     | 1091.5842  | 2181.1539  | 2181.1364    | 0.02     | 91 23            |

No. 514. Protein IPI00189690 Matched (SEQUENT MASCOT) N Y emPAI 0.93 Strategy.Hits 2 PepMatched(SEQUEST MASCOT) 0 SpectraMatched(SEQUEST MASCOT) 5 0 33

\*Des: Ras-related protein Rab-8B

| Seq                                         | Charge | ObservedMS | ExpectedMS | CalculatedMS | PepScore | PepHits          |
|---------------------------------------------|--------|------------|------------|--------------|----------|------------------|
| SEQUENT:(PepMatched Observed.Hits Coverage) |        |            |            |              |          |                  |
| MASCOT:(PepMatched Observed.Hits Coverage)  |        |            |            |              |          |                  |
| 5                                           | 2      |            |            |              | 34.12%   |                  |
| Seq                                         | Charge | ObservedMS | ExpectedMS | CalculatedMS |          | PepScore PepHits |
| NIEEHASSDVER                                | +2     | 693.3734   | 1384.7322  | 1384.6218    | 0.11     | 48 2             |
| SSTNVEEAFFTLAR                              | +2     | 786.4533   | 1570.8920  | 1570.7627    | 0.13     | 62 1             |
| MNDSNSSGAGGPVKITESR                         | +3     | 636.3443   | 1906.0111  | 1905.8850    | 0.13     | 45 1             |
| LQIWDTAGQER                                 | +2     | 658.8831   | 1315.7516  | 1315.6520    | 0.1      | 67 21            |
| LLLIGDSGVGK                                 | +2     | 536.3587   | 1070.7028  | 1070.6335    | 0.07     | 63 9             |

No. 515. Protein IPI00400573 Matched (SEQUENT MASCOT) Y Y emPAI 0.59 Strategy.Hits 3 PepMatched(SEQUEST MASCOT) 3 SpectraMatched(SEQUEST MASCOT) 14 15 136

\*Des: Tubulin, beta2-like

| Seq                                         | Charge | Xcor       | Delta      | Probility    | PepHits | PepScore | PepHits |
|---------------------------------------------|--------|------------|------------|--------------|---------|----------|---------|
| SEQUENT:(PepMatched Observed.Hits Coverage) |        |            |            |              |         |          |         |
| MASCOT:(PepMatched Observed.Hits Coverage)  |        |            |            |              |         |          |         |
| 3                                           | 4      |            |            |              | 12.58%  |          |         |
| Seq                                         | Charge | Xcor       | Delta      | Probility    | PepHits |          |         |
| INVYYNEATGGK                                | +2     | 3.258      | 0.463      | 0.9996       | 2       |          |         |
| AVLVDLEPGTMDSVR                             | +2     | 4.525      | 0.430      | 0.9998       | 1       |          |         |
| FWEVISDEHGIDPTGTGTYHGSDQLER                 | +3     | 6.225      | 0.568      | 1.0000       | 3       |          |         |
| Seq                                         | Charge | ObservedMS | ExpectedMS | CalculatedMS |         | PepScore | PepHits |
| INVYYNEATGGK                                | +2     | 664.83     | 1327.64    | 1327.64      | 0       | 70       | 1       |
| EVDEQMLNVQNK                                | +2     | 723.85     | 1445.68    | 1445.68      | 0       | 71       | 18      |
| AVLVDLEPGTMDSVR                             | +2     | 801.42     | 1600.82    | 1600.81      | 0.01    | 65       | 1       |
| FPGQLNADLR                                  | +2     | 565.80     | 1129.59    | 1129.59      | 0       | 55       | 24      |
| IMNTFSVVPSPK                                | +2     | 660.36     | 1318.70    | 1318.70      | 0       | 81       | 6       |
| MSATFIGNSTAIQELFK                           | +2     | 929.48     | 1856.94    | 1856.93      | 0.01    | 93       | 6       |
| YLTVAAVFR                                   | +2     | 520.30     | 1038.59    | 1038.59      | 0       | 52       | 2       |
| LHFFMPGFAPLTSR                              | +3     | 540.95     | 1619.83    | 1619.83      | 0       | 62       | 12      |
| SGPFGQIFRPDNFVFGQSGAGNNWAK                  | +3     | 933.46     | 2797.35    | 2797.34      | 0.01    | 94       | 8       |
| ISEQFTAMFR                                  | +2     | 615.30     | 1228.59    | 1228.59      | 0       | 58       | 10      |
| LAVNMVPPFR                                  | +2     | 572.79     | 1143.57    | 1142.63      | 0.94    | 70       | 24      |
| ALTVPILTQQMFDAK                             | +3     | 564.63     | 1690.85    | 1690.86      | 0       | 60       | 9       |
| NSSYFVEWIPNNVK                              | +2     | 849.42     | 1696.82    | 1695.83      | 0.99    | 58       | 36      |
| GHYTEGAELVDSVLDVVR                          | +2     | 980.00     | 1957.98    | 1957.97      | 0.01    | 125      | 18      |

Identified Human Platelet Proteins

| No.   | Protein                                                | Matched (SEQUEST MASCOT) | emPAI      | Strategy.Hits | PepMatched(SEQUEST MASCOT) | SpectraMatched(SEQUEST MASCOT) |
|-------|--------------------------------------------------------|--------------------------|------------|---------------|----------------------------|--------------------------------|
| 516.  | IPI00371661                                            | Y Y                      | 0.2        | 1             | 4 4                        | 8 6                            |
| *Des: | PREDICTED: similar to Rho GTPase activating protein 18 |                          |            |               |                            |                                |
|       | SEQUEST:(PepMatched Observed.Hits Coverage) 4 1 9.74%  |                          |            |               |                            |                                |
|       | Seq                                                    | Charge                   | Xcor       | Delta         | Probility                  | PepHits                        |
|       | FLSQESGVAQTLK                                          | +2                       | 3.052      | 0.388         | 0.9983                     | 4                              |
|       | DSGLFGIPLTILLEQDQR                                     | +3                       | 5.193      | 0.540         | 1.0000                     | 3                              |
|       | EQLQALNLLVILLPDANR                                     | +3                       | 3.588      | 0.406         | 0.9998                     | 1                              |
|       | AANGADVPQGVIR                                          | +2                       | 2.755      | 0.339         | 0.9932                     | 3                              |
|       | MASCOT:(PepMatched Observed.Hits Coverage) 4 1 9.3%    |                          |            |               |                            |                                |
|       | Seq                                                    | Charge                   | ObservedMS | ExpectedMS    | CalculatedMS               | Pepscore PepHits               |
|       | GNDASLPSFR                                             | +2                       | 532.26     | 1062.51       | 1062.51                    | 0 47 1                         |
|       | FLSQESGVAQTLK                                          | +2                       | 704.38     | 1406.74       | 1406.74                    | 0 57 4                         |
|       | DSGLFGIPLTILLEQDQR                                     | +3                       | 672.37     | 2014.08       | 2014.07                    | 0.01 70 2                      |
|       | EQLQALNLLVILLPDANR                                     | +3                       | 678.40     | 2032.17       | 2032.17                    | 0 51 1                         |

| No.   | Protein                                                 | Matched (SEQUEST MASCOT) | emPAI      | Strategy.Hits | PepMatched(SEQUEST MASCOT) | SpectraMatched(SEQUEST MASCOT) |
|-------|---------------------------------------------------------|--------------------------|------------|---------------|----------------------------|--------------------------------|
| 517.  | IPI00569541                                             | N Y                      | 1.07       | 4             | 0 12                       | 0 70                           |
| *Des: | 67 kDa protein                                          |                          |            |               |                            |                                |
|       | SEQUEST:(PepMatched Observed.Hits Coverage) 12 4 25.38% |                          |            |               |                            |                                |
|       | MASCOT:(PepMatched Observed.Hits Coverage) 12 4 25.38%  |                          |            |               |                            |                                |
|       | Seq                                                     | Charge                   | ObservedMS | ExpectedMS    | CalculatedMS               | Pepscore PepHits               |
|       | ISQLEMAR                                                | +2                       | 474.25     | 946.49        | 946.49                     | 0 63 4                         |
|       | ESEAEWQVK                                               | +2                       | 632.28     | 1262.54       | 1262.54                    | 0 51 2                         |
|       | ALTSELANAR                                              | +2                       | 523.28     | 1044.55       | 1044.56                    | 0 59 20                        |
|       | AQMVQEDLEK                                              | +2                       | 595.79     | 1189.56       | 1189.56                    | 0 61 12                        |
|       | TQEQLASEMAELTAR                                         | +2                       | 839.41     | 1676.80       | 1676.80                    | 0 82 2                         |
|       | KTQEQLASEMAELTAR                                        | +2                       | 903.46     | 1804.91       | 1804.90                    | 0.01 116 2                     |
|       | GMLREDAVLEYLK                                           | +2                       | 768.91     | 1535.80       | 1535.80                    | 0 50 4                         |
|       | IAQDLEMYGVNYFSIK                                        | +2                       | 945.97     | 1889.92       | 1889.92                    | 0 95 8                         |
|       | IGFPWSEIR                                               | +2                       | 552.79     | 1103.57       | 1103.58                    | 0 42 20                        |
|       | APDFVYAPR                                               | +2                       | 591.80     | 1181.59       | 1181.59                    | 0 62 32                        |
|       | EVWFFGLQYQDTK                                           | +2                       | 830.90     | 1659.79       | 1659.79                    | 0 77 8                         |
|       | KGSELWLGVDALGLNIYEQNDR                                  | +3                       | 830.76     | 2489.26       | 2489.25                    | 0.01 44 8                      |

| No.   | Protein                                                 | Matched (SEQUEST MASCOT) | emPAI | Strategy.Hits | PepMatched(SEQUEST MASCOT) | SpectraMatched(SEQUEST MASCOT) |
|-------|---------------------------------------------------------|--------------------------|-------|---------------|----------------------------|--------------------------------|
| 518.  | IPI00372391                                             | Y Y                      | 0.25  | 4             | 11 14                      | 26 57                          |
| *Des: | Ac2-120                                                 |                          |       |               |                            |                                |
|       | SEQUEST:(PepMatched Observed.Hits Coverage) 11 10 7.29% |                          |       |               |                            |                                |
|       | Seq                                                     | Charge                   | Xcor  | Delta         | Probility                  | PepHits                        |
|       | ITNNNLNDSQR                                             | +2                       | 3.494 | 0.417         | 0.9995                     | 4                              |
|       | MYEQEWVR                                                | +2                       | 3.164 | 0.428         | 0.9996                     | 3                              |
|       | MPMGLSTGAISDSQIK                                        | +2                       | 5.046 | 0.521         | 1.0000                     | 5                              |
|       | FAPSEMDNEETDNTPK                                        | +2                       | 5.094 | 0.556         | 1.0000                     | 1                              |
|       | AEVDDVIQVR                                              | +2                       | 3.669 | 0.291         | 0.9707                     | 4                              |
|       | SWWGSYWEPSTAR                                           | +2                       | 2.838 | 0.298         | 0.9834                     | 2                              |

| Identified Human Platelet Proteins         |        |            |            |              |      |     |       |          |         |
|--------------------------------------------|--------|------------|------------|--------------|------|-----|-------|----------|---------|
| SSMVDKIFEGNSNTK                            | +2     | 4.154      | 0.537      | 1.0000       | 2    |     |       |          |         |
| ANNKQWLQIDLLK +3                           |        | 3.155      | 0.345      | 0.9993       | 4    |     |       |          |         |
| TFNPLVVVGLSR +2                            |        | 4.117      | 0.557      | 1.0000       | 6    |     |       |          |         |
| INTTGKPSNLPTFSR +2                         |        | 4.413      | 0.590      | 1.0000       | 4    |     |       |          |         |
| NKADKPLSIHPQGIR +3                         |        | 3.339      | 0.442      | 1.0000       | 2    |     |       |          |         |
| MASCOT:(PepMatched Observed.Hits Coverage) |        |            |            |              | 14   | 16  | 9.77% |          |         |
| Seq                                        | Charge | ObservedMS | ExpectedMS | CalculatedMS |      |     |       | Pepscore | PepHits |
| SWYIEDNINK                                 | +2     | 641.31     | 1280.61    | 1280.60      | 0.01 | 58  |       |          | 1       |
| AWVYSAVDVER                                | +2     | 729.36     | 1456.71    | 1456.70      | 0.01 | 82  |       |          | 2       |
| MPMGLSTGAISDSQIK                           | +2     | 818.41     | 1634.82    | 1634.80      | 0.02 | 100 |       |          | 2       |
| NFFNPPIISR                                 | +2     | 602.83     | 1203.65    | 1203.64      | 0.01 | 43  |       |          | 5       |
| TFNPLVVVGLSR +2                            |        | 651.39     | 1300.76    | 1300.75      | 0.01 | 70  |       |          | 5       |
| NPDTIAAWYLR                                | +2     | 660.35     | 1318.68    | 1318.67      | 0.01 | 77  |       |          | 2       |
| QHVLLFAVFDESK +3                           |        | 511.61     | 1531.81    | 1531.80      | 0.01 | 68  |       |          | 2       |
| TSPDLGQVLLSLDDK                            | +2     | 800.94     | 1599.86    | 1599.84      | 0.02 | 65  |       |          | 2       |
| SWWGSYWEPSLAR +2                           |        | 812.89     | 1623.76    | 1623.75      | 0.01 | 73  |       |          | 2       |
| DPQGEYEEHLGILGPVIR                         | +3     | 674.69     | 2021.04    | 2021.02      | 0.02 | 56  |       |          | 3       |
| SYSILYSDQGVSWKPYR                          | +3     | 683.68     | 2048.02    | 2048.00      | 0.02 | 62  |       |          | 1       |
| NSHEFYAINGMIYNLPGLR                        | +3     | 737.04     | 2208.09    | 2208.08      | 0.01 | 69  |       |          | 2       |
| EFVLLFMVFDEK +2                            |        | 758.90     | 1515.78    | 1515.77      | 0.01 | 98  |       |          | 3       |
| VADMEQEVVFAMFDENK                          | +3     | 667.97     | 2000.90    | 2000.89      | 0.01 | 51  |       |          | 4       |

No. 519. Protein IPI00208118 Matched (SEQUEST MASCOT) Y Y emPAI Strategy.Hits 0.79 4 14 14 27 28 PepMatched(SEQUEST MASCOT) SpectraMatched(SEQUEST MASCOT)

\*Des:

| Non-muscle caldesmon                        |        |            |            |              |         |    |        |          |         |
|---------------------------------------------|--------|------------|------------|--------------|---------|----|--------|----------|---------|
| SEQUEST:(PepMatched Observed.Hits Coverage) |        |            |            |              | 14      | 7  | 29.62% |          |         |
| Seq                                         | Charge | Xcor       | Delta      | Proability   | PepHits |    |        |          |         |
| VLEEEEQR                                    | +2     | 2.871      | 0.279      | 0.9944       | 1       |    |        |          |         |
| LEQYTNAIEGTK                                | +2     | 3.726      | 0.475      | 0.9998       | 3       |    |        |          |         |
| ASKPMKPAASDLPVPAEGVR                        | +3     | 4.083      | 0.234      | 0.9976       | 3       |    |        |          |         |
| MQNNSAENETAEGEEKGESR                        | +3     | 3.946      | 0.390      | 0.9999       | 3       |    |        |          |         |
| GETESEEFKLLK                                | +2     | 3.097      | 0.402      | 0.9931       | 1       |    |        |          |         |
| STHQAAVVS                                   | +2     | 3.210      | 0.550      | 1.0000       | 5       |    |        |          |         |
| RKVLEEEEQR                                  | +3     | 3.467      | 0.325      | 0.9997       | 2       |    |        |          |         |
| ASGDKEAEGAPQVEAGKR                          | +2     | 5.361      | 0.377      | 1.0000       | 4       |    |        |          |         |
| RMQNNSAENETAEGEEKGESR                       | +3     | 5.565      | 0.499      | 1.0000       | 2       |    |        |          |         |
| ASGDKEAEGAPQVEAGK                           | +3     | 3.394      | 0.398      | 0.9998       | 3       |    |        |          |         |
| GGNLGENQIKDEK                               | +2     | 3.149      | 0.302      | 0.9702       | 1       |    |        |          |         |
| RGETESEEFKLLK                               | +3     | 4.127      | 0.407      | 1.0000       | 2       |    |        |          |         |
| LKQTENAFSPSR                                | +3     | 3.255      | 0.390      | 0.9999       | 3       |    |        |          |         |
| GSVFSSPSASGTPNKETAGLK                       | +2     | 4.755      | 0.610      | 1.0000       | 7       |    |        |          |         |
| MASCOT:(PepMatched Observed.Hits Coverage)  |        |            |            |              | 14      | 8  | 29.07% |          |         |
| Seq                                         | Charge | ObservedMS | ExpectedMS | CalculatedMS |         |    |        | Pepscore | PepHits |
| KVLEEEEQR                                   | +2     | 580.3056   | 1158.5967  | 1158.5880    | 0.01    | 47 |        |          | 2       |
| QTENAFSPSR                                  | +2     | 568.7731   | 1135.5317  | 1135.5258    | 0.01    | 78 |        |          | 4       |
| GETESEEFKLLK                                | +2     | 713.3454   | 1424.6762  | 1424.6670    | 0.01    | 48 |        |          | 2       |
| LEQYTNAIEGTK                                | +2     | 683.8501   | 1365.6856  | 1365.6776    | 0.01    | 57 |        |          | 4       |

Identified Human Platelet Proteins

|                         |    |           |           |           |      |     |   |  |
|-------------------------|----|-----------|-----------|-----------|------|-----|---|--|
| STHQAAVSK               | +2 | 514.2839  | 1026.5533 | 1026.5458 | 0.01 | 51  | 3 |  |
| RKVLLEEEQR              | +3 | 439.2401  | 1314.6984 | 1314.6891 | 0.01 | 57  | 1 |  |
| ASGDKEAEGAPQVEAGK       | +2 | 822.3995  | 1642.7844 | 1642.7798 | 0    | 71  | 3 |  |
| ASGDKEAEGAPQVEAGKR      | +2 | 900.4596  | 1798.9046 | 1798.8809 | 0.02 | 92  | 5 |  |
| GSSLKIEER               | +2 | 509.7830  | 1017.5515 | 1017.5454 | 0.01 | 46  | 1 |  |
| RGETESEEFELK            | +3 | 527.9337  | 1580.7791 | 1580.7681 | 0.01 | 43  | 2 |  |
| LKQTENAFSPSR            | +2 | 689.3645  | 1376.7145 | 1376.7048 | 0.01 | 57  | 3 |  |
| GSVFSSPSASGTPNKETAGLK   | +2 | 1011.5184 | 2021.0223 | 2021.0065 | 0.02 | 108 | 5 |  |
| QKEFDPTITDGSLSVPSRR     | +3 | 711.7090  | 2132.1053 | 2132.0862 | 0.02 | 60  | 2 |  |
| SPDGNKSPAPKPSDLRPGDVSGK | +3 | 769.4000  | 2305.1782 | 2305.1662 | 0.01 | 47  | 1 |  |

|          |                                             |                          |            |               |                            |                                |
|----------|---------------------------------------------|--------------------------|------------|---------------|----------------------------|--------------------------------|
| No. 520. | Protein                                     | Matched (SEQUEST MASCOT) | emPAI      | Strategy.Hits | PepMatched(SEQUEST MASCOT) | SpectraMatched(SEQUEST MASCOT) |
|          | IPI00206443                                 | N Y                      | 0.17       | 2             | 0 3 0                      | 6                              |
| *Des:    | PREDICTED: similar to hypothetical protein  |                          |            |               |                            |                                |
|          | SEQUEST:(PepMatched Observed.Hits Coverage) |                          |            |               |                            |                                |
|          | MASCOT:(PepMatched Observed.Hits Coverage)  | 3                        | 2          | 8.36%         |                            |                                |
|          | Seq                                         | Charge                   | ObservedMS | ExpectedMS    | CalculatedMS               | Pepscore PepHits               |
|          | TSGQTSANAHSSR                               | +2                       | 652.3098   | 1302.6051     | 1302.5912 0.01             | 101 6                          |
|          | FTARPLVETIFER                               | +2                       | 789.9408   | 1577.8670     | 1577.8565 0.01             | 47 2                           |
|          | ARPSQLPEQSSSAQQNAR                          | +3                       | 652.3326   | 1953.9759     | 1953.9616 0.01             | 79 2                           |

|          |                                                     |                          |            |               |                            |                                |
|----------|-----------------------------------------------------|--------------------------|------------|---------------|----------------------------|--------------------------------|
| No. 521. | Protein                                             | Matched (SEQUEST MASCOT) | emPAI      | Strategy.Hits | PepMatched(SEQUEST MASCOT) | SpectraMatched(SEQUEST MASCOT) |
|          | IPI00192914                                         | Y Y                      | 0.05       | 2             | 7 6 9                      | 11                             |
| *Des:    | Sarcoplasmic/endoplasmic reticulum calcium ATPase 3 |                          |            |               |                            |                                |
|          | SEQUEST:(PepMatched Observed.Hits Coverage)         |                          |            |               |                            |                                |
|          | 7                                                   | 6                        | 8.83%      |               |                            |                                |
|          | Seq                                                 | Charge                   | Xcor       | Delta         | Proability                 | PepHits                        |
|          | LGIFGDTEVDLGGK                                      | +2                       | 2.850      | 0.424         | 0.9950                     | 3                              |
|          | AYTGREFDLDSPEQQR                                    | +2                       | 4.708      | 0.403         | 0.9977                     | 4                              |
|          | MNVFDTDLK                                           | +2                       | 2.790      | 0.391         | 0.9957                     | 2                              |
|          | SQMAAVEPER                                          | +2                       | 3.464      | 0.325         | 0.9964                     | 1                              |
|          | RLGIFGDTEVDLGGK                                     | +2                       | 4.044      | 0.299         | 0.9950                     | 2                              |
|          | QWGVVLQMSLPVILLDEALK                                | +2                       | 2.911      | 0.500         | 0.9983                     | 2                              |
|          | LHEFTISGTTYTPEGEVR                                  | +3                       | 3.863      | 0.511         | 1.0000                     | 2                              |
|          | MASCOT:(PepMatched Observed.Hits Coverage)          | 6                        | 4          | 5.98%         |                            |                                |
|          | Seq                                                 | Charge                   | ObservedMS | ExpectedMS    | CalculatedMS               | Pepscore PepHits               |
|          | LGIFGDTEVDLGGK                                      | +2                       | 682.3611   | 1362.7077     | 1362.7030 0                | 51 3                           |
|          | MNVFDTDLK                                           | +2                       | 541.7687   | 1081.5228     | 1081.5114 0.01             | 44 2                           |
|          | AYTGREFDLDSPEQQR                                    | +2                       | 956.4557   | 1910.8968     | 1910.8758 0.02             | 48 3                           |
|          | GAPESVIER                                           | +2                       | 479.2596   | 956.5047      | 956.4927 0.01              | 52 4                           |
|          | SQMAAVEPER                                          | +2                       | 559.2761   | 1116.5377     | 1116.5233 0.01             | 54 1                           |
|          | RLGIFGDTEVDLGGK                                     | +2                       | 760.4230   | 1518.8315     | 1518.8041 0.03             | 75 3                           |

|          |                                             |                          |        |               |                            |                                |
|----------|---------------------------------------------|--------------------------|--------|---------------|----------------------------|--------------------------------|
| No. 522. | Protein                                     | Matched (SEQUEST MASCOT) | emPAI  | Strategy.Hits | PepMatched(SEQUEST MASCOT) | SpectraMatched(SEQUEST MASCOT) |
|          | IPI00213735                                 | Y Y                      | 0.52   | 2             | 6 6 9                      | 17                             |
| *Des:    | Sideroflexin 1                              |                          |        |               |                            |                                |
|          | SEQUEST:(PepMatched Observed.Hits Coverage) |                          |        |               |                            |                                |
|          | 6                                           | 1                        | 36.58% |               |                            |                                |
|          | Seq                                         | Charge                   | Xcor   | Delta         | Proability                 | PepHits                        |

Identified Human Platelet Proteins

| Seq                                        | Charge | ObservedMS | ExpectedMS | CalculatedMS | Pepscore | PepHits |
|--------------------------------------------|--------|------------|------------|--------------|----------|---------|
| YAYDSAFHPDTGEK +2                          |        | 3.503      | 0.387      | 0.9989       | 2        |         |
| NILLTNEQLENAR +2                           |        | 4.378      | 0.483      | 1.0000       | 2        |         |
| QGIVPAGLTENELWR                            | +2     | 3.068      | 0.248      | 0.9768       | 1        |         |
| SSMSVTSLEDDLQASIQK                         | +2     | 4.791      | 0.537      | 1.0000       | 2        |         |
| ILMAAPGMAIPPFIMNTLEK                       | +2     | 3.288      | 0.495      | 0.9996       | 3        |         |
| SGDAPLTVNELGTAYVSATTGAVATALGLNALTK         | +3     | 4.801      | 0.643      | 1.0000       | 1        |         |
| MASCOT:(PepMatched Observed.Hits Coverage) |        |            |            |              |          |         |
|                                            |        | 6          | 2          | 29.26%       |          |         |
| Seq                                        | Charge | ObservedMS | ExpectedMS | CalculatedMS | Pepscore | PepHits |
| QAITQVVISR                                 | +2     | 557.83     | 1113.65    | 1113.65      | 0        | 51      |
| YAYDSAFHPDTGEK +2                          |        | 800.85     | 1599.69    | 1599.68      | 0.01     | 53      |
| NILLTNEQLENAR +2                           |        | 764.41     | 1526.81    | 1526.81      | 0        | 82      |
| QGIVPAGLTENELWR                            | +2     | 841.95     | 1681.89    | 1681.88      | 0.01     | 43      |
| SSMSVTSLEDDLQASIQK                         | +2     | 969.98     | 1937.94    | 1937.93      | 0.01     | 72      |
| ILMAAPGMAIPPFIMNTLEK                       | +3     | 720.06     | 2157.16    | 2157.14      | 0.02     | 48      |

No. 523. Protein IPI00214538 Matched (SEQUEST MASCOT) Y Y emPAI 0.45 Strategy.Hits 1 PepMatched(SEQUEST MASCOT) 5 SpectraMatched(SEQUEST MASCOT) 4 18 9

\*Des: Transforming growth factor beta 1 precursor

| Seq                                         | Charge | Xcor       | Delta      | Probility    | PepHits    |         |
|---------------------------------------------|--------|------------|------------|--------------|------------|---------|
| SEQUEST:(PepMatched Observed.Hits Coverage) |        |            |            |              |            |         |
|                                             |        |            |            |              | 5 1 20.9%  |         |
| STVEQHVELYQK                                | +2     | 4.288      | 0.456      | 1.0000       | 7          |         |
| VAGESADPEPEPEADYYAK                         | +2     | 5.953      | 0.622      | 1.0000       | 6          |         |
| DNLVHVEINGISPK                              | +2     | 3.433      | 0.351      | 0.9981       | 5          |         |
| QWLNQGDGIQGFR                               | +2     | 2.884      | 0.535      | 0.9997       | 2          |         |
| LLTPTDTPEWLSFDVTGVVR                        | +2     | 5.333      | 0.583      | 1.0000       | 2          |         |
| MASCOT:(PepMatched Observed.Hits Coverage)  |        |            |            |              |            |         |
|                                             |        |            |            |              | 4 1 15.86% |         |
| Seq                                         | Charge | ObservedMS | ExpectedMS | CalculatedMS | Pepscore   | PepHits |
| STVEQHVELYQK                                | +2     | 730.88     | 1459.74    | 1459.73      | 0.01       | 58      |
| DNLVHVEINGISPK                              | +2     | 768.41     | 1534.81    | 1533.82      | 0.99       | 75      |
| QWLNQGDGIQGFR                               | +2     | 759.88     | 1517.75    | 1517.74      | 0.01       | 54      |
| LLTPTDTPEWLSFDVTGVVR                        | +3     | 749.40     | 2245.19    | 2245.16      | 0.03       | 41      |

No. 524. Protein IPI00204843 Matched (SEQUEST MASCOT) Y N emPAI 0.22 Strategy.Hits 1 PepMatched(SEQUEST MASCOT) 2 SpectraMatched(SEQUEST MASCOT) 0 4 0

\*Des: Guanine nucleotide-binding protein G(o), alpha subunit 2

| Seq                                         | Charge | Xcor  | Delta | Probility | PepHits   |
|---------------------------------------------|--------|-------|-------|-----------|-----------|
| SEQUEST:(PepMatched Observed.Hits Coverage) |        |       |       |           |           |
|                                             |        |       |       |           | 2 1 7.52% |
| TTGIVETHFTFK                                | +2     | 3.595 | 0.447 | 0.9997    | 3         |
| WFTDTSILFLNK                                | +2     | 2.886 | 0.400 | 0.9955    | 2         |
| MASCOT:(PepMatched Observed.Hits Coverage)  |        |       |       |           |           |

No. 525. Protein IPI00566208 Matched (SEQUEST MASCOT) N Y emPAI 0.62 Strategy.Hits 2 PepMatched(SEQUEST MASCOT) 0 SpectraMatched(SEQUEST MASCOT) 2 0 4

\*Des: 14 kDa protein

| Seq                                         | Charge | ObservedMS | ExpectedMS | CalculatedMS | Pepscore | PepHits    |
|---------------------------------------------|--------|------------|------------|--------------|----------|------------|
| SEQUEST:(PepMatched Observed.Hits Coverage) |        |            |            |              |          |            |
| MASCOT:(PepMatched Observed.Hits Coverage)  |        |            |            |              |          |            |
|                                             |        |            |            |              |          | 2 2 21.64% |

Identified Human Platelet Proteins

|                  |    |        |         |         |   |    |   |
|------------------|----|--------|---------|---------|---|----|---|
| GPSYGLSAEVK      | +2 | 554.29 | 1106.56 | 1106.56 | 0 | 49 | 8 |
| SMQNWHLLENLSNFIK | +2 | 994.99 | 1987.96 | 1987.96 | 0 | 64 | 2 |

No. 526. Protein IPI00211128 Matched (SEQUEST MASCOT) Y N emPAI 1.04 Strategy.Hits 1 PepMatched (SEQUEST MASCOT) 2 SpectraMatched (SEQUEST MASCOT) 0  
 \*Des: Peripheral-type benzodiazepine receptor  
 SEQUEST:(PepMatched Observed.Hits Coverage) 2 1 27.9%  
 Seq Charge Xcor Delta Probility PepHits  
 QMGWALVDLMLVSGVATATTLAWHR +3 5.545 0.709 1.0000 1  
 LLYPYLAWLAFATMLNYYVWR +3 4.288 0.602 0.9998 1  
 MASCOT:(PepMatched Observed.Hits Coverage)

No. 527. Protein IPI00212794 Matched (SEQUEST MASCOT) N Y emPAI 0.33 Strategy.Hits 1 PepMatched (SEQUEST MASCOT) 0 SpectraMatched (SEQUEST MASCOT) 2  
 \*Des: Ras-related protein Rab-27A  
 SEQUEST:(PepMatched Observed.Hits Coverage)  
 MASCOT:(PepMatched Observed.Hits Coverage) 2 1 10.22%  
 Seq Charge ObservedMS ExpectedMS CalculatedMS Pepscore PepHits  
 TSVLYQYTDGK +2 637.82 1273.63 1273.62 0.01 70 2  
 FITTVGIDFR +2 584.83 1167.64 1167.63 0.01 54 8

No. 528. Protein IPI00326412 Matched (SEQUEST MASCOT) Y N emPAI 0.14 Strategy.Hits 1 PepMatched (SEQUEST MASCOT) 2 SpectraMatched (SEQUEST MASCOT) 0  
 \*Des: Gamma enolase  
 SEQUEST:(PepMatched Observed.Hits Coverage) 2 1 7.7%  
 Seq Charge Xcor Delta Probility PepHits  
 LGAEVYHTLK +2 2.996 0.426 0.9998 10  
 SGETEDTFIADLVVGLCTGQIK +2 3.267 0.417 0.9997 13  
 MASCOT:(PepMatched Observed.Hits Coverage)

No. 529. Protein IPI00202235 Matched (SEQUEST MASCOT) N Y emPAI 0.28 Strategy.Hits 1 PepMatched (SEQUEST MASCOT) 0 SpectraMatched (SEQUEST MASCOT) 2  
 \*Des: Hypertrophied skeletal muscle protein FHL1c  
 SEQUEST:(PepMatched Observed.Hits Coverage)  
 MASCOT:(PepMatched Observed.Hits Coverage) 2 1 11.68%  
 Seq Charge ObservedMS ExpectedMS CalculatedMS Pepscore PepHits  
 QVIGTGSFFPK +2 590.8633 1179.7120 1179.6288 0.08 34 3  
 AIVAGDQNVEYK +2 653.8860 1305.7574 1305.6564 0.1 58 6

No. 530. Protein IPI00327144 Matched (SEQUEST MASCOT) Y Y emPAI 1.7 Strategy.Hits 4 PepMatched (SEQUEST MASCOT) 6 SpectraMatched (SEQUEST MASCOT) 40  
 \*Des: Cofilin-1  
 SEQUEST:(PepMatched Observed.Hits Coverage) 6 9 38.52%  
 Seq Charge Xcor Delta Probility PepHits  
 YALYDATYETK +2 3.688 0.728 1.0000 5  
 LGGSAVISLEGKP +3 3.861 0.514 0.9981 6  
 EILVGDVGQTVDDPYTTFVK +2 6.275 0.508 1.0000 2



Identified Human Platelet Proteins

| MIYASSKDAIKK                               | +2     | 3.501      | 0.521      | 0.9861       | 1         |      |          |         |
|--------------------------------------------|--------|------------|------------|--------------|-----------|------|----------|---------|
| NIILEEGKEILVGDVGQTVDDPYTTFVK               | +3     |            | 6.928      | 0.774        | 1.0000    | 3    |          |         |
| ESKKEDLVFIFWAPESAPLK                       | +2     |            | 5.762      | 0.642        | 1.0000    | 4    |          |         |
| MASCOT:(PepMatched Observed.Hits Coverage) |        |            |            |              |           |      |          |         |
| Seq                                        | Charge | ObservedMS | ExpectedMS | CalculatedMS |           |      | PepScore | PepHits |
| YALYDATYETK                                | +2     | 669.3281   | 1336.6417  | 1336.6187    | 0.02      | 39   | 3        |         |
| HELQANCYEEVKDR                             | +3     | 578.6116   | 1732.8129  | 1732.7838    | 0.03      | 56   | 2        |         |
| EDLVFIFWAPESAPLK                           | +2     |            | 931.5083   | 1861.0021    | 1860.9661 | 0.04 | 70       | 3       |
| EILVGDVGQTVDDPYTTFVK                       | +2     |            | 1098.5762  | 2195.1378    | 2195.0997 | 0.04 | 133      | 2       |
| NIILEEGKEILVGDVGQTVDDPYTTFVK               | +3     |            | 1031.5618  | 3091.6635    | 3091.5964 | 0.07 | 96       | 3       |
| KEDLVFIFWAPESAPLK                          | +2     |            | 995.5567   | 1989.0989    | 1989.0611 | 0.04 | 88       | 7       |

No. 531. Protein IPI00324741 Matched (SEQUEST MASCOT) Y Y emPAI Strategy.Hits 0.41 3 PepMatched(SEQUEST MASCOT) 11 9 SpectraMatched(SEQUEST MASCOT) 22 25  
 \*Des: Protein disulfide-isomerase A3 precursor

| SEQUEST:(PepMatched Observed.Hits Coverage) |        |            |            |              |           |      |          |         |
|---------------------------------------------|--------|------------|------------|--------------|-----------|------|----------|---------|
| Seq                                         | Charge | Xcor       | Delta      | Probability  | PepHits   |      |          |         |
| VDCTANTNTCNK                                | +2     |            | 4.156      | 0.470        | 1.0000    | 4    |          |         |
| LAPEYAAAATR                                 | +2     |            | 3.383      | 0.358        | 0.9986    | 5    |          |         |
| DLLTAYYDVDYKNTK                             | +2     |            | 4.635      | 0.585        | 1.0000    | 2    |          |         |
| FVMQEEFSR                                   | +2     |            | 2.903      | 0.460        | 0.9995    | 2    |          |         |
| DLFSDGHSEFLK                                | +2     |            | 2.766      | 0.248        | 0.9743    | 3    |          |         |
| FLQEYFDGNLKR                                | +2     |            | 3.935      | 0.452        | 0.9998    | 4    |          |         |
| KTFSHLSDFGLESTTGEIPVVAIR                    | +3     |            | 4.155      | 0.514        | 1.0000    | 1    |          |         |
| LSKDPNIVIAK                                 | +3     |            | 3.942      | 0.262        | 0.9871    | 4    |          |         |
| FISDKDASVVGFFR                              | +2     |            | 4.285      | 0.589        | 1.0000    | 3    |          |         |
| TADGIVSHLKK                                 | +2     |            | 3.314      | 0.454        | 0.9996    | 3    |          |         |
| TFLDAGHKLNFVAVSR                            | +2     |            | 3.948      | 0.547        | 1.0000    | 1    |          |         |
| MASCOT:(PepMatched Observed.Hits Coverage)  |        |            |            |              |           |      |          |         |
| Seq                                         | Charge | ObservedMS | ExpectedMS | CalculatedMS |           |      | PepScore | PepHits |
| LNFVAVSR                                    | +2     | 439.2564   | 876.4983   | 876.4817     | 0.02      | 55   | 2        |         |
| YGVSGYPTLK                                  | +2     | 542.7959   | 1083.5772  | 1083.5600    | 0.02      | 39   | 1        |         |
| LSKDPNIVIAK                                 | +2     | 599.3733   | 1196.7320  | 1196.7128    | 0.02      | 58   | 2        |         |
| DGEEAGAYDGPR                                | +2     | 618.7710   | 1235.5274  | 1235.5054    | 0.02      | 52   | 4        |         |
| SEPIPETNEGPVK                               | +2     | 698.8635   | 1395.7124  | 1395.6881    | 0.02      | 36   | 1        |         |
| ELNDFISYLQR                                 | +2     | 699.3677   | 1396.7209  | 1396.6986    | 0.02      | 66   | 2        |         |
| DLLTAYYDVDYK                                | +2     | 804.3920   | 1606.7695  | 1606.7402    | 0.03      | 72   | 4        |         |
| MDATANDVPSPYEVK                             | +2     |            | 818.8954   | 1635.7762    | 1635.7450 | 0.03 | 59       | 2       |
| EYDDNGEGITIFRPLHLANKFEDK                    | +3     |            | 941.1477   | 2820.4213    | 2820.3718 | 0.05 | 54       | 2       |

No. 532. Protein IPI00367930 Matched (SEQUEST MASCOT) N Y emPAI Strategy.Hits 0.14 1 PepMatched(SEQUEST MASCOT) 0 2 SpectraMatched(SEQUEST MASCOT) 0 3  
 \*Des: PREDICTED: similar to Erbb2 interacting protein isoform 2

| SEQUEST:(PepMatched Observed.Hits Coverage) |        |            |            |              |      |    |          |         |
|---------------------------------------------|--------|------------|------------|--------------|------|----|----------|---------|
| MASCOT:(PepMatched Observed.Hits Coverage)  |        |            |            |              |      |    |          |         |
| Seq                                         | Charge | ObservedMS | ExpectedMS | CalculatedMS |      |    | PepScore | PepHits |
| MVLTNMFPPQQR                                | +2     | 812.91     | 1623.80    | 1623.79      | 0.01 | 41 | 2        |         |

Identified Human Platelet Proteins

| No.   | Protein                                                                                          | Matched (SEQUEST MASCOT) | emPAI      | Strategy.Hits | PepMatched(SEQUEST MASCOT) | SpectraMatched(SEQUEST MASCOT) |
|-------|--------------------------------------------------------------------------------------------------|--------------------------|------------|---------------|----------------------------|--------------------------------|
| 533.  | IPI00392935                                                                                      | Y Y                      | 3.06       | 5             | 5                          | 173                            |
| *Des: | 17 kDa protein                                                                                   |                          |            |               |                            |                                |
|       | SEQUEST:(PepMatched Observed.Hits Coverage)                                                      |                          | 5          | 4             | 45.75%                     |                                |
|       | Seq                                                                                              | Charge Xcor              | Delta      | Probility     | PepHits                    |                                |
|       | NKDQGTIEDYVEGLR                                                                                  | +2                       | 4.458      | 0.493         | 1.0000                     | 2                              |
|       | VLGNPKSDEMNVK                                                                                    | +2                       | 3.814      | 0.463         | 1.0000                     | 16                             |
|       | VLDFEHFLPMLQTVAK                                                                                 | +2                       | 4.965      | 0.475         | 1.0000                     | 65                             |
|       | ALGQNPTNAEVLKVLGNPKSDEMNVK                                                                       | +3                       | 4.699      | 0.567         | 1.0000                     | 4                              |
|       | HVLVTLGEK                                                                                        | +2                       | 2.568      | 0.453         | 0.9998                     | 26                             |
|       | MASCOT:(PepMatched Observed.Hits Coverage)                                                       |                          | 8          | 10            | 60.13%                     |                                |
|       | Seq                                                                                              | Charge ObservedMS        | ExpectedMS | CalculatedMS  | Pepscore PepHits           |                                |
|       | ALGQNPTNAEVLK                                                                                    | +2 677.87                | 1353.73    | 1353.73       | 0 64                       | 36                             |
|       | VFDKEGNGTVMGAEIR                                                                                 | +2                       | 861.93     | 1721.84       | 1721.84 0                  | 65 6                           |
|       | NKDQGTIEDYVEGLR                                                                                  | +2                       | 893.92     | 1785.82       | 1785.82 0                  | 90 8                           |
|       | NKDQGTIEDYVEGLRVFDK                                                                              | +3                       | 759.37     | 2275.07       | 2275.08 0                  | 44 2                           |
|       | ALGQNPTNAEVLKVLGNPK                                                                              | +2                       | 982.05     | 1962.09       | 1962.09 0                  | 98 9                           |
|       | EAFQLFDR                                                                                         | +2                       | 513.25     | 1024.50       | 1024.50 0                  | 45 3                           |
|       | VLDFEHFLPMLQTVAK                                                                                 | +2                       | 944.51     | 1887.00       | 1887.00 0                  | 73 6                           |
|       | VFDKEGNGTVMGAEIRHVLVTLGEK                                                                        | +3                       | 900.48     | 2698.41       | 2698.41 0                  | 57 2                           |
| 534.  | IPI00394395                                                                                      | Y Y                      | 0.19       | 2             | 2                          | 4                              |
| *Des: | 64 kDa protein                                                                                   |                          |            |               |                            |                                |
|       | SEQUEST:(PepMatched Observed.Hits Coverage)                                                      |                          | 2          | 2             | 7.84%                      |                                |
|       | Seq                                                                                              | Charge Xcor              | Delta      | Probility     | PepHits                    |                                |
|       | ILEVVNQVQDEER                                                                                    | +2                       | 4.666      | 0.500         | 1.0000                     | 2                              |
|       | GLLEPQIDDPDSNLEEVIDEADAVSVNNLGSK                                                                 | +3                       | 4.574      | 0.488         | 1.0000                     | 1                              |
|       | MASCOT:(PepMatched Observed.Hits Coverage)                                                       |                          | 3          | 1             | 6.51%                      |                                |
|       | Seq                                                                                              | Charge ObservedMS        | ExpectedMS | CalculatedMS  | Pepscore PepHits           |                                |
|       | SLQSQENMSPLASTR                                                                                  | +2                       | 824.91     | 1647.81       | 1647.79 0.02               | 50 2                           |
|       | ILEVVNQVQDEER                                                                                    | +2                       | 785.92     | 1569.82       | 1569.80 0.02               | 44 2                           |
|       | IPVFSAFR                                                                                         | +2                       | 468.77     | 935.53        | 935.52 0.01                | 45 3                           |
| 535.  | IPI00199607                                                                                      | Y N                      | 0.71       | 1             | 4                          | 0                              |
| *Des: | Carcinoembryonic antigen-related cell adhesion molecule, secreted isoform CEACAM1a-4C2 precursor |                          |            |               |                            |                                |
|       | SEQUEST:(PepMatched Observed.Hits Coverage)                                                      |                          | 4          | 1             | 16.27%                     |                                |
|       | Seq                                                                                              | Charge Xcor              | Delta      | Probility     | PepHits                    |                                |
|       | RPTSASSSPTETVYSVVK                                                                               | +2                       | 4.109      | 0.462         | 0.9998                     | 1                              |
|       | WLFNSQSLQLTDR                                                                                    | +2                       | 4.094      | 0.290         | 0.9981                     | 1                              |
|       | AYTLSVFDQQFNPIQTSVQFR                                                                            | +2                       | 4.986      | 0.606         | 1.0000                     | 1                              |
|       | SVLLLAHNLPQEFQVFYWK                                                                              | +3                       | 3.641      | 0.518         | 1.0000                     | 2                              |
|       | MASCOT:(PepMatched Observed.Hits Coverage)                                                       |                          |            |               |                            |                                |

**Identified Human Platelet Proteins**

|              |                                                                                                                |                                 |                   |                      |                                   |                                       |                |     |    |  |
|--------------|----------------------------------------------------------------------------------------------------------------|---------------------------------|-------------------|----------------------|-----------------------------------|---------------------------------------|----------------|-----|----|--|
| <b>No.</b>   | <b>Protein</b>                                                                                                 | <b>Matched (SEQUEST MASCOT)</b> | <b>emPAI</b>      | <b>Strategy.Hits</b> | <b>PepMatched(SEQUEST MASCOT)</b> | <b>SpectraMatched(SEQUEST MASCOT)</b> |                |     |    |  |
| 536.         | IPI00366051                                                                                                    | Y N                             | 0.16              | 2                    | 3                                 | 0                                     | 3              | 0   |    |  |
| <b>*Des:</b> | PREDICTED: transforming growth factor beta 1 induced transcript 1                                              |                                 |                   |                      |                                   |                                       |                |     |    |  |
|              | SEQUEST:(PepMatched Observed.Hits Coverage)                                                                    |                                 |                   |                      | 3                                 | 2                                     | 5.49%          |     |    |  |
|              | <b>Seq</b>                                                                                                     | <b>Charge</b>                   | <b>Xcor</b>       | <b>Delta</b>         | <b>Probility</b>                  | <b>PepHits</b>                        |                |     |    |  |
|              | DFLQLFAPR                                                                                                      |                                 | +2                | 2.767                | 0.323                             | 0.9950                                | 5              |     |    |  |
|              | GSLDTMLGLLQSDLSRR                                                                                              |                                 | +3                | 3.137                | 0.291                             | 0.9962                                | 1              |     |    |  |
|              | RDFLQLFAPR                                                                                                     |                                 | +2                | 2.901                | 0.298                             | 0.9933                                | 6              |     |    |  |
|              | MASCOT:(PepMatched Observed.Hits Coverage)                                                                     |                                 |                   |                      |                                   |                                       |                |     |    |  |
|              |                                                                                                                |                                 |                   |                      |                                   |                                       |                |     |    |  |
| <b>No.</b>   | <b>Protein</b>                                                                                                 | <b>Matched (SEQUEST MASCOT)</b> | <b>emPAI</b>      | <b>Strategy.Hits</b> | <b>PepMatched(SEQUEST MASCOT)</b> | <b>SpectraMatched(SEQUEST MASCOT)</b> |                |     |    |  |
| 537.         | IPI00365323                                                                                                    | Y Y                             | 0.9               | 4                    | 4                                 | 7                                     | 19             | 48  |    |  |
| <b>*Des:</b> | PREDICTED: similar to Chain A, Solution Structure Of Coactosin-Like Protein (Cofilin Family) From Mus Musculus |                                 |                   |                      |                                   |                                       |                |     |    |  |
|              | SEQUEST:(PepMatched Observed.Hits Coverage)                                                                    |                                 |                   |                      | 4                                 | 5                                     | 26.82%         |     |    |  |
|              | <b>Seq</b>                                                                                                     | <b>Charge</b>                   | <b>Xcor</b>       | <b>Delta</b>         | <b>Probility</b>                  | <b>PepHits</b>                        |                |     |    |  |
|              | SKFALITWIGEDVSGLQR                                                                                             |                                 | +2                | 6.698                | 0.562                             | 1.0000                                | 22             |     |    |  |
|              | ELEEDFIRSELK                                                                                                   |                                 | +2                | 3.234                | 0.254                             | 0.9572                                | 1              |     |    |  |
|              | AKTGTDKTLVK                                                                                                    |                                 | +2                | 3.481                | 0.337                             | 0.9927                                | 6              |     |    |  |
|              | FTTGDAMSKR                                                                                                     |                                 | +2                | 2.788                | 0.480                             | 0.9993                                | 4              |     |    |  |
|              | MASCOT:(PepMatched Observed.Hits Coverage)                                                                     |                                 |                   |                      | 7                                 | 6                                     | 31.21%         |     |    |  |
|              | <b>Seq</b>                                                                                                     | <b>Charge</b>                   | <b>ObservedMS</b> | <b>ExpectedMS</b>    | <b>CalculatedMS</b>               | <b>PepScore</b>                       | <b>PepHits</b> |     |    |  |
|              | FALITWIGEDVSGLQR                                                                                               |                                 | +2                | 902.9915             | 1803.9685                         | 1803.9519                             | 0.02           | 99  | 18 |  |
|              | TGTDKTLVK                                                                                                      |                                 | +2                | 481.7826             | 961.5506                          | 961.5444                              | 0.01           | 64  | 16 |  |
|              | EVVQNFAK                                                                                                       |                                 | +2                | 467.7562             | 933.4978                          | 933.4919                              | 0.01           | 50  | 7  |  |
|              | ELEEDFIRSELK                                                                                                   |                                 | +2                | 754.3921             | 1506.7696                         | 1506.7565                             | 0.01           | 51  | 2  |  |
|              | AKTGTDKTLVK                                                                                                    |                                 | +2                | 581.3494             | 1160.6843                         | 1160.6765                             | 0.01           | 75  | 7  |  |
|              | FTTGDAMSKR                                                                                                     |                                 | +2                | 557.2753             | 1112.5361                         | 1112.5284                             | 0.01           | 66  | 3  |  |
|              | SKFALITWIGEDVSGLQR                                                                                             |                                 | +2                | 1010.5564            | 2019.0982                         | 2019.0789                             | 0.02           | 115 | 3  |  |
|              |                                                                                                                |                                 |                   |                      |                                   |                                       |                |     |    |  |
| <b>No.</b>   | <b>Protein</b>                                                                                                 | <b>Matched (SEQUEST MASCOT)</b> | <b>emPAI</b>      | <b>Strategy.Hits</b> | <b>PepMatched(SEQUEST MASCOT)</b> | <b>SpectraMatched(SEQUEST MASCOT)</b> |                |     |    |  |
| 538.         | IPI00358033                                                                                                    | N Y                             | 0.14              | 1                    | 0                                 | 2                                     | 0              | 2   |    |  |
| <b>*Des:</b> | NADH dehydrogenase (Ubiquinone) Fe-S protein 1, 75kDa                                                          |                                 |                   |                      |                                   |                                       |                |     |    |  |
|              | SEQUEST:(PepMatched Observed.Hits Coverage)                                                                    |                                 |                   |                      |                                   |                                       |                |     |    |  |
|              | MASCOT:(PepMatched Observed.Hits Coverage)                                                                     |                                 |                   |                      | 2                                 | 1                                     | 4.32%          |     |    |  |
|              | <b>Seq</b>                                                                                                     | <b>Charge</b>                   | <b>ObservedMS</b> | <b>ExpectedMS</b>    | <b>CalculatedMS</b>               | <b>PepScore</b>                       | <b>PepHits</b> |     |    |  |
|              | FASEIAGVDDLGTTR                                                                                                |                                 | +2                | 804.90               | 1607.78                           | 1607.78                               | 0              | 83  | 1  |  |
|              | GLLTYTSWEDALSR                                                                                                 |                                 | +2                | 806.40               | 1610.79                           | 1610.79                               | 0              | 65  | 1  |  |
|              |                                                                                                                |                                 |                   |                      |                                   |                                       |                |     |    |  |
| <b>No.</b>   | <b>Protein</b>                                                                                                 | <b>Matched (SEQUEST MASCOT)</b> | <b>emPAI</b>      | <b>Strategy.Hits</b> | <b>PepMatched(SEQUEST MASCOT)</b> | <b>SpectraMatched(SEQUEST MASCOT)</b> |                |     |    |  |
| 539.         | IPI00372470                                                                                                    | Y Y                             | 0.13              | 2                    | 4                                 | 2                                     | 12             | 11  |    |  |
| <b>*Des:</b> | PREDICTED: similar to calcium and DAG-regulated guanine nucleotide exchange factor I                           |                                 |                   |                      |                                   |                                       |                |     |    |  |
|              | SEQUEST:(PepMatched Observed.Hits Coverage)                                                                    |                                 |                   |                      | 4                                 | 3                                     | 12.12%         |     |    |  |
|              | <b>Seq</b>                                                                                                     | <b>Charge</b>                   | <b>Xcor</b>       | <b>Delta</b>         | <b>Probility</b>                  | <b>PepHits</b>                        |                |     |    |  |
|              | NFDVDGDGHISQEEFQIR                                                                                             |                                 | +3                | 5.061                | 0.515                             | 1.0000                                | 2              |     |    |  |
|              | EEEVQTVEDGVFDIH                                                                                                |                                 | +2                | 5.319                | 0.586                             | 1.0000                                | 2              |     |    |  |
|              | YWVSAPFAEFDLNPELAEQIK                                                                                          |                                 | +2                | 4.732                | 0.545                             | 1.0000                                | 4              |     |    |  |
|              | DLVALQLALPDWLDPGR                                                                                              |                                 | +2                | 3.228                | 0.380                             | 0.9984                                | 2              |     |    |  |

Identified Human Platelet Proteins

| No.   | Protein                                      | Matched (SEQUEST MASCOT) | emPAI      | Strategy.Hits | PepMatched(SEQUEST MASCOT) | SpectraMatched(SEQUEST MASCOT) |
|-------|----------------------------------------------|--------------------------|------------|---------------|----------------------------|--------------------------------|
| 540.  | IPI00367939                                  | Y                        | Y          | 0.28          | 1                          | 5                              |
| *Des: | PREDICTED: integrin, alpha 2                 |                          |            |               |                            |                                |
|       | SEQUEST:(PepMatched Observed.Hits Coverage)  |                          | 5          | 1             | 7.48%                      |                                |
|       | Seq                                          | Charge                   | Xcor       | Delta         | Probility                  | PepHits                        |
|       | GVLNQHQFLEGPEGTGNAR                          | +3                       |            | 4.130         | 0.343                      | 0.9997 1                       |
|       | VDISLEKPGTSPALEYSETVK                        | +3                       |            | 5.244         | 0.546                      | 1.0000 2                       |
|       | YFFNVADEAALLEK                               | +2                       |            | 4.183         | 0.547                      | 1.0000 2                       |
|       | FGIAVLGYLNR                                  | +2                       |            | 3.176         | 0.450                      | 0.9995 2                       |
|       | ADNSVSLIVPLLYDAELHLTR                        | +3                       |            | 3.562         | 0.454                      | 0.9999 1                       |
|       | MASCOT:(PepMatched Observed.Hits Coverage)   |                          | 4          | 1             | 5.61%                      |                                |
|       | Seq                                          | Charge                   | ObservedMS | ExpectedMS    | CalculatedMS               | Pepscore PepHits               |
|       | FVQGLDIGPK                                   | +2                       | 537.30     | 1072.59       | 1072.59                    | 0 47 1                         |
|       | GVLNQHQFLEGPEGTGNAR                          | +3                       |            | 675.34        | 2022.99                    | 2022.99 0 51 1                 |
|       | VDISLEKPGTSPALEYSETVK                        | +3                       |            | 778.75        | 2333.22                    | 2333.20 0.02 62 2              |
|       | YFFNVADEAALLEK                               | +2                       | 815.41     | 1628.81       | 1628.81                    | 0 62 2                         |
| 541.  | IPI00199394                                  | Y                        | Y          | 0.2           | 1                          | 2                              |
| *Des: | 2',3'-cyclic-nucleotide 3'-phosphodiesterase |                          |            |               |                            |                                |
|       | SEQUEST:(PepMatched Observed.Hits Coverage)  |                          | 2          | 1             | 6.79%                      |                                |
|       | Seq                                          | Charge                   | Xcor       | Delta         | Probility                  | PepHits                        |
|       | ATGAEYYAQQDVVR                               | +2                       |            | 4.471         | 0.498                      | 1.0000 1                       |
|       | DFLPLYFGWFLTK                                | +2                       |            | 3.461         | 0.457                      | 0.9997 1                       |
|       | MASCOT:(PepMatched Observed.Hits Coverage)   |                          | 2          | 1             | 6.79%                      |                                |
|       | Seq                                          | Charge                   | ObservedMS | ExpectedMS    | CalculatedMS               | Pepscore PepHits               |
|       | ATGAEYYAQQDVVR                               | +2                       | 768.87     | 1535.73       | 1535.72                    | 0.01 82 1                      |
|       | DFLPLYFGWFLTK                                | +2                       | 823.94     | 1645.86       | 1645.85                    | 0.01 61 1                      |
| 542.  | IPI00464897                                  | Y                        | Y          | 0.02          | 1                          | 2                              |
| *Des: | Hypothetical LOC361596                       |                          |            |               |                            |                                |
|       | SEQUEST:(PepMatched Observed.Hits Coverage)  |                          | 2          | 1             | 5.65%                      |                                |
|       | Seq                                          | Charge                   | Xcor       | Delta         | Probility                  | PepHits                        |
|       | ATDFVVDVDR                                   | +2                       |            | 2.833         | 0.389                      | 0.9971 2                       |
|       | LNEHFLNTTDFLDTIK                             | +2                       |            | 3.941         | 0.435                      | 0.9992 1                       |
|       | MASCOT:(PepMatched Observed.Hits Coverage)   |                          | 2          | 1             | 5.65%                      |                                |
|       | Seq                                          | Charge                   | ObservedMS | ExpectedMS    | CalculatedMS               | Pepscore PepHits               |
|       | ATDFVVDVDR                                   | +2                       | 461.7392   | 921.4638      | 921.4556                   | 0.01 60 4                      |
|       | LNEHFLNTTDFLDTIK                             | +2                       |            | 961.0001      | 1919.9857                  | 1919.9629 0.02 54 2            |
| No.   | Protein                                      | Matched (SEQUEST MASCOT) | emPAI      | Strategy.Hits | PepMatched(SEQUEST MASCOT) | SpectraMatched(SEQUEST MASCOT) |

Identified Human Platelet Proteins

543. IPI00391997 N Y 0.25 1 0 2 0 14

\*Des: Splice Isoform 5 of Tropomyosin 1 alpha chain  
 SEQUEST:(PepMatched Observed.Hits Coverage)

| MASCOT:(PepMatched Observed.Hits Coverage) |        | 2          | 1          | 12%          |           |         |    |
|--------------------------------------------|--------|------------|------------|--------------|-----------|---------|----|
| Seq                                        | Charge | ObservedMS | ExpectedMS | CalculatedMS | PepScore  | PepHits |    |
| SLREQADAAEER                               | +2     | 673.8185   | 1345.6224  | 1345.6109    | 0.01      | 54      | 12 |
| AQKDEEKMEIQEQLK                            | +3     |            | 654.0146   | 1959.0221    | 1958.9982 | 0.02    | 50 |
|                                            |        |            |            |              |           |         | 4  |

No. Protein Matched (SEQUEST MASCOT) emPAI Strategy.Hits PepMatched(SEQUEST MASCOT) SpectraMatched(SEQUEST MASCOT)

544. IPI00373419 Y Y 0.06 4 9 10 13 30

\*Des: 251 kDa protein

| SEQUEST:(PepMatched Observed.Hits Coverage) |        | 9          | 7          | 6.2%         |           |           |      |
|---------------------------------------------|--------|------------|------------|--------------|-----------|-----------|------|
| Seq                                         | Charge | Xcor       | Delta      | Proability   | PepHits   |           |      |
| EGEDMIAEEHFGSEK                             |        |            | +2         | 3.714        | 0.536     | 0.9999    | 1    |
| TQTAIASEDMPNTLTEAEK                         |        |            | +2         | 5.419        | 0.588     | 1.0000    | 1    |
| LAEISDVWEEMK                                | +2     |            | 3.251      | 0.385        | 0.9991    |           | 2    |
| DVEDEILWVGER                                | +2     |            | 2.901      | 0.458        | 0.9994    |           | 2    |
| EVDDLEQWIAER                                | +2     |            | 3.383      | 0.410        | 0.9995    |           | 2    |
| DLDDFQSWLSR                                 | +2     |            | 3.301      | 0.403        | 0.9995    |           | 2    |
| FFWEMAEEEGWIR                               | +2     |            | 4.762      | 0.550        | 1.0000    |           | 2    |
| DGLNEAWADLLELIDTR                           |        |            | +2         | 3.552        | 0.417     | 0.9995    | 1    |
| IFQEMLYIMDWMDMK                             |        |            | +2         | 3.938        | 0.552     | 1.0000    | 2    |
| MASCOT:(PepMatched Observed.Hits Coverage)  |        | 10         | 7          | 6.66%        |           |           |      |
| Seq                                         | Charge | ObservedMS | ExpectedMS | CalculatedMS | PepScore  | PepHits   |      |
| VAVVNQIAR                                   | +2     | 485.3029   | 968.5912   | 968.5767     | 0.01      | 47        | 2    |
| DLDDFQSWLSR                                 | +2     | 691.3327   | 1380.6509  | 1380.6310    | 0.02      | 68        | 4    |
| LAEISDVWEEMK                                | +2     | 725.3636   | 1448.7127  | 1448.6857    | 0.03      | 82        | 4    |
| DVEDEILWVGER                                | +2     | 730.3693   | 1458.7240  | 1458.6990    | 0.02      | 77        | 4    |
| EVDDLEQWIAER                                | +2     | 751.8717   | 1501.7289  | 1501.7048    | 0.02      | 67        | 4    |
| EGEDMIAEEHFGSEK                             |        |            | +2         | 854.3799     | 1706.7452 | 1706.7093 | 0.04 |
| FFWEMAEEEGWIR                               | +2     | 865.4026   | 1728.7907  | 1728.7606    | 0.03      | 68        | 4    |
| DGLNEAWADLLELIDTR                           |        |            | +2         | 972.5115     | 1943.0085 | 1942.9636 | 0.04 |
| TQTAIASEDMPNTLTEAEK                         |        |            | +2         | 1025.5027    | 2048.9908 | 2048.9572 | 0.03 |
| IFQEMLYIMDWMDMK                             |        |            | +2         | 1061.9949    | 2121.9752 | 2121.9283 | 0.05 |

No. Protein Matched (SEQUEST MASCOT) emPAI Strategy.Hits PepMatched(SEQUEST MASCOT) SpectraMatched(SEQUEST MASCOT)

545. IPI00364452 Y N 0.2 2 2 0 2 0

\*Des: PREDICTED: similar to Serine/threonine protein kinase 24

| SEQUEST:(PepMatched Observed.Hits Coverage) |        | 2    | 3     | 7.63%      |         |        |   |
|---------------------------------------------|--------|------|-------|------------|---------|--------|---|
| Seq                                         | Charge | Xcor | Delta | Proability | PepHits |        |   |
| LADFGVAGQLTDTQIK                            |        |      | +2    | 4.878      | 0.476   | 1.0000 | 1 |
| ADIWSLGITAIELAK                             | +2     |      | 3.793 | 0.450      | 0.9997  |        | 1 |

MASCOT:(PepMatched Observed.Hits Coverage)

No. Protein Matched (SEQUEST MASCOT) emPAI Strategy.Hits PepMatched(SEQUEST MASCOT) SpectraMatched(SEQUEST MASCOT)

546. IPI00198667 Y Y 0.32 2 4 5 11 11

\*Des: Clusterin precursor

Identified Human Platelet Proteins

| SEQUEST:(PepMatched Observed.Hits Coverage) |        | 4          | 4          | 11.64%       |         |                  |
|---------------------------------------------|--------|------------|------------|--------------|---------|------------------|
| Seq                                         | Charge | Xcor       | Delta      | Proability   | PepHits |                  |
| ASGIIDTLFQDR                                | +2     |            | 2.908      | 0.390        | 0.9974  | 1                |
| VSTVTTHSSDSEVPSR                            |        | +3         |            | 3.574        | 0.365   | 0.9999 1         |
| VSTVTTHSSDSEVPSRVTEVVVK                     |        | +3         |            | 3.420        | 0.356   | 0.9991 1         |
| LTQQYNELLHSLQSK                             | +2     |            | 4.195      | 0.492        | 1.0000  | 3                |
| MASCOT:(PepMatched Observed.Hits Coverage)  |        | 5          | 4          | 12.08%       |         |                  |
| Seq                                         | Charge | ObservedMS | ExpectedMS | CalculatedMS |         | Pepscore PepHits |
| LTQQYNELLHSLQSK                             | +2     |            | 901.49     | 1800.96      | 1800.94 | 0.02 58 3        |
| LFSDPITVVLPEEVSK                            | +2     |            | 944.51     | 1887.00      | 1886.99 | 0.01 104 6       |
| EGALDDTR                                    | +2     | 438.71     | 875.40     | 875.40       | 0       | 52 2             |
| SLLNSLEEAK                                  | +2     | 552.30     | 1102.59    | 1102.59      | 0       | 49 2             |
| KSLLNSLEEAK                                 | +2     | 616.35     | 1230.69    | 1230.68      | 0.01    | 44 1             |

No. 547. Protein IPI00231381 Matched (SEQUEST MASCOT) Y N emPAI 0.12 Strategy.Hits 1 PepMatched (SEQUEST MASCOT) 3 SpectraMatched (SEQUEST MASCOT) 0

\*Des: Major vault protein

| SEQUEST:(PepMatched Observed.Hits Coverage) |        | 3    | 1     | 6.88%      |         |   |
|---------------------------------------------|--------|------|-------|------------|---------|---|
| Seq                                         | Charge | Xcor | Delta | Proability | PepHits |   |
| GIQDVYVLSQQLLLK                             | +2     |      | 3.597 | 0.416      | 0.9959  | 1 |
| LAQDPFPLYPGEVLEK                            | +2     |      | 3.675 | 0.368      | 0.9989  | 1 |
| SVGAYLPAVFEEVLDLVDVILTEK                    | +3     |      | 4.909 | 0.496      | 1.0000  | 1 |
| MASCOT:(PepMatched Observed.Hits Coverage)  |        |      |       |            |         |   |

No. 548. Protein IPI00194525 Matched (SEQUEST MASCOT) Y Y emPAI 0.99 Strategy.Hits 4 PepMatched (SEQUEST MASCOT) 21 SpectraMatched (SEQUEST MASCOT) 63

\*Des: Coagulation factor XIII A chain precursor

| SEQUEST:(PepMatched Observed.Hits Coverage) |        | 21   | 16    | 34.76%     |         |           |
|---------------------------------------------|--------|------|-------|------------|---------|-----------|
| Seq                                         | Charge | Xcor | Delta | Proability | PepHits |           |
| DGTHVVENV DATHIGK                           |        | +3   |       | 4.544      | 0.545   | 1.0000 6  |
| LIASMTSDSLR                                 | +2     |      | 3.545 | 0.585      | 1.0000  | 2         |
| LSVQSSPECIVGK                               | +2     |      | 3.857 | 0.446      | 0.9997  | 2         |
| EIGGDGMQDITDTYK                             |        | +2   |       | 3.509      | 0.524   | 0.9998 2  |
| GTYPVPVVTTELQSGK                            |        | +2   |       | 3.615      | 0.551   | 1.0000 11 |
| SDVDMNFDVENAVLGK                            |        | +2   |       | 4.797      | 0.504   | 1.0000 3  |
| SDVDMNFDVENAVLGKDFR                         |        | +2   |       | 5.048      | 0.527   | 1.0000 4  |
| TESFEVTL DPLSLEK+2                          |        |      | 4.816 | 0.487      | 1.0000  | 2         |
| VGSAMVNAK                                   | +2     |      | 3.016 | 0.495      | 0.9997  | 5         |
| WDSNKIDHHTDKYDNNK                           |        | +3   |       | 4.795      | 0.415   | 1.0000 2  |
| HVYGELDLQIR                                 | +2     |      | 2.754 | 0.413      | 0.9978  | 4         |
| RAIPPNN SNAAEVDLPTEDLQGLVPR                 |        | +3   |       | 4.215      | 0.509   | 1.0000 1  |
| TESFEVTL DPLSLEKK                           |        | +2   |       | 3.977      | 0.438   | 0.9996 3  |
| KDGTHVVENV DATHIGK                          |        | +3   |       | 5.700      | 0.569   | 1.0000 6  |
| KLIASMTSDSLR                                | +2     |      | 3.917 | 0.527      | 1.0000  | 7         |
| DYLNVTAVHLFK                                | +2     |      | 3.565 | 0.465      | 0.9962  | 3         |
| AGEYMSYLLEQGLLHFFVTAR                       |        | +3   |       | 5.161      | 0.588   | 1.0000 2  |
| GTYPVPVVTTELQSGKWGAK                        |        | +2   |       | 3.311      | 0.474   | 0.9973 3  |

Identified Human Platelet Proteins

| Seq                                                     | Charge | ObservedMS | ExpectedMS | CalculatedMS | PepScore | PepHits |
|---------------------------------------------------------|--------|------------|------------|--------------|----------|---------|
| GVSLKDYLNVTAVHLFK                                       | +2     | 597.3173   | 1192.6200  | 1192.6122    | 0.01     | 97      |
| IDHHTDKYDNNKLIVR                                        | +3     | 438.7373   | 875.4601   | 875.4534     | 0.01     | 70      |
| NVWLHLEGGVMPK                                           | +3     | 3.127      | 0.427      | 1.0000       |          | 7       |
| MASCOT:(PepMatched Observed.Hits Coverage) 17 18 25.23% |        |            |            |              |          |         |
| LIASMTSDSLR                                             | +2     | 597.3173   | 1192.6200  | 1192.6122    | 0.01     | 97      |
| EIGGDGMQDITDTYK                                         | +2     | 821.8745   | 1641.7345  | 1641.7192    | 0.02     | 62      |
| SDVDMNFDVENAVLGK                                        | +2     | 876.9194   | 1751.8242  | 1751.8035    | 0.02     | 90      |
| TESFEVTLDPLSLEK+2                                       |        | 854.4453   | 1706.8761  | 1706.8614    | 0.01     | 88      |
| LSVQSSPECIVGK                                           | +2     | 673.8581   | 1345.7016  | 1345.6911    | 0.01     | 62      |
| GTYPVPVTELQSGK                                          | +2     | 844.4738   | 1686.9331  | 1686.9192    | 0.01     | 101     |
| TESFEVTLDPLSLEKK                                        | +2     | 918.4932   | 1834.9718  | 1834.9564    | 0.02     | 43      |
| IDHHTDKYDNNK                                            | +2     | 750.3547   | 1498.6948  | 1498.6801    | 0.01     | 53      |
| VGSAMVNAK                                               | +2     | 438.7373   | 875.4601   | 875.4534     | 0.01     | 70      |
| DGTHVVENVDATHIGK                                        | +2     | 846.4302   | 1690.8459  | 1690.8274    | 0.02     | 65      |
| KLIASMTSDSLR                                            | +2     | 661.3658   | 1320.7170  | 1320.7071    | 0.01     | 91      |
| DYLNVTAVHLFK                                            | +2     | 711.3621   | 1420.7097  | 1418.7558    | 1.95     | 56      |
| GNIKVS                                                  | +2     | 435.7645   | 869.5145   | 869.5083     | 0.01     | 41      |
| KDGTHVVENVDATHIGK                                       | +2     | 910.4752   | 1818.9358  | 1818.9224    | 0.01     | 61      |
| AGEYMSYLLEQGLLHFFVTAR                                   | +3     | 815.7532   | 2444.2379  | 2444.2198    | 0.02     | 75      |
| GTYPVPVTELQSGK                                          | +2     | 1065.5925  | 2129.1705  | 2129.1520    | 0.02     | 67      |
| GVSLKDYLNVTAVHLFK                                       | +2     | 952.5452   | 1903.0759  | 1903.0567    | 0.02     | 106     |

| No.   | Protein                                          | Matched (SEQUEST MASCOT) | emPAI        | Strategy.Hits | PepMatched(SEQUEST MASCOT) | SpectraMatched(SEQUEST MASCOT) |
|-------|--------------------------------------------------|--------------------------|--------------|---------------|----------------------------|--------------------------------|
| 549.  | IPI00207254                                      | Y                        | Y            | 0.1           | 1                          | 2                              |
| *Des: | Splice Isoform 2 of Synaptotagmin-like protein 4 |                          |              |               |                            |                                |
|       | SEQUEST:(PepMatched Observed.Hits Coverage)      | 2                        | 1            | 8.62%         |                            |                                |
|       | Seq Charge Xcor Delta                            | Probility                | PepHits      |               |                            |                                |
|       | SALEAESESLDSYTADSDSTSR                           | +2                       | 5.736        | 0.593         | 1.0000                     | 1                              |
|       | SVIDLRPEDVAQESGILGDR                             | +3                       | 3.823        | 0.421         | 1.0000                     | 1                              |
|       | MASCOT:(PepMatched Observed.Hits Coverage)       | 2                        | 1            | 8.62%         |                            |                                |
|       | Seq Charge ObservedMS                            | ExpectedMS               | CalculatedMS | PepScore      | PepHits                    |                                |
|       | SVIDLRPEDVAQESGILGDR                             | +3                       | 723.7225     | 2168.1456     | 2168.1073                  | 0.04                           |
|       | SALEAESESLDSYTADSDSTSR                           | +2                       | 1161.0204    | 2320.0262     | 2319.9826                  | 0.04                           |

| No.   | Protein                                                          | Matched (SEQUEST MASCOT) | emPAI   | Strategy.Hits | PepMatched(SEQUEST MASCOT) | SpectraMatched(SEQUEST MASCOT) |
|-------|------------------------------------------------------------------|--------------------------|---------|---------------|----------------------------|--------------------------------|
| 550.  | IPI00382098                                                      | Y                        | N       | 0.22          | 1                          | 2                              |
| *Des: | RT1 class I histocompatibility antigen, AA alpha chain precursor |                          |         |               |                            |                                |
|       | SEQUEST:(PepMatched Observed.Hits Coverage)                      | 2                        | 1       | 7.67%         |                            |                                |
|       | Seq Charge Xcor Delta                                            | Probility                | PepHits |               |                            |                                |
|       | FIAVGYVDDTEFVR                                                   | +2                       | 4.067   | 0.397         | 0.9997                     | 2                              |
|       | TWTAADFAAQITR                                                    | +2                       | 2.931   | 0.196         | 0.9515                     | 1                              |
|       | MASCOT:(PepMatched Observed.Hits Coverage)                       |                          |         |               |                            |                                |

| No.   | Protein                                    | Matched (SEQUEST MASCOT) | emPAI | Strategy.Hits | PepMatched(SEQUEST MASCOT) | SpectraMatched(SEQUEST MASCOT) |
|-------|--------------------------------------------|--------------------------|-------|---------------|----------------------------|--------------------------------|
| 551.  | IPI00196994                                | Y                        | Y     | 2.55          | 3                          | 8                              |
| *Des: | Rho GDP dissociation inhibitor (GDI) alpha |                          |       |               |                            |                                |

Identified Human Platelet Proteins

| SEQUEST:(PepMatched Observed.Hits Coverage) |        | 8          | 4          | 50%          |           |           |           |
|---------------------------------------------|--------|------------|------------|--------------|-----------|-----------|-----------|
| Seq                                         | Charge | Xcor       | Delta      | Proability   | PepHits   |           |           |
| IDKTDYMGVGSYGPR                             | +2     |            | 3.937      | 0.515        | 1.0000    | 9         |           |
| VAVSADPNVPNVIVTR                            |        |            | +2         | 4.655        | 0.541     | 1.0000    | 9         |
| LTLVCSTAPGPLELDTGDLESFKK                    |        |            |            | +3           | 2.786     | 0.367     | 0.9986 4  |
| SIQEIQLDKDDESLR                             |        |            | +2         | 5.731        | 0.493     | 1.0000    | 4         |
| AEYEFLTPMEEAPK                              |        |            | +2         | 4.700        | 0.521     | 1.0000    | 5         |
| SIQEIQLDKDDESLRK                            |        |            | +3         | 4.046        | 0.488     | 1.0000    | 2         |
| YKEALLGR                                    |        |            | +2         | 2.706        | 0.9675    | 2         |           |
| GVKIDKTDYMGVGSYGPR                          |        |            | +2         | 5.500        | 0.595     | 1.0000    | 5         |
| MASCOT:(PepMatched Observed.Hits Coverage)  |        | 4          | 4          | 25%          |           |           |           |
| Seq                                         | Charge | ObservedMS | ExpectedMS | CalculatedMS |           | Pepscore  | PepHits   |
| SIQEIQLDKDDESLR                             |        | +2         | 959.4800   | 1916.9455    | 1916.9327 | 0.01      | 85 8      |
| IDKTDYMGVGSYGPR                             |        | +2         | 801.3906   | 1600.7666    | 1600.7555 | 0.01      | 98 9      |
| VAVSADPNVPNVIVTR                            |        | +2         |            | 825.9686     | 1649.9226 | 1649.9100 | 0.01 97 9 |
| GVKIDKTDYMGVGSYGPR                          |        | +2         |            | 943.4833     | 1884.9521 | 1884.9403 | 0.01 99 5 |

No. 552. Protein IPI00362927 Matched (SEQUEST MASCOT) Y Y emPAI 1.09 Strategy.Hits 4 PepMatched(SEQUEST MASCOT) 3 SpectraMatched(SEQUEST MASCOT) 11 41 118

\*Des: Similar to Tubulin alpha-4 chain

| SEQUEST:(PepMatched Observed.Hits Coverage) |        | 3          | 7          | 8.33%        |         |          |            |
|---------------------------------------------|--------|------------|------------|--------------|---------|----------|------------|
| Seq                                         | Charge | Xcor       | Delta      | Proability   | PepHits |          |            |
| AVFVDLEPTVIDEIR                             |        | +2         | 3.656      | 0.344        | 0.9996  | 4        |            |
| AVFVDLEPTVIDEIRNGPYR                        |        | +2         |            | 3.184        | 0.353   | 0.9973   | 14         |
| GHYTIGKEIIDPVLDLR                           |        | +3         |            | 4.875        | 0.440   | 1.0000   | 31         |
| MASCOT:(PepMatched Observed.Hits Coverage)  |        | 11         | 13         | 30.04%       |         |          |            |
| Seq                                         | Charge | ObservedMS | ExpectedMS | CalculatedMS |         | Pepscore | PepHits    |
| NLDIERPTYTNLNR                              |        | +2         | 859.95     | 1717.88      | 1717.87 | 0.01     | 64 48      |
| DVNAAIAAIK                                  |        | +2         | 493.29     | 984.56       | 984.56  | 0        | 72 6       |
| EIIDPVLDLR                                  |        | +2         | 535.30     | 1068.58      | 1068.58 | 0        | 47 4       |
| VGINYQPPTVVPGDLAK                           |        | +2         |            | 913.00       | 1823.99 | 1823.98  | 0.01 65 10 |
| FDLMYAK+2                                   |        | 444.22     | 886.43     | 886.43       | 0       | 51       | 12         |
| LDHKFDLMYAK                                 |        | +2         | 690.85     | 1379.69      | 1379.69 | 0        | 44 4       |
| QLFHPEQLITGK                                |        | +2         | 705.89     | 1409.77      | 1409.77 | 0        | 46 16      |
| QLFHPEQLITGKEDAANNYAR                       |        | +3         |            | 805.74       | 2414.20 | 2414.20  | 0 79 4     |
| AVFVDLEPTVIDEIR                             |        | +2         | 858.47     | 1714.92      | 1714.91 | 0.01     | 95 4       |
| IHFPLATYAPVISA EK                           |        | +2         |            | 878.99       | 1755.96 | 1755.96  | 0 90 42    |
| LISQIVSSITASLR                              |        | +2         | 744.45     | 1486.88      | 1486.87 | 0.01     | 84 28      |

No. 553. Protein IPI00207184 Matched (SEQUEST MASCOT) Y Y emPAI 0.83 Strategy.Hits 3 PepMatched(SEQUEST MASCOT) 4 SpectraMatched(SEQUEST MASCOT) 4 11 8

\*Des: Endoplasmic reticulum protein ERp29 precursor

| SEQUEST:(PepMatched Observed.Hits Coverage) |        | 4    | 2     | 20%        |         |        |   |
|---------------------------------------------|--------|------|-------|------------|---------|--------|---|
| Seq                                         | Charge | Xcor | Delta | Proability | PepHits |        |   |
| FDTQYPYGEK                                  |        | +2   | 3.233 | 0.456      | 0.9999  | 5      |   |
| DGDFENVPYSGAVK                              |        | +2   |       | 4.569      | 0.473   | 1.0000 | 3 |
| ILDQGEDFPASELAR                             |        | +2   |       | 4.878      | 0.595   | 1.0000 | 2 |



Identified Human Platelet Proteins

| SLNILTAFR                                  | +2     | 3.489      | 0.456      | 0.9996       | 6    |     |     |          |         |  |
|--------------------------------------------|--------|------------|------------|--------------|------|-----|-----|----------|---------|--|
| MASCOT:(PepMatched Observed.Hits Coverage) |        |            |            |              |      | 4   | 4   | 20%      |         |  |
| Seq                                        | Charge | ObservedMS | ExpectedMS | CalculatedMS |      |     |     | Pepscore | PepHits |  |
| FDTQYPYGEK                                 | +2     | 624.29     | 1246.56    | 1246.55      | 0.01 | 42  | 5   |          |         |  |
| DGDFENVPYSGAVK                             | +2     | 797.88     | 1593.75    | 1593.73      | 0.02 | 62  | 62  | 3        |         |  |
| ILDQGEDFPASELAR                            | +2     | 830.92     | 1659.83    | 1659.81      | 0.02 | 114 | 114 | 2        |         |  |
| SLNILTAFR                                  | +2     | 518.77     | 1035.52    | 1033.59      | 1.93 | 56  | 6   |          |         |  |

No. 554. Protein IPI00215349 Matched (SEQUEST MASCOT) Y Y emPAI 0.91 Strategy.Hits 4 PepMatched(SEQUEST MASCOT) 15 SpectraMatched(SEQUEST MASCOT) 70 51

\*Des:

| Hypothetical LOC360950                      |        |            |            |              |         | 15 | 6  | 42.3%    |         |  |  |
|---------------------------------------------|--------|------------|------------|--------------|---------|----|----|----------|---------|--|--|
| SEQUEST:(PepMatched Observed.Hits Coverage) |        |            |            |              |         | 15 | 6  | 42.3%    |         |  |  |
| Seq                                         | Charge | Xcor       | Delta      | Probility    | PepHits |    |    |          |         |  |  |
| VFASLPQVER                                  | +2     | 3.181      | 0.368      | 0.9986       | 6       |    |    |          |         |  |  |
| MTVDESGQLVSCSMDDTVR                         | +2     | 5.891      | 0.670      | 1.0000       | 2       |    |    |          |         |  |  |
| YAPSGFYIASGDISGK                            | +2     | 3.665      | 0.481      | 0.9997       | 1       |    |    |          |         |  |  |
| FATASADGQIFIYDGK                            | +2     | 4.015      | 0.513      | 1.0000       | 1       |    |    |          |         |  |  |
| FGAVFLWDTGSSVGEITGHNK                       | +3     | 4.475      | 0.505      | 1.0000       | 2       |    |    |          |         |  |  |
| IKDIAWTEDSKR                                | +3     | 3.813      | 0.420      | 1.0000       | 5       |    |    |          |         |  |  |
| NIDNPAVADIYTEHAHQVVVAK                      | +2     | 4.912      | 0.508      | 1.0000       | 6       |    |    |          |         |  |  |
| SYIYSGSHDGHINYWDSSETGENDSFSGK               | +3     | 7.511      | 0.634      | 1.0000       | 1       |    |    |          |         |  |  |
| VYSILGATLKDEGK                              | +3     | 2.795      | 0.393      | 0.9995       | 9       |    |    |          |         |  |  |
| GPVTDLAYSHDGAFLAVCDASK                      | +2     | 5.783      | 0.695      | 1.0000       | 2       |    |    |          |         |  |  |
| LATGSDDNCAAFFEGPPFK                         | +2     | 3.991      | 0.337      | 0.9985       | 2       |    |    |          |         |  |  |
| IWDTTQKEHILK                                | +2     | 3.853      | 0.375      | 0.9970       | 5       |    |    |          |         |  |  |
| LHHVSSLAWLDEHTLVTTSHDASVK                   | +3     | 5.254      | 0.540      | 1.0000       | 7       |    |    |          |         |  |  |
| KVFASLPQVER                                 | +2     | 3.656      | 0.478      | 1.0000       | 15      |    |    |          |         |  |  |
| FKFTIGDHSR                                  | +2     | 2.763      | 0.323      | 0.9720       | 5       |    |    |          |         |  |  |
| MASCOT:(PepMatched Observed.Hits Coverage)  |        |            |            |              |         | 15 | 8  | 29.33%   |         |  |  |
| Seq                                         | Charge | ObservedMS | ExpectedMS | CalculatedMS |         |    |    | Pepscore | PepHits |  |  |
| DYSGQGIVK                                   | +2     | 476.7431   | 951.4717   | 951.4661     | 0.01    | 46 | 4  |          |         |  |  |
| FTIGDHSR                                    | +2     | 466.7351   | 931.4557   | 931.4512     | 0       | 41 | 2  |          |         |  |  |
| FATASADGQIFIYDGK                            | +2     | 852.4224   | 1702.8302  | 1702.8202    | 0.01    | 75 | 75 | 2        |         |  |  |
| IAVVGEGR                                    | +2     | 400.7375   | 799.4604   | 799.4551     | 0.01    | 41 | 6  |          |         |  |  |
| VINSVDIK                                    | +2     | 444.2656   | 886.5167   | 886.5123     | 0       | 43 | 3  |          |         |  |  |
| VYSILGATLKDEGK                              | +2     | 747.4201   | 1492.8257  | 1492.8136    | 0.01    | 92 | 8  |          |         |  |  |
| YAPSGFYIASGDISGK                            | +2     | 816.9069   | 1631.7993  | 1631.7831    | 0.02    | 57 | 57 | 1        |         |  |  |
| LATGSDDNCAAFFEGPPFK                         | +2     | 993.9537   | 1985.8928  | 1985.8829    | 0.01    | 75 | 75 | 2        |         |  |  |
| IKDIAWTEDSKR                                | +2     | 731.3898   | 1460.7651  | 1460.7623    | 0       | 44 | 3  |          |         |  |  |
| VKIQDAHR                                    | +2     | 483.7810   | 965.5474   | 965.5406     | 0.01    | 46 | 2  |          |         |  |  |
| IWDTTQKEHILK                                | +2     | 756.4193   | 1510.8239  | 1510.8144    | 0.01    | 47 | 5  |          |         |  |  |
| VFASLPQVER                                  | +2     | 573.3232   | 1144.6318  | 1144.6240    | 0.01    | 41 | 3  |          |         |  |  |
| LHHVSSLAWLDEHTLVTTSHDASVK                   | +3     | 928.4814   | 2782.4223  | 2782.4038    | 0.02    | 73 | 73 | 3        |         |  |  |
| FKFTIGDHSR                                  | +2     | 604.3174   | 1206.6203  | 1206.6145    | 0.01    | 46 | 3  |          |         |  |  |
| KVFASLPQVER                                 | +3     | 425.2492   | 1272.7257  | 1272.7190    | 0.01    | 75 | 9  |          |         |  |  |

No. Protein Matched (SEQUEST MASCOT) emPAI Strategy.Hits PepMatched(SEQUEST MASCOT) SpectraMatched(SEQUEST MASCOT)

|       |                                             | Identified Human Platelet Proteins |            |               |                            |                                |           |       |        |    |  |  |
|-------|---------------------------------------------|------------------------------------|------------|---------------|----------------------------|--------------------------------|-----------|-------|--------|----|--|--|
| 555.  | IPI00211206                                 | Y                                  | Y          | 0.93          | 3                          | 11                             | 9         | 36    | 34     |    |  |  |
| *Des: | PDZ and LIM domain protein 1                |                                    |            |               |                            |                                |           |       |        |    |  |  |
|       | SEQUEST:(PepMatched Observed.Hits Coverage) |                                    |            | 11            | 6                          | 53.61%                         |           |       |        |    |  |  |
|       | Seq                                         | Charge                             | Xcor       | Delta         | Proability                 | PepHits                        |           |       |        |    |  |  |
|       | GCVDNMTLTVSR                                | +2                                 |            | 3.902         | 0.448                      | 0.9998                         | 2         |       |        |    |  |  |
|       | AAIANLCIGDLITAI                             | DGEDTSSMTHLEAQNK                   |            |               |                            | +3                             | 5.081     | 0.600 | 1.0000 | 4  |  |  |
|       | VAASVGNAQK                                  | +2                                 |            | 3.204         | 0.405                      | 0.9992                         | 4         |       |        |    |  |  |
|       | TSASGEEANSRPSA                              | QPHPSGGLIIDKESEVYK                 |            |               |                            | +3                             | 5.124     | 0.559 | 1.0000 | 3  |  |  |
|       | GHFFVGDQIYCEK                               | +2                                 |            | 3.166         | 0.393                      | 0.9982                         | 1         |       |        |    |  |  |
|       | ERVTPPEGYDVVTVFP                            |                                    |            | +3            | 3.786                      | 0.515                          | 1.0000    | 2     |        |    |  |  |
|       | ERVTPPEGYDVVTVFPK                           |                                    |            | +2            | 3.934                      | 0.362                          | 0.9948    | 1     |        |    |  |  |
|       | VAASVGNAQKLPICDK                            |                                    |            | +2            | 4.856                      | 0.533                          | 1.0000    | 11    |        |    |  |  |
|       | SAMPFTASPAPGTR                              | +2                                 |            | 3.551         | 0.488                      | 0.9997                         | 5         |       |        |    |  |  |
|       | MNLASEPQEV                                  | LHIGSAHNR                          |            | +2            | 5.803                      | 0.563                          | 1.0000    | 17    |        |    |  |  |
|       | LVGGKDFEQPLAISR                             |                                    |            | +2            | 4.859                      | 0.513                          | 1.0000    | 17    |        |    |  |  |
|       | MASCOT:(PepMatched Observed.Hits Coverage)  |                                    |            | 9             | 7                          | 35.24%                         |           |       |        |    |  |  |
|       | Seq                                         | Charge                             | ObservedMS | ExpectedMS    | CalculatedMS               | Pepscore PepHits               |           |       |        |    |  |  |
|       | GCVDNMTLTVSR                                | +2                                 | 648.3126   | 1294.6106     | 1294.6009                  | 0.01                           | 80        | 2     |        |    |  |  |
|       | GHFFVGDQIYCEK                               | +2                                 | 771.8634   | 1541.7123     | 1541.6972                  | 0.02                           | 45        | 1     |        |    |  |  |
|       | VAASVGNAQK                                  | +2                                 | 472.7646   | 943.5146      | 943.5086                   | 0.01                           | 62        | 4     |        |    |  |  |
|       | IWSPLVTEEGKR                                | +2                                 | 707.8950   | 1413.7755     | 1413.7616                  | 0.01                           | 57        | 2     |        |    |  |  |
|       | SVKAPVTK                                    | +2                                 | 415.2633   | 828.5121      | 828.5069                   | 0.01                           | 49        | 3     |        |    |  |  |
|       | MNLASEPQEV                                  | LHIGSAHNR                          |            | +2            | 1052.0321                  | 2102.0497                      | 2102.0327 | 0.02  | 118    | 11 |  |  |
|       | VAASVGNAQKLPICDK                            |                                    |            | +2            | 807.4447                   | 1612.8749                      | 1612.8606 | 0.01  | 88     | 10 |  |  |
|       | SAMPFTASPAPGTR                              | +2                                 | 695.8477   | 1389.6809     | 1389.6711                  | 0.01                           | 61        | 5     |        |    |  |  |
|       | LVGGKDFEQPLAISR                             |                                    |            | +2            | 815.4589                   | 1628.9033                      | 1628.8885 | 0.01  | 85     | 14 |  |  |
| No.   | Protein                                     | Matched (SEQUENT MASCOT)           | emPAI      | Strategy.Hits | PepMatched(SEQUENT MASCOT) | SpectraMatched(SEQUENT MASCOT) |           |       |        |    |  |  |
| 556.  | IPI00213677                                 | Y                                  | N          | 0.59          | 3                          | 4                              | 0         | 7     | 0      |    |  |  |
| *Des: | ADP-ribosylation factor 2                   |                                    |            |               |                            |                                |           |       |        |    |  |  |
|       | SEQUENT:(PepMatched Observed.Hits Coverage) |                                    |            | 4             | 3                          | 30.81%                         |           |       |        |    |  |  |
|       | Seq                                         | Charge                             | Xcor       | Delta         | Proability                 | PepHits                        |           |       |        |    |  |  |
|       | ILMVGLDAAGK                                 | +2                                 |            | 3.338         | 0.493                      | 0.9998                         | 6         |       |        |    |  |  |
|       | LGEIVTTIPTIGFNVETVEYK                       |                                    |            | +2            | 3.753                      | 0.616                          | 1.0000    | 1     |        |    |  |  |
|       | LKLGEIVTTIPTIGFNVETVEYK                     |                                    |            | +3            | 3.436                      | 0.392                          | 0.9997    | 2     |        |    |  |  |
|       | HYFQNTQGLIFVVDSDNRER                        |                                    |            | +3            | 4.189                      | 0.548                          | 1.0000    | 3     |        |    |  |  |
|       | MASCOT:(PepMatched Observed.Hits Coverage)  |                                    |            |               |                            |                                |           |       |        |    |  |  |
| No.   | Protein                                     | Matched (SEQUENT MASCOT)           | emPAI      | Strategy.Hits | PepMatched(SEQUENT MASCOT) | SpectraMatched(SEQUENT MASCOT) |           |       |        |    |  |  |
| 557.  | IPI00192859                                 | Y                                  | Y          | 0.14          | 2                          | 7                              | 6         | 15    | 16     |    |  |  |
| *Des: | PREDICTED: similar to mKIAA1631 protein     |                                    |            |               |                            |                                |           |       |        |    |  |  |
|       | SEQUENT:(PepMatched Observed.Hits Coverage) |                                    |            | 7             | 4                          | 9.03%                          |           |       |        |    |  |  |
|       | Seq                                         | Charge                             | Xcor       | Delta         | Proability                 | PepHits                        |           |       |        |    |  |  |
|       | IQVHYYEDGNVQLVSHK                           |                                    |            | +3            | 5.774                      | 0.453                          | 1.0000    | 7     |        |    |  |  |
|       | IEGYDDQVLITEHGDLGNSR                        |                                    |            | +2            | 4.934                      | 0.627                          | 1.0000    | 2     |        |    |  |  |
|       | EGAAHAFQAQYNMDQFTPVK                        |                                    |            | +2            | 5.241                      | 0.567                          | 1.0000    | 2     |        |    |  |  |
|       | LLLNDNLLR                                   | +2                                 |            | 2.840         | 0.217                      | 0.9741                         | 4         |       |        |    |  |  |

Identified Human Platelet Proteins

| Seq                                                            | Charge | ObservedMS | ExpectedMS | CalculatedMS | PepScore | PepHits |
|----------------------------------------------------------------|--------|------------|------------|--------------|----------|---------|
| FITHAPPGEFNEVFNDVR                                             | +3     | 4.210      | 0.519      | 1.0000       | 3        |         |
| EASDPQPEDVDGGLK                                                | +2     | 3.505      | 0.436      | 0.9994       | 1        |         |
| DVQDSVTVSNEVQTAK                                               | +2     | 4.785      | 0.406      | 0.9998       | 3        |         |
| MASCOT:(PepMatched Observed.Hits Coverage) 6 3 7.32%           |        |            |            |              |          |         |
| Seq Charge ObservedMS ExpectedMS CalculatedMS PepScore PepHits |        |            |            |              |          |         |
| EASDPQPEDVDGGLK                                                | +2     | 778.86     | 1555.71    | 1555.70      | 0.01     | 52      |
| DVQDSVTVSNEVQTAK                                               | +2     | 860.43     | 1718.85    | 1718.83      | 0.02     | 96      |
| IQVHYEDGNVQLVSHK                                               | +3     | 677.02     | 2028.03    | 2028.01      | 0.02     | 49      |
| IEGYDDQVLITEHGDLGNSR                                           | +3     | 744.36     | 2230.07    | 2230.05      | 0.02     | 61      |
| LLLNNDNLLR                                                     | +2     | 599.35     | 1196.70    | 1196.69      | 0.01     | 55      |
| FTITPPTAQVGVK                                                  | +2     | 785.97     | 1569.93    | 1569.91      | 0.02     | 53      |

No. 558. Protein IPI00557328 Matched (SEQUEST MASCOT) Y Y emPAI Strategy.Hits 0.27 1 PepMatched(SEQUEST MASCOT) 2 2 SpectraMatched(SEQUEST MASCOT) 2 2  
 \*Des: 31 kDa protein

| Seq                                                            | Charge | Xcor   | Delta   | Proability | PepHits |    |
|----------------------------------------------------------------|--------|--------|---------|------------|---------|----|
| SEQUEST:(PepMatched Observed.Hits Coverage) 2 1 13.87%         |        |        |         |            |         |    |
| TSSGPGASSGPGGDHSDLIVR                                          | +3     | 3.549  | 0.582   | 1.0000     | 2       |    |
| VMLPNSPETLGQATPR                                               | +2     | 3.502  | 0.472   | 0.9996     | 1       |    |
| MASCOT:(PepMatched Observed.Hits Coverage) 2 1 13.87%          |        |        |         |            |         |    |
| Seq Charge ObservedMS ExpectedMS CalculatedMS PepScore PepHits |        |        |         |            |         |    |
| TSSGPGASSGPGGDHSDLIVR                                          | +3     | 651.98 | 1952.93 | 1952.92    | 0.01    | 42 |
| VMLPNSPETLGQATPR                                               | +2     | 855.96 | 1709.90 | 1709.88    | 0.02    | 77 |

No. 559. Protein IPI00476338 Matched (SEQUEST MASCOT) N Y emPAI Strategy.Hits 0.16 1 PepMatched(SEQUEST MASCOT) 0 2 SpectraMatched(SEQUEST MASCOT) 2 2  
 \*Des: PREDICTED: striatin, calmodulin binding protein 3

| Seq                                                            | Charge | ObservedMS | ExpectedMS | CalculatedMS | PepScore | PepHits |
|----------------------------------------------------------------|--------|------------|------------|--------------|----------|---------|
| SEQUEST:(PepMatched Observed.Hits Coverage) 2 1 3.46%          |        |            |            |              |          |         |
| MASCOT:(PepMatched Observed.Hits Coverage) 2 1 3.46%           |        |            |            |              |          |         |
| Seq Charge ObservedMS ExpectedMS CalculatedMS PepScore PepHits |        |            |            |              |          |         |
| AYIASAGADALAK                                                  | +2     | 611.33     | 1220.64    | 1220.64      | 0        | 48      |
| SASLDVEPIYTFR                                                  | +2     | 749.39     | 1496.76    | 1496.75      | 0.01     | 44      |

No. 560. Protein IPI00476266 Matched (SEQUEST MASCOT) N Y emPAI Strategy.Hits 0.02 1 PepMatched(SEQUEST MASCOT) 0 2 SpectraMatched(SEQUEST MASCOT) 4 4  
 \*Des: Protein tyrosine PhosPhatase, recePtor tyPe, Q isoform 2 Precursor

| Seq                                                            | Charge | ObservedMS | ExpectedMS | CalculatedMS | PepScore | PepHits |
|----------------------------------------------------------------|--------|------------|------------|--------------|----------|---------|
| SEQUEST:(PepMatched Observed.Hits Coverage) 2 1 0.93%          |        |            |            |              |          |         |
| MASCOT:(PepMatched Observed.Hits Coverage) 2 1 0.93%           |        |            |            |              |          |         |
| Seq Charge ObservedMS ExpectedMS CalculatedMS PepScore PepHits |        |            |            |              |          |         |
| TLGEGLSER                                                      | +2     | 480.7304   | 959.4462   | 960.4876     | -1.03    | 42      |
| DWQSVSVR                                                       | +2     | 488.7317   | 975.4488   | 975.4774     | -0.02    | 38      |

No. 561. Protein IPI00421782 Matched (SEQUEST MASCOT) Y Y emPAI Strategy.Hits 0.1 2 PepMatched(SEQUEST MASCOT) 2 2 SpectraMatched(SEQUEST MASCOT) 5 5  
 \*Des: Type II keratin Kb18

| Seq                                                   | Charge | Xcor | Delta | Proability | PepHits |
|-------------------------------------------------------|--------|------|-------|------------|---------|
| SEQUEST:(PepMatched Observed.Hits Coverage) 2 1 3.94% |        |      |       |            |         |
| Seq Charge Xcor Delta Proability PepHits              |        |      |       |            |         |

Identified Human Platelet Proteins

|                                            |        |            |            |              |        |    |          |         |
|--------------------------------------------|--------|------------|------------|--------------|--------|----|----------|---------|
| YEELQVTAGR                                 | +2     | 2.783      | 0.373      | 0.9981       | 1      |    |          |         |
| SRAEAEISWYQTKYEELQVTAGR                    | +3     |            | 5.936      | 0.537        | 1.0000 | 2  |          |         |
| MASCOT:(PepMatched Observed.Hits Coverage) |        | 2          | 2          | 4.45%        |        |    |          |         |
| Seq                                        | Charge | ObservedMS | ExpectedMS | CalculatedMS |        |    | Pepscore | PepHits |
| LVELEDALQKAK                               | +2     | 679.36     | 1356.70    | 1355.77      | 0.93   | 54 | 2        |         |
| SLDLDSIIAEVK                               | +2     | 651.86     | 1301.71    | 1301.71      | 0      | 67 | 4        |         |

No. 562. Protein IPI00190179 Matched (SEQUEST MASCOT) Y Y emPAI Strategy.Hits 0.52 4 PepMatched(SEQUEST MASCOT) 13 10 SpectraMatched(SEQUEST MASCOT) 20 12

\*Des: Glycogen phosphorylase, liver form

|                                             |        |            |            |              |         |      |          |         |
|---------------------------------------------|--------|------------|------------|--------------|---------|------|----------|---------|
| SEQUEST:(PepMatched Observed.Hits Coverage) |        | 13         | 6          | 26.93%       |         |      |          |         |
| Seq                                         | Charge | Xcor       | Delta      | Proability   | PepHits |      |          |         |
| GIVGVENVAELKK                               | +2     | 3.476      | 0.480      | 0.9998       | 2       |      |          |         |
| HLQIYEINQK                                  | +2     | 3.208      | 0.390      | 0.9991       | 2       |      |          |         |
| VIPATDLSEQISTAGTEASGTGNMK                   | +2     |            | 6.440      | 0.680        | 1.0000  | 2    |          |         |
| TFAYTNHTVLPEALER                            | +2     | 4.519      | 0.448      | 0.9999       | 3       |      |          |         |
| AWNTMVLR                                    | +2     | 3.049      | 0.252      | 0.9957       | 2       |      |          |         |
| LVTSAEVVNDPMPVGSK                           | +2     | 5.098      | 0.546      | 1.0000       | 3       |      |          |         |
| ARPEFMLPVHFGYGR                             | +3     | 3.878      | 0.358      | 0.9997       | 2       |      |          |         |
| EGWQVEEADDWLR                               | +2     | 3.673      | 0.447      | 0.9998       | 1       |      |          |         |
| DIINMLFYHDR                                 | +2     | 3.011      | 0.462      | 0.9996       | 2       |      |          |         |
| LVIDQIDNGFFSPNQPDFLK                        | +2     | 5.433      | 0.713      | 1.0000       | 3       |      |          |         |
| LKQEYFVVAATLQDVIR                           | +2     | 5.869      | 0.582      | 1.0000       | 2       |      |          |         |
| DVGTVFDAFPQVAIQLNDTHPALAIPELMR              | +4     |            | 5.483      | 0.533        | 1.0000  | 2    |          |         |
| APNDFNLQDFNVGDYIQAVALDR                     | +2     |            | 5.840      | 0.592        | 1.0000  | 2    |          |         |
| MASCOT:(PepMatched Observed.Hits Coverage)  |        | 10         | 5          | 17.57%       |         |      |          |         |
| Seq                                         | Charge | ObservedMS | ExpectedMS | CalculatedMS |         |      | Pepscore | PepHits |
| GIVGVENVAELKK                               | +2     | 678.40     | 1354.79    | 1354.78      | 0.01    | 46   | 2        |         |
| DFSELEPDKFQNK                               | +2     | 798.88     | 1595.75    | 1595.75      | 0       | 60   | 1        |         |
| AWNTMVLR                                    | +2     | 495.76     | 989.51     | 989.51       | 0       | 46   | 1        |         |
| HLQIYEINQK                                  | +2     | 699.33     | 1396.64    | 1397.77      | -1.12   | 55   | 2        |         |
| LVTSAEVVNDPMPVGSK                           | +2     | 929.99     | 1857.96    | 1857.95      | 0.01    | 88   | 2        |         |
| TFAYTNHTVLPEALER                            | +2     | 931.48     | 1860.94    | 1860.94      | 0       | 104  | 3        |         |
| EGWQVEEADDWLR                               | +2     | 816.87     | 1631.73    | 1631.72      | 0.01    | 74   | 1        |         |
| DIINMLFYHDR                                 | +2     | 718.86     | 1435.70    | 1435.69      | 0.01    | 49   | 2        |         |
| LKQEYFVVAATLQDVIR                           | +2     | 997.06     | 1992.11    | 1992.10      | 0.01    | 103  | 2        |         |
| APNDFNLQDFNVGDYIQAVALDR                     | +3     |            | 842.08     | 2523.22      | 2523.20 | 0.02 | 63       | 1       |

No. 563. Protein IPI00421857 Matched (SEQUEST MASCOT) Y Y emPAI Strategy.Hits 0.1 2 PepMatched(SEQUEST MASCOT) 3 5 SpectraMatched(SEQUEST MASCOT) 5 22

\*Des: Type II keratin Kb1

|                                             |        |       |       |            |         |  |  |  |
|---------------------------------------------|--------|-------|-------|------------|---------|--|--|--|
| SEQUEST:(PepMatched Observed.Hits Coverage) |        | 3     | 2     | 6.13%      |         |  |  |  |
| Seq                                         | Charge | Xcor  | Delta | Proability | PepHits |  |  |  |
| TNAENEFVTIKK                                | +2     | 3.057 | 0.384 | 0.9986     | 3       |  |  |  |
| LLRDYQELMNTK                                | +2     | 3.419 | 0.216 | 0.9757     | 2       |  |  |  |
| WELLQQVDTSTR                                | +2     | 2.898 | 0.371 | 0.9978     | 3       |  |  |  |
| MASCOT:(PepMatched Observed.Hits Coverage)  |        | 5     | 12    | 8.33%      |         |  |  |  |

Identified Human Platelet Proteins

| Seq                      | Charge | ObservedMS | ExpectedMS | CalculatedMS | Pepscore | PepHits |
|--------------------------|--------|------------|------------|--------------|----------|---------|
| TNAENEFVTIKK             | +2     | 697.3812   | 1392.7478  | 1392.7248    | 0.02     | 48      |
| SLNDKFASFIDKVR           | +3     | 546.9663   | 1637.8771  | 1638.8729    | -0.99    | 47      |
| FLEQQNQVLQTKWELLQQVDTSTR | +3     | 978.1982   | 2931.5727  | 2931.5090    | 0.06     | 58      |
| FLEQQNQVLQTK             | +2     | 738.4095   | 1474.8044  | 1474.7780    | 0.03     | 69      |
| FASFIDKVR                | +2     | 541.8123   | 1081.6100  | 1081.5920    | 0.02     | 47      |

No. 564. Protein IPI00369618 Matched (SEQUEST MASCOT) Y Y emPAI 0.59 Strategy.Hits 2 PepMatched(SEQUEST MASCOT) 9 SpectraMatched(SEQUEST MASCOT) 10 13 31

\*Des: Eukaryotic translation initiation factor 4A, isoform 1

| Seq                                         | Charge | Xcor  | Delta | Proability | PepHits |
|---------------------------------------------|--------|-------|-------|------------|---------|
| SEQUEST:(PepMatched Observed.Hits Coverage) |        |       |       | 9          | 2       |
| Seq                                         | Charge | Xcor  | Delta | Proability | PepHits |
| KGVAINMVTEEDKR                              | +3     | 4.088 | 0.320 | 0.9990     | 2       |
| DFTVSAMHGDMQK                               | +2     | 3.898 | 0.485 | 0.9999     | 1       |
| KEELTLEGIR                                  | +2     | 2.734 | 0.293 | 0.9910     | 2       |
| LQMEAPHIIVGTPGR                             | +3     | 3.968 | 0.468 | 0.9999     | 3       |
| GFKDQIYDIFQK                                | +2     | 2.992 | 0.489 | 0.9952     | 2       |
| LNSNTQVVLLSATMPSDVLEVTK                     | +2     | 5.012 | 0.582 | 1.0000     | 3       |
| DIETFYNTSIEEMPLNVADL                        | +2     | 4.218 | 0.623 | 1.0000     | 1       |
| TATFAISILQQIELDLK                           | +2     | 4.767 | 0.481 | 1.0000     | 3       |
| TATFAISILQQIELDLKATQALVLPTR                 | +3     | 6.818 | 0.647 | 1.0000     | 2       |

| Seq                                                                                                                   | Charge                                                                                                   | ObservedMS                                                                               | ExpectedMS                                                           | CalculatedMS                                    | Pepscore | PepHits |
|-----------------------------------------------------------------------------------------------------------------------|----------------------------------------------------------------------------------------------------------|------------------------------------------------------------------------------------------|----------------------------------------------------------------------|-------------------------------------------------|----------|---------|
| MASCOT:(PepMatched Observed.Hits Coverage)                                                                            |                                                                                                          |                                                                                          |                                                                      |                                                 |          |         |
| Seq <td>Charge <td>ObservedMS <td>ExpectedMS <td>CalculatedMS <td>Pepscore</td> <td>PepHits</td> </td></td></td></td> | Charge <td>ObservedMS <td>ExpectedMS <td>CalculatedMS <td>Pepscore</td> <td>PepHits</td> </td></td></td> | ObservedMS <td>ExpectedMS <td>CalculatedMS <td>Pepscore</td> <td>PepHits</td> </td></td> | ExpectedMS <td>CalculatedMS <td>Pepscore</td> <td>PepHits</td> </td> | CalculatedMS <td>Pepscore</td> <td>PepHits</td> | Pepscore | PepHits |
| GYDVIAQAQSGTGK                                                                                                        | +2                                                                                                       | 697.85                                                                                   | 1393.69                                                              | 1393.68                                         | 0.01     | 75      |
| KGVAINMVTEEDKR                                                                                                        | +3                                                                                                       | 530.62                                                                                   | 1588.83                                                              | 1588.82                                         | 0.01     | 41      |
| DFTVSAMHGDMQK                                                                                                         | +2                                                                                                       | 791.34                                                                                   | 1580.67                                                              | 1580.66                                         | 0.01     | 67      |
| KEELTLEGIR                                                                                                            | +2                                                                                                       | 594.28                                                                                   | 1186.54                                                              | 1186.66                                         | -0.11    | 43      |
| LQMEAPHIIVGTPGR                                                                                                       | +2                                                                                                       | 809.94                                                                                   | 1617.87                                                              | 1617.87                                         | 0        | 65      |
| GIYAYGF EKPSAIQQR                                                                                                     | +2                                                                                                       | 914.48                                                                                   | 1826.94                                                              | 1826.93                                         | 0.01     | 74      |
| VLITDLLAR                                                                                                             | +2                                                                                                       | 557.85                                                                                   | 1113.68                                                              | 1113.68                                         | 0        | 46      |
| MFVLDEADEMLSR                                                                                                         | +2                                                                                                       | 778.36                                                                                   | 1554.71                                                              | 1554.71                                         | 0        | 55      |
| GIDVQQVSLVINIDLPTNR                                                                                                   | +3                                                                                                       | 715.39                                                                                   | 2143.13                                                              | 2143.13                                         | 0        | 43      |
| TATFAISILQQIELDLK                                                                                                     | +2                                                                                                       | 952.54                                                                                   | 1903.06                                                              | 1903.07                                         | 0        | 82      |

No. 565. Protein IPI00382317 Matched (SEQUEST MASCOT) N Y emPAI 0.94 Strategy.Hits 3 PepMatched(SEQUEST MASCOT) 0 SpectraMatched(SEQUEST MASCOT) 26 0 182

\*Des: Ac1873

| Seq                                         | Charge | ObservedMS | ExpectedMS | CalculatedMS | Pepscore | PepHits |
|---------------------------------------------|--------|------------|------------|--------------|----------|---------|
| SEQUEST:(PepMatched Observed.Hits Coverage) |        |            |            |              |          |         |
| MASCOT:(PepMatched Observed.Hits Coverage)  |        |            |            |              |          |         |
| Seq                                         | Charge | ObservedMS | ExpectedMS | CalculatedMS | Pepscore | PepHits |
| VTSTGTSTTR                                  | +2     | 505.7622   | 1009.5099  | 1009.5040    | 0.01     | 70      |
| NNKDSNSLTR                                  | +2     | 574.7904   | 1147.5663  | 1147.5581    | 0.01     | 61      |
| TVLGNDGHR                                   | +2     | 484.7518   | 967.4891   | 967.4835     | 0.01     | 58      |
| GDLPGDSRGDSATR                              | +2     | 702.3346   | 1402.6546  | 1402.6436    | 0.01     | 44      |
| MADEAASEAHQEGDTR                            | +2     | 859.3647   | 1716.7149  | 1716.7009    | 0.01     | 94      |
| EINLKDYEGQQK                                | +2     | 732.8768   | 1463.7390  | 1463.7256    | 0.01     | 76      |
| GLIDEANQDFTNR                               | +2     | 746.8607   | 1491.7069  | 1491.6953    | 0.01     | 79      |

Identified Human Platelet Proteins

|                     |    |           |           |           |      |     |    |  |
|---------------------|----|-----------|-----------|-----------|------|-----|----|--|
| SQLQEGPPEWK         | +2 | 649.8266  | 1297.6386 | 1297.6302 | 0.01 | 59  | 20 |  |
| FGSLTSNFK           | +2 | 500.7615  | 999.5085  | 999.5025  | 0.01 | 49  | 8  |  |
| GLIDEANQDFTNRINK    | +2 | 924.4745  | 1846.9344 | 1846.9173 | 0.02 | 72  | 6  |  |
| AQQIQVLQK           | +2 | 528.3175  | 1054.6205 | 1054.6135 | 0.01 | 72  | 22 |  |
| MSPVPDLVPGSFK       | +2 | 687.3657  | 1372.7168 | 1372.7060 | 0.01 | 61  | 29 |  |
| IVERQPSQCK          | +2 | 594.3190  | 1186.6234 | 1186.6128 | 0.01 | 57  | 3  |  |
| TVLGNDGHREVVK       | +2 | 712.3924  | 1422.7702 | 1422.7579 | 0.01 | 65  | 4  |  |
| MELERPGKDGASR       | +2 | 723.3685  | 1444.7224 | 1444.7092 | 0.01 | 58  | 8  |  |
| AQQIQVLQKDVR        | +2 | 713.4180  | 1424.8215 | 1424.8099 | 0.01 | 65  | 2  |  |
| LVTSGDKKELLIGNEK    | +2 | 872.5020  | 1742.9895 | 1742.9777 | 0.01 | 91  | 26 |  |
| RLEVDIDIKIR         | +2 | 685.4185  | 1368.8225 | 1368.8089 | 0.01 | 51  | 13 |  |
| FGSLTSNFKEFGSK      | +2 | 774.8947  | 1547.7748 | 1547.7619 | 0.01 | 93  | 11 |  |
| MKGLIDEANQDFTNRINK  | +2 | 1054.0426 | 2106.0707 | 2106.0527 | 0.02 | 86  | 9  |  |
| VIEKAQQIQVLQK       | +2 | 762.9645  | 1523.9145 | 1523.9035 | 0.01 | 84  | 19 |  |
| QLEQVIAKELLPAKDR    | +3 | 617.6980  | 1850.0722 | 1850.0625 | 0.01 | 50  | 3  |  |
| GDLPGDSRGDSATRGPGSK | +3 | 610.6337  | 1828.8794 | 1828.8663 | 0.01 | 48  | 12 |  |
| KVIEKAQQIQVLQK      | +2 | 827.0121  | 1652.0096 | 1651.9984 | 0.01 | 104 | 16 |  |
| GLIDEANQDFTNRINKLK  | +2 | 1045.0616 | 2088.1087 | 2088.0963 | 0.01 | 48  | 4  |  |
| RIEILKR             | +2 | 464.3116  | 926.6086  | 926.6025  | 0.01 | 41  | 1  |  |

No. 566. Protein IPI00188111 Matched (SEQUEST MASCOT) Y N emPAI Strategy.Hits 0.13 1 PepMatched(SEQUEST MASCOT) 2 SpectraMatched(SEQUEST MASCOT) 8 0  
 \*Des: PREDICTED: similar to CCT (chaperonin containing TCP-1) zeta subunit  
 SEQUEST:(PepMatched Observed.Hits Coverage) 2 1 5.55%  
 Seq Charge Xcor Delta Probility PepHits  
 HKSETDTSLIR +2 2.876 0.371 0.9863 1  
 AQLGVQAFADALLIIPK +2 4.205 0.508 1.0000 7  
 MASCOT:(PepMatched Observed.Hits Coverage)

No. 567. Protein IPI00208203 Matched (SEQUEST MASCOT) Y Y emPAI Strategy.Hits 0.33 1 PepMatched(SEQUEST MASCOT) 2 SpectraMatched(SEQUEST MASCOT) 4 4  
 \*Des: Similar to Peci protein  
 SEQUEST:(PepMatched Observed.Hits Coverage) 2 1 7.03%  
 Seq Charge Xcor Delta Probility PepHits  
 GILVTSEGGITK +2 3.636 0.547 1.0000 4  
 ATQQDFENAMNQVK +2 4.208 0.451 0.9998 1  
 MASCOT:(PepMatched Observed.Hits Coverage) 2 1 7.03%  
 Seq Charge ObservedMS ExpectedMS CalculatedMS Pepscore PepHits  
 GILVTSEGGITK +2 587.84 1173.67 1173.66 0.01 66 4  
 ATQQDFENAMNQVK +2 812.38 1622.75 1622.74 0.01 85 1

No. 568. Protein IPI00359927 Matched (SEQUEST MASCOT) N Y emPAI Strategy.Hits 0.05 1 PepMatched(SEQUEST MASCOT) 0 SpectraMatched(SEQUEST MASCOT) 2 3  
 \*Des: PREDICTED: similar to stabilin-2  
 SEQUEST:(PepMatched Observed.Hits Coverage)  
 MASCOT:(PepMatched Observed.Hits Coverage) 2 1 1.46%  
 Seq Charge ObservedMS ExpectedMS CalculatedMS Pepscore PepHits

Identified Human Platelet Proteins

|                  |    |          |           |           |       |    |   |  |
|------------------|----|----------|-----------|-----------|-------|----|---|--|
| VTSGSAGVR        | +2 | 416.7420 | 831.4695  | 832.4402  | -0.96 | 35 | 3 |  |
| CPDGYIKVTSGSAGVR | +4 | 403.2113 | 1608.8161 | 1608.7929 | 0.02  | 37 | 3 |  |

No. 569. Protein IPI00189925 Matched (SEQUEST MASCOT) Y Y emPAI Strategy.Hits 1.15 3 PepMatched(SEQUEST MASCOT) 10 9 SpectraMatched(SEQUEST MASCOT) 17 11

\*Des: Alpha-soluble NSF attachment protein

SEQUEST:(PepMatched Observed.Hits Coverage) 10 3 49.66%

| Seq                     | Charge | Xcor  | Delta | Proability | PepHits  |
|-------------------------|--------|-------|-------|------------|----------|
| LLEAHEEQNVDSYTESVK      | +2     |       | 6.034 | 0.661      | 1.0000 3 |
| VAGYAAQLEQYQK           | +2     | 4.616 | 0.538 | 1.0000     | 3        |
| AI EIY TDMGR            | +2     | 2.902 | 0.400 | 0.9986     | 2        |
| QAEAMALLAEAEER          | +2     | 4.017 | 0.353 | 0.9993     | 1        |
| HHISIAEIYETELVDVEK      | +4     | 5.293 | 0.484 | 1.0000     | 3        |
| AIDIYEQVGT SAMDSPLLK    | +2     | 6.032 | 0.603 | 1.0000     | 3        |
| NSQSFFSGLFGGSSK         | +2     | 4.128 | 0.526 | 1.0000     | 1        |
| LDQWLTTMLLR             | +2     | 3.804 | 0.369 | 0.9995     | 1        |
| AIAHYEQSADYYKGEESNSSANK | +2     | 5.888 | 0.614 | 1.0000     | 4        |
| AIAHYEQSADYYK           | +2     | 3.799 | 0.502 | 0.9999     | 2        |

MASCOT:(PepMatched Observed.Hits Coverage) 9 4 42.66%

| Seq                     | Charge | ObservedMS | ExpectedMS | CalculatedMS | Pepscore | PepHits |
|-------------------------|--------|------------|------------|--------------|----------|---------|
| TIQGDEEDLR              | +2     | 587.83     | 1173.64    | 1174.55      | -0.9     | 43 1    |
| AIAHYEQSADYYK           | +2     | 779.87     | 1557.72    | 1557.71      | 0.01     | 44 2    |
| LLEAHEEQNVDSYTESVK      | +3     | 697.67     | 2089.99    | 2089.98      | 0.01     | 49 2    |
| AIAHYEQSADYYKGEESNSSANK | +3     | 854.72     | 2561.15    | 2561.13      | 0.02     | 53 1    |
| VAGYAAQLEQYQK           | +2     | 734.88     | 1467.74    | 1467.74      | 0        | 60 3    |
| AI EIY TDMGR            | +2     | 584.79     | 1167.56    | 1167.56      | 0        | 47 2    |
| QAEAMALLAEAEER          | +2     | 701.86     | 1401.70    | 1401.69      | 0.01     | 60 3    |
| NSQSFFSGLFGGSSK         | +2     | 775.37     | 1548.72    | 1548.72      | 0        | 103 1   |
| HHISIAEIYETELVDVEK      | +3     | 709.03     | 2124.08    | 2124.07      | 0.01     | 62 1    |

No. 570. Protein IPI00208205 Matched (SEQUEST MASCOT) Y Y emPAI Strategy.Hits 1.06 3 PepMatched(SEQUEST MASCOT) 13 20 SpectraMatched(SEQUEST MASCOT) 42 96

\*Des: Heat shock cognate 71 kDa protein

SEQUEST:(PepMatched Observed.Hits Coverage) 13 4 20.85%

| Seq                   | Charge | Xcor  | Delta | Proability | PepHits |
|-----------------------|--------|-------|-------|------------|---------|
| MKEIAEAYLGK           | +3     | 3.528 | 0.432 | 1.0000     | 7       |
| TVTNAVVTVPAYFNDSQR    | +3     | 3.515 | 0.384 | 0.9999     | 4       |
| DAGTIAGLNVLRL         | +2     | 3.640 | 0.298 | 0.9973     | 7       |
| SFYPEEVSSMVLTK        | +2     | 3.828 | 0.348 | 0.9986     | 4       |
| RFDDAVVQSDMK          | +2     | 3.413 | 0.522 | 1.0000     | 4       |
| NQVAMNPTNTVFDK        | +2     | 4.411 | 0.484 | 1.0000     | 1       |
| NQVAMNPTNTVFDK        | +2     | 4.444 | 0.505 | 1.0000     | 7       |
| SQIHDIIVLVGGSTR       | +2     | 4.396 | 0.597 | 1.0000     | 5       |
| MVNHFIAEFK            | +3     | 3.670 | 0.452 | 1.0000     | 12      |
| LDKSQIHDIIVLVGGSTR    | +3     | 3.505 | 0.284 | 0.9972     | 11      |
| DAKLDKSQIHDIIVLVGGSTR | +2     | 6.142 | 0.575 | 1.0000     | 10      |
| MVNHFIAEFKR           | +3     | 3.353 | 0.463 | 1.0000     | 1       |

Identified Human Platelet Proteins

| Seq                                                    | Charge | ObservedMS | ExpectedMS | CalculatedMS | Pepscore | PepHits |
|--------------------------------------------------------|--------|------------|------------|--------------|----------|---------|
| HWPFMVVNDAGRPK +3 4.202 0.558 1.0000 1                 |        |            |            |              |          |         |
| MASCOT:(PepMatched Observed.Hits Coverage) 20 6 33.78% |        |            |            |              |          |         |
| STAGDTHLGGEDFDNR                                       | +2     | 846.3734   | 1690.7323  | 1690.7183    | 0.01     | 70      |
| RFDDAVVQSDMK                                           | +2     | 705.8436   | 1409.6727  | 1409.6609    | 0.01     | 9       |
| DAGTIAGLNVLNR                                          | +2     | 600.3447   | 1198.6749  | 1198.6669    | 0.01     | 10      |
| FEELNADLFR                                             | +2     | 627.3157   | 1252.6169  | 1252.6087    | 0.01     | 6       |
| SFYPEEVSSMVLTK                                         | +2     | 808.8900   | 1615.7654  | 1615.7803    | 0        | 1       |
| VEIANDQGNR                                             | +2     | 614.8228   | 1227.6310  | 1227.6207    | 0.01     | 23      |
| MKEIAEAYLGK                                            | +2     | 626.8386   | 1251.6627  | 1251.6532    | 0.01     | 8       |
| TVTNAVVTVPAYFNDSQR                                     | +3     | 661.3420   | 1981.0041  | 1980.9904    | 0.01     | 41      |
| TTPSYVAFTDTER                                          | +2     | 744.3618   | 1486.7091  | 1486.6940    | 0.02     | 11      |
| NQVAMNPTNTVFDK                                         | +2     | 825.4089   | 1648.8033  | 1648.7879    | 0.02     | 65      |
| ARFEELNADLFR                                           | +2     | 740.8877   | 1479.7608  | 1479.7470    | 0.01     | 8       |
| LSKEDIER                                               | +2     | 495.2702   | 988.5259   | 988.5189     | 0.01     | 1       |
| VQVEYKGETK                                             | +2     | 590.8182   | 1179.6218  | 1179.6135    | 0.01     | 2       |
| NQVAMNPTNTVFDKR                                        | +2     | 903.4634   | 1804.9123  | 1804.8890    | 0.02     | 96      |
| MVNHFAEFK                                              | +2     | 618.3203   | 1234.6261  | 1234.6168    | 0.01     | 8       |
| SQIHDIIVLVGGSTR                                        | +2     | 741.4141   | 1480.8136  | 1480.7997    | 0.01     | 7       |
| ITITNDKGR                                              | +2     | 509.2917   | 1016.5688  | 1016.5614    | 0.01     | 11      |
| LDKSQIHDIIVLVGGSTR                                     | +2     | 919.5170   | 1837.0195  | 1837.0057    | 0.01     | 103     |
| DAKLDKSQIHDIIVLVGGSTR                                  | +2     | 1076.6019  | 2151.1893  | 2151.1647    | 0.02     | 117     |
| HWPFMVVNDAGRPK                                         | +3     | 551.9536   | 1652.8388  | 1652.8245    | 0.01     | 51      |

No. 571. Protein IPI00358046 Matched (SEQUEST MASCOT) Y Y emPAI Strategy.Hits 0.64 3 PepMatched(SEQUEST MASCOT) 11 SpectraMatched(SEQUEST MASCOT) 10 27 18

\*Des: PREDICTED: similar to actin related protein 2/3 complex subunit 2

| Seq                                                     | Charge | Xcor       | Delta      | Proability   | PepHits | Pepscore | PepHits |
|---------------------------------------------------------|--------|------------|------------|--------------|---------|----------|---------|
| SEQUEST:(PepMatched Observed.Hits Coverage) 11 3 44.13% |        |            |            |              |         |          |         |
| ASHTAPQVLFSHR                                           | +2     | 2.953      | 0.509      | 0.9992       | 2       |          |         |
| DSIVHQAGMLK                                             | +2     | 3.047      | 0.388      | 0.9976       | 5       |          |         |
| ELQAHGADELLK                                            | +2     | 3.778      | 0.419      | 0.9994       | 7       |          |         |
| YFQFQEEGKEGENR                                          | +2     | 4.689      | 0.471      | 0.9981       | 4       |          |         |
| IIEETLALK                                               | +2     | 3.150      | 0.367      | 0.9983       | 2       |          |         |
| DNTINLIHTFR                                             | +2     | 3.432      | 0.360      | 0.9982       | 3       |          |         |
| VTVVFSTVFK                                              | +2     | 3.259      | 0.535      | 0.9998       | 1       |          |         |
| VTVVFSTVFKDDDDVVIGK                                     | +2     | 5.974      | 0.558      | 1.0000       | 3       |          |         |
| RVYGSFLVNPESGYNVSLLYDLENLPASK                           | +3     | 5.529      | 0.546      | 1.0000       | 1       |          |         |
| DTDAAVGDNIGYITFVLFPR                                    | +2     | 6.091      | 0.645      | 1.0000       | 6       |          |         |
| DDETMYESK                                               | +2     | 3.003      | 0.484      | 0.9806       | 3       |          |         |
| MASCOT:(PepMatched Observed.Hits Coverage) 10 3 34.07%  |        |            |            |              |         |          |         |
| Seq                                                     | Charge | ObservedMS | ExpectedMS | CalculatedMS |         | Pepscore | PepHits |
| DSIVHQAGMLK                                             | +2     | 599.82     | 1197.62    | 1197.62      | 0       | 74       | 4       |
| DDETMYESK                                               | +2     | 607.82     | 1213.62    | 1215.50      | -1.87   | 55       | 3       |
| ELQAHGADELLK                                            | +2     | 662.35     | 1322.69    | 1322.68      | 0.01    | 67       | 6       |
| YFQFQEEGKEGENR                                          | +2     | 880.90     | 1759.79    | 1759.78      | 0.01    | 67       | 4       |
| VMVSISLK                                                | +2     | 438.77     | 875.52     | 875.51       | 0.01    | 43       | 1       |



Identified Human Platelet Proteins

|                      |        |        |         |         |      |    |   |  |
|----------------------|--------|--------|---------|---------|------|----|---|--|
| VFMQEFK+2            | 464.78 | 927.54 | 927.45  | 0.09    | 41   | 7  |   |  |
| IIEETLALK            | +2     | 515.31 | 1028.61 | 1028.61 | 0    | 67 | 2 |  |
| DNTINLIHTFR          | +2     | 672.36 | 1342.70 | 1342.70 | 0    | 54 | 3 |  |
| VTVVVFSTVFK          | +2     | 563.83 | 1125.65 | 1125.64 | 0.01 | 55 | 1 |  |
| DTDAAVGDNIGYITFVLFPR | +3     | 728.71 | 2183.10 | 2183.09 | 0.01 | 82 | 4 |  |

|       |                                                               |                          |            |               |                            |                                |                  |        |    |   |
|-------|---------------------------------------------------------------|--------------------------|------------|---------------|----------------------------|--------------------------------|------------------|--------|----|---|
| No.   | Protein                                                       | Matched (SEQUEST MASCOT) | emPAI      | Strategy.Hits | PepMatched(SEQUEST MASCOT) | SpectraMatched(SEQUEST MASCOT) |                  |        |    |   |
| 572.  | IPI00365192                                                   | Y                        | Y          | 0.27          | 2                          | 6                              | 3                | 8 10   |    |   |
| *Des: | PREDICTED: adaptor-related protein complex 1, gamma 1 subunit |                          |            |               |                            |                                |                  |        |    |   |
|       | SEQUEST:(PepMatched Observed.Hits Coverage)                   |                          |            |               | 6                          | 1                              | 12.75%           |        |    |   |
|       | Seq                                                           | Charge                   | Xcor       | Delta         | Proability                 | PepHits                        |                  |        |    |   |
|       | SPDMLAHFR                                                     | +2                       |            | 2.722         | 0.303                      | 0.9941                         | 1                |        |    |   |
|       | NLMSGYSPEHDVSGISDPFLQVR                                       |                          |            |               | +3                         | 4.538                          | 0.499            | 1.0000 | 1  |   |
|       | TFQLQLLSPSSSVVPAFNTGTITQVIK                                   |                          |            |               | +3                         | 4.649                          | 0.428            | 0.9999 | 1  |   |
|       | IGYLGAMLLLDER                                                 | +2                       |            | 3.255         | 0.315                      | 0.9964                         | 1                |        |    |   |
|       | NVGNAILYETVLTIMDIK                                            |                          |            | +2            | 5.534                      | 0.569                          | 1.0000           | 3      |    |   |
|       | VLTTAGSYVR                                                    | +2                       |            | 2.524         | 0.402                      | 0.9973                         | 3                |        |    |   |
|       | MASCOT:(PepMatched Observed.Hits Coverage)                    |                          |            |               | 3                          | 2                              | 7.62%            |        |    |   |
|       | Seq                                                           | Charge                   | ObservedMS | ExpectedMS    | CalculatedMS               |                                | Pepscore PepHits |        |    |   |
|       | VLTTAGSYVR                                                    | +2                       | 533.80     | 1065.58       | 1065.58                    | 0                              | 72               | 6      |    |   |
|       | NLMSGYSPEHDVSGISDPFLQVR                                       |                          |            | +3            | 887.78                     | 2660.31                        | 2660.29          | 0.02   | 75 | 2 |
|       | TFQLQLLSPSSSVVPAFNTGTITQVIK                                   |                          |            | +3            | 959.54                     | 2875.60                        | 2875.57          | 0.03   | 41 | 2 |

|       |                                                            |                          |       |               |                            |                                |        |     |  |  |
|-------|------------------------------------------------------------|--------------------------|-------|---------------|----------------------------|--------------------------------|--------|-----|--|--|
| No.   | Protein                                                    | Matched (SEQUEST MASCOT) | emPAI | Strategy.Hits | PepMatched(SEQUEST MASCOT) | SpectraMatched(SEQUEST MASCOT) |        |     |  |  |
| 573.  | IPI00207335                                                | Y                        | N     | 0.55          | 1                          | 2                              | 0      | 4 0 |  |  |
| *Des: | Platelet-activating factor acetylhydrolase IB beta subunit |                          |       |               |                            |                                |        |     |  |  |
|       | SEQUEST:(PepMatched Observed.Hits Coverage)                |                          |       |               | 2                          | 1                              | 12.87% |     |  |  |
|       | Seq                                                        | Charge                   | Xcor  | Delta         | Proability                 | PepHits                        |        |     |  |  |
|       | IIVLGLLPR                                                  | +2                       |       | 3.307         | 0.371                      | 0.9997                         | 3      |     |  |  |
|       | ELFSPLHALNFGIGGDTR                                         |                          |       | +2            | 4.330                      | 0.486                          | 1.0000 | 3   |  |  |
|       | MASCOT:(PepMatched Observed.Hits Coverage)                 |                          |       |               |                            |                                |        |     |  |  |

|       |                                             |                          |            |               |                            |                                |                  |     |  |
|-------|---------------------------------------------|--------------------------|------------|---------------|----------------------------|--------------------------------|------------------|-----|--|
| No.   | Protein                                     | Matched (SEQUEST MASCOT) | emPAI      | Strategy.Hits | PepMatched(SEQUEST MASCOT) | SpectraMatched(SEQUEST MASCOT) |                  |     |  |
| 574.  | IPI00193662                                 | N                        | Y          | 0.13          | 1                          | 0                              | 2                | 0 2 |  |
| *Des: | PREDICTED: similar to ELMO1                 |                          |            |               |                            |                                |                  |     |  |
|       | SEQUEST:(PepMatched Observed.Hits Coverage) |                          |            |               | 2                          | 1                              | 2.83%            |     |  |
|       | MASCOT:(PepMatched Observed.Hits Coverage)  |                          |            |               | 2                          | 1                              | 2.83%            |     |  |
|       | Seq                                         | Charge                   | ObservedMS | ExpectedMS    | CalculatedMS               |                                | Pepscore PepHits |     |  |
|       | MDPQDQAQR                                   | +2                       | 544.7440   | 1087.4734     | 1087.4716                  | 0                              | 50               | 1   |  |
|       | QEMANILAQK                                  | +2                       | 572.6348   | 1143.2550     | 1144.5910                  | -1.33                          | 48               | 1   |  |

|       |                                             |                          |       |               |                            |                                |        |       |  |
|-------|---------------------------------------------|--------------------------|-------|---------------|----------------------------|--------------------------------|--------|-------|--|
| No.   | Protein                                     | Matched (SEQUEST MASCOT) | emPAI | Strategy.Hits | PepMatched(SEQUEST MASCOT) | SpectraMatched(SEQUEST MASCOT) |        |       |  |
| 575.  | IPI00212014                                 | Y                        | Y     | 0.76          | 3                          | 15                             | 12     | 25 24 |  |
| *Des: | Transitional endoplasmic reticulum ATPase   |                          |       |               |                            |                                |        |       |  |
|       | SEQUEST:(PepMatched Observed.Hits Coverage) |                          |       |               | 15                         | 4                              | 32.11% |       |  |
|       | Seq                                         | Charge                   | Xcor  | Delta         | Proability                 | PepHits                        |        |       |  |
|       | AHVIVMAATNRPNSIDPALR                        | +2                       |       |               | 3.329                      | 0.430                          | 0.9993 | 3     |  |

Identified Human Platelet Proteins

| Seq                                        | Charge | ObservedMS | ExpectedMS | CalculatedMS | Pepscore | PepHits          |
|--------------------------------------------|--------|------------|------------|--------------|----------|------------------|
| EVDIGIPDATGR                               | +2     | 2.928      | 0.404      | 0.9985       | 3        |                  |
| WALSQSNPSALR                               | +2     | 3.375      | 0.443      | 0.9996       | 1        |                  |
| KYEMFAQTLQQSR                              | +2     | 4.490      | 0.393      | 0.9998       | 3        |                  |
| ELQELVQYPVEHPDK                            | +2     | 4.209      | 0.519      | 0.9999       | 3        |                  |
| QTNPSAMEVEEDDPVPEIR                        | +2     | 5.207      | 0.581      | 1.0000       | 1        |                  |
| LIVDEAINEDNSVVSLSQPK                       | +2     | 6.282      | 0.595      | 1.0000       | 2        |                  |
| MDELQLFR                                   | +2     | 2.969      | 0.427      | 0.9996       | 1        |                  |
| VINQILTEMDGMSTK+2                          |        | 5.000      | 0.571      | 1.0000       | 2        |                  |
| NVFIIGATNRPDIIDPAILRPGR                    | +3     | 4.045      | 0.501      | 1.0000       | 2        |                  |
| LDQLIYIPLPDEK                              | +2     | 3.786      | 0.370      | 0.9994       | 2        |                  |
| IVSQLLTLMDGLK                              | +2     | 3.545      | 0.495      | 0.9998       | 2        |                  |
| AVANETGAFFFLINGPEIMSK                      | +2     | 5.754      | 0.614      | 1.0000       | 3        |                  |
| NAPAIIFIDELDAIAPK                          | +2     | 4.633      | 0.554      | 1.0000       | 4        |                  |
| KMDLIDLEDETIDAEMNSLAVTMDDFR                | +3     | 5.349      | 0.487      | 1.0000       | 1        |                  |
| MASCOT:(PepMatched Observed.Hits Coverage) |        | 12         | 5          | 20.31%       |          |                  |
| Seq                                        | Charge | ObservedMS | ExpectedMS | CalculatedMS |          | Pepscore PepHits |
| EVDIGIPDATGR                               | +2     | 622.32     | 1242.63    | 1241.63      | 1        | 55 4             |
| WALSQSNPSALR                               | +2     | 665.35     | 1328.69    | 1328.68      | 0.01     | 72 1             |
| KYEMFAQTLQQSR                              | +2     | 815.41     | 1628.80    | 1628.80      | 0        | 80 3             |
| GDIFLVR                                    | +2     | 410.24     | 818.47     | 818.46       | 0.01     | 44 1             |
| LEILQIHTK                                  | +2     | 547.84     | 1093.66    | 1093.65      | 0.01     | 46 1             |
| ELQELVQYPVEHPDK                            | +2     | 912.47     | 1822.93    | 1822.91      | 0.02     | 75 2             |
| MDELQLFR                                   | +2     | 526.27     | 1050.52    | 1050.52      | 0        | 60 1             |
| LDQLIYIPLPDEK                              | +2     | 778.94     | 1555.86    | 1555.85      | 0.01     | 73 2             |
| VINQILTEMDGMSTK+2                          |        | 840.42     | 1678.83    | 1678.83      | 0        | 85 2             |
| IVSQLLTLMDGLK                              | +2     | 715.92     | 1429.83    | 1429.82      | 0.01     | 64 2             |
| NAPAIIFIDELDAIAPK                          | +2     | 906.01     | 1810.01    | 1809.99      | 0.02     | 94 4             |
| AVANETGAFFFLINGPEIMSK                      | +3     | 752.72     | 2255.12    | 2255.13      | 0        | 54 2             |

No. 576. Protein IPI00566223 Matched (SEQUEST MASCOT) N Y emPAI Strategy.Hits 0.28 1 0 2 0 2 SpectraMatched(SEQUEST MASCOT) 2

\*Des: 51 kDa protein

| Seq                                         | Charge | ObservedMS | ExpectedMS | CalculatedMS | Pepscore | PepHits          |
|---------------------------------------------|--------|------------|------------|--------------|----------|------------------|
| SEQUEST:(PepMatched Observed.Hits Coverage) |        |            |            |              |          |                  |
| MASCOT:(PepMatched Observed.Hits Coverage)  |        | 2          | 1          | 5.05%        |          |                  |
| Seq                                         | Charge | ObservedMS | ExpectedMS | CalculatedMS |          | Pepscore PepHits |
| TTPIEAASSGAR                                | +2     | 580.7562   | 1159.4979  | 1159.5833    | -0.08    | 41 1             |
| TEHINIHLR                                   | +2     | 630.8500   | 1259.6855  | 1259.6734    | 0.01     | 41 1             |

No. 577. Protein IPI00211216 Matched (SEQUEST MASCOT) Y Y emPAI Strategy.Hits 1.23 2 3 4 12 8 SpectraMatched(SEQUEST MASCOT) 8

\*Des: PREDICTED: similar to eukaryotic translation initiation factor 5A

| Seq                                         | Charge | Xcor  | Delta | Probability | PepHits |
|---------------------------------------------|--------|-------|-------|-------------|---------|
| SEQUEST:(PepMatched Observed.Hits Coverage) |        | 3     | 3     | 24.84%      |         |
| Seq                                         | Charge | Xcor  | Delta | Probability | PepHits |
| VHLVGIDIFTGKK                               | +3     | 3.831 | 0.867 | 1.0000      | 2       |
| VHLVGIDIFTGK                                | +2     | 2.651 | 0.806 | 1.0000      | 3       |
| RNDFQLIGIQDGYLSLLQDSGEVR                    | +3     | 6.298 | 0.709 | 1.0000      | 1       |
| MASCOT:(PepMatched Observed.Hits Coverage)  |        | 4     | 3     | 24.84%      |         |

Identified Human Platelet Proteins

| Seq                      | Charge | ObservedMS | ExpectedMS | CalculatedMS | Pepscore | PepHits |
|--------------------------|--------|------------|------------|--------------|----------|---------|
| VHLVGIDIFTGKK            | +3     | 476.29     | 1425.84    | 1425.83      | 0.01     | 4       |
| VHLVGIDIFTGK             | +2     | 649.88     | 1297.74    | 1297.74      | 0        | 2       |
| NDFQLIGIQDGYLSLLQDSGEVR  | +3     |            | 860.77     | 2579.29      | 2579.29  | 0       |
| RNDFQLIGIQDGYLSLLQDSGEVR | +3     |            | 912.81     | 2735.40      | 2735.39  | 0.01    |

No. 578. Protein IPI00194396 Matched (SEQUEST MASCOT) Y N emPAI 0.3 Strategy.Hits 1 PepMatched (SEQUEST MASCOT) 2 SpectraMatched (SEQUEST MASCOT) 0

\*Des: PREDICTED: similar to Cops7b protein

SEQUEST:(PepMatched Observed.Hits Coverage) 2 1 10.06%

| Seq               | Charge | Xcor  | Delta | Probability | PepHits |
|-------------------|--------|-------|-------|-------------|---------|
| ELEDLIEAVYTDIIQGK | +3     |       | 4.282 | 0.303       | 0.9991  |
| ESLPELSAAQQNK     | +2     | 3.223 | 0.403 | 0.9994      | 3       |

MASCOT:(PepMatched Observed.Hits Coverage)

No. 579. Protein IPI00193595 Matched (SEQUEST MASCOT) Y N emPAI 0.29 Strategy.Hits 2 PepMatched (SEQUEST MASCOT) 5 SpectraMatched (SEQUEST MASCOT) 0

\*Des: Eukaryotic translation initiation factor 4A2

SEQUEST:(PepMatched Observed.Hits Coverage) 5 4 18.55%

| Seq               | Charge | Xcor  | Delta | Probability | PepHits |
|-------------------|--------|-------|-------|-------------|---------|
| GYDVIAQAQSGTGK    | +2     | 3.748 | 0.553 | 1.0000      | 3       |
| GIYAYGFEEKPSAIQQR | +2     |       | 4.730 | 0.515       | 1.0000  |
| VLITDDLAR         | +2     | 3.298 | 0.419 | 0.9997      | 1       |
| GIDVQVSLVINYLPTNR | +3     | 3.810 | 0.442 | 0.9997      | 3       |
| MFVLDEADEMLSR     | +2     | 3.483 | 0.346 | 0.9986      | 1       |

MASCOT:(PepMatched Observed.Hits Coverage)

No. 580. Protein IPI00211075 Matched (SEQUEST MASCOT) Y Y emPAI 0.55 Strategy.Hits 4 PepMatched (SEQUEST MASCOT) 11 SpectraMatched (SEQUEST MASCOT) 13

\*Des: Contrapsin-like protease inhibitor 6 precursor

SEQUEST:(PepMatched Observed.Hits Coverage) 11 6 48.94%

| Seq                           | Charge | Xcor  | Delta | Probability | PepHits |
|-------------------------------|--------|-------|-------|-------------|---------|
| MQQVEASLQPETLR                | +2     | 4.839 | 0.497 | 1.0000      | 2       |
| DTFQSEFYSGK                   | +2     | 2.762 | 0.485 | 0.9995      | 1       |
| AVLDVAETGTEAAAATGVK           | +2     | 5.276 | 0.687 | 1.0000      | 2       |
| ALYQAEAFATDFQQR               | +3     | 4.867 | 0.507 | 1.0000      | 3       |
| EVFSTQADLSGITGDKDLMVSVVHK     | +3     | 4.515 | 0.447 | 0.9974      | 2       |
| DEIQISTGNALFIEK               | +2     | 3.986 | 0.354 | 0.9992      | 1       |
| DSLRRPSMIDELYLPK              | +3     | 4.889 | 0.508 | 1.0000      | 1       |
| TSMVLVNIYFK                   | +2     | 3.431 | 0.457 | 0.9998      | 2       |
| FSISADYNLEDVLPGLIK            | +2     | 5.420 | 0.586 | 1.0000      | 1       |
| NVVFSPSISAALAVVSLGAK          | +2     | 7.263 | 0.668 | 1.0000      | 5       |
| LDPLIIAFDRPFLMIISDTETAIAPFLAK | +3     | 5.793 | 0.560 | 1.0000      | 3       |

MASCOT:(PepMatched Observed.Hits Coverage) 9 4 36.94%

| Seq            | Charge | ObservedMS | ExpectedMS | CalculatedMS | Pepscore | PepHits |
|----------------|--------|------------|------------|--------------|----------|---------|
| MQQVEASLQPETLR | +2     | 815.42     | 1628.82    | 1628.82      | 0        | 94      |
| LQVLAEFQEK     | +2     | 603.08     | 1204.15    | 1203.65      | 0.5      | 43      |

Identified Human Platelet Proteins

|                           |    |        |         |         |      |     |   |
|---------------------------|----|--------|---------|---------|------|-----|---|
| AVLDVAETGTEAAAATGVK       | +2 | 887.47 | 1772.93 | 1772.92 | 0.01 | 81  | 4 |
| TSMVLVNYIYFK              | +2 | 739.40 | 1476.78 | 1476.77 | 0.01 | 47  | 2 |
| DEIQISTGNALFIEK           | +2 | 839.44 | 1676.87 | 1676.86 | 0.01 | 54  | 1 |
| DSLRRPSMIDELYLPK          | +3 | 592.98 | 1775.92 | 1775.91 | 0.01 | 47  | 2 |
| ALYQAEAFATDFQQSR          | +2 | 923.45 | 1844.88 | 1844.87 | 0.01 | 105 | 3 |
| EVFSTQADLSGITGDKDLMVSVVHK | +3 | 935.48 | 2803.42 | 2803.41 | 0.01 | 58  | 2 |
| NVVFSPSLSAALAVVSLGAK      | +3 | 681.74 | 2042.18 | 2042.18 | 0    | 70  | 3 |

|          |                                                                               |                          |        |               |                            |                                |      |
|----------|-------------------------------------------------------------------------------|--------------------------|--------|---------------|----------------------------|--------------------------------|------|
| No. 581. | Protein                                                                       | Matched (SEQUEST MASCOT) | emPAI  | Strategy.Hits | PepMatched(SEQUEST MASCOT) | SpectraMatched(SEQUEST MASCOT) |      |
|          | IPI00200651                                                                   | Y Y                      | 0.78   | 1             | 4 3 5                      | 4                              |      |
| *Des:    | PREDICTED: similar to N-acetylneuraminic acid synthase (sialic acid synthase) |                          |        |               |                            |                                |      |
|          | SEQUEST:(PepMatched Observed.Hits Coverage)                                   | 4                        | 1      | 18.58%        |                            |                                |      |
|          | Seq Charge Xcor Delta Probility PepHits                                       |                          |        |               |                            |                                |      |
|          | VGSGDTNFPYLEK                                                                 | +2                       | 3.609  | 0.402         | 0.9993                     | 2                              |      |
|          | GSDHLASLEPGELAELVR                                                            | +2                       | 4.572  | 0.592         | 1.0000                     | 3                              |      |
|          | IPAGTILTDMLTVK                                                                | +2                       | 4.738  | 0.550         | 1.0000                     | 1                              |      |
|          | LFPDIPIGYSGHETGIAISVAVALGAK                                                   | +3                       | 3.132  | 0.267         | 0.9856                     | 1                              |      |
|          | MASCOT:(PepMatched Observed.Hits Coverage)                                    | 3                        | 1      | 11.76%        |                            |                                |      |
|          | Seq Charge ObservedMS ExpectedMS CalculatedMS                                 |                          |        |               |                            | Pepscore PepHits               |      |
|          | VGSGDTNFPYLEK                                                                 | +2                       | 770.88 | 1539.74       | 1539.72                    | 0.02                           | 60 2 |
|          | GSDHLASLEPGELAELVR                                                            | +2                       | 947.00 | 1891.98       | 1891.96                    | 0.02                           | 68 2 |
|          | IPAGTILTDMLTVK                                                                | +2                       | 793.47 | 1584.92       | 1584.92                    | 0                              | 71 1 |

|          |                                               |                          |          |               |                            |                                |      |
|----------|-----------------------------------------------|--------------------------|----------|---------------|----------------------------|--------------------------------|------|
| No. 582. | Protein                                       | Matched (SEQUEST MASCOT) | emPAI    | Strategy.Hits | PepMatched(SEQUEST MASCOT) | SpectraMatched(SEQUEST MASCOT) |      |
|          | IPI00326433                                   | N Y                      | 1        | 1             | 0 3 0                      | 6                              |      |
| *Des:    | 10 kDa heat shock protein, mitochondrial      |                          |          |               |                            |                                |      |
|          | SEQUEST:(PepMatched Observed.Hits Coverage)   | 3                        | 1        | 37.86%        |                            |                                |      |
|          | MASCOT:(PepMatched Observed.Hits Coverage)    | 3                        | 1        | 37.86%        |                            |                                |      |
|          | Seq Charge ObservedMS ExpectedMS CalculatedMS |                          |          |               |                            | Pepscore PepHits               |      |
|          | VLLPEYGGTK                                    | +2                       | 538.8362 | 1075.6578     | 1075.5913                  | 0.07                           | 51 4 |
|          | VLQATVVAVGSGGK                                | +2                       | 643.4171 | 1284.8196     | 1284.7401                  | 0.08                           | 65 3 |
|          | VVLDDKDYFLFR                                  | +2                       | 765.4527 | 1528.8908     | 1528.7925                  | 0.1                            | 46 2 |

|          |                                                          |                          |       |               |                            |                                |
|----------|----------------------------------------------------------|--------------------------|-------|---------------|----------------------------|--------------------------------|
| No. 583. | Protein                                                  | Matched (SEQUEST MASCOT) | emPAI | Strategy.Hits | PepMatched(SEQUEST MASCOT) | SpectraMatched(SEQUEST MASCOT) |
|          | IPI00388209                                              | Y N                      | 0.21  | 1             | 2 0 2                      | 0                              |
| *Des:    | PREDICTED: similar to alpha glucosidase II, beta subunit |                          |       |               |                            |                                |
|          | SEQUEST:(PepMatched Observed.Hits Coverage)              | 2                        | 1     | 5.8%          |                            |                                |
|          | Seq Charge Xcor Delta Probility PepHits                  |                          |       |               |                            |                                |
|          | SLEDQVETLR                                               | +2                       | 2.840 | 0.303         | 0.9943                     | 1                              |
|          | MPPYDEETQAIIDAAQEAR                                      | +3                       | 3.908 | 0.265         | 0.9972                     | 1                              |
|          | MASCOT:(PepMatched Observed.Hits Coverage)               | 2                        | 1     | 5.8%          |                            |                                |

|          |                                             |                          |       |               |                            |                                |
|----------|---------------------------------------------|--------------------------|-------|---------------|----------------------------|--------------------------------|
| No. 584. | Protein                                     | Matched (SEQUEST MASCOT) | emPAI | Strategy.Hits | PepMatched(SEQUEST MASCOT) | SpectraMatched(SEQUEST MASCOT) |
|          | IPI00200653                                 | Y Y                      | 0.3   | 2             | 4 3 7                      | 16                             |
| *Des:    | SLP-76 adaptor ptoein                       |                          |       |               |                            |                                |
|          | SEQUEST:(PepMatched Observed.Hits Coverage) | 4                        | 2     | 11.61%        |                            |                                |
|          | Seq Charge Xcor Delta Probility PepHits     |                          |       |               |                            |                                |

|       |                               | Identified Human Platelet Proteins          |        |               |                            |                                |         |    |    |          |         |
|-------|-------------------------------|---------------------------------------------|--------|---------------|----------------------------|--------------------------------|---------|----|----|----------|---------|
|       |                               | SEVLAWNPDLADYFR                             | +2     | 4.720         | 0.568                      | 1.0000                         | 4       |    |    |          |         |
|       |                               | GKEDFLSVSDIIDYFR                            | +2     | 4.475         | 0.647                      | 1.0000                         | 1       |    |    |          |         |
|       |                               | LSQDINKNEERR                                | +3     | 3.715         | 0.210                      | 0.9900                         | 2       |    |    |          |         |
|       |                               | FLNLTENDIQKFPK                              | +2     | 4.283         | 0.431                      | 0.9989                         | 3       |    |    |          |         |
|       |                               | MASCOT:(PepMatched Observed.Hits Coverage)  |        | 3             | 2                          | 9.17%                          |         |    |    |          |         |
|       |                               | Seq                                         | Charge | ObservedMS    | ExpectedMS                 | CalculatedMS                   |         |    |    | PepScore | PepHits |
|       |                               | SEVLAWNPDLADYFR                             | +2     | 955.4639      | 1908.9133                  | 1908.9006                      | 0.01    | 71 |    | 10       |         |
|       |                               | GKEDFLSVSDIIDYFR                            | +2     | 952.9867      | 1903.9588                  | 1902.9363                      | 1.02    | 83 |    | 2        |         |
|       |                               | FLNLTENDIQKFPK                              | +2     | 853.9680      | 1705.9214                  | 1705.9039                      | 0.02    | 66 |    | 8        |         |
| No.   | Protein                       | Matched (SEQUENT MASCOT)                    | emPAI  | Strategy.Hits | PepMatched(SEQUENT MASCOT) | SpectraMatched(SEQUENT MASCOT) |         |    |    |          |         |
| 585.  | IPI00561215                   | N                                           | Y      | 0.22          | 2                          | 0                              | 7       | 0  | 49 |          |         |
| *Des: | 50 kDa protein                |                                             |        |               |                            |                                |         |    |    |          |         |
|       |                               | SEQUENT:(PepMatched Observed.Hits Coverage) |        |               |                            |                                |         |    |    |          |         |
|       |                               | MASCOT:(PepMatched Observed.Hits Coverage)  |        | 7             | 2                          | 20.61%                         |         |    |    |          |         |
|       |                               | Seq                                         | Charge | ObservedMS    | ExpectedMS                 | CalculatedMS                   |         |    |    | PepScore | PepHits |
|       |                               | DVNAAIATIK                                  | +2     | 508.2916      | 1014.5686                  | 1014.5709                      | 0       | 47 | 6  |          |         |
|       |                               | NLDIERPTYTNLNR                              | +2     | 859.9444      | 1717.8742                  | 1717.8747                      | 0       | 38 | 6  |          |         |
|       |                               | FDLMYAK+2                                   |        | 444.2191      | 886.4236                   | 886.4258                       | 0       | 41 | 3  |          |         |
|       |                               | EIIDLVLR                                    | +2     | 543.3129      | 1084.6112                  | 1084.6128                      | 0       | 38 | 4  |          |         |
|       |                               | IHFPLATYAPVISA EK                           | +2     | 878.9840      | 1755.9535                  | 1755.9559                      | 0       | 37 |    | 9        |         |
|       |                               | AVCMLSNTTAIAEAWAR                           | +2     | 904.4464      | 1806.8783                  | 1806.8756                      | 0       | 75 |    | 29       |         |
|       |                               | LISQIVSSITASLR                              | +3     | 496.6295      | 1486.8668                  | 1486.8719                      | 0       | 46 | 18 |          |         |
| No.   | Protein                       | Matched (SEQUENT MASCOT)                    | emPAI  | Strategy.Hits | PepMatched(SEQUENT MASCOT) | SpectraMatched(SEQUENT MASCOT) |         |    |    |          |         |
| 586.  | IPI00561142                   | N                                           | Y      | 0.2           | 1                          | 0                              | 2       | 0  | 2  |          |         |
| *Des: | 46 kDa protein                |                                             |        |               |                            |                                |         |    |    |          |         |
|       |                               | SEQUENT:(PepMatched Observed.Hits Coverage) |        |               |                            |                                |         |    |    |          |         |
|       |                               | MASCOT:(PepMatched Observed.Hits Coverage)  |        | 2             | 1                          | 6.06%                          |         |    |    |          |         |
|       |                               | Seq                                         | Charge | ObservedMS    | ExpectedMS                 | CalculatedMS                   |         |    |    | PepScore | PepHits |
|       |                               | ISFDLSLR                                    | +2     | 511.29        | 1020.57                    | 1020.56                        | 0.01    | 46 | 1  |          |         |
|       |                               | LLFEYLTFLGIDDK                              | +2     | 843.96        | 1685.90                    | 1685.89                        | 0.01    | 67 | 1  |          |         |
| No.   | Protein                       | Matched (SEQUENT MASCOT)                    | emPAI  | Strategy.Hits | PepMatched(SEQUENT MASCOT) | SpectraMatched(SEQUENT MASCOT) |         |    |    |          |         |
| 587.  | IPI00369550                   | Y                                           | N      | 0.02          | 1                          | 2                              | 0       | 7  | 0  |          |         |
| *Des: | PREDICTED: similar to Ab2-162 |                                             |        |               |                            |                                |         |    |    |          |         |
|       |                               | SEQUENT:(PepMatched Observed.Hits Coverage) |        | 2             | 1                          | 12.5%                          |         |    |    |          |         |
|       |                               | Seq                                         | Charge | Xcor          | Delta                      | Probability                    | PepHits |    |    |          |         |
|       |                               | QNYSTEVEAAVNR                               | +2     | 4.111         | 0.489                      | 1.0000                         | 2       |    |    |          |         |
|       |                               | NLNQALLDLHALGSAR                            | +2     | 4.759         | 0.536                      | 1.0000                         | 5       |    |    |          |         |
|       |                               | MASCOT:(PepMatched Observed.Hits Coverage)  |        |               |                            |                                |         |    |    |          |         |
| No.   | Protein                       | Matched (SEQUENT MASCOT)                    | emPAI  | Strategy.Hits | PepMatched(SEQUENT MASCOT) | SpectraMatched(SEQUENT MASCOT) |         |    |    |          |         |
| 588.  | IPI00421791                   | Y                                           | N      | 0.02          | 1                          | 2                              | 0       | 2  | 0  |          |         |
| *Des: | Type I keratin KA22           |                                             |        |               |                            |                                |         |    |    |          |         |
|       |                               | SEQUENT:(PepMatched Observed.Hits Coverage) |        | 2             | 1                          | 5.21%                          |         |    |    |          |         |
|       |                               | Seq                                         | Charge | Xcor          | Delta                      | Probability                    | PepHits |    |    |          |         |

Identified Human Platelet Proteins

TKYETELNLR +2 2.621 0.371 0.9916 2  
 NRKDAEEWFFTK +3 3.191 0.229 0.9956 2

MASCOT:(PepMatched Observed.Hits Coverage)

No. Protein Matched (SEQUEST MASCOT) emPAI Strategy.Hits PepMatched(SEQUEST MASCOT) SpectraMatched(SEQUEST MASCOT)  
 589. IPI00561146 N Y 0.3 1 0 2 0 3  
 \*Des: PREDICTED: similar to Eukaryotic translation initiation factor 3 subunit 2 (eIF-3 beta) (eIF3 p36) (eIF3i) (TGF-beta receptor interacting protein 1) (TRIP-1)

SEQUEST:(PepMatched Observed.Hits Coverage)

MASCOT:(PepMatched Observed.Hits Coverage) 2 1 12.3%  

| Seq           | Charge | ObservedMS | ExpectedMS | CalculatedMS | Pepscore | PepHits |
|---------------|--------|------------|------------|--------------|----------|---------|
| DPSQIDSNEPYMK | +2     | 762.35     | 1522.68    | 1522.66      | 0.02     | 60 2    |
| QINDIQLSR     | +2     | 543.80     | 1085.59    | 1085.58      | 0.01     | 45 1    |

No. Protein Matched (SEQUEST MASCOT) emPAI Strategy.Hits PepMatched(SEQUEST MASCOT) SpectraMatched(SEQUEST MASCOT)  
 590. IPI00369480 Y N 0.51 1 2 0 2 0  
 \*Des: PREDICTED: similar to HSPC263

SEQUEST:(PepMatched Observed.Hits Coverage)

MASCOT:(PepMatched Observed.Hits Coverage) 2 1 10.35%  

| Seq                | Charge | Xcor  | Delta | Proability | PepHits |
|--------------------|--------|-------|-------|------------|---------|
| LLTSGYLQR          | +2     | 2.591 | 0.342 | 0.9945     | 3       |
| GEGGTTNPHVFPEGSEPK | +2     | 3.978 | 0.464 | 0.9998     | 2       |

MASCOT:(PepMatched Observed.Hits Coverage)

No. Protein Matched (SEQUEST MASCOT) emPAI Strategy.Hits PepMatched(SEQUEST MASCOT) SpectraMatched(SEQUEST MASCOT)  
 591. IPI00372700 Y N 0.08 1 2 0 2 0  
 \*Des: PREDICTED: aminopeptidase puromycin sensitive

SEQUEST:(PepMatched Observed.Hits Coverage)

MASCOT:(PepMatched Observed.Hits Coverage) 2 1 4.48%  

| Seq                    | Charge | Xcor  | Delta | Proability | PepHits |
|------------------------|--------|-------|-------|------------|---------|
| VTLSPSTLQTGTGLK        | +2     | 2.909 | 0.403 | 0.9976     | 1       |
| IDLIAIDFAAGAMENWGLVTYR | +3     | 4.306 | 0.496 | 1.0000     | 1       |

MASCOT:(PepMatched Observed.Hits Coverage)

No. Protein Matched (SEQUEST MASCOT) emPAI Strategy.Hits PepMatched(SEQUEST MASCOT) SpectraMatched(SEQUEST MASCOT)  
 592. IPI00369628 Y Y 0.37 4 11 7 20 12  
 \*Des: PREDICTED: similar to arachidonate 12-lipoxygenase

SEQUEST:(PepMatched Observed.Hits Coverage)

MASCOT:(PepMatched Observed.Hits Coverage) 11 8 24.85%  

| Seq                         | Charge | Xcor  | Delta | Proability | PepHits |
|-----------------------------|--------|-------|-------|------------|---------|
| LEDFDQIFWGQK                | +2     | 3.777 | 0.530 | 1.0000     | 1       |
| SWNRLEDFDQIFWGQK            | +2     | 4.784 | 0.552 | 1.0000     | 2       |
| GKEEEFDVAEDLGPLQFVK         | +3     | 3.312 | 0.216 | 0.9676     | 1       |
| TKAVLSQFQADLENLEKEITAR      | +3     | 5.477 | 0.619 | 1.0000     | 1       |
| EITEVGLCHAQDR               | +2     | 3.725 | 0.372 | 0.9990     | 1       |
| LVLPPGTEELQAQLEK            | +2     | 3.482 | 0.494 | 0.9996     | 2       |
| MPPPTS KDDVTMETIMGSLPDVQK   | +3     | 3.607 | 0.458 | 1.0000     | 3       |
| TQLISDGGIFDQVVSTGGGGHVQLLTR | +3     | 4.395 | 0.526 | 1.0000     | 4       |
| AGVLEMGLKR                  | +2     | 2.961 | 0.294 | 0.9937     | 7       |
| LWLVGAHR                    | +2     | 2.821 | 0.340 | 0.9974     | 5       |

Identified Human Platelet Proteins

| No.   | Protein                                                           | Matched (SEQUEST MASCOT) | emPAI      | Strategy.Hits | PepMatched(SEQUEST MASCOT) | SpectraMatched(SEQUEST MASCOT) |     |   |          |         |
|-------|-------------------------------------------------------------------|--------------------------|------------|---------------|----------------------------|--------------------------------|-----|---|----------|---------|
| 593.  | IPI00196210                                                       | N                        | Y          | 0.04          | 1                          | 0                              | 2   | 0 | 6        |         |
| *Des: | PREDICTED: similar to probable ATP-dependent RNA helicase - mouse |                          |            |               |                            |                                |     |   |          |         |
|       | SEQUEST:(PepMatched Observed.Hits Coverage)                       |                          |            |               |                            |                                |     |   |          |         |
|       | MASCOT:(PepMatched Observed.Hits Coverage)                        | 2                        | 1          | 2.18%         |                            |                                |     |   |          |         |
|       | Seq                                                               | Charge                   | ObservedMS | ExpectedMS    | CalculatedMS               |                                |     |   | PepScore | PepHits |
|       | LEDFDQIFWGQK                                                      | +2                       | 763.3755   | 1524.7364     | 1524.7249                  | 0.01                           | 67  | 2 |          |         |
|       | EITEVGLCHAQDR                                                     | +2                       | 735.8590   | 1469.7035     | 1469.6932                  | 0.01                           | 70  | 1 |          |         |
|       | TQLISDGGIFDQVVSTGGGGHVQLLTR                                       | +3                       | 919.1568   | 2754.4486     | 2754.4300                  | 0.02                           | 77  | 1 |          |         |
|       | LWLVGAHR                                                          | +2                       | 476.2825   | 950.5504      | 950.5450                   | 0.01                           | 44  | 4 |          |         |
|       | SALAEKVHR                                                         | +2                       | 505.7947   | 1009.5749     | 1009.5668                  | 0.01                           | 44  | 1 |          |         |
|       | AGVLEMGLKR                                                        | +2                       | 537.3131   | 1072.6117     | 1072.6062                  | 0.01                           | 64  | 6 |          |         |
|       | SRTQLISDGGIFDQVVSTGGGGHVQLLTR                                     | +4                       | 750.4052   | 2997.5917     | 2997.5631                  | 0.03                           | 91  | 3 |          |         |
| No.   | Protein                                                           | Matched (SEQUEST MASCOT) | emPAI      | Strategy.Hits | PepMatched(SEQUEST MASCOT) | SpectraMatched(SEQUEST MASCOT) |     |   |          |         |
| 594.  | IPI00231610                                                       | Y                        | Y          | 0.32          | 2                          | 2                              | 10  | 2 | 11       |         |
| *Des: | Calpain-1 catalytic subunit                                       |                          |            |               |                            |                                |     |   |          |         |
|       | SEQUEST:(PepMatched Observed.Hits Coverage)                       |                          |            |               |                            |                                |     |   |          |         |
|       | Seq                                                               | Charge                   | Xcor       | Delta         | Probability                | PepHits                        |     |   |          |         |
|       | DKELGLGRHENAIAK                                                   | +2                       | 3.333      | 0.407         | 0.9924                     | 1                              |     |   |          |         |
|       | ELAGQPVHLKR                                                       | +2                       | 2.943      | 0.407         | 0.9976                     | 4                              |     |   |          |         |
|       | MASCOT:(PepMatched Observed.Hits Coverage)                        |                          |            |               |                            |                                |     |   |          |         |
|       | Seq                                                               | Charge                   | ObservedMS | ExpectedMS    | CalculatedMS               |                                |     |   | PepScore | PepHits |
|       | LAGDDMEISVK                                                       | +2                       | 589.29     | 1176.57       | 1176.57                    | 0                              | 47  | 2 |          |         |
|       | VLSEEEIDDNFK                                                      | +2                       | 719.34     | 1436.67       | 1436.67                    | 0                              | 57  | 1 |          |         |
|       | GPWSDNSYEWNK                                                      | +2                       | 741.82     | 1481.62       | 1481.62                    | 0                              | 57  | 1 |          |         |
|       | AGTQELDDQIQANLPDEK                                                | +2                       | 992.98     | 1983.95       | 1983.94                    | 0.01                           | 107 | 1 |          |         |
|       | APSDLYQIILK                                                       | +2                       | 630.86     | 1259.71       | 1259.71                    | 0                              | 42  | 2 |          |         |
|       | NWNTTFYEGTWR                                                      | +2                       | 788.76     | 1575.51       | 1573.69                    | 1.82                           | 57  | 1 |          |         |
|       | DMETIGFAVYQVPR                                                    | +2                       | 813.40     | 1624.79       | 1624.79                    | 0                              | 41  | 3 |          |         |
|       | LPPGEYIVVPSTFEPNKEGDFLLR                                          | +3                       | 906.48     | 2716.42       | 2716.41                    | 0.01                           | 48  | 1 |          |         |
|       | ILDTDLDGVVTFDLFK                                                  | +2                       | 905.98     | 1809.94       | 1809.94                    | 0                              | 105 | 1 |          |         |
|       | LVFVHSAQGNFWSALLEK                                                | +3                       | 725.71     | 2174.11       | 2174.12                    | 0                              | 64  | 1 |          |         |
| No.   | Protein                                                           | Matched (SEQUEST MASCOT) | emPAI      | Strategy.Hits | PepMatched(SEQUEST MASCOT) | SpectraMatched(SEQUEST MASCOT) |     |   |          |         |
| 595.  | IPI00287835                                                       | N                        | Y          | 1.6           | 1                          | 0                              | 2   | 0 | 4        |         |
| *Des: | Hemoglobin alpha-1 and alpha-2 chains                             |                          |            |               |                            |                                |     |   |          |         |
|       | SEQUEST:(PepMatched Observed.Hits Coverage)                       |                          |            |               |                            |                                |     |   |          |         |
|       | MASCOT:(PepMatched Observed.Hits Coverage)                        |                          |            |               |                            |                                |     |   |          |         |
|       | Seq                                                               | Charge                   | ObservedMS | ExpectedMS    | CalculatedMS               |                                |     |   | PepScore | PepHits |
|       | IGGHGGEYGEELQR                                                    | +2                       | 786.8735   | 1571.7324     | 1571.7327                  | 0                              | 62  | 3 |          |         |

Identified Human Platelet Proteins

AADHVEDLPGALSTLSDLHAHK +3 766.3866 2296.1380 2296.1447 0 43 2

No. 596. Protein IPI00373505 Matched (SEQUEST MASCOT) Y Y emPAI Strategy.Hits 0.32 1 PepMatched(SEQUEST MASCOT) 3 SpectraMatched(SEQUEST MASCOT) 3 6 7

\*Des: Tropomodulin 3

| SEQUEST:(PepMatched Observed.Hits Coverage) |        | 3          | 1          | 14.24%       |                     |
|---------------------------------------------|--------|------------|------------|--------------|---------------------|
| Seq                                         | Charge | Xcor       | Delta      | Probility    | PepHits             |
| SNDPVAAAFADMLK+2                            |        |            | 3.253      | 0.576        | 1.0000 4            |
| DLGDYKDLDEDELLGKLTSESELK                    |        | +3         |            | 4.938        | 0.503 1.0000 1      |
| LG YQFTQQGPR                                |        | +2         | 3.065      | 0.418        | 0.9989 5            |
| MASCOT:(PepMatched Observed.Hits Coverage)  |        | 3          | 1          | 10.05%       |                     |
| Seq                                         | Charge | ObservedMS | ExpectedMS | CalculatedMS | Pepscore PepHits    |
| SNDPVAAAFADMLK+2                            |        | 725.3569   | 1448.6993  | 1448.6969 0  | 63 2                |
| LG YQFTQQGPR                                |        | +2         | 647.8353   | 1293.6561    | 1293.6465 0.01 57 4 |
| HFSLAATR                                    |        | +2         | 451.7489   | 901.4833     | 901.4770 0.01 49 1  |

No. 597. Protein IPI00373432 Matched (SEQUEST MASCOT) N Y emPAI Strategy.Hits 0.32 1 PepMatched(SEQUEST MASCOT) 0 SpectraMatched(SEQUEST MASCOT) 3 0 8

\*Des: PREDICTED: small inducible cytokine subfamily E, member 1

| SEQUEST:(PepMatched Observed.Hits Coverage) |        | 3          | 1          | 14.33%       |                   |
|---------------------------------------------|--------|------------|------------|--------------|-------------------|
| Seq                                         | Charge | ObservedMS | ExpectedMS | CalculatedMS | Pepscore PepHits  |
| AILQATLR                                    |        | +2         | 443.28     | 884.55       | 884.54 0.01 46 4  |
| TVVSGLVNHVPLEQMQNR                          |        | +3         | 674.36     | 2020.06      | 2020.05 0.01 58 4 |
| ITFDAFPGEPAKELNPK                           |        | +2         | 959.99     | 1917.97      | 1916.95 1.02 45 5 |

No. 598. Protein IPI00560349 Matched (SEQUEST MASCOT) N Y emPAI Strategy.Hits 0.22 1 PepMatched(SEQUEST MASCOT) 0 SpectraMatched(SEQUEST MASCOT) 2 0 8

\*Des: Protein

| SEQUEST:(PepMatched Observed.Hits Coverage) |        | 2          | 1          | 6.64%        |                     |
|---------------------------------------------|--------|------------|------------|--------------|---------------------|
| Seq                                         | Charge | ObservedMS | ExpectedMS | CalculatedMS | Pepscore PepHits    |
| FRHENIIGINDIIR                              |        | +2         | 855.4830   | 1708.9514    | 1708.9372 0.01 47 7 |
| MLTFNPHKR                                   |        | +2         | 572.3125   | 1142.6104    | 1142.6019 0.01 44 2 |

No. 599. Protein IPI00208213 Matched (SEQUEST MASCOT) Y Y emPAI Strategy.Hits 1.47 1 PepMatched(SEQUEST MASCOT) 2 SpectraMatched(SEQUEST MASCOT) 4 5 8

\*Des: ZW10 interactor

| SEQUEST:(PepMatched Observed.Hits Coverage) |        | 2          | 1          | 10.33%       |                    |
|---------------------------------------------|--------|------------|------------|--------------|--------------------|
| Seq                                         | Charge | Xcor       | Delta      | Probility    | PepHits            |
| AFEQLEAK                                    |        | +2         | 2.973      | 0.262        | 0.9955 2           |
| NAVAEENAVAEENAVADK                          |        | +2         |            | 6.647        | 0.610 1.0000 4     |
| MASCOT:(PepMatched Observed.Hits Coverage)  |        | 4          | 1          | 19.55%       |                    |
| Seq                                         | Charge | ObservedMS | ExpectedMS | CalculatedMS | Pepscore PepHits   |
| AFEQLEAK                                    |        | +2         | 468.25     | 934.49       | 934.48 0.01 50 1   |
| LDGSHQELETLEK                               |        | +2         | 685.36     | 1368.70      | 1368.69 0.01 43 2  |
| NAVAEENAVAEENAVADK                          |        | +2         | 922.45     | 1842.89      | 1842.86 0.03 139 4 |



Identified Human Platelet Proteins

ATYMDHVDVIK +2 646.31 1290.60 1290.63 -0.02 47 2

No. Protein Matched (SEQUEST MASCOT) emPAI Strategy.Hits PepMatched(SEQUEST MASCOT) SpectraMatched(SEQUEST MASCOT)  
 600. IPI00358052 Y Y 0.94 1 4 5 17 28

\*Des: 30 kDa protein

| SEQUEST:(PepMatched Observed.Hits Coverage) |             | 4          | 2          | 26.88%       |                  |     |    |
|---------------------------------------------|-------------|------------|------------|--------------|------------------|-----|----|
| Seq                                         | Charge Xcor | Delta      | Probility  | PepHits      |                  |     |    |
| EVAEAYEVLSDK                                | +2          | 3.115      | 0.493      | 0.9997       | 1                |     |    |
| SVSINGVPDDLALGLELSR                         | +2          | 4.806      | 0.537      | 1.0000       | 2                |     |    |
| EFFGSGDPFSELFDDLGAFFSELQNGGSR               | +3          | 5.080      | 0.550      | 1.0000       | 1                |     |    |
| SVSTSTTFVQGR                                | +2          | 3.455      | 0.584      | 1.0000       | 1                |     |    |
| MASCOT:(PepMatched Observed.Hits Coverage)  |             | 5          | 2          | 26.88%       |                  |     |    |
| Seq                                         | Charge      | ObservedMS | ExpectedMS | CalculatedMS | Pepscore PepHits |     |    |
| VEVEEDGQLK                                  | +2          | 573.29     | 1144.57    | 1144.56      | 0.01             | 49  | 3  |
| SVSTSTTFVQGR                                | +2          | 635.33     | 1268.64    | 1268.64      | 0                | 71  | 6  |
| FKEVAEAYEVLSDK                              | +2          | 814.42     | 1626.83    | 1626.81      | 0.02             | 117 | 2  |
| SVSINGVPDDLALGLELSR                         | +2          | 978.04     | 1954.06    | 1954.04      | 0.02             | 66  | 9  |
| SETGGMPEGFTTFR                              | +2          | 832.38     | 1662.75    | 1662.73      | 0.02             | 98  | 14 |

No. Protein Matched (SEQUEST MASCOT) emPAI Strategy.Hits PepMatched(SEQUEST MASCOT) SpectraMatched(SEQUEST MASCOT)  
 601. IPI00366218 Y Y 0.35 2 10 9 11 15

\*Des: Chaperonin containing TCP1, subunit 2

| SEQUEST:(PepMatched Observed.Hits Coverage) |             | 10         | 3          | 33.82%       |                  |    |   |
|---------------------------------------------|-------------|------------|------------|--------------|------------------|----|---|
| Seq                                         | Charge Xcor | Delta      | Probility  | PepHits      |                  |    |   |
| EALLSSAVDHGSDEVK                            | +2          | 4.345      | 0.516      | 1.0000       | 1                |    |   |
| GATQQILDEAER                                | +2          | 3.928      | 0.354      | 0.9995       | 2                |    |   |
| ILIANTGMDTDKIK                              | +2          | 3.945      | 0.452      | 0.9977       | 2                |    |   |
| LIEEVMIGEDK                                 | +2          | 3.172      | 0.420      | 0.9995       | 2                |    |   |
| LGGSLADSYLDEGFLLDK                          | +2          | 3.270      | 0.249      | 0.9859       | 1                |    |   |
| MLPTIADNAGYDSADLVAQLR                       | +3          | 5.030      | 0.394      | 0.9997       | 1                |    |   |
| QVLLSAAEAAEVILR                             | +2          | 3.378      | 0.478      | 0.9997       | 2                |    |   |
| LSSFIGAIAIGDLVK                             | +2          | 4.654      | 0.453      | 0.9999       | 1                |    |   |
| VQDDEVGDGTTSVTVLAAELLR                      | +3          | 4.928      | 0.475      | 0.9999       | 1                |    |   |
| QLIYNYPEQLFGAAGVMAIEHADFAFVER               | +3          | 5.488      | 0.544      | 1.0000       | 1                |    |   |
| MASCOT:(PepMatched Observed.Hits Coverage)  |             | 9          | 3          | 26.47%       |                  |    |   |
| Seq                                         | Charge      | ObservedMS | ExpectedMS | CalculatedMS | Pepscore PepHits |    |   |
| GATQQILDEAER                                | +2          | 665.83     | 1329.66    | 1329.65      | 0.01             | 60 | 2 |
| ILIANTGMDTDKIK                              | +2          | 766.93     | 1531.84    | 1531.83      | 0.01             | 63 | 2 |
| EALLSSAVDHGSDEVK                            | +2          | 828.91     | 1655.80    | 1655.80      | 0                | 64 | 1 |
| LAVEAVLR                                    | +2          | 435.77     | 869.53     | 869.53       | 0                | 46 | 1 |
| LIEEVMIGEDK                                 | +2          | 638.33     | 1274.65    | 1274.64      | 0.01             | 60 | 2 |
| MLPTIADNAGYDSADLVAQLR                       | +3          | 783.07     | 2346.19    | 2346.19      | 0                | 50 | 1 |
| LSSFIGAIAIGDLVK                             | +2          | 752.44     | 1502.87    | 1502.87      | 0                | 62 | 1 |
| QVLLSAAEAAEVILR                             | +2          | 791.96     | 1581.91    | 1581.91      | 0                | 57 | 2 |
| VQDDEVGDGTTSVTVLAAELLR                      | +3          | 763.39     | 2287.16    | 2287.15      | 0.01             | 51 | 1 |

No. Protein Matched (SEQUEST MASCOT) emPAI Strategy.Hits PepMatched(SEQUEST MASCOT) SpectraMatched(SEQUEST MASCOT)

Identified Human Platelet Proteins

|       |                                                                           |                          |            |               |                            |                                |        |                   |    |
|-------|---------------------------------------------------------------------------|--------------------------|------------|---------------|----------------------------|--------------------------------|--------|-------------------|----|
| 602.  | IPI00373436                                                               | Y                        | Y          | 0.25          | 1                          | 2                              | 3      | 3                 | 4  |
| *Des: | PREDICTED: similar to adaptor protein DAPP1                               |                          |            |               |                            |                                |        |                   |    |
|       | SEQUEST:(PepMatched Observed.Hits Coverage)                               |                          |            |               | 2                          | 2                              | 6.48%  |                   |    |
|       | Seq                                                                       | Charge                   | Xcor       | Delta         | Proability                 | PepHits                        |        |                   |    |
|       | HAAEALLLSNGR                                                              | +2                       |            | 3.396         | 0.538                      | 1.0000                         |        | 3                 |    |
|       | TENDLVPTAPSLGTK                                                           | +2                       |            |               | 3.470                      | 0.352                          |        | 0.9987 1          |    |
|       | MASCOT:(PepMatched Observed.Hits Coverage)                                |                          |            |               | 3                          | 2                              | 11.18% |                   |    |
|       | Seq                                                                       | Charge                   | ObservedMS |               | ExpectedMS                 | CalculatedMS                   |        | Pepscore PepHits  |    |
|       | HAAEALLLSNGR                                                              | +2                       | 626.35     |               | 1250.69                    | 1250.67                        |        | 0.02 66 3         |    |
|       | TENDLVPTAPSLGTK                                                           | +2                       |            |               | 771.91                     | 1541.81                        |        | 1541.79 0.02 44 1 |    |
|       | ADGGSDFQDLGWYHSNLTR                                                       | +3                       |            |               | 751.93                     | 2252.76                        |        | 2251.03 1.73 41 1 |    |
| No.   | Protein                                                                   | Matched (SEQUEST MASCOT) | emPAI      | Strategy.Hits | PepMatched(SEQUEST MASCOT) | SpectraMatched(SEQUEST MASCOT) |        |                   |    |
| 603.  | IPI00208215                                                               | N                        | Y          | 0.32          | 1                          | 0                              | 2      | 0                 | 2  |
| *Des: | PRx III                                                                   |                          |            |               |                            |                                |        |                   |    |
|       | SEQUEST:(PepMatched Observed.Hits Coverage)                               |                          |            |               | 2                          | 1                              | 9.54%  |                   |    |
|       | MASCOT:(PepMatched Observed.Hits Coverage)                                |                          |            |               | 2                          | 1                              | 9.54%  |                   |    |
|       | Seq                                                                       | Charge                   | ObservedMS |               | ExpectedMS                 | CalculatedMS                   |        | Pepscore PepHits  |    |
|       | HLSVNDLPVGR                                                               | +2                       | 603.8700   |               | 1205.7254                  | 1205.6516                      |        | 0.07 51 1         |    |
|       | GLFIIDPNGVIK                                                              | +2                       | 643.4263   |               | 1284.8380                  | 1284.7441                      |        | 0.09 38 1         |    |
| No.   | Protein                                                                   | Matched (SEQUEST MASCOT) | emPAI      | Strategy.Hits | PepMatched(SEQUEST MASCOT) | SpectraMatched(SEQUEST MASCOT) |        |                   |    |
| 604.  | IPI00358127                                                               | Y                        | N          | 0.18          | 2                          | 3                              | 0      | 6                 | 0  |
| *Des: | PREDICTED: similar to actin-related protein 3-beta                        |                          |            |               |                            |                                |        |                   |    |
|       | SEQUEST:(PepMatched Observed.Hits Coverage)                               |                          |            |               | 3                          | 3                              | 8.94%  |                   |    |
|       | Seq                                                                       | Charge                   | Xcor       | Delta         | Proability                 | PepHits                        |        |                   |    |
|       | NIVLSGGSTMFR                                                              | +2                       |            | 3.765         | 0.444                      | 0.9998                         |        | 2                 |    |
|       | HGIVEDWDLMER                                                              | +2                       |            | 3.191         | 0.608                      | 1.0000                         |        | 3                 |    |
|       | DITYFIQQLLR                                                               | +2                       |            | 3.642         | 0.411                      | 0.9997                         |        | 3                 |    |
|       | MASCOT:(PepMatched Observed.Hits Coverage)                                |                          |            |               | 3                          | 1                              | 12.46% |                   |    |
| No.   | Protein                                                                   | Matched (SEQUEST MASCOT) | emPAI      | Strategy.Hits | PepMatched(SEQUEST MASCOT) | SpectraMatched(SEQUEST MASCOT) |        |                   |    |
| 605.  | IPI00363816                                                               | N                        | Y          | 0.62          | 1                          | 0                              | 3      | 0                 | 3  |
| *Des: | PREDICTED: similar to Williams-Beuren syndrome critical region protein 21 |                          |            |               |                            |                                |        |                   |    |
|       | SEQUEST:(PepMatched Observed.Hits Coverage)                               |                          |            |               | 3                          | 1                              | 12.46% |                   |    |
|       | MASCOT:(PepMatched Observed.Hits Coverage)                                |                          |            |               | 3                          | 1                              | 12.46% |                   |    |
|       | Seq                                                                       | Charge                   | ObservedMS |               | ExpectedMS                 | CalculatedMS                   |        | Pepscore PepHits  |    |
|       | AVDIPENIPHSR                                                              | +2                       | 674.36     |               | 1346.71                    | 1346.69                        |        | 0.02 44 4         |    |
|       | LADEQLSSVVK                                                               | +2                       | 594.83     |               | 1187.65                    | 1187.64                        |        | 0.01 57 2         |    |
|       | QFLLTNLVEVNGR                                                             | +2                       | 752.41     |               | 1502.81                    | 1501.83                        |        | 0.98 42 1         |    |
| No.   | Protein                                                                   | Matched (SEQUEST MASCOT) | emPAI      | Strategy.Hits | PepMatched(SEQUEST MASCOT) | SpectraMatched(SEQUEST MASCOT) |        |                   |    |
| 606.  | IPI00365348                                                               | Y                        | Y          | 0.32          | 3                          | 13                             | 14     | 19                | 33 |
| *Des: | PREDICTED: RAS p21 protein activator 3                                    |                          |            |               |                            |                                |        |                   |    |
|       | SEQUEST:(PepMatched Observed.Hits Coverage)                               |                          |            |               | 13                         | 5                              | 17.2%  |                   |    |
|       | Seq                                                                       | Charge                   | Xcor       | Delta         | Proability                 | PepHits                        |        |                   |    |
|       | QVIAGVGTLEQEHAQYR                                                         | +2                       |            |               | 4.684                      | 0.570                          |        | 1.0000 4          |    |

Identified Human Platelet Proteins

| Seq                                        | Charge | ObservedMS | ExpectedMS | CalculatedMS | PepScore | PepHits |   |
|--------------------------------------------|--------|------------|------------|--------------|----------|---------|---|
| LKDGENLENNMESLR                            | +2     | 4.559      | 0.350      | 0.9892       | 2        |         |   |
| SHFDFFEEEDVDKLEIR                          | +3     | 3.742      | 0.483      | 0.9993       | 2        |         |   |
| VDLWNASNLK                                 | +2     | 3.460      | 0.486      | 0.9999       | 2        |         |   |
| NMFQVIQPER                                 | +2     | 2.994      | 0.403      | 0.9683       | 3        |         |   |
| DTWFQLQHVDADSEVQGK                         | +2     | 4.822      | 0.625      | 1.0000       | 2        |         |   |
| SVYDGPQEYESTFIIDDPQETYK                    | +3     | 4.117      | 0.318      | 0.9989       | 1        |         |   |
| LNVVYTEDHVFSSSEYYSPLR                      | +3     | 4.400      | 0.625      | 1.0000       | 2        |         |   |
| FGDEFLGELR                                 | +2     | 3.375      | 0.330      | 0.9988       | 1        |         |   |
| NFLDLISSGR                                 | +2     | 3.010      | 0.331      | 0.9969       | 2        |         |   |
| YASSYEAWYFLQPR                             | +3     | 2.899      | 0.378      | 0.9992       | 2        |         |   |
| IYSLFNLYMGK                                | +2     | 3.031      | 0.639      | 1.0000       | 1        |         |   |
| ESYMATFYEFFNEQK                            | +2     | 3.841      | 0.471      | 0.9998       | 2        |         |   |
| MASCOT:(PepMatched Observed.Hits Coverage) |        | 14         | 5          | 15.76%       |          |         |   |
| Seq                                        | Charge | ObservedMS | ExpectedMS | CalculatedMS |          |         |   |
| TIQTLGSLSK                                 | +2     | 524.31     | 1046.60    | 1046.60      | 0        | 53      | 2 |
| DGENLENNMESLR                              | +2     | 760.84     | 1519.66    | 1519.66      | 0        | 49      | 4 |
| LKDGENLENNMESLR                            | +2     | 881.43     | 1760.84    | 1760.84      | 0        | 101     | 4 |
| QVIAGVGTLEQEHAQYR                          | +2     | 950.00     | 1897.98    | 1897.96      | 0.02     | 111     | 8 |
| VDLWNASNLK                                 | +2     | 580.31     | 1158.61    | 1158.60      | 0.01     | 69      | 2 |
| NMFQVIQPER                                 | +2     | 630.37     | 1258.73    | 1260.63      | -1.89    | 53      | 3 |
| SHFDFFEEEDVDKLEIR                          | +3     | 669.99     | 2006.95    | 2006.92      | 0.03     | 42      | 2 |
| DTWFQLQHVDADSEVQGK                         | +3     | 701.67     | 2101.98    | 2101.97      | 0.01     | 54      | 1 |
| FGDEFLGELR                                 | +2     | 591.80     | 1181.58    | 1181.57      | 0.01     | 62      | 2 |
| NFLDLISSGR                                 | +2     | 604.82     | 1207.62    | 1207.62      | 0        | 56      | 4 |
| LNVVYTEDHVFSSSEYYSPLR                      | +3     | 806.73     | 2417.16    | 2417.15      | 0.01     | 48      | 2 |
| YTAVSSFIFLR                                | +2     | 652.36     | 1302.70    | 1302.70      | 0        | 42      | 2 |
| IYSLFNLYMGK                                | +2     | 674.86     | 1347.70    | 1347.69      | 0.01     | 55      | 2 |
| ESYMATFYEFFNEQK                            | +2     | 967.43     | 1932.84    | 1932.82      | 0.02     | 59      | 4 |

No. 607. Protein IPI00197885 Matched (SEQUEST MASCOT) Y N emPAI Strategy.Hits 0.3 2 5 PepMatched(SEQUEST MASCOT) 0 13 SpectraMatched(SEQUEST MASCOT) 0

\*Des: Tubulin beta chain

| Seq                                         | Charge | Xcor  | Delta | Probability | PepHits    |
|---------------------------------------------|--------|-------|-------|-------------|------------|
| SEQUEST:(PepMatched Observed.Hits Coverage) |        |       |       |             | 5 5 15.01% |
| INVYYNEAAGNK                                | +2     | 4.296 | 0.455 | 0.9999      | 8          |
| ALTVPELTQQMFDSK                             | +2     | 4.446 | 0.545 | 1.0000      | 6          |
| YLTVAIFR                                    | +2     | 3.078 | 0.383 | 0.9993      | 1          |
| MSATFIGNSTAIQELFK                           | +2     | 5.384 | 0.447 | 0.9609      | 2          |
| MSATFIGNSTAIQELFKRISEQFTAMFR                | +3     | 3.813 | 0.425 | 0.9937      | 3          |
| MASCOT:(PepMatched Observed.Hits Coverage)  |        |       |       |             |            |

No. 608. Protein IPI00189795 Matched (SEQUEST MASCOT) Y Y emPAI Strategy.Hits 1.57 4 19 PepMatched(SEQUEST MASCOT) 7 193 SpectraMatched(SEQUEST MASCOT) 60

\*Des: Tubulin alpha-1 chain

| Seq                                         | Charge | Xcor  | Delta | Probability | PepHits     |
|---------------------------------------------|--------|-------|-------|-------------|-------------|
| SEQUEST:(PepMatched Observed.Hits Coverage) |        |       |       |             | 19 14 58.6% |
| DVNAAIATIK                                  | +2     | 3.417 | 0.478 | 0.9998      | 9           |

Identified Human Platelet Proteins

|                                            |        |            |            |              |        |        |    |                  |
|--------------------------------------------|--------|------------|------------|--------------|--------|--------|----|------------------|
| NLDIERPTYTNLNR                             | +3     | 2.611      | 0.440      | 0.9999       | 15     |        |    |                  |
| TIGGGDDSFNTFFSETGAGK                       | +2     | 5.918      | 5.918      | 0.677        | 1.0000 | 4      |    |                  |
| AVFVDLEPTVIDEVR                            | +2     | 5.529      | 0.460      | 1.0000       | 20     |        |    |                  |
| AYHEQLSVAEITNACFEPANQMVK                   |        |            | +2         | 5.764        | 0.609  | 1.0000 | 14 |                  |
| AVCMLSNTTAIAEAWAR                          | +2     | 4.588      | 4.588      | 0.562        | 1.0000 | 7      |    |                  |
| TIQFVDWCPTGFK                              | +2     | 4.351      | 0.463      | 1.0000       | 3      |        |    |                  |
| FDGALNVDLTEFQTNLVPYPR                      | +2     | 5.703      | 5.703      | 0.622        | 1.0000 | 10     |    |                  |
| VGINYQPPTVVPGGDLAK                         | +2     | 4.644      | 4.644      | 0.480        | 1.0000 | 37     |    |                  |
| EIDLVLDR                                   | +2     | 2.604      | 0.371      | 0.9963       | 5      |        |    |                  |
| GHYTIGKEIDLVLDR                            | +3     | 5.170      | 5.170      | 0.551        | 1.0000 | 2      |    |                  |
| QLFHPEQLITGKEDAANNYAR                      | +3     | 4.798      | 4.798      | 0.547        | 1.0000 | 21     |    |                  |
| AFVHWYVGEEMEEGFSEAR                        | +3     | 4.636      | 4.636      | 0.488        | 1.0000 | 2      |    |                  |
| LDHKFDLMYAK                                | +3     | 4.587      | 0.433      | 1.0000       | 19     |        |    |                  |
| LIGQIVSSITASLR                             | +2     | 5.077      | 5.077      | 1.0000       | 26     |        |    |                  |
| RNLDIERPTYTNLNR                            | +3     | 2.959      | 0.363      | 0.9997       | 7      |        |    |                  |
| LDHKFDLMYAKR                               | +2     | 2.914      | 0.358      | 0.9820       | 2      |        |    |                  |
| IHFPLATYAPVISA EK                          | +2     | 4.664      | 4.664      | 0.691        | 1.0000 | 54     |    |                  |
| GHYTIGKEIDLVLDRIR                          | +3     | 2.475      | 2.475      | 0.403        | 0.9988 | 4      |    |                  |
| MASCOT:(PepMatched Observed.Hits Coverage) |        |            | 7          | 8            | 22.44% |        |    |                  |
| Seq                                        | Charge | ObservedMS | ExpectedMS | CalculatedMS |        |        |    | PepScore PepHits |
| DVNAAIATIK                                 | +2     | 508.30     | 1014.58    | 1014.57      | 0.01   | 45     | 6  |                  |
| NLDIERPTYTNLNR                             | +2     | 859.95     | 1717.89    | 1717.87      | 0.02   | 45     | 28 |                  |
| VGINYQPPTVVPGGDLAK                         | +2     | 913.01     | 1824.00    | 1824.00      | 0.02   | 42     | 5  |                  |
| IHFPLATYAPVISA EK                          | +2     | 878.99     | 1755.97    | 1755.96      | 0.01   | 58     | 30 |                  |
| EIDLVLDR                                   | +2     | 543.32     | 1084.62    | 1084.61      | 0.01   | 44     | 20 |                  |
| AVFVDLEPTVIDEVR                            | +2     | 851.46     | 1700.91    | 1700.90      | 0.01   | 71     | 20 |                  |
| LIGQIVSSITASLR                             | +2     | 729.44     | 1456.87    | 1456.86      | 0.01   | 60     | 4  |                  |

| No.   | Protein                                       | Matched (SEQUEST MASCOT) | emPAI | Strategy.Hits | PepMatched(SEQUEST MASCOT) | SpectraMatched(SEQUEST MASCOT) |
|-------|-----------------------------------------------|--------------------------|-------|---------------|----------------------------|--------------------------------|
| 609.  | IPI00197888                                   | Y N                      | 0.22  | 1             | 2                          | 0 6 0                          |
| *Des: | Splice Isoform 1 of Tropomyosin 1 alpha chain |                          |       |               |                            |                                |
|       | SEQUEST:(PepMatched Observed.Hits Coverage)   |                          |       | 2             | 1                          | 11.41%                         |
|       | Seq                                           | Charge                   | Xcor  | Delta         | Proability                 | PepHits                        |
|       | HIAEDADRKYEEVAR                               |                          | +2    | 3.758         | 0.509                      | 1.0000 13                      |
|       | AQKDEEKMEIQEIQLK                              |                          | +2    | 5.511         | 0.462                      | 1.0000 5                       |
|       | MASCOT:(PepMatched Observed.Hits Coverage)    |                          |       |               |                            |                                |

| No.   | Protein                                                                                 | Matched (SEQUEST MASCOT) | emPAI | Strategy.Hits | PepMatched(SEQUEST MASCOT) | SpectraMatched(SEQUEST MASCOT) |
|-------|-----------------------------------------------------------------------------------------|--------------------------|-------|---------------|----------------------------|--------------------------------|
| 610.  | IPI00188059                                                                             | Y N                      | 0.02  | 1             | 2                          | 0 5 0                          |
| *Des: | Dolichyl-diphosphooligosaccharide--protein glycosyltransferase 63 kDa subunit precursor |                          |       |               |                            |                                |
|       | SEQUEST:(PepMatched Observed.Hits Coverage)                                             |                          |       | 2             | 1                          | 6.23%                          |
|       | Seq                                                                                     | Charge                   | Xcor  | Delta         | Proability                 | PepHits                        |
|       | MPFSLVGDVFE LNFK                                                                        |                          | +2    | 5.214         | 0.556                      | 1.0000 3                       |
|       | YHVPVVVVPEGSASDTQE QAILR                                                                |                          | +3    | 5.843         | 0.428                      | 1.0000 2                       |
|       | MASCOT:(PepMatched Observed.Hits Coverage)                                              |                          |       |               |                            |                                |

| No. | Protein | Matched (SEQUEST MASCOT) | emPAI | Strategy.Hits | PepMatched(SEQUEST MASCOT) | SpectraMatched(SEQUEST MASCOT) |
|-----|---------|--------------------------|-------|---------------|----------------------------|--------------------------------|
|-----|---------|--------------------------|-------|---------------|----------------------------|--------------------------------|

**Identified Human Platelet Proteins**

|       |                                                        |                          |            |               |                            |                                |        |        |                  |
|-------|--------------------------------------------------------|--------------------------|------------|---------------|----------------------------|--------------------------------|--------|--------|------------------|
| 611.  | IPI00205745                                            | Y                        | Y          | 1.03          | 2                          | 6                              | 4      | 8      | 9                |
| *Des: | Peroxisome assembly factor 1, mitochondrial precursor  |                          |            |               |                            |                                |        |        |                  |
|       | SEQUEST:(PepMatched Observed.Hits Coverage) 6 2 34.56% |                          |            |               |                            |                                |        |        |                  |
|       | Seq                                                    | Charge                   | Xcor       | Delta         | Probability                | PepHits                        |        |        |                  |
|       | FSMVIDKGVVK                                            | +3                       |            | 2.568         | 0.558                      | 0.9972                         | 7      |        |                  |
|       | KVNLAELFKDK                                            | +3                       |            | 3.487         | 0.420                      | 0.9936                         | 1      |        |                  |
|       | VGDTIPSVEVFEGEPGKK                                     | +2                       |            | 3.221         | 0.579                      | 0.9950                         | 2      |        |                  |
|       | VGDTIPSVEVFEGEPGK                                      | +2                       |            | 3.202         | 0.688                      | 0.9979                         | 1      |        |                  |
|       | VQLLADPTGAFGKETDLLLDDSLVSLFGNRR                        |                          |            |               | +3                         | 4.056                          | 0.544  | 0.9984 | 2                |
|       | VQLLADPTGAFGKETDLLLDDSLVSLFGNR                         |                          |            |               | +3                         | 4.759                          | 0.609  | 0.9996 | 2                |
|       | MASCOT:(PepMatched Observed.Hits Coverage) 4 2 19.81%  |                          |            |               |                            |                                |        |        |                  |
|       | Seq                                                    | Charge                   | ObservedMS | ExpectedMS    | CalculatedMS               |                                |        |        | Pepscore PepHits |
|       | FSMVIDKGVVK                                            | +2                       | 611.85     | 1221.69       | 1221.68                    | 0.01                           | 49     | 8      |                  |
|       | KVNLAELFKDK                                            | +3                       | 435.59     | 1303.75       | 1303.75                    | 0                              | 43     | 1      |                  |
|       | VGDTIPSVEVFEGEPGK                                      | +2                       | 880.44     | 1758.87       | 1758.87                    | 0                              | 53     | 1      |                  |
|       | VGDTIPSVEVFEGEPGKK                                     | +3                       | 630.00     | 1886.97       | 1886.96                    | 0.01                           | 41     | 2      |                  |
|       |                                                        |                          |            |               |                            |                                |        |        |                  |
| No.   | Protein                                                | Matched (SEQUEST MASCOT) | emPAI      | Strategy.Hits | PepMatched(SEQUEST MASCOT) | SpectraMatched(SEQUEST MASCOT) |        |        |                  |
| 612.  | IPI00211080                                            | N                        | Y          | 0.14          | 1                          | 0                              | 2      | 0      | 3                |
| *Des: | Guanylate nucleotide binding protein 2                 |                          |            |               |                            |                                |        |        |                  |
|       | SEQUEST:(PepMatched Observed.Hits Coverage) 2 1 3.99%  |                          |            |               |                            |                                |        |        |                  |
|       | MASCOT:(PepMatched Observed.Hits Coverage) 2 1 3.99%   |                          |            |               |                            |                                |        |        |                  |
|       | Seq                                                    | Charge                   | ObservedMS | ExpectedMS    | CalculatedMS               |                                |        |        | Pepscore PepHits |
|       | IKAETAEEAANR                                           | +2                       | 587.3207   | 1172.6269     | 1172.6149                  | 0.01                           | 47     | 2      |                  |
|       | DFSLELEVNGK                                            | +2                       | 626.2999   | 1250.5852     | 1249.6190                  | 0.97                           | 41     | 2      |                  |
|       |                                                        |                          |            |               |                            |                                |        |        |                  |
| No.   | Protein                                                | Matched (SEQUEST MASCOT) | emPAI      | Strategy.Hits | PepMatched(SEQUEST MASCOT) | SpectraMatched(SEQUEST MASCOT) |        |        |                  |
| 613.  | IPI00200591                                            | Y                        | N          | 0.14          | 2                          | 3                              | 0      | 6      | 0                |
| *Des: | Contrapsin-like protease inhibitor 3 precursor         |                          |            |               |                            |                                |        |        |                  |
|       | SEQUEST:(PepMatched Observed.Hits Coverage) 3 4 10.23% |                          |            |               |                            |                                |        |        |                  |
|       | Seq                                                    | Charge                   | Xcor       | Delta         | Probability                | PepHits                        |        |        |                  |
|       | VFSQQADLSR                                             | +2                       |            | 2.726         | 0.281                      | 0.9876                         | 3      |        |                  |
|       | MQQVESSLQPETLKK                                        |                          |            | +3            | 3.481                      | 0.247                          | 0.9975 | 1      |                  |
|       | ITGTKDLVYSQVVHK                                        |                          |            | +3            | 3.763                      | 0.501                          | 1.0000 | 2      |                  |
|       | MASCOT:(PepMatched Observed.Hits Coverage)             |                          |            |               |                            |                                |        |        |                  |
|       |                                                        |                          |            |               |                            |                                |        |        |                  |
| No.   | Protein                                                | Matched (SEQUEST MASCOT) | emPAI      | Strategy.Hits | PepMatched(SEQUEST MASCOT) | SpectraMatched(SEQUEST MASCOT) |        |        |                  |
| 614.  | IPI00389888                                            | N                        | Y          | 0.3           | 1                          | 0                              | 3      | 0      | 7                |
| *Des: | 41 kDa protein                                         |                          |            |               |                            |                                |        |        |                  |
|       | SEQUEST:(PepMatched Observed.Hits Coverage)            |                          |            |               |                            |                                |        |        |                  |
|       | MASCOT:(PepMatched Observed.Hits Coverage) 3 1 9.04%   |                          |            |               |                            |                                |        |        |                  |
|       | Seq                                                    | Charge                   | ObservedMS | ExpectedMS    | CalculatedMS               |                                |        |        | Pepscore PepHits |
|       | EQALADLNSVER                                           | +2                       | 672.84     | 1343.67       | 1343.67                    | 0                              | 64     | 4      |                  |
|       | TAVLTLIR+2                                             |                          | 443.79     | 885.57        | 885.56                     | 0.01                           | 52     | 2      |                  |
|       | TIAQMIEDEQR                                            | +2                       | 667.32     | 1332.63       | 1332.63                    | 0                              | 42     | 3      |                  |
| No.   | Protein                                                | Matched (SEQUEST MASCOT) | emPAI      | Strategy.Hits | PepMatched(SEQUEST MASCOT) | SpectraMatched(SEQUEST MASCOT) |        |        |                  |

| Identified Human Platelet Proteins |                                                     |                          |            |               |                            |                                |        |         |     |  |
|------------------------------------|-----------------------------------------------------|--------------------------|------------|---------------|----------------------------|--------------------------------|--------|---------|-----|--|
| 615.                               | IPI00421874                                         | Y                        | Y          | 1.93          | 3                          | 8                              | 10     | 15      | 34  |  |
| *Des:                              | Voltage-dependent anion-selective channel protein 1 |                          |            |               |                            |                                |        |         |     |  |
|                                    | SEQUEST:(PepMatched Observed.Hits Coverage)         |                          |            |               | 8                          | 2                              | 47.84% |         |     |  |
|                                    | Seq                                                 | Charge                   | Xcor       | Delta         | Probability                | PepHits                        |        |         |     |  |
|                                    | SENGLEFTSSGSANTETTK                                 |                          |            | +2            | 5.676                      | 0.702                          | 1.0000 | 2       |     |  |
|                                    | VTQSNFAVGYK                                         | +2                       |            | 3.341         | 0.506                      | 0.9997                         | 4      |         |     |  |
|                                    | LTFDSSFSPNTGK                                       | +2                       |            | 3.649         | 0.506                      | 0.9997                         | 3      |         |     |  |
|                                    | KLETAVNLAWTAGNSNTR                                  | +2                       |            | 6.116         | 0.651                      | 1.0000                         | 2      |         |     |  |
|                                    | TDEFQLHTNVNDGTEFGGSIYQK                             |                          | +3         | 5.779         | 0.506                      | 1.0000                         | 3      |         |     |  |
|                                    | WTEYGLTFTEK                                         | +2                       |            | 2.867         | 0.468                      | 0.9989                         | 2      |         |     |  |
|                                    | WNTDNTLGTEITVEDQLAR                                 | +2                       |            | 5.753         | 0.503                      | 1.0000                         | 2      |         |     |  |
|                                    | GALVVG YEGWLAGYQMN FETSK                            | +2                       |            | 5.836         | 0.643                      | 1.0000                         | 2      |         |     |  |
|                                    | MASCOT:(PepMatched Observed.Hits Coverage)          |                          |            |               | 10                         | 4                              | 51.82% |         |     |  |
|                                    | Seq                                                 | Charge                   | ObservedMS | ExpectedMS    | CalculatedMS               | Pepscore                       |        | PepHits |     |  |
|                                    | VTQSNFAVGYK                                         | +2                       | 607.32     | 1212.62       | 1212.61                    | 0.01                           | 74     | 9       |     |  |
|                                    | SENGLEFTSSGSANTETTK                                 | +2                       |            | 980.45        | 1958.88                    | 1958.87                        | 0.01   | 121     | 6   |  |
|                                    | WTEYGLTFTEK                                         | +2                       | 687.84     | 1373.66       | 1373.65                    | 0.01                           | 52     | 3       |     |  |
|                                    | LTFDSSFSPNTGK                                       | +2                       | 700.84     | 1399.67       | 1399.66                    | 0.01                           | 62     | 8       |     |  |
|                                    | LETAVNLAWTAGNSNTR                                   | +2                       |            | 909.47        | 1816.92                    | 1816.91                        | 0.01   | 95      | 6   |  |
|                                    | KLETAVNLAWTAGNSNTR                                  | +2                       |            | 973.51        | 1945.01                    | 1945.00                        | 0.01   | 138     | 6   |  |
|                                    | VNSSLIGLGYTQTLKPGIK                                 | +3                       |            | 701.73        | 2102.18                    | 2102.17                        | 0.01   | 52      | 6   |  |
|                                    | TDEFQLHTNVNDGTEFGGSIYQK                             | +3                       |            | 867.40        | 2599.19                    | 2599.18                        | 0.01   | 83      | 4   |  |
|                                    | LTLSALLDGK                                          | +2                       | 515.81     | 1029.61       | 1029.61                    | 0                              | 77     | 2       |     |  |
|                                    | GALVVG YEGWLAGYQMN FETSK                            | +3                       |            | 812.07        | 2433.17                    | 2433.17                        | 0      | 46      | 2   |  |
| No.                                | Protein                                             | Matched (SEQUEST MASCOT) | emPAI      | Strategy.Hits | PepMatched(SEQUEST MASCOT) | SpectraMatched(SEQUEST MASCOT) |        |         |     |  |
| 616.                               | IPI00200593                                         | Y                        | Y          | 0.35          | 3                          | 6                              | 6      | 11      | 16  |  |
| *Des:                              | Contrapsin-like protease inhibitor 1 precursor      |                          |            |               |                            |                                |        |         |     |  |
|                                    | SEQUEST:(PepMatched Observed.Hits Coverage)         |                          |            |               | 6                          | 5                              | 17.49% |         |     |  |
|                                    | Seq                                                 | Charge                   | Xcor       | Delta         | Probability                | PepHits                        |        |         |     |  |
|                                    | IFSQQADLSR                                          | +2                       |            | 3.065         | 0.297                      | 0.9951                         | 3      |         |     |  |
|                                    | AVLDVDETGTGEGAAATAVTAALK                            | +2                       |            |               | 6.318                      | 0.601                          | 1.0000 | 3       |     |  |
|                                    | ALYQAEAFVADFK                                       | +2                       |            | 3.025         | 0.490                      | 0.9994                         | 2      |         |     |  |
|                                    | DTLP HEDQ GKGR                                      | +2                       |            | 2.834         | 0.402                      | 0.9886                         | 5      |         |     |  |
|                                    | KIFSQQADLSR                                         | +2                       |            | 3.167         | 0.349                      | 0.9976                         | 3      |         |     |  |
|                                    | NLHVSQVVHK                                          | +2                       |            | 3.327         | 0.484                      | 0.9998                         | 7      |         |     |  |
|                                    | MASCOT:(PepMatched Observed.Hits Coverage)          |                          |            |               | 6                          | 7                              | 11.82% |         |     |  |
|                                    | Seq                                                 | Charge                   | ObservedMS | ExpectedMS    | CalculatedMS               | Pepscore                       |        | PepHits |     |  |
|                                    | DTLP HEDQ GK                                        | +2                       | 570.2745   | 1138.5344     | 1138.5255                  | 0.01                           | 51     | 7       |     |  |
|                                    | IFSQQADLSR                                          | +2                       | 582.8073   | 1163.6001     | 1163.5935                  | 0.01                           | 61     | 4       |     |  |
|                                    | ALYQAEAFVADFK                                       | +2                       | 737.6658   | 1473.3170     | 1471.7347                  | 1.58                           | 56     | 2       |     |  |
|                                    | DTLP HEDQ GKGR                                      | +2                       | 676.8358   | 1351.6570     | 1351.6480                  | 0.01                           | 64     | 7       |     |  |
|                                    | KIFSQQADLSR                                         | +2                       | 646.8557   | 1291.6968     | 1291.6884                  | 0.01                           | 62     | 2       |     |  |
|                                    | NLHVSQVVHK                                          | +2                       | 580.8342   | 1159.6538     | 1159.6461                  | 0.01                           | 53     | 4       |     |  |
| No.                                | Protein                                             | Matched (SEQUEST MASCOT) | emPAI      | Strategy.Hits | PepMatched(SEQUEST MASCOT) | SpectraMatched(SEQUEST MASCOT) |        |         |     |  |
| 617.                               | IPI00454431                                         | N                        | Y          | 0.4           | 2                          | 0                              | 33     | 0       | 176 |  |

Identified Human Platelet Proteins

\*Des:

Brain-specific alpha actinin 1 isoform

SEQUEST:(PepMatched Observed.Hits Coverage)

MASCOT:(PepMatched Observed.Hits Coverage)

| Seq                        | Charge | ObservedMS | ExpectedMS | CalculatedMS | Pepscore | PepHits |
|----------------------------|--------|------------|------------|--------------|----------|---------|
| NYITGDEL                   | +2     | 540.77     | 1079.53    | 1079.52      | 0.01     | 41      |
| GISQEQMNEFR                | +2     | 669.81     | 1337.61    | 1337.60      | 0.01     | 54      |
| RDQALTEEHSR                | +3     | 447.89     | 1340.65    | 1340.64      | 0.01     | 51      |
| VPENTMQAMQK                | +2     | 702.84     | 1403.66    | 1403.65      | 0.01     | 73      |
| QKDYETATLSEIK              | +2     | 763.39     | 1524.77    | 1524.77      | 0        | 68      |
| LSNRPAFMPSEGR              | +3     | 487.92     | 1460.72    | 1460.72      | 0        | 46      |
| ASFNHFDR                   | +2     | 497.23     | 992.45     | 992.45       | 0        | 41      |
| HEAFESDLAAHQDR             | +3     | 542.58     | 1624.73    | 1624.72      | 0.01     | 46      |
| IMSIVDPNR                  | +2     | 522.78     | 1043.55    | 1043.54      | 0.01     | 49      |
| ILAGDKNYITGDEL             | +2     | 839.45     | 1676.88    | 1676.87      | 0.01     | 102     |
| LAILGIHNEVSK               | +2     | 647.38     | 1292.75    | 1292.75      | 0        | 61      |
| TINEVENQILTR               | +2     | 715.39     | 1428.76    | 1428.76      | 0        | 59      |
| ETADTDTADQVMASFK           | +2     | 865.39     | 1728.77    | 1728.75      | 0.02     | 102     |
| MLDAEDIVGTARPDEK           | +2     | 880.43     | 1758.85    | 1758.85      | 0        | 55      |
| IVQTYHVNMAGTNPYTTITPQEINGK | +3     | 964.16     | 2889.45    | 2889.43      | 0.02     | 66      |
| AGTQIENIEEFR               | +2     | 761.37     | 1520.72    | 1520.71      | 0.01     | 50      |
| FAIQDISVEETSAK             | +2     | 769.40     | 1536.78    | 1536.77      | 0.01     | 86      |
| LVSIGAEIVDGNVK             | +2     | 771.93     | 1541.84    | 1541.83      | 0.01     | 86      |
| NVNIQNFHISWK               | +2     | 750.40     | 1498.78    | 1498.77      | 0.01     | 78      |
| QFGAQANVIGPWQTK            | +2     | 879.47     | 1756.93    | 1756.93      | 0        | 45      |
| DDPLTNLNTAFDVAER           | +2     | 895.94     | 1789.86    | 1789.85      | 0.01     | 60      |
| KDDPLTNLNTAFDVAER          | +2     | 959.99     | 1917.96    | 1917.94      | 0.02     | 107     |
| AGTQIENIEEFRDGLK           | +2     | 967.98     | 1933.94    | 1933.94      | 0        | 79      |
| ISIEMHGTLEDQLSHLR          | +2     | 990.01     | 1978.01    | 1977.99      | 0.02     | 99      |
| IDQLEGDHQLIQEALIFDNK       | +3     | 780.40     | 2338.19    | 2338.18      | 0.01     | 64      |
| LLETIDQLYLEYAK             | +2     | 856.47     | 1710.93    | 1710.91      | 0.02     | 83      |
| LGVVTFQAFIDFMSR            | +2     | 865.95     | 1729.89    | 1729.89      | 0        | 98      |
| IMSIVDPNRLGVVTFQAFIDFMSR   | +3     | 919.49     | 2755.44    | 2755.42      | 0.02     | 54      |
| VEQIAAIAQELNELDYDPSVNR     | +3     | 936.80     | 2807.38    | 2807.36      | 0.02     | 79      |
| LASDLLEWIR                 | +2     | 607.37     | 1212.72    | 1214.67      | -1.94    | 76      |
| VGWEQLLTTIAR               | +2     | 693.89     | 1385.77    | 1385.77      | 0        | 77      |
| LMLLLEVISGER               | +2     | 686.90     | 1371.78    | 1371.78      | 0        | 69      |
| MTLGMWITIILR               | +2     | 724.41     | 1446.81    | 1446.81      | 0        | 88      |

No.

Protein Matched (SEQUEST MASCOT) emPAI Strategy.Hits PepMatched(SEQUEST MASCOT) SpectraMatched(SEQUEST MASCOT)

618.

IPI00421879 Y Y 1.16 2 5 6 15 16

\*Des:

Similar to programmed cell death 10

SEQUEST:(PepMatched Observed.Hits Coverage)

| Seq                      | Charge | Xcor  | Delta | Probability | PepHits |
|--------------------------|--------|-------|-------|-------------|---------|
| VNLSAAQTLR               | +2     | 3.479 | 0.440 | 0.9999      | 4       |
| AINVFISANR               | +2     | 3.665 | 0.389 | 0.9999      | 4       |
| MAADDVEEYMIERPEPEFQDLNEK | +3     | 5.704 | 0.537 | 1.0000      | 1       |
| LIHQTNLILQTFK            | +2     | 3.534 | 0.314 | 0.9984      | 4       |





Identified Human Platelet Proteins

|               |    |          |           |           |      |    |   |
|---------------|----|----------|-----------|-----------|------|----|---|
| DVQELYAAGENR  | +2 | 682.8368 | 1363.6590 | 1363.6367 | 0.02 | 72 | 4 |
| DESTNVDMSLVQR | +2 | 747.3623 | 1492.7101 | 1492.6827 | 0.03 | 76 | 2 |

No. 622. Protein IPI00382191 Matched (SEQUEST MASCOT) Y Y emPAI 0.13 Strategy.Hits 1 PepMatched(SEQUEST MASCOT) 4 SpectraMatched(SEQUEST MASCOT) 3  
 \*Des: Cc2-27

|                                             |        |            |            |              |         |          |         |
|---------------------------------------------|--------|------------|------------|--------------|---------|----------|---------|
| SEQUEST:(PepMatched Observed.Hits Coverage) |        | 4          | 1          | 6.4%         |         |          |         |
| Seq                                         | Charge | Xcor       | Delta      | Proability   | PepHits |          |         |
| GILFVSGVSGGEEGAR                            |        | +2         | 2.884      | 0.457        | 0.9990  | 1        |         |
| LVPLLDTGDIIDGGNSEYR                         |        | +2         | 5.527      | 0.552        | 1.0000  | 1        |         |
| NPELQNLDDFFK                                | +2     | 4.952      | 0.503      | 1.0000       | 3       |          |         |
| TELDNFLIEITANILK                            | +3     | 3.223      | 0.248      | 0.9889       | 1       |          |         |
| MASCOT:(PepMatched Observed.Hits Coverage)  |        | 3          | 1          | 4.51%        |         |          |         |
| Seq                                         | Charge | ObservedMS | ExpectedMS | CalculatedMS |         | Pepscore | PepHits |
| GILFVSGVSGGEEGAR                            |        | +2         | 796.41     | 1590.80      | 1590.80 | 0        | 60      |
| NPELQNLDDFFK                                | +2     | 853.45     | 1704.89    | 1704.87      | 0.02    | 76       | 9       |
| TELDNFLIEITANILK                            | +3     | 607.34     | 1819.00    | 1819.00      | 0       | 46       | 3       |

No. 623. Protein IPI00208224 Matched (SEQUEST MASCOT) Y Y emPAI 0.11 Strategy.Hits 1 PepMatched(SEQUEST MASCOT) 3 SpectraMatched(SEQUEST MASCOT) 2  
 \*Des: Signal transducer and activator of transcription 3

|                                             |        |            |            |              |         |          |         |
|---------------------------------------------|--------|------------|------------|--------------|---------|----------|---------|
| SEQUEST:(PepMatched Observed.Hits Coverage) |        | 3          | 1          | 7.64%        |         |          |         |
| Seq                                         | Charge | Xcor       | Delta      | Proability   | PepHits |          |         |
| GLSIEQLTTLAEK                               |        | +2         | 2.730      | 0.382        | 0.9963  | 2        |         |
| LLQTAATAAQGGQANHPAAVVTEK                    |        | +3         | 4.181      | 0.543        | 1.0000  | 1        |         |
| SIVSELAGLLSAMEYVQK                          |        | +3         | 4.413      | 0.512        | 1.0000  | 3        |         |
| MASCOT:(PepMatched Observed.Hits Coverage)  |        | 2          | 1          | 5.85%        |         |          |         |
| Seq                                         | Charge | ObservedMS | ExpectedMS | CalculatedMS |         | Pepscore | PepHits |
| LLQTAATAAQGGQANHPAAVVTEK                    |        | +3         | 859.46     | 2575.35      | 2575.34 | 0.01     | 88      |
| SIVSELAGLLSAMEYVQK                          |        | +3         | 646.68     | 1937.02      | 1937.02 | 0        | 66      |

No. 624. Protein IPI00358063 Matched (SEQUEST MASCOT) Y Y emPAI 0.51 Strategy.Hits 1 PepMatched(SEQUEST MASCOT) 3 SpectraMatched(SEQUEST MASCOT) 2  
 \*Des: PREDICTED: similar to chromosome 2 open reading frame 33

|                                             |        |            |            |              |         |          |         |
|---------------------------------------------|--------|------------|------------|--------------|---------|----------|---------|
| SEQUEST:(PepMatched Observed.Hits Coverage) |        | 3          | 1          | 14.08%       |         |          |         |
| Seq                                         | Charge | Xcor       | Delta      | Proability   | PepHits |          |         |
| IVVTGNNEDISFSR                              |        | +2         | 3.597      | 0.470        | 0.9996  | 1        |         |
| IQYEMEYTEGISQR                              |        | +2         | 3.419      | 0.561        | 1.0000  | 1        |         |
| PADLDLIQSTPFKPLALK                          |        | +3         | 3.131      | 0.342        | 0.9878  | 3        |         |
| MASCOT:(PepMatched Observed.Hits Coverage)  |        | 2          | 1          | 7.75%        |         |          |         |
| Seq                                         | Charge | ObservedMS | ExpectedMS | CalculatedMS |         | Pepscore | PepHits |
| LQLLEENKER                                  |        | +2         | 700.88     | 1399.74      | 1399.73 | 0.01     | 57      |
| IQYEMEYTEGISQR                              |        | +2         | 873.91     | 1745.81      | 1745.79 | 0.02     | 85      |

No. 625. Protein IPI00358138 Matched (SEQUEST MASCOT) Y Y emPAI 0.32 Strategy.Hits 1 PepMatched(SEQUEST MASCOT) 3 SpectraMatched(SEQUEST MASCOT) 4  
 \*Des: PREDICTED: similar to AP47 protein - mouse

Identified Human Platelet Proteins

| SEQUEST:(PepMatched Observed.Hits Coverage) |        | 3          | 1          | 9.07%        |         |      |          |         |  |  |  |
|---------------------------------------------|--------|------------|------------|--------------|---------|------|----------|---------|--|--|--|
| Seq                                         | Charge | Xcor       | Delta      | Proability   | PepHits |      |          |         |  |  |  |
| ILQEYITQEGHK                                | +2     |            | 3.769      | 0.438        | 0.9998  | 2    |          |         |  |  |  |
| SGYQALPWVR                                  | +2     |            | 2.745      | 0.306        | 0.9930  | 2    |          |         |  |  |  |
| KNEVFLDVIEAVNLLVSANGNVLR                    | +3     |            | 5.001      | 0.445        | 0.9999  | 2    |          |         |  |  |  |
| MASCOT:(PepMatched Observed.Hits Coverage)  |        | 4          | 1          | 9.07%        |         |      |          |         |  |  |  |
| Seq                                         | Charge | ObservedMS | ExpectedMS | CalculatedMS |         |      | Pepscore | PepHits |  |  |  |
| ILQEYITQEGHK                                | +2     | 729.88     | 1457.75    | 1457.75      | 0       | 50   | 2        |         |  |  |  |
| SGYQALPWVR                                  | +2     | 588.81     | 1175.60    | 1175.61      | 0       | 45   | 4        |         |  |  |  |
| NEVFLDVIEAVNLLVSANGNVLR                     | +3     |            | 833.46     | 2497.36      | 2497.35 | 0.01 | 47       | 2       |  |  |  |
| KNEVFLDVIEAVNLLVSANGNVLR                    | +3     |            | 876.16     | 2625.45      | 2625.45 | 0    | 47       | 4       |  |  |  |

No. 626. IPI00365283 Protein Matched (SEQUEST MASCOT) emPAI Strategy.Hits PepMatched(SEQUEST MASCOT) SpectraMatched(SEQUEST MASCOT)  
 \*Des: F-actin capping protein beta subunit

| SEQUEST:(PepMatched Observed.Hits Coverage) |        | 7          | 2          | 28.51%       |      |     |          |         |  |  |
|---------------------------------------------|--------|------------|------------|--------------|------|-----|----------|---------|--|--|
| Seq                                         | Charge | ObservedMS | ExpectedMS | CalculatedMS |      |     | Pepscore | PepHits |  |  |
| SGSGTMNLGGSLTR                              | +2     | 669.33     | 1336.65    | 1336.64      | 0.01 | 105 | 2        |         |  |  |
| YDPPLDYGAMPSAR                              | +2     | 759.85     | 1517.69    | 1517.68      | 0.01 | 57  | 4        |         |  |  |
| NDLVEALK                                    | +2     | 451.25     | 900.49     | 900.49       | 0    | 42  | 2        |         |  |  |
| LEVEANNAFDQYR                               | +2     | 784.88     | 1567.74    | 1567.73      | 0.01 | 69  | 3        |         |  |  |
| KLEVEANNAFDQYR                              | +2     | 848.93     | 1695.84    | 1695.82      | 0.02 | 109 | 5        |         |  |  |
| STLNEYIFGK                                  | +2     | 586.31     | 1170.60    | 1170.59      | 0.01 | 60  | 5        |         |  |  |
| LTSTVMLWLQTNK                               | +2     | 767.93     | 1533.85    | 1533.82      | 0.03 | 62  | 18       |         |  |  |

No. 627. IPI00198695 Protein Matched (SEQUEST MASCOT) emPAI Strategy.Hits PepMatched(SEQUEST MASCOT) SpectraMatched(SEQUEST MASCOT)  
 \*Des: Integrin beta3 subunit

| SEQUEST:(PepMatched Observed.Hits Coverage) |        | 12         | 14         | 20.72%       |         |      |          |         |  |  |  |
|---------------------------------------------|--------|------------|------------|--------------|---------|------|----------|---------|--|--|--|
| Seq                                         | Charge | Xcor       | Delta      | Proability   | PepHits |      |          |         |  |  |  |
| HVLTLTDQVTR                                 | +2     |            | 3.103      | 0.504        | 0.9998  | 13   |          |         |  |  |  |
| AKWDTANNPLYK                                | +3     |            | 3.756      | 0.362        | 0.9965  | 2    |          |         |  |  |  |
| EATSTFTNITYR                                | +2     |            | 3.588      | 0.412        | 0.9996  | 5    |          |         |  |  |  |
| DDLSSIQTGLTK                                | +2     |            | 4.397      | 0.432        | 0.9999  | 7    |          |         |  |  |  |
| LAGIVLPNDGR                                 | +2     |            | 2.945      | 0.385        | 0.9984  | 7    |          |         |  |  |  |
| IGDTVSFSIEAK                                | +2     |            | 3.976      | 0.458        | 0.9999  | 9    |          |         |  |  |  |
| EQSFTIKPVGFK                                | +2     |            | 2.743      | 0.475        | 0.9993  | 5    |          |         |  |  |  |
| NDASHLLVFTTDAK                              | +2     |            | 4.767      | 0.542        | 1.0000  | 6    |          |         |  |  |  |
| GSGDSAQITQVSPQR                             | +2     |            | 4.245      | 0.382        | 0.9996  | 5    |          |         |  |  |  |
| PVSPYMFISPPQAIK                             | +2     |            | 4.069      | 0.570        | 1.0000  | 3    |          |         |  |  |  |
| IGFGAFVDKPVSPYMFISPPQAIK                    | +3     |            | 5.471      | 0.502        | 1.0000  | 3    |          |         |  |  |  |
| QVEDYVPDIYYLMDLSFSMK                        | +3     |            | 4.447      | 0.547        | 1.0000  | 3    |          |         |  |  |  |
| MASCOT:(PepMatched Observed.Hits Coverage)  |        | 11         | 15         | 20.09%       |         |      |          |         |  |  |  |
| Seq                                         | Charge | ObservedMS | ExpectedMS | CalculatedMS |         |      | Pepscore | PepHits |  |  |  |
| HVLTLTDQVTR                                 | +2     | 641.86     | 1281.70    | 1281.70      | 0       | 53   | 13       |         |  |  |  |
| GSGDSAQITQVSPQR                             | +2     |            | 765.88     | 1529.75      | 1529.74 | 0.01 | 92       | 4       |  |  |  |

Identified Human Platelet Proteins

|                          |    |        |         |         |         |      |    |   |
|--------------------------|----|--------|---------|---------|---------|------|----|---|
| DDLSSIQTLGTK             | +2 | 639.34 | 1276.66 | 1276.65 | 0.01    | 92   | 7  |   |
| EATSTFTNITYR             | +2 | 702.35 | 1402.68 | 1402.67 | 0.01    | 63   | 5  |   |
| IFSLQVR                  | +2 | 431.76 | 861.51  | 861.51  | 0       | 42   | 2  |   |
| LAGIVLPNDGR              | +2 | 562.83 | 1123.64 | 1123.63 | 0.01    | 45   | 8  |   |
| IGDTSVFSIEAK             | +2 | 633.83 | 1265.66 | 1265.65 | 0.01    | 84   | 11 |   |
| EQSFTIKPVGFK             | +2 | 690.88 | 1379.75 | 1379.74 | 0.01    | 51   | 6  |   |
| NDASHLLVFTTDAK           | +2 | 766.39 | 1530.77 | 1530.77 | 0       | 95   | 4  |   |
| QVEDYPVDIYYLMDLSFSMK     | +3 |        | 819.39  | 2455.15 | 2455.13 | 0.02 | 50 | 2 |
| IGFGAFVDKPVSPYMFISPPQAIK | +3 |        | 870.47  | 2608.39 | 2608.38 | 0.01 | 49 | 2 |

No. 628. Protein IPI00206624 Matched (SEQUEST MASCOT) Y Y emPAI 1.29 Strategy.Hits 4 PepMatched(SEQUEST MASCOT) 19 20 36 SpectraMatched(SEQUEST MASCOT) 67

\*Des:

78 kDa glucose-regulated protein precursor

SEQUEST:(PepMatched Observed.Hits Coverage) 19 7 34.88%

| Seq                  | Charge | Xcor | Delta | Proability | PepHits |
|----------------------|--------|------|-------|------------|---------|
| TWNDPSVQQDIK         | +2     |      | 3.253 | 0.370      | 4       |
| SQIFSTASDNQPTVTIK    | +2     |      | 5.061 | 0.597      | 3       |
| DAGTIAGLNVMR         | +2     |      | 3.382 | 0.462      | 5       |
| ELEEIVQPIISK         | +2     |      | 3.312 | 0.395      | 1       |
| ITITNDQNR            | +2     |      | 2.976 | 0.309      | 5       |
| LYGSGGPPPTGEEDTSEKDE | +2     |      | 5.350 | 0.644      | 1       |
| NQLTSNPENTVFDK       | +2     |      | 4.362 | 0.562      | 1       |
| NGRVEIANDQGMR        | +2     |      | 3.022 | 0.395      | 1       |
| AKFEELNMDLFR         | +3     |      | 3.262 | 0.442      | 3       |
| IEIESFFEGEDFSETLTR   | +2     |      | 2.730 | 0.450      | 1       |
| ALSSQHQAR            | +2     |      | 3.210 | 0.399      | 7       |
| MKETAEAYLGKK         | +3     |      | 3.226 | 0.309      | 2       |
| TKPYIQVDIGGGQTK      | +2     |      | 3.995 | 0.468      | 8       |
| KKELEEIVQPIISK       | +2     |      | 4.754 | 0.527      | 5       |
| VTHAVVTVPAYFNDAQR    | +2     |      | 4.681 | 0.435      | 3       |
| DNHLLGTFDLTGIPPAPR   | +2     |      | 4.689 | 0.589      | 3       |
| RALSSQHQAR           | +2     |      | 2.845 | 0.358      | 3       |
| KTKPYIQVDIGGGQTK     | +2     |      | 4.257 | 0.516      | 3       |
| KVTHAVVTVPAYFNDAQR   | +3     |      | 3.293 | 0.273      | 1       |

MASCOT:(PepMatched Observed.Hits Coverage) 20 7 41.8%

| Seq                   | Charge | ObservedMS | ExpectedMS | CalculatedMS | Pepscore | PepHits |    |
|-----------------------|--------|------------|------------|--------------|----------|---------|----|
| MKETAEAYLGK           | +2     | 620.81     | 1239.61    | 1239.62      | 0        | 4       |    |
| TWNDPSVQQDIK          | +2     | 715.85     | 1429.68    | 1429.68      | 0        | 3       |    |
| TKPYIQVDIGGGQTK       | +2     |            | 802.94     | 1603.86      | 1603.86  | 0       | 62 |
| LYGSGGPPPTGEEDTSEKDEL | +3     |            | 726.66     | 2176.97      | 2176.96  | 0.01    | 59 |
| VEIANDQGMR            | +2     | 614.82     | 1227.62    | 1227.62      | 0        | 43      | 16 |
| DAGTIAGLNVMR          | +2     | 609.32     | 1216.62    | 1216.62      | 0        | 71      | 8  |
| ITPSYVAFTPEGER        | +2     | 783.89     | 1565.77    | 1565.77      | 0        | 64      | 4  |
| KSDIDEIVLVGGSTR       | +2     | 794.93     | 1587.84    | 1587.85      | 0        | 71      | 3  |
| NQLTSNPENTVFDK        | +2     | 839.41     | 1676.81    | 1676.80      | 0.01     | 66      | 5  |
| SQIFSTASDNQPTVTIK     | +2     | 918.97     | 1835.94    | 1835.93      | 0.01     | 92      | 7  |
| VTHAVVTVPAYFNDAQR     | +3     | 629.99     | 1886.96    | 1886.96      | 0        | 47      | 6  |

Identified Human Platelet Proteins

|                    |    |        |         |         |      |     |    |  |
|--------------------|----|--------|---------|---------|------|-----|----|--|
| NELESYAYSLK        | +2 | 658.82 | 1315.63 | 1315.63 | 0    | 62  | 4  |  |
| ELEEIVQPIISK       | +2 | 699.40 | 1396.79 | 1396.78 | 0.01 | 52  | 3  |  |
| IINEPTAAAIAYGLDKR  | +2 | 908.50 | 1814.99 | 1814.99 | 0    | 71  | 6  |  |
| IEWLESHQDADIEDFK   | +2 | 987.96 | 1973.91 | 1973.90 | 0.01 | 113 | 5  |  |
| IINEPTAAAIAYGLDK+2 |    | 830.45 | 1658.89 | 1658.89 | 0    | 95  | 20 |  |
| FEELNMDLFR         | +2 | 658.29 | 1314.56 | 1312.61 | 1.95 | 47  | 4  |  |
| AKFEELNMDLFR       | +2 | 756.88 | 1511.74 | 1511.74 | 0    | 88  | 5  |  |
| TFAPEEISAMVLTK     | +2 | 768.91 | 1535.80 | 1535.79 | 0.01 | 70  | 6  |  |
| DNHLLGTFDLTGIPPAPR | +2 | 967.51 | 1933.01 | 1933.01 | 0    | 86  | 11 |  |

No. 629. Protein IPI00362014 Matched (SEQUEST MASCOT) Y Y emPAI Strategy.Hits 1.76 5 PepMatched(SEQUEST MASCOT) 115 107 SpectraMatched(SEQUEST MASCOT) 768 896

\*Des: PREDICTED: similar to talin

| Seq                       | Charge | Xcor  | Delta | Probability | PepHits |  |  |
|---------------------------|--------|-------|-------|-------------|---------|--|--|
| CTQDLGNSTK                | +2     | 2.806 | 0.177 | 0.9553      | 2       |  |  |
| VLVQNAAGSQEK              | +2     | 3.330 | 0.529 | 1.0000      | 17      |  |  |
| NGDTMEYR                  | +2     | 2.891 | 0.287 | 0.9937      | 5       |  |  |
| EVANSTANLVK               | +2     | 3.089 | 0.464 | 0.9995      | 12      |  |  |
| STVLQQQYNR                | +2     | 3.433 | 0.358 | 0.9990      | 8       |  |  |
| ALSTDPAAPNLK              | +2     | 3.462 | 0.388 | 0.9990      | 19      |  |  |
| ALDGAFTEENR               | +2     | 3.636 | 0.521 | 1.0000      | 4       |  |  |
| AAAFEDQENETVVVK           | +2     | 4.992 | 0.490 | 1.0000      | 4       |  |  |
| QEDVIATANLSR              | +2     | 3.931 | 0.476 | 1.0000      | 5       |  |  |
| VLGEAMTGISQNAK            | +2     | 5.051 | 0.582 | 1.0000      | 21      |  |  |
| DDILNGSHPVSFDK            | +2     | 4.155 | 0.500 | 1.0000      | 10      |  |  |
| IGITNHDEYSLVR             | +3     | 4.594 | 0.493 | 1.0000      | 8       |  |  |
| AAMEPIVISAK               | +2     | 3.029 | 0.390 | 0.9983      | 6       |  |  |
| LLSDSLPPSTGTFQEAQSR       | +2     | 4.851 | 0.629 | 1.0000      | 13      |  |  |
| ALGDLISATK                | +2     | 3.987 | 0.536 | 1.0000      | 5       |  |  |
| ASVPTIQDQASAMQLSQCAK      | +2     | 6.431 | 0.665 | 1.0000      | 12      |  |  |
| LLGEIAQGNENYAGIAAR        | +2     | 4.732 | 0.652 | 1.0000      | 3       |  |  |
| MVAAATNNLCEAANAAVQGHASQEK | +3     | 4.661 | 0.455 | 1.0000      | 8       |  |  |
| AIAVTVQEMVTK              | +2     | 4.604 | 0.614 | 1.0000      | 15      |  |  |
| SKDHFGLGDEESTMLEDSVSPK    | +3     | 5.858 | 0.525 | 1.0000      | 5       |  |  |
| VVAPTISSPVCQEQLVEAGR      | +2     | 5.256 | 0.545 | 1.0000      | 2       |  |  |
| TMLESAGGLIQTAR            | +2     | 4.608 | 0.437 | 1.0000      | 10      |  |  |
| VGDDPAVWQLK               | +2     | 3.519 | 0.474 | 0.9998      | 3       |  |  |
| NGNLPEFGDAIATASK          | +2     | 4.518 | 0.524 | 1.0000      | 10      |  |  |
| NLGTALAE LR               | +2     | 3.215 | 0.456 | 0.9996      | 12      |  |  |
| DLDQASLAAVSQQLAPR         | +2     | 4.690 | 0.436 | 1.0000      | 10      |  |  |
| SNTSPEELGPLANQLTSDYGR     | +2     | 4.873 | 0.635 | 1.0000      | 5       |  |  |
| ILAQATSDLVNAIK            | +2     | 4.719 | 0.586 | 1.0000      | 4       |  |  |
| LGAASLGAEDPETQVVLINAVK    | +2     | 5.672 | 0.567 | 1.0000      | 4       |  |  |
| AVAEQIPLLQGVV             | +3     | 5.403 | 0.458 | 1.0000      | 34      |  |  |
| LNEAAAGLNQAATELVQASR      | +2     | 6.564 | 0.545 | 1.0000      | 20      |  |  |
| TMQFEPSTMVYDACR           | +2     | 4.378 | 0.469 | 1.0000      | 4       |  |  |

Identified Human Platelet Proteins

|                                    |    |       |       |        |        |    |  |
|------------------------------------|----|-------|-------|--------|--------|----|--|
| VGAIPANALDDGQWSQGLISAAR            | +2 |       | 6.011 | 0.684  | 1.0000 | 14 |  |
| GLAGAVSELLR                        | +2 | 3.867 | 0.377 | 0.9995 | 20     |    |  |
| EADESLNFEEQILEAAK                  | +2 |       | 6.094 | 0.547  | 1.0000 | 11 |  |
| ILAQATSDLVNAIKADAEGESDLENSRK       | +3 |       | 5.019 | 0.495  | 1.0000 | 8  |  |
| ILAQATSDLVNAIKADAEGESDLENSR        | +3 |       | 6.852 | 0.591  | 1.0000 | 7  |  |
| VAGSVTELIQAAEAMK                   | +2 | 5.396 | 0.553 | 1.0000 | 7      |    |  |
| GSQAQPDSPSAQLALIAASQSFLQPGGK       | +2 |       | 6.610 | 0.652  | 1.0000 | 14 |  |
| TVTDMLMTICAR                       | +2 | 3.733 | 0.569 | 1.0000 | 11     |    |  |
| AVTDSINQLITMCTQQAPGQK              | +2 | 5.844 | 0.563 | 1.0000 | 20     |    |  |
| VSQMAQYFEPLTLAAVGAASK              | +3 | 6.567 | 0.585 | 1.0000 | 24     |    |  |
| DKAPGQLECETAIAALNSCLR              | +2 | 5.116 | 0.607 | 1.0000 | 7      |    |  |
| MVGGIAQIIAAQEEMLR                  | +3 | 6.647 | 0.572 | 1.0000 | 16     |    |  |
| TEDSGLQTQVIAAATQCALSTSQVLVACTK     | +3 |       | 4.433 | 0.487  | 1.0000 | 1  |  |
| AATAPLLEAVDNLASFASNPEFSSVPAQISPEGR | +3 |       | 6.020 | 0.601  | 1.0000 | 14 |  |
| GTEWVDPEDPTVIAENELLGAAAIEAAK       | +3 |       | 7.279 | 0.628  | 1.0000 | 14 |  |
| YDQATDTILVTENIFSSMGDAGEMVR         | +3 |       | 6.530 | 0.657  | 1.0000 | 3  |  |
| AEASQLGHK                          | +2 | 2.824 | 0.313 | 0.9949 | 10     |    |  |
| AVEDEATKGTR                        | +2 | 3.450 | 0.442 | 0.9982 | 14     |    |  |
| MATNAAAQNAIK                       | +2 | 4.398 | 0.469 | 1.0000 | 10     |    |  |
| AAAFEDQENETVVVKEK                  | +2 | 5.170 | 0.461 | 1.0000 | 13     |    |  |
| SIAAATSALVK                        | +2 | 3.673 | 0.570 | 1.0000 | 8      |    |  |
| FGQDFSTFLEAGVEMAGQAPSQEDR          | +2 |       | 6.303 | 0.661  | 1.0000 | 8  |  |
| AVTDSINQLITMCTQQAPGQKCDNALR        | +3 |       | 3.515 | 0.336  | 0.9986 | 1  |  |
| FGQDFSTFLEAGVEMAGQAPSQEDRAQVVSNLK  | +3 |       | 5.531 | 0.579  | 1.0000 | 1  |  |
| TIMVDDSKTVTDMLMTICAR               | +3 | 4.190 | 0.479 | 0.9999 | 2      |    |  |
| EGISQEALHTQMLTAVQEISHLIEPLASAAR    | +3 |       | 6.905 | 0.712  | 1.0000 | 23 |  |
| GAAAHDPDSEEQQR                     | +3 | 4.100 | 0.296 | 0.9998 | 4      |    |  |
| VKADQDSEAMKR                       | +2 | 3.785 | 0.511 | 1.0000 | 13     |    |  |
| TVSDSIK                            | +2 | 2.817 | 0.260 | 0.9891 | 12     |    |  |
| RASDNLVK                           | +2 | 2.611 | 0.175 | 0.9554 | 4      |    |  |
| RQFVQSAK                           | +2 | 2.626 | 0.236 | 0.9760 | 11     |    |  |
| MVEAAKGAAHPDSEEQQR                 | +3 | 4.962 | 0.381 | 1.0000 | 4      |    |  |
| MATNAAAQNAIKK                      | +2 | 4.245 | 0.446 | 1.0000 | 11     |    |  |
| KSTVLQQQYNR                        | +2 | 3.676 | 0.499 | 1.0000 | 7      |    |  |
| ALEATTEHIR                         | +2 | 3.068 | 0.310 | 0.9960 | 1      |    |  |
| ELMEEKKDEGTGTLR                    | +2 | 4.825 | 0.423 | 1.0000 | 3      |    |  |
| LAQAAQSSVATITR                     | +2 | 4.895 | 0.543 | 1.0000 | 14     |    |  |
| EAAFHPEVAPDVR                      | +2 | 3.108 | 0.428 | 0.9988 | 6      |    |  |
| AVAAGNSCRQEDVIATANLSR              | +3 | 4.357 | 0.426 | 1.0000 | 1      |    |  |
| TLREQGVEEHETLLLR                   | +3 | 4.968 | 0.449 | 1.0000 | 6      |    |  |
| VLVEDTKVLVQNAAGSQEK                | +3 | 3.648 | 0.492 | 1.0000 | 2      |    |  |
| QKLHTDDELNWLHDHGR                  | +3 | 3.424 | 0.301 | 0.9982 | 4      |    |  |
| SKDHFGLEGDEESTMLEDSVSPKK           | +3 |       | 7.205 | 0.461  | 1.0000 | 4  |  |
| AVASAAAALVLK                       | +2 | 3.980 | 0.465 | 1.0000 | 11     |    |  |
| VMVTNVTSLLK                        | +2 | 4.175 | 0.463 | 1.0000 | 44     |    |  |
| AKPKAEDESLNFEEQILEAAK              | +3 | 3.735 | 0.524 | 1.0000 | 2      |    |  |
| LLAALLEDEGGNGRPLLQAAK              | +3 | 5.443 | 0.591 | 1.0000 | 14     |    |  |

Identified Human Platelet Proteins

|                                            |        |            |            |              |      |                  |
|--------------------------------------------|--------|------------|------------|--------------|------|------------------|
| LGAASLGAEDPETQVVLINAVKDVAK                 | +3     | 3.588      | 0.481      | 1.0000       | 7    |                  |
| LQAAGNAVKR                                 | +2     | 3.127      | 0.271      | 0.9918       | 29   |                  |
| AGALQCSPSDVYTKK                            | +3     | 3.372      | 0.413      | 1.0000       | 3    |                  |
| VQELGHGCSALVTK                             | +2     | 4.543      | 0.472      | 1.0000       | 10   |                  |
| LASQAKPAVAEAENEI GAHIK                     | +3     | 6.508      | 0.488      | 1.0000       | 20   |                  |
| QAAASATQTIAAAQHAASAPK                      | +2     | 5.631      | 0.542      | 1.0000       | 31   |                  |
| WSVLAGHSR                                  | +2     | 3.156      | 0.400      | 0.9993       | 3    |                  |
| TLREQGVVEEHETLLRR                          | +3     | 3.400      | 0.450      | 1.0000       | 3    |                  |
| AQVVSNLKGISMSSSK                           | +2     | 3.551      | 0.479      | 0.9982       | 1    |                  |
| RAIADMLR                                   | +2     | 3.329      | 0.264      | 0.9974       | 9    |                  |
| QVAASTAQLLVACK                             | +2     | 4.286      | 0.623      | 1.0000       | 3    |                  |
| ACEFAGFQCQIQFGPHNEQK                       | +3     | 3.805      | 0.320      | 0.9930       | 6    |                  |
| RVAGSVTELIQAAEAMK                          | +2     | 4.907      | 0.565      | 1.0000       | 6    |                  |
| ASAGPQPLLVQSCK                             | +2     | 3.841      | 0.526      | 1.0000       | 19   |                  |
| RLLSDSLPPSTGTFQEAQSR                       | +3     | 5.644      | 0.562      | 1.0000       | 2    |                  |
| AGALQCSPSDVYTKKELIECAR                     | +3     | 4.226      | 0.381      | 0.9999       | 2    |                  |
| AGFLDLKDFLPK                               | +2     | 4.159      | 0.254      | 0.9895       | 32   |                  |
| VSHVLAALQAGNR                              | +2     | 4.712      | 0.598      | 1.0000       | 14   |                  |
| TLSHPPQMALLDQTK                            | +3     | 5.126      | 0.373      | 1.0000       | 36   |                  |
| AEHGSVALPAIMR                              | +2     | 3.975      | 0.466      | 1.0000       | 12   |                  |
| VLVQNAAGSQEKLAQAAQSSVATITR                 | +3     | 6.318      | 0.538      | 1.0000       | 9    |                  |
| ANQAIQMACQSLGEPGCTQAQVLSAATIVAK            | +3     | 7.342      | 0.634      | 1.0000       | 7    |                  |
| MVGIIAQIIAAQEMLRK                          | +2     | 5.841      | 0.525      | 1.0000       | 58   |                  |
| GVGAAATAVTQALNELLQHVK                      | +2     | 6.516      | 0.638      | 1.0000       | 53   |                  |
| AHATGAGPAGR                                | +2     | 2.687      | 0.557      | 0.9997       | 21   |                  |
| RLQAAGNAVKR                                | +2     | 2.860      | 0.235      | 0.9602       | 6    |                  |
| MATNAAAQNAIKKK                             | +2     | 3.821      | 0.428      | 0.9979       | 4    |                  |
| VSEKVSHVLAALQAGNR                          | +3     | 5.021      | 0.415      | 1.0000       | 5    |                  |
| LAQVAKAVTQALNR                             | +2     | 3.632      | 0.474      | 0.9985       | 3    |                  |
| MVAAATNNLCEAANAAVQGHASQEKLISAK             | +3     | 5.592      | 0.506      | 1.0000       | 4    |                  |
| EKMVGIIAQIIAAQEMLRK                        | +3     | 3.127      | 0.436      | 0.9999       | 2    |                  |
| KLVQRLEHAAK                                | +2     | 3.130      | 0.364      | 0.9907       | 4    |                  |
| SGASGPENFQVGSMPPAQQVTSQGMHR                | +3     | 6.101      | 0.627      | 1.0000       | 24   |                  |
| ALSTDPAAPNLKSQLAAAAR                       | +2     | 5.029      | 0.601      | 1.0000       | 8    |                  |
| PAVAEAENEI GAHIKHR                         | +3     | 3.136      | 0.520      | 0.9998       | 1    |                  |
| RVSEKVSHVLAALQAGNR                         | +3     | 4.007      | 0.605      | 1.0000       | 1    |                  |
| MASCOT:(PepMatched Observed.Hits Coverage) | 107    | 35         | 49.45%     |              |      |                  |
| Seq                                        | Charge | ObservedMS | ExpectedMS | CalculatedMS |      | Pepscore PepHits |
| SAQPASAEPR                                 | +2     | 507.2565   | 1012.4985  | 1012.4937    | 0    | 2                |
| CTQDLGNSTK                                 | +2     | 533.7481   | 1065.4817  | 1065.4761    | 0.01 | 2                |
| TVTDMMLTICAR                               | +2     | 677.8356   | 1353.6567  | 1353.6454    | 0.01 | 9                |
| AGFLDLKDFLPK                               | +2     | 682.3881   | 1362.7617  | 1362.7547    | 0.01 | 36               |
| VAGSVTELIQAAEAMK                           | +2     | 809.4357   | 1616.8569  | 1616.8443    | 0.01 | 119              |
| MVGIIAQIIAAQEMLR                           | +2     | 915.4908   | 1828.9671  | 1828.9538    | 0.01 | 115              |
| TVSDSIKK                                   | +2     | 439.2557   | 876.4969   | 876.4916     | 0.01 | 13               |
| AEASQLGHK                                  | +2     | 470.7493   | 939.4840   | 939.4774     | 0.01 | 15               |
| AVEDEATKGTR                                | +2     | 588.8005   | 1175.5864  | 1175.5782    | 0.01 | 93               |

Identified Human Platelet Proteins

|                    |    |          |           |           |       |     |    |  |
|--------------------|----|----------|-----------|-----------|-------|-----|----|--|
| QFVQSAK            | +2 | 403.6350 | 805.2555  | 806.4286  | -1.16 | 41  | 10 |  |
| GTPQDLAR           | +2 | 429.2296 | 856.4447  | 856.4403  | 0     | 43  | 12 |  |
| EGAETFADHR         | +2 | 566.7590 | 1131.5035 | 1131.4945 | 0.01  | 50  | 5  |  |
| MATNAAAQNAIK       | +2 | 602.3158 | 1202.6170 | 1202.6077 | 0.01  | 88  | 13 |  |
| VLVQNAAGSQEK       | +2 | 622.3403 | 1242.6660 | 1242.6568 | 0.01  | 69  | 21 |  |
| ADAEGESDLENSRK     | +2 | 760.8524 | 1519.6902 | 1519.6750 | 0.02  | 43  | 3  |  |
| STVLQQQYNR         | +2 | 618.8243 | 1235.6340 | 1235.6258 | 0.01  | 57  | 10 |  |
| EVANSTANLVK        | +2 | 573.3157 | 1144.6169 | 1144.6087 | 0.01  | 58  | 37 |  |
| NCGQMSEIEAK        | +2 | 605.2707 | 1208.5268 | 1208.5165 | 0.01  | 85  | 16 |  |
| AAAFEDQENETVVVKEK  | +2 | 953.9852 | 1905.9558 | 1905.9319 | 0.02  | 90  | 18 |  |
| ALDGAFTEENR        | +2 | 611.7925 | 1221.5705 | 1221.5625 | 0.01  | 63  | 6  |  |
| AAAFEDQENETVVVK    | +2 | 825.4115 | 1648.8084 | 1648.7944 | 0.01  | 113 | 6  |  |
| TSTPEDFIR          | +2 | 533.2676 | 1064.5206 | 1064.5138 | 0.01  | 54  | 8  |  |
| VLGEAMTGISQNAK     | +2 | 709.8749 | 1417.7353 | 1417.7235 | 0.01  | 119 | 20 |  |
| DDILNGSHPVSFDK     | +2 | 772.3778 | 1542.7411 | 1542.7314 | 0.01  | 76  | 17 |  |
| SIAAATSALVK        | +2 | 516.3101 | 1030.6056 | 1030.6022 | 0     | 59  | 23 |  |
| NGDTMEYR           | +2 | 493.2091 | 984.4037  | 984.3971  | 0.01  | 54  | 5  |  |
| VGDDPAVWQLK        | +2 | 614.3271 | 1226.6396 | 1226.6295 | 0.01  | 84  | 5  |  |
| AIAVTVQEMVTK       | +2 | 645.3654 | 1288.7162 | 1288.7060 | 0.01  | 95  | 21 |  |
| NGNLPEFGDAIATASK   | +2 | 803.3972 | 1604.7799 | 1603.7841 | 1     | 92  | 14 |  |
| DLDAQASLAAVSQQLAPR | +2 | 891.9768 | 1781.9391 | 1781.9271 | 0.01  | 77  | 19 |  |
| EADESLNFEEQILEAAK  | +2 | 968.4700 | 1934.9255 | 1934.9108 | 0.01  | 107 | 16 |  |
| ALSTDPAAPNLK       | +2 | 599.3318 | 1196.6491 | 1196.6401 | 0.01  | 67  | 19 |  |
| AAMEPIVISAK        | +2 | 565.3215 | 1128.6285 | 1128.6212 | 0.01  | 57  | 6  |  |
| IGITNHDEYSLVR      | +2 | 758.8995 | 1515.7844 | 1515.7681 | 0.02  | 70  | 8  |  |
| ALGDLISATK         | +2 | 494.7898 | 987.5650  | 987.5600  | 0.01  | 76  | 11 |  |
| TMLESAGGLIQTAR     | +2 | 724.3882 | 1446.7619 | 1446.7500 | 0.01  | 105 | 14 |  |
| LLGEIAQGNENYAGIAAR | +2 | 930.4915 | 1858.9685 | 1858.9536 | 0.01  | 103 | 3  |  |
| NLGTALAE LR        | +2 | 529.3049 | 1056.5952 | 1056.5927 | 0     | 71  | 13 |  |
| ILAQATSDLVNAIK     | +2 | 728.9280 | 1455.8414 | 1455.8297 | 0.01  | 106 | 6  |  |
| GLAGAVSELLR        | +2 | 543.3223 | 1084.6301 | 1084.6240 | 0.01  | 75  | 20 |  |
| AVAEQIPLLQGV R     | +2 | 746.9517 | 1491.8888 | 1491.8772 | 0.01  | 91  | 35 |  |
| TMQFEPSTMVYDACR    | +2 | 889.8886 | 1777.7627 | 1777.7473 | 0.02  | 48  | 5  |  |
| QEDVIATANLSR       | +2 | 658.8492 | 1315.6839 | 1315.6732 | 0.01  | 86  | 24 |  |
| TANPTAKR           | +2 | 429.7465 | 857.4784  | 857.4719  | 0.01  | 44  | 1  |  |
| EAAFHPEVAPDVR      | +2 | 719.3655 | 1436.7164 | 1436.7048 | 0.01  | 59  | 6  |  |
| ALDGAFTEENRAQCR    | +2 | 840.8982 | 1679.7818 | 1679.7685 | 0.01  | 41  | 5  |  |
| EQGVVEEHETLLLR     | +2 | 776.9105 | 1551.8064 | 1551.7892 | 0.02  | 51  | 2  |  |
| TLREQGVVEEHETLLLR  | +2 | 962.0256 | 1922.0366 | 1922.0221 | 0.01  | 72  | 6  |  |
| QKLHTDDELNWL DHGR  | +3 | 659.6611 | 1975.9616 | 1975.9500 | 0.01  | 44  | 5  |  |
| GIWLEAGK           | +2 | 437.2479 | 872.4813  | 872.4756  | 0.01  | 45  | 4  |  |
| AVASAAAALVLK       | +2 | 542.8433 | 1083.6721 | 1083.6651 | 0.01  | 77  | 15 |  |
| GAAAHDPDSEEQQR     | +3 | 508.5698 | 1522.6876 | 1522.6760 | 0.01  | 52  | 5  |  |
| VKADQDSEAMKR       | +2 | 689.3489 | 1376.6832 | 1376.6718 | 0.01  | 75  | 51 |  |
| RQFVQSAK           | +2 | 482.2749 | 962.5352  | 962.5297  | 0.01  | 60  | 8  |  |
| LQAAGNAVK          | +2 | 436.2562 | 870.4978  | 870.4923  | 0.01  | 50  | 11 |  |
| MATNAAAQNAIKK      | +2 | 666.3640 | 1330.7134 | 1330.7027 | 0.01  | 106 | 11 |  |

Identified Human Platelet Proteins

|                                 |    |           |           |           |       |     |     |  |  |
|---------------------------------|----|-----------|-----------|-----------|-------|-----|-----|--|--|
| KSTVLQQQYNR                     | +2 | 682.8716  | 1363.7287 | 1363.7208 | 0.01  | 90  | 7   |  |  |
| TVKAVEDEATKGTR                  | +3 | 502.2708  | 1503.7906 | 1503.7892 | 0     | 41  | 1   |  |  |
| ALEATTEHIR                      | +2 | 570.8077  | 1139.6009 | 1139.5935 | 0.01  | 55  | 1   |  |  |
| ELMEEKKDEGTGTLR                 | +2 | 868.4362  | 1734.8578 | 1734.8457 | 0.01  | 79  | 4   |  |  |
| LAQAAQSSVATITR                  | +2 | 708.8995  | 1415.7845 | 1415.7732 | 0.01  | 115 | 15  |  |  |
| RAIADMLR                        | +2 | 473.2714  | 944.5282  | 944.5225  | 0.01  | 54  | 6   |  |  |
| KGIWLEAGK                       | +2 | 502.2449  | 1002.4753 | 1000.5705 | 1.9   | 42  | 8   |  |  |
| WSVLAGHSR                       | +2 | 506.7728  | 1011.5310 | 1011.5250 | 0.01  | 57  | 3   |  |  |
| AQVVSNLKGISMSSSK                | +2 | 818.4430  | 1634.8714 | 1634.8661 | 0.01  | 64  | 1   |  |  |
| QAAASATQTIAAAQHAASAPK           | +2 | 983.0198  | 1964.0251 | 1964.0075 | 0.02  | 113 | 32  |  |  |
| QVAASTAQLLVACK                  | +2 | 701.8953  | 1401.7761 | 1401.7649 | 0.01  | 82  | 3   |  |  |
| VMVTNVTSLLK                     | +2 | 602.8563  | 1203.6981 | 1203.6897 | 0.01  | 83  | 103 |  |  |
| RVAGSVTELIQAAEAMK               | +2 | 887.4880  | 1772.9615 | 1772.9454 | 0.02  | 89  | 6   |  |  |
| LQAAGNAVKR                      | +2 | 514.3076  | 1026.6006 | 1026.5934 | 0.01  | 81  | 42  |  |  |
| VQELGHGCSALVTK                  | +2 | 721.3835  | 1440.7524 | 1440.7394 | 0.01  | 77  | 8   |  |  |
| AHATGAGPAGR                     | +2 | 483.2526  | 964.4906  | 964.4838  | 0.01  | 57  | 20  |  |  |
| RLLSDSLPPSTGTFQEAQSR            | +3 | 730.7144  | 2189.1214 | 2189.1076 | 0.01  | 83  | 2   |  |  |
| AGALQCSPSDVYTKKELIECAR          | +3 | 794.7372  | 2381.1897 | 2381.1718 | 0.02  | 55  | 2   |  |  |
| ASVPTIQDQASAMQLSQCAK            | +2 | 1039.0178 | 2076.0211 | 2075.9979 | 0.02  | 110 | 2   |  |  |
| MVAAATNNLCEAANAQVGHASQEK        | +3 | 833.7329  | 2498.1769 | 2498.1641 | 0.01  | 72  | 1   |  |  |
| LLAALLEDEGGNGRPLLQAAK           | +2 | 1075.1118 | 2148.2091 | 2148.1902 | 0.02  | 91  | 3   |  |  |
| VSQMAQYFEPLTLAAVGAASK           | +2 | 1091.5740 | 2181.1334 | 2181.1139 | 0.02  | 109 | 16  |  |  |
| AVTDSINQLITMCTQQAPGQK           | +2 | 1124.0692 | 2246.1239 | 2246.1035 | 0.02  | 108 | 14  |  |  |
| KIFQAHK                         | +2 | 436.2639  | 870.5132  | 870.5075  | 0.01  | 46  | 2   |  |  |
| RLQAAGNAVK                      | +2 | 514.3072  | 1026.5998 | 1026.5934 | 0.01  | 44  | 4   |  |  |
| LEQLKPR                         | +2 | 442.2744  | 882.5342  | 882.5287  | 0.01  | 44  | 7   |  |  |
| LKPLPGETMEK                     | +3 | 414.8991  | 1241.6755 | 1241.6689 | 0.01  | 50  | 7   |  |  |
| LASQAKPAVAEENEI GAHIK           | +3 | 740.0710  | 2217.1913 | 2217.1752 | 0.02  | 94  | 9   |  |  |
| ASAGPQPLLVQSCK                  | +2 | 699.8785  | 1397.7425 | 1397.7336 | 0.01  | 99  | 20  |  |  |
| LEHAAKQAAASATQTIAAAQHAASAPK     | +4 | 654.1256  | 2612.4733 | 2613.3622 | -0.88 | 60  | 2   |  |  |
| AEHGSVALPAIMR                   | +2 | 676.3657  | 1350.7169 | 1350.7077 | 0.01  | 78  | 14  |  |  |
| ALGDLISATKAAAGK                 | +2 | 694.3734  | 1386.7322 | 1385.7878 | 0.94  | 44  | 5   |  |  |
| TLSHPQQMALLDQTK                 | +2 | 855.9528  | 1709.8911 | 1709.8770 | 0.01  | 88  | 36  |  |  |
| VLVQNAAGSQEKLAQAAQSSVATITR      | +2 | 1321.2283 | 2640.4420 | 2640.4194 | 0.02  | 138 | 9   |  |  |
| ANQAIQMACQSLGEPGCTQAQVLSAATIVAK | +3 | 1034.5215 | 3100.5426 | 3101.5307 | -0.98 | 89  | 6   |  |  |
| MVGGIAQIIAAQEMLRK               | +2 | 979.5388  | 1957.0630 | 1957.0488 | 0.01  | 117 | 58  |  |  |
| VSHVLAALQAGNR                   | +2 | 668.3826  | 1334.7506 | 1334.7418 | 0.01  | 88  | 15  |  |  |
| VSEKVVSHVLAALQAGNR              | +2 | 890.0049  | 1777.9952 | 1777.9798 | 0.02  | 105 | 5   |  |  |
| AVASAAAALVLKAK                  | +2 | 642.3842  | 1282.7539 | 1282.7972 | -0.03 | 84  | 3   |  |  |
| LAQVAKAVTQALNR                  | +2 | 741.9474  | 1481.8803 | 1481.8678 | 0.01  | 73  | 3   |  |  |
| MVAAATNNLCEAANAQVGHASQEKLISSAK  | +3 | 1033.5270 | 3097.5591 | 3097.5284 | 0.03  | 101 | 5   |  |  |
| GSQAQPDPSPAQLALIAASQSFLQPGGK    | +2 | 1377.7195 | 2753.4244 | 2753.3983 | 0.03  | 128 | 13  |  |  |
| GVGAAATAVTQALNELLQHVK           | +2 | 1046.0898 | 2090.1651 | 2090.1483 | 0.02  | 139 | 51  |  |  |
| RLQAAGNAVKR                     | +2 | 592.3581  | 1182.7016 | 1182.6945 | 0.01  | 52  | 6   |  |  |
| LVQRLEHAAK                      | +2 | 582.8495  | 1163.6845 | 1163.6774 | 0.01  | 52  | 15  |  |  |
| MATNAAAQNAIKKK                  | +2 | 730.4121  | 1458.8097 | 1458.7976 | 0.01  | 45  | 2   |  |  |
| KLEQLKPR                        | +2 | 506.3217  | 1010.6289 | 1010.6236 | 0.01  | 63  | 99  |  |  |



Identified Human Platelet Proteins

|                              |    |          |           |           |           |           |      |     |    |
|------------------------------|----|----------|-----------|-----------|-----------|-----------|------|-----|----|
| ALSTDPAAPNLKSQLAAAAR         | +2 | 983.5488 | 1965.0830 | 1965.0643 | 0.02      | 103       | 8    |     |    |
| SGASGPENFQVGSMPPAQQQVTSGQMHR |    |          | +3        | 971.7920  | 2912.3541 | 2912.3293 | 0.02 | 120 | 26 |
| RVSEKVVSHVLAALQAGNR          | +3 | 645.7060 | 1934.0962 | 1934.0809 | 0.02      | 62        | 2    |     |    |
| KLVRLEHAAK                   | +2 | 646.8975 | 1291.7804 | 1291.7724 | 0.01      | 49        | 4    |     |    |

No. 630. Protein IPI00370107 Matched (SEQUEST MASCOT) N Y emPAI Strategy.Hits 0.27 1 PepMatched(SEQUEST MASCOT) 0 3 0 3 SpectraMatched(SEQUEST MASCOT)

\*Des: PREDICTED: similar to PH domain-containing protein

SEQUEST:(PepMatched Observed.Hits Coverage)

|                                            |        |            |            |              |   |    |   |          |         |
|--------------------------------------------|--------|------------|------------|--------------|---|----|---|----------|---------|
| MASCOT:(PepMatched Observed.Hits Coverage) | 3      | 1          | 8.74%      |              |   |    |   |          |         |
| Seq                                        | Charge | ObservedMS | ExpectedMS | CalculatedMS |   |    |   | PepScore | PepHits |
| QATQVLQEMR                                 | +2     | 602.31     | 1202.61    | 1202.61      | 0 | 53 | 2 |          |         |
| VSWENPSPEEPSVSR                            | +2     | 914.92     | 1827.83    | 1827.83      | 0 | 45 | 1 |          |         |
| DLEELNQESPLVQK                             | +2     | 849.93     | 1697.85    | 1697.85      | 0 | 72 | 1 |          |         |

No. 631. Protein IPI00207355 Matched (SEQUEST MASCOT) Y Y emPAI Strategy.Hits 0.15 3 PepMatched(SEQUEST MASCOT) 4 2 20 3 SpectraMatched(SEQUEST MASCOT)

\*Des: Heat shock-related 70 kDa protein 2

|                                             |        |            |            |              |         |    |   |          |         |
|---------------------------------------------|--------|------------|------------|--------------|---------|----|---|----------|---------|
| SEQUEST:(PepMatched Observed.Hits Coverage) | 4      | 5          | 11.18%     |              |         |    |   |          |         |
| Seq                                         | Charge | Xcor       | Delta      | Probability  | PepHits |    |   |          |         |
| STAGDTHLGGEDFDNR                            | +2     | 4.504      | 0.606      | 1.0000       | 6       |    |   |          |         |
| LLQDFFNKELNK                                | +2     | 4.310      | 0.439      | 1.0000       | 8       |    |   |          |         |
| ARFEELNADLFR                                | +2     | 2.982      | 0.432      | 0.9993       | 10      |    |   |          |         |
| NVLIFDLGGGTFDVSILTIEDGIFEVK                 | +3     | 4.880      | 0.531      | 1.0000       | 5       |    |   |          |         |
| MASCOT:(PepMatched Observed.Hits Coverage)  | 2      | 1          | 6.98%      |              |         |    |   |          |         |
| Seq                                         | Charge | ObservedMS | ExpectedMS | CalculatedMS |         |    |   | PepScore | PepHits |
| STAGDTHLGGEDFDNR                            | +2     | 846.3823   | 1690.7501  | 1690.7183    | 0.03    | 63 | 3 |          |         |
| NVLIFDLGGGTFDVSILTIEDGIFEVK                 | +3     | 971.2007   | 2910.5802  | 2910.5265    | 0.05    | 65 | 1 |          |         |

No. 632. Protein IPI00365286 Matched (SEQUEST MASCOT) Y Y emPAI Strategy.Hits 0.44 5 PepMatched(SEQUEST MASCOT) 32 30 91 111 SpectraMatched(SEQUEST MASCOT)

\*Des: PREDICTED: similar to Vinculin (Metavinculin)

|                                             |        |       |        |             |         |  |  |  |  |
|---------------------------------------------|--------|-------|--------|-------------|---------|--|--|--|--|
| SEQUEST:(PepMatched Observed.Hits Coverage) | 32     | 17    | 32.37% |             |         |  |  |  |  |
| Seq                                         | Charge | Xcor  | Delta  | Probability | PepHits |  |  |  |  |
| ETVQTTEQILKR                                | +2     | 3.873 | 0.469  | 0.9999      | 2       |  |  |  |  |
| NPGNQAAYEHFETMK                             | +2     | 4.985 | 0.597  | 1.0000      | 4       |  |  |  |  |
| QVATALQNLQTK                                | +2     | 4.325 | 0.584  | 1.0000      | 3       |  |  |  |  |
| WIDNPTVDDR                                  | +2     | 3.430 | 0.364  | 0.9993      | 2       |  |  |  |  |
| ETVQTTEQILK                                 | +2     | 3.575 | 0.373  | 0.9993      | 2       |  |  |  |  |
| ELTPQVISAAR                                 | +2     | 2.785 | 0.405  | 0.9984      | 5       |  |  |  |  |
| GWLDRPNASPGDAGEQAIR                         | +3     | 4.047 | 0.407  | 0.9977      | 3       |  |  |  |  |
| VMLVNSMNTVK                                 | +2     | 3.541 | 0.430  | 0.9997      | 2       |  |  |  |  |
| SLLDASEEAIKK                                | +2     | 2.984 | 0.302  | 0.9937      | 3       |  |  |  |  |
| ALASQLQDSLK                                 | +2     | 3.079 | 0.396  | 0.9990      | 5       |  |  |  |  |
| MTGLVDEAIDTK                                | +2     | 4.169 | 0.534  | 1.0000      | 2       |  |  |  |  |
| AQVVSQGLDVLTA                               | +2     | 4.867 | 0.610  | 1.0000      | 4       |  |  |  |  |
| LANVMMGPYR                                  | +2     | 3.101 | 0.348  | 0.9984      | 3       |  |  |  |  |

Identified Human Platelet Proteins

| Seq                                        | Charge | ObservedMS | ExpectedMS | CalculatedMS | Pepscore  | PepHits   |      |    |   |
|--------------------------------------------|--------|------------|------------|--------------|-----------|-----------|------|----|---|
| LLAVAATAPPDAPNREEVFDER                     |        |            |            |              |           |           |      |    |   |
| SLGEIAALTSK                                | +2     | 3.192      | 0.478      | 0.9998       | 2         |           |      |    |   |
| MSAEINEIIR                                 | +2     | 3.347      | 0.357      | 0.9991       | 3         |           |      |    |   |
| MLGQMTDQVADLR                              | +2     | 4.171      | 0.575      | 1.0000       | 2         |           |      |    |   |
| KIDAAQNWLADPNNGGPEGEEQIR                   | +3     |            | 6.028      | 0.518        | 1.0000    | 1         |      |    |   |
| LVQAAQMLQSDPYVSPAR                         | +3     | 3.580      | 0.505      | 1.0000       | 4         |           |      |    |   |
| EAFQFPQEPDFPPPPDLEQLR                      | +2     | 4.032      | 0.560      | 1.0000       | 1         |           |      |    |   |
| MALLMAEMSR                                 | +2     | 3.390      | 0.293      | 0.9979       | 2         |           |      |    |   |
| VLQLTSWDEDAWASK                            | +2     | 4.473      | 0.589      | 1.0000       | 1         |           |      |    |   |
| VAMANIQPQMLVAGATSIAR                       | +2     | 4.957      | 0.533      | 1.0000       | 2         |           |      |    |   |
| TQMQEAMTQEVSDVFSDTTPIK                     | +2     |            | 6.135      | 0.627        | 1.0000    | 3         |      |    |   |
| ELLPVLISAMK                                | +2     | 2.707      | 0.290      | 0.9883       | 3         |           |      |    |   |
| GILSGTSDLLTFDEAEVR                         | +2     | 6.556      | 0.609      | 1.0000       | 3         |           |      |    |   |
| TIESILEPVAQQISHLVIMHEEGEVDGK               | +3     |            | 4.052      | 0.409        | 0.9998    | 4         |      |    |   |
| AIPDLTAPVAAVQAAVSNLVR                      | +2     | 5.233      | 0.708      | 1.0000       | 4         |           |      |    |   |
| STVEGIQASVK                                | +2     | 2.664      | 0.241      | 0.9719       | 2         |           |      |    |   |
| VMLVNSMNTVKELLPVLISAMKIFVTTK               | +3     |            | 5.997      | 0.641        | 1.0000    | 2         |      |    |   |
| GILEYLTVAEVVETMEDLVITYTK                   | +3     |            | 5.895      | 0.385        | 0.9999    | 3         |      |    |   |
| AVAGNISDPGLQK                              | +2     | 2.769      | 0.386      | 0.9968       | 3         |           |      |    |   |
| MASCOT:(PepMatched Observed.Hits Coverage) |        | 30         | 20         | 21.82%       |           |           |      |    |   |
|                                            |        |            |            |              |           |           |      |    |   |
| GNDIAAAK                                   | +2     | 436.7483   | 871.4821   | 871.4763     | 0.01      | 44        | 7    |    |   |
| AVAGNISDPGLQK                              | +2     | 635.3492   | 1268.6838  | 1268.6724    | 0.01      | 66        | 5    |    |   |
| NQGIEEALK                                  | +2     | 501.2697   | 1000.5249  | 1000.5189    | 0.01      | 41        | 2    |    |   |
| MSAEINEIIR                                 | +2     | 588.3124   | 1174.6103  | 1174.6016    | 0.01      | 89        | 10   |    |   |
| VLQLTSWDEDAWASK                            | +2     |            | 874.9302   | 1747.8458    | 1747.8417 | 0         | 58   | 4  |   |
| STVEGIQASVK                                | +2     | 559.8094   | 1117.6043  | 1117.5979    | 0.01      | 56        | 2    |    |   |
| NQGIEEALKNR                                | +2     | 636.3445   | 1270.6744  | 1270.6629    | 0.01      | 48        | 3    |    |   |
| ALASQLQDSLK                                | +2     | 587.3344   | 1172.6542  | 1172.6401    | 0.01      | 42        | 1    |    |   |
| TNLLQVCER                                  | +2     | 538.2853   | 1074.5561  | 1074.5491    | 0.01      | 69        | 3    |    |   |
| MALLMAEMSR                                 | +2     | 576.7853   | 1151.5560  | 1151.5501    | 0.01      | 80        | 9    |    |   |
| QELTHQEHR                                  | +2     | 653.3240   | 1304.6335  | 1304.6221    | 0.01      | 51        | 4    |    |   |
| GLVAEGHR                                   | +2     | 419.7336   | 837.4526   | 837.4456     | 0.01      | 52        | 12   |    |   |
| AANFENHSGR                                 | +2     | 551.7597   | 1101.5049  | 1101.4951    | 0.01      | 74        | 5    |    |   |
| GQGASPVAMQK                                | +2     | 537.2782   | 1072.5418  | 1072.5335    | 0.01      | 53        | 3    |    |   |
| GNDIAAAKR                                  | +2     | 514.7991   | 1027.5836  | 1027.5774    | 0.01      | 55        | 6    |    |   |
| ETVREAEASIK                                | +2     | 652.3516   | 1302.6886  | 1302.6779    | 0.01      | 43        | 1    |    |   |
| IPTISTQLK                                  | +2     | 500.8083   | 999.6021   | 999.5964     | 0.01      | 49        | 7    |    |   |
| VGKETVQTTEDQILKR                           | +2     |            | 923.0148   | 1844.0150    | 1844.0003 | 0.01      | 102  | 11 |   |
| VMLVNSMNTVK                                | +2     | 618.3325   | 1234.6505  | 1234.6413    | 0.01      | 56        | 3    |    |   |
| DMPPAFIKVENACTK                            | +2     |            | 832.4196   | 1662.8247    | 1662.8109 | 0.01      | 71   | 5  |   |
| NSKNQGIEEALKNR                             | +3     | 534.2878   | 1599.8417  | 1599.8328    | 0.01      | 51        | 1    |    |   |
| ALASIDSKLNQAK                              | +2     | 679.8907   | 1357.7668  | 1357.7565    | 0.01      | 46        | 1    |    |   |
| ELLPVLISAMK                                | +2     | 607.3685   | 1212.7224  | 1212.7151    | 0.01      | 68        | 10   |    |   |
| AAVHLEGKIEQAQR                             | +2     | 775.4322   | 1548.8498  | 1548.8372    | 0.01      | 86        | 10   |    |   |
| AIPDLTAPVAAVQAAVSNLVR                      | +2     |            | 1038.6046  | 2075.1947    | 2075.1738 | 0.02      | 114  | 25 |   |
| AAVGAANKSTVEGIQASVKTAR                     | +3     |            |            | 734.0781     | 2199.2124 | 2199.1970 | 0.02 | 84 | 1 |

Identified Human Platelet Proteins

|                        |    |           |           |           |      |    |   |
|------------------------|----|-----------|-----------|-----------|------|----|---|
| VAMANIQPQMLVAGATSIAR   | +2 | 1021.5555 | 2041.0964 | 2041.0812 | 0.02 | 96 | 5 |
| TNLLQVCERIPTISTQLK     | +2 | 1029.0819 | 2056.1493 | 2056.1350 | 0.01 | 79 | 7 |
| VMLVNSMNTVKELLPVLISAMK | +2 | 1215.6868 | 2429.3590 | 2429.3459 | 0.01 | 97 | 3 |
| ELLPVLISAMKIFVTTK      | +2 | 952.0764  | 1902.1382 | 1902.1263 | 0.01 | 84 | 2 |

|          |                                                 |                          |              |                     |                            |                                |
|----------|-------------------------------------------------|--------------------------|--------------|---------------------|----------------------------|--------------------------------|
| No. 633. | Protein                                         | Matched (SEQUEST MASCOT) | emPAI        | Strategy.Hits       | PepMatched(SEQUEST MASCOT) | SpectraMatched(SEQUEST MASCOT) |
|          | IPI00363828                                     | Y Y                      | 0.22         | 4                   | 5 5 8 12                   |                                |
| *Des:    | PREDICTED: ARP3 actin-related protein 3 homolog |                          |              |                     |                            |                                |
|          | SEQUEST:(PepMatched Observed.Hits Coverage)     |                          | 5            | 4                   | 19.84%                     |                                |
|          | Seq                                             | Charge                   | Xcor         | Delta               | Probility                  | PepHits                        |
|          | FLGPEIFFHPEFANPDTQPISEVVDEVIQNCPIDVR            |                          |              |                     | +3 5.008 0.579 1.0000      | 1                              |
|          | DREVGIPPEQSLETAK                                |                          | +2           | 3.894               | 0.483 1.0000               | 2                              |
|          | GVDDLDFFIGDEAIEKPTYATKWPIR                      |                          |              | +3                  | 3.825 0.550 1.0000         | 2                              |
|          | LKLSEELSGGR                                     |                          | +2           | 2.937               | 0.367 0.9982               | 3                              |
|          | TLTGTVIDSGDGVTHVIPVAEGYVIGSCIK                  |                          |              | +3                  | 3.301 0.258 0.9939         | 1                              |
|          | MASCOT:(PepMatched Observed.Hits Coverage)      |                          | 5            | 8                   | 11.74%                     |                                |
|          | Seq                                             | Charge                   | ObservedMS   | ExpectedMS          | CalculatedMS               | Pepscore PepHits               |
|          | LSEELSGGR                                       |                          | +2 474.2457  | 946.4768 946.4719   | 0 65 5                     |                                |
|          | DREVGIPPEQSLETAK                                |                          | +2 884.9622  | 1767.9098 1767.9002 | 0.01 70 1                  |                                |
|          | HGIVEDWDLMER                                    |                          | +2 750.3583  | 1498.7020 1498.6874 | 0.01 79 2                  |                                |
|          | NIVLSGGSTMFR                                    |                          | +2 641.3398  | 1280.6650 1280.6546 | 0.01 74 7                  |                                |
|          | LGYAGNTEPQFIIPSCIAIK                            |                          | +2 1068.0750 | 2134.1354 2134.1132 | 0.02 99 4                  |                                |

|          |                                             |                          |            |                 |                            |                                |
|----------|---------------------------------------------|--------------------------|------------|-----------------|----------------------------|--------------------------------|
| No. 634. | Protein                                     | Matched (SEQUEST MASCOT) | emPAI      | Strategy.Hits   | PepMatched(SEQUEST MASCOT) | SpectraMatched(SEQUEST MASCOT) |
|          | IPI00370038                                 | Y Y                      | 0.51       | 1               | 2 2 2 4                    |                                |
| *Des:    | Interferon-induced protein 35               |                          |            |                 |                            |                                |
|          | SEQUEST:(PepMatched Observed.Hits Coverage) |                          | 2          | 1               | 9.96%                      |                                |
|          | Seq                                         | Charge                   | Xcor       | Delta           | Probility                  | PepHits                        |
|          | VLVSGFPTGLR                                 |                          | +2         | 2.837           | 0.344 0.9931               | 1                              |
|          | LSEEEELDKLEIFFGK                            |                          | +2         | 4.461           | 0.603 1.0000               | 1                              |
|          | MASCOT:(PepMatched Observed.Hits Coverage)  |                          | 2          | 1               | 9.96%                      |                                |
|          | Seq                                         | Charge                   | ObservedMS | ExpectedMS      | CalculatedMS               | Pepscore PepHits               |
|          | VLVSGFPTGLR                                 |                          | +2 573.34  | 1144.66 1144.66 | 0 41 4                     |                                |
|          | LSEEEELDKLEIFFGK                            |                          | +2 955.52  | 1909.02 1909.01 | 0.01 58 2                  |                                |

|          |                                             |                          |            |                 |                            |                                |
|----------|---------------------------------------------|--------------------------|------------|-----------------|----------------------------|--------------------------------|
| No. 635. | Protein                                     | Matched (SEQUEST MASCOT) | emPAI      | Strategy.Hits   | PepMatched(SEQUEST MASCOT) | SpectraMatched(SEQUEST MASCOT) |
|          | IPI00565513                                 | N Y                      | 0.58       | 1               | 0 3 0 18                   |                                |
| *Des:    | 37 kDa protein                              |                          |            |                 |                            |                                |
|          | SEQUEST:(PepMatched Observed.Hits Coverage) |                          |            |                 |                            |                                |
|          | MASCOT:(PepMatched Observed.Hits Coverage)  |                          | 3          | 1               | 18.23%                     |                                |
|          | Seq                                         | Charge                   | ObservedMS | ExpectedMS      | CalculatedMS               | Pepscore PepHits               |
|          | GAAQNIIPASTGAAK                             |                          | +2 685.28  | 1368.55 1368.74 | -0.18 80 30                |                                |
|          | RVIIISAPSADAPMFVMGVNHEK                     |                          | +3 790.42  | 2368.22 2368.20 | 0.02 55 6                  |                                |
|          | VIHDNFGIVEGLMTTVHAITATQK                    |                          | +3 865.79  | 2594.35 2594.35 | 0 75 4                     |                                |

|          |             |                          |       |               |                            |                                |
|----------|-------------|--------------------------|-------|---------------|----------------------------|--------------------------------|
| No. 636. | Protein     | Matched (SEQUEST MASCOT) | emPAI | Strategy.Hits | PepMatched(SEQUEST MASCOT) | SpectraMatched(SEQUEST MASCOT) |
|          | IPI00203214 | Y Y                      | 0.39  | 3             | 10 9 14 11                 |                                |

Identified Human Platelet Proteins

| *Des:                                       |        | Elongation factor 2 |            |              |         |        |          |         |  |  |  |
|---------------------------------------------|--------|---------------------|------------|--------------|---------|--------|----------|---------|--|--|--|
| SEQUEST:(PepMatched Observed.Hits Coverage) |        | 10                  | 4          |              |         | 20.06% |          |         |  |  |  |
| Seq                                         | Charge | Xcor                | Delta      | Probility    | PepHits |        |          |         |  |  |  |
| VFSGVVSTGLK                                 | +2     |                     | 3.268      | 0.507        | 0.9999  | 2      |          |         |  |  |  |
| VNFTVDQIR                                   | +2     |                     | 3.382      | 0.364        | 0.9995  | 1      |          |         |  |  |  |
| ARPPFDGLAEDIDKGEVSAR                        | +3     |                     | 5.565      | 0.541        | 1.0000  | 4      |          |         |  |  |  |
| VFDAIMNFR                                   | +2     |                     | 3.209      | 0.513        | 0.9999  | 1      |          |         |  |  |  |
| AYLPVNESFGFTADLR                            | +2     |                     | 4.498      | 0.524        | 1.0000  | 3      |          |         |  |  |  |
| ALLELQLEPEELYQTFQR                          | +2     |                     | 4.589      | 0.602        | 1.0000  | 1      |          |         |  |  |  |
| DGSGFLINLIDSPGHVDFSSEVTAALR                 | +3     |                     | 5.937      | 0.665        | 1.0000  | 2      |          |         |  |  |  |
| EGIPALDNFLDK                                | +2     |                     | 3.078      | 0.505        | 0.9937  | 1      |          |         |  |  |  |
| STAISLFYELSENDLNFIK                         | +2     |                     | 4.584      | 0.583        | 1.0000  | 2      |          |         |  |  |  |
| WLPAGDALLQMITIHLPSVTAQK                     | +2     |                     | 5.206      | 0.528        | 1.0000  | 3      |          |         |  |  |  |
| MASCOT:(PepMatched Observed.Hits Coverage)  |        | 9                   | 4          |              |         | 16.85% |          |         |  |  |  |
| Seq                                         | Charge | ObservedMS          | ExpectedMS | CalculatedMS |         |        | Pepscore | PepHits |  |  |  |
| GVQYLNEIK                                   | +2     | 533.27              | 1064.53    | 1062.57      | 1.96    | 41     | 2        |         |  |  |  |
| VNFTVDQIR                                   | +2     | 546.30              | 1090.58    | 1090.58      | 0       | 60     | 1        |         |  |  |  |
| VFSGVVSTGLK                                 | +2     | 547.32              | 1092.62    | 1092.62      | 0       | 65     | 2        |         |  |  |  |
| ARPPFDGLAEDIDKGEVSAR                        | +3     | 715.03              | 2142.08    | 2142.07      | 0.01    | 64     | 1        |         |  |  |  |
| VFDAIMNFR                                   | +2     | 556.78              | 1111.55    | 1111.55      | 0       | 49     | 1        |         |  |  |  |
| AYLPVNESFGFTADLR                            | +2     | 900.46              | 1798.91    | 1798.89      | 0.02    | 86     | 3        |         |  |  |  |
| EGIPALDNFLDKL                               | +2     | 722.89              | 1443.77    | 1443.76      | 0.01    | 53     | 1        |         |  |  |  |
| WLPAGDALLQMITIHLPSVTAQK                     | +3     | 867.49              | 2599.44    | 2599.42      | 0.02    | 58     | 1        |         |  |  |  |
| DGSGFLINLIDSPGHVDFSSEVTAALR                 | +3     | 939.81              | 2816.42    | 2816.40      | 0.02    | 88     | 2        |         |  |  |  |

| No.  | Protein     | Matched (SEQUEST MASCOT) | emPAI | Strategy.Hits | PepMatched(SEQUEST MASCOT) | SpectraMatched(SEQUEST MASCOT) |
|------|-------------|--------------------------|-------|---------------|----------------------------|--------------------------------|
| 637. | IPI00204884 | Y N                      | 0.15  | 1             | 2 0 4 0                    |                                |

| *Des:                                       |        | 57 kDa protein |       |           |         |       |  |  |  |  |  |
|---------------------------------------------|--------|----------------|-------|-----------|---------|-------|--|--|--|--|--|
| SEQUEST:(PepMatched Observed.Hits Coverage) |        | 2              | 1     |           |         | 6.22% |  |  |  |  |  |
| Seq                                         | Charge | Xcor           | Delta | Probility | PepHits |       |  |  |  |  |  |
| HSQFIGYPITLFVEK                             | +2     |                | 4.866 | 0.575     | 1.0000  | 4     |  |  |  |  |  |
| YESLTDP SKLDSGK                             | +2     |                | 3.326 | 0.357     | 0.9523  | 1     |  |  |  |  |  |
| MASCOT:(PepMatched Observed.Hits Coverage)  |        |                |       |           |         |       |  |  |  |  |  |

| No.  | Protein     | Matched (SEQUEST MASCOT) | emPAI | Strategy.Hits | PepMatched(SEQUEST MASCOT) | SpectraMatched(SEQUEST MASCOT) |
|------|-------------|--------------------------|-------|---------------|----------------------------|--------------------------------|
| 638. | IPI00191073 | Y Y                      | 0.48  | 2             | 4 3 6 4                    |                                |

| *Des:                                       |        | PREDICTED: similar to Poly(rC)-binding protein 1 (Alpha-CP1) (hnRNP-E1) |            |              |         |        |          |         |  |  |  |
|---------------------------------------------|--------|-------------------------------------------------------------------------|------------|--------------|---------|--------|----------|---------|--|--|--|
| SEQUEST:(PepMatched Observed.Hits Coverage) |        | 4                                                                       | 2          |              |         | 22.37% |          |         |  |  |  |
| Seq                                         | Charge | Xcor                                                                    | Delta      | Probility    | PepHits |        |          |         |  |  |  |
| ESTGAQVQVAGDMLPNSTER                        | +2     |                                                                         | 5.893      | 0.589        | 1.0000  | 3      |          |         |  |  |  |
| LEEDINSSMTNSTAASRPPVTLR                     | +3     |                                                                         | 3.587      | 0.272        | 0.9935  | 1      |          |         |  |  |  |
| IITLTGPTNAIFK                               | +2     |                                                                         | 3.978      | 0.477        | 0.9998  | 3      |          |         |  |  |  |
| QVTITGSAASISLAQYLINAR                       | +3     |                                                                         | 3.820      | 0.431        | 0.9998  | 2      |          |         |  |  |  |
| MASCOT:(PepMatched Observed.Hits Coverage)  |        | 3                                                                       | 2          |              |         | 16.57% |          |         |  |  |  |
| Seq                                         | Charge | ObservedMS                                                              | ExpectedMS | CalculatedMS |         |        | Pepscore | PepHits |  |  |  |
| LEEDINSSMTNSTAASRPPVTLR                     | +3     | 830.42                                                                  | 2488.24    | 2488.22      | 0.02    | 56     | 1        |         |  |  |  |
| IITLTGPTNAIFK                               | +2     | 694.92                                                                  | 1387.82    | 1387.81      | 0.01    | 62     | 3        |         |  |  |  |

Identified Human Platelet Proteins

QVTITGSAASISLAQYLINAR +3 726.41 2176.20 2176.19 0.01 44 1

No. 639. Protein IPI00389890 Matched (SEQUEST MASCOT) N Y emPAI 0.24 Strategy.Hits 2 PepMatched(SEQUEST MASCOT) 0 SpectraMatched(SEQUEST MASCOT) 7 0 40

\*Des: Splice Isoform 5 of Dynamin 1-like protein

SEQUEST:(PepMatched Observed.Hits Coverage)

MASCOT:(PepMatched Observed.Hits Coverage) 7 2 16.11%

| Seq                           | Charge | ObservedMS | ExpectedMS | CalculatedMS | PepScore | PepHits |
|-------------------------------|--------|------------|------------|--------------|----------|---------|
| RPLILQLVHVSPEDK+3             |        | 582.01     | 1743.01    | 1743.00      | 0.01     | 46 6    |
| SVTDSIRDEYAFLLQK+2            |        | 886.45     | 1770.88    | 1770.88      | 0        | 43 18   |
| SATLLQLITK                    | +2     | 544.34     | 1086.66    | 1086.66      | 0        | 78 2    |
| DTLQSELVGLYK                  | +2     | 747.40     | 1492.78    | 1492.78      | 0        | 56 2    |
| LDLMDAGTDAMDVLMGR             | +2     | 912.42     | 1822.83    | 1822.83      | 0        | 56 12   |
| SLLDDLLTESEDMAQR              | +2     | 961.96     | 1921.90    | 1921.89      | 0.01     | 76 6    |
| LQDVFNTVGADIIQLPQIVVVGTSQSSGK | +3     | 976.20     | 2925.59    | 2925.58      | 0.01     | 81 6    |

No. 640. Protein IPI00558156 Matched (SEQUEST MASCOT) N Y emPAI 0.4 Strategy.Hits 1 PepMatched(SEQUEST MASCOT) 0 SpectraMatched(SEQUEST MASCOT) 4 0 23

\*Des: 61 kDa protein

SEQUEST:(PepMatched Observed.Hits Coverage)

MASCOT:(PepMatched Observed.Hits Coverage) 4 1 8.63%

| Seq             | Charge | ObservedMS | ExpectedMS | CalculatedMS | PepScore | PepHits |
|-----------------|--------|------------|------------|--------------|----------|---------|
| SAVGHEYQSK      | +2     | 553.2708   | 1104.5271  | 1104.5199    | 0.01     | 68 6    |
| HCSQVDSVR       | +2     | 515.7438   | 1029.4730  | 1029.4662    | 0.01     | 68 8    |
| YGVQADRVDK      | +2     | 575.8010   | 1149.5874  | 1149.5778    | 0.01     | 49 1    |
| TVQGSQGHQEHINIK | +2     | 842.9349   | 1683.8553  | 1683.8441    | 0.01     | 79 20   |

No. 641. Protein IPI00475634 Matched (SEQUEST MASCOT) N Y emPAI 0.4 Strategy.Hits 1 PepMatched(SEQUEST MASCOT) 0 SpectraMatched(SEQUEST MASCOT) 2 0 2

\*Des: Tropomyosin

SEQUEST:(PepMatched Observed.Hits Coverage)

MASCOT:(PepMatched Observed.Hits Coverage) 2 1 6.34%

| Seq      | Charge | ObservedMS | ExpectedMS | CalculatedMS | PepScore | PepHits |
|----------|--------|------------|------------|--------------|----------|---------|
| LLSNELK  | +2     | 408.7660   | 815.5175   | 815.4752     | 0.04     | 41 1    |
| ILTDKLLK | +2     | 415.7736   | 829.5327   | 829.5273     | 0.01     | 42 1    |

No. 642. Protein IPI00476292 Matched (SEQUEST MASCOT) N Y emPAI 0.16 Strategy.Hits 1 PepMatched(SEQUEST MASCOT) 0 SpectraMatched(SEQUEST MASCOT) 5 0 17

\*Des: 120 kDa protein

SEQUEST:(PepMatched Observed.Hits Coverage)

MASCOT:(PepMatched Observed.Hits Coverage) 5 1 7%

| Seq                     | Charge | ObservedMS | ExpectedMS | CalculatedMS | PepScore | PepHits |
|-------------------------|--------|------------|------------|--------------|----------|---------|
| SSTVAPTLPGQEVK          | +2     | 657.36     | 1312.70    | 1312.70      | 0        | 41 2    |
| ALYSEYTDGTFK            | +2     | 748.35     | 1494.69    | 1494.69      | 0        | 49 3    |
| AGLQAFFQVR              | +2     | 568.81     | 1135.61    | 1135.61      | 0        | 52 6    |
| DIFTGLIGPMK             | +2     | 596.33     | 1190.64    | 1190.64      | 0        | 42 3    |
| GPDEEHLGILGPVIWAEVGDIIK | +3     | 829.11     | 2484.31    | 2484.30      | 0.01     | 41 3    |

Identified Human Platelet Proteins

No. 643. Protein IPI00476439 Matched (SEQUEST MASCOT) N Y emPAI 0.02 Strategy.Hits 1 PepMatched(SEQUEST MASCOT) 0 SpectraMatched(SEQUEST MASCOT) 2 0 4

\*Des: 245 kDa protein

SEQUEST:(PepMatched Observed.Hits Coverage)

MASCOT:(PepMatched Observed.Hits Coverage) 2 1 1.15%

| Seq          | Charge | ObservedMS | ExpectedMS | CalculatedMS | Pepscore | PepHits |
|--------------|--------|------------|------------|--------------|----------|---------|
| AMNNSWHPECFR | +2     | 746.3251   | 1490.6356  | 1490.6183    | 0.02     | 60      |
| FVEFDMKPVCK  | +2     | 671.8322   | 1341.6498  | 1341.6461    | 0        | 44      |

No. 644. Protein IPI00327185 Matched (SEQUEST MASCOT) Y N emPAI 0.46 Strategy.Hits 2 PepMatched(SEQUEST MASCOT) 5 SpectraMatched(SEQUEST MASCOT) 0 5 0

\*Des: Nap111 protein

SEQUEST:(PepMatched Observed.Hits Coverage) 5 2 18.34%

| Seq                 | Charge | Xcor  | Delta | Probility | PepHits |
|---------------------|--------|-------|-------|-----------|---------|
| FYEEVHDLER          | +2     | 2.749 | 0.399 | 0.9985    | 4       |
| LDGLVDTPGTGYIESLPK  | +2     | 2.818 | 0.499 | 0.9988    | 1       |
| YAVLYQPLFDK         | +2     | 2.875 | 0.428 | 0.9991    | 1       |
| QLTVQMMQNPQILAALQER | +2     | 5.488 | 0.604 | 1.0000    | 1       |
| GIPEFWLTVFK         | +2     | 3.332 | 0.406 | 0.9995    | 1       |

MASCOT:(PepMatched Observed.Hits Coverage)

No. 645. Protein IPI00475639 Matched (SEQUEST MASCOT) N Y emPAI 0.35 Strategy.Hits 3 PepMatched(SEQUEST MASCOT) 0 SpectraMatched(SEQUEST MASCOT) 19 0 361

\*Des: PREDICTED: similar to tubulin, beta 2

SEQUEST:(PepMatched Observed.Hits Coverage)

MASCOT:(PepMatched Observed.Hits Coverage) 19 8 27.21%

| Seq                        | Charge | ObservedMS | ExpectedMS | CalculatedMS | Pepscore | PepHits |
|----------------------------|--------|------------|------------|--------------|----------|---------|
| AILVDLEPGTMDSVR            | +2     | 808.4290   | 1614.8435  | 1614.8287    | 0.01     | 68      |
| TAVCDIPPR                  | +2     | 486.2559   | 970.4972   | 970.4906     | 0.01     | 59      |
| EVDEQMLNVQNK               | +2     | 723.8541   | 1445.6937  | 1445.6820    | 0.01     | 91      |
| MSMKEVDEQMLNVQNK           | +2     | 962.4619   | 1922.9092  | 1922.8899    | 0.02     | 84      |
| ISEQFTAMFR                 | +2     | 615.3072   | 1228.5998  | 1228.5910    | 0.01     | 63      |
| ALTVPELTQQMFDSK            | +2     | 854.4415   | 1706.8685  | 1706.8549    | 0.01     | 44      |
| NSSYFVEWIPNNVK             | +2     | 848.9265   | 1695.8385  | 1695.8256    | 0.01     | 68      |
| GHYTEGAELVDSVLDVVR         | +2     | 980.0010   | 1957.9875  | 1957.9744    | 0.01     | 123     |
| NMMAACDPR                  | +2     | 504.7097   | 1007.4049  | 1007.3987    | 0.01     | 51      |
| INVYYNEAAGNKYVPR           | +2     | 935.9875   | 1869.9604  | 1869.9373    | 0.02     | 83      |
| FPGQLNADLR                 | +2     | 565.8051   | 1129.5956  | 1129.5880    | 0.01     | 59      |
| YLTVAIFR                   | +2     | 527.3110   | 1052.6074  | 1052.6018    | 0.01     | 62      |
| RISEQFTAMFR                | +2     | 693.3569   | 1384.6992  | 1384.6921    | 0.01     | 63      |
| EIVHIQAGQCGNQIGAK          | +2     | 883.4585   | 1764.9024  | 1764.8940    | 0.01     | 93      |
| LAVNMVPPFR                 | +2     | 571.7278   | 1141.4410  | 1142.6270    | -1.18    | 84      |
| MSATFIGNSTAIQELFKR         | +2     | 1007.5355  | 2013.0564  | 2013.0353    | 0.02     | 52      |
| SGPFGQIFRPDNFVFGQSGAGNNWAK | +3     | 933.4606   | 2797.3599  | 2797.3360    | 0.02     | 83      |
| LTTPTYGDLNHLVSATMSGVTTCLR  | +2     | 1326.1707  | 2650.3268  | 2650.3094    | 0.02     | 125     |
| FPGQLNADLRK                | +2     | 629.8528   | 1257.6910  | 1257.6829    | 0.01     | 43      |

Identified Human Platelet Proteins

No. 646. Protein IPI00563778 Matched (SEQUEST MASCOT) N Y emPAI 0.65 Strategy.Hits 1 PepMatched(SEQUEST MASCOT) 0 SpectraMatched(SEQUEST MASCOT) 9 0 33

\*Des: Apolipoprotein A-I

SEQUEST:(PepMatched Observed.Hits Coverage)

MASCOT:(PepMatched Observed.Hits Coverage) 9 1 39.77%

| Seq                 | Charge | ObservedMS | ExpectedMS | CalculatedMS | PepScore  | PepHits     |
|---------------------|--------|------------|------------|--------------|-----------|-------------|
| VVAEEFR             | +2     | 425.2296   | 848.4447   | 848.4392     | 0.01      | 45 6        |
| DSGRDYVSQFESSTLGK   | +2     |            | 938.4471   | 1874.8796    | 1874.8646 | 0.01 102 20 |
| VKDFATVYVDAVK       | +2     | 728.8663   | 1455.7180  | 1453.7816    | 1.94      | 67 2        |
| NEMNKDLENVK         | +2     | 667.3311   | 1332.6477  | 1332.6343    | 0.01      | 66 2        |
| NEMNKDLENVKQK       | +2     | 795.4087   | 1588.8028  | 1588.7878    | 0.01      | 82 6        |
| AKPALDDLQGLMPVLEAWK | +2     |            | 1076.5842  | 2151.1539    | 2151.1397 | 0.01 115 3  |
| NHPTLIEYHTK         | +3     | 451.5728   | 1351.6964  | 1351.6884    | 0.01      | 57 10       |
| QKLEPLGTELHK        | +2     | 696.9003   | 1391.7861  | 1391.7772    | 0.01      | 48 2        |
| LTEIKNHPTLIEYHTK    | +2     |            | 969.0361   | 1936.0576    | 1936.0418 | 0.02 78 8   |

No. 647. Protein IPI00231631 Matched (SEQUEST MASCOT) Y N emPAI 0.25 Strategy.Hits 2 PepMatched(SEQUEST MASCOT) 3 SpectraMatched(SEQUEST MASCOT) 0 15 0

\*Des: Beta enolase

SEQUEST:(PepMatched Observed.Hits Coverage) 3 4 11.33%

| Seq               | Charge | Xcor | Delta | Probability | PepHits  |
|-------------------|--------|------|-------|-------------|----------|
| AAVPSGASTGIYEALER | +2     |      | 5.474 | 0.578       | 1.0000 8 |
| LAQSNQWGMVMSHR    | +3     |      | 2.811 | 0.284       | 0.9966 4 |
| FGANAILGVSLAVCK   | +2     |      | 4.918 | 0.549       | 1.0000 9 |

MASCOT:(PepMatched Observed.Hits Coverage)

No. 648. Protein IPI00230830 Matched (SEQUEST MASCOT) Y Y emPAI 0.53 Strategy.Hits 1 PepMatched(SEQUEST MASCOT) 6 SpectraMatched(SEQUEST MASCOT) 5 12 15

\*Des: Eukaryotic translation initiation factor 2 subunit 1

SEQUEST:(PepMatched Observed.Hits Coverage) 6 1 26.56%

| Seq                  | Charge | Xcor  | Delta | Probability | PepHits  |
|----------------------|--------|-------|-------|-------------|----------|
| EVLINNINR            | +2     | 2.734 | 0.253 | 0.9839      | 5        |
| YVMTTTTLER           | +2     | 3.013 | 0.478 | 0.9996      | 5        |
| HVAEVLEYTKDEQLESFLQK | +3     |       | 3.271 | 0.471       | 0.9979 1 |
| FPEVEDVVMVNVK        | +2     | 4.356 | 0.474 | 1.0000      | 5        |
| TEGLSVLNQAMAVIK      | +2     |       | 4.341 | 0.413       | 0.9997 5 |
| VVTDTDELAR           | +2     | 3.611 | 0.505 | 1.0000      | 2        |

MASCOT:(PepMatched Observed.Hits Coverage) 5 1 20%

| Seq             | Charge | ObservedMS | ExpectedMS | CalculatedMS | PepScore | PepHits   |
|-----------------|--------|------------|------------|--------------|----------|-----------|
| VVTDTDELAR      | +2     | 674.84     | 1347.66    | 1347.65      | 0.01     | 84 2      |
| EVLINNINR       | +2     | 542.81     | 1083.61    | 1083.60      | 0.01     | 47 3      |
| YVMTTTTLER      | +2     | 607.81     | 1213.61    | 1213.60      | 0.01     | 57 5      |
| FPEVEDVVMVNVK   | +2     | 766.90     | 1531.78    | 1531.77      | 0.01     | 82 3      |
| TEGLSVLNQAMAVIK | +2     |            | 787.44     | 1572.87      | 1572.85  | 0.02 84 4 |

No. Protein Matched (SEQUEST MASCOT) emPAI Strategy.Hits PepMatched(SEQUEST MASCOT) SpectraMatched(SEQUEST MASCOT)

Identified Human Platelet Proteins

649. IPI00231633 Y N 0.19 1 4 0 11 0  
 \*Des: Ras-related protein Rab-1B  
 SEQUEST:(PepMatched Observed.Hits Coverage) 4 1 39.51%  
 Seq Charge Xcor Delta Probability PepHits  
 FADDTYTESYISTIGVDFK +2 4.388 0.626 1.0000 7  
 NATNVEQAFMTMAAEIK +3 4.630 0.457 1.0000 2  
 QWLQEIDRYASENVNK +2 4.204 0.459 0.9981 2  
 KVDNTTAKEFADSLGVPFLETSK +3 6.652 0.508 1.0000 2  
 MASCOT:(PepMatched Observed.Hits Coverage)

No. Protein Matched (SEQUEST MASCOT) emPAI Strategy.Hits PepMatched(SEQUEST MASCOT) SpectraMatched(SEQUEST MASCOT)  
 650. IPI00208306 N Y 1.04 1 0 4 0 15  
 \*Des: Translationally controlled tumor protein  
 SEQUEST:(PepMatched Observed.Hits Coverage)  
 MASCOT:(PepMatched Observed.Hits Coverage) 4 1 24.57%  
 Seq Charge ObservedMS ExpectedMS CalculatedMS Pepscore PepHits  
 DLISHDELFSDIYK +2 847.9249 1693.8352 1693.8199 0.02 91 6  
 GKLEEQKPER +2 607.3333 1212.6520 1212.6462 0.01 41 4  
 VKPFMTGAAEQIK +2 710.3920 1418.7695 1418.7591 0.01 64 5  
 SLKGKLEEQKPER +2 771.4437 1540.8728 1540.8572 0.02 43 8

No. Protein Matched (SEQUEST MASCOT) emPAI Strategy.Hits PepMatched(SEQUEST MASCOT) SpectraMatched(SEQUEST MASCOT)  
 651. IPI00569803 N Y 2.55 1 0 5 0 35  
 \*Des: PREDICTED: similar to myosin regulatory light chain-like  
 SEQUEST:(PepMatched Observed.Hits Coverage)  
 MASCOT:(PepMatched Observed.Hits Coverage) 5 1 33.08%  
 Seq Charge ObservedMS ExpectedMS CalculatedMS Pepscore PepHits  
 LNGTDPEDVIR +2 614.81 1227.61 1227.61 0 70 22  
 GNFNIEFTR +2 630.80 1259.59 1259.59 0 65 6  
 KGNFNIEFTR +2 694.85 1387.69 1387.69 0 41 9  
 FTDEEVDELYR +2 708.32 1414.63 1414.63 0 59 6  
 ELLTTMGDRFTDEEVDELYR +3 811.38 2431.11 2431.12 0 52 10

No. Protein Matched (SEQUEST MASCOT) emPAI Strategy.Hits PepMatched(SEQUEST MASCOT) SpectraMatched(SEQUEST MASCOT)  
 652. IPI00364707 N Y 0.37 1 0 2 0 2  
 \*Des: Similar to gp25L2 protein  
 SEQUEST:(PepMatched Observed.Hits Coverage)  
 MASCOT:(PepMatched Observed.Hits Coverage) 2 1 9.62%  
 Seq Charge ObservedMS ExpectedMS CalculatedMS Pepscore PepHits  
 QLVEQVEQIQK +2 671.38 1340.74 1340.73 0.01 44 1  
 FSLFAGGMLR +2 549.79 1097.57 1097.57 0 46 2

No. Protein Matched (SEQUEST MASCOT) emPAI Strategy.Hits PepMatched(SEQUEST MASCOT) SpectraMatched(SEQUEST MASCOT)  
 653. IPI00454375 N Y 0.1 1 0 2 0 9  
 \*Des: Pkm2 protein  
 SEQUEST:(PepMatched Observed.Hits Coverage)  
 MASCOT:(PepMatched Observed.Hits Coverage) 2 1 6.45%



Identified Human Platelet Proteins

| Seq             | Charge | ObservedMS | ExpectedMS | CalculatedMS |           | Pepscore | PepHits |
|-----------------|--------|------------|------------|--------------|-----------|----------|---------|
| DAVLDAWAEDVDLR  |        | +2         | 794.4016   | 1586.7885    | 1586.7576 | 0.03     | 103     |
| FGVEQDVMVFASFIR |        | +3         | 620.6484   | 1858.9233    | 1858.8923 | 0.03     | 36      |

No. 654. Protein IPI00400691 Matched (SEQUEST MASCOT) Y N emPAI 0.26 Strategy.Hits 1 2 PepMatched(SEQUEST MASCOT) 0 3 SpectraMatched(SEQUEST MASCOT) 0  
 \*Des: Myeloid differentiation primary response gene 88  
 SEQUEST:(PepMatched Observed.Hits Coverage) 2 1 14.28%  

| Seq                     | Charge | Xcor | Delta | Proability | PepHits |
|-------------------------|--------|------|-------|------------|---------|
| LLELLALLDREDILYELK      |        | +3   | 3.163 | 0.366      | 0.9739  |
| VGSVSVDSYLFSLPLVALNVGVR |        | +3   | 4.656 | 0.413      | 0.9997  |

  
 MASCOT:(PepMatched Observed.Hits Coverage) 2

No. 655. Protein IPI00230835 Matched (SEQUEST MASCOT) Y Y emPAI 0.92 Strategy.Hits 5 8 PepMatched(SEQUEST MASCOT) 7 46 SpectraMatched(SEQUEST MASCOT) 59  
 \*Des: 14-3-3 protein gamma  
 SEQUEST:(PepMatched Observed.Hits Coverage) 8 6 31.07%  

| Seq                      | Charge | Xcor | Delta | Proability | PepHits |
|--------------------------|--------|------|-------|------------|---------|
| NVTELNEPLSNEER           |        | +2   | 4.966 | 0.539      | 1.0000  |
| LAEQAERYDDMAAMK          |        | +3   | 2.968 | 0.398      | 0.9996  |
| ELEAVCQDVLSLLDNYLIK      |        | +3   | 3.344 | 0.329      | 0.9994  |
| IEKELEAVCQDVLSLLDNYLIK   |        | +3   | 5.318 | 0.458      | 1.0000  |
| AYSEAHEISK               |        | +2   | 3.320 | 0.330      | 0.9981  |
| EKIEKELEAVCQDVLSLLDNYLIK |        | +3   | 4.189 | 0.284      | 0.9665  |
| EHMQPHTPIR               |        | +2   | 2.913 | 0.474      | 0.9994  |
| AYSEAHEISKEHMQPHTPIR     |        | +3   | 5.425 | 0.540      | 1.0000  |

  
 MASCOT:(PepMatched Observed.Hits Coverage) 7 7 26.69%  

| Seq            | Charge | ObservedMS | ExpectedMS | CalculatedMS |         | Pepscore | PepHits |
|----------------|--------|------------|------------|--------------|---------|----------|---------|
| ATVVESSEK      |        | +2         | 475.25     | 948.48       | 948.48  | 0        | 42      |
| YLAEVATGEK     |        | +2         | 540.79     | 1079.56      | 1079.55 | 0.01     | 54      |
| AYSEAHEISK     |        | +2         | 567.78     | 1133.54      | 1133.54 | 0        | 65      |
| YLAEVATGEKR    |        | +2         | 618.84     | 1235.67      | 1235.65 | 0.02     | 43      |
| NVTELNEPLSNEER |        | +2         | 822.40     | 1642.79      | 1642.78 | 0.01     | 91      |
| YDDMAAMK       |        | +2         | 508.22     | 1014.42      | 1014.42 | 0        | 62      |
| VISSIEQK       |        | +2         | 451.37     | 900.73       | 902.51  | -1.77    | 65      |

No. 656. Protein IPI00231637 Matched (SEQUEST MASCOT) Y Y emPAI 0.15 Strategy.Hits 2 4 PepMatched(SEQUEST MASCOT) 6 7 SpectraMatched(SEQUEST MASCOT) 9  
 \*Des: Glucose-6-phosphate 1-dehydrogenase  
 SEQUEST:(PepMatched Observed.Hits Coverage) 4 4 12.42%  

| Seq               | Charge | Xcor | Delta | Proability | PepHits |
|-------------------|--------|------|-------|------------|---------|
| NSYVAGQYDDPASYK   |        | +2   | 4.332 | 0.561      | 1.0000  |
| DVAGDIFHQQCK      |        | +2   | 3.151 | 0.365      | 0.9977  |
| DLQSSNQLSNHISSLFR |        | +2   | 5.251 | 0.591      | 1.0000  |
| HLNSHMNALHQGMQANR |        | +3   | 3.865 | 0.549      | 1.0000  |

  
 MASCOT:(PepMatched Observed.Hits Coverage) 6 4 14.34%  

| Seq | Charge | ObservedMS | ExpectedMS | CalculatedMS |  | Pepscore | PepHits |
|-----|--------|------------|------------|--------------|--|----------|---------|
|-----|--------|------------|------------|--------------|--|----------|---------|

Identified Human Platelet Proteins

|                   |    |          |           |           |      |    |   |
|-------------------|----|----------|-----------|-----------|------|----|---|
| NSYVAGQYDDPASYK   | +2 | 839.3787 | 1676.7429 | 1676.7318 | 0.01 | 80 | 3 |
| VGFAQYEGTYK       | +2 | 596.2936 | 1190.5726 | 1190.5607 | 0.01 | 43 | 2 |
| DVAGDIFHQQCK      | +2 | 680.8220 | 1359.6295 | 1359.6241 | 0.01 | 52 | 1 |
| RNELVIR           | +2 | 450.2776 | 898.5407  | 898.5348  | 0.01 | 41 | 1 |
| DLQSSNQLSNHISSLFR | +2 | 973.4969 | 1944.9793 | 1944.9653 | 0.01 | 91 | 3 |
| IFGPIWNR          | +2 | 501.7821 | 1001.5496 | 1001.5446 | 0.01 | 46 | 1 |

|          |                                                                |                          |          |               |                            |                                |     |   |
|----------|----------------------------------------------------------------|--------------------------|----------|---------------|----------------------------|--------------------------------|-----|---|
| No. 657. | Protein                                                        | Matched (SEQUEST MASCOT) | emPAI    | Strategy.Hits | PepMatched(SEQUEST MASCOT) | SpectraMatched(SEQUEST MASCOT) |     |   |
|          | IPI00206634                                                    | Y Y                      | 1.69     | 3             | 2 4 7                      | 22                             |     |   |
| *Des:    | Platelet factor 4 precursor                                    |                          |          |               |                            |                                |     |   |
|          | SEQUEST:(PepMatched Observed.Hits Coverage)                    | 2                        | 3        | 18.69%        |                            |                                |     |   |
|          | Seq Charge Xcor Delta Probability PepHits                      |                          |          |               |                            |                                |     |   |
|          | AGPHCAVPQLIATLKNQSK                                            | +3                       | 4.497    | 0.374         | 0.9968                     | 4                              |     |   |
|          | AGPHCAVPQLIATLK                                                | +2                       | 4.571    | 0.469         | 1.0000                     | 8                              |     |   |
|          | MASCOT:(PepMatched Observed.Hits Coverage)                     | 4                        | 5        | 40.18%        |                            |                                |     |   |
|          | Seq Charge ObservedMS ExpectedMS CalculatedMS Pepscore PepHits |                          |          |               |                            |                                |     |   |
|          | ITSLEVIK                                                       | +2                       | 452.2513 | 902.4879      | 901.5484                   | 0.94                           | 50  | 7 |
|          | ASPEESDGDLSVCVK                                                | +2                       | 819.8592 | 1637.7038     | 1637.6912                  | 0.01                           | 103 | 6 |
|          | RITSLEVIK                                                      | +2                       | 529.8356 | 1057.6566     | 1057.6495                  | 0.01                           | 42  | 2 |
|          | AGPHCAVPQLIATLK                                                | +2                       | 759.9314 | 1517.8482     | 1517.8388                  | 0.01                           | 57  | 2 |

|          |                                             |                          |       |               |                            |                                |
|----------|---------------------------------------------|--------------------------|-------|---------------|----------------------------|--------------------------------|
| No. 658. | Protein                                     | Matched (SEQUEST MASCOT) | emPAI | Strategy.Hits | PepMatched(SEQUEST MASCOT) | SpectraMatched(SEQUEST MASCOT) |
|          | IPI00209976                                 | Y N                      | 1.32  | 1             | 2 0 3 0                    | 0                              |
| *Des:    | ATPase inhibitor, mitochondrial precursor   |                          |       |               |                            |                                |
|          | SEQUEST:(PepMatched Observed.Hits Coverage) | 2                        | 1     | 15.59%        |                            |                                |
|          | Seq Charge Xcor Delta Probability PepHits   |                          |       |               |                            |                                |
|          | HHEDEIDHHSKEIER                             | +3                       | 3.075 | 0.431         | 1.0000                     | 6                              |
|          | KHHEDEIDHHSKEIER                            | +3                       | 3.560 | 0.399         | 1.0000                     | 8                              |
|          | MASCOT:(PepMatched Observed.Hits Coverage)  |                          |       |               |                            |                                |

|          |                                                                |                          |        |               |                            |                                |     |    |
|----------|----------------------------------------------------------------|--------------------------|--------|---------------|----------------------------|--------------------------------|-----|----|
| No. 659. | Protein                                                        | Matched (SEQUEST MASCOT) | emPAI  | Strategy.Hits | PepMatched(SEQUEST MASCOT) | SpectraMatched(SEQUEST MASCOT) |     |    |
|          | IPI00230837                                                    | Y Y                      | 0.86   | 4             | 6 5 49                     | 24                             |     |    |
| *Des:    | 14-3-3 protein beta/alpha                                      |                          |        |               |                            |                                |     |    |
|          | SEQUEST:(PepMatched Observed.Hits Coverage)                    | 6                        | 6      | 40.4%         |                            |                                |     |    |
|          | Seq Charge Xcor Delta Probability PepHits                      |                          |        |               |                            |                                |     |    |
|          | TAFDEAIAELDTLNEESYK                                            | +2                       | 6.187  | 0.670         | 1.0000                     | 11                             |     |    |
|          | LGLALNFSVFYYEILNSPEK                                           | +2                       | 6.333  | 0.574         | 1.0000                     | 11                             |     |    |
|          | YLSEVASGDNK                                                    | +2                       | 3.642  | 0.409         | 0.9999                     | 5                              |     |    |
|          | YLILNATHAESK                                                   | +2                       | 4.171  | 0.381         | 0.9999                     | 23                             |     |    |
|          | AVTEQGHLSNEER                                                  | +2                       | 4.452  | 0.515         | 1.0000                     | 4                              |     |    |
|          | QTTVSNSQQAYQEAFEISK                                            | +3                       | 6.755  | 0.581         | 1.0000                     | 12                             |     |    |
|          | MASCOT:(PepMatched Observed.Hits Coverage)                     | 5                        | 7      | 32%           |                            |                                |     |    |
|          | Seq Charge ObservedMS ExpectedMS CalculatedMS Pepscore PepHits |                          |        |               |                            |                                |     |    |
|          | YLSEVASGDNK                                                    | +2                       | 591.79 | 1181.56       | 1181.56                    | 0                              | 66  | 4  |
|          | AVTEQGHLSNEER                                                  | +2                       | 799.88 | 1597.75       | 1597.73                    | 0.02                           | 117 | 4  |
|          | YLILNATHAESK                                                   | +2                       | 680.37 | 1358.73       | 1358.72                    | 0.01                           | 88  | 20 |
|          | QTTVSNSQQAYQEAFEISK                                            | +3                       | 720.35 | 2158.04       | 2158.02                    | 0.02                           | 70  | 2  |

Identified Human Platelet Proteins

TAFDEAIAELDTLNEESYK +3 720.34 2158.01 2158.00 0.01 69 7

| No.   | Protein                                     | Matched (SEQUEST MASCOT) | emPAI      | Strategy.Hits | PepMatched(SEQUEST MASCOT) | SpectraMatched(SEQUEST MASCOT) |
|-------|---------------------------------------------|--------------------------|------------|---------------|----------------------------|--------------------------------|
| 660.  | IPI00231639                                 | Y Y                      | 0.43       | 1             | 2 3 4                      | 9                              |
| *Des: | Glutathione S-transferase Mu 1              |                          |            |               |                            |                                |
|       | SEQUEST:(PepMatched Observed.Hits Coverage) |                          |            | 2             | 1                          | 13.51%                         |
|       | Seq                                         | Charge Xcor              | Delta      | Probility     | PepHits                    |                                |
|       | LGLDFPNLPYLIDGSR                            | +2                       | 3.412      | 0.492         | 0.9999                     | 1                              |
|       | ADIVENQVMDNR                                | +2                       | 3.539      | 0.389         | 0.9997                     | 4                              |
|       | MASCOT:(PepMatched Observed.Hits Coverage)  |                          |            | 3             | 1                          | 19.81%                         |
|       | Seq                                         | Charge ObservedMS        | ExpectedMS | CalculatedMS  |                            | Pepscore PepHits               |
|       | ADIVENQVMDNR                                | +2 702.34                | 1402.66    | 1402.65       | 0.01 70                    | 4                              |
|       | LLLEYTDSYEEK                                | +2 795.39                | 1588.76    | 1588.75       | 0.01 64                    | 4                              |
|       | LGLDFPNLPYLIDGSR                            | +2 895.49                | 1788.96    | 1788.94       | 0.02 59                    | 1                              |

| No.   | Protein                                     | Matched (SEQUEST MASCOT) | emPAI      | Strategy.Hits | PepMatched(SEQUEST MASCOT) | SpectraMatched(SEQUEST MASCOT) |
|-------|---------------------------------------------|--------------------------|------------|---------------|----------------------------|--------------------------------|
| 661.  | IPI00230838                                 | Y Y                      | 0.33       | 1             | 2 2 7                      | 7                              |
| *Des: | ATP synthase D chain, mitochondrial         |                          |            |               |                            |                                |
|       | SEQUEST:(PepMatched Observed.Hits Coverage) |                          |            | 2             | 3                          | 26.99%                         |
|       | Seq                                         | Charge Xcor              | Delta      | Probility     | PepHits                    |                                |
|       | IPVPEDKYTALVDAEEKEDVK                       | +3                       | 5.173      | 0.442         | 1.0000                     | 1                              |
|       | NMIPFDQMTIDDLNEVPETK                        | +2                       | 5.332      | 0.478         | 1.0000                     | 4                              |
|       | MASCOT:(PepMatched Observed.Hits Coverage)  |                          |            | 2             | 2                          | 26.99%                         |
|       | Seq                                         | Charge ObservedMS        | ExpectedMS | CalculatedMS  |                            | Pepscore PepHits               |
|       | IPVPEDKYTALVDAEEKEDVK                       | +2 1194.6329             | 2387.2513  | 2387.2107     | 0.04 76                    | 3                              |
|       | NMIPFDQMTIDDLNEVPETK                        | +2 1249.1077             | 2496.2008  | 2496.1552     | 0.05 87                    | 4                              |

| No.   | Protein                                       | Matched (SEQUEST MASCOT) | emPAI      | Strategy.Hits | PepMatched(SEQUEST MASCOT) | SpectraMatched(SEQUEST MASCOT) |
|-------|-----------------------------------------------|--------------------------|------------|---------------|----------------------------|--------------------------------|
| 662.  | IPI00231567                                   | N Y                      | 1.37       | 1             | 0 6 0                      | 104                            |
| *Des: | Splice Isoform 7 of Tropomyosin 1 alpha chain |                          |            |               |                            |                                |
|       | SEQUEST:(PepMatched Observed.Hits Coverage)   |                          |            | 6             | 2                          | 28.85%                         |
|       | MASCOT:(PepMatched Observed.Hits Coverage)    |                          |            | 6             | 2                          | 28.85%                         |
|       | Seq                                           | Charge ObservedMS        | ExpectedMS | CalculatedMS  |                            | Pepscore PepHits               |
|       | ETAADVASLNR                                   | +2 638.31                | 1274.61    | 1274.61       | 0 50                       | 12                             |
|       | SLQEQADAAEER                                  | +2 673.81                | 1345.62    | 1345.61       | 0.01 69                    | 6                              |
|       | YSQKEDKYEIEIK                                 | +2 844.91                | 1687.80    | 1687.79       | 0.01 65                    | 27                             |
|       | MEIQEIQLK                                     | +2 566.31                | 1130.60    | 1130.60       | 0 74                       | 20                             |
|       | IQLVEEELDR                                    | +2 622.33                | 1242.65    | 1242.65       | 0 77                       | 101                            |
|       | KLVIIESDLR                                    | +2 657.89                | 1313.76    | 1313.76       | 0 48                       | 5                              |

| No.   | Protein                                            | Matched (SEQUEST MASCOT) | emPAI | Strategy.Hits | PepMatched(SEQUEST MASCOT) | SpectraMatched(SEQUEST MASCOT) |
|-------|----------------------------------------------------|--------------------------|-------|---------------|----------------------------|--------------------------------|
| 663.  | IPI00212115                                        | Y Y                      | 0.27  | 1             | 2 2 3                      | 2                              |
| *Des: | Ubiquitin-activating enzyme E1-domain containing 1 |                          |       |               |                            |                                |
|       | SEQUEST:(PepMatched Observed.Hits Coverage)        |                          |       | 2             | 1                          | 6.09%                          |
|       | Seq                                                | Charge Xcor              | Delta | Probility     | PepHits                    |                                |
|       | MSDEVVDSNPYSR                                      | +2 3.552                 | 0.540 | 0.9999        | 2                          |                                |
|       | VEELEQELAR                                         | +2 3.282                 | 0.320 | 0.9984        | 1                          |                                |

**Identified Human Platelet Proteins**

|       |                                                  |                          |            |               |                            |                                |     |    |    |          |         |  |
|-------|--------------------------------------------------|--------------------------|------------|---------------|----------------------------|--------------------------------|-----|----|----|----------|---------|--|
|       | MASCOT:(PepMatched Observed.Hits Coverage)       | 2                        | 1          | 6.09%         |                            |                                |     |    |    |          |         |  |
|       | Seq                                              | Charge                   | ObservedMS | ExpectedMS    | CalculatedMS               |                                |     |    |    | PepScore | PepHits |  |
|       | MSDEVVDSNPYSR                                    | +2                       | 749.83     | 1497.65       | 1497.64                    | 0.01                           | 47  | 2  |    |          |         |  |
|       | VEELEQELAR                                       | +2                       | 608.31     | 1214.61       | 1214.61                    | 0                              | 55  | 1  |    |          |         |  |
| No.   | Protein                                          | Matched (SEQUEST MASCOT) | emPAI      | Strategy.Hits | PepMatched(SEQUEST MASCOT) | SpectraMatched(SEQUEST MASCOT) |     |    |    |          |         |  |
| 664.  | IPI00388301                                      | N                        | Y          | 0.21          | 1                          | 0                              | 4   | 0  | 34 |          |         |  |
| *Des: | 81 kDa protein                                   |                          |            |               |                            |                                |     |    |    |          |         |  |
|       | SEQUEST:(PepMatched Observed.Hits Coverage)      |                          |            |               |                            |                                |     |    |    |          |         |  |
|       | MASCOT:(PepMatched Observed.Hits Coverage)       | 4                        | 1          | 9.63%         |                            |                                |     |    |    |          |         |  |
|       | Seq                                              | Charge                   | ObservedMS | ExpectedMS    | CalculatedMS               |                                |     |    |    | PepScore | PepHits |  |
|       | IGDGGQEPTTGNWR                                   | +2                       | 744.3525   | 1486.6904     | 1486.6800                  | 0.01                           | 86  | 10 |    |          |         |  |
|       | LDLMDAGTDAMDVLMGR                                | +2                       | 912.9783   | 1823.9420     | 1822.8263                  | 1.12                           | 70  | 6  |    |          |         |  |
|       | SLLDDLLTESEDMAQR                                 | +2                       | 961.9588   | 1921.9030     | 1921.8939                  | 0.01                           | 83  | 12 |    |          |         |  |
|       | VFSPNVVNLTLVDLPGMTK                              | +2                       | 1022.5616  | 2043.1086     | 2043.1074                  | 0                              | 105 | 6  |    |          |         |  |
| No.   | Protein                                          | Matched (SEQUEST MASCOT) | emPAI      | Strategy.Hits | PepMatched(SEQUEST MASCOT) | SpectraMatched(SEQUEST MASCOT) |     |    |    |          |         |  |
| 665.  | IPI00360356                                      | Y                        | Y          | 0.17          | 1                          | 3                              | 2   | 29 | 6  |          |         |  |
| *Des: | PREDICTED: similar to RIKEN cDNA 4732495G21 gene |                          |            |               |                            |                                |     |    |    |          |         |  |
|       | SEQUEST:(PepMatched Observed.Hits Coverage)      | 3                        | 1          | 12.01%        |                            |                                |     |    |    |          |         |  |
|       | Seq                                              | Charge                   | Xcor       | Delta         | Probility                  | PepHits                        |     |    |    |          |         |  |
|       | VAPDEHPILLTEAPLNPKINR                            | +3                       | 3.638      | 0.391         | 0.9973                     | 2                              |     |    |    |          |         |  |
|       | HQGMVGMGQKDCYVGDEAQSQR                           | +3                       | 3.826      | 0.456         | 1.0000                     | 109                            |     |    |    |          |         |  |
|       | HQGMVGMGQKDCYVGDEAQSQR                           | +3                       | 3.267      | 0.527         | 1.0000                     | 25                             |     |    |    |          |         |  |
|       | MASCOT:(PepMatched Observed.Hits Coverage)       | 2                        | 1          | 6.26%         |                            |                                |     |    |    |          |         |  |
|       | Seq                                              | Charge                   | ObservedMS | ExpectedMS    | CalculatedMS               |                                |     |    |    | PepScore | PepHits |  |
|       | HQGMVGMGQKDCYVGDEAQSQR                           | +3                       | 841.7303   | 2522.1692     | 2522.1463                  | 0.02                           | 50  | 38 |    |          |         |  |
|       | HQGMVGMGQKDCYVGDEAQSQR                           | +3                       | 789.6961   | 2366.0665     | 2366.0452                  | 0.02                           | 44  | 15 |    |          |         |  |
| No.   | Protein                                          | Matched (SEQUEST MASCOT) | emPAI      | Strategy.Hits | PepMatched(SEQUEST MASCOT) | SpectraMatched(SEQUEST MASCOT) |     |    |    |          |         |  |
| 666.  | IPI00566258                                      | N                        | Y          | 0.39          | 4                          | 0                              | 7   | 0  | 38 |          |         |  |
| *Des: | PREDICTED: stomatin (predicted)                  |                          |            |               |                            |                                |     |    |    |          |         |  |
|       | SEQUEST:(PepMatched Observed.Hits Coverage)      |                          |            |               |                            |                                |     |    |    |          |         |  |
|       | MASCOT:(PepMatched Observed.Hits Coverage)       | 7                        | 10         | 12.01%        |                            |                                |     |    |    |          |         |  |
|       | Seq                                              | Charge                   | ObservedMS | ExpectedMS    | CalculatedMS               |                                |     |    |    | PepScore | PepHits |  |
|       | VIAAEGEMNASR                                     | +2                       | 624.31     | 1246.61       | 1246.60                    | 0.01                           | 84  | 9  |    |          |         |  |
|       | LPVQLQR+2                                        |                          | 427.27     | 852.52        | 852.52                     | 0                              | 56  | 10 |    |          |         |  |
|       | LLAQTTLR                                         | +2                       | 458.29     | 914.56        | 914.55                     | 0.01                           | 55  | 18 |    |          |         |  |
|       | YLQTLTTIAAEK                                     | +2                       | 676.38     | 1350.75       | 1350.74                    | 0.01                           | 70  | 3  |    |          |         |  |
|       | VQNATLAVANITNADSATR                              | +2                       | 965.51     | 1929.01       | 1928.99                    | 0.02                           | 131 | 4  |    |          |         |  |
|       | TISFDIPPQEVLTQ                                   | +2                       | 794.44     | 1586.87       | 1586.86                    | 0.01                           | 43  | 33 |    |          |         |  |
|       | EASMVITESPAALQLR                                 | +2                       | 858.46     | 1714.91       | 1714.89                    | 0.02                           | 80  | 4  |    |          |         |  |
| No.   | Protein                                          | Matched (SEQUEST MASCOT) | emPAI      | Strategy.Hits | PepMatched(SEQUEST MASCOT) | SpectraMatched(SEQUEST MASCOT) |     |    |    |          |         |  |
| 667.  | IPI00204899                                      | Y                        | Y          | 0.29          | 4                          | 5                              | 4   | 5  | 5  |          |         |  |
| *Des: | Septin-7                                         |                          |            |               |                            |                                |     |    |    |          |         |  |
|       | SEQUEST:(PepMatched Observed.Hits Coverage)      | 5                        | 4          | 18.01%        |                            |                                |     |    |    |          |         |  |

Identified Human Platelet Proteins

| Seq                                        | Charge | Xcor       | Delta      | Probability  | PepHits |         |          |         |   |
|--------------------------------------------|--------|------------|------------|--------------|---------|---------|----------|---------|---|
| LAAVTYNGVDNNK                              | +2     |            | 3.507      | 0.566        | 1.0000  | 1       |          |         |   |
| FEDYLNAESR                                 | +2     |            | 3.068      | 0.412        | 0.9944  | 3       |          |         |   |
| IYFEPETDDEEENKLVK                          | +2     |            | 4.489      | 0.556        | 1.0000  | 2       |          |         |   |
| STLINSFLTDLYSPEYPGPSHR                     |        |            |            | +3           | 4.599   | 0.554   | 1.0000   | 1       |   |
| DVTNNVHYENYR                               | +2     |            | 3.806      | 0.521        | 1.0000  | 1       |          |         |   |
| MASCOT:(PepMatched Observed.Hits Coverage) |        |            |            | 4            | 3       | 13.96%  |          |         |   |
| Seq                                        | Charge | ObservedMS | ExpectedMS | CalculatedMS |         |         | Pepscore | PepHits |   |
| LAAVTYNGVDNNK                              | +2     | 689.85     | 1377.69    | 1377.69      | 0       | 68      | 1        |         |   |
| DVTNNVHYENYR                               | +2     | 762.35     | 1522.69    | 1522.68      | 0.01    | 68      | 1        |         |   |
| FEDYLNAESR                                 | +2     | 622.82     | 1243.62    | 1242.55      | 1.07    | 53      | 6        |         |   |
| STLINSFLTDLYSPEYPGPSHR                     |        |            | +3         | 869.78       | 2606.32 | 2606.30 | 0.02     | 70      | 1 |

No. 668. Protein IPI00200757 Matched (SEQUEST MASCOT) Y Y emPAI Strategy.Hits 0.25 3 14 30 37 484  
 \*Des: Splice Isoform 1 of Fibronectin precursor

| Seq                                         | Charge | Xcor       | Delta      | Probability  | PepHits |       |          |         |  |
|---------------------------------------------|--------|------------|------------|--------------|---------|-------|----------|---------|--|
| SEQUEST:(PepMatched Observed.Hits Coverage) |        |            |            | 14           | 9       | 9.32% |          |         |  |
| SYTITGLQPGTDYK                              | +2     |            | 4.072      | 0.629        | 1.0000  | 2     |          |         |  |
| SSPVVIDASTAIDAPSNLR                         | +2     |            | 4.508      | 0.511        | 1.0000  | 4     |          |         |  |
| GLAFTDQVDVDSIK                              | +2     |            | 3.309      | 0.492        | 0.9996  | 1     |          |         |  |
| HVLQSASAGSGSFTDVR                           | +2     |            | 5.618      | 0.612        | 1.0000  | 9     |          |         |  |
| HYQINQQWER                                  | +2     |            | 2.573      | 0.421        | 0.9976  | 2     |          |         |  |
| NGESQPLVQTAVTNIDRPK                         | +3     |            | 3.204      | 0.422        | 0.9999  | 2     |          |         |  |
| TKTETITGFQVDAIPANGQTPVQR                    | +2     |            | 6.032      | 0.473        | 1.0000  | 5     |          |         |  |
| WLPSTSPVTGYR                                | +2     |            | 3.160      | 0.449        | 0.9993  | 2     |          |         |  |
| FTQVSPPTTLTAQWTAPSVK                        | +2     |            | 5.764      | 0.537        | 1.0000  | 4     |          |         |  |
| IGDQWDKQHDLGMMR                             | +3     |            | 5.162      | 0.469        | 1.0000  | 5     |          |         |  |
| LGVRPSQGGEAPR                               | +3     |            | 4.525      | 0.361        | 1.0000  | 12    |          |         |  |
| WSRPQAPITGYR                                | +3     |            | 3.288      | 0.302        | 0.9995  | 7     |          |         |  |
| FLTTTPNSLLVSWQAPR                           | +2     |            | 4.739      | 0.552        | 1.0000  | 6     |          |         |  |
| ITGYIIKYEKPGSPR                             | +3     |            | 3.164      | 0.486        | 1.0000  | 2     |          |         |  |
| MASCOT:(PepMatched Observed.Hits Coverage)  |        |            |            | 30           | 11      | 20%   |          |         |  |
| Seq                                         | Charge | ObservedMS | ExpectedMS | CalculatedMS |         |       | Pepscore | PepHits |  |
| QYNVGPMASK                                  | +2     | 547.77     | 1093.53    | 1093.52      | 0.01    | 45    | 8        |         |  |
| TYHVGQWQK                                   | +3     | 425.88     | 1274.61    | 1274.60      | 0.01    | 49    | 24       |         |  |
| HYQINQQWER                                  | +2     | 701.34     | 1400.67    | 1400.66      | 0.01    | 52    | 40       |         |  |
| HVLQSASAGSGSFTDVR                           | +2     | 859.93     | 1717.85    | 1717.84      | 0.01    | 133   | 59       |         |  |
| RPGAAEPSDGTGHTYNQYTQR                       | +3     |            | 835.40     | 2503.17      | 2503.15 | 0.02  | 67       | 4       |  |
| GVTYNIIVEALHNQR                             | +2     | 863.97     | 1725.93    | 1725.92      | 0.01    | 79    | 29       |         |  |
| VTWAPPPSIELTNLLVR                           | +2     |            | 953.55     | 1905.09      | 1905.07 | 0.02  | 61       | 52      |  |
| FLTTTPNSLLVSWQAPR                           | +2     |            | 966.03     | 1930.05      | 1930.03 | 0.02  | 89       | 16      |  |
| NTFAEVTGLSPGVTYLTK                          | +2     |            | 972.52     | 1943.02      | 1943.00 | 0.02  | 114      | 32      |  |
| EINLSPDSTSVIVSGLMVATK                       | +3     |            | 721.06     | 2160.15      | 2160.13 | 0.02  | 57       | 8       |  |
| NSITLTNLNPGTEYIVTIIAVNGR                    | +3     |            | 858.47     | 2572.40      | 2572.39 | 0.01  | 71       | 32      |  |
| DLEVIASPTSLISWEPPAVSVR                      | +3     |            | 860.81     | 2579.41      | 2579.38 | 0.03  | 69       | 20      |  |
| WSRPQAPITGYR                                | +2     | 716.38     | 1430.75    | 1430.74      | 0.01    | 44    | 47       |         |  |

Identified Human Platelet Proteins

|                             |    |        |         |         |         |      |     |    |  |
|-----------------------------|----|--------|---------|---------|---------|------|-----|----|--|
| IAWESPQQQVSR                | +2 | 679.35 | 1356.69 | 1356.68 | 0.01    | 62   | 6   |    |  |
| EATIPGHLNSYTIK              | +2 | 772.42 | 1542.82 | 1542.80 | 0.02    | 52   | 47  |    |  |
| IHLYTLNDNAR                 | +2 | 665.35 | 1328.69 | 1328.68 | 0.01    | 72   | 44  |    |  |
| EESPPLIGQQSTVSDVPR          | +2 | 970.00 | 1937.99 | 1937.97 | 0.02    | 107  | 158 |    |  |
| SYTITGLQPGETDYK             | +2 | 772.39 | 1542.77 | 1542.76 | 0.01    | 77   | 45  |    |  |
| APITGYIIR                   | +2 | 502.30 | 1002.59 | 1002.59 | 0       | 60   | 21  |    |  |
| VDVLPVNLPGHEHGQR            | +2 | 815.45 | 1628.88 | 1628.86 | 0.02    | 52   | 25  |    |  |
| SSPVVIDASTAIDAPSNLR         | +2 | 957.01 | 1912.00 | 1911.99 | 0.01    | 113  | 12  |    |  |
| TVLVTWTPPR                  | +2 | 585.35 | 1168.68 | 1168.66 | 0.02    | 57   | 27  |    |  |
| ATGVFTTLQPLR                | +2 | 652.38 | 1302.74 | 1302.73 | 0.01    | 63   | 6   |    |  |
| TFYQIGDSWEK                 | +2 | 687.33 | 1372.64 | 1372.63 | 0.01    | 59   | 3   |    |  |
| YIVNVYQISEEGK               | +2 | 771.40 | 1540.79 | 1540.78 | 0.01    | 90   | 9   |    |  |
| VTDATETTITISWR              | +2 | 797.42 | 1592.82 | 1592.80 | 0.02    | 62   | 3   |    |  |
| NLQPGSEYTVTLMAVK            | +2 | 875.96 | 1749.91 | 1749.90 | 0.01    | 74   | 12  |    |  |
| VTIMWTPPNSAVTGYR            | +2 | 896.96 | 1791.91 | 1791.90 | 0.01    | 62   | 9   |    |  |
| GLTPGVIIYEGQLISIQQYGHQEVTR  | +3 |        | 929.50  | 2785.46 | 2785.44 | 0.02 | 49  | 10 |  |
| TGLDSPTGFDSSDVTANSFTVHWVAPR | +3 |        | 955.46  | 2863.36 | 2863.34 | 0.02 | 76  | 6  |  |

No. 669. Protein IPI00391244 Matched (SEQUEST MASCOT) Y Y emPAI Strategy.Hits 0.75 4 PepMatched(SEQUEST MASCOT) 12 13 SpectraMatched(SEQUEST MASCOT) 102 104

\*Des: PREDICTED: similar to beta-parvin

| Seq                                                     | Charge | Xcor       | Delta      | Probability  | PepHits |      |          |         |  |
|---------------------------------------------------------|--------|------------|------------|--------------|---------|------|----------|---------|--|
| SEQUEST:(PepMatched Observed.Hits Coverage) 12 13 35.7% |        |            |            |              |         |      |          |         |  |
| WNVDSIHGK                                               | +2     |            | 3.120      | 0.283        | 0.9968  | 24   |          |         |  |
| LNVAEVTQSEIGQK                                          | +2     |            | 5.274      | 0.535        | 1.0000  | 16   |          |         |  |
| ARPEDVVNLDLK                                            | +2     |            | 4.059      | 0.401        | 0.9997  | 13   |          |         |  |
| QLEEDLYDGQVLQK+2                                        |        |            | 5.114      | 0.445        | 1.0000  | 9    |          |         |  |
| APIHLPEHVTVQVVVVR                                       | +3     |            | 6.054      | 0.532        | 1.0000  | 20   |          |         |  |
| SAINSPMAPALVDIHPEDTQLEENEER                             | +3     |            | 4.021      | 0.394        | 0.9996  | 5    |          |         |  |
| DAFDTLFDHAPDK                                           | +2     | 4.371      | 0.496      | 1.0000       | 12      |      |          |         |  |
| DAFDTLFDHAPDKLNLVK                                      | +2     |            | 4.572      | 0.509        | 1.0000  | 23   |          |         |  |
| EGLLHSSHISEELTTTTEIMMGR                                 | +2     |            | 5.774      | 0.669        | 1.0000  | 35   |          |         |  |
| VHNVAFAFELMLDGGLK                                       | +2     |            | 5.351      | 0.715        | 1.0000  | 11   |          |         |  |
| VLLDWINDVLAER                                           | +2     | 5.372      | 0.389      | 1.0000       | 10      |      |          |         |  |
| LQTVLEAVQDLLRPHGWPLR                                    | +3     |            | 4.628      | 0.555        | 1.0000  | 6    |          |         |  |
| MASCOT:(PepMatched Observed.Hits Coverage) 13 11 33.87% |        |            |            |              |         |      |          |         |  |
| Seq                                                     | Charge | ObservedMS | ExpectedMS | CalculatedMS |         |      | Pepscore | PepHits |  |
| WNVDSIHGK                                               | +2     | 528.27     | 1054.53    | 1054.52      | 0.01    | 56   |          | 19      |  |
| SLITFVNK+2                                              |        | 461.28     | 920.53     | 0.01         | 55      | 7    |          |         |  |
| ARPEDVVNLDLK                                            | +2     | 684.88     | 1367.75    | 1367.74      | 0.01    | 85   |          | 14      |  |
| LNVAEVTQSEIGQK                                          | +2     | 758.41     | 1514.81    | 1514.79      | 0.02    | 120  |          | 20      |  |
| QLEEDLYDGQVLQK+2                                        |        | 839.43     | 1676.84    | 1676.83      | 0.01    | 114  |          | 9       |  |
| APIHLPEHVTVQVVVVR                                       | +2     | 947.07     | 1892.12    | 1892.10      | 0.02    | 80   |          | 15      |  |
| VLYTLFTK                                                | +2     | 492.79     | 983.58     | 983.57       | 0.01    | 43   |          | 2       |  |
| DAFDTLFDHAPDK                                           | +2     | 746.35     | 1490.68    | 1490.67      | 0.01    | 84   |          | 22      |  |
| DAFDTLFDHAPDKLNLVK                                      | +3     | 687.03     | 2058.06    | 2058.04      | 0.02    | 69   |          | 18      |  |
| EGLLHSSHISEELTTTTEIMMGR                                 | +3     |            | 858.09     | 2571.25      | 2571.23 | 0.02 | 86       | 19      |  |

Identified Human Platelet Proteins

|                         |        |         |         |         |      |     |    |
|-------------------------|--------|---------|---------|---------|------|-----|----|
| VLLDWINDVLAER +2        | 842.96 | 1683.90 | 1683.88 | 0.02    | 112  | 11  |    |
| VHNVAFAFELMLDGLK +2     |        | 930.99  | 1859.97 | 1859.96 | 0.01 | 121 | 10 |
| LQTVLEAVQDLLRPHGWPLR +3 |        | 781.11  | 2340.31 | 2340.31 | 0    | 60  | 3  |

|          |                                                              |                              |            |                 |                              |                                  |          |         |    |   |
|----------|--------------------------------------------------------------|------------------------------|------------|-----------------|------------------------------|----------------------------------|----------|---------|----|---|
| No. 670. | Protein IPI00201489                                          | Matched (SEQUEST MASCOT) Y Y | emPAI 1.37 | Strategy.Hits 1 | PepMatched(SEQUEST MASCOT) 5 | SpectraMatched(SEQUEST MASCOT) 5 | 9        | 8       |    |   |
| *Des:    | Peptidyl-prolyl cis-trans isomerase, mitochondrial precursor |                              |            |                 |                              |                                  |          |         |    |   |
|          | SEQUEST:(PepMatched Observed.Hits Coverage)                  |                              |            |                 | 5                            | 2                                | 36.66%   |         |    |   |
|          | Seq                                                          | Charge                       | Xcor       | Delta           | Proability                   | PepHits                          |          |         |    |   |
|          | VVLELKADVVPK                                                 | +3                           |            | 2.313           | 0.615                        | 0.9980                           | 4        |         |    |   |
|          | TDWLDGKHVVFGHVK                                              |                              | +3         |                 | 3.300                        | 0.547                            | 0.9982   | 2       |    |   |
|          | TDWLDGKHVVFGHVKEGMDVVK                                       |                              | +3         |                 | 4.409                        | 0.625                            | 0.9997   | 2       |    |   |
|          | SIYGSRFPDENFTLK+3                                            |                              |            | 1.984           | 0.574                        | 0.9904                           | 4        |         |    |   |
|          | GANSSSQNPLVYLDVGADGQPLGR                                     |                              | +2         |                 | 5.298                        | 0.644                            | 1.0000   | 3       |    |   |
|          | MASCOT:(PepMatched Observed.Hits Coverage)                   |                              |            |                 | 5                            | 2                                | 24.76%   |         |    |   |
|          | Seq                                                          | Charge                       | ObservedMS | ExpectedMS      | CalculatedMS                 |                                  | Pepscore | PepHits |    |   |
|          | FPDENFTLK                                                    | +2                           | 555.78     | 1109.54         | 1109.54                      | 0                                | 42       | 3       |    |   |
|          | VVLELKADVVPK                                                 | +2                           | 655.41     | 1308.80         | 1308.80                      | 0                                | 73       | 6       |    |   |
|          | TDWLDGKHVVFGHVK                                              | +2                           | 869.46     | 1736.90         | 1736.90                      | 0                                | 49       | 2       |    |   |
|          | SIYGSRFPDENFTLK+2                                            |                              | 887.44     | 1772.87         | 1772.87                      | 0                                | 67       | 3       |    |   |
|          | TDWLDGKHVVFGHVKEGMDVVK                                       |                              | +3         |                 | 832.77                       | 2495.28                          | 2495.26  | 0.02    | 47 | 1 |

|          |                                             |                              |            |                 |                              |                                  |          |         |  |
|----------|---------------------------------------------|------------------------------|------------|-----------------|------------------------------|----------------------------------|----------|---------|--|
| No. 671. | Protein IPI00421897                         | Matched (SEQUEST MASCOT) N Y | emPAI 0.19 | Strategy.Hits 1 | PepMatched(SEQUEST MASCOT) 0 | SpectraMatched(SEQUEST MASCOT) 3 | 0        | 65      |  |
| *Des:    | Ras-related protein Rab-1A                  |                              |            |                 |                              |                                  |          |         |  |
|          | SEQUEST:(PepMatched Observed.Hits Coverage) |                              |            |                 | 3                            | 1                                | 22.48%   |         |  |
|          | MASCOT:(PepMatched Observed.Hits Coverage)  |                              |            |                 | 3                            | 1                                | 22.48%   |         |  |
|          | Seq                                         | Charge                       | ObservedMS | ExpectedMS      | CalculatedMS                 |                                  | Pepscore | PepHits |  |
|          | NATNVEQSFMTMAAEIK                           | +2                           | 942.9573   | 1883.9001       | 1883.8757                    | 0.02                             | 120      | 12      |  |
|          | QWLQEIDRYASENVNK                            | +2                           | 997.0054   | 1991.9962       | 1991.9700                    | 0.03                             | 69       | 8       |  |
|          | LQIWDTAGQER                                 | +2                           | 658.8421   | 1315.6697       | 1315.6520                    | 0.02                             | 65       | 63      |  |

|          |                                             |                              |            |                 |                               |                                   |       |     |  |
|----------|---------------------------------------------|------------------------------|------------|-----------------|-------------------------------|-----------------------------------|-------|-----|--|
| No. 672. | Protein IPI00209113                         | Matched (SEQUEST MASCOT) Y Y | emPAI 1.72 | Strategy.Hits 5 | PepMatched(SEQUEST MASCOT) 88 | SpectraMatched(SEQUEST MASCOT) 87 | 377   | 585 |  |
| *Des:    | Myosin heavy chain, nonmuscle type A        |                              |            |                 |                               |                                   |       |     |  |
|          | SEQUEST:(PepMatched Observed.Hits Coverage) |                              |            |                 | 88                            | 22                                | 51.8% |     |  |
|          | Seq                                         | Charge                       | Xcor       | Delta           | Proability                    | PepHits                           |       |     |  |
|          | NTDQASMPDNTAAQK                             | +2                           |            | 5.621           | 0.427                         | 1.0000                            | 12    |     |  |
|          | NAEQFKDQADKASTR                             | +2                           |            | 4.916           | 0.598                         | 1.0000                            | 5     |     |  |
|          | QLEEAEEEEAQR                                | +2                           |            | 3.717           | 0.389                         | 0.9995                            | 3     |     |  |
|          | ELEDATETADAMNR                              | +2                           |            | 4.646           | 0.577                         | 1.0000                            | 4     |     |  |
|          | ASIAALEAK                                   | +2                           |            | 3.284           | 0.343                         | 0.9987                            | 4     |     |  |
|          | KVEAQLQELQVK                                | +2                           |            | 4.813           | 0.392                         | 1.0000                            | 10    |     |  |
|          | IAQLEEQLDNETK                               | +2                           |            | 4.606           | 0.563                         | 1.0000                            | 3     |     |  |
|          | TEMEDLMSSKDDVGK                             | +2                           |            | 4.506           | 0.559                         | 1.0000                            | 6     |     |  |
|          | ALELDSNLYR                                  | +2                           |            | 3.605           | 0.444                         | 0.9998                            | 8     |     |  |
|          | YEILTPNSIPK                                 | +2                           |            | 2.780           | 0.438                         | 0.9981                            | 5     |     |  |

Identified Human Platelet Proteins

|                                |    |       |       |        |    |  |  |  |
|--------------------------------|----|-------|-------|--------|----|--|--|--|
| TDLLEPYNK                      | +2 | 3.958 | 0.471 | 1.0000 | 6  |  |  |  |
| KANLQIDQINTDLNLER              | +2 | 6.292 | 0.553 | 1.0000 | 5  |  |  |  |
| LTEMETMQSQLMAEK                | +2 | 5.686 | 0.473 | 1.0000 | 8  |  |  |  |
| MQQNIQELEEQLLEEEESAR           | +2 | 6.231 | 0.608 | 1.0000 | 6  |  |  |  |
| LQVELDSVTGLLNQSDSK             | +2 | 4.974 | 0.503 | 1.0000 | 19 |  |  |  |
| NLPIYSEEIVDMYK                 | +2 | 4.608 | 0.551 | 1.0000 | 11 |  |  |  |
| ITDVIIGFQACCR                  | +2 | 2.863 | 0.244 | 0.9741 | 2  |  |  |  |
| DFSALESQLQDTQELLQEENRQK        | +3 | 5.411 | 0.606 | 1.0000 | 8  |  |  |  |
| IIGLDQVAGMSETALPGAFK           | +2 | 5.908 | 0.576 | 1.0000 | 13 |  |  |  |
| LQQELDDLLVDLDHQR               | +2 | 5.926 | 0.517 | 1.0000 | 13 |  |  |  |
| DFSALESQLQDTQELLQEENR          | +3 | 6.507 | 0.552 | 1.0000 | 5  |  |  |  |
| QLLQANPILEAFGNAK               | +3 | 5.246 | 0.498 | 1.0000 | 30 |  |  |  |
| SMEAEMIQLQEELAAAER             | +2 | 6.433 | 0.489 | 1.0000 | 20 |  |  |  |
| KGTGDCSDEEVDGKADGADAK          | +3 | 5.241 | 0.406 | 1.0000 | 4  |  |  |  |
| NAEQFKDQADK                    | +2 | 4.054 | 0.295 | 0.9945 | 5  |  |  |  |
| HEDELLAK                       | +2 | 3.355 | 0.462 | 1.0000 | 4  |  |  |  |
| ALEEAMEQK                      | +2 | 3.399 | 0.139 | 0.9812 | 5  |  |  |  |
| EMEALEDERK                     | +2 | 3.772 | 0.330 | 0.9989 | 2  |  |  |  |
| VEEEEERCQYLQAEK                | +3 | 3.080 | 0.372 | 0.9995 | 2  |  |  |  |
| ALEQQVEEMK                     | +2 | 3.479 | 0.510 | 1.0000 | 2  |  |  |  |
| ALEEAMEQKAELER                 | +2 | 5.121 | 0.509 | 1.0000 | 9  |  |  |  |
| KLEEDQIIMEDQNCK                | +2 | 5.780 | 0.587 | 1.0000 | 4  |  |  |  |
| KMEDGVGCLETAEEAK               | +2 | 4.467 | 0.485 | 1.0000 | 3  |  |  |  |
| IAQLEEQLDNETKER                | +2 | 4.882 | 0.484 | 1.0000 | 5  |  |  |  |
| MEDGVGCLETAEEAKR               | +2 | 4.572 | 0.462 | 1.0000 | 3  |  |  |  |
| VAEFTTDLMEEEEKSK               | +2 | 4.569 | 0.467 | 1.0000 | 2  |  |  |  |
| VAEFTTDLMEEEEK                 | +2 | 4.451 | 0.454 | 1.0000 | 1  |  |  |  |
| ELEDATETADAMNREVSSLK           | +2 | 4.043 | 0.517 | 1.0000 | 1  |  |  |  |
| ELETQISELQEDLESER              | +2 | 3.395 | 0.506 | 0.9997 | 1  |  |  |  |
| LKSMEAEMIQLQEELAAAER           | +3 | 3.695 | 0.462 | 1.0000 | 1  |  |  |  |
| ALEQQVEEMKTQLEEELEDELQATEDAKLR | +4 | 6.864 | 0.556 | 1.0000 | 4  |  |  |  |
| ALEQQVEEMKTQLEEELEDELQATEDAK   | +3 | 4.799 | 0.412 | 1.0000 | 2  |  |  |  |
| NMDPLNDNIATLLHQSSDKFVSELWK     | +3 | 4.143 | 0.418 | 0.9999 | 2  |  |  |  |
| PAGPPGILALLDEECWFPK            | +2 | 4.507 | 0.515 | 1.0000 | 3  |  |  |  |
| SHAQKNENAR                     | +2 | 3.253 | 0.467 | 0.9986 | 1  |  |  |  |
| VVQEQQGTHPK                    | +2 | 3.481 | 0.362 | 0.9991 | 18 |  |  |  |
| VKVNKDDIQK                     | +2 | 3.331 | 0.293 | 0.9860 | 5  |  |  |  |
| ATDKSFVEK                      | +2 | 2.841 | 0.321 | 0.9805 | 3  |  |  |  |
| RQLEEAEFEAQR                   | +2 | 4.346 | 0.311 | 0.9992 | 2  |  |  |  |
| THEAQIQEMR                     | +2 | 3.293 | 0.382 | 0.9990 | 3  |  |  |  |
| RQLEEAEFEAQRANASR              | +3 | 3.881 | 0.348 | 0.9997 | 1  |  |  |  |
| DLEAHIDTANKNREEAIK             | +3 | 3.970 | 0.469 | 1.0000 | 1  |  |  |  |
| AKQTLENERGELANEVK              | +2 | 5.258 | 0.493 | 1.0000 | 3  |  |  |  |
| LKNKHEAMITDLEER                | +3 | 5.210 | 0.556 | 1.0000 | 10 |  |  |  |
| KTLEDEAKTHEAQIQEMR             | +3 | 4.317 | 0.482 | 1.0000 | 4  |  |  |  |
| LKKLEEDQIIMEDQNCK              | +3 | 3.248 | 0.455 | 1.0000 | 1  |  |  |  |
| ALEEAMEQKAELERLNK              | +3 | 3.179 | 0.258 | 0.9899 | 1  |  |  |  |



Identified Human Platelet Proteins

|                                            |        |            |                     |              |    |  |                  |
|--------------------------------------------|--------|------------|---------------------|--------------|----|--|------------------|
| LQKDLEGLSQRLEEK                            | +2     | 3.631      | 0.374               | 0.9933       | 3  |  |                  |
| LEVNLQAMK                                  | +2     | 3.024      | 0.323               | 0.9971       | 4  |  |                  |
| TEMEDLMSSKDDVVGKSVHELEK                    | +3     | 4.709      | 0.573               | 1.0000       | 2  |  | 2                |
| HSQAVEELAEQLEQTKR                          | +3     | 6.292      | 0.616               | 1.0000       | 2  |  |                  |
| QFRTEMEDLMSSKDDVVGK                        | +3     | 4.133      | 0.360               | 0.9999       | 2  |  |                  |
| HSQAVEELAEQLEQTK                           | +2     | 5.258      | 0.592               | 1.0000       | 2  |  |                  |
| KQELEEICHDLER                              | +2     | 4.572      | 0.486               | 1.0000       | 3  |  |                  |
| MQQNIQELEEQLSEESARQK                       | +3     | 3.965      | 0.381               | 0.9998       | 1  |  |                  |
| KMQQNIQELEEQLSEESAR                        | +3     | 3.646      | 0.409               | 1.0000       | 1  |  |                  |
| FLSNGHVTIPGQQDKDMFQETMEAMR                 | +3     | 6.257      | 0.494               | 1.0000       | 12 |  |                  |
| IMGIPEDQMGLLR                              | +2     | 3.747      | 0.532               | 1.0000       | 6  |  |                  |
| LTKDFSALSQLQDTQELLQEENRQK                  | +3     | 5.149      | 0.534               | 1.0000       | 2  |  |                  |
| NGFEPASLKEEVGEEAIVELVENGKK                 | +3     | 5.941      | 0.496               | 1.0000       | 7  |  |                  |
| IRELETQISELQEDLESER                        | +3     | 3.926      | 0.421               | 1.0000       | 1  |  |                  |
| LTKDFSALSQLQDTQELLQEENR                    | +3     | 6.067      | 0.429               | 1.0000       | 1  |  |                  |
| LLEDVVAEFTTDLMEEEESK                       | +3     | 6.014      | 0.582               | 1.0000       | 1  |  |                  |
| ALLQGKGDSEHK                               | +3     | 2.408      | 0.371               | 0.9982       | 21 |  |                  |
| VRTELADKVSK                                | +3     | 3.959      | 0.371               | 1.0000       | 11 |  |                  |
| RQQQLTAMK                                  | +2     | 2.773      | 0.294               | 0.9926       | 9  |  |                  |
| TVGQLYKEQLAK                               | +2     | 4.445      | 0.488               | 1.0000       | 7  |  |                  |
| QIATLHAQVTDMMK                             | +2     | 4.030      | 0.555               | 1.0000       | 5  |  |                  |
| KKVEAQLQELQVK                              | +2     | 5.399      | 0.398               | 1.0000       | 12 |  |                  |
| HEMPPHIYAITDTAYR                           | +3     | 3.905      | 0.545               | 1.0000       | 1  |  |                  |
| QRYEILTPNSIPK                              | +3     | 3.301      | 0.342               | 0.9995       | 11 |  |                  |
| VSHLLGINVTDFTFR                            | +2     | 4.191      | 0.539               | 1.0000       | 27 |  |                  |
| VISGVLQLGNIVFK                             | +2     | 4.977      | 0.558               | 1.0000       | 29 |  |                  |
| RGDMPFVTR                                  | +2     | 2.750      | 0.344               | 0.9952       | 4  |  |                  |
| LRLEVNLQAMK                                | +3     | 3.146      | 0.284               | 0.9978       | 12 |  |                  |
| ALLQGKGDSEHKKR                             | +2     | 3.735      | 0.502               | 1.0000       | 33 |  |                  |
| QIATLHAQVTDMMK                             | +2     | 3.353      | 0.495               | 0.9996       | 9  |  |                  |
| VISGVLQLGNIVFKK                            | +2     | 3.961      | 0.484               | 0.9998       | 16 |  |                  |
| MASCOT:(PepMatched Observed.Hits Coverage) |        | 87         | 27                  | 41.72%       |    |  |                  |
| Seq                                        | Charge | ObservedMS | ExpectedMS          | CalculatedMS |    |  | Pepscore PepHits |
| VNKDDIQK                                   | +2     | 480.2646   | 958.5146 958.5083   | 0.01 51      |    |  | 8                |
| NAEQFKDQADK                                | +2     | 647.3132   | 1292.6119 1292.5997 | 0.01 84      |    |  | 6                |
| ERNTDQASMPDNTAAQK                          | +3     | 626.2908   | 1875.8507 1875.8381 | 0.01 41      |    |  | 3                |
| HEDELLAK                                   | +2     | 477.7512   | 953.4879 953.4818   | 0.01 61      |    |  | 3                |
| LQEMESAVK                                  | +2     | 517.7664   | 1033.5182 1033.5114 | 0.01 43      |    |  | 12               |
| ALEEAMEQK                                  | +2     | 524.7562   | 1047.4979 1047.4906 | 0.01 56      |    |  | 8                |
| EMEALEDERK                                 | +2     | 689.8168   | 1377.6191 1377.6082 | 0.01 80      |    |  | 4                |
| VEEEERCQYLQAEK                             | +2     | 941.9379   | 1881.8613 1881.8414 | 0.02 64      |    |  | 4                |
| ELEDATETADAMNR                             | +2     | 783.3481   | 1564.6817 1564.6675 | 0.01 92      |    |  | 8                |
| ASIAALEAK                                  | +2     | 437.2586   | 872.5026 872.4967   | 0.01 63      |    |  | 5                |
| ALEQQVEEMK                                 | +2     | 602.8041   | 1203.5936 1203.5805 | 0.01 54      |    |  | 4                |
| ALEEAMEQKAELER                             | +2     | 823.9133   | 1645.8120 1645.7981 | 0.01 103     |    |  | 12               |
| VEAQLQELQVK                                | +2     | 642.8647   | 1283.7148 1283.7085 | 0.01 48      |    |  | 2                |
| DVLLQVEDERR                                | +2     | 686.3711   | 1370.7276 1370.7153 | 0.01 46      |    |  | 7                |

Identified Human Platelet Proteins

|                    |          |          |           |           |       |     |    |
|--------------------|----------|----------|-----------|-----------|-------|-----|----|
| MEDGVGCLETAEEAK    | +2       | 791.3479 | 1580.6812 | 1580.6698 | 0.01  | 69  | 3  |
| TEMEDLMSSKDDVGK    | +2       | 842.8801 | 1683.7457 | 1683.7331 | 0.01  | 84  | 11 |
| KMEDGVGCLETAEEAK   | +2       | 855.3995 | 1708.7844 | 1708.7647 | 0.02  | 86  | 6  |
| MEDGVGCLETAEEAKR   | +2       | 869.3965 | 1736.7784 | 1736.7709 | 0.01  | 110 | 10 |
| KLEEDQIIMEDQNCK    | +2       | 918.4368 | 1834.8591 | 1834.8441 | 0.01  | 112 | 10 |
| VVFQEFR +2         | 462.7528 | 923.4910 | 923.4864  | 0         | 41    | 7   |    |
| ALELDSNLYR         | +2       | 597.3155 | 1192.6164 | 1192.6088 | 0.01  | 78  | 13 |
| TDLLLEPYNK         | +2       | 603.3282 | 1204.6419 | 1204.6339 | 0.01  | 76  | 8  |
| DLEGLSQRLEEK       | +2       | 708.8754 | 1415.7362 | 1415.7256 | 0.01  | 46  | 6  |
| VAEFTTDLMEEEEK     | +2       | 835.3928 | 1668.7711 | 1669.7392 | -0.96 | 74  | 2  |
| VAEFTTDLMEEEEKSK   | +2       | 942.9545 | 1883.8945 | 1884.8662 | -0.96 | 84  | 5  |
| ADEWLMK            | +2       | 446.7184 | 891.4223  | 891.4160  | 0.01  | 44  | 7  |
| EQADFAIEALAK       | +2       | 653.3419 | 1304.6693 | 1304.6612 | 0.01  | 69  | 19 |
| LTEMETMQSQLMAEK    | +2       | 885.4158 | 1768.8171 | 1768.8045 | 0.01  | 116 | 14 |
| ANLQIDQINTDLNLER   | +2       | 935.4924 | 1868.9702 | 1868.9592 | 0.01  | 117 | 11 |
| LQVELDSVTGLLNQSDSK | +2       | 973.5149 | 1945.0152 | 1945.0004 | 0.01  | 139 | 32 |
| NLPIYSEEIVDMYK     | +2       | 857.4308 | 1712.8471 | 1712.8331 | 0.01  | 96  | 16 |
| LQQELDDLLVDLDHQR   | +2       | 975.5079 | 1949.0013 | 1948.9854 | 0.02  | 127 | 23 |
| GALALEEK           | +2       | 494.7636 | 987.5127  | 985.5556  | 1.96  | 52  | 4  |
| ASREEILAQAK        | +2       | 608.3420 | 1214.6694 | 1214.6619 | 0.01  | 56  | 3  |
| QLEEAEEEAQR        | +2       | 666.3126 | 1330.6107 | 1330.6000 | 0.01  | 76  | 5  |
| LEVNLQAMK          | +2       | 523.2928 | 1044.5710 | 1044.5637 | 0.01  | 47  | 6  |
| YEILTPNSIPK        | +2       | 637.8576 | 1273.7007 | 1273.6918 | 0.01  | 53  | 3  |
| KANLQIDQINTDLNLER  | +2       | 999.5437 | 1997.0729 | 1997.0541 | 0.02  | 120 | 4  |
| QLEEAEEEAQRANASR   | +3       | 610.9622 | 1829.8648 | 1829.8503 | 0.01  | 46  | 6  |
| IAQLEEQLDNETK      | +2       | 765.8928 | 1529.7711 | 1529.7573 | 0.01  | 75  | 6  |
| VVQEQGTHPK         | +2       | 560.8441 | 1119.6736 | 1121.5829 | -1.9  | 62  | 16 |
| YKASIAALEAK        | +2       | 582.8396 | 1163.6646 | 1163.6550 | 0.01  | 45  | 4  |
| KFDQLLAEEK         | +2       | 610.8358 | 1219.6570 | 1219.6448 | 0.01  | 47  | 1  |
| QTLENERGELANEVK    | +2       | 865.4470 | 1728.8794 | 1728.8642 | 0.02  | 56  | 2  |
| KVEAQLQELQVK       | +2       | 706.9152 | 1411.8158 | 1411.8034 | 0.01  | 86  | 9  |
| NKHEAMITDLEER      | +3       | 529.2632 | 1584.7679 | 1584.7566 | 0.01  | 74  | 5  |
| IAQLEEQLDNETKER    | +2       | 908.4672 | 1814.9199 | 1814.9010 | 0.02  | 90  | 14 |
| LKDVLLQVEDERR      | +3       | 538.3088 | 1611.9045 | 1611.8944 | 0.01  | 49  | 2  |
| LQKDLEGLSQRLEEK    | +2       | 893.4967 | 1784.9789 | 1784.9632 | 0.02  | 66  | 2  |
| KQELEEICHDLER      | +2       | 856.9293 | 1711.8441 | 1711.8199 | 0.02  | 107 | 3  |
| HSQAVEELAEQLEQTK   | +2       | 920.4673 | 1838.9200 | 1838.9010 | 0.02  | 113 | 3  |
| HSQAVEELAEQLEQTKR  | +3       | 666.0126 | 1995.0159 | 1995.0021 | 0.01  | 71  | 3  |
| IMGIPEDQMGLLR      | +2       | 801.4113 | 1600.8081 | 1600.7952 | 0.01  | 60  | 6  |
| EKHLAAENR          | +2       | 534.2875 | 1066.5605 | 1066.5519 | 0.01  | 52  | 3  |
| QSVSNLEKK          | +2       | 516.7911 | 1031.5676 | 1031.5611 | 0.01  | 41  | 2  |
| VKVNKDDIQK         | +2       | 593.8477 | 1185.6809 | 1185.6717 | 0.01  | 69  | 8  |
| TELADKVSK          | +2       | 495.7803 | 989.5461  | 989.5393  | 0.01  | 53  | 8  |
| YAEERDRAEAEAR      | +2       | 783.3743 | 1564.7341 | 1564.7229 | 0.01  | 44  | 3  |
| RQLEEAEEEAQR       | +2       | 744.3644 | 1486.7143 | 1486.7011 | 0.01  | 67  | 3  |
| NAEQFKDQADKASTR    | +2       | 854.9249 | 1707.8353 | 1707.8176 | 0.02  | 76  | 6  |
| THEAQIQEMR         | +2       | 622.3306 | 1242.6466 | 1241.5822 | 1.06  | 50  | 4  |

Identified Human Platelet Proteins

|                   |    |          |           |           |      |     |     |
|-------------------|----|----------|-----------|-----------|------|-----|-----|
| ASREEILAQAKENEK   | +2 | 858.4590 | 1714.9035 | 1714.8849 | 0.02 | 77  | 3   |
| LQKDLEGLSQR       | +2 | 643.8605 | 1285.7064 | 1285.6990 | 0.01 | 49  | 4   |
| AKQTLENERGELANEVK | +2 | 965.0170 | 1928.0195 | 1927.9962 | 0.02 | 103 | 5   |
| LKNKHEAMITDLEER   | +2 | 913.9836 | 1825.9527 | 1825.9356 | 0.02 | 92  | 10  |
| KFDQLLAEKTIKSAK   | +2 | 860.9836 | 1719.9526 | 1719.9406 | 0.01 | 84  | 3   |
| LDPHLVLDQLR       | +2 | 659.8826 | 1317.7507 | 1317.7405 | 0.01 | 52  | 17  |
| KLQAQMK           | +2 | 423.7498 | 845.4850  | 845.4793  | 0.01 | 55  | 105 |
| ALLQGKGDSEHK      | +2 | 641.8460 | 1281.6775 | 1281.6677 | 0.01 | 50  | 20  |
| RQQQLTAMK         | +2 | 552.3073 | 1102.6000 | 1102.5917 | 0.01 | 43  | 7   |
| VRTELADKVSK       | +2 | 623.3666 | 1244.7187 | 1244.7088 | 0.01 | 55  | 5   |
| TVGQLYKEQLAK      | +2 | 689.3959 | 1376.7773 | 1376.7663 | 0.01 | 71  | 9   |
| QIATLHAQVDTMK     | +2 | 728.3907 | 1454.7669 | 1454.7551 | 0.01 | 96  | 5   |
| HEMPPHIYAITDTAYR  | +3 | 638.9833 | 1913.9280 | 1913.9094 | 0.02 | 43  | 1   |
| QLLQANPILEAFGNAK  | +2 | 863.9836 | 1725.9526 | 1725.9413 | 0.01 | 96  | 101 |
| SFVEKVVQEQQGTHPK  | +3 | 571.6407 | 1711.9002 | 1711.8893 | 0.01 | 46  | 2   |
| KKVEAQLQELQVK     | +2 | 770.9622 | 1539.9099 | 1539.8984 | 0.01 | 97  | 16  |
| LRLEVNQLQAMK      | +2 | 657.8853 | 1313.7560 | 1313.7489 | 0.01 | 53  | 6   |
| VSHLLGINVDTDFTR   | +2 | 786.4365 | 1570.8584 | 1570.8467 | 0.01 | 90  | 34  |
| VISGVLQLGNIVFK    | +2 | 743.9583 | 1485.9020 | 1485.8918 | 0.01 | 101 | 34  |
| VIQYLAHVASSHK     | +2 | 726.9067 | 1451.7989 | 1451.7885 | 0.01 | 79  | 52  |
| QRYEILTNSIPK      | +2 | 779.9386 | 1557.8626 | 1557.8515 | 0.01 | 55  | 8   |
| ALLQGKGDSEHKR     | +2 | 719.8974 | 1437.7802 | 1437.7688 | 0.01 | 83  | 29  |
| QIATLHAQVDTMCK    | +2 | 792.4373 | 1582.8601 | 1582.8501 | 0.01 | 77  | 9   |
| KVIQYLAHVASSHK    | +2 | 790.9553 | 1579.8961 | 1579.8834 | 0.01 | 95  | 25  |
| VISGVLQLGNIVFKK   | +2 | 808.0068 | 1613.9991 | 1613.9868 | 0.01 | 78  | 18  |
| AGKLDPHLVLDQLR    | +2 | 787.9604 | 1573.9063 | 1573.8940 | 0.01 | 77  | 30  |

No. 673. Protein IPI00199655 Matched (SEQUEST MASCOT) N Y emPAI Strategy.Hits 0.22 1 0 2 0 5 PepMatched(SEQUEST MASCOT) SpectraMatched(SEQUEST MASCOT)

\*Des: 25 kDa protein

SEQUEST:(PepMatched Observed.Hits Coverage)

MASCOT:(PepMatched Observed.Hits Coverage) 2 1 11.84%

| Seq           | Charge | ObservedMS | ExpectedMS | CalculatedMS | PepScore | PepHits |
|---------------|--------|------------|------------|--------------|----------|---------|
| EALNANTNTEVLK | +2     | 773.8572   | 1545.6998  | 1544.7682    | 0.93     | 59 4    |
| KIEQELTAAKK   | +3     | 420.2541   | 1257.7406  | 1257.7292    | 0.01     | 43 1    |

No. 674. Protein IPI00209115 Matched (SEQUEST MASCOT) Y Y emPAI Strategy.Hits 0.32 1 3 2 7 8 PepMatched(SEQUEST MASCOT) SpectraMatched(SEQUEST MASCOT)

\*Des: Slc25a3 protein

SEQUEST:(PepMatched Observed.Hits Coverage) 3 2 11.01%

| Seq           | Charge | Xcor  | Delta | Probability | PepHits |
|---------------|--------|-------|-------|-------------|---------|
| GIFNGFSITLK   | +2     | 2.814 | 0.410 | 0.9991      | 2       |
| IQTQPGYANTLR  | +2     | 3.413 | 0.480 | 0.9999      | 3       |
| LPRPPPEMPESLK | +3     | 3.925 | 0.397 | 0.9999      | 2       |

MASCOT:(PepMatched Observed.Hits Coverage) 2 1 6.88%

| Seq          | Charge | ObservedMS | ExpectedMS | CalculatedMS | PepScore | PepHits |
|--------------|--------|------------|------------|--------------|----------|---------|
| IQTQPGYANTLR | +2     | 681.37     | 1360.72    | 1360.71      | 0.01     | 75 6    |

Identified Human Platelet Proteins

GIFNGFSITLK +2 598.84 1195.68 1195.66 0.02 45 3

No. 675. Protein IPI00208241 Matched (SEQUEST MASCOT) Y N emPAI Strategy.Hits 0.13 1 PepMatched(SEQUEST MASCOT) 3 SpectraMatched(SEQUEST MASCOT) 0  
 \*Des: Splice Isoform Stat5A1 of Signal transducer and activator of transcription 5A  
 SEQUEST:(PepMatched Observed.Hits Coverage) 3 1 4.95%  
 Seq Charge Xcor Delta Proability PepHits  
 LGHYATQLQNTYDR+2 4.353 0.612 1.0000 3  
 LAEIIWQNR +2 3.618 0.165 0.9928 4  
 FSDSEIGGITIAWK +2 3.006 0.396 0.9981 1  
 MASCOT:(PepMatched Observed.Hits Coverage)

No. 676. Protein IPI00199657 Matched (SEQUEST MASCOT) Y Y emPAI Strategy.Hits 1.69 1 PepMatched(SEQUEST MASCOT) 2 SpectraMatched(SEQUEST MASCOT) 4  
 \*Des: 21 kDa protein  
 SEQUEST:(PepMatched Observed.Hits Coverage) 2 2 12.62%  
 Seq Charge Xcor Delta Proability PepHits  
 KSNQQAVSPK +2 2.961 0.269 0.9899 2  
 SGNSGNQRPSYQK +2 3.748 0.389 0.9994 3  
 MASCOT:(PepMatched Observed.Hits Coverage) 2 2 12.62%  
 Seq Charge ObservedMS ExpectedMS CalculatedMS Pepscore PepHits  
 KSNQQAVSPK +2 543.8026 1085.5907 1085.5829 0.01 57 2  
 SGNSGNQRPSYQK +2 711.8446 1421.6747 1421.6647 0.01 61 2

No. 677. Protein IPI00551558 Matched (SEQUEST MASCOT) Y Y emPAI Strategy.Hits 0.06 1 PepMatched(SEQUEST MASCOT) 2 SpectraMatched(SEQUEST MASCOT) 6  
 \*Des: Type II keratin Kb2  
 SEQUEST:(PepMatched Observed.Hits Coverage) 2 1 4.01%  
 Seq Charge Xcor Delta Proability PepHits  
 GFSSGS AVVSGGSR +2 3.833 0.435 1.0000 3  
 LLRDYQELMNVK +3 3.098 0.268 0.9979 2  
 MASCOT:(PepMatched Observed.Hits Coverage) 2 1 4.01%  
 Seq Charge ObservedMS ExpectedMS CalculatedMS Pepscore PepHits  
 GFSSGS AVVSGGSR +2 627.8087 1253.6029 1253.5999 0 83 6  
 LLRDYQELMNVK +2 761.4108 1520.8070 1520.8020 0.01 42 4

No. 678. Protein IPI00364715 Matched (SEQUEST MASCOT) Y Y emPAI Strategy.Hits 0.63 1 PepMatched(SEQUEST MASCOT) 3 SpectraMatched(SEQUEST MASCOT) 3  
 \*Des: PREDICTED: similar to Auh protein  
 SEQUEST:(PepMatched Observed.Hits Coverage) 3 1 13.7%  
 Seq Charge Xcor Delta Proability PepHits  
 MHSSEVGPVFSK +2 3.157 0.475 0.9998 6  
 GIVVLGINR +2 3.399 0.354 0.9995 1  
 AVGLISHVLEQNEGDAAYR +2 5.030 0.383 0.9999 4  
 MASCOT:(PepMatched Observed.Hits Coverage) 3 1 13.7%  
 Seq Charge ObservedMS ExpectedMS CalculatedMS Pepscore PepHits  
 MHSSEVGPVFSK +2 652.82 1303.63 1303.62 0.01 56 6

Identified Human Platelet Proteins

|                     |    |        |         |         |      |    |   |  |
|---------------------|----|--------|---------|---------|------|----|---|--|
| GIVVLGINR           | +2 | 470.80 | 939.59  | 939.59  | 0    | 58 | 1 |  |
| AVGLISHVLEQNEGDAAYR | +3 | 724.04 | 2169.10 | 2169.08 | 0.02 | 43 | 3 |  |

No. 679. Protein IPI00208315 Matched (SEQUEST MASCOT) N Y emPAI 0.04 Strategy.Hits 4 PepMatched(SEQUEST MASCOT) 0 SpectraMatched(SEQUEST MASCOT) 10 0 539

\*Des: PREDICTED: similar to myosin-VIIb

SEQUEST:(PepMatched Observed.Hits Coverage)

MASCOT:(PepMatched Observed.Hits Coverage)

| Seq                    | Charge | ObservedMS | ExpectedMS | CalculatedMS | PepScore | PepHits |
|------------------------|--------|------------|------------|--------------|----------|---------|
| GYSFTTTAER             | +2     | 566.77     | 1131.52    | 1131.52      | 0        | 59      |
| VAPEEHPVLLTEAPLNPK     | +2     | 977.54     | 1953.06    | 1953.06      | 0        | 65      |
| KDLYANTVLSGGTMYPGIADR  | +3     | 781.73     | 2342.16    | 2342.16      | 0        | 74      |
| AGFAGDDAPR             | +2     | 488.73     | 975.44     | 975.44       | 0        | 53      |
| AVFPSIVGRPR            | +2     | 599.86     | 1197.70    | 1197.70      | 0        | 49      |
| DSYVGDEAQSQR           | +2     | 677.82     | 1353.62    | 1353.62      | 0        | 47      |
| HQGMVGMGQKDSYVGDEAQSQR | +3     | 784.36     | 2350.07    | 2350.07      | 0        | 56      |
| HQGMVGMGQKDSYVGDEAQSQR | +3     | 836.40     | 2506.17    | 2506.17      | 0        | 70      |
| HQGMVGMGQK             | +2     | 586.29     | 1170.56    | 1170.56      | 0        | 52      |
| SYELPDGQVITIGNER       | +2     | 895.95     | 1789.88    | 1789.88      | 0        | 90      |

No. 680. Protein IPI00231643 Matched (SEQUEST MASCOT) Y N emPAI 0.5 Strategy.Hits 1 PepMatched(SEQUEST MASCOT) 2 SpectraMatched(SEQUEST MASCOT) 0 2 0

\*Des: Superoxide dismutase

SEQUEST:(PepMatched Observed.Hits Coverage)

| Seq                      | Charge | Xcor  | Delta | Probability | PepHits |
|--------------------------|--------|-------|-------|-------------|---------|
| GDGPVQGVHFEQK            | +2     | 2.728 | 0.500 | 0.9826      | 1       |
| DGVANVSIEDRVISLSGEHSIIGR | +3     | 6.881 | 0.791 | 1.0000      | 1       |

MASCOT:(PepMatched Observed.Hits Coverage)

No. 681. Protein IPI00366247 Matched (SEQUEST MASCOT) Y Y emPAI 0.7 Strategy.Hits 1 PepMatched(SEQUEST MASCOT) 3 SpectraMatched(SEQUEST MASCOT) 3 5 5

\*Des: PREDICTED: similar to RIKEN cDNA 4921531G14

SEQUEST:(PepMatched Observed.Hits Coverage)

| Seq                 | Charge | Xcor  | Delta | Probability | PepHits |
|---------------------|--------|-------|-------|-------------|---------|
| YAGWAANQINR         | +2     | 3.183 | 0.501 | 0.9996      | 2       |
| YTQGGLENLELSR       | +2     | 3.445 | 0.429 | 0.9990      | 2       |
| NSEQIMEVGEELINDYASK | +3     | 5.070 | 0.610 | 1.0000      | 1       |

MASCOT:(PepMatched Observed.Hits Coverage)

| Seq                 | Charge | ObservedMS | ExpectedMS | CalculatedMS | PepScore | PepHits |
|---------------------|--------|------------|------------|--------------|----------|---------|
| YAGWAANQINR         | +2     | 632.32     | 1262.62    | 1262.62      | 0        | 49      |
| YTQGGLENLELSR       | +2     | 740.38     | 1478.75    | 1478.74      | 0.01     | 65      |
| NSEQIMEVGEELINDYASK | +3     | 723.68     | 2168.00    | 2167.99      | 0.01     | 50      |

No. 682. Protein IPI00206712 Matched (SEQUEST MASCOT) Y Y emPAI 0.33 Strategy.Hits 1 PepMatched(SEQUEST MASCOT) 3 SpectraMatched(SEQUEST MASCOT) 3 6 8

\*Des: Inositol monophosphatase

SEQUEST:(PepMatched Observed.Hits Coverage)

Identified Human Platelet Proteins

| No.   | Protein                                     | Matched (SEQUEST MASCOT) | emPAI      | Strategy.Hits | PepMatched(SEQUEST MASCOT) | SpectraMatched(SEQUEST MASCOT) |        |          |         |
|-------|---------------------------------------------|--------------------------|------------|---------------|----------------------------|--------------------------------|--------|----------|---------|
| 683.  | IPI00188225                                 | Y                        | N          | 1.68          | 1                          | 3                              | 0      | 3        | 0       |
| *Des: | C-reactive protein precursor                |                          |            |               |                            |                                |        |          |         |
|       | SEQUEST:(PepMatched Observed.Hits Coverage) |                          |            | 3             | 1                          |                                | 14.95% |          |         |
|       | Seq                                         | Charge                   | Xcor       | Delta         | Probability                | PepHits                        |        |          |         |
|       | SSPADLVTVDQK                                | +2                       |            | 3.112         | 0.386                      | 0.9989                         | 2      |          |         |
|       | IIAASNIALAER                                | +2                       |            | 3.049         | 0.488                      | 0.9998                         | 5      |          |         |
|       | SLLVTELGSSR                                 | +2                       |            | 3.134         | 0.392                      | 0.9994                         | 1      |          |         |
|       | MASCOT:(PepMatched Observed.Hits Coverage)  |                          |            | 3             | 1                          |                                | 13.82% |          |         |
|       | Seq                                         | Charge                   | ObservedMS | ExpectedMS    | CalculatedMS               |                                |        | PepScore | PepHits |
|       | SSPADLVTVDQK                                | +2                       | 680.85     | 1359.69       | 1359.69                    | 0                              | 51     |          | 2       |
|       | IIAASNIALAER                                | +2                       | 622.34     | 1242.67       | 1240.71                    | 1.96                           | 54     |          | 6       |
|       | SLLVTELGSSR                                 | +2                       | 581.33     | 1160.65       | 1160.64                    | 0.01                           | 61     |          | 1       |
| 684.  | IPI00195372                                 | Y                        | Y          | 0.3           | 2                          | 5                              | 3      | 7        | 24      |
| *Des: | Elongation factor 1-alpha 1                 |                          |            |               |                            |                                |        |          |         |
|       | SEQUEST:(PepMatched Observed.Hits Coverage) |                          |            | 5             | 2                          |                                | 16.8%  |          |         |
|       | Seq                                         | Charge                   | Xcor       | Delta         | Probability                | PepHits                        |        |          |         |
|       | IGGIGTVPVGR                                 | +2                       |            | 3.415         | 0.392                      | 0.9928                         | 4      |          |         |
|       | THINIVVIGHVDSGK                             | +3                       |            | 3.378         | 0.477                      | 0.9998                         | 1      |          |         |
|       | YYVTIIDAPGHR                                | +3                       |            | 2.654         | 0.467                      | 0.9996                         | 2      |          |         |
|       | EHALLAYTLGVK                                | +3                       |            | 3.856         | 0.473                      | 0.9999                         | 2      |          |         |
|       | VETGVLPKPGMVVTFAPVNVTTTEVK                  | +3                       |            | 3.503         | 0.393                      | 0.9989                         | 1      |          |         |
|       | MASCOT:(PepMatched Observed.Hits Coverage)  |                          |            | 3             | 1                          |                                | 8.93%  |          |         |
|       | Seq                                         | Charge                   | ObservedMS | ExpectedMS    | CalculatedMS               |                                |        | PepScore | PepHits |
|       | YYVTIIDAPGHR                                | +3                       | 468.9119   | 1403.7139     | 1403.7197                  | 0                              | 42     |          | 7       |
|       | THINIVVIGHVDSGK                             | +3                       | 530.2991   | 1587.8754     | 1587.8732                  | 0                              | 52     |          | 15      |
|       | EHALLAYTLGVK                                | +2                       | 657.8748   | 1313.7350     | 1313.7343                  | 0                              | 52     |          | 28      |
| 685.  | IPI00208249                                 | Y                        | Y          | 0.53          | 3                          | 4                              | 5      | 15       | 17      |
| *Des: | Chloride intracellular channel protein 4    |                          |            |               |                            |                                |        |          |         |
|       | SEQUEST:(PepMatched Observed.Hits Coverage) |                          |            | 4             | 5                          |                                | 21.31% |          |         |
|       | Seq                                         | Charge                   | Xcor       | Delta         | Probability                | PepHits                        |        |          |         |
|       | EEDKEPLIELFVK                               | +2                       |            | 3.591         | 0.371                      | 0.9810                         | 5      |          |         |
|       | HPESNTAGMDIFAK                              | +2                       |            | 3.621         | 0.465                      | 0.9999                         | 4      |          |         |
|       | NSRPEANEALER                                | +2                       |            | 2.927         | 0.288                      | 0.9889                         | 2      |          |         |
|       | GVVFSVTTVDLK                                | +2                       |            | 4.086         | 0.532                      | 1.0000                         | 14     |          |         |
|       | MASCOT:(PepMatched Observed.Hits Coverage)  |                          |            | 5             | 2                          |                                | 24.8%  |          |         |
|       | Seq                                         | Charge                   | ObservedMS | ExpectedMS    | CalculatedMS               |                                |        | PepScore | PepHits |

**Identified Human Platelet Proteins**

|                |    |        |         |         |      |    |    |
|----------------|----|--------|---------|---------|------|----|----|
| YLTNAYSR       | +2 | 494.25 | 986.49  | 986.48  | 0.01 | 47 | 3  |
| NSRPEANEALER   | +2 | 693.34 | 1384.67 | 1384.67 | 0    | 48 | 2  |
| HPESNTAGMDIFAK | +2 | 759.36 | 1516.71 | 1516.70 | 0.01 | 69 | 4  |
| GVVFSVTTVDLK   | +2 | 632.87 | 1263.72 | 1263.71 | 0.01 | 91 | 12 |
| EEDKEPLIELFVK  | +2 | 794.93 | 1587.84 | 1587.84 | 0    | 51 | 5  |

No. 686. Protein IPI00230775 Matched (SEQUEST MASCOT) N Y emPAI Strategy.Hits 0.56 3 PepMatched(SEQUEST MASCOT) 0 4 SpectraMatched(SEQUEST MASCOT) 0 33

\*Des: Splice Isoform 1 of Tropomyosin beta chain

SEQUEST:(PepMatched Observed.Hits Coverage)

MASCOT:(PepMatched Observed.Hits Coverage) 4 3 14.87%

| Seq              | Charge | ObservedMS | ExpectedMS | CalculatedMS | PepScore  | PepHits |     |
|------------------|--------|------------|------------|--------------|-----------|---------|-----|
| ATDAEADVASLNR    | +2     | 666.8300   | 1331.6455  | 1331.6317    | 0.01      | 7       |     |
| MELQEMQLK        | +2     | 575.2916   | 1148.5687  | 1148.5569    | 0.01      | 3       |     |
| RIQLVEEELDR      | +2     | 700.3923   | 1398.7700  | 1398.7466    | 0.02      | 13      |     |
| AMKDEEKMELQEMQLK | +2     |            | 990.9909   | 1979.9673    | 1979.9366 | 0.03    | 121 |

No. 687. Protein IPI00363847 Matched (SEQUEST MASCOT) Y Y emPAI Strategy.Hits 0.8 2 PepMatched(SEQUEST MASCOT) 6 3 SpectraMatched(SEQUEST MASCOT) 14 21

\*Des: PREDICTED: similar to ARP2/3 complex 16 kDa subunit (p16-ARC) (Actin-related protein 2/3 complex subunit 5)

SEQUEST:(PepMatched Observed.Hits Coverage) 6 2 25.52%

| Seq                             | Charge | Xcor  | Delta | Probility | PepHits |
|---------------------------------|--------|-------|-------|-----------|---------|
| ALAAGGVGSIVR                    | +2     | 3.729 | 0.458 | 0.9933    | 3       |
| AVQSLDKNGVDLLMK                 | +3     | 3.332 | 0.671 | 0.9997    | 2       |
| QGNMTAALQAALKNPPINTK            | +2     | 3.799 | 0.555 | 0.9894    | 3       |
| YIYKGFESPSDNSSAMLLQWHEK         | +3     | 5.938 | 0.724 | 1.0000    | 2       |
| GFESPSDNSSAMLLQWHEKALAAGGVGSIVR | +3     | 5.525 | 0.741 | 1.0000    | 3       |
| AVQSLDKNGVDLLMKYIYK             | +3     | 4.617 | 0.617 | 1.0000    | 2       |

MASCOT:(PepMatched Observed.Hits Coverage) 3 1 13.15%

| Seq                  | Charge | ObservedMS | ExpectedMS | CalculatedMS | PepScore | PepHits |
|----------------------|--------|------------|------------|--------------|----------|---------|
| ALAAGGVGSIVR         | +2     | 535.8227   | 1069.6308  | 1069.6243    | 0.01     | 73      |
| AVQSLDKNGVDLLMK      | +2     | 815.9519   | 1629.8893  | 1629.8759    | 0.01     | 66      |
| QGNMTAALQAALKNPPINTK | +2     | 1041.0742  | 2080.1339  | 2080.1098    | 0.02     | 67      |

No. 688. Protein IPI00568946 Matched (SEQUEST MASCOT) Y N emPAI Strategy.Hits 0.56 1 PepMatched(SEQUEST MASCOT) 2 0 SpectraMatched(SEQUEST MASCOT) 2 0

\*Des: 22 kDa protein

SEQUEST:(PepMatched Observed.Hits Coverage) 2 1 9.42%

| Seq               | Charge | Xcor  | Delta | Probility | PepHits |
|-------------------|--------|-------|-------|-----------|---------|
| IAYQRNDDDEEEAAR   | +3     | 4.613 | 0.429 | 1.0000    | 1       |
| IAYQRNDDDEEEAARER | +3     | 3.791 | 0.271 | 0.9976    | 1       |

MASCOT:(PepMatched Observed.Hits Coverage)

No. 689. Protein IPI00360362 Matched (SEQUEST MASCOT) Y Y emPAI Strategy.Hits 0.81 4 PepMatched(SEQUEST MASCOT) 23 16 SpectraMatched(SEQUEST MASCOT) 105 150

\*Des: PREDICTED: similar to CDNA sequence BC032204

SEQUEST:(PepMatched Observed.Hits Coverage) 23 25 45.05%

Identified Human Platelet Proteins

| Seq                                        | Charge | Xcor       | Delta      | Probability  | PepHits |         |        |          |         |  |
|--------------------------------------------|--------|------------|------------|--------------|---------|---------|--------|----------|---------|--|
| LTQLYEQAR                                  | +2     |            | 3.573      | 0.428        | 0.9998  | 9       |        |          |         |  |
| VFVGEEDEPEAQSRTL                           |        | +2         |            | 5.263        | 0.400   | 1.0000  | 5      |          |         |  |
| SQDEAPGDPIQLNLK                            |        | +2         |            | 4.880        | 0.471   | 1.0000  | 6      |          |         |  |
| ILEAHQNVAQLSLTEAQLR                        |        | +2         |            | 6.397        | 0.589   | 1.0000  | 10     |          |         |  |
| TASGDYIDSSWELR                             |        | +2         |            | 4.988        | 0.532   | 1.0000  | 4      |          |         |  |
| AGDVLWLR                                   |        | +2         |            | 3.072        | 0.280   | 0.9946  | 6      |          |         |  |
| QWNVNWDIR                                  |        | +2         |            | 2.739        | 0.172   | 0.9555  | 3      |          |         |  |
| DEILGIANNR                                 |        | +2         |            | 2.792        | 0.281   | 0.9892  | 1      |          |         |  |
| IDLAVGDVVK                                 |        | +2         |            | 3.173        | 0.423   | 0.9993  | 5      |          |         |  |
| VTLSGDVGEASGDPGLDDDLDAALNNLEVK             |        |            |            |              | +3      | 6.136   | 0.583  | 1.0000   | 2       |  |
| GEELDEDLFLQLTGGHEAF                        |        | +2         |            | 5.271        | 0.631   | 1.0000  | 2      |          |         |  |
| LLVPSPEGMSEIYLR                            |        | +3         |            | 5.250        | 0.532   | 1.0000  | 8      |          |         |  |
| GEELDEDLFLQLTGGHEA                         |        | +2         |            | 5.233        | 0.683   | 1.0000  | 1      |          |         |  |
| EKEPEEEVHDLTR                              |        | +3         |            | 3.355        | 0.347   | 0.9996  | 6      |          |         |  |
| KQDWSDHAIWWEQK                             |        | +3         |            | 3.516        | 0.319   | 0.9997  | 1      |          |         |  |
| KDEILGIANNR                                |        | +3         |            | 3.249        | 0.323   | 0.9996  | 11     |          |         |  |
| VTGESHIGGVLLK                              |        | +2         |            | 4.027        | 0.440   | 0.9997  | 6      |          |         |  |
| KQDWSDHAIWWEQKK                            |        | +3         |            | 4.567        | 0.379   | 1.0000  | 3      |          |         |  |
| VVLGGVAPTLFR                               |        | +2         |            | 4.514        | 0.560   | 1.0000  | 42     |          |         |  |
| LKGSAPSDMLDSLTTIPELKDHLR                   |        |            |            | +3           | 5.517   | 0.520   | 1.0000 | 24       |         |  |
| LIRIDLAVGDVVK                              |        | +2         |            | 2.941        | 0.502   | 0.9973  | 5      |          |         |  |
| ASFSKPLFQTVAAICR                           |        | +2         |            | 4.875        | 0.600   | 1.0000  | 22     |          |         |  |
| PSSLLDKTQLHSR                              |        | +3         |            | 3.779        | 0.470   | 0.9999  | 7      |          |         |  |
| MASCOT:(PepMatched Observed.Hits Coverage) |        |            |            | 16           | 27      | 41.06%  |        |          |         |  |
| Seq                                        | Charge | ObservedMS | ExpectedMS | CalculatedMS |         |         |        | Pepscore | PepHits |  |
| LTQLYEQAR                                  | +2     | 561.30     | 1120.59    | 1120.59      | 0       | 59      | 6      |          |         |  |
| KDEILGIANNR                                | +2     | 621.84     | 1241.68    | 1241.67      | 0.01    | 51      | 3      |          |         |  |
| VTGESHIGGVLLK                              | +2     | 655.38     | 1308.74    | 1308.74      | 0       | 46      | 6      |          |         |  |
| SQDEAPGDPIQLNLK                            | +2     | 876.94     | 1751.87    | 1751.87      | 0       | 89      | 5      |          |         |  |
| VFVGEEDEPEAQSRTL                           | +2     | 888.44     | 1774.88    | 1774.87      | 0.01    | 102     | 12     |          |         |  |
| AGDVLWLR                                   | +2     | 465.74     | 929.47     | 928.51       | 0.96    | 56      | 6      |          |         |  |
| TASGDYIDSSWELR                             | +2     | 800.37     | 1598.73    | 1598.72      | 0.01    | 83      | 2      |          |         |  |
| KQWLLQTHWTLDK                              | +2     | 848.96     | 1695.92    | 1695.91      | 0.01    | 49      | 2      |          |         |  |
| ILEAHQNVAQLSLTEAQLR                        | +3     | 712.06     | 2133.16    | 2133.15      | 0.01    | 57      | 4      |          |         |  |
| AGGTNGGSGNKPGLEASAEGLNPYGLVAPR             | +3     |            |            | 980.82       | 2939.44 | 2938.45 | 0.99   | 44       | 2       |  |
| YYSFFDLDPK                                 | +2     | 647.80     | 1293.59    | 1293.59      | 0       | 55      | 2      |          |         |  |
| VVLGGVAPTLFR                               | +2     | 650.39     | 1298.77    | 1298.77      | 0       | 64      | 8      |          |         |  |
| FIQAWQSLPFDGISYVIVR                        | +3     | 747.07     | 2238.18    | 2238.18      | 0       | 43      | 1      |          |         |  |
| TMADSSYASEVQAILAFLSLQR                     | +3     | 801.07     | 2400.20    | 2400.20      | 0       | 62      | 3      |          |         |  |
| GSAPSDMLDSLTTIPELK                         | +2     | 937.97     | 1873.93    | 1873.93      | 0       | 52      | 9      |          |         |  |
| VTLSGDVGEASGDPGLDDDLDAALNNLEVK             | +3     |            |            | 999.84       | 2996.49 | 2996.48 | 0.01   | 77       | 4       |  |

| No.   | Protein                                     | Matched (SEQUEST MASCOT) | emPAI | Strategy.Hits | PepMatched(SEQUEST MASCOT) | SpectraMatched(SEQUEST MASCOT) |
|-------|---------------------------------------------|--------------------------|-------|---------------|----------------------------|--------------------------------|
| 690.  | IPI00210381                                 | Y Y                      | 0.17  | 2             | 2                          | 4 6 10                         |
| *Des: | Ras-related protein Rab-11B                 |                          |       |               |                            |                                |
|       | SEQUEST:(PepMatched Observed.Hits Coverage) |                          | 2     | 1             | 12.61%                     |                                |



Identified Human Platelet Proteins

| Seq                                        | Charge | Xcor       | Delta      | Proability   | PepHits   |   |          |         |
|--------------------------------------------|--------|------------|------------|--------------|-----------|---|----------|---------|
| AQIWDTAGQER                                |        | +2         | 3.736      | 0.564        | 1.0000    | 6 |          |         |
| DHADSNIVIMLVGNK                            |        | +2         | 5.051      | 0.528        | 1.0000    | 2 |          |         |
| MASCOT:(PepMatched Observed.Hits Coverage) |        |            |            |              |           | 4 | 2        | 19.81%  |
| Seq                                        | Charge | ObservedMS | ExpectedMS | CalculatedMS |           |   | Pepscore | PepHits |
| AITSAYYR                                   |        | +2         | 472.7452   | 943.4759     | 943.4763  | 0 | 43       | 8       |
| VVLIGDSGVGK                                |        | +2         | 522.3075   | 1042.6004    | 1042.6022 | 0 | 34       | 4       |
| STIGVEFATR                                 |        | +2         | 540.7875   | 1079.5604    | 1079.5611 | 0 | 36       | 4       |
| AQIWDTAGQER                                |        | +2         | 637.8096   | 1273.6046    | 1273.6051 | 0 | 40       | 2       |

No. 691. Protein IPI00328073 Matched (SEQUEST MASCOT) Y Y emPAI Strategy.Hits 0.37 5 21 25 36 46 PepMatched(SEQUEST MASCOT) SpectraMatched(SEQUEST MASCOT)

\*Des: Splice Isoform PDE5A2 of cGMP-specific 3',5'-cyclic phosphodiesterase

| Seq                                         | Charge | Xcor       | Delta      | Proability   | PepHits |      |          |         |
|---------------------------------------------|--------|------------|------------|--------------|---------|------|----------|---------|
| SEQUEST:(PepMatched Observed.Hits Coverage) |        |            |            |              |         | 21   | 9        | 35.41%  |
| EEVVGVAQAINK                                |        | +2         | 4.171      | 0.405        | 0.9998  | 5    |          |         |
| FNAEVDQITGYK                                |        | +2         | 3.977      | 0.503        | 0.9999  | 2    |          |         |
| KELNMEPADLMNR                               |        | +2         | 3.636      | 0.404        | 0.9995  | 2    |          |         |
| INMYAQYVK                                   |        | +2         | 3.115      | 0.357        | 0.9987  | 1    |          |         |
| NTMEPLNIPDVTK                               |        | +2         | 3.684      | 0.445        | 0.9998  | 2    |          |         |
| KNEFSFEDPLQK                                |        | +2         | 2.887      | 0.331        | 0.9951  | 3    |          |         |
| ELQALAAAVVPSAQTLK                           |        | +2         | 4.253      | 0.566        | 1.0000  | 2    |          |         |
| VFQMEWEEVGK                                 |        | +2         | 3.321      | 0.534        | 0.9999  | 1    |          |         |
| QMTLVLEVLSYHASAAEEETR                       |        | +2         | 5.209      | 0.573        | 1.0000  | 3    |          |         |
| RGEFFELIR                                   |        | +2         | 2.730      | 0.208        | 0.9744  | 2    |          |         |
| IAELVAAEFFDQGDRER                           |        | +2         | 3.756      | 0.446        | 0.9923  | 2    |          |         |
| IAATIISFMQVQK                               |        | +3         | 4.645      | 0.408        | 1.0000  | 3    |          |         |
| IAELVAAEFFDQGD                              |        | +2         | 5.058      | 0.480        | 1.0000  | 2    |          |         |
| MFTDLNLVQNFQMK                              |        | +2         | 4.674      | 0.507        | 1.0000  | 2    |          |         |
| QAILATDLALYIK                               |        | +2         | 3.327      | 0.464        | 0.9997  | 1    |          |         |
| NHREEVVGVAQAINK                             |        | +3         | 4.265      | 0.404        | 0.9987  | 1    |          |         |
| LTDLETLALLIAALSHDLDR                        |        | +4         | 5.107      | 0.538        | 1.0000  | 11   |          |         |
| NQVLLDLASLIFEEQQSLEVILKK                    |        | +3         | 4.925      | 0.486        | 1.0000  | 4    |          |         |
| RNQVLLDLASLIFEEQQSLEVILK                    |        | +3         | 3.282      | 0.417        | 0.9996  | 1    |          |         |
| EEVVGVAQAINKK                               |        | +2         | 3.440      | 0.386        | 0.9991  | 2    |          |         |
| WQALADQKEK                                  |        | +2         | 2.830      | 0.226        | 0.9806  | 2    |          |         |
| MASCOT:(PepMatched Observed.Hits Coverage)  |        |            |            |              |         | 25   | 12       | 37.42%  |
| Seq                                         | Charge | ObservedMS | ExpectedMS | CalculatedMS |         |      | Pepscore | PepHits |
| GVNNSYIQR                                   |        | +2         | 525.77     | 1049.53      | 1049.53 | 0    | 43       | 1       |
| EEVVGVAQAINK                                |        | +2         | 628.85     | 1255.68      | 1255.68 | 0    | 86       | 4       |
| EEVVGVAQAINKK                               |        | +2         | 692.90     | 1383.78      | 1383.77 | 0.01 | 59       | 1       |
| NHREEVVGVAQAINK                             |        | +3         | 555.30     | 1662.88      | 1662.88 | 0    | 53       | 1       |
| FNAEVDQITGYK                                |        | +2         | 692.84     | 1383.67      | 1383.67 | 0    | 72       | 2       |
| KELNMEPADLMNR                               |        | +2         | 780.88     | 1559.75      | 1559.74 | 0.01 | 59       | 1       |
| DSEGTVSFLSDSGK                              |        | +2         | 714.83     | 1427.65      | 1427.64 | 0.01 | 86       | 4       |
| DSEGTVSFLSDSGKK                             |        | +2         | 778.88     | 1555.75      | 1555.74 | 0.01 | 58       | 4       |
| INMYAQYVK                                   |        | +2         | 646.82     | 1291.63      | 1291.63 | 0    | 46       | 1       |

Identified Human Platelet Proteins

|                        |    |        |         |         |      |     |   |  |  |
|------------------------|----|--------|---------|---------|------|-----|---|--|--|
| NTMEPLNIPDVTK          | +2 | 736.38 | 1470.75 | 1470.74 | 0.01 | 59  | 2 |  |  |
| KNEFSFEDPLQK           | +2 | 741.87 | 1481.73 | 1480.72 | 1.01 | 52  | 2 |  |  |
| GEFFELIR               | +2 | 505.77 | 1009.52 | 1009.52 | 0    | 44  | 1 |  |  |
| VFQMEWEEVGK            | +2 | 691.33 | 1380.65 | 1380.64 | 0.01 | 55  | 1 |  |  |
| IAATIISFMQVQK          | +3 | 483.94 | 1448.81 | 1448.81 | 0    | 60  | 2 |  |  |
| IAELVAAEFFDQGDR        | +2 | 840.92 | 1679.82 | 1679.82 | 0    | 106 | 4 |  |  |
| ELQALAAAVVPSAQLK       | +2 | 855.50 | 1708.98 | 1708.97 | 0.01 | 67  | 2 |  |  |
| MFTDLNLVQNFQMK         | +2 | 864.93 | 1727.84 | 1727.84 | 0    | 83  | 2 |  |  |
| IAELVAAEFFDQGDRER      | +2 | 983.49 | 1964.96 | 1964.96 | 0    | 56  | 3 |  |  |
| QMVTLEVLVSYHASAAEEETR  | +3 | 755.37 | 2263.09 | 2263.08 | 0.01 | 41  | 1 |  |  |
| DMVNAWFSE              | +2 | 627.79 | 1253.56 | 1253.55 | 0.01 | 60  | 2 |  |  |
| GIVGHVAAFGEPLNIK       | +2 | 811.46 | 1620.91 | 1620.90 | 0.01 | 56  | 4 |  |  |
| QAILATDLALYIK          | +2 | 716.93 | 1431.84 | 1431.83 | 0.01 | 46  | 1 |  |  |
| LTDLETLALLIAALSHDLDR   | +3 | 777.43 | 2329.28 | 2329.26 | 0.02 | 55  | 2 |  |  |
| NQVLLDLASLIFEEQQSLEVLK | +3 | 881.50 | 2641.48 | 2641.46 | 0.02 | 81  | 3 |  |  |
| NQVLLDLASLIFEEQQSLEVLK | +3 | 924.20 | 2769.58 | 2769.55 | 0.03 | 64  | 3 |  |  |

No. 692. Protein IPI00554034 Matched (SEQUEST MASCOT) Y Y emPAI Strategy.Hits 1.31 3 PepMatched(SEQUEST MASCOT) 2 4 SpectraMatched(SEQUEST MASCOT) 6 31

\*Des: 24 kDa protein

|                                             |        |            |            |              |         |                  |
|---------------------------------------------|--------|------------|------------|--------------|---------|------------------|
| SEQUEST:(PepMatched Observed.Hits Coverage) |        | 2          | 1          | 13.2%        |         |                  |
| Seq                                         | Charge | Xcor       | Delta      | Probility    | PepHits |                  |
| VAAALPGMESTQDR                              | +2     |            | 3.034      | 0.429        | 0.9964  | 4                |
| ELNVMFIETSAK                                | +2     |            | 3.557      | 0.510        | 0.9997  | 2                |
| MASCOT:(PepMatched Observed.Hits Coverage)  |        | 4          | 3          | 24.52%       |         |                  |
| Seq                                         | Charge | ObservedMS | ExpectedMS | CalculatedMS |         | PepScore PepHits |
| LVFLGEQSVGK                                 | +2     | 588.8753   | 1175.7360  | 1175.6550    | 0.08    | 39 1             |
| LQLWDTAGQER                                 | +2     | 658.8825   | 1315.7504  | 1315.6520    | 0.1     | 62 2             |
| ELNVMFIETSAK                                | +2     | 691.4074   | 1380.8002  | 1380.6958    | 0.1     | 60 1             |
| VAAALPGMESTQDR                              | +2     | 723.4117   | 1444.8088  | 1444.6980    | 0.11    | 73 2             |

No. 693. Protein IPI00551702 Matched (SEQUEST MASCOT) Y Y emPAI Strategy.Hits 0.51 1 PepMatched(SEQUEST MASCOT) 2 4 SpectraMatched(SEQUEST MASCOT) 5 5

\*Des: Dihydrolipoyllysine-residue succinyltransferase component of 2- oxoglutarate dehydrogenase complex, mitochondrial precursor

|                                             |        |            |            |              |         |                  |
|---------------------------------------------|--------|------------|------------|--------------|---------|------------------|
| SEQUEST:(PepMatched Observed.Hits Coverage) |        | 2          | 1          | 7.57%        |         |                  |
| Seq                                         | Charge | Xcor       | Delta      | Probility    | PepHits |                  |
| NVETMNYADIER                                | +2     |            | 4.123      | 0.551        | 1.0000  | 2                |
| ASAFALQEQPVVNAVIDDATK                       | +2     |            | 6.116      | 0.583        | 1.0000  | 3                |
| MASCOT:(PepMatched Observed.Hits Coverage)  |        | 4          | 1          | 12.33%       |         |                  |
| Seq                                         | Charge | ObservedMS | ExpectedMS | CalculatedMS |         | PepScore PepHits |
| NVETMNYADIER                                | +2     | 727.83     | 1453.65    | 1453.65      | 0       | 64 2             |
| LGFMSAFVK                                   | +2     | 500.27     | 998.53     | 998.53       | 0       | 61 1             |
| VEGGTPLFTLR                                 | +2     | 595.34     | 1188.66    | 1188.65      | 0.01    | 44 1             |
| ASAFALQEQPVVNAVIDDATK                       | +3     | 729.72     | 2186.13    | 2186.12      | 0.01    | 42 1             |

No. 694. Protein IPI00388249 Matched (SEQUEST MASCOT) Y Y emPAI Strategy.Hits 0.44 4 PepMatched(SEQUEST MASCOT) 6 7 SpectraMatched(SEQUEST MASCOT) 9 12

Identified Human Platelet Proteins

\*Des: Calpain-2 catalytic subunit

| SEQUEST:(PepMatched Observed.Hits Coverage) |        | 6          | 6          | 12.23%       |          |         |         |    |   |
|---------------------------------------------|--------|------------|------------|--------------|----------|---------|---------|----|---|
| Seq                                         | Charge | Xcor       | Delta      | Proability   | PepHits  |         |         |    |   |
| EAAEGLGSHER                                 | +2     |            | 3.488      | 0.289        | 0.9993   | 2       |         |    |   |
| DREAAEGLGSHER                               | +2     |            | 3.955      | 0.502        | 1.0000   | 6       |         |    |   |
| MGEDMHTIGFGIYEVPEELTGQTNHLSK                | +3     |            |            | 3.898        | 0.471    | 1.0000  | 3       |    |   |
| RPTEICADPQFIIGGATR                          | +2     |            |            | 3.757        | 0.555    | 1.0000  | 2       |    |   |
| LAKDREAAEGLGSHER                            | +3     |            |            | 4.412        | 0.508    | 1.0000  | 8       |    |   |
| GHAYSVTGAAEEVSSGSLQK                        | +3     |            |            | 3.854        | 0.420    | 1.0000  | 3       |    |   |
| MASCOT:(PepMatched Observed.Hits Coverage)  |        | 7          | 6          | 16.17%       |          |         |         |    |   |
| Seq                                         | Charge | ObservedMS | ExpectedMS | CalculatedMS | Pepscore |         | PepHits |    |   |
| SGTMNSYEMR                                  | +2     | 588.24     | 1174.47    | 1174.47      | 0        | 47      | 3       |    |   |
| IMVDMLDEDGSGK                               | +2     | 705.32     | 1408.62    | 1408.62      | 0        | 73      | 2       |    |   |
| NPWGQVEWTGK                                 | +2     | 650.38     | 1298.74    | 1300.62      | -1.87    | 53      | 3       |    |   |
| FADDELIIDFDNFVR                             | +3     | 610.29     | 1827.86    | 1827.87      | 0        | 64      | 4       |    |   |
| QEDGEFWMSFSDFLR                             | +2     |            | 947.41     | 1892.81      | 1892.80  | 0.01    | 54      | 1  |   |
| LFAQLAGEDAEISAFELQILR                       | +3     |            | 812.44     | 2434.29      | 2434.27  | 0.02    | 41      | 2  |   |
| DGELLFVHSAEGSEFWSALLEK                      | +3     |            |            | 822.07       | 2463.20  | 2463.20 | 0       | 54 | 2 |

| No.  | Protein     | Matched (SEQUEST MASCOT) | emPAI | Strategy.Hits | PepMatched(SEQUEST MASCOT) | SpectraMatched(SEQUEST MASCOT) |
|------|-------------|--------------------------|-------|---------------|----------------------------|--------------------------------|
| 695. | IPI00551632 | N Y                      | 0.3   | 1             | 0 7 0                      | 24                             |

\*Des: Alpha-ETF

| SEQUEST:(PepMatched Observed.Hits Coverage) |        |            |            |              |          |      |         |   |
|---------------------------------------------|--------|------------|------------|--------------|----------|------|---------|---|
| MASCOT:(PepMatched Observed.Hits Coverage)  |        | 7          | 1          | 42.18%       |          |      |         |   |
| Seq                                         | Charge | ObservedMS | ExpectedMS | CalculatedMS | Pepscore |      | PepHits |   |
| GTSFEAAAASGGSASSEK                          | +2     | 807.87     | 1613.73    | 1613.72      | 0.01     | 112  | 2       |   |
| APSSSSAGISEWLDQK                            | +2     | 831.90     | 1661.80    | 1661.79      | 0.01     | 84   | 2       |   |
| AAVDAGFVPNDMQVGQTGK                         | +2     | 952.97     | 1903.92    | 1903.91      | 0.01     | 76   | 4       |   |
| LLYDLADQLHAAVGASR                           | +2     | 906.99     | 1811.96    | 1811.95      | 0.01     | 106  | 2       |   |
| GLLPEELTPLILETQK                            | +2     | 897.52     | 1793.02    | 1793.02      | 0        | 55   | 4       |   |
| IVAPELYIAVGISGAIQHLAGMK                     | +3     | 784.12     | 2349.33    | 2350.31      | -0.97    | 55   | 10      |   |
| TIVAINKDPEAPIFQVADYGVADLFK                  | +3     |            | 983.21     | 2946.59      | 2946.57  | 0.02 | 86      | 4 |

| No.  | Protein     | Matched (SEQUEST MASCOT) | emPAI | Strategy.Hits | PepMatched(SEQUEST MASCOT) | SpectraMatched(SEQUEST MASCOT) |
|------|-------------|--------------------------|-------|---------------|----------------------------|--------------------------------|
| 696. | IPI00554039 | N Y                      | 0.47  | 1             | 0 6 0                      | 293                            |

\*Des: PREDICTED: similar to glyceraldehyde-3-phosphate dehydrogenase

| SEQUEST:(PepMatched Observed.Hits Coverage) |        |            |            |              |          |     |         |
|---------------------------------------------|--------|------------|------------|--------------|----------|-----|---------|
| MASCOT:(PepMatched Observed.Hits Coverage)  |        | 6          | 1          | 26.54%       |          |     |         |
| Seq                                         | Charge | ObservedMS | ExpectedMS | CalculatedMS | Pepscore |     | PepHits |
| GAAQNIIPASTGAAK                             | +2     | 685.38     | 1368.74    | 1368.74      | 0        | 101 | 238     |
| VGVNGFGR                                    | +2     | 403.22     | 804.43     | 804.42       | 0.01     | 58  | 141     |
| LVNNGKPITIFQER                              | +2     | 814.98     | 1627.94    | 1627.90      | 0.04     | 72  | 2       |
| LISWYDNEYGYSNR                              | +2     | 890.40     | 1778.79    | 1778.79      | 0        | 80  | 97      |
| RVIIAPSADAPMFVMGVNHEK                       | +3     | 790.41     | 2368.21    | 2368.20      | 0.01     | 57  | 8       |
| VVDLMAYMASK                                 | +2     | 614.31     | 1226.61    | 1226.60      | 0.01     | 87  | 90      |

| No. | Protein | Matched (SEQUEST MASCOT) | emPAI | Strategy.Hits | PepMatched(SEQUEST MASCOT) | SpectraMatched(SEQUEST MASCOT) |
|-----|---------|--------------------------|-------|---------------|----------------------------|--------------------------------|
|-----|---------|--------------------------|-------|---------------|----------------------------|--------------------------------|

Identified Human Platelet Proteins

697. IPI00372810 Y Y 0.07 1 2 2 4 3

\*Des: PREDICTED: similar to eukaryotic translation initiation factor 3, subunit 10 theta, 150/170kDa

SEQUEST:(PepMatched Observed.Hits Coverage) 2 1 1.62%

| Seq            | Charge | Xcor | Delta | Probability | PepHits  |
|----------------|--------|------|-------|-------------|----------|
| LLDMDGIIVEK    | +2     |      | 3.638 | 0.482       | 0.9999 3 |
| DLYNWLEVEFNPLK | +2     |      | 4.069 | 0.437       | 0.9997 1 |

MASCOT:(PepMatched Observed.Hits Coverage) 2 1 1.62%

| Seq            | Charge | ObservedMS | ExpectedMS | CalculatedMS | Pepscore | PepHits |
|----------------|--------|------------|------------|--------------|----------|---------|
| LLDMDGIIVEK    | +2     | 623.35     | 1244.68    | 1244.67      | 0.01     | 57 3    |
| DLYNWLEVEFNPLK | +2     | 890.46     | 1778.90    | 1778.89      | 0.01     | 54 1    |

No. Protein Matched (SEQUEST MASCOT) emPAI Strategy.Hits PepMatched(SEQUEST MASCOT) SpectraMatched(SEQUEST MASCOT)

698. IPI00454532 N Y 0.27 1 0 4 0 10

\*Des: Similar to enthoprotin; epsin 4; clathrin interacting protein localized in the trans-Golgi region

SEQUEST:(PepMatched Observed.Hits Coverage)

MASCOT:(PepMatched Observed.Hits Coverage) 4 2 11.04%

| Seq            | Charge | ObservedMS | ExpectedMS | CalculatedMS | Pepscore | PepHits |
|----------------|--------|------------|------------|--------------|----------|---------|
| IGSTIDDTISK    | +2     | 575.30     | 1148.59    | 1148.59      | 0        | 43 3    |
| TIDLGAAAHYTGDK | +2     | 716.86     | 1431.70    | 1431.70      | 0        | 42 3    |
| ATNVVMNYSEIESK | +2     | 792.88     | 1583.75    | 1583.75      | 0        | 50 1    |
| SLLLLAYLIR     | +2     | 587.88     | 1173.75    | 1173.75      | 0        | 75 3    |

No. Protein Matched (SEQUEST MASCOT) emPAI Strategy.Hits PepMatched(SEQUEST MASCOT) SpectraMatched(SEQUEST MASCOT)

699. IPI00471519 Y Y 2.6 4 18 16 75 260

\*Des: Bridging integrator 2

SEQUEST:(PepMatched Observed.Hits Coverage) 18 14 43.99%

| Seq                     | Charge | Xcor | Delta | Probability | PepHits    |
|-------------------------|--------|------|-------|-------------|------------|
| ASGGGLSSPPGSAEASK       | +2     |      | 4.180 | 0.519       | 1.0000 10  |
| SATQVVSNDENTEL          | +2     |      | 2.999 | 0.212       | 0.9642 1   |
| TMENYVSQFSEVKER         | +2     |      | 4.697 | 0.544       | 1.0000 5   |
| VSETLQEIYNSDWDGHEDLK    | +2     |      | 4.957 | 0.526       | 1.0000 9   |
| AIVGNNDLLWEDYEEK        | +2     |      | 5.708 | 0.567       | 1.0000 2   |
| AIVGNNDLLWEDYEEKLADQALR | +3     |      | 4.886 | 0.654       | 1.0000 8   |
| MAKAEEDFSK              | +2     |      | 2.815 | 0.386       | 0.9896 2   |
| SQEEAAPCSPTSSLGR        | +2     |      | 3.731 | 0.516       | 1.0000 2   |
| SATQVVSNDENTE           | +2     |      | 3.462 | 0.383       | 0.9826 3   |
| TMENYVSQFSEVK           | +2     |      | 3.448 | 0.524       | 1.0000 1   |
| FEQSASNFYQQQAEGHR       | +2     |      | 4.830 | 0.540       | 1.0000 3   |
| AGGAAGLFAK              | +2     |      | 3.561 | 0.430       | 0.9997 8   |
| RVSETLQEIYNSDWDGHEDLK   | +3     |      | 6.161 | 0.484       | 1.0000 2   |
| EGTGSSGPKEPHASSTK       | +2     |      | 3.337 | 0.544       | 0.9990 3   |
| EMSKLNHSLYEVMSK         | +2     |      | 3.906 | 0.442       | 0.9982 1   |
| HHLEAVQNAK              | +2     |      | 3.049 | 0.313       | 0.9960 68  |
| TSAPPSRPPPPK            | +3     |      | 2.542 | 0.534       | 1.0000 157 |
| GQTGKEHSPPGEVVLRL       | +2     |      | 4.834 | 0.478       | 1.0000 21  |

MASCOT:(PepMatched Observed.Hits Coverage) 16 15 36.24%

| Seq | Charge | ObservedMS | ExpectedMS | CalculatedMS | Pepscore | PepHits |
|-----|--------|------------|------------|--------------|----------|---------|
|     |        |            |            |              |          |         |

Identified Human Platelet Proteins

|                   |    |          |           |           |      |     |     |  |
|-------------------|----|----------|-----------|-----------|------|-----|-----|--|
| MAKAEEDFSK        | +2 | 578.2744 | 1154.5343 | 1154.5277 | 0.01 | 46  | 10  |  |
| LVDYDSAR          | +2 | 469.7354 | 937.4562  | 937.4505  | 0.01 | 41  | 34  |  |
| SQEEAAPCSPTSSLGR  | +2 | 810.3764 | 1618.7383 | 1618.7257 | 0.01 | 59  | 4   |  |
| ASGGGLSSPPGSAEASK | +2 | 730.3602 | 1458.7058 | 1458.6950 | 0.01 | 77  | 14  |  |
| TMENYVSQFSEVK     | +2 | 781.3688 | 1560.7231 | 1560.7130 | 0.01 | 59  | 12  |  |
| AIVGNNDLLWEDYEEK  | +2 | 954.4615 | 1906.9085 | 1906.8948 | 0.01 | 123 | 6   |  |
| TMENYVSQFSEVKER   | +2 | 923.9434 | 1845.8722 | 1845.8566 | 0.02 | 103 | 10  |  |
| AGGAAGLFAK        | +2 | 431.7452 | 861.4758  | 861.4708  | 0    | 94  | 12  |  |
| KLVDYDSAR         | +2 | 533.7838 | 1065.5531 | 1065.5454 | 0.01 | 61  | 13  |  |
| EMSKLNHSLYEVMSK   | +2 | 898.4476 | 1794.8806 | 1794.8644 | 0.02 | 59  | 2   |  |
| DLKNFLSAVK        | +2 | 567.8340 | 1133.6535 | 1133.6444 | 0.01 | 42  | 4   |  |
| EGTGSSGPKEPHASSTK | +2 | 828.9039 | 1655.7933 | 1655.7750 | 0.02 | 50  | 8   |  |
| TSAPPSRPPPPK      | +2 | 616.3484 | 1230.6823 | 1230.6721 | 0.01 | 79  | 274 |  |
| HHLEAVQNAK        | +2 | 573.8085 | 1145.6024 | 1145.5941 | 0.01 | 61  | 106 |  |
| GQTGKEHSPPGEVVL   | +2 | 845.9539 | 1689.8933 | 1689.8798 | 0.01 | 92  | 34  |  |
| HHLEAVQNAKK       | +2 | 637.8570 | 1273.6994 | 1273.6891 | 0.01 | 48  | 6   |  |

No. 700. Protein IPI00199663 Matched (SEQUEST MASCOT) N Y emPAI Strategy.Hits 0.1 1 PepMatched(SEQUEST MASCOT) 0 3 SpectraMatched(SEQUEST MASCOT) 0 6

\*Des: Glycerol-3-phosphate dehydrogenase, mitochondrial precursor  
 SEQUEST:(PepMatched Observed.Hits Coverage)  
 MASCOT:(PepMatched Observed.Hits Coverage) 3 1 6.08%

| Seq              | Charge | ObservedMS | ExpectedMS | CalculatedMS | PepScore | PepHits |   |
|------------------|--------|------------|------------|--------------|----------|---------|---|
| MNLAIALTAAR      | +2     | 572.83     | 1143.64    | 1143.64      | 0        | 45      | 2 |
| LAFLNVQAAEEALPK  | +2     | 807.45     | 1612.89    | 1612.88      | 0.01     | 44      | 2 |
| YGAATANYMEVVSLLK | +2     | 864.96     | 1727.90    | 1728.88      | -0.97    | 47      | 2 |

No. 701. Protein IPI00231721 Matched (SEQUEST MASCOT) Y Y emPAI Strategy.Hits 0.71 1 PepMatched(SEQUEST MASCOT) 2 4 SpectraMatched(SEQUEST MASCOT) 2 11

\*Des: Protein-L-isoaspartate (D-aspartate) O-methyltransferase 1  
 SEQUEST:(PepMatched Observed.Hits Coverage) 2 1 22.07%

| Seq                                | Charge | Xcor  | Delta | Probility | PepHits |
|------------------------------------|--------|-------|-------|-----------|---------|
| MGFAEEAPYDAIHVGAAAPVVPQALIDQLKPGGR | +3     | 5.902 | 0.638 | 1.0000    | 5       |
| SGGASHSELIHNLK                     | +3     | 2.828 | 0.313 | 0.9983    | 3       |

MASCOT:(PepMatched Observed.Hits Coverage) 4 1 33.76%

| Seq                                | Charge | ObservedMS | ExpectedMS | CalculatedMS | PepScore | PepHits |   |
|------------------------------------|--------|------------|------------|--------------|----------|---------|---|
| LILPVGPPAGGNQMLEQYDKLQDGSVK        | +3     | 924.1584   | 2769.4535  | 2769.4370    | 0.02     | 41      | 2 |
| MGFAEEAPYDAIHVGAAAPVVPQALIDQLKPGGR | +3     | 1163.6112  | 3487.8118  | 3487.7921    | 0.02     | 93      | 8 |
| SGGASHSELIHNLK                     | +3     | 493.2581   | 1476.7524  | 1476.7433    | 0.01     | 55      | 2 |
| SGGASHSELIHNLK                     | +2     | 803.4318   | 1604.8490  | 1604.8382    | 0.01     | 57      | 1 |

No. 702. Protein IPI00370130 Matched (SEQUEST MASCOT) Y N emPAI Strategy.Hits 0.16 1 PepMatched(SEQUEST MASCOT) 2 0 SpectraMatched(SEQUEST MASCOT) 3 0

\*Des: PREDICTED: similar to serine/threonine protein kinase MST4a  
 SEQUEST:(PepMatched Observed.Hits Coverage) 2 1 5.96%

| Seq           | Charge | Xcor  | Delta | Probility | PepHits |
|---------------|--------|-------|-------|-----------|---------|
| AANVLLSEQGDVK | +2     | 2.991 | 0.334 | 0.9591    | 1       |

Identified Human Platelet Proteins

LWIMEYLGGSALDLLR +3 5.907 0.553 1.0000 2  
 MASCOT:(PepMatched Observed.Hits Coverage)

| No.   | Protein                                                | Matched (SEQUEST MASCOT) | emPAI      | Strategy.Hits | PepMatched(SEQUEST MASCOT) | SpectraMatched(SEQUEST MASCOT) |
|-------|--------------------------------------------------------|--------------------------|------------|---------------|----------------------------|--------------------------------|
| 703.  | IPI00231726                                            | Y Y                      | 0.28       | 2             | 3 2 5                      | 2                              |
| *Des: | Guanine nucleotide-binding protein G(k), alpha subunit |                          |            |               |                            |                                |
|       | SEQUEST:(PepMatched Observed.Hits Coverage)            |                          | 3          | 1             | 13.64%                     |                                |
|       | Seq                                                    | Charge Xcor              | Delta      | Proability    | PepHits                    |                                |
|       | ISQTNYIPTQQDVLR                                        | +2                       | 3.837      | 0.383         | 0.9992 1                   |                                |
|       | NVQFVFDAVTDVLIK                                        | +2                       | 5.362      | 0.425         | 1.0000 3                   |                                |
|       | VVVYSNTIQSIIAIR                                        | +2                       | 3.987      | 0.422         | 0.9996 2                   |                                |
|       | MASCOT:(PepMatched Observed.Hits Coverage)             |                          | 2          | 1             | 4.73%                      |                                |
|       | Seq                                                    | Charge ObservedMS        | ExpectedMS | CalculatedMS  | Pepscore PepHits           |                                |
|       | LLLLGAGESGK                                            | +2                       | 529.3199   | 1056.6252     | 1056.6178                  | 0.01 60 1                      |
|       | LLLLGAGESGKSTIVK                                       | +3                       | 529.3199   | 1584.9378     | 1584.9450                  | 0 43 1                         |

| No.   | Protein                                     | Matched (SEQUEST MASCOT) | emPAI      | Strategy.Hits | PepMatched(SEQUEST MASCOT) | SpectraMatched(SEQUEST MASCOT) |
|-------|---------------------------------------------|--------------------------|------------|---------------|----------------------------|--------------------------------|
| 704.  | IPI00382295                                 | N Y                      | 0.14       | 2             | 0 5 0                      | 23                             |
| *Des: | Ac2-125                                     |                          |            |               |                            |                                |
|       | SEQUEST:(PepMatched Observed.Hits Coverage) |                          | 5          | 2             | 5.48%                      |                                |
|       | MASCOT:(PepMatched Observed.Hits Coverage)  |                          | 5          | 2             | 5.48%                      |                                |
|       | Seq                                         | Charge ObservedMS        | ExpectedMS | CalculatedMS  | Pepscore PepHits           |                                |
|       | EVLEYNTVGGK                                 | +2                       | 604.82     | 1207.62       | 1207.61                    | 0.01 66 12                     |
|       | VLTEDELGHPEK                                | +2                       | 683.85     | 1365.69       | 1365.68                    | 0.01 51 12                     |
|       | VLTEDELGHPEKGDAITR                          | +3                       | 660.68     | 1979.00       | 1979.00                    | 0 44 12                        |
|       | IKEVLEYNTVGGK                               | +3                       | 483.94     | 1448.80       | 1448.79                    | 0.01 44 4                      |
|       | GLTVVQTFQELVEPR                             | +2                       | 858.48     | 1714.94       | 1714.93                    | 0.01 76 4                      |

| No.   | Protein                                     | Matched (SEQUEST MASCOT) | emPAI      | Strategy.Hits | PepMatched(SEQUEST MASCOT) | SpectraMatched(SEQUEST MASCOT) |
|-------|---------------------------------------------|--------------------------|------------|---------------|----------------------------|--------------------------------|
| 705.  | IPI00230925                                 | Y Y                      | 16.42      | 2             | 5 2 20                     | 26                             |
| *Des: | Thymosin beta-4                             |                          |            |               |                            |                                |
|       | SEQUEST:(PepMatched Observed.Hits Coverage) |                          | 5          | 3             | 120.45%                    |                                |
|       | Seq                                         | Charge Xcor              | Delta      | Proability    | PepHits                    |                                |
|       | ETIEQEKQAGE                                 | +2                       | 3.993      | 0.365         | 0.9694 3                   |                                |
|       | TETQEKNPLPSK                                | +2                       | 3.875      | 0.237         | 0.9801 4                   |                                |
|       | TETQEKNPLPSKETIEQEK                         | +3                       | 4.709      | 0.483         | 1.0000 2                   |                                |
|       | NPLPSKETIEQEKQAGES                          | +2                       | 3.869      | 0.527         | 1.0000 1                   |                                |
|       | KTETQEKNPLPSK                               | +2                       | 4.266      | 0.486         | 1.0000 22                  |                                |
|       | MASCOT:(PepMatched Observed.Hits Coverage)  |                          | 2          | 1             | 31.81%                     |                                |
|       | Seq                                         | Charge ObservedMS        | ExpectedMS | CalculatedMS  | Pepscore PepHits           |                                |
|       | TETQEKNPLPSK                                | +2                       | 686.3647   | 1370.7149     | 1370.7041                  | 0.01 65 6                      |
|       | KTETQEKNPLPSK                               | +2                       | 750.4125   | 1498.8105     | 1498.7991                  | 0.01 86 34                     |

| No.   | Protein                                     | Matched (SEQUEST MASCOT) | emPAI | Strategy.Hits | PepMatched(SEQUEST MASCOT) | SpectraMatched(SEQUEST MASCOT) |
|-------|---------------------------------------------|--------------------------|-------|---------------|----------------------------|--------------------------------|
| 706.  | IPI00569825                                 | N Y                      | 0.22  | 1             | 0 2 0                      | 3                              |
| *Des: | 35 kDa protein                              |                          |       |               |                            |                                |
|       | SEQUEST:(PepMatched Observed.Hits Coverage) |                          |       |               |                            |                                |

| Identified Human Platelet Proteins |                                                               |                                             |        |               |                            |                                |                  |    |    |
|------------------------------------|---------------------------------------------------------------|---------------------------------------------|--------|---------------|----------------------------|--------------------------------|------------------|----|----|
|                                    |                                                               | MASCOT:(PepMatched Observed.Hits Coverage)  |        | 2             | 1                          | 4.06%                          |                  |    |    |
|                                    |                                                               | Seq                                         | Charge | ObservedMS    | ExpectedMS                 | CalculatedMS                   | Pepscore PepHits |    |    |
|                                    |                                                               | GAWSNVLR                                    | +2     | 451.7454      | 901.4763                   | 901.4770                       | 0                | 46 | 1  |
|                                    |                                                               | AFCKGAWSNVLR                                | +3     | 451.7454      | 1352.2144                  | 1350.6866                      | 1.53             | 41 | 2  |
| No.                                | Protein                                                       | Matched (SEQUEST MASCOT)                    | emPAI  | Strategy.Hits | PepMatched(SEQUEST MASCOT) | SpectraMatched(SEQUEST MASCOT) |                  |    |    |
| 707.                               | IPI00208256                                                   | Y                                           | Y      | 0.51          | 3                          | 14                             | 10               | 26 | 30 |
| *Des:                              | Heat shock protein 86                                         |                                             |        |               |                            |                                |                  |    |    |
|                                    |                                                               | SEQUEST:(PepMatched Observed.Hits Coverage) |        | 14            | 5                          | 26.8%                          |                  |    |    |
|                                    |                                                               | Seq                                         | Charge | Xcor          | Delta                      | Proability                     | PepHits          |    |    |
|                                    |                                                               | EGLELPEDEEEKK                               | +2     | 3.384         | 0.367                      | 0.9626                         | 1                |    |    |
|                                    |                                                               | EGLELPEDEEEK                                | +2     | 3.057         | 0.366                      | 0.9976                         | 1                |    |    |
|                                    |                                                               | YYTSASGDEMVS                                | +2     | 3.911         | 0.575                      | 1.0000                         | 2                |    |    |
|                                    |                                                               | HIYFITGETK                                  | +2     | 3.090         | 0.428                      | 0.9995                         | 4                |    |    |
|                                    |                                                               | VILHLKEDQTEYL                               | +3     | 4.437         | 0.565                      | 1.0000                         | 4                |    |    |
|                                    |                                                               | ELHINLIPNKQDR                               | +2     | 3.406         | 0.461                      | 0.9922                         | 3                |    |    |
|                                    |                                                               | NPDDITNEEYGEFYK                             | +2     | 5.117         | 0.519                      | 1.0000                         | 2                |    |    |
|                                    |                                                               | HFSVEGQLEFR                                 | +3     | 3.560         | 0.430                      | 0.9999                         | 4                |    |    |
|                                    |                                                               | HNDDEQYAWESSAGGSFTVR                        | +2     | 6.744         | 0.718                      | 1.0000                         | 3                |    |    |
|                                    |                                                               | HLEINPDHSIIETLR                             | +3     | 3.668         | 0.479                      | 1.0000                         | 3                |    |    |
|                                    |                                                               | ADLNNLGTIAK                                 | +2     | 3.589         | 0.475                      | 0.9998                         | 3                |    |    |
|                                    |                                                               | APFDLFENR                                   | +2     | 2.968         | 0.511                      | 0.9999                         | 2                |    |    |
|                                    |                                                               | DLVILLYETALLSSGFSLEDPQTHANR                 | +3     | 6.074         | 0.646                      | 1.0000                         | 4                |    |    |
|                                    |                                                               | DQVANSFAFVER                                | +2     | 2.801         | 0.368                      | 0.9972                         | 2                |    |    |
|                                    |                                                               | MASCOT:(PepMatched Observed.Hits Coverage)  |        | 10            | 4                          | 18.49%                         |                  |    |    |
|                                    |                                                               | Seq                                         | Charge | ObservedMS    | ExpectedMS                 | CalculatedMS                   | Pepscore PepHits |    |    |
|                                    |                                                               | DNSTMGYMAAK                                 | +2     | 594.76        | 1187.50                    | 1187.50                        | 0                | 54 | 2  |
|                                    |                                                               | DQVANSFAFVER                                | +2     | 618.31        | 1234.60                    | 1234.59                        | 0.01             | 54 | 2  |
|                                    |                                                               | ELISNSSDALDK                                | +2     | 646.33        | 1290.64                    | 1290.63                        | 0.01             | 63 | 4  |
|                                    |                                                               | YYTSASGDEMVS                                | +2     | 775.86        | 1549.71                    | 1549.70                        | 0.01             | 77 | 2  |
|                                    |                                                               | ELHINLIPNKQDR                               | +2     | 795.44        | 1588.87                    | 1588.87                        | 0                | 44 | 4  |
|                                    |                                                               | TLTIVDTGIGMTK                               | +2     | 675.37        | 1348.73                    | 1348.73                        | 0                | 81 | 3  |
|                                    |                                                               | NPDDITNEEYGEFYK                             | +2     | 917.40        | 1832.78                    | 1832.77                        | 0.01             | 78 | 2  |
|                                    |                                                               | HLEINPDHSIIETLR                             | +3     | 596.32        | 1785.94                    | 1785.94                        | 0                | 43 | 4  |
|                                    |                                                               | APFDLFENR                                   | +2     | 554.77        | 1107.53                    | 1107.53                        | 0                | 50 | 4  |
|                                    |                                                               | HSQFIGYPITLFVEK                             | +2     | 889.98        | 1777.95                    | 1777.94                        | 0.01             | 74 | 24 |
| No.                                | Protein                                                       | Matched (SEQUEST MASCOT)                    | emPAI  | Strategy.Hits | PepMatched(SEQUEST MASCOT) | SpectraMatched(SEQUEST MASCOT) |                  |    |    |
| 708.                               | IPI00372748                                                   | Y                                           | Y      | 0.51          | 1                          | 4                              | 2                | 4  | 3  |
| *Des:                              | PREDICTED: similar to adenylosuccinate synthetase, non muscle |                                             |        |               |                            |                                |                  |    |    |
|                                    |                                                               | SEQUEST:(PepMatched Observed.Hits Coverage) |        | 4             | 1                          | 14.65%                         |                  |    |    |
|                                    |                                                               | Seq                                         | Charge | Xcor          | Delta                      | Proability                     | PepHits          |    |    |
|                                    |                                                               | VTVVLGAQWGDEGK                              | +2     | 3.090         | 0.282                      | 0.9899                         | 2                |    |    |
|                                    |                                                               | VGIGAFPTEQDNEIGELLQTR                       | +3     | 3.822         | 0.314                      | 0.9975                         | 1                |    |    |
|                                    |                                                               | SIYPTLEIDIEGELQQLK                          | +2     | 5.005         | 0.456                      | 1.0000                         | 2                |    |    |
|                                    |                                                               | LDILDMFTEIK                                 | +2     | 4.156         | 0.412                      | 0.9999                         | 1                |    |    |
|                                    |                                                               | MASCOT:(PepMatched Observed.Hits Coverage)  |        | 2             | 1                          | 5.17%                          |                  |    |    |

| Identified Human Platelet Proteins |                                                     |                          |            |               |                            |                                |      |    |          |         |
|------------------------------------|-----------------------------------------------------|--------------------------|------------|---------------|----------------------------|--------------------------------|------|----|----------|---------|
|                                    | Seq                                                 | Charge                   | ObservedMS | ExpectedMS    | CalculatedMS               |                                |      |    | Pepscore | PepHits |
|                                    | ELPVNAQNYVR                                         | +2                       | 651.85     | 1301.68       | 1301.67                    | 0.01                           | 47   | 2  |          |         |
|                                    | LDILDMFTEIK                                         | +2                       | 669.60     | 1337.19       | 1336.69                    | 0.5                            | 69   | 2  |          |         |
| No. 709.                           | Protein                                             | Matched (SEQUEST MASCOT) | emPAI      | Strategy.Hits | PepMatched(SEQUEST MASCOT) | SpectraMatched(SEQUEST MASCOT) |      |    |          |         |
|                                    | IPI00230857                                         | Y                        | Y          | 0.55          | 2                          | 4                              | 4    | 19 | 11       |         |
| *Des:                              | Adenylate kinase isoenzyme 2, mitochondrial         |                          |            |               |                            |                                |      |    |          |         |
|                                    | SEQUEST:(PepMatched Observed.Hits Coverage)         |                          |            | 4             | 1                          | 21.81%                         |      |    |          |         |
|                                    | Seq                                                 | Charge                   | Xcor       | Delta         | Proability                 | PepHits                        |      |    |          |         |
|                                    | SYHEEFNPPK                                          | +3                       |            | 3.084         | 0.295                      | 0.9973                         | 5    |    |          |         |
|                                    | LEAYHTQTTPLVEYYR                                    | +2                       |            | 4.966         | 0.521                      | 1.0000                         | 5    |    |          |         |
|                                    | NGFLLDGFPR                                          | +2                       |            | 3.379         | 0.496                      | 1.0000                         | 17   |    |          |         |
|                                    | LVSDEMVELIEK                                        | +2                       |            | 4.434         | 0.468                      | 1.0000                         | 2    |    |          |         |
|                                    | MASCOT:(PepMatched Observed.Hits Coverage)          |                          |            | 4             | 3                          | 23.86%                         |      |    |          |         |
|                                    | Seq                                                 | Charge                   | ObservedMS | ExpectedMS    | CalculatedMS               |                                |      |    | Pepscore | PepHits |
|                                    | APNALAPEPEHPK                                       | +2                       | 685.86     | 1369.71       | 1369.70                    | 0.01                           | 53   | 2  |          |         |
|                                    | AVLLGPPGAGK                                         | +2                       | 490.30     | 978.59        | 978.59                     | 0                              | 43   | 7  |          |         |
|                                    | LEAYHTQTTPLVEYYR                                    | +2                       |            | 992.50        | 1982.99                    | 1982.97                        | 0.02 | 76 | 5        |         |
|                                    | EAMKDDITGEPLIR                                      | +2                       | 794.42     | 1586.82       | 1586.80                    | 0.02                           | 51   | 4  |          |         |
| No. 710.                           | Protein                                             | Matched (SEQUEST MASCOT) | emPAI      | Strategy.Hits | PepMatched(SEQUEST MASCOT) | SpectraMatched(SEQUEST MASCOT) |      |    |          |         |
|                                    | IPI00364585                                         | Y                        | Y          | 0.25          | 1                          | 2                              | 2    | 2  | 2        |         |
| *Des:                              | Serine/threonine kinase receptor associated protein |                          |            |               |                            |                                |      |    |          |         |
|                                    | SEQUEST:(PepMatched Observed.Hits Coverage)         |                          |            | 2             | 1                          | 8.93%                          |      |    |          |         |
|                                    | Seq                                                 | Charge                   | Xcor       | Delta         | Proability                 | PepHits                        |      |    |          |         |
|                                    | YDYNSGEELESYK                                       | +2                       |            | 3.494         | 0.522                      | 0.9998                         | 1    |    |          |         |
|                                    | SFEAPATINSASLHPEK                                   | +2                       |            | 3.631         | 0.527                      | 0.9998                         | 1    |    |          |         |
|                                    | MASCOT:(PepMatched Observed.Hits Coverage)          |                          |            | 2             | 1                          | 8.93%                          |      |    |          |         |
|                                    | Seq                                                 | Charge                   | ObservedMS | ExpectedMS    | CalculatedMS               |                                |      |    | Pepscore | PepHits |
|                                    | YDYNSGEELESYK                                       | +2                       | 798.84     | 1595.67       | 1595.66                    | 0.01                           | 57   | 1  |          |         |
|                                    | SFEAPATINSASLHPEK                                   | +2                       |            | 899.96        | 1797.90                    | 1797.89                        | 0.01 | 74 | 2        |         |
| No. 711.                           | Protein                                             | Matched (SEQUEST MASCOT) | emPAI      | Strategy.Hits | PepMatched(SEQUEST MASCOT) | SpectraMatched(SEQUEST MASCOT) |      |    |          |         |
|                                    | IPI00194728                                         | Y                        | Y          | 0.79          | 4                          | 8                              | 8    | 24 | 23       |         |
| *Des:                              | Integrin-linked kinase ILK                          |                          |            |               |                            |                                |      |    |          |         |
|                                    | SEQUEST:(PepMatched Observed.Hits Coverage)         |                          |            | 8             | 10                         | 23.91%                         |      |    |          |         |
|                                    | Seq                                                 | Charge                   | Xcor       | Delta         | Proability                 | PepHits                        |      |    |          |         |
|                                    | YGEMPVDKAK                                          | +2                       |            | 2.451         | 0.380                      | 0.9743                         | 3    |    |          |         |
|                                    | MYAPAWVAPEALQK                                      | +2                       |            | 4.040         | 0.593                      | 1.0000                         | 4    |    |          |         |
|                                    | SAVVELMIR                                           | +2                       |            | 3.454         | 0.385                      | 0.9993                         | 3    |    |          |         |
|                                    | EVPFADLSNMEIGMK                                     | +2                       |            | 4.897         | 0.537                      | 1.0000                         | 5    |    |          |         |
|                                    | SVMIDEDMTAR                                         | +2                       |            | 3.343         | 0.481                      | 0.9997                         | 4    |    |          |         |
|                                    | LNENHSGELWK                                         | +2                       |            | 3.256         | 0.366                      | 0.9984                         | 1    |    |          |         |
|                                    | GDDTPLHLAASHGHR                                     | +3                       |            | 4.508         | 0.514                      | 1.0000                         | 13   |    |          |         |
|                                    | MGQNLNRIPYKDTFWK                                    | +2                       |            | 2.927         | 0.344                      | 0.9684                         | 1    |    |          |         |
|                                    | MASCOT:(PepMatched Observed.Hits Coverage)          |                          |            | 8             | 9                          | 24.56%                         |      |    |          |         |
|                                    | Seq                                                 | Charge                   | ObservedMS | ExpectedMS    | CalculatedMS               |                                |      |    | Pepscore | PepHits |



Identified Human Platelet Proteins

| Protein           | Matched (SEQUEST MASCOT) | emPAI  | Strategy.Hits | PepMatched(SEQUEST MASCOT) | SpectraMatched(SEQUEST MASCOT) |
|-------------------|--------------------------|--------|---------------|----------------------------|--------------------------------|
| GDDTPLHLAASHGHR   | +2                       | 792.39 | 1582.77       | 1582.76                    | 0.01                           |
| WQGNDIVVK         | +2                       | 529.79 | 1057.56       | 1057.56                    | 0                              |
| SVMIDEDMTAR       | +2                       | 634.29 | 1266.56       | 1266.56                    | 0                              |
| SAVVEMLIMR        | +2                       | 574.81 | 1147.61       | 1147.61                    | 0                              |
| MYAPAWVAPEALQK    | +2                       | 787.91 | 1573.80       | 1573.80                    | 0                              |
| EVPFADLSNMEIGMK   | +2                       | 840.91 | 1679.80       | 1679.79                    | 0.01                           |
| GMAFLHTLEPLIPR    | +3                       | 532.30 | 1593.87       | 1593.87                    | 0                              |
| SADMWSFAVLLWELVTR | +3                       | 675.35 | 2023.03       | 2023.02                    | 0.01                           |

| No.   | Protein                                     | Matched (SEQUEST MASCOT) | emPAI | Strategy.Hits | PepMatched(SEQUEST MASCOT) | SpectraMatched(SEQUEST MASCOT) |
|-------|---------------------------------------------|--------------------------|-------|---------------|----------------------------|--------------------------------|
| 712.  | IPI00365388                                 | Y N                      | 0.16  | 1             | 2                          | 0                              |
| *Des: | PREDICTED: similar to tumor protein D53     |                          |       |               |                            |                                |
|       | SEQUEST:(PepMatched Observed.Hits Coverage) |                          |       | 2             | 1                          | 2.97%                          |
|       | Seq                                         | Charge                   | Xcor  | Delta         | Proability                 | PepHits                        |
|       | THETLSHAGQK                                 | +2                       |       | 2.678         | 0.491                      | 0.9991                         |
|       | KTHETLSHAGQK                                | +2                       |       | 3.145         | 0.499                      | 0.9996                         |
|       | MASCOT:(PepMatched Observed.Hits Coverage)  |                          |       |               |                            |                                |

| No.   | Protein                                     | Matched (SEQUEST MASCOT) | emPAI      | Strategy.Hits | PepMatched(SEQUEST MASCOT) | SpectraMatched(SEQUEST MASCOT) |
|-------|---------------------------------------------|--------------------------|------------|---------------|----------------------------|--------------------------------|
| 713.  | IPI00194583                                 | N Y                      | 2.16       | 1             | 0                          | 3                              |
| *Des: | PREDICTED: similar to Apolipoprotein C2     |                          |            |               |                            |                                |
|       | SEQUEST:(PepMatched Observed.Hits Coverage) |                          |            | 3             | 1                          | 22.22%                         |
|       | MASCOT:(PepMatched Observed.Hits Coverage)  |                          |            |               |                            |                                |
|       | Seq                                         | Charge                   | ObservedMS | ExpectedMS    | CalculatedMS               | Pepscore PepHits               |
|       | AAAGELYQK                                   | +2                       | 475.7531   | 949.4917      | 949.4868                   | 0 63 7                         |
|       | TYLTSVDEK                                   | +2                       | 528.2704   | 1054.5263     | 1054.5182                  | 0.01 43 4                      |
|       | TYLTSVDEKLR                                 | +2                       | 662.8635   | 1323.7125     | 1323.7034                  | 0.01 43 1                      |

| No.   | Protein                                     | Matched (SEQUEST MASCOT) | emPAI      | Strategy.Hits | PepMatched(SEQUEST MASCOT) | SpectraMatched(SEQUEST MASCOT) |
|-------|---------------------------------------------|--------------------------|------------|---------------|----------------------------|--------------------------------|
| 714.  | IPI00230859                                 | Y Y                      | 1.11       | 2             | 6                          | 6                              |
| *Des: | Alcohol dehydrogenase                       |                          |            |               |                            |                                |
|       | SEQUEST:(PepMatched Observed.Hits Coverage) |                          |            | 6             | 2                          | 25.45%                         |
|       | Seq                                         | Charge                   | Xcor       | Delta         | Proability                 | PepHits                        |
|       | ALEALVAK                                    | +2                       |            | 2.576         | 0.288                      | 0.9920                         |
|       | YALSVGYR                                    | +2                       |            | 2.831         | 0.404                      | 0.9992                         |
|       | ALGLSNFSSR                                  | +2                       |            | 3.164         | 0.333                      | 0.9981                         |
|       | GLEVTAYSPLGSSDR                             | +2                       |            | 4.365         | 0.534                      | 1.0000                         |
|       | HPDEPVLLEEPVVLALAEK                         | +3                       |            | 5.591         | 0.525                      | 1.0000                         |
|       | ILQNIQVDFDFTFSPEEMK                         | +3                       |            | 3.669         | 0.373                      | 0.9994                         |
|       | MASCOT:(PepMatched Observed.Hits Coverage)  |                          |            |               |                            |                                |
|       | Seq                                         | Charge                   | ObservedMS | ExpectedMS    | CalculatedMS               | Pepscore PepHits               |
|       | ALEALVAK                                    | +2                       | 407.76     | 813.50        | 813.50                     | 0 51 9                         |
|       | SPAQILLR                                    | +2                       | 449.28     | 896.55        | 896.54                     | 0.01 48 5                      |
|       | ALGLSNFSSR                                  | +2                       | 526.28     | 1050.55       | 1050.55                    | 0 57 3                         |
|       | GLEVTAYSPLGSSDR                             | +2                       | 776.40     | 1550.78       | 1550.76                    | 0.02 73 2                      |
|       | MPLIGLGTWK                                  | +2                       | 558.32     | 1114.63       | 1114.62                    | 0.01 44 22                     |
|       | HPDEPVLLEEPVVLALAEK                         | +3                       | 700.06     | 2097.15       | 2097.14                    | 0.01 89 3                      |

Identified Human Platelet Proteins

| No.   | Protein                                                              | Matched (SEQUEST MASCOT) | emPAI | Strategy.Hits | PepMatched(SEQUEST MASCOT) | SpectraMatched(SEQUEST MASCOT) |
|-------|----------------------------------------------------------------------|--------------------------|-------|---------------|----------------------------|--------------------------------|
| 715.  | IPI00208188                                                          | Y Y                      | 0.2   | 2             | 4 4                        | 10 9                           |
| *Des: | Syntaxin binding protein 2                                           |                          |       |               |                            |                                |
|       | SEQUEST:(PepMatched Observed.Hits Coverage)                          |                          |       | 4             | 3                          | 12.41%                         |
|       | Seq Charge Xcor Delta                                                |                          |       | Probility     | PepHits                    |                                |
|       | MSDILAEGITIVEDINK                                                    |                          | +3    | 4.298         | 0.322                      | 0.9999 1                       |
|       | SVQALIADFQGTPTFTYK                                                   |                          | +2    | 3.071         | 0.506                      | 0.9994 1                       |
|       | KGPEDTAQLAHAVLAK                                                     |                          | +3    | 5.402         | 0.567                      | 1.0000 7                       |
|       | ATEGKWEVLIGSSHILTPTR                                                 |                          | +3    | 4.915         | 0.530                      | 1.0000 2                       |
|       | MASCOT:(PepMatched Observed.Hits Coverage)                           |                          |       | 4             | 2                          | 10.92%                         |
|       | Seq Charge ObservedMS                                                |                          |       | ExpectedMS    | CalculatedMS               | Pepscore PepHits               |
|       | MSDILAEGITIVEDINK                                                    |                          | +3    | 620.9976      | 1859.9708                  | 1859.9550 0.02 48 2            |
|       | LTTDKANIK                                                            |                          | +2    | 502.2964      | 1002.5783                  | 1002.5709 0.01 47 1            |
|       | KGPEDTAQLAHAVLAK                                                     |                          | +2    | 824.9622      | 1647.9098                  | 1647.8944 0.02 63 7            |
|       | ATEGKWEVLIGSSHILTPTR                                                 |                          | +3    | 732.4061      | 2194.1964                  | 2194.1746 0.02 44 1            |
| 716.  | IPI00358099                                                          | Y N                      | 0.34  | 1             | 2 0                        | 22 0                           |
| *Des: | PREDICTED: similar to actin alpha 1 skeletal muscle protein          |                          |       |               |                            |                                |
|       | SEQUEST:(PepMatched Observed.Hits Coverage)                          |                          |       | 2             | 1                          | 8.13%                          |
|       | Seq Charge Xcor Delta                                                |                          |       | Probility     | PepHits                    |                                |
|       | MGQKDSYVGDEAQSQR                                                     |                          | +3    | 5.685         | 0.499                      | 1.0000 20                      |
|       | MGQKDSYVGDEAQS                                                       |                          | +3    | 3.757         | 0.509                      | 1.0000 6                       |
|       | MASCOT:(PepMatched Observed.Hits Coverage)                           |                          |       |               |                            |                                |
| 717.  | IPI00204046                                                          | Y N                      | 0.06  | 3             | 8 0                        | 33 0                           |
| *Des: | Myosin heavy chain, nonmuscle type B                                 |                          |       |               |                            |                                |
|       | SEQUEST:(PepMatched Observed.Hits Coverage)                          |                          |       | 8             | 9                          | 3.18%                          |
|       | Seq Charge Xcor Delta                                                |                          |       | Probility     | PepHits                    |                                |
|       | FDQLLAEEK                                                            |                          | +2    | 2.735         | 0.328                      | 0.9950 2                       |
|       | ADEWLK                                                               |                          | +2    | 3.099         | 0.250                      | 0.9965 3                       |
|       | VDYKADEWLK                                                           |                          | +3    | 3.269         | 0.285                      | 0.9983 6                       |
|       | AGVLAHLEER                                                           |                          | +2    | 3.595         | 0.478                      | 1.0000 3                       |
|       | LDPHLVLDQLR                                                          |                          | +3    | 2.761         | 0.379                      | 0.9998 8                       |
|       | VIQYLAHVASSHK                                                        |                          | +2    | 4.515         | 0.587                      | 1.0000 22                      |
|       | KVIQYLAHVASSHK                                                       |                          | +2    | 4.599         | 0.520                      | 1.0000 12                      |
|       | AGKLDPHLVLDQLR                                                       |                          | +2    | 4.228         | 0.517                      | 1.0000 9                       |
|       | MASCOT:(PepMatched Observed.Hits Coverage)                           |                          |       |               |                            |                                |
| 718.  | IPI00201713                                                          | Y Y                      | 0.15  | 1             | 3 4                        | 4 14                           |
| *Des: | Splice Isoform B of Adapter-related protein complex 1 beta 1 subunit |                          |       |               |                            |                                |
|       | SEQUEST:(PepMatched Observed.Hits Coverage)                          |                          |       | 3             | 1                          | 7.41%                          |
|       | Seq Charge Xcor Delta                                                |                          |       | Probility     | PepHits                    |                                |
|       | LASQANIAQVLAELK                                                      |                          | +2    | 3.677         | 0.534                      | 0.9999 2                       |

Identified Human Platelet Proteins

| Seq                                                  | Charge | ObservedMS | ExpectedMS | CalculatedMS | PepScore | PepHits |
|------------------------------------------------------|--------|------------|------------|--------------|----------|---------|
| LGAPVSSGLSDLFDLTSGVGTLSGSYVAPK                       | +3     | 2.939      | 0.413      | 0.9992       | 2        |         |
| NNIDVVFYFSTLYPLHVLVFDGK                              | +3     | 3.847      | 0.504      | 1.0000       | 1        |         |
| MASCOT:(PepMatched Observed.Hits Coverage) 4 1 8.76% |        |            |            |              |          |         |
| LTNGIWVLAELR                                         | +2     | 692.37     | 1382.72    | 1383.79      | -1.06    | 44      |
| NNIDVVFYFSTLYPLHVLVFDGK                              | +3     | 910.80     | 2729.38    | 2729.37      | 0.01     | 51      |
| LGAPVSSGLSDLFDLTSGVGTLSGSYVAPK                       | +3     | 965.84     | 2894.50    | 2894.49      | 0.01     | 44      |
| LASQANIAQVLAELK                                      | +3     | 523.64     | 1567.90    | 1567.89      | 0.01     | 61      |

No. 719. Protein IPI00211336 Matched (SEQUEST MASCOT) N Y emPAI Strategy.Hits 2.76 1 0 4 0 12 PepMatched(SEQUEST MASCOT) SpectraMatched(SEQUEST MASCOT)

\*Des: PREDICTED: similar to SH3 domain binding glutamic acid-rich protein-like 3

SEQUEST:(PepMatched Observed.Hits Coverage)

| Seq                                                   | Charge | ObservedMS | ExpectedMS | CalculatedMS | PepScore | PepHits |
|-------------------------------------------------------|--------|------------|------------|--------------|----------|---------|
| MASCOT:(PepMatched Observed.Hits Coverage) 4 2 46.31% |        |            |            |              |          |         |
| VYSTSVTGSR                                            | +2     | 528.7722   | 1055.5299  | 1055.5247    | 0.01     | 68      |
| IQYQLVDISQDNALRDEMRR                                  | +3     | 769.7202   | 2306.1388  | 2306.1324    | 0.01     | 45      |
| RIQYQLVDISQDNALRDEMRR                                 | +3     | 821.7519   | 2462.2338  | 2462.2336    | 0        | 41      |
| EIKSQQSEVTR                                           | +2     | 652.8442   | 1303.6739  | 1303.6732    | 0        | 49      |

No. 720. Protein IPI00200773 Matched (SEQUEST MASCOT) Y N emPAI Strategy.Hits 0.07 3 5 0 29 0 PepMatched(SEQUEST MASCOT) SpectraMatched(SEQUEST MASCOT)

\*Des: Skeletal muscle-specific alpha-actinin 3

SEQUEST:(PepMatched Observed.Hits Coverage) 5 7 7.65%

| Seq            | Charge | Xcor  | Delta | Probability | PepHits |
|----------------|--------|-------|-------|-------------|---------|
| FAIQDISVEETSAK | +2     | 4.215 | 0.537 | 1.0000      | 3       |
| AGTQIENIEEDFR  | +2     | 3.210 | 0.442 | 0.9994      | 1       |
| HEAFESDLAAHQDR | +3     | 3.849 | 0.388 | 0.9998      | 1       |
| LMLLLEVISGER   | +2     | 3.877 | 0.374 | 0.9996      | 6       |
| MTLGMWITIILR   | +2     | 4.935 | 0.521 | 1.0000      | 8       |

MASCOT:(PepMatched Observed.Hits Coverage)

No. 721. Protein IPI00200847 Matched (SEQUEST MASCOT) Y Y emPAI Strategy.Hits 0.17 2 5 6 7 11 PepMatched(SEQUEST MASCOT) SpectraMatched(SEQUEST MASCOT)

\*Des: T-complex protein 1, alpha subunit

SEQUEST:(PepMatched Observed.Hits Coverage) 5 2 13.07%

| Seq                  | Charge | Xcor  | Delta | Probability | PepHits |
|----------------------|--------|-------|-------|-------------|---------|
| ICDDELILIK           | +2     | 2.908 | 0.342 | 0.9965      | 1       |
| MLVDDIGDVTITNDGATILK | +2     | 5.452 | 0.568 | 1.0000      | 2       |
| FATEAAITILR          | +2     | 3.030 | 0.420 | 0.9989      | 1       |
| SQNVMAAASIANIVK      | +2     | 3.967 | 0.324 | 0.9981      | 1       |
| AFHNEAQVNPERK        | +3     | 3.972 | 0.371 | 1.0000      | 5       |

MASCOT:(PepMatched Observed.Hits Coverage) 6 3 14.48%

| Seq         | Charge | ObservedMS | ExpectedMS | CalculatedMS | PepScore | PepHits |
|-------------|--------|------------|------------|--------------|----------|---------|
| ICDDELILIK  | +2     | 587.8248   | 1173.6350  | 1173.6315    | 0        | 53      |
| EQLAIAEFAR  | +2     | 574.3136   | 1146.6126  | 1146.6033    | 0.01     | 44      |
| FATEAAITILR | +2     | 603.3526   | 1204.6906  | 1204.6815    | 0.01     | 42      |

Identified Human Platelet Proteins

|                   |          |           |           |           |      |    |   |
|-------------------|----------|-----------|-----------|-----------|------|----|---|
| LGQVVITDPEKLDQIR  | +3       | 641.7086  | 1922.1040 | 1922.0836 | 0.02 | 52 | 1 |
| SQNVMAAASIANIVK+2 | 758.9182 | 1515.8219 | 1515.8078 | 0.01      | 68   | 1  |   |
| AFHNEAQVNPERK +2  | 770.3968 | 1538.7790 | 1538.7589 | 0.02      | 54   | 4  |   |

|       |                                                               |                          |            |               |                            |                                |          |         |
|-------|---------------------------------------------------------------|--------------------------|------------|---------------|----------------------------|--------------------------------|----------|---------|
| No.   | Protein                                                       | Matched (SEQUEST MASCOT) | emPAI      | Strategy.Hits | PepMatched(SEQUEST MASCOT) | SpectraMatched(SEQUEST MASCOT) |          |         |
| 722.  | IPI00365600                                                   | Y Y                      | 0.62       | 2             | 8 9 20                     | 26                             |          |         |
| *Des: | cAMP-dependent protein kinase type II-beta regulatory subunit |                          |            |               |                            |                                |          |         |
|       | SEQUEST:(PepMatched Observed.Hits Coverage)                   |                          | 8          | 4             | 31.04%                     |                                |          |         |
|       | Seq                                                           | Charge                   | Xcor       | Delta         | Proability                 | PepHits                        |          |         |
|       | SDIEENGAVEIAR                                                 | +2                       |            | 4.235         | 0.449                      | 0.9999                         | 4        |         |
|       | GVNFAEPMR                                                     | +2                       |            | 3.002         | 0.249                      | 0.9869                         | 3        |         |
|       | EGEVIDQGGDDGNFYVIDR                                           | +3                       |            | 4.773         | 0.571                      | 1.0000                         | 1        |         |
|       | AATITATSPGALWGLDR                                             | +2                       |            | 4.462         | 0.598                      | 1.0000                         | 1        |         |
|       | KMYESFIESLPFLK +2                                             | 4.000                    |            | 0.430         | 0.9998                     | 2                              |          |         |
|       | HQPADLLEFALQHFTR                                              | +3                       |            | 5.275         | 0.517                      | 1.0000                         | 4        |         |
|       | NLDPEQMSQVLDAMFEK                                             | +2                       |            | 5.478         | 0.616                      | 1.0000                         | 2        |         |
|       | TWGDAGAAAGGGTPSK                                              | +2                       |            | 3.700         | 0.367                      | 0.9990                         | 1        |         |
|       | MASCOT:(PepMatched Observed.Hits Coverage)                    |                          | 9          | 4             | 34.83%                     |                                |          |         |
|       | Seq                                                           | Charge                   | ObservedMS | ExpectedMS    | CalculatedMS               |                                | PepScore | PepHits |
|       | SDIEENGAVEIAR                                                 | +2                       | 701.85     | 1401.68       | 1401.67                    | 0.01                           | 70       | 4       |
|       | TWGDAGAAAGGGTPSK                                              | +2                       | 702.34     | 1402.66       | 1402.65                    | 0.01                           | 61       | 1       |
|       | GVNFAEPMR                                                     | +2                       | 575.27     | 1148.53       | 1148.53                    | 0                              | 50       | 3       |
|       | EGEVIDQGGDDGNFYVIDR                                           | +3                       | 765.01     | 2292.00       | 2291.99                    | 0.01                           | 48       | 1       |
|       | GQYFGELALVTNKPR                                               | +2                       | 846.86     | 1691.70       | 1691.90                    | -0.19                          | 87       | 4       |
|       | AATITATSPGALWGLDR                                             | +2                       | 850.96     | 1699.90       | 1699.89                    | 0.01                           | 73       | 1       |
|       | KMYESFIESLPFLK +2                                             | 866.46                   | 1730.91    | 1730.90       | 0.01                       | 74                             | 1        |         |
|       | HQPADLLEFALQHFTR                                              | +3                       | 641.67     | 1921.98       | 1921.98                    | 0                              | 66       | 4       |
|       | NLDPEQMSQVLDAMFEK                                             | +2                       | 997.97     | 1993.92       | 1993.91                    | 0.01                           | 91       | 2       |

|       |                                             |                          |            |               |                            |                                |          |         |
|-------|---------------------------------------------|--------------------------|------------|---------------|----------------------------|--------------------------------|----------|---------|
| No.   | Protein                                     | Matched (SEQUEST MASCOT) | emPAI      | Strategy.Hits | PepMatched(SEQUEST MASCOT) | SpectraMatched(SEQUEST MASCOT) |          |         |
| 723.  | IPI00561192                                 | N Y                      | 0.79       | 1             | 0 8 0                      | 93                             |          |         |
| *Des: | 57 kDa protein                              |                          |            |               |                            |                                |          |         |
|       | SEQUEST:(PepMatched Observed.Hits Coverage) |                          | 8          | 1             | 23.61%                     |                                |          |         |
|       | MASCOT:(PepMatched Observed.Hits Coverage)  |                          | 8          | 1             | 23.61%                     |                                |          |         |
|       | Seq                                         | Charge                   | ObservedMS | ExpectedMS    | CalculatedMS               |                                | PepScore | PepHits |
|       | QSVAVNESCGK                                 | +2                       | 561.2704   | 1120.5263     | 1120.5182                  | 0.01                           | 67       | 18      |
|       | VNPFPRGDESPVAAGAQR                          | +2                       | 977.9990   | 1953.9834     | 1953.9656                  | 0.02                           | 94       | 38      |
|       | QHPLPPPAQNQNQVR                             | +3                       | 575.3083   | 1722.9030     | 1722.8914                  | 0.01                           | 75       | 31      |
|       | VVALDKNFHMK                                 | +2                       | 651.3597   | 1300.7049     | 1300.6961                  | 0.01                           | 72       | 23      |
|       | FSPGAPSGPGQPSQK                             | +2                       | 769.8878   | 1537.7610     | 1537.7525                  | 0.01                           | 49       | 8       |
|       | GPLSQAPTPAPK                                | +2                       | 582.3276   | 1162.6407     | 1162.6346                  | 0.01                           | 60       | 6       |
|       | FAPVVAPKPK                                  | +2                       | 526.4513   | 1050.8880     | 1052.6382                  | -1.74                          | 53       | 14      |
|       | SVPLEAPSSVGTGSPQPPSFTYAQQK                  | +3                       | 887.4490   | 2659.3251     | 2659.3129                  | 0.01                           | 42       | 1       |

|       |                                                  |                          |       |               |                            |                                |  |  |
|-------|--------------------------------------------------|--------------------------|-------|---------------|----------------------------|--------------------------------|--|--|
| No.   | Protein                                          | Matched (SEQUEST MASCOT) | emPAI | Strategy.Hits | PepMatched(SEQUEST MASCOT) | SpectraMatched(SEQUEST MASCOT) |  |  |
| 724.  | IPI00471525                                      | N Y                      | 0.23  | 2             | 0 8 0                      | 47                             |  |  |
| *Des: | Eukaryotic translation elongation factor 1 delta |                          |       |               |                            |                                |  |  |

Identified Human Platelet Proteins

SEQUEST:(PepMatched Observed.Hits Coverage)

| MASCOT:(PepMatched Observed.Hits Coverage) |        | 8          | 3          | 18.12%       |      |    |          |         |  |
|--------------------------------------------|--------|------------|------------|--------------|------|----|----------|---------|--|
| Seq                                        | Charge | ObservedMS | ExpectedMS | CalculatedMS |      |    | PepScore | PepHits |  |
| QENGASVILR                                 | +2     | 544.30     | 1086.58    | 1085.58      | 1    | 60 | 8        |         |  |
| FYEQMNGPVTAGSR                             | +2     | 778.87     | 1555.72    | 1555.71      | 0.01 | 82 | 9        |         |  |
| SLAGSSGPGASSGPGGDHSDLIVR                   | +3     | 727.69     | 2180.06    | 2180.05      | 0.01 | 58 | 8        |         |  |
| IASLEVENQNLNLR                             | +2     | 693.38     | 1384.74    | 1384.73      | 0.01 | 85 | 6        |         |  |
| FEEHVQSVDIAAFNK                            | +2     | 867.44     | 1732.86    | 1732.84      | 0.02 | 80 | 6        |         |  |
| GVVQDLQQAISK                               | +2     | 643.36     | 1284.71    | 1284.70      | 0.01 | 71 | 30       |         |  |
| VGTDLLEEEITK                               | +2     | 673.86     | 1345.71    | 1345.70      | 0.01 | 64 | 6        |         |  |
| SIQLDGLVWGASK                              | +2     | 687.38     | 1372.75    | 1372.74      | 0.01 | 89 | 9        |         |  |

No. 725. Protein IPI00324019 Matched (SEQUEST MASCOT) Y Y emPAI 0.5 Strategy.Hits 1 PepMatched (SEQUEST MASCOT) 4 4 SpectraMatched (SEQUEST MASCOT) 7 10

\*Des: Alpha-1-antiproteinase precursor

| SEQUEST:(PepMatched Observed.Hits Coverage) |        | 4          | 2          | 17.94%       |         |     |          |         |  |
|---------------------------------------------|--------|------------|------------|--------------|---------|-----|----------|---------|--|
| Seq                                         | Charge | Xcor       | Delta      | Probability  | PepHits |     |          |         |  |
| VFNNADLSGITEDAPLK                           | +2     | 5.437      | 0.626      | 1.0000       | 1       |     |          |         |  |
| ISSNLADFAFSLYR                              | +2     | 4.129      | 0.485      | 0.9999       | 2       |     |          |         |  |
| FDHPFIFMIVESETQSPLFVGK                      | +3     | 4.303      | 0.496      | 0.9999       | 2       |     |          |         |  |
| QLDEDTV FALVNYIFFK                          | +2     | 5.138      | 0.600      | 1.0000       | 2       |     |          |         |  |
| MASCOT:(PepMatched Observed.Hits Coverage)  |        | 4          | 2          | 14.59%       |         |     |          |         |  |
| Seq                                         | Charge | ObservedMS | ExpectedMS | CalculatedMS |         |     | PepScore | PepHits |  |
| VFNNADLSGITEDAPLK                           | +2     | 959.98     | 1917.94    | 1917.93      | 0.01    | 102 | 2        |         |  |
| SAILYFPK                                    | +2     | 469.77     | 937.53     | 937.53       | 0       | 54  | 2        |         |  |
| ISSNLADFAFSLYR                              | +2     | 802.41     | 1602.82    | 1602.80      | 0.02    | 68  | 4        |         |  |
| QLDEDTV FALVNYIFFK                          | +3     | 688.02     | 2061.05    | 2061.05      | 0       | 76  | 2        |         |  |

No. 726. Protein IPI00365531 Matched (SEQUEST MASCOT) Y Y emPAI 0.77 Strategy.Hits 1 7 PepMatched (SEQUEST MASCOT) 6 10 SpectraMatched (SEQUEST MASCOT) 9

\*Des: PREDICTED: similar to DNA segment, Chr 12, ERATO Doi 553, expressed

| SEQUEST:(PepMatched Observed.Hits Coverage) |        | 7          | 1          | 37.99%       |         |    |          |         |  |
|---------------------------------------------|--------|------------|------------|--------------|---------|----|----------|---------|--|
| Seq                                         | Charge | Xcor       | Delta      | Probability  | PepHits |    |          |         |  |
| DAIQNPNDIQLQEK                              | +2     | 3.691      | 0.376      | 0.9983       | 1       |    |          |         |  |
| TLSNATMHFVSENK                              | +2     | 3.314      | 0.343      | 0.9953       | 1       |    |          |         |  |
| NPAIQNDFSYYR                                | +2     | 3.519      | 0.414      | 0.9991       | 1       |    |          |         |  |
| INNMHLDIENEVNNEMANR                         | +3     | 3.929      | 0.440      | 0.9997       | 2       |    |          |         |  |
| MSLFYAEATPMLK                               | +2     | 3.062      | 0.383      | 0.9964       | 2       |    |          |         |  |
| EIENYPHFLLDFENAQPTGER                       | +3     | 3.883      | 0.423      | 0.9995       | 2       |    |          |         |  |
| EIWNQISAVLQDSESILSDLQAYK                    | +2     | 5.691      | 0.644      | 1.0000       | 2       |    |          |         |  |
| MASCOT:(PepMatched Observed.Hits Coverage)  |        | 6          | 1          | 30.39%       |         |    |          |         |  |
| Seq                                         | Charge | ObservedMS | ExpectedMS | CalculatedMS |         |    | PepScore | PepHits |  |
| DAIQNPNDIQLQEK                              | +2     | 813.41     | 1624.81    | 1624.81      | 0       | 65 | 1        |         |  |
| TLSNATMHFVSENK                              | +2     | 789.88     | 1577.75    | 1577.75      | 0       | 43 | 2        |         |  |
| NPAIQNDFSYYR                                | +2     | 744.35     | 1486.69    | 1486.68      | 0.01    | 68 | 2        |         |  |
| INNMHLDIENEVNNEMANR                         | +3     | 757.35     | 2269.02    | 2269.02      | 0       | 41 | 4        |         |  |
| EFAEILHFTRLR                                | +2     | 688.38     | 1374.74    | 1374.73      | 0.01    | 51 | 1        |         |  |

Identified Human Platelet Proteins

EIWNQISAVLQDSESILSDLQAYK +3 917.47 2749.39 2749.38 0.01 69 1

No. 727. Protein IPI00365460 Matched (SEQUEST MASCOT) N Y emPAI 0.52 Strategy.Hits 1 PepMatched(SEQUEST MASCOT) 0 SpectraMatched(SEQUEST MASCOT) 2  
 \*Des: PREDICTED: similar to ubiquitin-conjugating enzyme E2M  
 SEQUEST:(PepMatched Observed.Hits Coverage) 2 1 11.22%  
 MASCOT:(PepMatched Observed.Hits Coverage) 2 1 11.22%  

| Seq         | Charge | ObservedMS | ExpectedMS | CalculatedMS | PepScore | PepHits |
|-------------|--------|------------|------------|--------------|----------|---------|
| LFEQNVQR    | +2     | 518.2332   | 1034.4519  | 1032.5352    | 1.92     | 51      |
| VGQGYPHDPPK | +2     | 597.8059   | 1193.5973  | 1193.5829    | 0.01     | 46      |

No. 728. Protein IPI00358316 Matched (SEQUEST MASCOT) N Y emPAI 0.12 Strategy.Hits 1 PepMatched(SEQUEST MASCOT) 0 SpectraMatched(SEQUEST MASCOT) 2  
 \*Des: PREDICTED: similar to Myotubularin-related protein 7  
 SEQUEST:(PepMatched Observed.Hits Coverage) 2 1 3.27%  
 MASCOT:(PepMatched Observed.Hits Coverage) 2 1 3.27%  

| Seq         | Charge | ObservedMS | ExpectedMS | CalculatedMS | PepScore | PepHits |
|-------------|--------|------------|------------|--------------|----------|---------|
| ADYLNPLFR   | +2     | 554.79     | 1107.56    | 1107.57      | 0        | 43      |
| AIMDAGIFIAK | +2     | 575.32     | 1148.63    | 1148.63      | 0        | 46      |

No. 729. Protein IPI00363930 Matched (SEQUEST MASCOT) Y Y emPAI 0.29 Strategy.Hits 3 PepMatched(SEQUEST MASCOT) 4 SpectraMatched(SEQUEST MASCOT) 5  
 \*Des: PREDICTED: similar to SEPT11 protein  
 SEQUEST:(PepMatched Observed.Hits Coverage) 4 4 9.04%  

| Seq                  | Charge | Xcor  | Delta | Probability | PepHits |
|----------------------|--------|-------|-------|-------------|---------|
| SYELQESNVR           | +2     | 3.010 | 0.445 | 0.9993      | 3       |
| AAAQLLQSQAQQSGAQQTK  | +2     | 6.020 | 0.607 | 1.0000      | 2       |
| KAAAQLLQSQAQQSGAQQTK | +3     | 5.937 | 0.357 | 1.0000      | 2       |
| AAAQLLQSQAQQSGAQQTKK | +3     | 3.279 | 0.392 | 0.9999      | 2       |

 MASCOT:(PepMatched Observed.Hits Coverage) 5 5 10.4%  

| Seq                  | Charge | ObservedMS | ExpectedMS | CalculatedMS | PepScore | PepHits |
|----------------------|--------|------------|------------|--------------|----------|---------|
| VNMEDLR              | +2     | 438.7179   | 875.4213   | 875.4171     | 0        | 50      |
| SYELQESNVR           | +2     | 612.8006   | 1223.5866  | 1223.5782    | 0.01     | 44      |
| AAAQLLQSQAQQSGAQQTK  | +2     | 979.0156   | 1956.0167  | 1956.0024    | 0.01     | 104     |
| AAAQLLQSQAQQSGAQQTKK | +3     | 695.7108   | 2084.1104  | 2084.0974    | 0.01     | 57      |
| KAAAQLLQSQAQQSGAQQTK | +3     | 695.7135   | 2084.1187  | 2084.0974    | 0.02     | 70      |

No. 730. Protein IPI00359982 Matched (SEQUEST MASCOT) Y Y emPAI 0.07 Strategy.Hits 1 PepMatched(SEQUEST MASCOT) 3 SpectraMatched(SEQUEST MASCOT) 3  
 \*Des: PREDICTED: similar to Early endosome antigen 1  
 SEQUEST:(PepMatched Observed.Hits Coverage) 3 1 2.73%  

| Seq              | Charge | Xcor  | Delta | Probability | PepHits |
|------------------|--------|-------|-------|-------------|---------|
| LQQQAAQAAQELAVEK | +2     | 5.656 | 0.636 | 1.0000      | 1       |
| LALAQEDLISNR     | +2     | 2.808 | 0.297 | 0.9783      | 1       |
| AAQLATEIADIK     | +2     | 2.861 | 0.303 | 0.9889      | 1       |

 MASCOT:(PepMatched Observed.Hits Coverage) 3 1 2.6%  

| Seq | Charge | ObservedMS | ExpectedMS | CalculatedMS | PepScore | PepHits |
|-----|--------|------------|------------|--------------|----------|---------|
|-----|--------|------------|------------|--------------|----------|---------|

Identified Human Platelet Proteins

|                  |    |        |         |         |      |     |   |
|------------------|----|--------|---------|---------|------|-----|---|
| LQQQAAQAAQELAVEK | +2 | 863.47 | 1724.92 | 1724.91 | 0.01 | 116 | 1 |
| AAQLATEIADIK     | +2 | 622.35 | 1242.68 | 1242.68 | 0    | 59  | 1 |
| IQNLEALLQK       | +2 | 585.35 | 1168.68 | 1168.68 | 0    | 47  | 1 |

No. 731. Protein IPI00231734 Matched (SEQUEST MASCOT) Y Y emPAI 0.87 Strategy.Hits 4 PepMatched(SEQUEST MASCOT) 7 SpectraMatched(SEQUEST MASCOT) 11 26 73

\*Des: Fructose-bisphosphate aldolase A

|                                             |        |       |       |            |         |                |
|---------------------------------------------|--------|-------|-------|------------|---------|----------------|
| SEQUEST:(PepMatched Observed.Hits Coverage) |        | 7     | 3     | 26.48%     |         |                |
| Seq                                         | Charge | Xcor  | Delta | Proability | PepHits |                |
| VDKGVVPLAGTNGETTTQGLDGLSER                  |        |       |       | +3         | 4.172   | 0.465 1.0000 2 |
| GGVVGKVDKGVVPLAGTNGETTTQGLDGLSER            |        |       |       | +3         | 6.674   | 0.576 1.0000 2 |
| YTPSGQSGAAASESLFISNHAY                      | +2     |       | 5.548 | 0.665      | 1.0000  | 8              |
| KELADIAHR                                   | +2     | 2.797 | 0.350 | 0.9993     | 6       |                |
| FSNEEIAMATVTALRR                            | +2     | 2.959 | 0.243 | 0.9914     | 11      |                |
| YTPSGQSGAAASESLFISNHA                       | +2     | 5.589 | 0.637 | 1.0000     | 5       |                |
| ENLKAAQEEYIKR                               | +3     | 3.492 | 0.398 | 1.0000     | 14      |                |

|                                            |        |            |            |              |       |                  |
|--------------------------------------------|--------|------------|------------|--------------|-------|------------------|
| MASCOT:(PepMatched Observed.Hits Coverage) |        | 11         | 8          | 33.24%       |       |                  |
| Seq                                        | Charge | ObservedMS | ExpectedMS | CalculatedMS |       | Pepscore PepHits |
| GILAADESTGSIK                              | +2     | 666.8596   | 1331.7046  | 1331.6932    | 0.01  | 83 8             |
| ELADIAHR                                   | +2     | 462.7511   | 923.4877   | 923.4825     | 0.01  | 48 3             |
| GILAADESTGSIKR                             | +2     | 744.9116   | 1487.8087  | 1487.7943    | 0.01  | 107 13           |
| FSNEEIAMATVTALR                            | +2     | 826.9241   | 1651.8336  | 1651.8239    | 0.01  | 83 1             |
| AAQEEYIKR                                  | +2     | 554.2971   | 1106.5796  | 1106.5720    | 0.01  | 69 4             |
| ALQASALK                                   | +2     | 402.2093   | 802.4040   | 800.4756     | 1.93  | 43 4             |
| ALANSLACQGK                                | +2     | 538.2852   | 1074.5559  | 1074.5491    | 0.01  | 74 4             |
| RLQSIGTENTEENRR                            | +2     | 901.9678   | 1801.9210  | 1801.9030    | 0.02  | 46 5             |
| KELADIAHR                                  | +2     | 526.7999   | 1051.5852  | 1051.5774    | 0.01  | 68 3             |
| IGEHTPSSLAIMENANVLAR                       | +2     | 1062.0568  | 2122.0990  | 2122.0840    | 0.02  | 88 3             |
| SKGGVVGKVDK                                | +2     | 593.3029   | 1184.5912  | 1185.7080    | -1.11 | 53 3             |

No. 732. Protein IPI00189981 Matched (SEQUEST MASCOT) Y Y emPAI 0.29 Strategy.Hits 1 PepMatched(SEQUEST MASCOT) 2 SpectraMatched(SEQUEST MASCOT) 4 3 5

\*Des: Prothrombin precursor

|                                             |        |            |            |              |         |                  |
|---------------------------------------------|--------|------------|------------|--------------|---------|------------------|
| SEQUEST:(PepMatched Observed.Hits Coverage) |        | 2          | 1          | 3.66%        |         |                  |
| Seq                                         | Charge | Xcor       | Delta      | Proability   | PepHits |                  |
| QTVTSLQAGYK                                 | +2     | 3.459      | 0.506      | 0.9999       | 2       |                  |
| YGFYTHVFR                                   | +2     | 2.982      | 0.469      | 0.9997       | 2       |                  |
| MASCOT:(PepMatched Observed.Hits Coverage)  |        | 4          | 1          | 7.48%        |         |                  |
| Seq                                         | Charge | ObservedMS | ExpectedMS | CalculatedMS |         | Pepscore PepHits |
| YQNFDPEVK                                   | +2     | 570.27     | 1138.53    | 1138.53      | 0       | 45 2             |
| YGFYTHVFR                                   | +2     | 595.30     | 1188.58    | 1188.57      | 0.01    | 59 2             |
| QTVTSLQAGYK                                 | +2     | 654.87     | 1307.72    | 1307.71      | 0.01    | 69 2             |
| TTDAEFHTFFDER                               | +2     | 808.36     | 1614.70    | 1614.70      | 0       | 51 2             |

No. 733. Protein IPI00231662 Matched (SEQUEST MASCOT) Y Y emPAI 2.17 Strategy.Hits 1 PepMatched(SEQUEST MASCOT) 7 SpectraMatched(SEQUEST MASCOT) 6 14 11

\*Des: NADH-cytochrome b5 reductase

Identified Human Platelet Proteins

| SEQUEST:(PepMatched Observed.Hits Coverage) |        | 7          | 1          | 40.32%       |                  |
|---------------------------------------------|--------|------------|------------|--------------|------------------|
| Seq                                         | Charge | Xcor       | Delta      | Proability   | PepHits          |
| GPNGLLVYQGK                                 | +2     | 3.416      | 0.472      | 0.9996       | 3                |
| SSPAITLENPDIK                               | +2     | 3.514      | 0.407      | 0.9988       | 1                |
| APDAWDYSQGFVNEEMIR                          | +2     | 5.412      | 0.611      | 1.0000       | 2                |
| MSQYLENMNIGDTIEFR                           | +2     | 5.473      | 0.626      | 1.0000       | 2                |
| SVGMIAGGTGITPMLQVIR                         | +2     | 4.646      | 0.526      | 1.0000       | 4                |
| FALPSPQHILGLPIGQHIYLSTR                     | +3     | 5.043      | 0.505      | 0.9999       | 1                |
| VVLSPVWFVYSLFMK                             | +3     | 4.702      | 0.540      | 1.0000       | 2                |
| MASCOT:(PepMatched Observed.Hits Coverage)  |        | 6          | 1          | 32.45%       |                  |
| Seq                                         | Charge | ObservedMS | ExpectedMS | CalculatedMS | Pepscore PepHits |
| LIDKEIISHDTR                                | +2     | 720.40     | 1438.78    | 1438.78      | 0 56 1           |
| GPNGLLVYQGK                                 | +2     | 573.32     | 1144.63    | 1144.62      | 0.01 68 7        |
| SSPAITLENPDIK                               | +2     | 692.87     | 1383.73    | 1383.72      | 0.01 69 1        |
| SVGMIAGGTGITPMLQVIR                         | +2     | 951.02     | 1900.03    | 1900.03      | 0 84 4           |
| FALPSPQHILGLPIGQHIYLSTR                     | +3     | 853.48     | 2557.43    | 2557.42      | 0.01 60 1        |
| VVLSPVWFVYSLFMK                             | +2     | 908.01     | 1814.00    | 1813.98      | 0.02 95 2        |

No. 734. Protein IPI00231736 Matched (SEQUEST MASCOT) Y Y emPAI 0.19 Strategy.Hits 1 PepMatched(SEQUEST MASCOT) 2 SpectraMatched(SEQUEST MASCOT) 3 7

\*Des: Fructose-bisphosphate aldolase C

| SEQUEST:(PepMatched Observed.Hits Coverage) |        | 2          | 1          | 8.1%         |                  |
|---------------------------------------------|--------|------------|------------|--------------|------------------|
| Seq                                         | Charge | Xcor       | Delta      | Proability   | PepHits          |
| DNAGAATEEFIK                                | +2     | 3.169      | 0.400      | 0.9989       | 2                |
| TPSALAILENANVLAR                            | +2     | 4.271      | 0.450      | 0.9998       | 1                |
| MASCOT:(PepMatched Observed.Hits Coverage)  |        | 2          | 1          | 9.18%        |                  |
| Seq                                         | Charge | ObservedMS | ExpectedMS | CalculatedMS | Pepscore PepHits |
| DNAGAATEEFIK                                | +2     | 633.31     | 1264.60    | 1264.59      | 0.01 53 6        |
| ISDRTPSALAILENANVLAR                        | +3     | 708.37     | 2122.10    | 2123.17      | -1.06 47 1       |

No. 735. Protein IPI00358175 Matched (SEQUEST MASCOT) Y N emPAI 0.02 Strategy.Hits 1 PepMatched(SEQUEST MASCOT) 3 SpectraMatched(SEQUEST MASCOT) 29 0

\*Des: PREDICTED: similar to gamma-filamin

| SEQUEST:(PepMatched Observed.Hits Coverage) |        | 3     | 1     | 1.11%      |         |
|---------------------------------------------|--------|-------|-------|------------|---------|
| Seq                                         | Charge | Xcor  | Delta | Proability | PepHits |
| LIALLEVLSQK                                 | +2     | 3.517 | 0.423 | 0.9995     | 78      |
| KIQQNTFTR                                   | +2     | 2.752 | 0.254 | 0.9862     | 5       |
| LLGWIQNK                                    | +2     | 3.020 | 0.166 | 0.9800     | 4       |
| MASCOT:(PepMatched Observed.Hits Coverage)  |        | 3     | 1     | 7.91%      |         |

No. 736. Protein IPI00372829 Matched (SEQUEST MASCOT) Y Y emPAI 0.2 Strategy.Hits 2 PepMatched(SEQUEST MASCOT) 3 SpectraMatched(SEQUEST MASCOT) 4 3

\*Des: PREDICTED: similar to Dendritic cell protein GA17

| SEQUEST:(PepMatched Observed.Hits Coverage) |        | 3     | 2     | 7.91%      |         |
|---------------------------------------------|--------|-------|-------|------------|---------|
| Seq                                         | Charge | Xcor  | Delta | Proability | PepHits |
| VMVELLGSYTEDNASQAR                          | +2     | 4.489 | 0.573 | 1.0000     | 1       |
| LLTFMGMAVENK                                | +2     | 3.248 | 0.491 | 0.9997     | 1       |



Identified Human Platelet Proteins

| No.   | Protein                                                          | Matched (SEQUEST MASCOT) | emPAI      | Strategy.Hits | PepMatched(SEQUEST MASCOT) | SpectraMatched(SEQUEST MASCOT) |     |          |         |  |
|-------|------------------------------------------------------------------|--------------------------|------------|---------------|----------------------------|--------------------------------|-----|----------|---------|--|
| 737.  | IPI00208265                                                      | Y                        | Y          | 0.42          | 3                          | 2                              | 6   | 3        | 23      |  |
| *Des: | Serine/threonine protein phosphatase PP1-alpha catalytic subunit |                          |            |               |                            |                                |     |          |         |  |
|       | SEQUEST:(PepMatched Observed.Hits Coverage)                      | 2                        | 2          | 7.14%         |                            |                                |     |          |         |  |
|       | Seq                                                              | Charge                   | Xcor       | Delta         | Probility                  | PepHits                        |     |          |         |  |
|       | NVQLTENEIR                                                       | +2                       | 2.826      | 0.267         | 0.9876                     | 4                              |     |          |         |  |
|       | YGQFSGLNPGGR                                                     | +2                       | 2.952      | 0.481         | 0.9980                     | 6                              |     |          |         |  |
|       | MASCOT:(PepMatched Observed.Hits Coverage)                       | 6                        | 3          | 25.89%        |                            |                                |     |          |         |  |
|       | Seq                                                              | Charge                   | ObservedMS | ExpectedMS    | CalculatedMS               |                                |     | Pepscore | PepHits |  |
|       | NVQLTENEIR                                                       | +2                       | 608.32     | 1214.63       | 1214.63                    | 0                              | 46  | 2        |         |  |
|       | AHQVVEDGYEFFAK                                                   | +3                       | 547.26     | 1638.77       | 1638.77                    | 0                              | 52  | 8        |         |  |
|       | LNLDSIIGR                                                        | +2                       | 501.74     | 1001.46       | 999.57                     | 1.89                           | 56  | 2        |         |  |
|       | YPENFFLLR                                                        | +2                       | 599.82     | 1197.62       | 1197.62                    | 0                              | 45  | 8        |         |  |
|       | EIFLSQPILLELEAPLK                                                | +2                       | 977.07     | 1952.13       | 1952.12                    | 0.01                           | 79  | 9        |         |  |
|       | LFEYGGFPPESNYLFLGDYVDR                                           | +3                       | 866.75     | 2597.23       | 2597.21                    | 0.02                           | 57  | 6        |         |  |
| 738.  | IPI00213015                                                      | Y                        | Y          | 0.43          | 2                          | 3                              | 3   | 3        | 4       |  |
| *Des: | Dynactin 2                                                       |                          |            |               |                            |                                |     |          |         |  |
|       | SEQUEST:(PepMatched Observed.Hits Coverage)                      | 3                        | 2          | 12.71%        |                            |                                |     |          |         |  |
|       | Seq                                                              | Charge                   | Xcor       | Delta         | Probility                  | PepHits                        |     |          |         |  |
|       | LLHEVQELTTEVEK                                                   | +2                       | 4.624      | 0.412         | 0.9999                     | 2                              |     |          |         |  |
|       | ENLATVEGNFASIDAR                                                 | +2                       | 4.537      | 0.461         | 0.9993                     | 2                              |     |          |         |  |
|       | LLGPDAAINLADPDGALAK                                              | +2                       | 4.970      | 0.523         | 1.0000                     | 1                              |     |          |         |  |
|       | MASCOT:(PepMatched Observed.Hits Coverage)                       | 3                        | 2          | 12.71%        |                            |                                |     |          |         |  |
|       | Seq                                                              | Charge                   | ObservedMS | ExpectedMS    | CalculatedMS               |                                |     | Pepscore | PepHits |  |
|       | LLHEVQELTTEVEK                                                   | +2                       | 834.45     | 1666.89       | 1666.88                    | 0.01                           | 57  | 1        |         |  |
|       | ENLATVEGNFASIDAR                                                 | +2                       | 854.43     | 1706.85       | 1705.83                    | 1.02                           | 83  | 2        |         |  |
|       | LLGPDAAINLADPDGALAK                                              | +2                       | 918.00     | 1833.99       | 1833.98                    | 0.01                           | 85  | 1        |         |  |
| 739.  | IPI00566421                                                      | N                        | Y          | 0.32          | 1                          | 0                              | 2   | 0        | 8       |  |
| *Des: | 75 kDa protein                                                   |                          |            |               |                            |                                |     |          |         |  |
|       | SEQUEST:(PepMatched Observed.Hits Coverage)                      |                          |            |               |                            |                                |     |          |         |  |
|       | MASCOT:(PepMatched Observed.Hits Coverage)                       | 2                        | 1          | 5.24%         |                            |                                |     |          |         |  |
|       | Seq                                                              | Charge                   | ObservedMS | ExpectedMS    | CalculatedMS               |                                |     | Pepscore | PepHits |  |
|       | LMSLDSGLLANL GALTELR                                             | +2                       | 994.0620   | 1986.1095     | 1986.0819                  | 0.03                           | 117 | 9        |         |  |
|       | TLPGDVFAALPQLTR                                                  | +2                       | 799.9623   | 1597.9101     | 1597.8828                  | 0.03                           | 41  | 2        |         |  |
| No.   | Protein                                                          | Matched (SEQUEST MASCOT) | emPAI      | Strategy.Hits | PepMatched(SEQUEST MASCOT) | SpectraMatched(SEQUEST MASCOT) |     |          |         |  |

| Identified Human Platelet Proteins |                                                         |                          |            |               |                            |                                |          |         |   |
|------------------------------------|---------------------------------------------------------|--------------------------|------------|---------------|----------------------------|--------------------------------|----------|---------|---|
| 740.                               | IPI00371957                                             | Y                        | Y          | 0.62          | 1                          | 3                              | 2        | 5       | 4 |
| *Des:                              | PREDICTED: similar to pyrophosphatase                   |                          |            |               |                            |                                |          |         |   |
|                                    | SEQUEST:(PepMatched Observed.Hits Coverage)             |                          |            |               | 3                          | 1                              | 18.7%    |         |   |
|                                    | Seq                                                     | Charge                   | Xcor       | Delta         | Proability                 | PepHits                        |          |         |   |
|                                    | VIAINVDDPDAANYHDISDVER                                  | +3                       |            | 3.591         | 0.404                      | 0.9994                         | 1        |         |   |
|                                    | LKPGYLEATVDWFR                                          | +3                       |            | 3.312         | 0.433                      | 0.9997                         | 3        |         |   |
|                                    | VLGILAMIDEGETDWK                                        | +2                       |            | 5.155         | 0.623                      | 1.0000                         | 3        |         |   |
|                                    | MASCOT:(PepMatched Observed.Hits Coverage)              |                          |            |               | 2                          | 1                              | 13.6%    |         |   |
|                                    | Seq                                                     | Charge                   | ObservedMS | ExpectedMS    | CalculatedMS               |                                | Pepscore | PepHits |   |
|                                    | VIAINVDDPDAANYHDISDVER                                  | +3                       | 814.39     | 2440.16       | 2440.15                    | 0.01                           | 42       | 1       |   |
|                                    | VLGILAMIDEGETDWK                                        | +2                       | 895.46     | 1788.90       | 1788.90                    | 0                              | 92       | 3       |   |
| No.                                | Protein                                                 | Matched (SEQUEST MASCOT) | emPAI      | Strategy.Hits | PepMatched(SEQUEST MASCOT) | SpectraMatched(SEQUEST MASCOT) |          |         |   |
| 741.                               | IPI00370073                                             | N                        | Y          | 0.02          | 1                          | 0                              | 2        | 0       | 2 |
| *Des:                              | Type I keratin KA17                                     |                          |            |               |                            |                                |          |         |   |
|                                    | SEQUEST:(PepMatched Observed.Hits Coverage)             |                          |            |               | 2                          | 1                              | 4.98%    |         |   |
|                                    | MASCOT:(PepMatched Observed.Hits Coverage)              |                          |            |               | 2                          | 1                              | 4.98%    |         |   |
|                                    | Seq                                                     | Charge                   | ObservedMS | ExpectedMS    | CalculatedMS               |                                | Pepscore | PepHits |   |
|                                    | LASYLDKVR                                               | +2                       | 532.8090   | 1063.6035     | 1063.6026                  | 0                              | 40       | 4       |   |
|                                    | TRLEQEIATYR                                             | +2                       | 690.3661   | 1378.7177     | 1378.7204                  | 0                              | 48       | 1       |   |
| No.                                | Protein                                                 | Matched (SEQUEST MASCOT) | emPAI      | Strategy.Hits | PepMatched(SEQUEST MASCOT) | SpectraMatched(SEQUEST MASCOT) |          |         |   |
| 742.                               | IPI00212070                                             | Y                        | N          | 1.03          | 1                          | 4                              | 0        | 13      | 0 |
| *Des:                              | 16 kDa protein                                          |                          |            |               |                            |                                |          |         |   |
|                                    | SEQUEST:(PepMatched Observed.Hits Coverage)             |                          |            |               | 4                          | 3                              | 40.97%   |         |   |
|                                    | Seq                                                     | Charge                   | Xcor       | Delta         | Proability                 | PepHits                        |          |         |   |
|                                    | TNLLQVCER                                               | +2                       | 3.171      | 0.356         | 0.9987                     | 3                              |          |         |   |
|                                    | TNISDEESEQATEMLVHNAQNLMSVK                              | +3                       | 4.966      | 0.551         | 1.0000                     | 7                              |          |         |   |
|                                    | IRTNLLQVCER                                             | +2                       | 2.832      | 0.471         | 0.9963                     | 1                              |          |         |   |
|                                    | TNLLQVCERIPTISTQLK                                      | +2                       | 5.299      | 0.552         | 1.0000                     | 7                              |          |         |   |
|                                    | MASCOT:(PepMatched Observed.Hits Coverage)              |                          |            |               | 4                          | 1                              | 16.43%   |         |   |
| No.                                | Protein                                                 | Matched (SEQUEST MASCOT) | emPAI      | Strategy.Hits | PepMatched(SEQUEST MASCOT) | SpectraMatched(SEQUEST MASCOT) |          |         |   |
| 743.                               | IPI00230868                                             | Y                        | Y          | 0.37          | 1                          | 3                              | 4        | 4       | 7 |
| *Des:                              | Guanine nucleotide bindinG protein, alpha q polypeptide |                          |            |               |                            |                                |          |         |   |
|                                    | SEQUEST:(PepMatched Observed.Hits Coverage)             |                          |            |               | 3                          | 1                              | 13.69%   |         |   |
|                                    | Seq                                                     | Charge                   | Xcor       | Delta         | Proability                 | PepHits                        |          |         |   |
|                                    | VADPSYLPTQQDVLRL                                        | +2                       | 3.953      | 0.395         | 0.9994                     | 2                              |          |         |   |
|                                    | VSAFENPYVDAIK                                           | +2                       | 2.767      | 0.547         | 0.9996                     | 2                              |          |         |   |
|                                    | VPTTGIIYFPDLQSVIFR                                      | +3                       | 4.072      | 0.429         | 0.9999                     | 1                              |          |         |   |
|                                    | MASCOT:(PepMatched Observed.Hits Coverage)              |                          |            |               | 4                          | 1                              | 16.43%   |         |   |
|                                    | Seq                                                     | Charge                   | ObservedMS | ExpectedMS    | CalculatedMS               |                                | Pepscore | PepHits |   |
|                                    | VADPSYLPTQQDVLRL                                        | +2                       | 851.45     | 1700.89       | 1700.87                    | 0.02                           | 47       | 2       |   |
|                                    | DTILQLNLK                                               | +2                       | 529.32     | 1056.63       | 1056.62                    | 0.01                           | 51       | 3       |   |
|                                    | VSAFENPYVDAIK                                           | +2                       | 726.88     | 1451.74       | 1451.73                    | 0.01                           | 62       | 2       |   |
|                                    | VPTTGIIYFPDLQSVIFR                                      | +3                       | 732.40     | 2194.19       | 2194.17                    | 0.02                           | 45       | 1       |   |

**Identified Human Platelet Proteins**

| No.   | Protein                                                          | Matched (SEQUEST MASCOT) | emPAI  | Strategy.Hits | PepMatched(SEQUEST MASCOT) | SpectraMatched(SEQUEST MASCOT) |
|-------|------------------------------------------------------------------|--------------------------|--------|---------------|----------------------------|--------------------------------|
| 744.  | IPI00208197                                                      | Y N                      | 0.26   | 1             | 2                          | 0                              |
| *Des: | [Protein ADP-ribosylarginine] hydrolase                          |                          |        |               |                            |                                |
|       | SEQUEST:(PepMatched Observed.Hits Coverage)                      | 2                        | 1      | 8.67%         |                            |                                |
|       | Seq Charge Xcor Delta Proability PepHits                         |                          |        |               |                            |                                |
|       | AYVTQSGYFVK                                                      | +2                       | 3.126  | 0.443         | 0.9995                     | 3                              |
|       | FPHPSQLDTLIQVSIESGR                                              | +3                       | 3.394  | 0.429         | 0.9997                     | 1                              |
|       | MASCOT:(PepMatched Observed.Hits Coverage)                       |                          |        |               |                            |                                |
| 745.  | IPI00476545                                                      | N Y                      | 0.12   | 1             | 0                          | 3                              |
| *Des: | Ac1262                                                           |                          |        |               |                            |                                |
|       | SEQUEST:(PepMatched Observed.Hits Coverage)                      | 3                        | 1      | 3.39%         |                            |                                |
|       | MASCOT:(PepMatched Observed.Hits Coverage)                       | 3                        | 1      | 3.39%         |                            |                                |
|       | Seq Charge ObservedMS ExpectedMS CalculatedMS Pepscore PepHits   |                          |        |               |                            |                                |
|       | SFSIFS YATK                                                      | +2                       | 575.80 | 1149.58       | 1149.57                    | 0.01 59 15                     |
|       | VFSPNVLNWR                                                       | +2                       | 616.34 | 1230.66       | 1230.65                    | 0.01 46 4                      |
|       | TSFNEILLFWTR                                                     | +2                       | 763.91 | 1525.81       | 1525.79                    | 0.02 44 1                      |
| 746.  | IPI00326561                                                      | Y Y                      | 0.37   | 1             | 2                          | 3                              |
| *Des: | Delta3,5-delta2,4-dienoyl-CoA isomerase, mitochondrial precursor |                          |        |               |                            |                                |
|       | SEQUEST:(PepMatched Observed.Hits Coverage)                      | 2                        | 1      | 9.3%          |                            |                                |
|       | Seq Charge Xcor Delta Proability PepHits                         |                          |        |               |                            |                                |
|       | MMADEALDSGLVSR                                                   | +2                       | 4.263  | 0.537         | 1.0000                     | 2                              |
|       | EVDVGLAADVGT LQR                                                 | +2                       | 4.746  | 0.494         | 0.9999                     | 1                              |
|       | MASCOT:(PepMatched Observed.Hits Coverage)                       | 3                        | 1      | 16.21%        |                            |                                |
|       | Seq Charge ObservedMS ExpectedMS CalculatedMS Pepscore PepHits   |                          |        |               |                            |                                |
|       | MMADEALDSGLVSR                                                   | +2                       | 747.85 | 1493.69       | 1493.69                    | 0 117 2                        |
|       | EVDVGLAADVGT LQR                                                 | +2                       | 771.91 | 1541.80       | 1541.80                    | 0 75 1                         |
|       | VFPDKDVMLNAAFALADISSK+3                                          |                          | 775.07 | 2322.20       | 2322.19                    | 0.01 41 1                      |
| 747.  | IPI00327509                                                      | Y Y                      | 2.16   | 1             | 3                          | 3                              |
| *Des: | Glia maturation factor gamma                                     |                          |        |               |                            |                                |
|       | SEQUEST:(PepMatched Observed.Hits Coverage)                      | 3                        | 1      | 28.96%        |                            |                                |
|       | Seq Charge Xcor Delta Proability PepHits                         |                          |        |               |                            |                                |
|       | NRLVQIAELTK                                                      | +2                       | 2.554  | 0.534         | 0.9650                     | 3                              |
|       | QMVVLEDEFQNV SPEELKLELPER                                        | +3                       | 4.722  | 0.653         | 1.0000                     | 1                              |
|       | NRLVQIAELTKVFEIR                                                 | +3                       | 3.465  | 0.635         | 0.9995                     | 1                              |
|       | MASCOT:(PepMatched Observed.Hits Coverage)                       | 3                        | 1      | 33.1%         |                            |                                |
|       | Seq Charge ObservedMS ExpectedMS CalculatedMS Pepscore PepHits   |                          |        |               |                            |                                |
|       | ETNNAIIMK                                                        | +2                       | 552.79 | 1103.57       | 1103.56                    | 0.01 42 1                      |
|       | NRLVQIAELTK                                                      | +2                       | 642.89 | 1283.76       | 1283.76                    | 0 42 3                         |
|       | QMVVLEDEFQNV SPEELKLELPER                                        | +3                       | 957.83 | 2870.45       | 2870.44                    | 0.01 94 1                      |
| No.   | Protein                                                          | Matched (SEQUEST MASCOT) | emPAI  | Strategy.Hits | PepMatched(SEQUEST MASCOT) | SpectraMatched(SEQUEST MASCOT) |

Identified Human Platelet Proteins

|       |                                                           |                          |            |               |                            |                                |         |    |    |
|-------|-----------------------------------------------------------|--------------------------|------------|---------------|----------------------------|--------------------------------|---------|----|----|
| 748.  | IPI00202384                                               | Y                        | Y          | 0.15          | 2                          | 3                              | 2       | 5  | 3  |
| *Des: | PREDICTED: similar to chromosome 10 open reading frame 45 |                          |            |               |                            |                                |         |    |    |
|       | SEQUEST:(PepMatched Observed.Hits Coverage) 3 2 4.52%     |                          |            |               |                            |                                |         |    |    |
|       | Seq                                                       | Charge                   | Xcor       | Delta         | Proability                 | PepHits                        |         |    |    |
|       | RTGQEVAQAQE                                               | +2                       |            | 2.892         | 0.388                      | 0.9687                         | 1       |    |    |
|       | KSDLEIELLKR                                               | +3                       |            | 3.491         | 0.317                      | 0.9998                         | 1       |    |    |
|       | GLAPQNKPELQK                                              | +2                       |            | 3.128         | 0.318                      | 0.9952                         | 4       |    |    |
|       | MASCOT:(PepMatched Observed.Hits Coverage) 2 2 3.05%      |                          |            |               |                            |                                |         |    |    |
|       | Seq                                                       | Charge                   | ObservedMS | ExpectedMS    | CalculatedMS               | Pepscore                       | PepHits |    |    |
|       | KSDLEIELLKR                                               | +3                       | 448.6030   | 1342.7871     | 1342.7820                  | 0.01                           | 41      | 1  |    |
|       | GLAPQNKPELQK                                              | +2                       | 661.8792   | 1321.7439     | 1321.7354                  | 0.01                           | 48      | 4  |    |
| No.   | Protein                                                   | Matched (SEQUENT MASCOT) | emPAI      | Strategy.Hits | PepMatched(SEQUENT MASCOT) | SpectraMatched(SEQUENT MASCOT) |         |    |    |
| 749.  | IPI00392216                                               | N                        | Y          | 0.11          | 1                          | 0                              | 4       | 0  | 25 |
| *Des: | Liver regeneration protein Irryan                         |                          |            |               |                            |                                |         |    |    |
|       | SEQUENT:(PepMatched Observed.Hits Coverage)               |                          |            |               |                            |                                |         |    |    |
|       | MASCOT:(PepMatched Observed.Hits Coverage) 4 2 8.36%      |                          |            |               |                            |                                |         |    |    |
|       | Seq                                                       | Charge                   | ObservedMS | ExpectedMS    | CalculatedMS               | Pepscore                       | PepHits |    |    |
|       | VFSQQADLSR                                                | +2                       | 575.8004   | 1149.5863     | 1149.5778                  | 0.01                           | 49      | 16 |    |
|       | AVLDVAETGTEAAAATGVK                                       | +2                       |            | 888.4487      | 1774.8828                  | 1772.9155                      | 1.97    | 83 | 6  |
|       | IAELFSDLEER                                               | +2                       | 661.3403   | 1320.6660     | 1320.6561                  | 0.01                           | 78      | 6  |    |
|       | WKDSLIPR                                                  | +2                       | 507.7935   | 1013.5725     | 1013.5658                  | 0.01                           | 44      | 2  |    |
| No.   | Protein                                                   | Matched (SEQUENT MASCOT) | emPAI      | Strategy.Hits | PepMatched(SEQUENT MASCOT) | SpectraMatched(SEQUENT MASCOT) |         |    |    |
| 750.  | IPI00476478                                               | N                        | Y          | 0.5           | 1                          | 0                              | 2       | 0  | 16 |
| *Des: | 31 kDa protein                                            |                          |            |               |                            |                                |         |    |    |
|       | SEQUENT:(PepMatched Observed.Hits Coverage)               |                          |            |               |                            |                                |         |    |    |
|       | MASCOT:(PepMatched Observed.Hits Coverage) 2 1 8.86%      |                          |            |               |                            |                                |         |    |    |
|       | Seq                                                       | Charge                   | ObservedMS | ExpectedMS    | CalculatedMS               | Pepscore                       | PepHits |    |    |
|       | IGVTVLSR                                                  | +2                       | 422.77     | 843.52        | 843.52                     | 0                              | 55      | 8  |    |
|       | SETITEEELVGLMNK+2                                         |                          | 846.93     | 1691.84       | 1691.83                    | 0.01                           | 73      | 12 |    |
| No.   | Protein                                                   | Matched (SEQUENT MASCOT) | emPAI      | Strategy.Hits | PepMatched(SEQUENT MASCOT) | SpectraMatched(SEQUENT MASCOT) |         |    |    |
| 751.  | IPI00367214                                               | N                        | Y          | 0.51          | 1                          | 0                              | 2       | 0  | 6  |
| *Des: | Hypothetical LOC313163                                    |                          |            |               |                            |                                |         |    |    |
|       | SEQUENT:(PepMatched Observed.Hits Coverage)               |                          |            |               |                            |                                |         |    |    |
|       | MASCOT:(PepMatched Observed.Hits Coverage) 2 1 12.27%     |                          |            |               |                            |                                |         |    |    |
|       | Seq                                                       | Charge                   | ObservedMS | ExpectedMS    | CalculatedMS               | Pepscore                       | PepHits |    |    |
|       | NLQYYDISAK                                                | +2                       | 607.8523   | 1213.6900     | 1213.5979                  | 0.09                           | 43      | 3  |    |
|       | GPIKFNVWDTAGQEK                                           | +3                       |            | 563.9938      | 1688.9596                  | 1688.8522                      | 0.11    | 40 | 3  |
| No.   | Protein                                                   | Matched (SEQUENT MASCOT) | emPAI      | Strategy.Hits | PepMatched(SEQUENT MASCOT) | SpectraMatched(SEQUENT MASCOT) |         |    |    |
| 752.  | IPI00471608                                               | Y                        | Y          | 0.32          | 4                          | 10                             | 7       | 14 | 21 |
| *Des: | Staphylococcal nuclease domain containing protein 1       |                          |            |               |                            |                                |         |    |    |
|       | SEQUENT:(PepMatched Observed.Hits Coverage) 10 8 20.43%   |                          |            |               |                            |                                |         |    |    |
|       | Seq                                                       | Charge                   | Xcor       | Delta         | Proability                 | PepHits                        |         |    |    |
|       | ETDGSETPEPFAAEAK                                          | +2                       |            | 4.011         | 0.541                      | 0.9999                         | 1       |    |    |

Identified Human Platelet Proteins

| Protein                                    | Matched | Observed   | Hits       | Coverage     | Seq  | Charge | ObservedMS | ExpectedMS | CalculatedMS | PepScore | PepHits |
|--------------------------------------------|---------|------------|------------|--------------|------|--------|------------|------------|--------------|----------|---------|
| VITEYLNAQESAK                              | +2      | 4.034      | 0.607      | 1.0000       | 3    |        |            |            |              |          |         |
| VMQVLNADAIVVK                              | +2      | 3.261      | 0.269      | 0.9927       | 1    |        |            |            |              |          |         |
| DTNGENIAESLVAEGLASR                        | +2      | 4.259      | 0.480      | 0.9999       | 2    |        |            |            |              |          |         |
| NLPGLVQEGEPFSEEATLFTK                      | +2      | 5.811      | 0.583      | 1.0000       | 1    |        |            |            |              |          |         |
| LRPLYDIPYMFEAR                             | +2      | 3.112      | 0.252      | 0.9853       | 1    |        |            |            |              |          |         |
| VLPAQATEYAFAFIQVPQDEDAR                    | +3      | 5.543      | 0.559      | 1.0000       | 2    |        |            |            |              |          |         |
| ALLLPDHYLVTVMLSGIK                         | +2      | 2.727      | 0.424      | 0.9975       | 1    |        |            |            |              |          |         |
| AGNFIGWLHMDGANLSVLLVEHALSK                 | +3      | 3.687      | 0.419      | 0.9997       | 2    |        |            |            |              |          |         |
| SDISSHPPVEGAYAPR                           | +3      | 4.458      | 0.517      | 1.0000       | 2    |        |            |            |              |          |         |
| MASCOT:(PepMatched Observed.Hits Coverage) | 7       | 8          | 12.54%     |              |      |        |            |            |              |          |         |
| Seq                                        | Charge  | ObservedMS | ExpectedMS | CalculatedMS |      |        |            |            |              | PepScore | PepHits |
| ETDGSETPEPFAAEAK                           | +2      | 839.88     | 1677.74    | 1677.74      | 0    | 67     | 2          |            |              |          |         |
| SDISSHPPVEGAYAPR                           | +2      | 841.91     | 1681.81    | 1681.81      | 0    | 50     | 4          |            |              |          |         |
| GDVGLGLVK                                  | +2      | 429.74     | 857.48     | 856.50       | 0.98 | 42     | 3          |            |              |          |         |
| VITEYLNAQESAK                              | +2      | 733.38     | 1464.75    | 1464.75      | 0    | 76     | 9          |            |              |          |         |
| VMQVLNADAIVVK                              | +2      | 700.41     | 1398.80    | 1398.79      | 0.01 | 52     | 1          |            |              |          |         |
| DTNGENIAESLVAEGLASR                        | +2      | 973.49     | 1944.96    | 1944.94      | 0.02 | 52     | 2          |            |              |          |         |
| VLPAQATEYAFAFIQVPQDEDAR                    | +3      | 860.43     | 2578.28    | 2578.27      | 0.01 | 56     | 6          |            |              |          |         |

No. 753. IPI00421995 Protein Matched (SEQUEST MASCOT) emPAI Strategy.Hits PepMatched(SEQUEST MASCOT) SpectraMatched(SEQUEST MASCOT)  
 Y Y 0.63 3 4 5 25 25

\*Des:

Chloride intracellular channel 1

| Protein                                     | Matched | Observed   | Hits       | Coverage     | Seq  | Charge | Xcor | Delta | Probability | PepHits  |         |
|---------------------------------------------|---------|------------|------------|--------------|------|--------|------|-------|-------------|----------|---------|
| SEQUEST:(PepMatched Observed.Hits Coverage) | 4       | 5          | 28.04%     |              |      |        |      |       |             |          |         |
| NSNPALNDNLEK                                | +2      | 3.927      | 0.401      | 0.9999       | 5    |        |      |       |             |          |         |
| LFMVLWLK                                    | +2      | 2.860      | 0.199      | 0.9847       | 4    |        |      |       |             |          |         |
| VLDNYLTSPLEEVDETSAEDEGISQR                  | +3      | 5.805      | 0.591      | 1.0000       | 1    |        |      |       |             |          |         |
| LAALNPESNTSGLDIFAK                          | +2      | 5.698      | 0.618      | 1.0000       | 21   |        |      |       |             |          |         |
| MASCOT:(PepMatched Observed.Hits Coverage)  | 5       | 5          | 26.42%     |              |      |        |      |       |             |          |         |
| Seq                                         | Charge  | ObservedMS | ExpectedMS | CalculatedMS |      |        |      |       |             | PepScore | PepHits |
| NSNPALNDNLEK                                | +2      | 664.8304   | 1327.6463  | 1327.6368    | 0.01 | 82     | 4    |       |             |          |         |
| GVTFNVTVDTK                                 | +2      | 641.3607   | 1280.7068  | 1280.6612    | 0.05 | 51     | 2    |       |             |          |         |
| LAALNPESNTSGLDIFAK                          | +2      | 930.9965   | 1859.9785  | 1859.9628    | 0.02 | 95     | 4    |       |             |          |         |
| LFMVLWLK                                    | +2      | 525.8184   | 1049.6223  | 1048.6143    | 1.01 | 45     | 4    |       |             |          |         |
| LHIVQVVCKK                                  | +2      | 583.8607   | 1165.7068  | 1165.7005    | 0.01 | 41     | 1    |       |             |          |         |

No. 754. IPI00231810 Protein Matched (SEQUEST MASCOT) emPAI Strategy.Hits PepMatched(SEQUEST MASCOT) SpectraMatched(SEQUEST MASCOT)  
 N Y 0.13 1 0 3 0 10

\*Des:

Splice Isoform 2 of Alpha adducin

| Protein                                     | Matched | Observed   | Hits       | Coverage     | Seq  | Charge | ObservedMS | ExpectedMS | CalculatedMS | PepScore | PepHits |
|---------------------------------------------|---------|------------|------------|--------------|------|--------|------------|------------|--------------|----------|---------|
| SEQUEST:(PepMatched Observed.Hits Coverage) | 3       | 1          | 7.16%      |              |      |        |            |            |              |          |         |
| MASCOT:(PepMatched Observed.Hits Coverage)  | 3       | 1          | 7.16%      |              |      |        |            |            |              |          |         |
| Seq                                         | Charge  | ObservedMS | ExpectedMS | CalculatedMS |      |        |            |            |              | PepScore | PepHits |
| VNLQGDIVDR                                  | +2      | 564.8091   | 1127.6036  | 1127.5934    | 0.01 | 44     | 6          |            |              |          |         |
| TSTSAVPLNFVPLNTNPK                          | +2      | 950.5234   | 1899.0323  | 1899.0101    | 0.02 | 43     | 3          |            |              |          |         |
| AAVVTSPPTTAPHK                              | +2      | 737.4166   | 1472.8186  | 1472.7987    | 0.02 | 43     | 1          |            |              |          |         |

No. Protein Matched (SEQUEST MASCOT) emPAI Strategy.Hits PepMatched(SEQUEST MASCOT) SpectraMatched(SEQUEST MASCOT)

| Identified Human Platelet Proteins |                                             |                          |            |               |                            |                                |          |     |         |  |
|------------------------------------|---------------------------------------------|--------------------------|------------|---------------|----------------------------|--------------------------------|----------|-----|---------|--|
| 755.                               | IPI00324893                                 | Y                        | Y          | 2.73          | 5                          | 13                             | 13       | 191 | 344     |  |
| *Des:                              | 14-3-3 protein zeta/delta                   |                          |            |               |                            |                                |          |     |         |  |
|                                    | SEQUEST:(PepMatched Observed.Hits Coverage) |                          |            | 13            | 10                         | 60.4%                          |          |     |         |  |
|                                    | Seq                                         | Charge                   | Xcor       | Delta         | Proability                 | PepHits                        |          |     |         |  |
|                                    | DICNDVLSLLEK                                | +2                       |            | 4.720         | 0.492                      | 1.0000                         | 21       |     |         |  |
|                                    | YLAEVAAGDDKK                                | +3                       |            | 3.075         | 0.354                      | 0.9998                         | 9        |     |         |  |
|                                    | SVTEQGAELSNEER                              | +2                       |            | 5.297         | 0.533                      | 1.0000                         | 6        |     |         |  |
|                                    | FLIPNASQPESK                                | +2                       |            | 3.295         | 0.444                      | 0.9994                         | 10       |     |         |  |
|                                    | LAEQAERYDDMAACMK                            | +2                       |            | 4.240         | 0.546                      | 1.0000                         | 9        |     |         |  |
|                                    | GIVDQSQQAYQEAFEISK                          | +2                       |            | 6.053         | 0.590                      | 1.0000                         | 3        |     |         |  |
|                                    | TAFDEAIAELDTLSEESYK                         | +2                       |            | 5.362         | 0.670                      | 1.0000                         | 6        |     |         |  |
|                                    | IETELRDICNDVLSLLEK                          | +2                       |            | 3.692         | 0.318                      | 0.9865                         | 2        |     |         |  |
|                                    | TAFDEAIAELDTLSEESYKDSTLIMQLLR               | +3                       |            | 7.696         | 0.709                      | 1.0000                         | 5        |     |         |  |
|                                    | VVSSIEQKTEGAEEK                             | +2                       |            | 4.048         | 0.370                      | 0.9960                         | 2        |     |         |  |
|                                    | VVSSIEQKTEGAEK                              | +2                       | 4.039      | 0.346         | 0.9951                     | 1                              |          |     |         |  |
|                                    | GIVDQSQQAYQEAFEISKK                         | +2                       |            | 4.881         | 0.579                      | 1.0000                         | 4        |     |         |  |
|                                    | SVTEQGAELSNEERNLLSVAYK                      | +2                       |            | 3.652         | 0.539                      | 1.0000                         | 3        |     |         |  |
|                                    | MASCOT:(PepMatched Observed.Hits Coverage)  |                          |            | 13            | 11                         | 51.2%                          |          |     |         |  |
|                                    | Seq                                         | Charge                   | ObservedMS | ExpectedMS    | CalculatedMS               |                                | Pepscore |     | PepHits |  |
|                                    | DICNDVLSLLEK                                | +2                       | 681.3577   | 1360.7009     | 1360.6908                  | 0.01                           | 93       | 48  |         |  |
|                                    | VVSSIEQK                                    | +2                       | 445.2557   | 888.4969      | 888.4916                   | 0.01                           | 66       | 4   |         |  |
|                                    | YLAEVAAGDDKK                                | +2                       | 640.3353   | 1278.6560     | 1278.6455                  | 0.01                           | 73       | 28  |         |  |
|                                    | SVTEQGAELSNEER                              | +2                       | 774.8674   | 1547.7202     | 1547.7063                  | 0.01                           | 96       | 20  |         |  |
|                                    | YDDMAACMK                                   | +2                       | 524.2044   | 1046.3943     | 1046.3871                  | 0.01                           | 48       | 12  |         |  |
|                                    | LAEQAERYDDMAACMK                            | +2                       | 922.9102   | 1843.8059     | 1843.7902                  | 0.02                           | 75       | 24  |         |  |
|                                    | FLIPNASQPESK                                | +2                       | 665.8585   | 1329.7024     | 1329.6928                  | 0.01                           | 72       | 20  |         |  |
|                                    | VVSSIEQKTEGAEK                              | +2                       | 752.9042   | 1503.7939     | 1503.7780                  | 0.02                           | 70       | 2   |         |  |
|                                    | VVSSIEQKTEGAEEK                             | +2                       | 816.9540   | 1631.8935     | 1631.8729                  | 0.02                           | 75       | 6   |         |  |
|                                    | DSTLIMQLLR                                  | +2                       | 595.3376   | 1188.6606     | 1188.6536                  | 0.01                           | 75       | 14  |         |  |
|                                    | LGLALNFSVFYYEILNSPEK                        | +2                       | 1159.1243  | 2316.2340     | 2316.2041                  | 0.03                           | 130      | 3   |         |  |
|                                    | EMQPTHPIR                                   | +2                       | 554.7859   | 1107.5572     | 1107.5495                  | 0.01                           | 54       | 11  |         |  |
|                                    | EMQPTHPIRLGLALNFSVFYYEILNSPEK               | +3                       |            | 1136.2618     | 3405.7637                  | 3405.7430                      | 0.02     | 89  | 6       |  |
| No.                                | Protein                                     | Matched (SEQUEST MASCOT) | emPAI      | Strategy.Hits | PepMatched(SEQUEST MASCOT) | SpectraMatched(SEQUEST MASCOT) |          |     |         |  |
| 756.                               | IPI00366416                                 | Y                        | Y          | 0.56          | 1                          | 2                              | 3        | 4   | 6       |  |
| *Des:                              | PREDICTED: similar to cytochrome c-1        |                          |            |               |                            |                                |          |     |         |  |
|                                    | SEQUEST:(PepMatched Observed.Hits Coverage) |                          |            | 2             | 1                          | 9.03%                          |          |     |         |  |
|                                    | Seq                                         | Charge                   | Xcor       | Delta         | Proability                 | PepHits                        |          |     |         |  |
|                                    | LSDYFPKPYPNPEAAR                            | +2                       |            | 3.471         | 0.475                      | 0.9999                         | 4        |     |         |  |
|                                    | GLLSSLDHTSIR                                | +2                       |            | 2.728         | 0.367                      | 0.9968                         | 2        |     |         |  |
|                                    | MASCOT:(PepMatched Observed.Hits Coverage)  |                          |            | 3             | 1                          | 14.15%                         |          |     |         |  |
|                                    | Seq                                         | Charge                   | ObservedMS | ExpectedMS    | CalculatedMS               |                                | Pepscore |     | PepHits |  |
|                                    | LSDYFPKPYPNPEAAR                            | +2                       | 932.97     | 1863.93       | 1863.92                    | 0.01                           | 62       | 4   |         |  |
|                                    | GLLSSLDHTSIR                                | +2                       | 649.86     | 1297.71       | 1297.70                    | 0.01                           | 57       | 2   |         |  |
|                                    | AANNGALPPDLSYIVR                            | +2                       | 835.95     | 1669.89       | 1669.88                    | 0.01                           | 49       | 4   |         |  |
| No.                                | Protein                                     | Matched (SEQUEST MASCOT) | emPAI      | Strategy.Hits | PepMatched(SEQUEST MASCOT) | SpectraMatched(SEQUEST MASCOT) |          |     |         |  |

Identified Human Platelet Proteins

757. IPI00551729 N Y 0.27 1 0 2 0 12

\*Des: 50 kDa protein

SEQUEST:(PepMatched Observed.Hits Coverage)

| Seq                                                  | Charge | ObservedMS | ExpectedMS | CalculatedMS | PepScore | PepHits |
|------------------------------------------------------|--------|------------|------------|--------------|----------|---------|
| MASCOT:(PepMatched Observed.Hits Coverage) 2 1 5.31% |        |            |            |              |          |         |
| IGGIGTVPVGR                                          | +2     | 514.24     | 1026.47    | 1024.60      | 1.87     | 65 8    |
| EHALLAYTLGVK                                         | +2     | 657.88     | 1313.74    | 1313.73      | 0.01     | 50 7    |

No. Protein Matched (SEQUEST MASCOT) emPAI Strategy.Hits PepMatched(SEQUEST MASCOT) SpectraMatched(SEQUEST MASCOT)

758. IPI00209216 Y Y 0.34 1 6 5 7 12

\*Des: Splice Isoform 2 of Gamma adducin

SEQUEST:(PepMatched Observed.Hits Coverage)

| Seq                                                   | Charge | Xcor   | Delta   | Proability | PepHits | PepScore | PepHits |
|-------------------------------------------------------|--------|--------|---------|------------|---------|----------|---------|
| MASCOT:(PepMatched Observed.Hits Coverage) 5 1 12.55% |        |        |         |            |         |          |         |
| AFTHGVA                                               | +2     | 3.743  | 0.447   | 3.880      | 0.525   | 1.0000   | 1       |
| VNIIGEVVDQGSTNLK                                      | +2     | 4.608  | 0.621   | 1.0000     | 2       |          |         |
| VGEIEFEGLMR                                           | +2     | 3.319  | 0.484   | 0.9973     | 1       |          |         |
| FEDDDQPPAPPNPF                                        | +3     | 4.685  | 0.546   | 1.0000     | 1       |          |         |
| AFTHGVA                                               | +3     | 3.599  | 0.404   | 0.9997     | 2       |          |         |
| AFTHGVA                                               | +3     | 681.99 | 1279.70 | 1278.63    | 1.07    | 47       | 0       |
| VGEIEFEGLMR                                           | +2     | 640.86 | 1279.70 | 1278.63    | 1.07    | 47       | 2       |
| LTTSTTIENIEITIK                                       | +2     | 838.97 | 1675.93 | 1675.92    | 0.01    | 50       | 2       |
| VNIIGEVVDQGSTNLK                                      | +2     | 843.46 | 1684.91 | 1684.90    | 0.01    | 97       | 4       |
| TAGPQSLLAGIVVDKPPSTMR                                 | +3     | 756.08 | 2265.23 | 2265.22    | 0.01    | 50       | 2       |

No. Protein Matched (SEQUEST MASCOT) emPAI Strategy.Hits PepMatched(SEQUEST MASCOT) SpectraMatched(SEQUEST MASCOT)

759. IPI00230941 Y Y 0.16 2 2 3 3 3

\*Des: Vimentin

SEQUEST:(PepMatched Observed.Hits Coverage)

| Seq                                                  | Charge | Xcor     | Delta     | Proability | PepHits | PepScore | PepHits |
|------------------------------------------------------|--------|----------|-----------|------------|---------|----------|---------|
| MASCOT:(PepMatched Observed.Hits Coverage) 3 1 7.82% |        |          |           |            |         |          |         |
| FADLSEAANR                                           | +2     | 2.715    | 0.338     | 0.9956     | 5       |          |         |
| KVESLQEEIAFLKK                                       | +3     | 3.197    | 0.176     | 0.9638     | 1       |          |         |
| ILLAELQLKGGQK                                        | +2     | 771.3616 | 1540.7086 | 1538.9031  | 1.81    | 50       | 2       |
| KVESLQEEIAFLKK                                       | +3     | 554.6533 | 1660.9379 | 1660.9399  | 0       | 43       | 2       |
| FLEQQNKILLAELEQLKGGQK                                | +3     | 809.7935 | 2426.3585 | 2426.3532  | 0.01    | 53       | 2       |

No. Protein Matched (SEQUEST MASCOT) emPAI Strategy.Hits PepMatched(SEQUEST MASCOT) SpectraMatched(SEQUEST MASCOT)

760. IPI00362201 Y N 0.28 1 2 0 3 0

\*Des: PREDICTED: similar to IAP-associated factor VIAF1

SEQUEST:(PepMatched Observed.Hits Coverage)

| Seq                                                   | Charge | Xcor  | Delta | Proability | PepHits | PepScore | PepHits |
|-------------------------------------------------------|--------|-------|-------|------------|---------|----------|---------|
| MASCOT:(PepMatched Observed.Hits Coverage) 2 1 10.24% |        |       |       |            |         |          |         |
| FGEVLEISGK                                            | +2     | 2.905 | 0.340 | 0.9948     | 2       |          |         |
| AGEGLWVVLHLYK                                         | +3     | 3.852 | 0.512 | 0.9999     | 1       |          |         |

Identified Human Platelet Proteins

MASCOT:(PepMatched Observed.Hits Coverage)

| No.  | Protein     | Matched (SEQUEST MASCOT) | emPAI | Strategy.Hits | PepMatched(SEQUEST MASCOT) | SpectraMatched(SEQUEST MASCOT) |
|------|-------------|--------------------------|-------|---------------|----------------------------|--------------------------------|
| 761. | IPI00214905 | Y Y                      | 11.41 | 5             | 13 22 70                   | 282                            |

\*Des: Tropomyosin alpha 4 chain

| SEQUEST:(PepMatched Observed.Hits Coverage) | 13     | 10    | 48.41% |
|---------------------------------------------|--------|-------|--------|
| Seq                                         | Charge | Xcor  | Delta  |
| IQALQQQADDAEDR                              | +2     | 5.151 | 0.502  |
| KIQALQQQADDAEDRAQGLQR                       | +2     | 5.143 | 0.506  |
| SSDLEELKNVTNNLK                             | +2     | 5.083 | 0.470  |
| EENVGLHQTLDQTLNELNCI                        | +2     | 5.219 | 0.604  |
| EKAEGDAAALNR                                | +2     | 3.912 | 0.481  |
| TIDDLEEKLAQAK                               | +2     | 3.625 | 0.293  |
| EENVGLHQTLDQTLNELNC                         | +2     | 5.250 | 0.491  |
| LAQAKEENVGLHQTLDQTLNELNCI                   | +2     | 4.234 | 0.607  |
| LAQAKEENVGLHQTLDQTLNELNC                    | +3     | 3.990 | 0.471  |
| REKAEGDAAALNR                               | +2     | 5.305 | 0.409  |
| KIQALQQQADDAEDR                             | +2     | 5.051 | 0.531  |
| KLVILEGELERAER                              | +2     | 3.585 | 0.453  |
| LLSDKLKEAETR                                | +2     | 3.819 | 0.402  |

| MASCOT:(PepMatched Observed.Hits Coverage) | 22     | 13         | 73.01%     |              |          |         |     |
|--------------------------------------------|--------|------------|------------|--------------|----------|---------|-----|
| Seq                                        | Charge | ObservedMS | ExpectedMS | CalculatedMS | Pepscore | PepHits |     |
| EKAEGDAAALNR                               | +2     | 622.8203   | 1243.6260  | 1243.6156    | 0.01     | 87      | 10  |
| IQALQQQADDAEDR                             | +2     | 800.8884   | 1599.7623  | 1599.7489    | 0.01     | 111     | 9   |
| MEIQEMQLK                                  | +2     | 575.2896   | 1148.5647  | 1148.5569    | 0.01     | 49      | 2   |
| IQLVEEELDR                                 | +2     | 622.3340   | 1242.6534  | 1242.6455    | 0.01     | 82      | 29  |
| TIDDLEEKLAQAK                              | +2     | 737.3972   | 1472.7799  | 1472.7722    | 0.01     | 70      | 2   |
| SSDLEELKNVTNNLK                            | +2     | 916.9730   | 1831.9314  | 1831.9163    | 0.02     | 97      | 26  |
| LVILEGELER                                 | +2     | 585.8451   | 1169.6756  | 1169.6655    | 0.01     | 59      | 17  |
| LEEAKEADESER                               | +2     | 738.8504   | 1475.6863  | 1475.6739    | 0.01     | 70      | 91  |
| IQLVEEELDRAQER                             | +2     | 864.4552   | 1726.8958  | 1726.8849    | 0.01     | 64      | 143 |
| AMKDEEKMEIQEMQLK                           | +2     | 990.9833   | 1979.9520  | 1979.9366    | 0.02     | 101     | 13  |
| LATALQKLEEA EK                             | +2     | 722.4111   | 1442.8077  | 1442.7980    | 0.01     | 88      | 69  |
| RIQLVEEELDRAQER                            | +2     | 942.5091   | 1883.0036  | 1882.9860    | 0.02     | 53      | 114 |
| KLVILEGELER                                | +3     | 433.5968   | 1297.7685  | 1297.7605    | 0.01     | 59      | 5   |
| LVILEGELERAER                              | +2     | 828.4581   | 1654.9017  | 1654.8889    | 0.01     | 59      | 5   |
| KLVILEGELERAER                             | +2     | 892.5059   | 1782.9972  | 1782.9839    | 0.01     | 41      | 4   |
| REKAEGDAAALNR                              | +2     | 700.8725   | 1399.7304  | 1399.7167    | 0.01     | 89      | 6   |
| AEGDAAALNRR                                | +2     | 572.3012   | 1142.5879  | 1142.5792    | 0.01     | 43      | 1   |
| EKAEGDAAALNRR                              | +2     | 700.8723   | 1399.7301  | 1399.7167    | 0.01     | 67      | 6   |
| KIQALQQQADDAEDR                            | +2     | 864.9382   | 1727.8619  | 1727.8438    | 0.02     | 116     | 3   |
| LEEAKEADESERGMK                            | +2     | 896.9334   | 1791.8521  | 1791.8308    | 0.02     | 54      | 10  |
| HIAEEADRKYEEVAR                            | +2     | 908.4594   | 1814.9042  | 1814.8911    | 0.01     | 66      | 56  |
| LLSDKLKEAETR                               | +2     | 701.9042   | 1401.7938  | 1401.7827    | 0.01     | 72      | 5   |

| No.  | Protein     | Matched (SEQUEST MASCOT) | emPAI | Strategy.Hits | PepMatched(SEQUEST MASCOT) | SpectraMatched(SEQUEST MASCOT) |
|------|-------------|--------------------------|-------|---------------|----------------------------|--------------------------------|
| 762. | IPI00199688 | Y Y                      | 0.54  | 1             | 3 7 5                      | 39                             |



Identified Human Platelet Proteins

\*Des: Mitogen-activated protein kinase 1

| SEQUENT:(PepMatched Observed.Hits Coverage) |        | 3          | 1          | 12.36%       |          |         |    |  |
|---------------------------------------------|--------|------------|------------|--------------|----------|---------|----|--|
| Seq                                         | Charge | Xcor       | Delta      | Probility    | PepHits  |         |    |  |
| APEIMLNSK                                   | +2     | 2.857      | 0.517      | 0.9998       | 5        |         |    |  |
| VADPDHDHTGFLTEYVATR                         | +3     | 4.509      | 0.577      | 1.0000       | 1        |         |    |  |
| FRHENIIGINDIIR                              | +3     | 4.046      | 0.421      | 0.9988       | 2        |         |    |  |
| MASCOT:(PepMatched Observed.Hits Coverage)  |        | 7          | 1          | 20.87%       |          |         |    |  |
| Seq                                         | Charge | ObservedMS | ExpectedMS | CalculatedMS | Pepscore | PepHits |    |  |
| APEIMLNSK                                   | +2     | 501.77     | 1001.53    | 1001.52      | 0.01     | 51      | 12 |  |
| GQVFDVGPR                                   | +2     | 487.76     | 973.50     | 973.50       | 0        | 48      | 21 |  |
| ELIFEETAR                                   | +2     | 554.29     | 1106.57    | 1106.56      | 0.01     | 55      | 9  |  |
| VADPDHDHTGFLTEYVATR                         | +3     | 715.34     | 2143.01    | 2143.00      | 0.01     | 54      | 3  |  |
| FDMELDDLK                                   | +2     | 611.79     | 1221.57    | 1221.56      | 0.01     | 41      | 6  |  |
| HENIIGINDIIR                                | +2     | 703.90     | 1405.78    | 1405.77      | 0.01     | 46      | 6  |  |
| FRHENIIGINDIIR                              | +3     | 570.65     | 1708.94    | 1708.94      | 0        | 63      | 6  |  |

No. 763. Protein IPI00198887 Matched (SEQUENT MASCOT) Y Y emPAI 0.36 Strategy.Hits 1 PepMatched(SEQUEST MASCOT) 9 SpectraMatched(SEQUEST MASCOT) 10

\*Des: Protein disulfide-isomerase precursor

| SEQUENT:(PepMatched Observed.Hits Coverage) |        | 9          | 2          | 30.88%       |          |         |   |  |
|---------------------------------------------|--------|------------|------------|--------------|----------|---------|---|--|
| Seq                                         | Charge | Xcor       | Delta      | Probility    | PepHits  |         |   |  |
| LGETYKDHENIVIAK                             | +3     | 3.758      | 0.440      | 0.9971       | 3        |         |   |  |
| NFEEVAFDEKK                                 | +2     | 3.074      | 0.312      | 0.9963       | 1        |         |   |  |
| VDATEESDLAQYGV                              | +2     | 5.065      | 0.593      | 1.0000       | 2        |         |   |  |
| EADDIVNWLK                                  | +2     | 2.792      | 0.370      | 0.9978       | 2        |         |   |  |
| HNQLPLVIEFTEQTAPK                           | +2     | 4.136      | 0.555      | 1.0000       | 2        |         |   |  |
| ILFIFIDSDHTDNQR                             | +2     | 4.257      | 0.508      | 0.9999       | 2        |         |   |  |
| QFLLAEEAVDDIPFGITSNSDVFSK                   | +3     | 5.725      | 0.559      | 1.0000       | 1        |         |   |  |
| TGPAATTLSDTAAAESLVSSEVTIGFFK                | +3     | 4.854      | 0.648      | 1.0000       | 1        |         |   |  |
| MDSTANEVEAVK                                | +2     | 3.427      | 0.485      | 0.9999       | 1        |         |   |  |
| MASCOT:(PepMatched Observed.Hits Coverage)  |        | 9          | 2          | 30.69%       |          |         |   |  |
| Seq                                         | Charge | ObservedMS | ExpectedMS | CalculatedMS | Pepscore | PepHits |   |  |
| MDSTANEVEAVK                                | +2     | 647.31     | 1292.60    | 1292.59      | 0.01     | 58      | 1 |  |
| LGETYKDHENIVIAK                             | +2     | 865.46     | 1728.91    | 1728.90      | 0.01     | 71      | 2 |  |
| NFEEVAFDEKK                                 | +2     | 678.33     | 1354.65    | 1354.64      | 0.01     | 43      | 1 |  |
| VDATEESDLAQYGV                              | +2     | 890.92     | 1779.83    | 1779.83      | 0        | 84      | 2 |  |
| THILLFLPK                                   | +2     | 541.34     | 1080.67    | 1080.67      | 0        | 46      | 2 |  |
| ILFIFIDSDHTDNQR                             | +2     | 917.46     | 1832.91    | 1832.91      | 0        | 64      | 2 |  |
| HNQLPLVIEFTEQTAPK                           | +2     | 983.03     | 1964.05    | 1964.04      | 0.01     | 62      | 2 |  |
| QFLLAEEAVDDIPFGITSNSDVFSK                   | +3     | 895.46     | 2683.35    | 2683.34      | 0.01     | 61      | 1 |  |
| TGPAATTLSDTAAAESLVSSEVTIGFFK                | +3     | 995.84     | 2984.50    | 2984.49      | 0.01     | 77      | 1 |  |

No. 764. Protein IPI00212220 Matched (SEQUENT MASCOT) Y Y emPAI 0.29 Strategy.Hits 2 PepMatched(SEQUEST MASCOT) 2 SpectraMatched(SEQUEST MASCOT) 12

\*Des: Protein disulfide-isomerase A4 precursor

| SEQUENT:(PepMatched Observed.Hits Coverage) |        | 2    | 1     | 3.36%     |         |  |  |  |
|---------------------------------------------|--------|------|-------|-----------|---------|--|--|--|
| Seq                                         | Charge | Xcor | Delta | Probility | PepHits |  |  |  |

Identified Human Platelet Proteins

|          |                                             |                          |            |               |                            |                                |        |          |         |
|----------|---------------------------------------------|--------------------------|------------|---------------|----------------------------|--------------------------------|--------|----------|---------|
|          | VDATEQTDLAK                                 | +2                       | 3.111      | 0.378         | 0.9982                     | 2                              |        |          |         |
|          | FIDEHATKR                                   | +2                       | 2.801      | 0.298         | 0.9934                     | 3                              |        |          |         |
|          | MASCOT:(PepMatched Observed.Hits Coverage)  |                          | 7          | 2             | 14.98%                     |                                |        |          |         |
|          | Seq                                         | Charge                   | ObservedMS | ExpectedMS    | CalculatedMS               |                                |        | PepScore | PepHits |
|          | IDATSASMLASK                                | +2                       | 597.81     | 1193.60       | 1193.60                    | 0                              | 92     | 5        |         |
|          | MDATANDITNDR                                | +2                       | 668.79     | 1335.57       | 1335.57                    | 0                              | 81     | 2        |         |
|          | MHVMDVQGSTEASAIK                            | +2                       |            | 852.41        | 1702.80                    | 1702.80                        | 0      | 98       | 2       |
|          | FDVSGYPTIK                                  | +2                       | 563.52     | 1125.02       | 1125.57                    | -0.54                          | 60     | 5        |         |
|          | RFDVSGYPTLK                                 | +3                       | 428.23     | 1281.67       | 1281.67                    | 0                              | 43     | 3        |         |
|          | FAMEPEEFDSALR                               | +2                       | 828.86     | 1655.71       | 1655.71                    | 0                              | 54     | 2        |         |
|          | YGIVDYMVEQSGPPSK                            | +2                       |            | 885.43        | 1768.84                    | 1768.83                        | 0.01   | 77       | 2       |
| No. 765. | Protein                                     | Matched (SEQUENT MASCOT) | emPAI      | Strategy.Hits | PepMatched(SEQUENT MASCOT) | SpectraMatched(SEQUENT MASCOT) |        |          |         |
|          | IPI00206743                                 | N                        | Y          | 0.3           | 1                          | 0                              | 2      | 0        | 2       |
| *Des:    | 30 kDa protein                              |                          |            |               |                            |                                |        |          |         |
|          | SEQUENT:(PepMatched Observed.Hits Coverage) |                          |            |               |                            |                                |        |          |         |
|          | MASCOT:(PepMatched Observed.Hits Coverage)  |                          |            | 2             | 1                          | 11.65%                         |        |          |         |
|          | Seq                                         | Charge                   | ObservedMS | ExpectedMS    | CalculatedMS               |                                |        | PepScore | PepHits |
|          | AGPELLLDNIR                                 | +2                       | 649.36     | 1296.71       | 1296.70                    | 0.01                           | 52     | 1        |         |
|          | SIYSLILGQDNAADQSR                           | +2                       |            | 925.98        | 1849.94                    | 1849.92                        | 0.02   | 79       | 2       |
| No. 766. | Protein                                     | Matched (SEQUENT MASCOT) | emPAI      | Strategy.Hits | PepMatched(SEQUENT MASCOT) | SpectraMatched(SEQUENT MASCOT) |        |          |         |
|          | IPI00215564                                 | Y                        | Y          | 1.03          | 2                          | 2                              | 4      | 3        | 6       |
| *Des:    | Ras-related protein Rab-7                   |                          |            |               |                            |                                |        |          |         |
|          | SEQUENT:(PepMatched Observed.Hits Coverage) |                          |            | 2             | 1                          | 15.16%                         |        |          |         |
|          | Seq                                         | Charge                   | Xcor       | Delta         | Proability                 | PepHits                        |        |          |         |
|          | EAINVEQAFQTIAR                              | +2                       |            | 3.273         | 0.428                      | 0.9977                         | 2      |          |         |
|          | TLDSWRDEFLIQASPR                            | +3                       |            | 3.165         | 0.247                      | 0.9569                         | 1      |          |         |
|          | MASCOT:(PepMatched Observed.Hits Coverage)  |                          |            | 4             | 1                          | 24.64%                         |        |          |         |
|          | Seq                                         | Charge                   | ObservedMS | ExpectedMS    | CalculatedMS               |                                |        | PepScore | PepHits |
|          | ATIGADFLTK                                  | +2                       | 518.8194   | 1035.6242     | 1035.5600                  | 0.06                           | 56     | 3        |         |
|          | VIIIGDSGVGK                                 | +2                       | 529.3469   | 1056.6792     | 1056.6178                  | 0.06                           | 72     | 3        |         |
|          | DPENFPFVVLGNK                               | +2                       | 738.4340   | 1474.8534     | 1474.7456                  | 0.11                           | 50     | 1        |         |
|          | EAINVEQAFQTIAR                              | +2                       | 795.4725   | 1588.9304     | 1588.8209                  | 0.11                           | 81     | 3        |         |
| No. 767. | Protein                                     | Matched (SEQUENT MASCOT) | emPAI      | Strategy.Hits | PepMatched(SEQUENT MASCOT) | SpectraMatched(SEQUENT MASCOT) |        |          |         |
|          | IPI00230874                                 | Y                        | Y          | 1.05          | 1                          | 5                              | 5      | 6        | 6       |
| *Des:    | Biliverdin reductase A precursor            |                          |            |               |                            |                                |        |          |         |
|          | SEQUENT:(PepMatched Observed.Hits Coverage) |                          |            | 5             | 1                          | 30.66%                         |        |          |         |
|          | Seq                                         | Charge                   | Xcor       | Delta         | Proability                 | PepHits                        |        |          |         |
|          | MTVQLETQNK                                  | +2                       |            | 2.731         | 0.360                      | 0.9943                         | 1      |          |         |
|          | YVNFQFTSGSLEEVPSVGVNK                       | +3                       |            | 3.498         | 0.288                      | 0.9906                         | 1      |          |         |
|          | VLHEEHVELLMEEFEFLR                          | +3                       |            | 3.246         | 0.352                      | 0.9968                         | 2      |          |         |
|          | SAAFNLIGFVSR                                | +2                       |            | 3.809         | 0.455                      | 0.9996                         | 2      |          |         |
|          | HVLVEYPMTLSFAAAQELWELAAQK                   | +3                       |            |               | 4.412                      | 0.449                          | 0.9997 | 2        |         |
|          | MASCOT:(PepMatched Observed.Hits Coverage)  |                          |            | 5             | 1                          | 27.33%                         |        |          |         |
|          | Seq                                         | Charge                   | ObservedMS | ExpectedMS    | CalculatedMS               |                                |        | PepScore | PepHits |

Identified Human Platelet Proteins

|                                            |    |        |         |         |      |    |   |  |  |
|--------------------------------------------|----|--------|---------|---------|------|----|---|--|--|
| FGVVVGVGR                                  | +2 | 494.80 | 987.59  | 987.59  | 0    | 53 | 1 |  |  |
| FGFPAFSGISR                                | +2 | 593.31 | 1184.60 | 1184.60 | 0    | 44 | 2 |  |  |
| SA AFLNLIGFVSR                             | +2 | 697.89 | 1393.77 | 1393.77 | 0    | 51 | 1 |  |  |
| VLHEEHVELLMEEFEFLR                         | +3 | 767.06 | 2298.15 | 2298.14 | 0.01 | 43 | 1 |  |  |
| HVLVEYPM T L S F A A A Q E L W E L A A Q K | +3 | 949.17 | 2844.48 | 2844.45 | 0.03 | 48 | 2 |  |  |

No. 768. Protein IPI00231749 Matched (SEQUEST MASCOT) Y Y emPAI Strategy.Hits 0.85 1 PepMatched (SEQUEST MASCOT) 6 3 8 SpectraMatched (SEQUEST MASCOT) 4

\*Des: Phosphatidylinositol transfer protein alpha isoform

|                                             |        |            |            |              |         |    |          |         |
|---------------------------------------------|--------|------------|------------|--------------|---------|----|----------|---------|
| SEQUEST:(PepMatched Observed.Hits Coverage) |        | 6          | 2          | 36.36%       |         |    |          |         |
| Seq                                         | Charge | Xcor       | Delta      | Proability   | PepHits |    |          |         |
| MLAPEGALNIHEK                               | +2     | 3.381      | 0.451      | 0.9995       | 2       |    |          |         |
| NETGGGEGVEVLVNEPYEK                         | +2     | 5.247      | 0.592      | 1.0000       | 1       |    |          |         |
| HVEAIYIDIADR                                | +2     | 3.300      | 0.650      | 1.0000       | 2       |    |          |         |
| WVDLTMDDIR                                  | +2     | 2.942      | 0.359      | 0.9977       | 2       |    |          |         |
| VILPVSVDEYQVGQLYSVAEASK                     | +2     | 5.333      | 0.628      | 1.0000       | 2       |    |          |         |
| IETWHKPDLGTQENVHK                           | +3     | 3.263      | 0.260      | 0.9923       | 2       |    |          |         |
| MASCOT:(PepMatched Observed.Hits Coverage)  |        | 3          | 2          | 18.54%       |         |    |          |         |
| Seq                                         | Charge | ObservedMS | ExpectedMS | CalculatedMS |         |    | Pepscore | PepHits |
| MLAPEGALNIHEK                               | +2     | 711.88     | 1421.74    | 1421.73      | 0.01    | 44 | 1        |         |
| HVEAIYIDIADR                                | +2     | 707.87     | 1413.72    | 1413.73      | 0       | 54 | 2        |         |
| VILPVSVDEYQVGQLYSVAEASK                     | +3     | 832.11     | 2493.30    | 2493.30      | 0       | 45 | 1        |         |

No. 769. Protein IPI00231677 Matched (SEQUEST MASCOT) Y Y emPAI Strategy.Hits 1.55 5 PepMatched (SEQUEST MASCOT) 10 8 74 SpectraMatched (SEQUEST MASCOT) 137

\*Des: 14-3-3 protein eta

|                                             |        |            |            |              |         |    |          |         |
|---------------------------------------------|--------|------------|------------|--------------|---------|----|----------|---------|
| SEQUEST:(PepMatched Observed.Hits Coverage) |        | 10         | 7          | 55.6%        |         |    |          |         |
| Seq                                         | Charge | Xcor       | Delta      | Proability   | PepHits |    |          |         |
| YLAEVASGEKK                                 | +2     | 3.109      | 0.375      | 0.9982       | 3       |    |          |         |
| NCNDFQYESK                                  | +2     | 3.610      | 0.508      | 1.0000       | 4       |    |          |         |
| NSVVEASEAAYK                                | +2     | 4.402      | 0.572      | 1.0000       | 4       |    |          |         |
| AVTELNEPLSNEDR                              | +2     | 4.856      | 0.470      | 1.0000       | 2       |    |          |         |
| LAEQAERYDDMASAMK                            | +3     | 3.080      | 0.453      | 0.9999       | 3       |    |          |         |
| QAFDDAIAELDTLNEDSYK                         | +2     | 4.987      | 0.642      | 1.0000       | 3       |    |          |         |
| QAFDDAIAELDTLNEDSYKDSTLIMQLLR               | +3     | 5.879      | 0.607      | 1.0000       | 2       |    |          |         |
| ELETVCNDVLALLDKFLIK                         | +2     | 4.347      | 0.454      | 1.0000       | 2       |    |          |         |
| IEKELETVCNDVLALLDKFLIK                      | +3     | 5.829      | 0.361      | 1.0000       | 7       |    |          |         |
| EAFEISKEHMQPTHPIR                           | +3     | 3.963      | 0.410      | 1.0000       | 2       |    |          |         |
| MASCOT:(PepMatched Observed.Hits Coverage)  |        | 8          | 8          | 43.6%        |         |    |          |         |
| Seq                                         | Charge | ObservedMS | ExpectedMS | CalculatedMS |         |    | Pepscore | PepHits |
| YLAEVASGEK                                  | +2     | 533.7823   | 1065.5501  | 1065.5342    | 0.02    | 43 | 5        |         |
| NCNDFQYESK                                  | +2     | 624.2593   | 1246.5040  | 1246.4924    | 0.01    | 55 | 6        |         |
| NSVVEASEAAYK                                | +2     | 634.3166   | 1266.6187  | 1266.6091    | 0.01    | 95 | 6        |         |
| AVTELNEPLSNEDR                              | +2     | 793.8927   | 1585.7708  | 1585.7583    | 0.01    | 78 | 4        |         |
| LAEQAERYDDMASAMK                            | +2     | 914.9235   | 1827.8325  | 1827.8131    | 0.02    | 64 | 5        |         |
| YLAEVASGEKK                                 | +2     | 597.8267   | 1193.6389  | 1193.6291    | 0.01    | 47 | 3        |         |
| IEKELETVCNDVLALLDKFLIK                      | +3     | 849.4840   | 2545.4302  | 2545.4076    | 0.02    | 69 | 2        |         |

Identified Human Platelet Proteins

EAFEISKEHMQPHTPIR +2 1025.5305 2049.0465 2049.0101 0.04 43 1

| No.   | Protein                                     | Matched (SEQUEST MASCOT) | emPAI      | Strategy.Hits | PepMatched(SEQUEST MASCOT) | SpectraMatched(SEQUEST MASCOT) |
|-------|---------------------------------------------|--------------------------|------------|---------------|----------------------------|--------------------------------|
| 770.  | IPI00207475                                 | Y Y                      | 0.37       | 1             | 3 2 4                      | 2                              |
| *Des: | Endothelial cell adhesion molecule          |                          |            |               |                            |                                |
|       | SEQUEST:(PepMatched Observed.Hits Coverage) |                          |            | 3             | 1                          | 13.71%                         |
|       | Seq                                         | Charge Xcor              | Delta      | Proability    | PepHits                    |                                |
|       | LDALQEGDSGTYR                               | +2                       | 3.778      | 0.515         | 0.9999 1                   |                                |
|       | LAPSSQVFFGPALDTR                            | +2                       | 4.712      | 0.593         | 1.0000 2                   |                                |
|       | EESSSHPEAPFLIWFLEQEGK                       | +3                       | 3.225      | 0.312         | 0.9947 1                   |                                |
|       | MASCOT:(PepMatched Observed.Hits Coverage)  |                          |            | 2             | 1                          | 7.98%                          |
|       | Seq                                         | Charge ObservedMS        | ExpectedMS | CalculatedMS  |                            | Pepscore PepHits               |
|       | LDALQEGDSGTYR                               | +2 712.84                | 1423.66    | 1423.66       | 0 61                       | 1                              |
|       | LAPSSQVFFGPALDTR                            | +2 902.98                | 1803.95    | 1803.95       | 0 58                       | 2                              |

| No.   | Protein                                     | Matched (SEQUEST MASCOT) | emPAI      | Strategy.Hits | PepMatched(SEQUEST MASCOT) | SpectraMatched(SEQUEST MASCOT) |
|-------|---------------------------------------------|--------------------------|------------|---------------|----------------------------|--------------------------------|
| 771.  | IPI00204206                                 | Y Y                      | 0.59       | 2             | 5 4 5                      | 44                             |
| *Des: | Tropomyosin alpha isoform                   |                          |            |               |                            |                                |
|       | SEQUEST:(PepMatched Observed.Hits Coverage) |                          |            | 5             | 2                          | 21.1%                          |
|       | Seq                                         | Charge Xcor              | Delta      | Proability    | PepHits                    |                                |
|       | AEADVASLNR                                  | +2                       | 2.842      | 0.387         | 0.9979 2                   |                                |
|       | EENLSMHQMLDQTLLELNN                         | +2                       | 4.605      | 0.472         | 1.0000 1                   |                                |
|       | AELSEGQVR                                   | +2                       | 2.824      | 0.209         | 0.9779 1                   |                                |
|       | VAHAKEENLSMHQMLDQTLLELNNM                   | +3                       | 4.419      | 0.443         | 1.0000 1                   |                                |
|       | SKQLEEDISAKEK                               | +3                       | 3.593      | 0.168         | 0.9740 1                   |                                |
|       | MASCOT:(PepMatched Observed.Hits Coverage)  |                          |            | 4             | 3                          | 17.3%                          |
|       | Seq                                         | Charge ObservedMS        | ExpectedMS | CalculatedMS  |                            | Pepscore PepHits               |
|       | AELSEGQVR                                   | +2 494.7593              | 987.5041   | 987.4985      | 0.01 61                    | 5                              |
|       | QLEEDISAKEK                                 | +2 645.3393              | 1288.6640  | 1288.6510     | 0.01 42                    | 2                              |
|       | AEADVASLNR                                  | +2 523.2709              | 1044.5272  | 1044.5199     | 0.01 41                    | 3                              |
|       | AQKDEEKMEIQEIQLK                            | +2 980.5159              | 1959.0173  | 1958.9982     | 0.02 110                   | 36                             |

| No.   | Protein                                     | Matched (SEQUEST MASCOT) | emPAI      | Strategy.Hits | PepMatched(SEQUEST MASCOT) | SpectraMatched(SEQUEST MASCOT) |
|-------|---------------------------------------------|--------------------------|------------|---------------|----------------------------|--------------------------------|
| 772.  | IPI00190530                                 | Y Y                      | 0.97       | 1             | 7 7 14                     | 24                             |
| *Des: | 41 kDa protein                              |                          |            |               |                            |                                |
|       | SEQUEST:(PepMatched Observed.Hits Coverage) |                          |            | 7             | 1                          | 31.42%                         |
|       | Seq                                         | Charge Xcor              | Delta      | Proability    | PepHits                    |                                |
|       | TLFPGTDHIDQLK                               | +2                       | 3.407      | 0.269         | 0.9945 3                   |                                |
|       | NYIQSLAQMPK                                 | +2                       | 3.591      | 0.407         | 0.9996 3                   |                                |
|       | YIHSADIIHR                                  | +3                       | 3.339      | 0.392         | 0.9998 4                   |                                |
|       | HENVIGLLDVFTPAR                             | +2                       | 5.647      | 0.579         | 1.0000 4                   |                                |
|       | LTDDHVQFLIYQILR                             | +3                       | 3.396      | 0.413         | 0.9997 1                   |                                |
|       | SLEEFNDVYLVTHLMGADLNNIVK                    | +3                       | 5.632      | 0.524         | 1.0000 1                   |                                |
|       | MNFANVFIGANPLAVDLLEK                        | +3                       | 4.769      | 0.441         | 0.9999 1                   |                                |
|       | MASCOT:(PepMatched Observed.Hits Coverage)  |                          |            | 7             | 1                          | 29.78%                         |
|       | Seq                                         | Charge ObservedMS        | ExpectedMS | CalculatedMS  |                            | Pepscore PepHits               |
|       | MLVLDSDKR                                   | +2 538.79                | 1075.57    | 1075.57       | 0 46                       | 4                              |

Identified Human Platelet Proteins

|                          |    |        |         |         |         |      |    |   |
|--------------------------|----|--------|---------|---------|---------|------|----|---|
| YIHSADIIHR               | +3 | 408.89 | 1223.65 | 1223.64 | 0.01    | 52   | 8  |   |
| TLFPGTDHIDQLK            | +2 | 742.90 | 1483.78 | 1483.77 | 0.01    | 56   | 4  |   |
| NYIQSLAQMPK              | +2 | 646.84 | 1291.67 | 1291.66 | 0.01    | 59   | 3  |   |
| HENVIGLLDVFTPAR          | +2 | 840.98 | 1679.94 | 1679.90 | 0.04    | 119  | 10 |   |
| MNFANVFIGANPLAVDLLEK     | +3 | 726.06 | 2175.15 | 2175.14 | 0.01    | 54   | 2  |   |
| SLEEFNDVYLVTHLMGADLNNIVK | +3 |        | 912.14  | 2733.40 | 2733.37 | 0.03 | 59 | 2 |

No. 773. Protein IPI00370158 Matched (SEQUEST MASCOT) Y N emPAI Strategy.Hits 0.61 1 PepMatched(SEQUEST MASCOT) 2 0 SpectraMatched(SEQUEST MASCOT) 2 0

\*Des: RAS-related C3 botulinum substrate 2

SEQUEST:(PepMatched Observed.Hits Coverage) 2 1 6.12%  
 Seq Charge Xcor Delta Probility PepHits  
 TVFDEAIR +2 2.732 0.149 0.9521 1  
 GLKTVFDEAIR +3 3.602 0.208 0.9938 1  
 MASCOT:(PepMatched Observed.Hits Coverage)

No. 774. Protein IPI00203406 Matched (SEQUEST MASCOT) Y N emPAI Strategy.Hits 0.08 1 PepMatched(SEQUEST MASCOT) 2 0 SpectraMatched(SEQUEST MASCOT) 2 0

\*Des: Oxysterol-binding protein

SEQUEST:(PepMatched Observed.Hits Coverage) 2 1 2.89%  
 Seq Charge Xcor Delta Probility PepHits  
 NDFSISILR +2 3.045 0.429 0.9995 1  
 ITMPVIFNEPLSFLQR +2 4.580 0.597 1.0000 1  
 MASCOT:(PepMatched Observed.Hits Coverage)

No. 775. Protein IPI00190462 Matched (SEQUEST MASCOT) Y Y emPAI Strategy.Hits 0.24 1 PepMatched(SEQUEST MASCOT) 2 2 SpectraMatched(SEQUEST MASCOT) 3 8

\*Des: Serine/threonine protein phosphatase 2A, catalytic subunit, beta isoform

SEQUEST:(PepMatched Observed.Hits Coverage) 2 1 13.33%  
 Seq Charge Xcor Delta Probility PepHits  
 SPDTNYLFMGDYVDR +2 5.138 0.635 1.0000 1  
 GAGYTFGQDISETFNHANGLTLVSR +3 4.956 0.587 1.0000 2  
 MASCOT:(PepMatched Observed.Hits Coverage) 2 1 13.33%  
 Seq Charge ObservedMS ExpectedMS CalculatedMS Pepscore PepHits  
 SPDTNYLFMGDYVDR +2 896.90 1791.78 1791.78 0 84 4  
 GAGYTFGQDISETFNHANGLTLVSR +3 885.77 2654.28 2654.27 0.01 61 8

No. 776. Protein IPI00190392 Matched (SEQUEST MASCOT) Y N emPAI Strategy.Hits 0.26 1 PepMatched(SEQUEST MASCOT) 4 0 SpectraMatched(SEQUEST MASCOT) 6 0

\*Des: 51 kDa protein

SEQUEST:(PepMatched Observed.Hits Coverage) 4 1 13.47%  
 Seq Charge Xcor Delta Probility PepHits  
 MNVSPDVNYEELAR +2 3.588 0.402 0.9994 1  
 VDILDALLR +2 2.721 0.360 0.9969 2  
 TMLELLNQLDGFQNTQVK +3 3.500 0.251 0.9907 1  
 QTYFLPVIGLVDAEK +2 2.959 0.432 0.9987 2  
 MASCOT:(PepMatched Observed.Hits Coverage)

Identified Human Platelet Proteins

|             |                                             |                               |               |                    |                                 |                                     |     |         |
|-------------|---------------------------------------------|-------------------------------|---------------|--------------------|---------------------------------|-------------------------------------|-----|---------|
| No.<br>777. | Protein<br>IPI00324102                      | Matched (SEQUEST MASCOT)<br>Y | emPAI<br>0.37 | Strategy.Hits<br>4 | PepMatched(SEQUEST MASCOT)<br>4 | SpectraMatched(SEQUEST MASCOT)<br>5 | 15  | 25      |
| *Des:       | Prothrombinase FGL2                         |                               |               |                    |                                 |                                     |     |         |
|             | SEQUEST:(PepMatched Observed.Hits Coverage) |                               |               | 4                  | 8                               | 16.8%                               |     |         |
|             | Seq                                         | Charge                        | Xcor          | Delta              | Probility                       | PepHits                             |     |         |
|             | NAKEEIQGLQGR                                | +3                            |               | 3.696              | 0.268                           | 0.9986                              |     | 5       |
|             | TLQEAVDSLKK                                 | +2                            |               | 2.913              | 0.411                           | 0.9984                              |     | 4       |
|             | EFWLGNDKIHELLTK                             | +2                            |               | 4.412              | 0.487                           | 1.0000                              |     | 9       |
|             | NGIFWGTWPGVSAHPGGYK                         | +2                            |               | 4.496              | 0.515                           | 1.0000                              |     | 10      |
|             | MASCOT:(PepMatched Observed.Hits Coverage)  |                               |               | 5                  | 7                               | 19.28%                              |     |         |
|             | Seq                                         | Charge                        | ObservedMS    | ExpectedMS         | CalculatedMS                    | Pepscore                            |     | PepHits |
|             | AGFGNLER                                    | +2                            | 432.2249      | 862.4353           | 862.4297                        | 0.01                                | 59  | 8       |
|             | NAKEEIQGLQGR                                | +2                            | 671.8618      | 1341.7091          | 1341.7000                       | 0.01                                | 71  | 5       |
|             | TLQEAVDSLKK                                 | +2                            | 616.3517      | 1230.6889          | 1230.6819                       | 0.01                                | 46  | 2       |
|             | EFWLGNDKIHELLTK                             | +2                            | 857.4759      | 1712.9372          | 1712.9249                       | 0.01                                | 74  | 6       |
|             | NGIFWGTWPGVSAHPGGYK                         | +2                            | 1080.0363     | 2158.0580          | 2158.0384                       | 0.02                                | 74  | 11      |
| No.<br>778. | Protein<br>IPI00392151                      | Matched (SEQUEST MASCOT)<br>N | emPAI<br>0.23 | Strategy.Hits<br>1 | PepMatched(SEQUEST MASCOT)<br>0 | SpectraMatched(SEQUEST MASCOT)<br>3 | 0   | 5       |
| *Des:       | 59 kDa protein                              |                               |               |                    |                                 |                                     |     |         |
|             | SEQUEST:(PepMatched Observed.Hits Coverage) |                               |               | 3                  | 1                               | 8.48%                               |     |         |
|             | MASCOT:(PepMatched Observed.Hits Coverage)  |                               |               | 3                  | 1                               | 8.48%                               |     |         |
|             | Seq                                         | Charge                        | ObservedMS    | ExpectedMS         | CalculatedMS                    | Pepscore                            |     | PepHits |
|             | HKSETDTSLIR                                 | +2                            | 643.8428      | 1285.6710          | 1285.6626                       | 0.01                                | 43  | 1       |
|             | DGNVLLHEMQIQHPTASLIAK                       | +3                            | 772.4177      | 2314.2312          | 2314.2103                       | 0.02                                | 56  | 3       |
|             | GPNKHTLTQIK                                 | +2                            | 618.8608      | 1235.7070          | 1235.6986                       | 0.01                                | 44  | 1       |
| No.<br>779. | Protein<br>IPI00565497                      | Matched (SEQUEST MASCOT)<br>N | emPAI<br>0.88 | Strategy.Hits<br>1 | PepMatched(SEQUEST MASCOT)<br>0 | SpectraMatched(SEQUEST MASCOT)<br>4 | 0   | 15      |
| *Des:       | 46 kDa protein                              |                               |               |                    |                                 |                                     |     |         |
|             | SEQUEST:(PepMatched Observed.Hits Coverage) |                               |               | 4                  | 1                               | 13.52%                              |     |         |
|             | MASCOT:(PepMatched Observed.Hits Coverage)  |                               |               | 4                  | 1                               | 13.52%                              |     |         |
|             | Seq                                         | Charge                        | ObservedMS    | ExpectedMS         | CalculatedMS                    | Pepscore                            |     | PepHits |
|             | GVDVIAQAQSGTGK                              | +2                            | 697.8556      | 1393.6966          | 1393.6837                       | 0.01                                | 71  | 6       |
|             | MFVLDEADEMLSR                               | +2                            | 778.3652      | 1554.7159          | 1554.7058                       | 0.01                                | 100 | 5       |
|             | ATQALVLAPTR                                 | +2                            | 570.8439      | 1139.6732          | 1139.6662                       | 0.01                                | 43  | 3       |
|             | KGVAINMVTEEDKR                              | +3                            | 530.6196      | 1588.8369          | 1588.8242                       | 0.01                                | 45  | 1       |
| No.<br>780. | Protein<br>IPI00200794                      | Matched (SEQUEST MASCOT)<br>Y | emPAI<br>0.38 | Strategy.Hits<br>1 | PepMatched(SEQUEST MASCOT)<br>2 | SpectraMatched(SEQUEST MASCOT)<br>3 | 5   | 7       |
| *Des:       | L-xylulose reductase                        |                               |               |                    |                                 |                                     |     |         |
|             | SEQUEST:(PepMatched Observed.Hits Coverage) |                               |               | 2                  | 1                               | 14.45%                              |     |         |
|             | Seq                                         | Charge                        | Xcor          | Delta              | Probility                       | PepHits                             |     |         |
|             | GVPGAIVNVSSQASQR                            | +2                            |               | 5.037              | 0.545                           | 1.0000                              |     | 2       |
|             | FAEVENVVDITLFLLSNR                          | +2                            |               | 4.851              | 0.533                           | 1.0000                              |     | 3       |
|             | MASCOT:(PepMatched Observed.Hits Coverage)  |                               |               | 3                  | 1                               | 19.27%                              |     |         |

Identified Human Platelet Proteins

| Seq               | Charge | ObservedMS | ExpectedMS | CalculatedMS | Pepscore | PepHits |
|-------------------|--------|------------|------------|--------------|----------|---------|
| GVPGAIVNVSSQASQR  | +2     | 785.42     | 1568.83    | 1568.83      | 0        | 87      |
| AVVQVSQIVAR       | +2     | 585.32     | 1168.62    | 1168.69      | -0.06    | 42      |
| FAEVENVVDILFLLSNR | +3     | 693.71     | 2078.12    | 2078.10      | 0.02     | 46      |

No. 781. Protein IPI00325847 Matched (SEQUEST MASCOT) Y N emPAI 0.15 Strategy.Hits 1 PepMatched(SEQUEST MASCOT) 3 SpectraMatched(SEQUEST MASCOT) 0

\*Des: GPI-anchored ceruloplasmin

SEQUEST:(PepMatched Observed.Hits Coverage) 3 1 4.44%

| Seq                      | Charge | Xcor  | Delta | Proability | PepHits |
|--------------------------|--------|-------|-------|------------|---------|
| ALYSEYTDGTFK             | +2     | 3.031 | 0.426 | 0.9986     | 1       |
| AGLQAFFQVR               | +2     | 2.859 | 0.407 | 0.9985     | 2       |
| GPDEEHLGILGPVIWAEVGDIIIR | +3     | 4.883 | 0.449 | 1.0000     | 1       |

MASCOT:(PepMatched Observed.Hits Coverage)

No. 782. Protein IPI00358331 Matched (SEQUEST MASCOT) Y Y emPAI 0.14 Strategy.Hits 1 PepMatched(SEQUEST MASCOT) 2 SpectraMatched(SEQUEST MASCOT) 3

\*Des: PREDICTED: similar to dead end protein

SEQUEST:(PepMatched Observed.Hits Coverage) 2 1 3.37%

| Seq          | Charge | Xcor  | Delta | Proability | PepHits |
|--------------|--------|-------|-------|------------|---------|
| ASAEQIEEEVTK | +2     | 3.669 | 0.380 | 0.9995     | 1       |
| DQGGELLSLR   | +2     | 3.054 | 0.160 | 0.9637     | 1       |

MASCOT:(PepMatched Observed.Hits Coverage) 2 1 3.37%

| Seq          | Charge | ObservedMS | ExpectedMS | CalculatedMS | Pepscore | PepHits |
|--------------|--------|------------|------------|--------------|----------|---------|
| ASAEQIEEEVTK | +2     | 667.33     | 1332.65    | 1332.64      | 0.01     | 64      |
| DQGGELLSLR   | +2     | 544.29     | 1086.57    | 1086.57      | 0        | 59      |

No. 783. Protein IPI00358404 Matched (SEQUEST MASCOT) Y Y emPAI 0.23 Strategy.Hits 1 PepMatched(SEQUEST MASCOT) 2 SpectraMatched(SEQUEST MASCOT) 3

\*Des: Eukaryotic translation termination factor 1

SEQUEST:(PepMatched Observed.Hits Coverage) 2 1 5.84%

| Seq           | Charge | Xcor  | Delta | Proability | PepHits |
|---------------|--------|-------|-------|------------|---------|
| FGATLEIVTDK   | +2     | 2.810 | 0.438 | 0.9991     | 2       |
| LSVLGAITSVQQR | +2     | 3.103 | 0.396 | 0.9818     | 1       |

MASCOT:(PepMatched Observed.Hits Coverage) 2 1 5.84%

| Seq           | Charge | ObservedMS | ExpectedMS | CalculatedMS | Pepscore | PepHits |
|---------------|--------|------------|------------|--------------|----------|---------|
| FGATLEIVTDK   | +2     | 597.33     | 1192.64    | 1192.63      | 0.01     | 58      |
| LSVLGAITSVQQR | +2     | 687.36     | 1372.71    | 1370.79      | 1.92     | 46      |

No. 784. Protein IPI00551592 Matched (SEQUEST MASCOT) Y Y emPAI 0.47 Strategy.Hits 2 PepMatched(SEQUEST MASCOT) 2 SpectraMatched(SEQUEST MASCOT) 17

\*Des: Myosin regulatory light chain 2-A, smooth muscle isoform

SEQUEST:(PepMatched Observed.Hits Coverage) 2 1 28.73%

| Seq                            | Charge | Xcor  | Delta | Proability | PepHits |
|--------------------------------|--------|-------|-------|------------|---------|
| DGFIDKEDLHDM LASMGK            | +2     | 5.640 | 0.641 | 1.0000     | 3       |
| NPTDEYLDAMMNEAPGPINFTMFLTMFGEK | +3     | 6.548 | 0.443 | 1.0000     | 14      |

MASCOT:(PepMatched Observed.Hits Coverage) 2 1 13.21%

|             |        | Identified Human Platelet Proteins |            |              |      |    |    |          |         |
|-------------|--------|------------------------------------|------------|--------------|------|----|----|----------|---------|
| Seq         | Charge | ObservedMS                         | ExpectedMS | CalculatedMS |      |    |    | Pepscore | PepHits |
| GNFNYIEFTR  | +2     | 630.8568                           | 1259.6990  | 1259.5934    | 0.11 | 52 | 15 |          |         |
| LNGTDPEDVIR | +2     | 614.8630                           | 1227.7114  | 1227.6095    | 0.1  | 85 | 29 |          |         |

No. 785. Protein IPI00207550 Matched (SEQUEST MASCOT) N Y emPAI 2.17 Strategy.Hits 4 PepMatched(SEQUEST MASCOT) 0 SpectraMatched(SEQUEST MASCOT) 4153

\*Des: PREDICTED: similar to Actin, cytoplasmic 2 (Gamma-actin)

SEQUEST:(PepMatched Observed.Hits Coverage)

MASCOT:(PepMatched Observed.Hits Coverage)

| Seq                                 | Charge | ObservedMS | ExpectedMS | CalculatedMS |           |      |     | Pepscore | PepHits |
|-------------------------------------|--------|------------|------------|--------------|-----------|------|-----|----------|---------|
| AGFAGDDAPR                          | +2     | 488.7993   | 975.5841   | 975.4410     | 0.14      | 91   | 567 |          |         |
| CDVDIRK                             | +2     | 424.7206   | 847.4267   | 847.4222     | 0         | 44   | 6   |          |         |
| DSYVGDEAQSK                         | +2     | 599.7686   | 1197.5227  | 1197.5149    | 0.01      | 78   | 28  |          |         |
| SYELPDGQVITIGNER                    | +2     | 815.4221   | 895.9565   | 1789.8984    | 1789.8846 | 0.01 | 115 | 1554     |         |
| GYSFTTTAEREIVR                      | +2     | 815.4221   | 1628.8296  | 1628.8158    | 0.01      | 53   | 28  |          |         |
| VAPEEHPVLLTEAPLNPK                  | +2     | 977.5460   | 1953.0775  | 1953.0571    | 0.02      | 96   | 72  |          |         |
| DLTDYLMK                            | +2     | 499.7492   | 997.4839   | 997.4790     | 0         | 62   | 181 |          |         |
| DSYVGDEAQSKR                        | +2     | 677.8203   | 1353.6261  | 1353.6160    | 0.01      | 91   | 280 |          |         |
| EITALAPSTMK                         | +2     | 581.5111   | 1161.0077  | 1160.6111    | 0.4       | 84   | 849 |          |         |
| GYSFTTTAER                          | +2     | 565.7974   | 1129.5802  | 1131.5196    | -1.93     | 75   | 183 |          |         |
| LDLAGRDLTDYLMK                      | +2     | 812.4302   | 1622.8458  | 1622.8338    | 0.01      | 49   | 308 |          |         |
| QEYDESGSIVHR                        | +3     | 506.2422   | 1515.7047  | 1515.6953    | 0.01      | 58   | 89  |          |         |
| QEYDESGSIVHRK                       | +2     | 822.9086   | 1643.8027  | 1643.7903    | 0.01      | 60   | 19  |          |         |
| KDLYANTVLSGGTTMYPGIADR              | +2     | 1172.0969  | 2342.1793  | 2342.1576    | 0.02      | 121  | 10  |          |         |
| HQGVVMVGMGQK                        | +2     | 585.5645   | 1169.1145  | 1170.5637    | -1.44     | 83   | 763 |          |         |
| HQGVVMVGMGQKDSYVGDEAQSKR            | +2     | 1254.1031  | 2506.1917  | 2506.1692    | 0.02      | 110  | 476 |          |         |
| MQKEITALAPSTMK                      | +2     | 774.9154   | 1547.8163  | 1547.8051    | 0.01      | 86   | 141 |          |         |
| IWHHTFYNELR                         | +2     | 758.3823   | 1514.7500  | 1514.7419    | 0.01      | 41   | 12  |          |         |
| AVFPSIVGRPR                         | +2     | 599.9666   | 1197.9186  | 1197.6982    | 0.22      | 86   | 894 |          |         |
| YSVWIGGSILASLSTFQQMWISKQEYDESGSIVHR | +3     | 1367.3589  | 4099.0548  | 4099.0148    | 0.04      | 141  | 25  |          |         |
| MTQIMFETFNTPAMYVAIQAVLSLYASGR       | +3     | 1085.2173  | 3252.6300  | 3252.6021    | 0.03      | 93   | 36  |          |         |
| IIAPPERK                            | +2     | 461.8878   | 921.7611   | 922.5600     | -0.79     | 52   | 497 |          |         |
| MQKEITALAPSTMKIK                    | +2     | 895.5047   | 1788.9948  | 1788.9841    | 0.01      | 74   | 25  |          |         |
| VAPEEHPVLLTEAPLNPKANREK             | +3     | 851.4714   | 2551.3925  | 2551.3757    | 0.02      | 41   | 3   |          |         |
| VAPEEHPVLLTEAPLNPKANR               | +3     | 765.7600   | 2294.2582  | 2294.2382    | 0.02      | 63   | 7   |          |         |

No. 786. Protein IPI00209082 Matched (SEQUEST MASCOT) Y Y emPAI 0.46 Strategy.Hits 5 PepMatched(SEQUEST MASCOT) 31 SpectraMatched(SEQUEST MASCOT) 158

\*Des: Alpha-actinin 1

SEQUEST:(PepMatched Observed.Hits Coverage)

| Seq                   | Charge | Xcor  | Delta | Probability | PepHits |
|-----------------------|--------|-------|-------|-------------|---------|
| DHSGTLGPEEFK          | +2     | 2.857 | 0.368 | 0.9970      | 1       |
| LSNRPAFMPSEGR         | +2     | 3.188 | 0.486 | 0.9997      | 4       |
| GISQEQMNEFR           | +2     | 3.411 | 0.483 | 0.9998      | 3       |
| NYITGDELR             | +2     | 2.744 | 0.268 | 0.9825      | 3       |
| QKDYETATLSEIK         | +2     | 3.119 | 0.416 | 0.9751      | 3       |
| ASFNHFD RDHSGTLGPEEFK | +3     | 4.222 | 0.327 | 0.9908      | 1       |



Identified Human Platelet Proteins

| Seq                                        | Charge | ObservedMS | ExpectedMS | CalculatedMS | Pepscore | PepHits |    |  |
|--------------------------------------------|--------|------------|------------|--------------|----------|---------|----|--|
| IMSIVDPNR                                  | +2     | 2.891      | 0.234      | 0.9885       | 2        |         |    |  |
| ILAGDKNYITGDELRR                           | +2     | 4.582      | 0.446      | 0.9973       | 3        |         |    |  |
| LAILGIHNEVSK                               | +2     | 3.639      | 0.436      | 0.9997       | 6        |         |    |  |
| MLDAEDIVGTARPDEK                           | +2     | 3.699      | 0.414      | 0.9995       | 4        |         |    |  |
| TINEVENQILTR                               | +2     | 3.282      | 0.349      | 0.9983       | 2        |         |    |  |
| VLAVNQENEQLMEDYEK                          | +2     | 5.652      | 0.536      | 1.0000       | 3        |         |    |  |
| IVQTYHVNMAAGTNPYTTITPQEINGK                | +3     | 4.748      | 0.534      | 1.0000       | 2        | 0.9999  |    |  |
| LVSIGAEIIVDGNVK                            | +2     | 4.748      | 0.534      | 1.0000       | 2        |         |    |  |
| RDQALTEEHSR                                | +3     | 3.503      | 0.279      | 0.9986       | 1        |         |    |  |
| ETADTDTADQVMASFK                           | +2     | 5.266      | 0.646      | 1.0000       | 4        |         |    |  |
| ISIEMHGTLEDQLSHLR                          | +2     | 4.940      | 0.603      | 1.0000       | 5        |         |    |  |
| NVNIQNFHISWK                               | +2     | 4.012      | 0.456      | 0.9999       | 2        |         |    |  |
| KDDPLTNLNTAFDVAER                          | +2     | 4.689      | 0.567      | 1.0000       | 4        |         |    |  |
| QFGAQANVIGPWQTK                            | +2     | 3.606      | 0.315      | 0.9973       | 1        |         |    |  |
| AGTQIENIEEDFRDGLK                          | +2     | 4.332      | 0.440      | 0.9961       | 2        |         |    |  |
| IDQLEGDHQLIQEALIFDNK                       | +2     | 5.638      | 0.589      | 1.0000       | 3        |         |    |  |
| KHEAFESDLAAHQDR                            | +3     | 3.791      | 0.501      | 1.0000       | 2        |         |    |  |
| VEQIAAIAQELNELDYDPSVNR                     | +3     | 6.111      | 0.579      | 1.0000       | 3        |         |    |  |
| LLETIDQLYLEYAK                             | +2     | 5.231      | 0.549      | 1.0000       | 3        |         |    |  |
| AIMTYVSSFYHAFSGAQK                         | +2     | 5.322      | 0.584      | 1.0000       | 1        |         |    |  |
| LASDLLEWIR                                 | +2     | 3.304      | 0.308      | 0.9981       | 2        |         |    |  |
| VGWEQLLTTIAR                               | +2     | 3.904      | 0.454      | 0.9999       | 3        |         |    |  |
| VPENTMQAMQK                                | +2     | 3.567      | 0.380      | 0.9994       | 1        |         |    |  |
| LGVVTFQAFIDFMSR                            | +2     | 5.284      | 0.586      | 1.0000       | 6        |         |    |  |
| IMSIVDPNRLGVVTFQAFIDFMSR                   | +3     | 4.533      | 0.570      | 1.0000       | 4        |         |    |  |
| MASCOT:(PepMatched Observed.Hits Coverage) |        | 16         | 9          | 26.13%       |          |         |    |  |
| TINEVENQILTR                               | +2     | 716.3560   | 1430.6974  | 1428.7572    | 1.94     | 77      | 8  |  |
| LVSIGAEIIVDGNVK                            | +2     | 771.9271   | 1541.8396  | 1541.8300    | 0.01     | 63      | 4  |  |
| MLDAEDIVGTARPDEK                           | +2     | 880.4343   | 1758.8540  | 1758.8458    | 0.01     | 77      | 20 |  |
| ALDFIASK                                   | +2     | 432.7474   | 863.4803   | 863.4752     | 0.01     | 56      | 11 |  |
| FAIQDISVEETSAK                             | +2     | 769.3969   | 1536.7792  | 1536.7671    | 0.01     | 81      | 18 |  |
| KDDPLTNLNTAFDVAER                          | +2     | 959.9879   | 1917.9612  | 1917.9432    | 0.02     | 127     | 4  |  |
| AGTQIENIEEDFRDGLK                          | +2     | 967.9816   | 1933.9486  | 1933.9381    | 0.01     | 71      | 2  |  |
| VGWEQLLTTIAR                               | +2     | 693.8954   | 1385.7763  | 1385.7667    | 0.01     | 80      | 12 |  |
| LMLLLEVISGER                               | +2     | 686.9023   | 1371.7901  | 1371.7795    | 0.01     | 87      | 91 |  |
| RDQALTEEHSR                                | +3     | 447.8917   | 1340.6533  | 1340.6433    | 0.01     | 60      | 4  |  |
| ILAGDKNYITGDELRR                           | +2     | 917.5018   | 1832.9890  | 1832.9744    | 0.01     | 47      | 28 |  |
| LAILGIHNEVSK                               | +2     | 648.3389   | 1294.6632  | 1292.7452    | 1.92     | 66      | 24 |  |
| TIPWLENRPENTMQAMQK                         | +3     | 805.4089   | 2413.2050  | 2413.1882    | 0.02     | 44      | 6  |  |
| HRPELIDYGK                                 | +3     | 409.8900   | 1226.6482  | 1226.6407    | 0.01     | 45      | 26 |  |
| QFGAQANVIGPWQTK                            | +2     | 879.4825   | 1756.9504  | 1756.9260    | 0.02     | 70      | 6  |  |
| LSNRPAFMPSEGR                              | +2     | 731.3718   | 1460.7291  | 1460.7194    | 0.01     | 47      | 4  |  |

No. 787. IPI00371972 Y Y 0.22 1 3 4 6 7  
 \*Des: PREDICTED: similar to chromosome 10 open reading frame 42

Identified Human Platelet Proteins

| SEQUEST:(PepMatched Observed.Hits Coverage) |        | 3          | 1          | 7.22%        |         |          |         |
|---------------------------------------------|--------|------------|------------|--------------|---------|----------|---------|
| Seq                                         | Charge | Xcor       | Delta      | Probility    | PepHits |          |         |
| DLLSHENAETLNDVK                             |        |            | +2         | 4.464        | 0.503   | 0.9999   | 3       |
| DAIAQAEMDLK                                 | +2     |            | 2.982      | 0.354        | 0.9955  |          | 2       |
| VAASTGIDLLLLDDFK                            | +2     |            |            | 5.009        | 0.564   | 1.0000   | 2       |
| MASCOT:(PepMatched Observed.Hits Coverage)  |        | 4          | 1          | 9.3%         |         |          |         |
| Seq                                         | Charge | ObservedMS | ExpectedMS | CalculatedMS |         | Pepscore | PepHits |
| DLLSHENAETLNDVK                             | +2     | 849.43     | 1696.84    | 1696.83      | 0.01    | 86       | 3       |
| DAIAQAEMDLK                                 | +2     | 602.80     | 1203.58    | 1203.58      | 0       | 68       | 2       |
| LRDPLQVHLPLR                                | +3     | 486.30     | 1455.86    | 1455.87      | 0       | 53       | 2       |
| VAASTGIDLLLLDDFK                            | +2     | 845.97     | 1689.93    | 1689.92      | 0.01    | 80       | 2       |

No. 788. Protein IPI00188338 Matched (SEQUEST MASCOT) Y Y emPAI 0.29 Strategy.Hits 3 PepMatched(SEQUEST MASCOT) 3 SpectraMatched(SEQUEST MASCOT) 8 3 39  
 \*Des: PREDICTED: similar to inter-alpha trypsin inhibitor, heavy chain 1

| SEQUEST:(PepMatched Observed.Hits Coverage) |        | 3          | 2          | 5.23%        |         |          |         |
|---------------------------------------------|--------|------------|------------|--------------|---------|----------|---------|
| Seq                                         | Charge | Xcor       | Delta      | Probility    | PepHits |          |         |
| KAAISGENAGLVR                               | +2     |            | 3.020      | 0.407        | 0.9981  |          | 3       |
| GSLVPASHANLQAAQDFVR                         | +2     |            | 4.911      | 0.553        | 1.0000  | 1        |         |
| FSLAGATNLNGGLLR                             | +2     |            |            | 2.779        | 0.334   | 0.9891   | 1       |
| MASCOT:(PepMatched Observed.Hits Coverage)  |        | 8          | 3          | 11.62%       |         |          |         |
| Seq                                         | Charge | ObservedMS | ExpectedMS | CalculatedMS |         | Pepscore | PepHits |
| AAISGENAGLVR                                | +2     | 579.32     | 1156.63    | 1156.62      | 0.01    | 77       | 6       |
| LWAYLTIQELLAK                               | +2     | 781.46     | 1560.90    | 1560.89      | 0.01    | 75       | 4       |
| QAVDTTVNGVSIR                               | +2     | 680.37     | 1358.72    | 1358.72      | 0       | 73       | 1       |
| QYYDGSEIVVAGR                               | +2     | 728.86     | 1455.71    | 1455.70      | 0.01    | 66       | 10      |
| FAHYVITSQVVNSANK                            | +2     |            | 889.47     | 1776.93      | 1776.92 | 0.01     | 96      |
| VNCKVTSRFAHYVITSQVVNSANK                    | +3     |            | 889.47     | 2665.39      | 2664.38 | 1.01     | 43      |
| LDAQASFSLK                                  | +2     | 540.29     | 1078.57    | 1078.57      | 0       | 61       | 18      |
| GSLVPASHANLQAAQDFVR                         | +2     | 991.02     | 1980.03    | 1980.02      | 0.01    | 90       | 4       |

No. 789. Protein IPI00213033 Matched (SEQUEST MASCOT) Y N emPAI 0.92 Strategy.Hits 2 PepMatched(SEQUEST MASCOT) 3 SpectraMatched(SEQUEST MASCOT) 0 4 0  
 \*Des: 15 kDa protein

| SEQUEST:(PepMatched Observed.Hits Coverage) |        | 3    | 2     | 30.76%    |         |  |   |
|---------------------------------------------|--------|------|-------|-----------|---------|--|---|
| Seq                                         | Charge | Xcor | Delta | Probility | PepHits |  |   |
| VIKDFMIQGGDFTR                              | +2     |      | 4.274 | 0.627     | 0.9961  |  | 2 |
| TVDNFVALATGEK                               | +2     |      | 2.862 | 0.381     | 0.9563  |  | 1 |
| VYFDFQIGDEPVGR                              | +2     |      | 3.084 | 0.487     | 0.9875  |  | 1 |
| MASCOT:(PepMatched Observed.Hits Coverage)  |        |      |       |           |         |  |   |

No. 790. Protein IPI00215574 Matched (SEQUEST MASCOT) Y Y emPAI 0.79 Strategy.Hits 1 PepMatched(SEQUEST MASCOT) 5 SpectraMatched(SEQUEST MASCOT) 3 10 8  
 \*Des: 3,2-trans-enoyl-CoA isomerase, mitochondrial precursor

| SEQUEST:(PepMatched Observed.Hits Coverage) |        | 5    | 1     | 28.23%    |         |        |   |
|---------------------------------------------|--------|------|-------|-----------|---------|--------|---|
| Seq                                         | Charge | Xcor | Delta | Probility | PepHits |        |   |
| ALQLGTLFPPAEALK                             | +2     |      |       | 4.628     | 0.378   | 0.9999 | 1 |



Identified Human Platelet Proteins

794. IPI00208286 Y Y 1.09 1 4 3 7 18

\*Des: Ubiquitin carboxyl-terminal hydrolase I3

| SEQUEST:(PepMatched Observed.Hits Coverage) |                   | 4          | 1            | 28.63%  |          |         |    |
|---------------------------------------------|-------------------|------------|--------------|---------|----------|---------|----|
| Seq                                         | Charge Xcor       | Delta      | Proability   | PepHits |          |         |    |
| FLEESVAMSPEER                               | +2                | 3.690      | 0.303        | 0.9986  | 2        |         |    |
| VTHETSAHEGQTEAPSIDEK                        | +3                | 5.717      | 0.557        | 1.0000  | 1        |         |    |
| SQGQDVTSSVYFMK                              | +2                | 3.848      | 0.535        | 1.0000  | 2        |         |    |
| WLPLEANPEVTNQFLK                            | +2                | 4.292      | 0.503        | 1.0000  | 3        |         |    |
| MASCOT:(PepMatched Observed.Hits Coverage)  |                   | 3          | 1            | 22.64%  |          |         |    |
| Seq                                         | Charge ObservedMS | ExpectedMS | CalculatedMS |         | PepScore | PepHits |    |
| VTHETSAHEGQTEAPSIDEK                        | +3                | 722.68     | 2165.01      | 2164.99 | 0.02     | 67      | 2  |
| SQGQDVTSSVYFMK                              | +2                | 788.87     | 1575.73      | 1575.72 | 0.01     | 73      | 8  |
| WLPLEANPEVTNQFLK                            | +2                | 950.01     | 1898.01      | 1897.99 | 0.02     | 61      | 12 |

No. Protein Matched (SEQUEST MASCOT) emPAI Strategy.Hits PepMatched(SEQUEST MASCOT) SpectraMatched(SEQUEST MASCOT)

795. IPI00360541 Y Y 0.24 1 4 4 5 5

\*Des: PREDICTED: similar to CD18 antigen preprotein

| SEQUEST:(PepMatched Observed.Hits Coverage) |                   | 4          | 1            | 8.45%   |          |         |   |
|---------------------------------------------|-------------------|------------|--------------|---------|----------|---------|---|
| Seq                                         | Charge Xcor       | Delta      | Proability   | PepHits |          |         |   |
| SFADLHPQYQVQR                               | +2                | 3.525      | 0.432        | 0.9996  | 2        |         |   |
| SAVGELSDSSNVVQLIK                           | +2                | 3.699      | 0.431        | 0.9996  | 1        |         |   |
| LGGDLLQALNEITESGR                           | +2                | 4.538      | 0.584        | 1.0000  | 1        |         |   |
| LTDNSNQFQTEVGK                              | +2                | 3.719      | 0.531        | 0.9999  | 1        |         |   |
| MASCOT:(PepMatched Observed.Hits Coverage)  |                   | 4          | 1            | 8.45%   |          |         |   |
| Seq                                         | Charge ObservedMS | ExpectedMS | CalculatedMS |         | PepScore | PepHits |   |
| LTDNSNQFQTEVGK                              | +2                | 790.88     | 1579.75      | 1579.75 | 0        | 65      | 1 |
| SFADLHPQYQVQR                               | +2                | 794.90     | 1587.79      | 1587.78 | 0.01     | 53      | 2 |
| SAVGELSDSSNVVQLIK                           | +2                | 930.99     | 1859.96      | 1859.95 | 0.01     | 63      | 1 |
| LGGDLLQALNEITESGR                           | +2                | 893.47     | 1784.93      | 1784.93 | 0        | 69      | 1 |

No. Protein Matched (SEQUEST MASCOT) emPAI Strategy.Hits PepMatched(SEQUEST MASCOT) SpectraMatched(SEQUEST MASCOT)

796. IPI00362072 Y Y 2.2 4 7 7 24 35

\*Des: Actin-like protein 2

| SEQUEST:(PepMatched Observed.Hits Coverage) |                   | 7          | 4            | 25.68%  |          |         |   |
|---------------------------------------------|-------------------|------------|--------------|---------|----------|---------|---|
| Seq                                         | Charge Xcor       | Delta      | Proability   | PepHits |          |         |   |
| SMLEVNYPMENGIVR                             | +2                | 4.832      | 0.463        | 1.0000  | 3        |         |   |
| GYAFNHSADFETVR                              | +2                | 3.773      | 0.549        | 1.0000  | 3        |         |   |
| RLDIAGR                                     | +2                | 3.122      | 0.187        | 0.9918  | 7        |         |   |
| KVVVCDNGTGFVK                               | +2                | 3.117      | 0.444        | 0.9990  | 1        |         |   |
| ILLTEPPMNPTK                                | +2                | 2.991      | 0.530        | 0.9997  | 5        |         |   |
| HMVFLGGAVLADIMK                             | +2                | 5.066      | 0.607        | 1.0000  | 10       |         |   |
| HIVLSGGSTMYPGLPSRLER                        | +3                | 3.516      | 0.572        | 1.0000  | 2        |         |   |
| MASCOT:(PepMatched Observed.Hits Coverage)  |                   | 7          | 4            | 27.43%  |          |         |   |
| Seq                                         | Charge ObservedMS | ExpectedMS | CalculatedMS |         | PepScore | PepHits |   |
| DLMVGDEASELR                                | +2                | 667.82     | 1333.63      | 1333.62 | 0.01     | 47      | 1 |
| ILLTEPPMNPTK                                | +2                | 677.38     | 1352.75      | 1352.74 | 0.01     | 45      | 1 |
| GYAFNHSADFETVR                              | +2                | 807.38     | 1612.74      | 1612.73 | 0.01     | 70      | 3 |

Identified Human Platelet Proteins

|                    |    |        |         |         |      |     |   |
|--------------------|----|--------|---------|---------|------|-----|---|
| HIVLSGGSTMYPGLPSR  | +2 | 886.47 | 1770.92 | 1770.91 | 0.01 | 83  | 3 |
| SMLEVNYPMENGIVR    | +2 | 876.43 | 1750.85 | 1750.84 | 0.01 | 65  | 6 |
| LALETTVLVESYTLPDGR | +2 | 989.04 | 1976.06 | 1976.05 | 0.01 | 60  | 3 |
| HMVFLGGAVLADIMK    | +2 | 801.44 | 1600.86 | 1600.85 | 0.01 | 106 | 3 |

No. 797. Protein IPI00213036 Matched (SEQUEST MASCOT) Y N emPAI Strategy.Hits 0.04 1 2 0 2 0 SpectraMatched(SEQUEST MASCOT)

\*Des: Complement C4 precursor

|                                             |       |       |                |
|---------------------------------------------|-------|-------|----------------|
| SEQUEST:(PepMatched Observed.Hits Coverage) | 2     | 2     | 2.49%          |
| Seq Charge Xcor Delta Probility PepHits     |       |       |                |
| ILSLAQEQIGDSPEK +2                          | 5.073 | 0.604 | 1.0000 1       |
| NPSEVPQAPALWIETTAYGLLHLLLR                  | +3    | 4.369 | 0.588 1.0000 2 |
| MASCOT:(PepMatched Observed.Hits Coverage)  |       |       |                |

No. 798. Protein IPI00559080 Matched (SEQUEST MASCOT) Y Y emPAI Strategy.Hits 0.13 1 2 2 5 6 SpectraMatched(SEQUEST MASCOT)

\*Des: PREDICTED: similar to Nicotinamide nucleotide adenylyltransferase 3

|                                                                |          |           |                     |
|----------------------------------------------------------------|----------|-----------|---------------------|
| SEQUEST:(PepMatched Observed.Hits Coverage)                    | 2        | 1         | 11.2%               |
| Seq Charge Xcor Delta Probility PepHits                        |          |           |                     |
| DSHIQEIVEK +2                                                  | 2.746    | 0.305     | 0.9965 2            |
| VDPWESEQAQWMETVK +2                                            | 5.194    | 0.526     | 1.0000 4            |
| MASCOT:(PepMatched Observed.Hits Coverage)                     | 2        | 1         | 11.2%               |
| Seq Charge ObservedMS ExpectedMS CalculatedMS Pepscore PepHits |          |           |                     |
| DSHIQEIVEK +2                                                  | 599.3203 | 1196.6261 | 1196.6037 0.02 41 2 |
| VDPWESEQAQWMETVK +2                                            | 981.9713 | 1961.9280 | 1961.8829 0.05 84 4 |

No. 799. Protein IPI00476630 Matched (SEQUEST MASCOT) N Y emPAI Strategy.Hits 0.22 1 0 2 0 5 SpectraMatched(SEQUEST MASCOT)

\*Des: 31 kDa protein

|                                                                |          |           |                     |
|----------------------------------------------------------------|----------|-----------|---------------------|
| SEQUEST:(PepMatched Observed.Hits Coverage)                    |          |           |                     |
| MASCOT:(PepMatched Observed.Hits Coverage)                     | 2        | 1         | 10.56%              |
| Seq Charge ObservedMS ExpectedMS CalculatedMS Pepscore PepHits |          |           |                     |
| SEFIGLQLLDILTR +2                                              | 809.4698 | 1616.9250 | 1616.9137 0.01 84 5 |
| QLSQALDTSNVMVK+2                                               | 768.3745 | 1534.7343 | 1532.7868 1.95 54 1 |

No. 800. Protein IPI00476704 Matched (SEQUEST MASCOT) N Y emPAI Strategy.Hits 0.23 1 0 5 0 20 SpectraMatched(SEQUEST MASCOT)

\*Des: 111 kDa protein

|                                                                |          |           |                      |
|----------------------------------------------------------------|----------|-----------|----------------------|
| SEQUEST:(PepMatched Observed.Hits Coverage)                    |          |           |                      |
| MASCOT:(PepMatched Observed.Hits Coverage)                     | 5        | 1         | 8.38%                |
| Seq Charge ObservedMS ExpectedMS CalculatedMS Pepscore PepHits |          |           |                      |
| MLDYEMLQR +2                                                   | 599.7880 | 1197.5614 | 1197.5522 0.01 42 4  |
| ATLNSGPGAQQK +2                                                | 586.3111 | 1170.6076 | 1170.5993 0.01 48 12 |
| ALVEGIKMEHQLELGNLQAK +3                                        | 741.0787 | 2220.2144 | 2220.1935 0.02 43 1  |
| KISGTTALQEALKEK +3                                             | 539.6492 | 1615.9259 | 1615.9144 0.01 51 8  |
| HSSPVGRPSIGSASSSVVASASGSK +3                                   | 767.0664 | 2298.1774 | 2298.1563 0.02 50 2  |

**Identified Human Platelet Proteins**

|              |                                                                                                                         |                                 |              |                      |                                   |                                       |          |         |  |
|--------------|-------------------------------------------------------------------------------------------------------------------------|---------------------------------|--------------|----------------------|-----------------------------------|---------------------------------------|----------|---------|--|
| <b>No.</b>   | <b>Protein</b>                                                                                                          | <b>Matched (SEQUEST MASCOT)</b> | <b>emPAI</b> | <b>Strategy.Hits</b> | <b>PepMatched(SEQUEST MASCOT)</b> | <b>SpectraMatched(SEQUEST MASCOT)</b> |          |         |  |
| 801.         | IPI00205957                                                                                                             | N Y                             | 0.3          | 1                    | 0 2 0                             | 6                                     |          |         |  |
| <b>*Des:</b> | 30 kDa protein                                                                                                          |                                 |              |                      |                                   |                                       |          |         |  |
|              | SEQUEST:(PepMatched Observed.Hits Coverage)                                                                             |                                 |              |                      |                                   |                                       |          |         |  |
|              | MASCOT:(PepMatched Observed.Hits Coverage)                                                                              |                                 |              |                      |                                   |                                       |          |         |  |
|              | Seq                                                                                                                     | Charge                          | ObservedMS   | ExpectedMS           | CalculatedMS                      |                                       | PepScore | PepHits |  |
|              | VLALIQAWADAFR                                                                                                           | +2                              | 737.4160     | 1472.8175            | 1472.8139                         | 0 74                                  |          | 3       |  |
|              | KGIEFPMADLDALSPIHTPQR                                                                                                   | +3                              | 779.9518     | 2336.8337            | 2335.1994                         | 1.63 60                               |          | 3       |  |
|              |                                                                                                                         |                                 |              |                      |                                   |                                       |          |         |  |
| <b>No.</b>   | <b>Protein</b>                                                                                                          | <b>Matched (SEQUEST MASCOT)</b> | <b>emPAI</b> | <b>Strategy.Hits</b> | <b>PepMatched(SEQUEST MASCOT)</b> | <b>SpectraMatched(SEQUEST MASCOT)</b> |          |         |  |
| 802.         | IPI00370169                                                                                                             | Y Y                             | 0.14         | 1                    | 2 2 2                             | 2                                     |          |         |  |
| <b>*Des:</b> | PREDICTED: similar to adaptor protein Gads                                                                              |                                 |              |                      |                                   |                                       |          |         |  |
|              | SEQUEST:(PepMatched Observed.Hits Coverage)                                                                             |                                 |              |                      |                                   |                                       |          |         |  |
|              | Seq                                                                                                                     | Charge                          | Xcor         | Delta                | Probability                       | PepHits                               |          |         |  |
|              | ASQSSPGDFSISVR                                                                                                          | +2                              | 3.489        | 0.550                | 0.9999                            | 1                                     |          |         |  |
|              | ALYDFEALAEDELGLR                                                                                                        | +2                              | 4.593        | 0.552                | 1.0000                            | 1                                     |          |         |  |
|              | MASCOT:(PepMatched Observed.Hits Coverage)                                                                              |                                 |              |                      |                                   |                                       |          |         |  |
|              | Seq                                                                                                                     | Charge                          | ObservedMS   | ExpectedMS           | CalculatedMS                      |                                       | PepScore | PepHits |  |
|              | ASQSSPGDFSISVR                                                                                                          | +2                              | 719.36       | 1436.70              | 1436.69                           | 0.01 59                               |          | 1       |  |
|              | ALYDFEALAEDELGLR                                                                                                        | +2                              | 941.96       | 1881.91              | 1881.90                           | 0.01 71                               |          | 1       |  |
|              |                                                                                                                         |                                 |              |                      |                                   |                                       |          |         |  |
| <b>No.</b>   | <b>Protein</b>                                                                                                          | <b>Matched (SEQUEST MASCOT)</b> | <b>emPAI</b> | <b>Strategy.Hits</b> | <b>PepMatched(SEQUEST MASCOT)</b> | <b>SpectraMatched(SEQUEST MASCOT)</b> |          |         |  |
| 803.         | IPI00202616                                                                                                             | Y Y                             | 0.71         | 1                    | 4 3 8                             | 7                                     |          |         |  |
| <b>*Des:</b> | PREDICTED: similar to NADH-ubiquinone oxidoreductase 30 kDa subunit, mitochondrial precursor (Complex I-30KD) (CI-30KD) |                                 |              |                      |                                   |                                       |          |         |  |
|              | SEQUEST:(PepMatched Observed.Hits Coverage)                                                                             |                                 |              |                      |                                   |                                       |          |         |  |
|              | Seq                                                                                                                     | Charge                          | Xcor         | Delta                | Probability                       | PepHits                               |          |         |  |
|              | LSAFGEYVAEILPK                                                                                                          | +2                              | 4.266        | 0.439                | 0.9999                            | 2                                     |          |         |  |
|              | FEIVYNLLSLR                                                                                                             | +2                              | 3.200        | 0.393                | 0.9995                            | 3                                     |          |         |  |
|              | VVAEPVELAQEFR                                                                                                           | +2                              | 3.294        | 0.556                | 1.0000                            | 2                                     |          |         |  |
|              | DFPLTGYVELR                                                                                                             | +2                              | 3.113        | 0.470                | 0.9998                            | 6                                     |          |         |  |
|              | MASCOT:(PepMatched Observed.Hits Coverage)                                                                              |                                 |              |                      |                                   |                                       |          |         |  |
|              | Seq                                                                                                                     | Charge                          | ObservedMS   | ExpectedMS           | CalculatedMS                      |                                       | PepScore | PepHits |  |
|              | VVAEPVELAQEFR                                                                                                           | +2                              | 743.91       | 1485.80              | 1485.78                           | 0.02 60                               |          | 3       |  |
|              | DFPLTGYVELR                                                                                                             | +2                              | 655.35       | 1308.68              | 1308.67                           | 0.01 60                               |          | 5       |  |
|              | LSAFGEYVAEILPK                                                                                                          | +2                              | 768.93       | 1535.84              | 1535.82                           | 0.02 95                               |          | 2       |  |
|              |                                                                                                                         |                                 |              |                      |                                   |                                       |          |         |  |
| <b>No.</b>   | <b>Protein</b>                                                                                                          | <b>Matched (SEQUEST MASCOT)</b> | <b>emPAI</b> | <b>Strategy.Hits</b> | <b>PepMatched(SEQUEST MASCOT)</b> | <b>SpectraMatched(SEQUEST MASCOT)</b> |          |         |  |
| 804.         | IPI00202543                                                                                                             | Y Y                             | 0.08         | 2                    | 3 3 10                            | 9                                     |          |         |  |
| <b>*Des:</b> | Hexokinase, type I                                                                                                      |                                 |              |                      |                                   |                                       |          |         |  |
|              | SEQUEST:(PepMatched Observed.Hits Coverage)                                                                             |                                 |              |                      |                                   |                                       |          |         |  |
|              | Seq                                                                                                                     | Charge                          | Xcor         | Delta                | Probability                       | PepHits                               |          |         |  |
|              | ASGVEGADVVK                                                                                                             | +2                              | 3.154        | 0.402                | 0.9975                            | 4                                     |          |         |  |
|              | HIDLVEGDEGR                                                                                                             | +2                              | 4.032        | 0.596                | 1.0000                            | 5                                     |          |         |  |
|              | LSDEILIDILTR                                                                                                            | +2                              | 3.118        | 0.402                | 0.9966                            | 3                                     |          |         |  |
|              | MASCOT:(PepMatched Observed.Hits Coverage)                                                                              |                                 |              |                      |                                   |                                       |          |         |  |
|              | Seq                                                                                                                     | Charge                          | ObservedMS   | ExpectedMS           | CalculatedMS                      |                                       | PepScore | PepHits |  |
|              | LSDEILIDILTR                                                                                                            | +2                              | 700.9086     | 1399.8027            | 1399.7922                         | 0.01 81                               |          | 7       |  |

Identified Human Platelet Proteins

|                 |    |          |           |           |      |    |   |
|-----------------|----|----------|-----------|-----------|------|----|---|
| HIDLVEGDEGR     | +2 | 620.3051 | 1238.5956 | 1238.5891 | 0.01 | 42 | 2 |
| SANLVAATLGAILNR | +3 | 495.2935 | 1482.8585 | 1482.8518 | 0.01 | 66 | 3 |

No. 805. Protein IPI00210635 Matched (SEQUEST MASCOT) N Y emPAI Strategy.Hits 0.13 1 PepMatched(SEQUEST MASCOT) 0 4 SpectraMatched(SEQUEST MASCOT) 0 6

\*Des: N-ethylmaleimide sensitive factor

SEQUEST:(PepMatched Observed.Hits Coverage)

MASCOT:(PepMatched Observed.Hits Coverage) 4 1 7.39%

| Seq             | Charge | ObservedMS | ExpectedMS | CalculatedMS | PepScore | PepHits |
|-----------------|--------|------------|------------|--------------|----------|---------|
| GHQLLSADVDIK    | +2     | 648.35     | 1294.68    | 1294.69      | 0        | 53      |
| VLDDGELLVQQTK   | +2     | 729.40     | 1456.78    | 1456.78      | 0        | 57      |
| NFSGAELEGLVR    | +2     | 646.34     | 1290.66    | 1290.66      | 0        | 58      |
| MGIGGLDKFEFSDFR | +3     | 562.28     | 1683.83    | 1683.83      | 0        | 64      |

No. 806. Protein IPI00192076 Matched (SEQUEST MASCOT) Y N emPAI Strategy.Hits 0.09 2 PepMatched(SEQUEST MASCOT) 3 0 SpectraMatched(SEQUEST MASCOT) 5 0

\*Des: 100 kDa protein

SEQUEST:(PepMatched Observed.Hits Coverage) 3 2 4.66%

| Seq              | Charge | Xcor  | Delta | Probability | PepHits |
|------------------|--------|-------|-------|-------------|---------|
| TDPAALTDDEINR    | +2     | 3.394 | 0.509 | 0.9999      | 2       |
| AYTEEDLDLVEK     | +2     | 2.975 | 0.347 | 0.9981      | 1       |
| EIGLLTEEVELYGETK | +2     | 4.436 | 0.572 | 1.0000      | 2       |

MASCOT:(PepMatched Observed.Hits Coverage)

No. 807. Protein IPI00567177 Matched (SEQUEST MASCOT) N Y emPAI Strategy.Hits 2.75 3 PepMatched(SEQUEST MASCOT) 0 11 SpectraMatched(SEQUEST MASCOT) 0 482

\*Des: PREDICTED: similar to glyceraldehyde-3-phosphate dehydrogenase

SEQUEST:(PepMatched Observed.Hits Coverage)

MASCOT:(PepMatched Observed.Hits Coverage) 11 5 41.59%

| Seq                         | Charge | ObservedMS | ExpectedMS | CalculatedMS | PepScore | PepHits |
|-----------------------------|--------|------------|------------|--------------|----------|---------|
| LISWYDNEYGYSNR              | +2     | 890.4091   | 1778.8036  | 1778.7900    | 0.01     | 82      |
| VGVNGFGR                    | +2     | 403.2222   | 804.4298   | 804.4242     | 0.01     | 60      |
| GAAQNIIPASTGAAK             | +2     | 685.3809   | 1368.7472  | 1368.7361    | 0.01     | 99      |
| DGRGAAQNIIPASTGAAK          | +2     | 849.4615   | 1696.9085  | 1696.8856    | 0.02     | 48      |
| VIISAPSADAPMFVMGVNHEK       | +2     | 1107.0680  | 2212.1214  | 2212.1020    | 0.02     | 106     |
| LEKPAKYDDIKK                | +2     | 724.4164   | 1446.8182  | 1446.8082    | 0.01     | 64      |
| VIISAPSADAPMFVMGVNHEKYDNSLK | +3     | 978.4977   | 2932.4712  | 2932.4462    | 0.03     | 78      |
| VKVGNGFGR                   | +2     | 515.8327   | 1029.6509  | 1031.5875    | -1.93    | 55      |
| VPTPNVSVVDLTCR              | +2     | 750.4030   | 1498.7914  | 1498.7813    | 0.01     | 113     |
| VIHDFNGIVEGLMTTVHAITATQK    | +2     | 1298.1926  | 2594.3707  | 2594.3526    | 0.02     | 111     |
| LVINGKPITIFQER              | +2     | 814.4849   | 1626.9552  | 1626.9457    | 0.01     | 58      |

No. 808. Protein IPI00554213 Matched (SEQUEST MASCOT) Y Y emPAI Strategy.Hits 0.35 2 PepMatched(SEQUEST MASCOT) 2 3 SpectraMatched(SEQUEST MASCOT) 4 5

\*Des: PREDICTED: similar to methylenetetrahydrofolate dehydrogenase (NAD) (EC 1.5.1.15) / methenyltetrahydrofolate cyclohydrolase (EC 3.5.4.9) precursor - mouse

SEQUEST:(PepMatched Observed.Hits Coverage) 2 2 10.7%

Identified Human Platelet Proteins

| No.   | Protein                                          | Matched (SEQUEST MASCOT) | emPAI      | Strategy.Hits | PepMatched(SEQUEST MASCOT) | SpectraMatched(SEQUEST MASCOT) |
|-------|--------------------------------------------------|--------------------------|------------|---------------|----------------------------|--------------------------------|
| 809.  | IPI00211299                                      | N                        | Y          | 1.49          | 1                          | 0                              |
| *Des: | Neuropeptide Y precursor                         |                          |            |               |                            |                                |
|       | SEQUEST:(PepMatched Observed.Hits Coverage)      |                          |            |               |                            |                                |
|       | MASCOT:(PepMatched Observed.Hits Coverage)       |                          |            |               |                            |                                |
|       | Seq                                              | Charge                   | Xcor       | Delta         | Probility                  | PepHits                        |
|       | QEVVEEWVASGNK                                    | +2                       |            | 3.687         | 0.448                      | 0.9999 2                       |
|       | TLNDDENV DGLLVQLPLPEHIDER                        |                          |            |               | +3                         | 6.120 0.537 1.0000 2           |
|       | MASCOT:(PepMatched Observed.Hits Coverage)       |                          |            |               |                            |                                |
|       | Seq                                              | Charge                   | ObservedMS | ExpectedMS    | CalculatedMS               | Pepscore PepHits               |
|       | EGATVIDVGINR                                     | +2                       | 622.34     | 1242.66       | 1242.66                    | 0 64 2                         |
|       | QEVVEEWVASGNK                                    | +2                       | 688.33     | 1374.65       | 1374.64                    | 0.01 64 1                      |
|       | TLNDDENV DGLLVQLPLPEHIDER                        |                          |            | +3            | 915.47                     | 2743.38 2743.37 0.01 70 3      |
| No.   | Protein                                          | Matched (SEQUEST MASCOT) | emPAI      | Strategy.Hits | PepMatched(SEQUEST MASCOT) | SpectraMatched(SEQUEST MASCOT) |
| 810.  | IPI00551812                                      | Y                        | Y          | 1.42          | 5                          | 22                             |
| *Des: | ATP synthase beta chain, mitochondrial precursor |                          |            |               |                            |                                |
|       | SEQUEST:(PepMatched Observed.Hits Coverage)      |                          |            |               |                            |                                |
|       | MASCOT:(PepMatched Observed.Hits Coverage)       |                          |            |               |                            |                                |
|       | Seq                                              | Charge                   | Xcor       | Delta         | Probility                  | PepHits                        |
|       | IMDPNIVGSEHYDVAR                                 | +2                       |            | 4.767         | 0.632                      | 1.0000 5                       |
|       | VALVYGMNEPPGAR                                   | +2                       |            | 4.931         | 0.501                      | 1.0000 7                       |
|       | AHGGYSVFAGVGER                                   | +2                       |            | 3.938         | 0.541                      | 1.0000 4                       |
|       | IMNVIGEPIDER                                     | +2                       | 3.939      | 0.476         | 0.9999                     | 3                              |
|       | LVLEVAQHLGESTVR                                  | +2                       |            | 4.315         | 0.592                      | 1.0000 4                       |
|       | IGLFGGAGVGK                                      | +2                       | 3.236      | 0.463         | 0.9998                     | 6                              |
|       | IPSAVGYQPTLATDMGTMQER                            | +2                       |            | 5.297         | 0.658                      | 1.0000 2                       |
|       | VLDSGAPIKIPVGPETLGR                              | +2                       |            | 4.468         | 0.530                      | 1.0000 2                       |
|       | FTQAGSEVSALLGR                                   | +2                       | 3.913      | 0.459         | 0.9999                     | 3                              |
|       | VVDLLAPYAK                                       | +2                       | 2.765      | 0.357         | 0.9971                     | 2                              |
|       | TREGNDLYHEMIESGVINLK                             | +2                       |            | 5.736         | 0.401                      | 0.9993 3                       |
|       | AIAELGIYPAVDPLDSTSR                              | +2                       |            | 4.755         | 0.592                      | 1.0000 5                       |
|       | VALTGLTVAEYFR                                    | +2                       | 3.902      | 0.603         | 1.0000                     | 1                              |
|       | FLSQPFQVAEVFTGHMGK                               | +2                       |            | 4.544         | 0.608                      | 1.0000 5                       |
|       | QFAPIHAEAPEFIEMSVEQEILVTGIK                      | +3                       |            | 4.402         | 0.416                      | 0.9997 3                       |
|       | GFQQILAGDYDHLPEQAFYVMVGPIEEAVAK                  | +3                       |            | 4.736         | 0.543                      | 1.0000 3                       |
|       | TVLIMELINNVAK                                    | +2                       | 4.801      | 0.455         | 1.0000                     | 7                              |
|       | SLQDIIAILGMDDELSEEDKLTVSR                        | +3                       |            | 5.878         | 0.646                      | 1.0000 6                       |
|       | SLQDIIAILGMDDELSEEDK                             | +2                       |            | 4.647         | 0.454                      | 0.9999 2                       |
|       | IGLFGGAGVGKTVLIMELINNVAK                         | +3                       |            | 3.949         | 0.411                      | 0.9934 2                       |
|       | DQEGQDVLLFIDNIFR                                 | +2                       |            | 6.025         | 0.590                      | 1.0000 7                       |
|       | VALTGLTVAEYFRDQEGQDVLLFIDNIFR                    | +3                       |            | 5.606         | 0.553                      | 1.0000 3                       |
|       | MASCOT:(PepMatched Observed.Hits Coverage)       |                          |            |               |                            |                                |
|       | Seq                                              | Charge                   | ObservedMS | ExpectedMS    | CalculatedMS               | Pepscore PepHits               |
|       |                                                  |                          |            |               |                            | 52.04%                         |



Identified Human Platelet Proteins

|                          |    |        |         |         |      |     |   |  |
|--------------------------|----|--------|---------|---------|------|-----|---|--|
| IPVGPETLGR               | +2 | 519.80 | 1037.59 | 1037.59 | 0    | 63  | 6 |  |
| IMDPNIVGSEHYDVAR         | +2 | 908.44 | 1814.87 | 1814.86 | 0.01 | 88  | 4 |  |
| IGLFGGAGVGK              | +2 | 489.27 | 976.53  | 974.55  | 1.98 | 50  | 6 |  |
| TIAMDGTEGLVR             | +2 | 631.83 | 1261.64 | 1261.63 | 0.01 | 65  | 2 |  |
| IMNVIGEPIDER             | +2 | 693.37 | 1384.72 | 1384.70 | 0.02 | 52  | 1 |  |
| AHGGYSVFAGVGER           | +2 | 703.85 | 1405.68 | 1405.67 | 0.01 | 87  | 4 |  |
| VALVYQMNPPGAR            | +2 | 801.41 | 1600.81 | 1600.80 | 0.01 | 93  | 5 |  |
| LVLEVAQHLGESTVR          | +2 | 825.97 | 1649.92 | 1649.91 | 0.01 | 86  | 5 |  |
| IPSAVGYQPTLATDMGTMQER    | +3 | 756.04 | 2265.09 | 2265.08 | 0.01 | 62  | 1 |  |
| VVDLLAPYAK               | +2 | 544.82 | 1087.63 | 1087.63 | 0    | 45  | 2 |  |
| FTQAGSEVSALLGR           | +2 | 718.38 | 1434.75 | 1434.75 | 0    | 92  | 3 |  |
| VALTGLTVAEYFR            | +2 | 720.40 | 1438.79 | 1438.78 | 0.01 | 78  | 2 |  |
| VLDSGAPIKIPVGPETLGR      | +2 | 960.06 | 1918.10 | 1918.09 | 0.01 | 80  | 2 |  |
| AIAELGIYPAVDPLDSTSR      | +2 | 994.52 | 1987.03 | 1987.03 | 0    | 72  | 5 |  |
| TREGNDLYHEMIESGVINLK     | +3 | 773.39 | 2317.14 | 2317.14 | 0    | 58  | 1 |  |
| TVLIMELINNVAK            | +2 | 729.43 | 1456.84 | 1456.83 | 0.01 | 86  | 6 |  |
| DQEGQDVLLFIDNIFR         | +2 | 961.49 | 1920.97 | 1920.96 | 0.01 | 101 | 7 |  |
| IGLFGGAGVGKTVLIMELINNVAK | +3 | 805.47 | 2413.39 | 2413.38 | 0.01 | 53  | 2 |  |
| SLQDIAILGMDLSEEDKLTVSR   | +3 | 892.47 | 2674.39 | 2674.37 | 0.02 | 89  | 4 |  |

|          |                                             |                          |            |               |                            |                                |          |         |
|----------|---------------------------------------------|--------------------------|------------|---------------|----------------------------|--------------------------------|----------|---------|
| No. 811. | Protein                                     | Matched (SEQUEST MASCOT) | emPAI      | Strategy.Hits | PepMatched(SEQUEST MASCOT) | SpectraMatched(SEQUEST MASCOT) |          |         |
| *Des:    | IPI00209300                                 | Y Y                      | 0.09       | 3             | 2 4 4                      | 17                             |          |         |
|          | Density-enhanced phosphatase-1 precursor    |                          |            |               |                            |                                |          |         |
|          | SEQUEST:(PepMatched Observed.Hits Coverage) |                          |            | 2             | 2                          | 1.85%                          |          |         |
|          | Seq                                         | Charge                   | Xcor       | Delta         | Proability                 | PepHits                        |          |         |
|          | NTEVGNEVPGQK                                | +2                       | 3.365      | 0.446         | 0.9989                     | 2                              |          |         |
|          | YAAEIAENR                                   | +2                       | 3.604      | 0.460         | 0.9997                     | 2                              |          |         |
|          | MASCOT:(PepMatched Observed.Hits Coverage)  |                          |            | 4             | 3                          | 4.44%                          |          |         |
|          | Seq                                         | Charge                   | ObservedMS | ExpectedMS    | CalculatedMS               |                                | Pepscore | PepHits |
|          | VTIYSQAADGTEGQPGNK                          | +2                       | 918.45     | 1834.88       | 1834.87                    | 0.01                           | 102      | 2       |
|          | FSGFEASHGPIK                                | +2                       | 638.82     | 1275.63       | 1275.62                    | 0.01                           | 49       | 6       |
|          | NNEVSFSQIKPK                                | +2                       | 695.87     | 1389.73       | 1389.73                    | 0                              | 52       | 5       |
|          | TGTFIAIDR                                   | +2                       | 497.28     | 992.54        | 992.53                     | 0.01                           | 63       | 18      |

|          |                                             |                          |            |               |                            |                                |          |         |
|----------|---------------------------------------------|--------------------------|------------|---------------|----------------------------|--------------------------------|----------|---------|
| No. 812. | Protein                                     | Matched (SEQUEST MASCOT) | emPAI      | Strategy.Hits | PepMatched(SEQUEST MASCOT) | SpectraMatched(SEQUEST MASCOT) |          |         |
| *Des:    | IPI00373722                                 | Y Y                      | 0.09       | 1             | 2 2 2                      | 2                              |          |         |
|          | PREDICTED: similar to RAN binding protein 5 |                          |            |               |                            |                                |          |         |
|          | SEQUEST:(PepMatched Observed.Hits Coverage) |                          |            | 2             | 1                          | 3.39%                          |          |         |
|          | Seq                                         | Charge                   | Xcor       | Delta         | Proability                 | PepHits                        |          |         |
|          | LVLEQVVTSIASVADTAEK                         | +3                       | 4.168      | 0.566         | 1.0000                     | 2                              |          |         |
|          | QLALEVIVTLSETAAAMLR                         | +3                       | 3.814      | 0.532         | 1.0000                     | 1                              |          |         |
|          | MASCOT:(PepMatched Observed.Hits Coverage)  |                          |            | 2             | 1                          | 3.39%                          |          |         |
|          | Seq                                         | Charge                   | ObservedMS | ExpectedMS    | CalculatedMS               |                                | Pepscore | PepHits |
|          | LVLEQVVTSIASVADTAEK                         | +3                       | 701.39     | 2101.14       | 2101.12                    | 0.02                           | 47       | 2       |
|          | QLALEVIVTLSETAAAMLR                         | +3                       | 677.05     | 2028.14       | 2028.13                    | 0.01                           | 58       | 1       |

|     |         |                          |       |               |                            |                                |  |  |
|-----|---------|--------------------------|-------|---------------|----------------------------|--------------------------------|--|--|
| No. | Protein | Matched (SEQUEST MASCOT) | emPAI | Strategy.Hits | PepMatched(SEQUEST MASCOT) | SpectraMatched(SEQUEST MASCOT) |  |  |
|-----|---------|--------------------------|-------|---------------|----------------------------|--------------------------------|--|--|

Identified Human Platelet Proteins

813. IPI00367234 Y Y 0.05 1 2 2 2 2

\*Des: PREDICTED: similar to Expressed sequence AI314180

| SEQUEST:(PepMatched Observed.Hits Coverage) |        | 2          | 1          | 1.6%         |          |         |    |   |  |
|---------------------------------------------|--------|------------|------------|--------------|----------|---------|----|---|--|
| Seq                                         | Charge | Xcor       | Delta      | Proability   | PepHits  |         |    |   |  |
| TEALSVIELLLK                                | +2     |            | 3.777      | 0.224        | 0.9932   | 1       |    |   |  |
| ELQLESLLGAFESLGK                            | +2     |            | 4.313      | 0.600        | 1.0000   | 1       |    |   |  |
| MASCOT:(PepMatched Observed.Hits Coverage)  |        | 2          | 1          | 1.6%         |          |         |    |   |  |
| Seq                                         | Charge | ObservedMS | ExpectedMS | CalculatedMS | Pepscore | PepHits |    |   |  |
| TEALSVIELLLK                                | +2     | 664.91     | 1327.80    | 1327.80      | 0        | 67      | 1  |   |  |
| ELQLESLLGAFESLGK                            | +2     |            | 867.48     | 1732.95      | 1732.92  | 0.03    | 71 | 1 |  |

No. Protein Matched (SEQUEST MASCOT) emPAI Strategy.Hits PepMatched(SEQUEST MASCOT) SpectraMatched(SEQUEST MASCOT)  
 814. IPI00189212 Y Y 0.32 2 4 4 5 5

\*Des: PREDICTED: similar to hypothetical protein

| SEQUEST:(PepMatched Observed.Hits Coverage) |        | 4          | 2          | 12.92%       |          |         |         |      |    |
|---------------------------------------------|--------|------------|------------|--------------|----------|---------|---------|------|----|
| Seq                                         | Charge | Xcor       | Delta      | Proability   | PepHits  |         |         |      |    |
| DIYDQGGQAIK                                 | +2     |            | 3.381      | 0.419        | 0.9996   | 1       |         |      |    |
| LISQAYEVLSDPK                               | +2     |            | 3.314      | 0.423        | 0.9994   | 2       |         |      |    |
| ILFHGEGDQEPLEPGDVIIILDQK                    |        |            |            | +3           | 3.715    | 0.410   | 0.9993  | 1    |    |
| NVVHQLSVTLEDLYNGITK                         |        |            |            | +3           | 3.611    | 0.342   | 0.9983  | 1    |    |
| MASCOT:(PepMatched Observed.Hits Coverage)  |        | 4          | 2          | 12.92%       |          |         |         |      |    |
| Seq                                         | Charge | ObservedMS | ExpectedMS | CalculatedMS | Pepscore | PepHits |         |      |    |
| DIYDQGGQAIK                                 | +2     | 668.83     | 1335.64    | 1335.63      | 0.01     | 46      | 1       |      |    |
| LISQAYEVLSDPK                               | +2     | 731.90     | 1461.78    | 1461.77      | 0.01     | 59      | 2       |      |    |
| ILFHGEGDQEPLEPGDVIIILDQK                    |        |            |            | +3           | 930.82   | 2789.43 | 2789.41 | 0.02 | 41 |
| NVVHQLSVTLEDLYNGITK                         |        |            |            | +3           | 715.05   | 2142.14 | 2142.13 | 0.01 | 47 |

No. Protein Matched (SEQUEST MASCOT) emPAI Strategy.Hits PepMatched(SEQUEST MASCOT) SpectraMatched(SEQUEST MASCOT)  
 815. IPI00209232 Y Y 0.61 3 6 5 9 9

\*Des: GMP reductase 1

| SEQUEST:(PepMatched Observed.Hits Coverage) |        | 6          | 4          | 27.06%       |          |           |           |      |    |
|---------------------------------------------|--------|------------|------------|--------------|----------|-----------|-----------|------|----|
| Seq                                         | Charge | Xcor       | Delta      | Proability   | PepHits  |           |           |      |    |
| STCTYVGAAG                                  | +2     |            | 3.043      | 0.535        | 1.0000   | 3         |           |      |    |
| MSLILEAVPQVK                                | +2     |            | 3.967      | 0.489        | 1.0000   | 3         |           |      |    |
| TVEVPYKGDVENTILDILGGLR                      |        |            |            | +3           | 4.542    | 0.432     | 1.0000    | 4    |    |
| HAGGVAEYR                                   | +2     |            | 2.333      | 0.485        | 0.9985   | 5         |           |      |    |
| VGVGPGSVCTTR                                | +2     |            | 3.315      | 0.481        | 0.9996   | 8         |           |      |    |
| TKTGVGYPQLSAVIECADSAHGLK                    |        |            |            | +3           | 5.622    | 0.531     | 1.0000    | 1    |    |
| MASCOT:(PepMatched Observed.Hits Coverage)  |        | 5          | 4          | 20.51%       |          |           |           |      |    |
| Seq                                         | Charge | ObservedMS | ExpectedMS | CalculatedMS | Pepscore | PepHits   |           |      |    |
| STCTYVGAAG                                  | +2     | 501.7241   | 1001.4337  | 999.4695     | 1.96     | 43        | 6         |      |    |
| HAGGVAEYR                                   | +2     | 480.2398   | 958.4651   | 958.4620     | 0        | 47        | 5         |      |    |
| MSLILEAVPQVK                                | +2     | 664.3912   | 1326.7678  | 1326.7581    | 0.01     | 72        | 2         |      |    |
| VGVGPGSVCTTR                                | +2     | 566.7957   | 1131.5769  | 1131.5706    | 0.01     | 84        | 5         |      |    |
| TKTGVGYPQLSAVIECADSAHGLK                    |        |            |            | +3           | 815.7589 | 2444.2547 | 2444.2369 | 0.02 | 83 |

No. Protein Matched (SEQUEST MASCOT) emPAI Strategy.Hits PepMatched(SEQUEST MASCOT) SpectraMatched(SEQUEST MASCOT)

| Identified Human Platelet Proteins |                                             |                          |            |               |                            |                                |        |          |    |         |
|------------------------------------|---------------------------------------------|--------------------------|------------|---------------|----------------------------|--------------------------------|--------|----------|----|---------|
| 816.                               | IPI00324986                                 | Y                        | Y          | 0.2           | 1                          | 3                              | 3      | 11       | 20 |         |
| *Des:                              | Rab GDP dissociation inhibitor alpha        |                          |            |               |                            |                                |        |          |    |         |
|                                    | SEQUEST:(PepMatched Observed.Hits Coverage) |                          |            |               | 3                          | 1                              | 10.54% |          |    |         |
|                                    | Seq                                         | Charge                   | Xcor       | Delta         | Probility                  | PepHits                        |        |          |    |         |
|                                    | TFEGVDPQTTSMR                               | +2                       |            | 3.100         | 0.213                      | 0.9741                         | 1      |          |    |         |
|                                    | FQLEGGPPESMGR                               | +2                       |            | 2.865         | 0.332                      | 0.9926                         | 1      |          |    |         |
|                                    | SPYLYPLYGLGELPQGFAR                         | +2                       |            | 6.059         | 0.666                      | 1.0000                         | 9      |          |    |         |
|                                    | MASCOT:(PepMatched Observed.Hits Coverage)  |                          |            |               | 3                          | 1                              | 10.54% |          |    |         |
|                                    | Seq                                         | Charge                   | ObservedMS | ExpectedMS    | CalculatedMS               |                                |        | Pepscore |    | PepHits |
|                                    | TFEGVDPQTTSMR                               | +2                       | 734.8456   | 1467.6767     | 1467.6664                  | 0.01                           | 52     | 2        |    |         |
|                                    | FQLEGGPPESMGR                               | +2                       | 730.8682   | 1459.7218     | 1459.7129                  | 0.01                           | 46     | 1        |    |         |
|                                    | SPYLYPLYGLGELPQGFAR                         | +2                       | 1071.0686  | 2140.1227     | 2140.0992                  | 0.02                           | 106    | 23       |    |         |
| No.                                | Protein                                     | Matched (SEQUEST MASCOT) | emPAI      | Strategy.Hits | PepMatched(SEQUEST MASCOT) | SpectraMatched(SEQUEST MASCOT) |        |          |    |         |
| 817.                               | IPI00364904                                 | Y                        | Y          | 0.06          | 2                          | 2                              | 2      | 2        | 13 |         |
| *Des:                              | PREDICTED: kinesin family member 5B         |                          |            |               |                            |                                |        |          |    |         |
|                                    | SEQUEST:(PepMatched Observed.Hits Coverage) |                          |            |               | 2                          | 1                              | 3.16%  |          |    |         |
|                                    | Seq                                         | Charge                   | Xcor       | Delta         | Probility                  | PepHits                        |        |          |    |         |
|                                    | DQDNMQAELNR                                 | +2                       |            | 3.344         | 0.318                      | 0.9993                         | 1      |          |    |         |
|                                    | QLDDKDEEINQSQLVEK                           | +3                       |            | 3.980         | 0.272                      | 0.9988                         | 1      |          |    |         |
|                                    | MASCOT:(PepMatched Observed.Hits Coverage)  |                          |            |               | 2                          | 1                              | 3.46%  |          |    |         |
|                                    | Seq                                         | Charge                   | ObservedMS | ExpectedMS    | CalculatedMS               |                                |        | Pepscore |    | PepHits |
|                                    | KSAEVDSDDTGGSAQKQK                          | +3                       | 641.3102   | 1920.9089     | 1920.9024                  | 0.01                           | 81     | 2        |    |         |
|                                    | HVAVTNMNEHSSR                               | +2                       | 741.3511   | 1480.6876     | 1480.6841                  | 0                              | 69     | 14       |    |         |
| No.                                | Protein                                     | Matched (SEQUEST MASCOT) | emPAI      | Strategy.Hits | PepMatched(SEQUEST MASCOT) | SpectraMatched(SEQUEST MASCOT) |        |          |    |         |
| 818.                               | IPI00372924                                 | N                        | Y          | 0.1           | 1                          | 0                              | 2      | 0        | 5  |         |
| *Des:                              | Cytokeratin 19                              |                          |            |               |                            |                                |        |          |    |         |
|                                    | SEQUEST:(PepMatched Observed.Hits Coverage) |                          |            |               | 2                          | 1                              | 5.6%   |          |    |         |
|                                    | MASCOT:(PepMatched Observed.Hits Coverage)  |                          |            |               | 2                          | 1                              | 5.6%   |          |    |         |
|                                    | Seq                                         | Charge                   | ObservedMS | ExpectedMS    | CalculatedMS               |                                |        | Pepscore |    | PepHits |
|                                    | ALEQANGELEVK                                | +2                       | 651.3420   | 1300.6695     | 1299.6670                  | 1                              | 34     | 2        |    |         |
|                                    | LASYLDKVR                                   | +2                       | 532.8174   | 1063.6203     | 1063.6026                  | 0.02                           | 59     | 4        |    |         |
| No.                                | Protein                                     | Matched (SEQUEST MASCOT) | emPAI      | Strategy.Hits | PepMatched(SEQUEST MASCOT) | SpectraMatched(SEQUEST MASCOT) |        |          |    |         |
| 819.                               | IPI00231690                                 | Y                        | Y          | 0.82          | 3                          | 3                              | 3      | 6        | 3  |         |
| *Des:                              | Cysteine and glycine-rich protein 1         |                          |            |               |                            |                                |        |          |    |         |
|                                    | SEQUEST:(PepMatched Observed.Hits Coverage) |                          |            |               | 3                          | 4                              | 17.34% |          |    |         |
|                                    | Seq                                         | Charge                   | Xcor       | Delta         | Probility                  | PepHits                        |        |          |    |         |
|                                    | NLDSTTVAVHGEEIYCK                           | +2                       |            | 4.998         | 0.619                      | 1.0000                         | 2      |          |    |         |
|                                    | GFGFGQGAGALVHS                              | +2                       |            | 2.951         | 0.456                      | 0.9945                         | 3      |          |    |         |
|                                    | GFGFGQGAGALVHSE                             | +2                       |            | 3.966         | 0.477                      | 1.0000                         | 6      |          |    |         |
|                                    | MASCOT:(PepMatched Observed.Hits Coverage)  |                          |            |               | 3                          | 1                              | 28.06% |          |    |         |
|                                    | Seq                                         | Charge                   | ObservedMS | ExpectedMS    | CalculatedMS               |                                |        | Pepscore |    | PepHits |
|                                    | GYGYGQGAGTLSMDK                             | +2                       | 752.84     | 1503.67       | 1503.67                    | 0                              | 68     | 1        |    |         |
|                                    | GLESTTLADKDG E IYCKGCYAK                    | +3                       | 788.70     | 2363.08       | 2364.10                    | -1.01                          | 43     | 1        |    |         |
|                                    | GFGFGQGAGALVHSE                             | +2                       | 717.35     | 1432.68       | 1432.67                    | 0.01                           | 71     | 1        |    |         |

Identified Human Platelet Proteins

| No.   | Protein                                                                  | Matched (SEQUEST MASCOT) | emPAI  | Strategy.Hits | PepMatched(SEQUEST MASCOT) | SpectraMatched(SEQUEST MASCOT) |
|-------|--------------------------------------------------------------------------|--------------------------|--------|---------------|----------------------------|--------------------------------|
| 820.  | IPI00198978                                                              | Y Y                      | 0.26   | 1             | 2 3 3                      | 4                              |
| *Des: | Proteasome 26S non-ATPase subunit 12                                     |                          |        |               |                            |                                |
|       | SEQUEST:(PepMatched Observed.Hits Coverage)                              |                          |        | 2             | 1                          | 8.4%                           |
|       | Seq Charge Xcor Delta                                                    |                          |        | Probility     | PepHits                    |                                |
|       | EWDLLNENIMLLSK +2                                                        |                          | 3.239  | 0.355         | 0.9977                     | 1                              |
|       | MAQLLDLSVDESEAFLSNLVVNK                                                  |                          |        | +3            | 5.888                      | 0.442 0.9999 2                 |
|       | MASCOT:(PepMatched Observed.Hits Coverage)                               |                          |        | 3             | 1                          | 10.77%                         |
|       | Seq Charge ObservedMS                                                    |                          |        | ExpectedMS    | CalculatedMS               | Pepscore PepHits               |
|       | LNSLMSLVNK +2                                                            |                          | 559.82 | 1117.62       | 1117.62                    | 0 54 1                         |
|       | EWDLLNENIMLLSK +2                                                        |                          | 859.45 | 1716.88       | 1716.88                    | 0 43 1                         |
|       | MAQLLDLSVDESEAFLSNLVVNK                                                  |                          |        | +3            | 845.77                     | 2534.30 2534.29 0.01 80 2      |
| 821.  | IPI00231765                                                              | N Y                      | 0.13   | 1             | 0 3 0                      | 8                              |
| *Des: | Splice Isoform 1 of Reticulon 4                                          |                          |        |               |                            |                                |
|       | SEQUEST:(PepMatched Observed.Hits Coverage)                              |                          |        |               |                            |                                |
|       | MASCOT:(PepMatched Observed.Hits Coverage)                               |                          |        | 3             | 1                          | 4.14%                          |
|       | Seq Charge ObservedMS                                                    |                          |        | ExpectedMS    | CalculatedMS               | Pepscore PepHits               |
|       | GPLPAAPPAAPER +2                                                         |                          | 622.35 | 1242.68       | 1242.67                    | 0.01 47 4                      |
|       | YSNSALGHVNSTIK +2                                                        |                          | 745.89 | 1489.77       | 1489.75                    | 0.02 58 1                      |
|       | SPAAPAPSLPPAAAVLPSK +2                                                   |                          |        | 871.50        | 1740.99                    | 1740.98 0.01 73 6              |
| 822.  | IPI00189148                                                              | Y Y                      | 0.61   | 4             | 6 4 27                     | 15                             |
| *Des: | Serine (Or cysteine) proteinase inhibitor, clade B (Ovalbumin), member 6 |                          |        |               |                            |                                |
|       | SEQUEST:(PepMatched Observed.Hits Coverage)                              |                          |        | 6             | 9                          | 26.68%                         |
|       | Seq Charge Xcor Delta                                                    |                          |        | Probility     | PepHits                    |                                |
|       | KFYEAEMEELDFKGDTEQSR +3                                                  |                          |        | 5.405         | 0.515                      | 1.0000 2                       |
|       | TEEKPVQMMFMK +2                                                          |                          | 3.280  | 0.244         | 0.9924                     | 2                              |
|       | MTYIGEIFTK +2                                                            |                          | 2.940  | 0.380         | 0.9989                     | 1                              |
|       | LDMLDEEEVEVFLPR +2                                                       |                          |        | 2.951         | 0.256                      | 0.9798 2                       |
|       | FLADHPFLFFIQHVK +3                                                       |                          | 3.946  | 0.319         | 0.9997                     | 4                              |
|       | ILLLPYAGNELNMIIMLPDEHIELK                                                |                          |        | +3            | 4.368                      | 0.467 1.0000 4                 |
|       | MASCOT:(PepMatched Observed.Hits Coverage)                               |                          |        | 4             | 7                          | 14.24%                         |
|       | Seq Charge ObservedMS                                                    |                          |        | ExpectedMS    | CalculatedMS               | Pepscore PepHits               |
|       | LGMTDAFMGR +2                                                            |                          | 614.28 | 1226.55       | 1226.54                    | 0.01 65 2                      |
|       | GMTASQMVQTLSLDK +2                                                       |                          |        | 805.41        | 1608.80                    | 1608.79 0.01 78 1              |
|       | MTYIGEIFTK +2                                                            |                          | 601.81 | 1201.61       | 1201.61                    | 0 49 5                         |
|       | FLADHPFLFFIQHVK +3                                                       |                          | 620.34 | 1858.01       | 1857.99                    | 0.02 48 2                      |
| 823.  | IPI00205023                                                              | Y N                      | 0.07   | 1             | 2 0 2                      | 0                              |
| *Des: | cGMP-inhibited 3',5'-cyclic phosphodiesterase B                          |                          |        |               |                            |                                |
|       | SEQUEST:(PepMatched Observed.Hits Coverage)                              |                          |        | 2             | 1                          | 1.33%                          |
|       | Seq Charge Xcor Delta                                                    |                          |        | Probility     | PepHits                    |                                |

Identified Human Platelet Proteins

FLVIEAILATDLKK +2 3.816 0.382 0.9992 2  
 FLVIEAILATDLK +2 3.961 0.503 0.9999 1

MASCOT:(PepMatched Observed.Hits Coverage)

No. Protein Matched (SEQUEST MASCOT) emPAI Strategy.Hits PepMatched(SEQUEST MASCOT) SpectraMatched(SEQUEST MASCOT)  
 824. IPI00231694 Y N 0.11 1 2 0 2 0

\*Des: Xanthine dehydrogenase/oxidase

SEQUEST:(PepMatched Observed.Hits Coverage) 2 1 2.36%

Seq Charge Xcor Delta Probility PepHits  
 IPAFGSIPIEFR +2 3.545 0.475 0.9998 1  
 TLLRPEEILLSIEIPYSK +3 3.485 0.383 0.9997 2

MASCOT:(PepMatched Observed.Hits Coverage)

No. Protein Matched (SEQUEST MASCOT) emPAI Strategy.Hits PepMatched(SEQUEST MASCOT) SpectraMatched(SEQUEST MASCOT)  
 825. IPI00231767 Y Y 0.65 2 4 4 13 34

\*Des: Triosephosphate isomerase

SEQUEST:(PepMatched Observed.Hits Coverage) 4 3 24.9%

Seq Charge Xcor Delta Probility PepHits  
 RHIFGESDELIGQK +3 4.390 0.368 0.9999 3  
 VTNGAFTGEISPGMIK +2 4.516 0.500 1.0000 5  
 DLGATWVVLGHSER +2 4.350 0.596 1.0000 4  
 VVLAYEPVWAIGTGK +2 4.428 0.551 1.0000 5

MASCOT:(PepMatched Observed.Hits Coverage) 4 2 24.9%

Seq Charge ObservedMS ExpectedMS CalculatedMS Pepscore PepHits  
 RHIFGESDELIGQK +3 543.62 1627.84 1627.83 0.01 57 6  
 DLGATWVVLGHSER +2 770.40 1538.79 1538.78 0.01 86 4  
 VTNGAFTGEISPGMIK +2 811.91 1621.81 1620.82 0.99 82 5  
 VVLAYEPVWAIGTGK +2 801.95 1601.89 1601.88 0.01 85 28

No. Protein Matched (SEQUEST MASCOT) emPAI Strategy.Hits PepMatched(SEQUEST MASCOT) SpectraMatched(SEQUEST MASCOT)  
 826. IPI00373587 Y Y 1.57 1 5 4 20 16

\*Des: PREDICTED: similar to Protein phosphatase 2A, regulatory subunit B (PR 53)

SEQUEST:(PepMatched Observed.Hits Coverage) 5 1 22.44%

Seq Charge Xcor Delta Probility PepHits  
 WIDETPPVDQPSR +2 4.011 0.536 1.0000 5  
 VDDQVAIVFK +2 2.974 0.215 0.9842 5  
 LVALLDTLDR +2 3.607 0.465 0.9998 20  
 TGPFAEHSNQLWNISAVPSWSK +3 4.242 0.414 0.9998 3  
 SQAYADYIGFILTLNEGVK +2 6.032 0.525 1.0000 2

MASCOT:(PepMatched Observed.Hits Coverage) 4 1 19.31%

Seq Charge ObservedMS ExpectedMS CalculatedMS Pepscore PepHits  
 WIDETPPVDQPSR +2 770.38 1538.75 1538.74 0.01 71 5  
 LVALLDTLDR +2 564.84 1127.66 1127.65 0.01 70 22  
 TGPFAEHSNQLWNISAVPSWSK +3 819.41 2455.22 2455.19 0.03 59 3  
 SQAYADYIGFILTLNEGVK +3 701.37 2101.09 2101.07 0.02 48 1

No. Protein Matched (SEQUEST MASCOT) emPAI Strategy.Hits PepMatched(SEQUEST MASCOT) SpectraMatched(SEQUEST MASCOT)

Identified Human Platelet Proteins

827. IPI00211512 N Y 0.32 2 0 6 0 26

\*Des:

Actin-related protein 2/3 complex subunit 1B

SEQUEST:(PepMatched Observed.Hits Coverage)

MASCOT:(PepMatched Observed.Hits Coverage)

| Seq                | Charge | ObservedMS | ExpectedMS | CalculatedMS | PepScore | PepHits |
|--------------------|--------|------------|------------|--------------|----------|---------|
| EVEERPAPTPWGSK+2   |        | 791.90     | 1581.79    | 1581.78      | 0.01     | 57      |
| ASSEGGAATGAGLDSLHK | +2     | 638.35     | 1274.69    | 1274.68      | 0.01     | 88      |
| NSVSQISVLSGGK      | +2     | 420.72     | 839.42     | 840.47       | -1.04    | 53      |
| IFSAYIK            | +2     |            | 955.45     | 1908.89      | 1908.87  | 0.02    |
| EHNGQVTGIDWAPESNR  | +2     |            | 409.93     | 1226.76      | 1225.75  | 1.01    |
| TWKPTLVILR         | +3     |            |            |              |          | 62      |

No. Protein Matched (SEQUEST MASCOT) emPAI Strategy.Hits PepMatched(SEQUEST MASCOT) SpectraMatched(SEQUEST MASCOT)

828. IPI00212314 Y N 0.42 3 9 0 16 0

\*Des:

Moesin

SEQUEST:(PepMatched Observed.Hits Coverage)

| Seq                 | Charge | Xcor  | Delta | Probability | PepHits |
|---------------------|--------|-------|-------|-------------|---------|
| FYPEDVSEELIQDITQR   |        |       | +3    | 4.442       | 0.483   |
| AKFYPEDVSEELIQDITQR |        |       | +3    | 3.712       | 0.368   |
| ERQEAEAKEALLQASR    |        |       | +3    | 3.552       | 0.363   |
| IGFPWSEIR           | +2     | 3.023 |       | 0.322       | 0.9971  |
| KTTNDMIHAENMR       | +2     | 4.643 |       | 0.623       | 1.0000  |
| KPDTIEVQQMK         | +2     | 3.367 |       | 0.362       | 0.9986  |
| SGYLAGDKLLPQR       | +2     | 3.358 |       | 0.462       | 0.9977  |
| RKPDTIEVQQMK        | +3     | 3.295 |       | 0.362       | 0.9999  |
| VLEQHKLNK           | +2     | 2.842 |       | 0.301       | 0.9743  |

MASCOT:(PepMatched Observed.Hits Coverage)

No. Protein Matched (SEQUEST MASCOT) emPAI Strategy.Hits PepMatched(SEQUEST MASCOT) SpectraMatched(SEQUEST MASCOT)

829. IPI00362229 Y N 0.19 1 2 0 3 0

\*Des:

42 kDa protein

SEQUEST:(PepMatched Observed.Hits Coverage)

| Seq                | Charge | Xcor  | Delta | Probability | PepHits |
|--------------------|--------|-------|-------|-------------|---------|
| TLFSNIVLSGGSTLTK   | +2     | 5.104 |       | 0.605       | 1.0000  |
| LYSTWIGGSILASLDTFK | +2     | 3.230 |       | 0.247       | 0.9842  |

MASCOT:(PepMatched Observed.Hits Coverage)

No. Protein Matched (SEQUEST MASCOT) emPAI Strategy.Hits PepMatched(SEQUEST MASCOT) SpectraMatched(SEQUEST MASCOT)

830. IPI00230897 Y Y 1 5 4 7 13 28

\*Des:

Hemoglobin beta chain, major-form

SEQUEST:(PepMatched Observed.Hits Coverage)

| Seq                     | Charge | Xcor  | Delta | Probability | PepHits |
|-------------------------|--------|-------|-------|-------------|---------|
| VNPDDVGGGEALGR          | +2     | 4.499 |       | 0.505       | 1.0000  |
| YFDSFGDLSSASAIMGNPK     | +2     | 6.193 |       | 0.575       | 1.0000  |
| GTF AHLSELHCDKLHVDPENFR | +3     | 3.249 |       | 0.477       | 1.0000  |
| VHLTDAEKAAVNGLWGK       | +3     |       |       |             |         |

MASCOT:(PepMatched Observed.Hits Coverage)

| Identified Human Platelet Proteins |        |            |            |              |      |    |    |          |         |
|------------------------------------|--------|------------|------------|--------------|------|----|----|----------|---------|
| Seq                                | Charge | ObservedMS | ExpectedMS | CalculatedMS |      |    |    | PepScore | PepHits |
| LHVDPENFR                          | +2     | 563.8232   | 1125.6318  | 1125.5567    | 0.08 | 51 | 1  |          |         |
| KVINAFNDGLK                        | +2     | 609.8846   | 1217.7546  | 1217.6768    | 0.08 | 41 | 1  |          |         |
| VNPDDVGGEALGR                      | +2     | 649.8675   | 1297.7204  | 1297.6262    | 0.09 | 48 | 4  |          |         |
| YFDSFGDLSSASAIMGNPK                | +2     | 1004.0267  | 2006.0388  | 2005.9091    | 0.13 | 90 | 1  |          |         |
| VINAFNDGLK                         | +2     | 545.8290   | 1089.6434  | 1089.5818    | 0.06 | 44 | 5  |          |         |
| LLVVYPWTQR                         | +2     | 637.8884   | 1273.7622  | 1273.7183    | 0.04 | 47 | 31 |          |         |
| VVAGVASALAHK                       | +2     | 561.8705   | 1121.7264  | 1121.6556    | 0.07 | 60 | 10 |          |         |

No. 831. Protein IPI00191354 Matched (SEQUEST MASCOT) Y N emPAI 0.45 Strategy.Hits 3 PepMatched(SEQUEST MASCOT) 6 SpectraMatched(SEQUEST MASCOT) 0

\*Des: 33 kDa protein

SEQUEST:(PepMatched Observed.Hits Coverage) 6 6 22.83%

| Seq              | Charge | Xcor  | Delta | Probability | PepHits |  |  |
|------------------|--------|-------|-------|-------------|---------|--|--|
| MLDQTLLDLNE      | +2     | 4.021 | 0.517 | 1.0000      | 5       |  |  |
| TIDDLEDKLK       | +2     | 3.255 | 0.308 | 0.9870      | 7       |  |  |
| MLDQTLLDLNEM     | +2     | 3.442 | 0.366 | 0.9986      | 4       |  |  |
| KLVIIEGDLER      | +3     | 2.829 | 0.343 | 0.9996      | 3       |  |  |
| ALKDEEKMELQEIQLK | +2     | 5.286 | 0.499 | 1.0000      | 4       |  |  |
| ILTDKLKEAETR     | +2     | 3.740 | 0.446 | 0.9987      | 3       |  |  |

MASCOT:(PepMatched Observed.Hits Coverage)

No. 832. Protein IPI00212249 Matched (SEQUEST MASCOT) Y N emPAI 0.09 Strategy.Hits 1 PepMatched(SEQUEST MASCOT) 2 SpectraMatched(SEQUEST MASCOT) 0

\*Des: PREDICTED: similar to pyruvate kinase 3

SEQUEST:(PepMatched Observed.Hits Coverage) 2 1 3.57%

| Seq                | Charge | Xcor  | Delta | Probability | PepHits |  |  |
|--------------------|--------|-------|-------|-------------|---------|--|--|
| ITLPVDFVTADKFDENAK | +2     | 4.886 | 0.540 | 1.0000      | 4       |  |  |
| AGGFLMKK           | +2     | 2.767 | 0.260 | 0.9878      | 2       |  |  |

MASCOT:(PepMatched Observed.Hits Coverage)

No. 833. Protein IPI00200013 Matched (SEQUEST MASCOT) Y Y emPAI 0.99 Strategy.Hits 2 PepMatched(SEQUEST MASCOT) 3 SpectraMatched(SEQUEST MASCOT) 6

\*Des: PREDICTED: cAMP-dependent protein kinase catalytic subunit alpha

SEQUEST:(PepMatched Observed.Hits Coverage) 3 1 15.68%

| Seq                     | Charge | Xcor  | Delta | Probability | PepHits |  |  |
|-------------------------|--------|-------|-------|-------------|---------|--|--|
| KWETPSQNTAQLDHFDR       | +3     | 4.812 | 0.446 | 1.0000      | 2       |  |  |
| DLKPENLLIDQQGYIQTDFGFAK | +3     | 7.422 | 0.648 | 1.0000      | 3       |  |  |
| ILQAVNFPFLVK            | +2     | 4.182 | 0.302 | 0.9991      | 2       |  |  |

MASCOT:(PepMatched Observed.Hits Coverage) 7 2 31.65%

| Seq                     | Charge | ObservedMS | ExpectedMS | CalculatedMS |      |    | PepScore | PepHits |
|-------------------------|--------|------------|------------|--------------|------|----|----------|---------|
| TLGTGSFGR               | +2     | 448.24     | 894.46     | 894.46       | 0    | 45 | 12       |         |
| KWETPSQNTAQLDHFDR       | +3     | 691.67     | 2071.99    | 2071.97      | 0.02 | 55 | 2        |         |
| NLLQVDLTK               | +2     | 522.31     | 1042.61    | 1042.60      | 0.01 | 48 | 1        |         |
| ILQAVNFPFLVK            | +2     | 694.92     | 1387.83    | 1387.82      | 0.01 | 71 | 4        |         |
| DLKPENLLIDQQGYIQTDFGFAK | +3     | 918.15     | 2751.43    | 2751.41      | 0.02 | 58 | 6        |         |
| WFATTDWIAIYQR           | +2     | 835.93     | 1669.84    | 1669.83      | 0.01 | 84 | 4        |         |

Identified Human Platelet Proteins

DNSNLYMVMMEYVPGGEMFSLR +3 863.73 2588.17 2588.15 0.02 44 8

No. Protein Matched (SEQUEST MASCOT) emPAI Strategy.Hits PepMatched(SEQUEST MASCOT) SpectraMatched(SEQUEST MASCOT)  
 834. IPI00476644 N Y 0.77 1 0 5 0 9

\*Des: 50 kDa protein

SEQUEST:(PepMatched Observed.Hits Coverage)

MASCOT:(PepMatched Observed.Hits Coverage) 5 1 20.72%

| Seq                       | Charge | ObservedMS | ExpectedMS | CalculatedMS |      | Pepscore | PepHits |
|---------------------------|--------|------------|------------|--------------|------|----------|---------|
| VVQQSVLEVDER              | +2     | 700.87     | 1399.73    | 1399.73      | 0    | 73       | 1       |
| IFSTSADLSELSAVAR          | +2     | 833.94     | 1665.86    | 1665.86      | 0    | 74       | 2       |
| LILVDYILFK                | +2     | 618.88     | 1235.75    | 1235.75      | 0    | 59       | 4       |
| HDGNVIFSPFGLSVAMVNLMLGAK  | +3     | 839.77     | 2516.30    | 2516.29      | 0.01 | 51       | 2       |
| VQVENGLNLQALSQAGPLILPALFK | +3     | 878.51     | 2632.50    | 2632.50      | 0    | 56       | 2       |

No. Protein Matched (SEQUEST MASCOT) emPAI Strategy.Hits PepMatched(SEQUEST MASCOT) SpectraMatched(SEQUEST MASCOT)  
 835. IPI00203358 Y N 0.26 2 5 0 11 0

\*Des: Splice Isoform Gamma-1 of Serine/threonine protein phosphatase PP1-gamma catalytic subunit

SEQUEST:(PepMatched Observed.Hits Coverage) 5 2 23.1%

| Seq                    | Charge | Xcor  | Delta | Proability | PepHits |  |  |
|------------------------|--------|-------|-------|------------|---------|--|--|
| AHQVVEDGYEFAK          | +3     | 3.998 | 0.560 | 1.0000     | 2       |  |  |
| LNIDSIIQR              | +2     | 2.743 | 0.177 | 0.9531     | 2       |  |  |
| YPENFFLLR              | +2     | 2.702 | 0.399 | 0.9983     | 2       |  |  |
| LFEYGGFPPESNYLFLGDYVDR | +3     | 5.890 | 0.513 | 1.0000     | 4       |  |  |
| EIFLSQPILLELEAPLK      | +2     | 4.949 | 0.520 | 1.0000     | 3       |  |  |

MASCOT:(PepMatched Observed.Hits Coverage)

No. Protein Matched (SEQUEST MASCOT) emPAI Strategy.Hits PepMatched(SEQUEST MASCOT) SpectraMatched(SEQUEST MASCOT)  
 836. IPI00190557 Y Y 0.59 4 10 8 21 16

\*Des: B-cell receptor-associated protein 37

SEQUEST:(PepMatched Observed.Hits Coverage) 10 4 48.02%

| Seq                 | Charge | Xcor  | Delta | Proability | PepHits |  |  |
|---------------------|--------|-------|-------|------------|---------|--|--|
| LGLDYEER            | +2     | 2.780 | 0.497 | 0.9995     | 3       |  |  |
| VLSRPNAQELPSMYQR    | +2     | 4.281 | 0.415 | 0.9995     | 2       |  |  |
| FNASQLITQR          | +2     | 3.550 | 0.359 | 0.9988     | 2       |  |  |
| LLLGAGAVAYGVR       | +2     | 4.513 | 0.486 | 0.9999     | 1       |  |  |
| DLQMVNISR           | +2     | 2.853 | 0.246 | 0.9773     | 2       |  |  |
| IGGVQQDTILAEGLHFR   | +3     | 5.074 | 0.532 | 1.0000     | 3       |  |  |
| IVQAEGEAEAAK        | +2     | 3.815 | 0.507 | 0.9998     | 1       |  |  |
| IYLTADNLVLNLQDESFTR | +2     | 5.646 | 0.595 | 1.0000     | 3       |  |  |
| IPWFQYPIIDIR        | +2     | 4.146 | 0.496 | 0.9998     | 4       |  |  |
| DFSLILDDVAITELSFRR  | +2     | 3.612 | 0.512 | 0.9997     | 1       |  |  |

MASCOT:(PepMatched Observed.Hits Coverage) 8 4 34.53%

| Seq              | Charge | ObservedMS | ExpectedMS | CalculatedMS |      | Pepscore | PepHits |
|------------------|--------|------------|------------|--------------|------|----------|---------|
| LGLDYEER         | +2     | 497.75     | 993.48     | 993.48       | 0    | 54       | 4       |
| IVQAEGEAEAAK     | +2     | 608.32     | 1214.62    | 1214.61      | 0.01 | 72       | 1       |
| VLSRPNAQELPSMYQR | +2     | 944.99     | 1887.97    | 1887.96      | 0.01 | 42       | 2       |
| AQVSLIR          | +2     | 451.27     | 900.53     | 898.56       | 1.97 | 42       | 3       |



Identified Human Platelet Proteins

|                   |    |        |         |         |      |    |   |
|-------------------|----|--------|---------|---------|------|----|---|
| FNASQLITQR        | +2 | 589.32 | 1176.63 | 1176.63 | 0    | 55 | 3 |
| LLLGAGAVAYGVR     | +2 | 630.38 | 1258.74 | 1258.74 | 0    | 76 | 1 |
| IGGVQQDTILAEGLHFR | +2 | 927.50 | 1852.99 | 1852.98 | 0.01 | 87 | 3 |
| IPWFQYPIIDIR      | +2 | 862.46 | 1722.91 | 1722.91 | 0    | 49 | 4 |

| No.   | Protein                                     | Matched (SEQUEST MASCOT) | emPAI      | Strategy.Hits | PepMatched(SEQUEST MASCOT) | SpectraMatched(SEQUEST MASCOT) |
|-------|---------------------------------------------|--------------------------|------------|---------------|----------------------------|--------------------------------|
| 837.  | IPI00190559                                 | Y Y                      | 0.62       | 2             | 3                          | 5                              |
| *Des: | Bendless protein                            |                          |            |               |                            |                                |
|       | SEQUEST:(PepMatched Observed.Hits Coverage) |                          | 3          | 1             | 39.35%                     |                                |
|       | Seq                                         | Charge Xcor              | Delta      | Probability   | PepHits                    |                                |
|       | LLAEPVPGIKAEPDESNAR                         | +2                       | 4.020      | 0.671         | 1.0000                     | 1                              |
|       | SNEAQAIETAR                                 | +2                       | 3.471      | 0.549         | 0.9966                     | 1                              |
|       | TVLLSIQALLSAPNPDDPLANDVAEQWK                | +3                       | 4.556      | 0.628         | 0.9998                     | 1                              |
|       | MASCOT:(PepMatched Observed.Hits Coverage)  |                          | 2          | 1             | 15.48%                     |                                |
|       | Seq                                         | Charge ObservedMS        | ExpectedMS | CalculatedMS  |                            | Pepscore PepHits               |
|       | SNEAQAIETAR                                 | +2                       | 595.2975   | 1188.5804     | 1188.5734                  | 0.01 54 4                      |
|       | IYHPNVDKLGR                                 | +2                       | 656.3666   | 1310.7186     | 1310.7095                  | 0.01 41 2                      |
