# Supplementary material
Source: PubMed Central journal article supplement (PMC4302335)
Supplement: NIHMS258838-supplement-Table_3.pdf [file NIHMS258838-supplement-Table_3.pdf]

**Identified Human Platelet Proteins**

|              |                                                            |                                 |                      |                                   |                                       |          |         |    |  |  |
|--------------|------------------------------------------------------------|---------------------------------|----------------------|-----------------------------------|---------------------------------------|----------|---------|----|--|--|
| <b>No.</b>   | <b>Protein</b>                                             | <b>Matched (SEQUEST MASCOT)</b> | <b>Strategy.Hits</b> | <b>PepMatched(SEQUEST MASCOT)</b> | <b>SpectraMatched(SEQUEST MASCOT)</b> |          |         |    |  |  |
| 1.           | IPI00179964                                                | Y Y                             | 1                    | 2 3                               | 8                                     | 45       |         |    |  |  |
| <b>*Des:</b> | Splice Isoform 1 of Polypyrimidine tract-binding protein 1 |                                 |                      |                                   |                                       |          |         |    |  |  |
|              | SEQUEST:(PepMatched Observed.Hits Coverage)                |                                 | 2                    | 1                                 | 6.29%                                 |          |         |    |  |  |
|              | Seq                                                        | Charge Xcor                     | Delta                | Probility                         | PepHits                               |          |         |    |  |  |
|              | GQPIYIQFSNHK                                               | +2                              | 3.571                | 0.617                             | 1.0000                                | 7        |         |    |  |  |
|              | NNQFQALLQYADPVSAQHAK                                       | +2                              | 5.666                | 0.554                             | 1.0000                                | 6        |         |    |  |  |
|              | MASCOT:(PepMatched Observed.Hits Coverage)                 |                                 | 3                    | 1                                 | 7.96%                                 |          |         |    |  |  |
|              | Seq                                                        | Charge ObservedMS               | ExpectedMS           | CalculatedMS                      |                                       | Pepscore | PepHits |    |  |  |
|              | NNQFQALLQYADPVSAQHAK                                       | +2                              | 1122.0696            | 2242.1246                         | 2242.1130                             | 0.01     | 90      | 12 |  |  |
|              | HQNVQLPR                                                   | +2                              | 496.2750             | 990.5355                          | 990.5359                              | 0        | 50      | 14 |  |  |
|              | GQPIYIQFSNHK                                               | +2                              | 716.3723             | 1430.7301                         | 1430.7306                             | 0        | 62      | 23 |  |  |
|              |                                                            |                                 |                      |                                   |                                       |          |         |    |  |  |
| <b>No.</b>   | <b>Protein</b>                                             | <b>Matched (SEQUEST MASCOT)</b> | <b>Strategy.Hits</b> | <b>PepMatched(SEQUEST MASCOT)</b> | <b>SpectraMatched(SEQUEST MASCOT)</b> |          |         |    |  |  |
| 2.           | IPI00290566                                                | N Y                             | 1                    | 0 2                               | 0                                     | 2        |         |    |  |  |
| <b>*Des:</b> | T-complex protein 1, alpha subunit                         |                                 |                      |                                   |                                       |          |         |    |  |  |
|              | SEQUEST:(PepMatched Observed.Hits Coverage)                |                                 |                      |                                   |                                       |          |         |    |  |  |
|              | MASCOT:(PepMatched Observed.Hits Coverage)                 |                                 | 2                    | 1                                 | 5.65%                                 |          |         |    |  |  |
|              | Seq                                                        | Charge ObservedMS               | ExpectedMS           | CalculatedMS                      |                                       | Pepscore | PepHits |    |  |  |
|              | YPVNSVNILK                                                 | +2                              | 573.8633             | 1145.7120                         | 1145.6444                             | 0.07     | 36      | 1  |  |  |
|              | MLVDDIGDVTITNDGATILK                                       | +2                              | 1052.6138            | 2103.2130                         | 2103.0769                             | 0.14     | 35      | 1  |  |  |
|              |                                                            |                                 |                      |                                   |                                       |          |         |    |  |  |
| <b>No.</b>   | <b>Protein</b>                                             | <b>Matched (SEQUEST MASCOT)</b> | <b>Strategy.Hits</b> | <b>PepMatched(SEQUEST MASCOT)</b> | <b>SpectraMatched(SEQUEST MASCOT)</b> |          |         |    |  |  |
| 3.           | IPI00411463                                                | N Y                             | 1                    | 0 2                               | 0                                     | 3        |         |    |  |  |
| <b>*Des:</b> | Protein                                                    |                                 |                      |                                   |                                       |          |         |    |  |  |
|              | SEQUEST:(PepMatched Observed.Hits Coverage)                |                                 |                      |                                   |                                       |          |         |    |  |  |
|              | MASCOT:(PepMatched Observed.Hits Coverage)                 |                                 | 2                    | 1                                 | 15.86%                                |          |         |    |  |  |
|              | Seq                                                        | Charge ObservedMS               | ExpectedMS           | CalculatedMS                      |                                       | Pepscore | PepHits |    |  |  |
|              | AEYEFLTPVEEAPK                                             | +2                              | 876.4215             | 1750.8285                         | 1750.8301                             | 0        | 44      | 4  |  |  |
|              | SIQEIQELDKDDESLR                                           | +2                              | 959.4737             | 1916.9328                         | 1916.9327                             | 0        | 68      | 4  |  |  |
|              |                                                            |                                 |                      |                                   |                                       |          |         |    |  |  |
| <b>No.</b>   | <b>Protein</b>                                             | <b>Matched (SEQUEST MASCOT)</b> | <b>Strategy.Hits</b> | <b>PepMatched(SEQUEST MASCOT)</b> | <b>SpectraMatched(SEQUEST MASCOT)</b> |          |         |    |  |  |
| 4.           | IPI00178083                                                | Y Y                             | 1                    | 2 6                               | 9                                     | 79       |         |    |  |  |
| <b>*Des:</b> | 29 kDa protein                                             |                                 |                      |                                   |                                       |          |         |    |  |  |
|              | SEQUEST:(PepMatched Observed.Hits Coverage)                |                                 | 2                    | 2                                 | 11.06%                                |          |         |    |  |  |
|              | Seq                                                        | Charge Xcor                     | Delta                | Probility                         | PepHits                               |          |         |    |  |  |
|              | KLVIIEGDLER                                                | +2                              | 2.809                | 0.482                             | 0.9878                                | 3        |         |    |  |  |
|              | KIQVLQQADDAEER                                             | +3                              | 3.005                | 0.521                             | 0.9991                                | 4        |         |    |  |  |
|              | MASCOT:(PepMatched Observed.Hits Coverage)                 |                                 | 6                    | 2                                 | 23.71%                                |          |         |    |  |  |
|              | Seq                                                        | Charge ObservedMS               | ExpectedMS           | CalculatedMS                      |                                       | Pepscore | PepHits |    |  |  |
|              | IQVLQQADDAEERAER                                           | +3                              | 666.9992             | 1997.9758                         | 1997.9766                             | 0        | 43      | 3  |  |  |
|              | MELQEIQLK                                                  | +2                              | 566.3065             | 1130.5985                         | 1130.6005                             | 0        | 67      | 7  |  |  |
|              | KLVIIEGDLER                                                | +2                              | 642.8793             | 1283.7440                         | 1283.7448                             | 0        | 72      | 15 |  |  |
|              | DEEKMELQEIQLK                                              | +2                              | 816.9113             | 1631.8080                         | 1631.8076                             | 0        | 58      | 7  |  |  |
|              | KIQVLQQADDAEER                                             | +2                              | 885.9533             | 1769.8921                         | 1769.8907                             | 0        | 88      | 33 |  |  |
|              | IQVLQQADDAEER                                              | +2                              | 821.9056             | 1641.7966                         | 1641.7958                             | 0        | 94      | 31 |  |  |

**Identified Human Platelet Proteins**

No. Protein Matched (SEQUEST MASCOT) Strategy.Hits PepMatched(SEQUEST MASCOT) SpectraMatched(SEQUEST MASCOT)  
 5. IPI00166931 N Y 1 0 3 0 3

\*Des: PRUNE-like protein

SEQUEST:(PepMatched Observed.Hits Coverage)

MASCOT:(PepMatched Observed.Hits Coverage) 3 1 9.11%

| Seq            | Charge | ObservedMS | ExpectedMS | CalculatedMS | PepScore | PepHits |
|----------------|--------|------------|------------|--------------|----------|---------|
| ILQGAPEILDR    | +2     | 612.8872   | 1223.7598  | 1223.6873    | 0.07     | 74 1    |
| IPSGQPETADVSR  | +2     | 678.8909   | 1355.7672  | 1355.6681    | 0.1      | 79 1    |
| TTEAEVFPVVLNIK | +2     | 845.0118   | 1688.0090  | 1687.9032    | 0.11     | 47 1    |

No. Protein Matched (SEQUEST MASCOT) Strategy.Hits PepMatched(SEQUEST MASCOT) SpectraMatched(SEQUEST MASCOT)  
 6. IPI00027444 Y Y 2 2 2 5 3

\*Des: Leukocyte elastase inhibitor

SEQUEST:(PepMatched Observed.Hits Coverage) 2 5 8.03%

| Seq                            | Charge | Xcor  | Delta | Probability | PepHits |
|--------------------------------|--------|-------|-------|-------------|---------|
| VLELPYQGEELSMVILLPDDIEDESTGLKK | +3     | 3.502 | 0.433 | 0.9848      | 1       |
| VLELPYQGEELSMVILLPDDIEDESTGLK  | +3     | 5.387 | 0.443 | 0.9939      | 1       |

MASCOT:(PepMatched Observed.Hits Coverage) 2 3 8.03%

| Seq                            | Charge | ObservedMS | ExpectedMS | CalculatedMS | PepScore | PepHits |
|--------------------------------|--------|------------|------------|--------------|----------|---------|
| VLELPYQGEELSMVILLPDDIEDESTGLK  | +3     | 1082.5522  | 3244.6349  | 3244.6311    | 0        | 43 3    |
| VLELPYQGEELSMVILLPDDIEDESTGLKK | +3     | 1125.2484  | 3372.7234  | 3372.7261    | 0        | 72 3    |

No. Protein Matched (SEQUEST MASCOT) Strategy.Hits PepMatched(SEQUEST MASCOT) SpectraMatched(SEQUEST MASCOT)  
 7. IPI00024107 Y Y 1 3 3 7 18

\*Des: Splice Isoform 1 of Alpha-synuclein

SEQUEST:(PepMatched Observed.Hits Coverage) 3 1 27.27%

| Seq                  | Charge | Xcor  | Delta | Probability | PepHits |
|----------------------|--------|-------|-------|-------------|---------|
| TVEGAGSIAAATGFVKK    | +2     | 2.984 | 0.633 | 0.9919      | 2       |
| TVEGAGSIAAATGFVK     | +2     | 4.131 | 0.687 | 0.9965      | 2       |
| EQVTNVGGAVVTGVTAVAQK | +3     | 5.488 | 0.574 | 1.0000      | 4       |

MASCOT:(PepMatched Observed.Hits Coverage) 3 2 27.97%

| Seq                    | Charge | ObservedMS | ExpectedMS | CalculatedMS | PepScore | PepHits |
|------------------------|--------|------------|------------|--------------|----------|---------|
| TVEGAGSIAAATGFVK       | +2     | 739.8994   | 1477.7843  | 1477.7776    | 0.01     | 59 3    |
| EQVTNVGGAVVTGVTAVAQK   | +2     | 964.5286   | 1927.0427  | 1927.0374    | 0.01     | 100 12  |
| TKEQVTNVGGAVVTGVTAVAQK | +3     | 719.7343   | 2156.1809  | 2156.1800    | 0        | 71 6    |

No. Protein Matched (SEQUEST MASCOT) Strategy.Hits PepMatched(SEQUEST MASCOT) SpectraMatched(SEQUEST MASCOT)  
 8. IPI00556409 N Y 1 0 2 0 2

\*Des: Dematin variant

SEQUEST:(PepMatched Observed.Hits Coverage)

MASCOT:(PepMatched Observed.Hits Coverage) 2 1 4.74%

| Seq          | Charge | ObservedMS | ExpectedMS | CalculatedMS | PepScore | PepHits |
|--------------|--------|------------|------------|--------------|----------|---------|
| SPGIISQASAPR | +2     | 592.3676   | 1182.7206  | 1182.6357    | 0.08     | 47 1    |
| VFAMSPPEEFGK | +2     | 621.3455   | 1240.6764  | 1240.5797    | 0.1      | 50 1    |

No. Protein Matched (SEQUEST MASCOT) Strategy.Hits PepMatched(SEQUEST MASCOT) SpectraMatched(SEQUEST MASCOT)  
 9. IPI00022431 N Y 1 0 2 0 3

Identified Human Platelet Proteins

\*Des: Alpha-2-HS-glycoprotein precursor  
 SEQUEST:(PepMatched Observed.Hits Coverage)  
 MASCOT:(PepMatched Observed.Hits Coverage) 2 1 8.55%  
 Seq Charge ObservedMS ExpectedMS CalculatedMS Pepscore PepHits  
 HTLNQIDEVK +2 598.8605 1195.7064 1195.6197 0.09 48 3  
 HTFMGVVSLGSPSGEVSHPR +3 694.3885 2080.1437 2080.0159 0.13 47 1

No. Protein Matched (SEQUEST MASCOT) Strategy.Hits PepMatched(SEQUEST MASCOT) SpectraMatched(SEQUEST MASCOT)  
 10. IPI00019359 Y Y 1 9 11 38 52

\*Des: Keratin 9  
 SEQUEST:(PepMatched Observed.Hits Coverage) 9 1 32.96%  
 Seq Charge Xcor Delta Probility PepHits  
 GSRGGSGGSYGGGGSGGGYGGGSGSR +3 7.749 0.687 1.0000 9  
 SGGGGGGGLGSGGSIR +2 5.243 0.574 1.0000 12  
 GSGGSHGGSGFGGESGGSYGGGEEASGSGGGYGGGSGK +3 6.256 0.967 1.0000 11  
 HGVQELEIELQSQLSK +3 3.622 0.446 0.9943 2  
 TLNDRMRQEYQLIAK +2 3.535 0.497 0.9688 11  
 DIENQYETQITQIEHEVSSSGQEVQSSAK +3 6.073 0.712 1.0000 3  
 GGGGSGFGYSYGGGSGGGFASLGGGFGGSR +2 3.287 0.722 1.0000 10  
 IGLGRRGGSGGSYGR +2 3.115 0.478 0.9550 12  
 QGVDADINGLR +2 2.876 0.534 0.9823 1  
 MASCOT:(PepMatched Observed.Hits Coverage) 11 1 32.33%  
 Seq Charge ObservedMS ExpectedMS CalculatedMS Pepscore PepHits  
 SGGGGGGGLGSGGSIR +2 616.8022 1231.5898 1231.5904 0 119 13  
 GSGGYSYGGGSGGGYGGGSGSR +2 896.3696 1790.7247 1790.7203 0 160 7  
 GSRGGSGGSYGGGGSGGGYGGGSGSR +3 697.9653 2090.8740 2090.8748 0 126 8  
 GSGGSHGGSGFGGESGGSYGGGEEASGSGGGYGGGSGK +3 1075.1028 3222.2865 3222.2740 0.01 80 11  
 IGLGRRGGSGGSYGR +2 675.8475 1349.6805 1349.6799 0 42 12  
 TLNDRMRQEYQLIAK +2 926.4684 1850.9222 1850.9196 0 59 11  
 DIENQYETQITQIEHEVSSSGQEVQSSAK +3 1088.8467 3263.5182 3263.5065 0.01 85 3  
 TLLDIDNTR +2 530.7822 1059.5499 1059.5560 0 54 5  
 GGGGSGFGYSYGGGSGGGFASLGGGFGGSR +2 1353.0834 2704.1522 2704.1536 0 66 7  
 NRKDIENQYETQITQIEHEVSSSGQEVQSSAK +3 1221.5911 3661.7514 3661.7455 0.01 72 2  
 QGVDADINGLR +2 579.3006 1156.5866 1156.5836 0 51 1

No. Protein Matched (SEQUEST MASCOT) Strategy.Hits PepMatched(SEQUEST MASCOT) SpectraMatched(SEQUEST MASCOT)  
 11. IPI00022434 Y Y 2 4 5 27 70

\*Des: ALB protein  
 SEQUEST:(PepMatched Observed.Hits Coverage) 4 13 10.81%  
 Seq Charge Xcor Delta Probility PepHits  
 DVFLGMFLYEYAR +2 4.056 0.582 0.9946 21  
 QNCELFEQLGEYK +2 3.048 0.532 0.9860 2  
 AVMDFFAAFVEK +2 2.886 0.514 0.9818 2  
 SHCIAEVENDEMPADLPSLAADFVESK +3 6.064 0.495 1.0000 7  
 MASCOT:(PepMatched Observed.Hits Coverage) 5 12 8.46%  
 Seq Charge ObservedMS ExpectedMS CalculatedMS Pepscore PepHits  
 KVPQVSTPTLVEVSR +2 820.4744 1638.9342 1638.9304 0 88 49

Identified Human Platelet Proteins

|                    |    |          |           |           |   |    |    |  |
|--------------------|----|----------|-----------|-----------|---|----|----|--|
| AFKAWAVAR          | +2 | 510.2919 | 1018.5693 | 1018.5712 | 0 | 64 | 5  |  |
| YTKKVPQVSTPTLVEVSR | +3 | 678.0530 | 2031.1371 | 2031.1364 | 0 | 67 | 12 |  |
| FQNALLVR           | +2 | 480.7862 | 959.5578  | 959.5552  | 0 | 65 | 12 |  |
| AEFAEVSKLVTDLTK    | +2 | 825.9515 | 1649.8885 | 1649.8875 | 0 | 77 | 12 |  |

No. 12. Protein IPI00022508 Matched (SEQUEST MASCOT) N Y Strategy.Hits 2 0 PepMatched(SEQUEST MASCOT) 2 0 SpectraMatched(SEQUEST MASCOT) 5

\*Des: Src kinase-associated phosphoprotein 55-related protein

SEQUEST:(PepMatched Observed.Hits Coverage)

MASCOT:(PepMatched Observed.Hits Coverage) 2 10 15.34%

| Seq                                  | Charge | ObservedMS | ExpectedMS | CalculatedMS | PepScore | PepHits |
|--------------------------------------|--------|------------|------------|--------------|----------|---------|
| FVLQDMESDIIPEDYDER                   | +2     | 1107.5001  | 2212.9857  | 2212.9834    | 0        | 49 2    |
| SIYLQEFQDKGDAEDGEEYDDPFAGPPDTISLASER | +3     | 1335.6012  | 4003.7818  | 4003.7758    | 0.01     | 107 2   |

No. 13. Protein IPI00554737 Matched (SEQUEST MASCOT) N Y Strategy.Hits 1 0 PepMatched(SEQUEST MASCOT) 4 0 SpectraMatched(SEQUEST MASCOT) 6

\*Des: Serine/threonine protein phosphatase 2A, 65 kDa regulatory subunit A, alpha isoform

SEQUEST:(PepMatched Observed.Hits Coverage)

MASCOT:(PepMatched Observed.Hits Coverage) 4 1 11.37%

| Seq                  | Charge | ObservedMS | ExpectedMS | CalculatedMS | PepScore | PepHits |
|----------------------|--------|------------|------------|--------------|----------|---------|
| LAGGDWFTSR           | +2     | 555.3079   | 1108.6012  | 1108.5301    | 0.07     | 70 1    |
| SALASVIMGLSPILGK     | +2     | 779.0080   | 1556.0014  | 1555.9007    | 0.1      | 88 1    |
| IGPILDNSTLQSEVKPILEK | +3     | 732.1192   | 2193.3358  | 2193.2256    | 0.11     | 41 1    |
| QLSQSLLPAIVELAEDAK   | +3     | 642.4021   | 1924.1845  | 1924.0517    | 0.13     | 47 3    |

No. 14. Protein IPI00000875 Matched (SEQUEST MASCOT) N Y Strategy.Hits 1 0 PepMatched(SEQUEST MASCOT) 4 0 SpectraMatched(SEQUEST MASCOT) 4

\*Des: Elongation factor 1-gamma

SEQUEST:(PepMatched Observed.Hits Coverage)

MASCOT:(PepMatched Observed.Hits Coverage) 4 1 11.48%

| Seq            | Charge | ObservedMS | ExpectedMS | CalculatedMS | PepScore | PepHits |
|----------------|--------|------------|------------|--------------|----------|---------|
| ILGLLDAYLK     | +2     | 559.8717   | 1117.7288  | 1117.6747    | 0.05     | 62 1    |
| STFVLDEFKR     | +2     | 621.3758   | 1240.7370  | 1240.6451    | 0.09     | 53 1    |
| ALIAAQYSGAQVR  | +2     | 674.4148   | 1346.8150  | 1346.7306    | 0.08     | 50 1    |
| KLDPGSEETQTLVR | +2     | 786.9775   | 1571.9404  | 1571.8155    | 0.12     | 66 1    |

No. 15. Protein IPI00298994 Matched (SEQUEST MASCOT) Y Y Strategy.Hits 3 32 PepMatched(SEQUEST MASCOT) 57 138 SpectraMatched(SEQUEST MASCOT) 171

\*Des: Talin 1

SEQUEST:(PepMatched Observed.Hits Coverage) 32 24 21.9%

| Seq                          | Charge | Xcor  | Delta | Proability | PepHits |
|------------------------------|--------|-------|-------|------------|---------|
| LASEAKPAAVAEENEEIGSHIK       | +3     | 5.541 | 0.608 | 1.0000     | 5       |
| QAAASATQTIAAAQHAASTPK        | +2     | 4.755 | 0.614 | 1.0000     | 16      |
| TLREQGVEEHETLLLR             | +3     | 4.631 | 0.607 | 1.0000     | 10      |
| VGKVEHGSVALPAIMR             | +2     | 5.262 | 0.682 | 1.0000     | 22      |
| RQFVQSAKEVANSTANLVK          | +3     | 5.474 | 0.571 | 1.0000     | 5       |
| SGASGPENFQVGSMPPAQQQITSGQMHR | +3     | 6.263 | 0.651 | 1.0000     | 8       |

Identified Human Platelet Proteins

|                                            |        |            |            |              |      |     |                  |
|--------------------------------------------|--------|------------|------------|--------------|------|-----|------------------|
| LHTDDELNWLHDGR                             | +3     | 3.307      | 0.600      | 0.9990       | 3    |     |                  |
| ALAVNPRDPPSWSVLGHRSR                       | +3     | 6.319      | 0.620      | 1.0000       | 21   |     |                  |
| AIAVTVQEMVTK                               | +2     | 4.536      | 0.601      | 1.0000       | 14   |     |                  |
| NGNLPEFGDAISTASK                           | +2     | 3.306      | 0.546      | 0.9843       | 7    |     |                  |
| TAKAIAVTVQEMVTK                            | +2     | 4.574      | 0.617      | 1.0000       | 2    |     |                  |
| VLVQNAAGSQEKLAQAQSSVATITR                  | +3     | 3.187      | 0.386      | 0.9772       | 1    |     |                  |
| NLGTALAE LR                                | +2     | 2.226      | 0.553      | 0.9728       | 10   |     |                  |
| SNTSPEELGPLANQLTSDYGR                      | +2     | 4.139      | 0.612      | 1.0000       | 2    |     |                  |
| GLAGAVSELLR                                | +2     | 3.951      | 0.445      | 0.9855       | 10   |     |                  |
| VGAIPANALDDGQWSQGLISAAR                    | +2     | 5.656      | 0.730      | 1.0000       | 18   |     |                  |
| AGFLDLKDFLPKEYVK                           | +3     | 3.346      | 0.421      | 0.9922       | 1    |     |                  |
| GSQAQPDSPSAQLALIAASQSFLQPGGK               | +3     | 4.948      | 0.583      | 0.9993       | 3    |     |                  |
| VSQMAQYFEPLTLAAVGAASK                      | +2     | 5.022      | 0.615      | 1.0000       | 1    |     |                  |
| AVSSAIAQLLGEVAQGNENYAGIAAR                 | +3     | 4.643      | 0.524      | 0.9984       | 3    |     |                  |
| AATAPLLEAVDNLSAFASNPEFSSIPAQISPEGR         | +4     | 5.664      | 0.665      | 1.0000       | 4    |     |                  |
| LASEAKPAAVAAENEEIGSHIKHR                   | +3     | 5.537      | 0.601      | 1.0000       | 4    |     |                  |
| LKQKLHTDDELNWLHDGR                         | +3     | 5.533      | 0.626      | 1.0000       | 2    |     |                  |
| AAQKAAAFEEQENETVVVKEK                      | +3     | 3.785      | 0.548      | 0.9987       | 1    |     |                  |
| AEASQLGHKVSQMAQYFEPLTLAAVGAASK             | +3     | 4.623      | 0.628      | 1.0000       | 2    |     |                  |
| MATNAAAQNAIKKK                             | +2     | 2.916      | 0.571      | 0.9703       | 4    |     |                  |
| KSTVLQQQYNR                                | +2     | 3.406      | 0.454      | 0.9813       | 3    |     |                  |
| VLGEAMTGISQNAK                             | +2     | 4.081      | 0.652      | 1.0000       | 4    |     |                  |
| TLSHPPQMALLDQTK                            | +2     | 3.311      | 0.462      | 0.9755       | 7    |     |                  |
| AVASAAAALVLKAK                             | +2     | 3.288      | 0.528      | 0.9707       | 1    |     |                  |
| LAQVAKAVTQALNR                             | +2     | 2.706      | 0.592      | 0.9692       | 2    |     |                  |
| EADESLNFEEQILEAAK                          | +2     | 4.758      | 0.553      | 1.0000       | 2    |     |                  |
| MASCOT:(PepMatched Observed.Hits Coverage) |        | 57         | 24         | 36.72%       |      |     |                  |
| Seq                                        | Charge | ObservedMS | ExpectedMS | CalculatedMS |      |     | Pepscore PepHits |
| ALGDLISATK                                 | +2     | 494.8130   | 987.6114   | 987.5600     | 0.05 | 65  | 3                |
| SIAAATSALVK                                | +2     | 516.3282   | 1030.6418  | 1030.6022    | 0.04 | 35  | 2                |
| ALDYMYLR                                   | +2     | 522.7936   | 1043.5726  | 1043.5110    | 0.06 | 48  | 1                |
| NLGTALAE LR                                | +2     | 529.3370   | 1056.6594  | 1056.5927    | 0.07 | 48  | 2                |
| TSTPEDFIR                                  | +2     | 533.2958   | 1064.5770  | 1064.5138    | 0.06 | 65  | 3                |
| AVASAAAALVLK                               | +2     | 542.8655   | 1083.7164  | 1083.6651    | 0.05 | 41  | 9                |
| GLAGAVSELLR                                | +2     | 543.3536   | 1084.6926  | 1084.6240    | 0.07 | 54  | 7                |
| TYGVSFLLVK                                 | +2     | 580.8563   | 1159.6980  | 1159.6277    | 0.07 | 42  | 1                |
| ALSTDPAAPNLK                               | +2     | 599.3688   | 1196.7230  | 1196.6401    | 0.08 | 62  | 3                |
| VMVTNVTSLK                                 | +2     | 602.8734   | 1203.7322  | 1203.6897    | 0.04 | 51  | 2                |
| VGDDPAVWQLK                                | +2     | 614.3638   | 1226.7130  | 1226.6295    | 0.08 | 68  | 4                |
| AIAVTVQEMVTK                               | +2     | 645.4009   | 1288.7872  | 1288.7060    | 0.08 | 49  | 2                |
| VSHVLAALQAGNR                              | +2     | 668.4190   | 1334.8234  | 1334.7418    | 0.08 | 92  | 2                |
| AGFLDLKDFLPK                               | +2     | 682.4009   | 1362.7872  | 1362.7547    | 0.03 | 63  | 2                |
| VEHGSVALPAIMR                              | +2     | 690.4091   | 1378.8036  | 1378.7390    | 0.06 | 52  | 3                |
| DPPSWSVLGHRSR                              | +3     | 470.2630   | 1407.7672  | 1407.6895    | 0.08 | 56  | 2                |
| LAQAAQSSVATITR                             | +2     | 708.9262   | 1415.8378  | 1415.7732    | 0.06 | 105 | 3                |
| VLGEAMTGISQNAK                             | +2     | 709.9131   | 1417.8116  | 1417.7235    | 0.09 | 89  | 2                |
| EAAHYHEVAPDVR                              | +2     | 727.4146   | 1452.8146  | 1452.6997    | 0.11 | 44  | 3                |

Identified Human Platelet Proteins

|                                     |    |           |           |           |       |     |    |  |  |
|-------------------------------------|----|-----------|-----------|-----------|-------|-----|----|--|--|
| ILAQATSDLVNAIK                      | +2 | 728.9302  | 1455.8458 | 1455.8297 | 0.02  | 84  | 10 |  |  |
| EVIQEWNLNIK                         | +2 | 743.9226  | 1485.8306 | 1485.7827 | 0.05  | 51  | 1  |  |  |
| AVAEQIPLLQGVV                       | +2 | 746.9594  | 1491.9042 | 1491.8772 | 0.03  | 67  | 1  |  |  |
| IGITNHDEYSLVR                       | +2 | 758.9164  | 1515.8182 | 1515.7681 | 0.05  | 79  | 4  |  |  |
| TLAESALQLLYTAK                      | +2 | 761.4210  | 1520.8274 | 1520.8450 | -0.01 | 122 | 13 |  |  |
| DPVQLNLLYVQAR                       | +2 | 764.9786  | 1527.9426 | 1527.8409 | 0.1   | 34  | 1  |  |  |
| DDILNGSHPVSFDK                      | +2 | 772.4317  | 1542.8488 | 1542.7314 | 0.12  | 74  | 4  |  |  |
| EQGVVEHETLLLR                       | +2 | 776.9442  | 1551.8738 | 1551.7892 | 0.08  | 66  | 4  |  |  |
| VAGSVTELIQAAEAMK                    | +2 | 809.4285  | 1616.8424 | 1616.8443 | 0     | 95  | 9  |  |  |
| NGNLPEFGDAISTASK                    | +2 | 810.9310  | 1619.8474 | 1619.7791 | 0.07  | 56  | 2  |  |  |
| EVIQEWNLNIKR                        | +2 | 821.9974  | 1641.9802 | 1641.8838 | 0.1   | 66  | 1  |  |  |
| TLSHPPQMALDQTK                      | +2 | 855.9764  | 1709.9382 | 1709.8770 | 0.06  | 61  | 3  |  |  |
| TKEVIQEWNLNIK                       | +2 | 858.5154  | 1715.0162 | 1714.9253 | 0.09  | 67  | 2  |  |  |
| LHTDDELNWLHDHGR                     | +2 | 860.9446  | 1719.8746 | 1719.7965 | 0.08  | 108 | 3  |  |  |
| RVAGSVTELIQAAEAMK                   | +2 | 887.5220  | 1773.0294 | 1772.9454 | 0.08  | 74  | 1  |  |  |
| DLDAQSLAAVSQQLAPR                   | +2 | 892.0128  | 1782.0110 | 1781.9271 | 0.08  | 130 | 2  |  |  |
| MVGGIAQIIAAQEEMLR                   | +2 | 915.5050  | 1828.9954 | 1828.9538 | 0.04  | 98  | 2  |  |  |
| EADESLNFEEQILEAAK                   | +2 | 968.4874  | 1934.9602 | 1934.9108 | 0.05  | 111 | 12 |  |  |
| MVGGIAQIIAAQEEMLRK                  | +2 | 979.5771  | 1957.1396 | 1957.0488 | 0.09  | 49  | 2  |  |  |
| QAAASATQTIAAAQHAASSTPK              | +2 | 998.0678  | 1994.1210 | 1994.0181 | 0.1   | 83  | 3  |  |  |
| LNEAAAGLNQAATELVQASR                | +2 | 1014.0289 | 2026.0432 | 2026.0442 | 0     | 90  | 4  |  |  |
| LLSDSLPPSTGTFQEAQSR                 | +2 | 1017.5758 | 2033.1370 | 2033.0065 | 0.13  | 70  | 2  |  |  |
| GVGAAATAVTQALNELLQHVK               | +2 | 1046.1080 | 2090.2014 | 2090.1483 | 0.05  | 94  | 14 |  |  |
| LLAALLEDEGGSGRPLLQAAK               | +2 | 1061.6121 | 2121.2096 | 2121.1793 | 0.03  | 72  | 1  |  |  |
| VSQMAQYFEPLTLAAVGAASK               | +3 | 728.0916  | 2181.2530 | 2181.1139 | 0.14  | 88  | 2  |  |  |
| LGAASLGAEDPETQVVLINAVK              | +2 | 1098.1273 | 2194.2400 | 2194.1844 | 0.06  | 68  | 3  |  |  |
| LASEAKPAAVAEENEEIGSHIK              | +3 | 745.7524  | 2234.2354 | 2234.1542 | 0.08  | 85  | 3  |  |  |
| SNTSPEELGPLANQLTSDYGR               | +2 | 1125.0957 | 2248.1768 | 2248.0607 | 0.12  | 88  | 1  |  |  |
| VGAIPANALDDGQWSQGLISAAR             | +2 | 1155.6056 | 2309.1966 | 2309.1763 | 0.02  | 75  | 2  |  |  |
| GVAALTSDPAVQAIVLDTASDVLDK           | +3 | 823.8138  | 2468.4196 | 2468.3009 | 0.12  | 111 | 8  |  |  |
| SKDHFGLEGDEESTMLEDSVSPK             | +3 | 846.4287  | 2536.2643 | 2536.1275 | 0.14  | 73  | 2  |  |  |
| AVSSAIAQLLGEVAQGNENYAGIAAR          | +3 | 858.4967  | 2572.4683 | 2572.3244 | 0.14  | 97  | 5  |  |  |
| FGQDFSTFLEAGVEMAGQAPSQEDR           | +3 | 906.4883  | 2716.4431 | 2716.2074 | 0.24  | 48  | 2  |  |  |
| GSQAQPDSPSAQLALIAASQSFLQPGGK        | +3 | 918.8633  | 2753.5681 | 2753.3983 | 0.17  | 74  | 2  |  |  |
| FFYSDQNVDSRDPVQLNLLYVQAR            | +3 | 963.2191  | 2886.6355 | 2886.4300 | 0.21  | 34  | 1  |  |  |
| SGASGPENFQVGSMPPAQQQITSGQMHR        | +3 | 976.5034  | 2926.4884 | 2926.3449 | 0.14  | 61  | 5  |  |  |
| GTEWVDPEDPTVIAENELLGAAAAIEAAAK      | +2 | 1526.3049 | 3050.5952 | 3050.5083 | 0.09  | 59  | 9  |  |  |
| AATAPLLEAVDNLNSAFASNPEFSSIPAQISPEGR | +4 | 868.4960  | 3469.9549 | 3469.7364 | 0.22  | 72  | 13 |  |  |

|       |                                             |                          |               |                            |                                |      |          |         |
|-------|---------------------------------------------|--------------------------|---------------|----------------------------|--------------------------------|------|----------|---------|
| No.   | Protein                                     | Matched (SEQUEST MASCOT) | Strategy.Hits | PepMatched(SEQUEST MASCOT) | SpectraMatched(SEQUEST MASCOT) |      |          |         |
| 16.   | IPI00015148                                 | N                        | Y             | 1                          | 0                              | 3    | 0        | 8       |
| *Des: | Ras-related protein Rap-1b                  |                          |               |                            |                                |      |          |         |
|       | SEQUEST:(PepMatched Observed.Hits Coverage) |                          |               |                            |                                |      |          |         |
|       | MASCOT:(PepMatched Observed.Hits Coverage)  |                          |               |                            |                                |      |          |         |
|       | Seq                                         | Charge                   | ObservedMS    | ExpectedMS                 | CalculatedMS                   |      | Pepscore | PepHits |
|       | LVVLGSGGVGK                                 | +2                       | 493.3336      | 984.6526                   | 984.5967                       | 0.06 | 42       | 20      |
|       | INVNEIFYDLVR                                | +2                       | 747.9427      | 1493.8708                  | 1493.7878                      | 0.08 | 77       | 8       |

Identified Human Platelet Proteins

SKINVNEIFYDLVR +2 855.5132 1709.0118 1708.9147 0.1 63 10

No. Protein Matched (SEQUEST MASCOT) Strategy.Hits PepMatched(SEQUEST MASCOT) SpectraMatched(SEQUEST MASCOT)  
 17. IPI00075248 N Y 1 0 3 0 12

\*Des: Calmodulin

SEQUEST:(PepMatched Observed.Hits Coverage)

MASCOT:(PepMatched Observed.Hits Coverage) 3 2 33.77%

| Seq              | Charge | ObservedMS | ExpectedMS | CalculatedMS   | Pepscore | PepHits |
|------------------|--------|------------|------------|----------------|----------|---------|
| VFDKDGNGYISAAELR | +2     | 878.4315   | 1754.8484  | 1753.8634 0.99 | 50       | 18      |
| EAFSLFDKDGDTITTK | +3     | 615.6348   | 1843.8827  | 1843.8839 0    | 60       | 24      |
| MKDTDSEEEIREAFR  | +3     | 619.2853   | 1854.8342  | 1854.8417 0    | 44       | 6       |

No. Protein Matched (SEQUEST MASCOT) Strategy.Hits PepMatched(SEQUEST MASCOT) SpectraMatched(SEQUEST MASCOT)  
 18. IPI00010133 N Y 1 0 3 0 7

\*Des: Coronin-1A

SEQUEST:(PepMatched Observed.Hits Coverage)

MASCOT:(PepMatched Observed.Hits Coverage) 3 1 6.18%

| Seq              | Charge | ObservedMS | ExpectedMS | CalculatedMS   | Pepscore | PepHits |
|------------------|--------|------------|------------|----------------|----------|---------|
| LQATVQELQK       | +2     | 579.3613   | 1156.7080  | 1156.6452 0.06 | 61       | 2       |
| KLQATVQELQK      | +2     | 643.4063   | 1284.7980  | 1284.7401 0.06 | 67       | 2       |
| AAPEASGTPSSDAVSR | +2     | 751.9095   | 1501.8044  | 1501.7008 0.1  | 51       | 4       |

No. Protein Matched (SEQUEST MASCOT) Strategy.Hits PepMatched(SEQUEST MASCOT) SpectraMatched(SEQUEST MASCOT)  
 19. IPI00220278 N Y 1 0 4 0 12

\*Des: Myosin regulatory light chain 2, smooth muscle isoform

SEQUEST:(PepMatched Observed.Hits Coverage)

MASCOT:(PepMatched Observed.Hits Coverage) 4 5 43.1%

| Seq                            | Charge | ObservedMS | ExpectedMS | CalculatedMS             | Pepscore | PepHits |
|--------------------------------|--------|------------|------------|--------------------------|----------|---------|
| GNFNVEFTR                      | +2     | 623.7966   | 1245.5787  | 1245.5778 0              | 43       | 2       |
| FTDEEVDEMYR                    | +2     | 717.2985   | 1432.5824  | 1432.5816 0              | 73       | 5       |
| NAFACFDEEASGFIHEDHLR           | +3     | 770.0067   | 2306.9983  | 2307.0014 0              | 48       | 2       |
| NPTDEYLEGMMSEAPGPINFTMFLTMFGEK | +3     |            | 1133.1788  | 3396.5147 3396.5061 0.01 | 105      | 5       |

No. Protein Matched (SEQUEST MASCOT) Strategy.Hits PepMatched(SEQUEST MASCOT) SpectraMatched(SEQUEST MASCOT)  
 20. IPI00017184 Y Y 2 2 7 4 8

\*Des: EH-domain containing protein 1

SEQUEST:(PepMatched Observed.Hits Coverage) 2 1 7.36%

| Seq                     | Charge | Xcor  | Delta | Probility | PepHits |
|-------------------------|--------|-------|-------|-----------|---------|
| LADVVDKDLLDDEEFALANHLIK | +3     | 5.130 | 0.517 | 0.9988    | 3       |
| LLDTVDDMLANDIAR         | +2     | 3.108 | 0.492 | 0.9861    | 2       |

MASCOT:(PepMatched Observed.Hits Coverage) 7 3 20.44%

| Seq             | Charge | ObservedMS | ExpectedMS | CalculatedMS   | Pepscore | PepHits |
|-----------------|--------|------------|------------|----------------|----------|---------|
| HLIEQDFPGMR     | +2     | 671.8732   | 1341.7318  | 1341.6499 0.08 | 45       | 1       |
| QEESLMPSQVVK    | +2     | 687.8893   | 1373.7640  | 1373.6860 0.08 | 52       | 1       |
| ELVNNLGEIYQK    | +2     | 710.4113   | 1418.8080  | 1418.7405 0.07 | 60       | 1       |
| EPELFQTVAEGLR   | +2     | 744.9263   | 1487.8380  | 1487.7619 0.08 | 42       | 1       |
| LLDTVDDMLANDIAR | +2     | 837.9569   | 1673.8992  | 1673.8294 0.07 | 127      | 1       |

Identified Human Platelet Proteins

|                         |    |          |           |           |      |    |   |
|-------------------------|----|----------|-----------|-----------|------|----|---|
| LFEAEEQDLFKDIQSLPR      | +3 | 726.7532 | 2177.2378 | 2177.1004 | 0.14 | 49 | 1 |
| LADVDDKGLLDDEEFALANHLIK | +3 | 852.1530 | 2553.4372 | 2553.2962 | 0.14 | 56 | 2 |

No. 21. Protein IPI00019502 Matched (SEQUEST MASCOT) Y Y Strategy.Hits 3 13 PepMatched(SEQUEST MASCOT) 64 40 SpectraMatched(SEQUEST MASCOT) 121

\*Des: Myosin heavy chain, nonmuscle type A

| SEQUEST:(PepMatched Observed.Hits Coverage) | 13     | 24    | 10.83% |
|---------------------------------------------|--------|-------|--------|
| Seq                                         | Charge | Xcor  | Delta  |
| IAQLEEQLDNETK                               | +2     | 3.394 | 0.561  |
| IAQLEEELEEEQGNTLINDR                        | +2     | 6.886 | 0.601  |
| MQQNIQELEEQLLEEEESAR                        | +2     | 5.276 | 0.599  |
| TQLEEELEDELQATEDAK                          | +2     | 6.707 | 0.598  |
| ELESQISELQEDLESER                           | +2     | 4.571 | 0.610  |
| IRELESQISELQEDLESER                         | +3     | 5.112 | 0.501  |
| LQQLDLDLVDLDHQR                             | +3     | 2.831 | 0.427  |
| DFSALESQEQDTQELLQEENR                       | +3     | 6.836 | 0.590  |
| SMEAEMIQLQEELAAAER                          | +2     | 5.343 | 0.528  |
| ALEQQVEEMKTQLEEELEDELQATEDAK                | +3     | 6.377 | 0.587  |
| DLGEELEALKTELEDTLSTAAQQELR                  | +3     | 5.440 | 0.539  |
| EMAELEDER                                   | +2     | 3.171 | 0.488  |
| ELEDATETADAMNR                              | +2     | 3.610 | 0.642  |

| MASCOT:(PepMatched Observed.Hits Coverage) | 64     | 23         | 40.54%     |
|--------------------------------------------|--------|------------|------------|
| Seq                                        | Charge | ObservedMS | ExpectedMS |
| VVFQEFR                                    | +2     | 462.7828   | 923.5510   |
| LEVNLQAMK                                  | +2     | 523.3217   | 1044.6288  |
| KLVWVPSDK                                  | +2     | 536.3369   | 1070.6592  |
| RGDLPFVPR                                  | +2     | 578.3580   | 1154.7014  |
| TEMEDLMSSK                                 | +2     | 585.7963   | 1169.5780  |
| ALELDSNLYR                                 | +2     | 597.3307   | 1192.6468  |
| ALEQQVEEMK                                 | +2     | 602.8339   | 1203.6532  |
| TDLLLEPYNK                                 | +2     | 603.3651   | 1204.7156  |
| KFDQLLAEEK                                 | +2     | 610.8659   | 1219.7172  |
| AGVLAHLEEER                                | +2     | 612.3452   | 1222.6758  |
| YEILTPNSIPK                                | +2     | 637.8900   | 1273.7654  |
| EQADFAIEALAK                               | +2     | 653.3952   | 1304.7758  |
| HEAMITDLEER                                | +2     | 672.3667   | 1342.7188  |
| DELADEIANSSGK                              | +2     | 674.8513   | 1347.6880  |
| VDYKADEWLMK                                | +2     | 699.3752   | 1396.7358  |
| KVEAQLQELQVK                               | +2     | 706.9526   | 1411.8906  |
| QIATLHAQVADMK                              | +2     | 713.4272   | 1424.8398  |
| VIQYLAYVASSHK                              | +2     | 739.9258   | 1477.8370  |
| VISGVLQLGNIVFK                             | +2     | 743.9511   | 1485.8876  |
| IAQLEEQLDNETK                              | +2     | 765.9354   | 1529.8562  |
| QRYEILTPNSIPK                              | +2     | 779.9785   | 1557.9424  |
| ELEDATETADAMNR                             | +2     | 783.3960   | 1564.7774  |
| VSHLLGINVDFTR                              | +2     | 786.4570   | 1570.8994  |
| NKHEAMITDLEER                              | +2     | 793.4446   | 1584.8746  |



Identified Human Platelet Proteins

|                                 |          |           |           |           |           |      |    |   |
|---------------------------------|----------|-----------|-----------|-----------|-----------|------|----|---|
| KVIQYLAYVASSHK +3               | 536.3356 | 1605.9850 | 1605.8878 | 0.1       | 38        | 1    |    |   |
| IMGIPEEEQMGLLR +2               | 808.4288 | 1614.8430 | 1614.8109 | 0.03      | 57        | 1    |    |   |
| IAEFTTNLTETEEEK +2              | 827.4384 | 1652.8622 | 1652.7781 | 0.08      | 107       | 10   |    |   |
| NFINNPLAQADWAAK +2              |          | 836.9523  | 1671.8900 | 1671.8369 | 0.05      | 81   | 1  |   |
| TEMEDLMSSKDDVVGK +2             |          | 842.9218  | 1683.8290 | 1683.7331 | 0.1       | 83   | 2  |   |
| NLPIYSEEIVEMYK +2               | 864.4481 | 1726.8816 | 1726.8487 | 0.03      | 73        | 2    |    |   |
| QTLENERGELANEVK +2              |          | 865.4818  | 1728.9490 | 1728.8642 | 0.08      | 54   | 2  |   |
| LTEMETLQSQLMAEK +2              |          | 876.4518  | 1750.8890 | 1750.8481 | 0.04      | 78   | 1  |   |
| IAQLEEQLDNETKER +3              |          | 606.0129  | 1815.0169 | 1814.9010 | 0.12      | 57   | 1  |   |
| HSQAVEELAEQLEQTK +2             |          | 920.4988  | 1838.9830 | 1838.9010 | 0.08      | 92   | 2  |   |
| EQLEEEEAKHNLEK +2               |          | 928.0153  | 1854.0160 | 1853.8642 | 0.15      | 42   | 5  |   |
| ANLQIDQINTDLNLER +2             |          | 935.5261  | 1869.0376 | 1868.9592 | 0.08      | 101  | 1  |   |
| HEMPPHIYAITDTAYR +3             |          | 639.0237  | 1914.0493 | 1913.9094 | 0.14      | 59   | 2  |   |
| TELEDTLSTAAQQELR +2             |          | 960.5397  | 1919.0648 | 1918.9120 | 0.15      | 105  | 1  |   |
| LQVELDNVTGLLSQSDSK +2           |          | 973.5528  | 1945.0910 | 1945.0004 | 0.09      | 102  | 10 |   |
| LQQLDLDLLVDLDHQR +3             |          | 650.6906  | 1949.0500 | 1948.9854 | 0.06      | 82   | 10 |   |
| TQLEEELEDELQATEDAK +2           |          | 981.5022  | 1960.9898 | 1960.9113 | 0.08      | 98   | 1  |   |
| HSQAVEELAEQLEQTKR +3            |          | 666.0421  | 1995.1045 | 1995.0021 | 0.1       | 95   | 5  |   |
| KANLQIDQINTDLNLER +2            |          | 999.5797  | 1997.1448 | 1997.0541 | 0.09      | 112  | 1  |   |
| IIGLDQVAGMSETALPGAFK +3         |          | 673.4070  | 2017.1992 | 2017.0553 | 0.14      | 71   | 2  |   |
| ELESQISELQEDLESER +2            |          | 1017.5165 | 2033.0184 | 2032.9436 | 0.07      | 62   | 1  |   |
| TLEEEAKTHEAQIQEMR +4            |          | 511.5369  | 2042.1185 | 2041.9738 | 0.14      | 88   | 2  |   |
| SMEAEMIQLEELAAAER +2            |          | 1024.9948 | 2047.9750 | 2047.9554 | 0.02      | 122  | 2  |   |
| QAQQRDELADEIANSSGK +2           |          | 1045.0607 | 2088.1068 | 2087.9719 | 0.13      | 52   | 2  |   |
| NMDPLNDNIATLLHQSSDK +3          |          | 709.3685  | 2125.0837 | 2125.0110 | 0.07      | 59   | 2  |   |
| TRLQQLDLDLLVDLDHQR +3           |          | 736.4366  | 2206.2880 | 2206.1342 | 0.15      | 63   | 1  |   |
| IRELESQISELQEDLESER +2          |          | 1152.1252 | 2302.2358 | 2302.1288 | 0.11      | 70   | 2  |   |
| MQQNIQELEEQLLEEEESAR +3         |          | 778.4182  | 2332.2328 | 2332.0488 | 0.18      | 80   | 2  |   |
| KMQQNIQELEEQLLEEEESAR +2        |          | 1231.1458 | 2460.2770 | 2460.1438 | 0.13      | 46   | 2  |   |
| LQQLFNHTMFILEQEEYQR +3          |          | 823.1194  | 2466.3364 | 2466.2001 | 0.14      | 92   | 1  |   |
| IAQLEEELEEEQGNTELINDR +2        |          | 1236.6399 | 2471.2652 | 2471.1663 | 0.1       | 84   | 2  |   |
| LEGDSTDLSAQIAELQAQIAELK +2      |          |           | 1244.1937 | 2486.3728 | 2486.2387 | 0.13 | 66 | 1 |
| DFSALESQQLQDTQELLQEENR +3       |          | 831.7673  | 2492.2801 | 2492.1666 | 0.11      | 76   | 2  |   |
| KLEGDSTDLSAQIAELQAQIAELK +3     |          |           | 872.5065  | 2614.4977 | 2614.3337 | 0.16 | 98 | 3 |
| FLSNGHVTIPGQQDKDMFQETMEAMR +4   |          |           | 753.3953  | 3009.5521 | 3009.3782 | 0.17 | 74 | 2 |
| DLGEELEALKTELEDTLSTAAQQELR +4   |          |           | 755.1791  | 3016.6873 | 3016.4724 | 0.21 | 75 | 8 |
| ALEQQVEEMKTQLEEELEDELQATEDAK +3 |          |           | 1049.8944 | 3146.6614 | 3146.4812 | 0.18 | 36 | 1 |
| LDPHLVLDQLR +2                  | 659.9078 | 1317.8010 | 1317.7405 | 0.06      | 51        | 5    |    |   |
| KEEELQAALAR +2                  | 629.3891 | 1256.7636 | 1256.6724 | 0.09      | 36        | 13   |    |   |
| QLLQANPILEAFGNAK +2             |          | 864.0026  | 1725.9906 | 1725.9413 | 0.05      | 70   | 13 |   |

| No.   | Protein                                              | Matched (SEQUEST MASCOT) | Strategy | Hits  | PepMatched (SEQUEST MASCOT) | SpectraMatched (SEQUEST MASCOT) |
|-------|------------------------------------------------------|--------------------------|----------|-------|-----------------------------|---------------------------------|
| 22.   | IPI00412272                                          | Y                        | Y        | 1     | 2                           | 20                              |
| *Des: | SH3 domain-binding glutamic acid-rich-like protein 2 |                          |          |       |                             |                                 |
|       | SEQUEST:(PepMatched Observed.Hits Coverage)          |                          |          | 2     | 1                           | 32.11%                          |
|       | Seq                                                  | Charge                   | Xcor     | Delta | Probability                 | PepHits                         |
|       | YCGDYDSFFESK                                         | +2                       |          | 3.595 | 0.601                       | 0.9944                          |
|       |                                                      |                          |          |       |                             | 2                               |

Identified Human Platelet Proteins

|       |                                             |                          |               |                            |                                |           |      |          |         |
|-------|---------------------------------------------|--------------------------|---------------|----------------------------|--------------------------------|-----------|------|----------|---------|
|       | FLEANKIEFEEVDITMSEEQR                       | +2                       |               | 6.087                      | 0.604                          | 1.0000    | 22   |          |         |
|       | MASCOT:(PepMatched Observed.Hits Coverage)  |                          |               | 2                          | 1                              | 32.11%    |      |          |         |
|       | Seq                                         | Charge                   | ObservedMS    | ExpectedMS                 | CalculatedMS                   |           |      | PepScore | PepHits |
|       | YCGDYDSFFESK                                | +2                       | 730.7883      | 1459.5621                  | 1459.5602                      | 0         | 56   | 2        |         |
|       | FLEANKIEFEEVDITMSEEQR                       | +2                       |               | 1279.1093                  | 2556.2040                      | 2556.2053 | 0    | 105      | 22      |
| No.   | Protein                                     | Matched (SEQUEST MASCOT) | Strategy.Hits | PepMatched(SEQUEST MASCOT) | SpectraMatched(SEQUEST MASCOT) |           |      |          |         |
| 23.   | IPI00396399                                 | N                        | Y             | 1                          | 0                              | 5         | 0    | 5        |         |
| *Des: | Androgen receptor coactivator ARA55         |                          |               |                            |                                |           |      |          |         |
|       | SEQUEST:(PepMatched Observed.Hits Coverage) |                          |               |                            |                                |           |      |          |         |
|       | MASCOT:(PepMatched Observed.Hits Coverage)  |                          |               | 5                          | 1                              | 16.59%    |      |          |         |
|       | Seq                                         | Charge                   | ObservedMS    | ExpectedMS                 | CalculatedMS                   |           |      | PepScore | PepHits |
|       | LMASLSDFR                                   | +2                       | 520.3069      | 1038.5992                  | 1038.5168                      | 0.08      | 52   | 1        |         |
|       | DFLQLFAPR                                   | +2                       | 553.8453      | 1105.6760                  | 1105.5920                      | 0.08      | 45   | 1        |         |
|       | ASATSATLELDR                                | +2                       | 617.8629      | 1233.7112                  | 1233.6201                      | 0.09      | 74   | 1        |         |
|       | GSLDTMLGLLQSDLSR                            | +2                       |               | 853.4966                   | 1704.9786                      | 1704.8716 | 0.11 | 97       | 1       |
|       | LLQELNATQFNITDEIMSQFPSSK                    | +3                       |               | 918.8560                   | 2753.5462                      | 2753.3581 | 0.19 | 38       | 1       |
| No.   | Protein                                     | Matched (SEQUEST MASCOT) | Strategy.Hits | PepMatched(SEQUEST MASCOT) | SpectraMatched(SEQUEST MASCOT) |           |      |          |         |
| 24.   | IPI00219953                                 | Y                        | N             | 1                          | 2                              | 0         | 5    | 0        |         |
| *Des: | UMP-CMP kinase variant                      |                          |               |                            |                                |           |      |          |         |
|       | SEQUEST:(PepMatched Observed.Hits Coverage) |                          |               | 2                          | 2                              | 7.32%     |      |          |         |
|       | Seq                                         | Charge                   | Xcor          | Delta                      | Probility                      | PepHits   |      |          |         |
|       | SVDEVFDEVVQIFDK                             | +2                       |               | 5.281                      | 0.582                          | 0.9969    | 3    |          |         |
|       | SVDEVFDEVVQIFDKE                            | +3                       |               | 4.125                      | 0.569                          | 1.0000    | 4    |          |         |
|       | MASCOT:(PepMatched Observed.Hits Coverage)  |                          |               |                            |                                |           |      |          |         |
| No.   | Protein                                     | Matched (SEQUEST MASCOT) | Strategy.Hits | PepMatched(SEQUEST MASCOT) | SpectraMatched(SEQUEST MASCOT) |           |      |          |         |
| 25.   | IPI00220857                                 | Y                        | Y             | 1                          | 2                              | 2         | 5    | 6        |         |
| *Des: | Splice Isoform 2 of Calpastatin             |                          |               |                            |                                |           |      |          |         |
|       | SEQUEST:(PepMatched Observed.Hits Coverage) |                          |               | 2                          | 3                              | 5.65%     |      |          |         |
|       | Seq                                         | Charge                   | Xcor          | Delta                      | Probility                      | PepHits   |      |          |         |
|       | DTSQSDKLDDALDKLSDSLGQR                      | +3                       |               | 5.111                      | 0.529                          | 1.0000    | 2    |          |         |
|       | SESELIDELSEDFDR                             | +2                       | 3.883         | 0.577                      | 0.9972                         | 1         |      |          |         |
|       | MASCOT:(PepMatched Observed.Hits Coverage)  |                          |               | 2                          | 1                              | 5.65%     |      |          |         |
|       | Seq                                         | Charge                   | ObservedMS    | ExpectedMS                 | CalculatedMS                   |           |      | PepScore | PepHits |
|       | SESELIDELSEDFDR                             | +2                       | 892.3974      | 1782.7802                  | 1782.7795                      | 0         | 42   | 3        |         |
|       | DTSQSDKLDDALDKLSDSLGQR                      | +3                       |               | 841.3994                   | 2521.1764                      | 2521.1780 | 0    | 72       | 6       |
| No.   | Protein                                     | Matched (SEQUEST MASCOT) | Strategy.Hits | PepMatched(SEQUEST MASCOT) | SpectraMatched(SEQUEST MASCOT) |           |      |          |         |
| 26.   | IPI00298497                                 | Y                        | Y             | 3                          | 8                              | 14        | 18   | 34       |         |
| *Des: | Fibrinogen beta chain precursor             |                          |               |                            |                                |           |      |          |         |
|       | SEQUEST:(PepMatched Observed.Hits Coverage) |                          |               | 8                          | 22                             | 25.6%     |      |          |         |
|       | Seq                                         | Charge                   | Xcor          | Delta                      | Probility                      | PepHits   |      |          |         |
|       | AHYGGFTVQNEANK                              | +2                       |               | 3.267                      | 0.627                          | 0.9936    | 2    |          |         |
|       | REEAPSLRPAPPPISGGGYR                        | +3                       |               | 3.781                      | 0.624                          | 1.0000    | 4    |          |         |
|       | KGETSEMYLIQPDSSVKPYR                        | +3                       |               | 3.636                      | 0.504                          | 0.9933    | 4    |          |         |

Identified Human Platelet Proteins

| Seq                                        | Charge | ObservedMS | ExpectedMS | CalculatedMS | PepScore  | PepHits |    |   |
|--------------------------------------------|--------|------------|------------|--------------|-----------|---------|----|---|
| DNENVVNEYSSELEK                            | +2     | 4.856      | 0.521      | 0.9944       | 2         |         |    |   |
| EDGGGWYNR                                  | +2     | 2.832      | 0.355      | 0.9642       | 2         |         |    |   |
| HGTDDGVVWMNWK                              | +2     | 3.996      | 0.561      | 0.9942       | 2         |         |    |   |
| YYWGGQYTWDMAK                              | +2     | 3.349      | 0.463      | 0.9863       | 3         |         |    |   |
| MGPTELLIEMEDWK                             | +2     | 4.506      | 0.502      | 0.9935       | 8         |         |    |   |
| MASCOT:(PepMatched Observed.Hits Coverage) |        |            | 14         | 24           | 41.8%     |         |    |   |
| DNDGWLTS DPR                               | +2     | 638.3271   | 1274.6396  | 1274.5527    | 0.09      | 41      | 1  |   |
| QGFQNVATNTDGK                              | +2     | 654.8445   | 1307.6744  | 1307.6105    | 0.06      | 94      | 8  |   |
| AHYGGFTVQNEANK                             | +2     | 768.4140   | 1534.8134  | 1534.7164    | 0.1       | 81      | 8  |   |
| HGTDDGVVWMNWK                              | +2     | 772.8749   | 1543.7352  | 1543.6878    | 0.05      | 68      | 1  |   |
| YYWGGQYTWDMAK                              | +2     | 834.8804   | 1667.7462  | 1667.7078    | 0.04      | 66      | 1  |   |
| MGPTELLIEMEDWK                             | +2     | 846.4680   | 1690.9214  | 1690.7946    | 0.13      | 59      | 1  |   |
| DNENVVNEYSSELEK                            | +2     | 884.9265   | 1767.8384  | 1767.7798    | 0.06      | 80      | 2  |   |
| TMTIHNGMFFSTYDR                            | +3     | 607.6474   | 1819.9204  | 1819.8021    | 0.12      | 59      | 2  |   |
| EEAPSLRPAPPPISGGGYR                        | +3     | 651.0333   | 1950.0781  | 1949.9959    | 0.08      | 42      | 3  |   |
| MGPTELLIEMEDWKGDK                          | +2     | 996.5388   | 1991.0630  | 1990.9379    | 0.13      | 57      | 3  |   |
| HQLYIDETVNSNIPTNLR                         | +2     | 1064.1000  | 2126.1854  | 2126.0756    | 0.11      | 69      | 10 |   |
| GGETSEMYLIQPDSSVKPYR                       | +2     | 1129.1064  | 2256.1982  | 2256.0732    | 0.13      | 81      | 3  |   |
| KGGETSEMYLIQPDSSVKPYR                      | +3     | 795.7752   | 2384.3038  | 2384.1681    | 0.14      | 47      | 2  |   |
| NSVDELNNNVEAVSQTSSSFQMYLLK                 | +2     |            | 1584.3057  | 3166.5968    | 3166.4764 | 0.12    | 58 | 3 |

No. 27. Protein IPI00219018 Matched (SEQUEST MASCOT) Strategy.Y Hits PepMatched(SEQUEST MASCOT) SpectraMatched(SEQUEST MASCOT)

\*Des:

| Seq                                         | Charge | Xcor     | Delta     | Proability | PepHits |
|---------------------------------------------|--------|----------|-----------|------------|---------|
| Hypothetical protein                        |        |          |           |            |         |
| SEQUEST:(PepMatched Observed.Hits Coverage) |        |          | 4         | 4          | 17.59%  |
| VVDLMAHMASK                                 | +2     | 4.176    | 0.664     | 1.0000     | 2       |
| DGRGALQNIIPASTGAAK                          | +2     | 4.817    | 0.589     | 1.0000     | 23      |
| DGRGALQNIIPASTGAAKAVGK                      | +3     | 4.918    | 0.581     | 0.9995     | 10      |
| VIHDNFGIVEGLMTTVHAIATQK                     | +3     | 6.799    | 0.724     | 1.0000     | 7       |
| MASCOT:(PepMatched Observed.Hits Coverage)  |        |          | 8         | 6          | 24.92%  |
| GALQNIIPASTGAAK                             | +2     | 706.3989 | 1410.7833 | 1410.7830  | 0       |
| DGRGALQNIIPASTGAAK                          | +2     | 870.4754 | 1738.9363 | 1738.9325  | 0       |
| GALQNIIPASTGAAKAVGK                         | +2     | 884.0079 | 1766.0013 | 1766.0049  | 0       |
| DGRGALQNIIPASTGAAKAVGK                      | +3     | 699.0592 | 2094.1558 | 2094.1544  | 0       |
| VIHDNFGIVEGLMTTVHAIATQK                     | +3     | 865.7935 | 2594.3585 | 2594.3526  | 0.01    |
| GKVKVGVNGFGR                                | +2     | 609.3593 | 1216.7040 | 1216.7039  | 0       |
| AGAHLQGGAKR                                 | +2     | 533.2988 | 1064.5830 | 1064.5839  | 0       |
| TVDGPSGLWR                                  | +2     | 608.3273 | 1214.6401 | 1214.6407  | 0       |

No. 28. Protein IPI00218070 Matched (SEQUEST MASCOT) Strategy.N Y Hits PepMatched(SEQUEST MASCOT) SpectraMatched(SEQUEST MASCOT)

\*Des:

| Seq                                                             | Charge | ObservedMS | ExpectedMS | CalculatedMS | PepScore | PepHits |
|-----------------------------------------------------------------|--------|------------|------------|--------------|----------|---------|
| Splice Isoform GRB3-3 of Growth factor receptor-bound protein 2 |        |            |            |              |          |         |
| SEQUEST:(PepMatched Observed.Hits Coverage)                     |        |            | 2          | 1            | 24.02%   |         |
| MASCOT:(PepMatched Observed.Hits Coverage)                      |        |            | 2          | 1            | 24.02%   |         |

Identified Human Platelet Proteins

| Seq                           | Charge | ObservedMS | ExpectedMS | CalculatedMS | Pepscore  | PepHits   |
|-------------------------------|--------|------------|------------|--------------|-----------|-----------|
| VLNEECDQNWYK                  | +2     | 770.8437   | 1539.6728  | 1539.6664    | 0.01      | 57        |
| DIEQVPQQPTYVQALFDFDPQEDGELGFR |        |            | +3         | 1127.8696    | 3380.5871 | 3380.5836 |

| No.   | Protein                                        | Matched (SEQUEST MASCOT) | Strategy.Hits | PepMatched(SEQUEST MASCOT) | SpectraMatched(SEQUEST MASCOT) |          |         |
|-------|------------------------------------------------|--------------------------|---------------|----------------------------|--------------------------------|----------|---------|
| 29.   | IPI00172421                                    | Y                        | Y             | 1                          | 2                              |          |         |
| *Des: | S-phase kinase-associated protein 1A isoform a |                          |               |                            |                                |          |         |
|       | SEQUEST:(PepMatched Observed.Hits Coverage)    | 2                        | 1             | 30.06%                     |                                |          |         |
|       | Seq                                            | Charge                   | Xcor          | Delta                      | Probility                      | PepHits  |         |
|       | TMLEDLGMDDEGDDDPVPLPNVNAAILK                   | +3                       | 4.317         | 0.421                      | 0.9949                         | 3        |         |
|       | VDQGTLFELILAANYLDIK                            | +2                       | 5.033         | 0.498                      | 0.9945                         | 2        |         |
|       | MASCOT:(PepMatched Observed.Hits Coverage)     | 2                        | 1             | 30.06%                     |                                |          |         |
|       | Seq                                            | Charge                   | ObservedMS    | ExpectedMS                 | CalculatedMS                   | Pepscore | PepHits |
|       | VDQGTLFELILAANYLDIK                            | +2                       | 1068.5854     | 2135.1563                  | 2135.1514                      | 0        | 65      |
|       | TMLEDLGMDDEGDDDPVPLPNVNAAILK                   | +2                       | 1499.2018     | 2996.3890                  | 2996.3994                      | 0        | 60      |

| No.   | Protein                                     | Matched (SEQUEST MASCOT) | Strategy.Hits | PepMatched(SEQUEST MASCOT) | SpectraMatched(SEQUEST MASCOT) |          |         |
|-------|---------------------------------------------|--------------------------|---------------|----------------------------|--------------------------------|----------|---------|
| 30.   | IPI00017763                                 | Y                        | Y             | 2                          | 2                              |          |         |
| *Des: | Nucleosome assembly protein 1-like 4        |                          |               |                            |                                |          |         |
|       | SEQUEST:(PepMatched Observed.Hits Coverage) | 2                        | 4             | 12.3%                      |                                |          |         |
|       | Seq                                         | Charge                   | Xcor          | Delta                      | Probility                      | PepHits  |         |
|       | ASGDGESLDEDESEFTLASDFEIGHFFR                | +3                       | 3.326         | 0.474                      | 0.9947                         | 1        |         |
|       | NVDMLSELVQEYDEPILK                          | +2                       | 5.063         | 0.454                      | 0.9947                         | 1        |         |
|       | MASCOT:(PepMatched Observed.Hits Coverage)  | 3                        | 4             | 13.87%                     |                                |          |         |
|       | Seq                                         | Charge                   | ObservedMS    | ExpectedMS                 | CalculatedMS                   | Pepscore | PepHits |
|       | QVPNESFFNFFNPLK                             | +2                       | 914.5198      | 1827.0250                  | 1826.8991                      | 0.13     | 38      |
|       | LDNVPHTPSSYIETLPK                           | +3                       | 637.7023      | 1910.0851                  | 1909.9785                      | 0.11     | 50      |
|       | NVDMLSELVQEYDEPILK                          | +2                       | 1068.1027     | 2134.1908                  | 2134.0503                      | 0.14     | 47      |

| No.   | Protein                                     | Matched (SEQUEST MASCOT) | Strategy.Hits | PepMatched(SEQUEST MASCOT) | SpectraMatched(SEQUEST MASCOT) |          |         |
|-------|---------------------------------------------|--------------------------|---------------|----------------------------|--------------------------------|----------|---------|
| 31.   | IPI00014424                                 | Y                        | Y             | 2                          | 2                              |          |         |
| *Des: | Elongation factor 1-alpha 2                 |                          |               |                            |                                |          |         |
|       | SEQUEST:(PepMatched Observed.Hits Coverage) | 2                        | 1             | 5.09%                      |                                |          |         |
|       | Seq                                         | Charge                   | Xcor          | Delta                      | Probility                      | PepHits  |         |
|       | EHALLAYTLGVK                                | +2                       | 3.479         | 0.605                      | 0.9895                         | 2        |         |
|       | STTTGHLIYK                                  | +2                       | 2.721         | 0.469                      | 0.9730                         | 4        |         |
|       | MASCOT:(PepMatched Observed.Hits Coverage)  | 2                        | 1             | 4.45%                      |                                |          |         |
|       | Seq                                         | Charge                   | ObservedMS    | ExpectedMS                 | CalculatedMS                   | Pepscore | PepHits |
|       | LPLQDVYK                                    | +2                       | 488.3129      | 974.6112                   | 974.5437                       | 0.07     | 41      |
|       | IGGIGTVPVGR                                 | +2                       | 513.3383      | 1024.6620                  | 1024.6029                      | 0.06     | 52      |

| No.   | Protein                                     | Matched (SEQUEST MASCOT) | Strategy.Hits | PepMatched(SEQUEST MASCOT) | SpectraMatched(SEQUEST MASCOT) |         |
|-------|---------------------------------------------|--------------------------|---------------|----------------------------|--------------------------------|---------|
| 32.   | IPI00022445                                 | Y                        | Y             | 1                          | 2                              |         |
| *Des: | Platelet basic protein precursor            |                          |               |                            |                                |         |
|       | SEQUEST:(PepMatched Observed.Hits Coverage) | 2                        | 1             | 20.61%                     |                                |         |
|       | Seq                                         | Charge                   | Xcor          | Delta                      | Probility                      | PepHits |
|       | NIQSLEVIK                                   | +2                       | 2.832         | 0.384                      | 0.9713                         | 4       |

Identified Human Platelet Proteins

|                                            |                                                                                               |                              |                 |                              |                                  |           |          |         |   |
|--------------------------------------------|-----------------------------------------------------------------------------------------------|------------------------------|-----------------|------------------------------|----------------------------------|-----------|----------|---------|---|
|                                            | GKEESLSDSLYAELR                                                                               | +2                           | 5.649           | 0.547                        | 1.0000                           | 11        |          |         |   |
| MASCOT:(PepMatched Observed.Hits Coverage) |                                                                                               |                              | 3               | 7                            | 20.61%                           |           |          |         |   |
|                                            | Seq                                                                                           | Charge                       | ObservedMS      | ExpectedMS                   | CalculatedMS                     |           | PepScore | PepHits |   |
|                                            | NIQSLEVIGK                                                                                    | +2                           | 550.8199        | 1099.6253                    | 1099.6237                        | 0         | 44       | 2       |   |
|                                            | EESLSDSLYAELR                                                                                 | +2                           | 770.3624        | 1538.7103                    | 1538.7100                        | 0         | 76       | 12      |   |
|                                            | GKEESLSDSLYAELR                                                                               | +2                           | 862.9215        | 1723.8285                    | 1723.8264                        | 0         | 133      | 6       |   |
| No. 33.                                    | Protein IPI00178744                                                                           | Matched (SEQUEST MASCOT) N Y | Strategy.Hits 1 | PepMatched(SEQUEST MASCOT) 0 | SpectraMatched(SEQUEST MASCOT) 5 |           |          |         |   |
| *Des:                                      | Splice Isoform 2 of Acyl-CoA dehydrogenase, very-long-chain specific, mitochondrial precursor |                              |                 |                              |                                  |           |          |         |   |
|                                            | SEQUEST:(PepMatched Observed.Hits Coverage)                                                   |                              |                 |                              |                                  |           |          |         |   |
|                                            | MASCOT:(PepMatched Observed.Hits Coverage)                                                    |                              | 5               | 1                            | 11.8%                            |           |          |         |   |
|                                            | Seq                                                                                           | Charge                       | ObservedMS      | ExpectedMS                   | CalculatedMS                     |           | PepScore | PepHits |   |
|                                            | TPVTDPATGAVK                                                                                  | +2                           | 578.8470        | 1155.6794                    | 1155.6135                        | 0.07      | 37       | 4       |   |
|                                            | IFEGTNDILR                                                                                    | +2                           | 589.3497        | 1176.6848                    | 1176.6138                        | 0.07      | 82       | 4       |   |
|                                            | NPFGNAGLLLGEAGK                                                                               | +2                           | 729.4260        | 1456.8374                    | 1456.7673                        | 0.07      | 70       | 4       |   |
|                                            | VPSENVLGEVGSQFK                                                                               | +2                           | 759.9379        | 1517.8612                    | 1517.7725                        | 0.09      | 80       | 4       |   |
|                                            | AGLGSGLSLGSLVHPELSR                                                                           | +3                           | 617.3766        | 1849.1080                    | 1849.0057                        | 0.1       | 48       | 4       |   |
| No. 34.                                    | Protein IPI00219526                                                                           | Matched (SEQUEST MASCOT) N Y | Strategy.Hits 1 | PepMatched(SEQUEST MASCOT) 0 | SpectraMatched(SEQUEST MASCOT) 3 |           |          |         |   |
| *Des:                                      | Phosphoglucomutase 1                                                                          |                              |                 |                              |                                  |           |          |         |   |
|                                            | SEQUEST:(PepMatched Observed.Hits Coverage)                                                   |                              |                 |                              |                                  |           |          |         |   |
|                                            | MASCOT:(PepMatched Observed.Hits Coverage)                                                    |                              | 3               | 1                            | 8.04%                            |           |          |         |   |
|                                            | Seq                                                                                           | Charge                       | ObservedMS      | ExpectedMS                   | CalculatedMS                     |           | PepScore | PepHits |   |
|                                            | IALYETPTGWK                                                                                   | +2                           | 639.8779        | 1277.7412                    | 1277.6656                        | 0.08      | 47       | 1       |   |
|                                            | FNISNGGPAPEAITDK                                                                              | +2                           | 815.9624        | 1629.9102                    | 1629.7998                        | 0.11      | 56       | 1       |   |
|                                            | ADNFEYSDPVDGSISR                                                                              | +2                           | 886.4670        | 1770.9194                    | 1770.7696                        | 0.15      | 58       | 1       |   |
| No. 35.                                    | Protein IPI00513808                                                                           | Matched (SEQUEST MASCOT) N Y | Strategy.Hits 1 | PepMatched(SEQUEST MASCOT) 0 | SpectraMatched(SEQUEST MASCOT) 3 |           |          |         |   |
| *Des:                                      | Eukaryotic translation elongation factor 1 alpha 1                                            |                              |                 |                              |                                  |           |          |         |   |
|                                            | SEQUEST:(PepMatched Observed.Hits Coverage)                                                   |                              |                 |                              |                                  |           |          |         |   |
|                                            | MASCOT:(PepMatched Observed.Hits Coverage)                                                    |                              | 3               | 1                            | 9.51%                            |           |          |         |   |
|                                            | Seq                                                                                           | Charge                       | ObservedMS      | ExpectedMS                   | CalculatedMS                     |           | PepScore | PepHits |   |
|                                            | STTTGHLIYK                                                                                    | +2                           | 560.8033        | 1119.5921                    | 1119.5924                        | 0         | 45       | 7       |   |
|                                            | EHALLAYTLGVK                                                                                  | +2                           | 657.8741        | 1313.7337                    | 1313.7343                        | 0         | 50       | 3       |   |
|                                            | YYVTIIDAPGHR                                                                                  | +2                           | 702.8671        | 1403.7197                    | 1403.7197                        | 0         | 60       | 18      |   |
| No. 36.                                    | Protein IPI00413587                                                                           | Matched (SEQUEST MASCOT) N Y | Strategy.Hits 1 | PepMatched(SEQUEST MASCOT) 0 | SpectraMatched(SEQUEST MASCOT) 2 |           |          |         |   |
| *Des:                                      | BH3 interacting domain death agonist                                                          |                              |                 |                              |                                  |           |          |         |   |
|                                            | SEQUEST:(PepMatched Observed.Hits Coverage)                                                   |                              |                 |                              |                                  |           |          |         |   |
|                                            | MASCOT:(PepMatched Observed.Hits Coverage)                                                    |                              | 2               | 2                            | 21.6%                            |           |          |         |   |
|                                            | Seq                                                                                           | Charge                       | ObservedMS      | ExpectedMS                   | CalculatedMS                     |           | PepScore | PepHits |   |
|                                            | IEADSESQEDIIR                                                                                 | +2                           | 752.8610        | 1503.7075                    | 1503.7052                        | 0         | 88       | 4       |   |
|                                            | ELDALGHLPVLAPQWEGYDELQTDGNR                                                                   | +3                           |                 | 1055.8423                    | 3164.5050                        | 3164.5050 | 0        | 56      | 2 |

**Identified Human Platelet Proteins**

|              |                                                               |                                 |                      |                                   |                                       |                 |                |    |   |
|--------------|---------------------------------------------------------------|---------------------------------|----------------------|-----------------------------------|---------------------------------------|-----------------|----------------|----|---|
| <b>No.</b>   | <b>Protein</b>                                                | <b>Matched (SEQUEST MASCOT)</b> | <b>Strategy.Hits</b> | <b>PepMatched(SEQUEST MASCOT)</b> | <b>SpectraMatched(SEQUEST MASCOT)</b> |                 |                |    |   |
| 37.          | IPI00218728                                                   | N Y                             | 1                    | 0 2                               | 0 2                                   |                 |                |    |   |
| <b>*Des:</b> | Platelet-activating factor acetylhydrolase IB alpha subunit   |                                 |                      |                                   |                                       |                 |                |    |   |
|              | SEQUEST:(PepMatched Observed.Hits Coverage)                   |                                 |                      |                                   |                                       |                 |                |    |   |
|              | MASCOT:(PepMatched Observed.Hits Coverage) 2 1 7.21%          |                                 |                      |                                   |                                       |                 |                |    |   |
|              | <b>Seq</b>                                                    | <b>Charge</b>                   | <b>ObservedMS</b>    | <b>ExpectedMS</b>                 | <b>CalculatedMS</b>                   | <b>PepScore</b> | <b>PepHits</b> |    |   |
|              | VWDYETGDFER                                                   | +2                              | 708.8701             | 1415.7256                         | 1415.5993                             | 0.13            | 55             | 1  |   |
|              | LNEAKEEFTSGGPLGQK                                             | +3                              | 602.3561             | 1804.0465                         | 1803.9002                             | 0.15            | 55             | 1  |   |
|              |                                                               |                                 |                      |                                   |                                       |                 |                |    |   |
| <b>No.</b>   | <b>Protein</b>                                                | <b>Matched (SEQUEST MASCOT)</b> | <b>Strategy.Hits</b> | <b>PepMatched(SEQUEST MASCOT)</b> | <b>SpectraMatched(SEQUEST MASCOT)</b> |                 |                |    |   |
| 38.          | IPI00293126                                                   | Y N                             | 1                    | 2 0                               | 4 0                                   |                 |                |    |   |
| <b>*Des:</b> | Tubulin-specific chaperone B                                  |                                 |                      |                                   |                                       |                 |                |    |   |
|              | SEQUEST:(PepMatched Observed.Hits Coverage) 2 2 17.67%        |                                 |                      |                                   |                                       |                 |                |    |   |
|              | <b>Seq</b>                                                    | <b>Charge</b>                   | <b>Xcor</b>          | <b>Delta</b>                      | <b>Probability</b>                    | <b>PepHits</b>  |                |    |   |
|              | LDQEDALLGSYPVDDGCR                                            | +2                              |                      | 4.725                             | 0.531                                 | 0.9982          | 2              |    |   |
|              | YGAFVKPAVVTVGDFPEEDYGLDE                                      | +2                              |                      | 5.163                             | 0.542                                 | 0.9976          | 4              |    |   |
|              | MASCOT:(PepMatched Observed.Hits Coverage)                    |                                 |                      |                                   |                                       |                 |                |    |   |
|              |                                                               |                                 |                      |                                   |                                       |                 |                |    |   |
| <b>No.</b>   | <b>Protein</b>                                                | <b>Matched (SEQUEST MASCOT)</b> | <b>Strategy.Hits</b> | <b>PepMatched(SEQUEST MASCOT)</b> | <b>SpectraMatched(SEQUEST MASCOT)</b> |                 |                |    |   |
| 39.          | IPI00514395                                                   | N Y                             | 1                    | 0 2                               | 0 6                                   |                 |                |    |   |
| <b>*Des:</b> | GDP dissociation inhibitor 2                                  |                                 |                      |                                   |                                       |                 |                |    |   |
|              | SEQUEST:(PepMatched Observed.Hits Coverage)                   |                                 |                      |                                   |                                       |                 |                |    |   |
|              | MASCOT:(PepMatched Observed.Hits Coverage) 2 1 19.32%         |                                 |                      |                                   |                                       |                 |                |    |   |
|              | <b>Seq</b>                                                    | <b>Charge</b>                   | <b>ObservedMS</b>    | <b>ExpectedMS</b>                 | <b>CalculatedMS</b>                   | <b>PepScore</b> | <b>PepHits</b> |    |   |
|              | SPYLYPLYGLGELPQGFAR                                           | +2                              |                      | 1071.1394                         | 2140.2642                             | 2140.0992       | 0.16           | 46 | 3 |
|              | FDLGQDVIDFTGHALALYR                                           | +3                              |                      | 717.7577                          | 2150.2513                             | 2150.0796       | 0.17           | 61 | 3 |
|              |                                                               |                                 |                      |                                   |                                       |                 |                |    |   |
| <b>No.</b>   | <b>Protein</b>                                                | <b>Matched (SEQUEST MASCOT)</b> | <b>Strategy.Hits</b> | <b>PepMatched(SEQUEST MASCOT)</b> | <b>SpectraMatched(SEQUEST MASCOT)</b> |                 |                |    |   |
| 40.          | IPI00003865                                                   | Y Y                             | 1                    | 5 3                               | 6 7                                   |                 |                |    |   |
| <b>*Des:</b> | Splice Isoform 1 of Heat shock cognate 71 kDa protein         |                                 |                      |                                   |                                       |                 |                |    |   |
|              | SEQUEST:(PepMatched Observed.Hits Coverage) 5 1 12.63%        |                                 |                      |                                   |                                       |                 |                |    |   |
|              | <b>Seq</b>                                                    | <b>Charge</b>                   | <b>Xcor</b>          | <b>Delta</b>                      | <b>Probability</b>                    | <b>PepHits</b>  |                |    |   |
|              | SQIHDIIVLVGGSTR                                               | +2                              |                      | 3.437                             | 0.597                                 | 0.9972          | 2              |    |   |
|              | TTPSYVAFTDTER                                                 | +2                              |                      | 2.818                             | 0.533                                 | 0.9928          | 2              |    |   |
|              | NQVAMNPTNTVFDK                                                | +2                              |                      | 3.764                             | 0.528                                 | 0.9963          | 2              |    |   |
|              | DAGTIAGLNVLR                                                  | +2                              |                      | 3.929                             | 0.265                                 | 0.9777          | 2              |    |   |
|              | QTQTFTTYSNQPGLIQVYEGER                                        | +3                              |                      | 3.998                             | 0.399                                 | 0.9894          | 2              |    |   |
|              | MASCOT:(PepMatched Observed.Hits Coverage) 3 1 6.54%          |                                 |                      |                                   |                                       |                 |                |    |   |
|              | <b>Seq</b>                                                    | <b>Charge</b>                   | <b>ObservedMS</b>    | <b>ExpectedMS</b>                 | <b>CalculatedMS</b>                   | <b>PepScore</b> | <b>PepHits</b> |    |   |
|              | TTPSYVAFTDTER                                                 | +2                              | 744.3538             | 1486.6931                         | 1486.6940                             | 0               | 73             | 4  |   |
|              | NQVAMNPTNTVFDK                                                | +2                              |                      | 825.4031                          | 1648.7916                             | 1648.7879       | 0              | 66 | 2 |
|              | DAGTIAGLNVLR                                                  | +2                              | 600.3398             | 1198.6650                         | 1198.6669                             | 0               | 71             | 4  |   |
|              |                                                               |                                 |                      |                                   |                                       |                 |                |    |   |
| <b>No.</b>   | <b>Protein</b>                                                | <b>Matched (SEQUEST MASCOT)</b> | <b>Strategy.Hits</b> | <b>PepMatched(SEQUEST MASCOT)</b> | <b>SpectraMatched(SEQUEST MASCOT)</b> |                 |                |    |   |
| 41.          | IPI00216049                                                   | Y N                             | 1                    | 2 0                               | 5 0                                   |                 |                |    |   |
| <b>*Des:</b> | Splice Isoform 1 of Heterogeneous nuclear ribonucleoprotein K |                                 |                      |                                   |                                       |                 |                |    |   |

Identified Human Platelet Proteins

| No.   | Protein                                                | Matched (SEQUEST MASCOT) | Strategy   | Hits       | PepMatched (SEQUEST MASCOT)            | SpectraMatched (SEQUEST MASCOT) |
|-------|--------------------------------------------------------|--------------------------|------------|------------|----------------------------------------|---------------------------------|
| 42.   | IPI00411626                                            | N                        | Y          | 1          | 0                                      | 2                               |
| *Des: | Hypothetical protein DKFZp779N0926                     |                          |            |            |                                        |                                 |
|       | SEQUEST:(PepMatched Observed.Hits Coverage) 2 1 3.18%  |                          |            |            |                                        |                                 |
|       | MASCOT:(PepMatched Observed.Hits Coverage) 2 1 9.92%   |                          |            |            |                                        |                                 |
|       | Seq                                                    | Charge                   | Xcor       | Delta      | Proability                             | PepHits                         |
|       | RPAEDMEEEEQAFK                                         | +2                       |            | 3.793      | 0.716                                  | 1.0000 1                        |
|       | RPAEDMEEEEQAFKR                                        |                          | +3         | 5.647      | 0.642                                  | 1.0000 4                        |
|       | MASCOT:(PepMatched Observed.Hits Coverage) 2 1 9.92%   |                          |            |            |                                        |                                 |
|       | Seq                                                    | Charge                   | ObservedMS | ExpectedMS | CalculatedMS                           | PepScore PepHits                |
|       | YLQEIYNSNNQK                                           | +2                       | 757.3658   | 1512.7171  | 1512.7208 0 41 4                       |                                 |
|       | LTAYFAGGDAGDAFDGDFGDDPSDK                              | +2                       |            | 1417.5931  | 2833.1717 2833.1667 0                  | 115 64                          |
| 43.   | IPI00010720                                            | N                        | Y          | 1          | 0                                      | 4                               |
| *Des: | T-complex protein 1, epsilon subunit                   |                          |            |            |                                        |                                 |
|       | SEQUEST:(PepMatched Observed.Hits Coverage) 4 1 13.06% |                          |            |            |                                        |                                 |
|       | MASCOT:(PepMatched Observed.Hits Coverage) 4 1 13.06%  |                          |            |            |                                        |                                 |
|       | Seq                                                    | Charge                   | ObservedMS | ExpectedMS | CalculatedMS                           | PepScore PepHits                |
|       | QQISLATQMVR                                            | +2                       | 637.8723   | 1273.7300  | 1273.6812 0.05 47 1                    |                                 |
|       | EKFEEMIQQIK                                            | +2                       | 711.9130   | 1421.8114  | 1421.7224 0.09 45 1                    |                                 |
|       | LGFAGLVQEISFGTTK                                       | +2                       |            | 834.5065   | 1666.9984 1666.8929 0.11 38 1          |                                 |
|       | MMVDKGDVTVTNDGATILSMMDVDHQIAK                          |                          |            | +4         | 813.4366 3249.7173 3249.5025 0.21 57 1 |                                 |
| 44.   | IPI00013991                                            | N                        | Y          | 1          | 0                                      | 2                               |
| *Des: | Splice Isoform 1 of Tropomyosin beta chain             |                          |            |            |                                        |                                 |
|       | SEQUEST:(PepMatched Observed.Hits Coverage) 2 1 4.49%  |                          |            |            |                                        |                                 |
|       | MASCOT:(PepMatched Observed.Hits Coverage) 2 1 4.49%   |                          |            |            |                                        |                                 |
|       | Seq                                                    | Charge                   | ObservedMS | ExpectedMS | CalculatedMS                           | PepScore PepHits                |
|       | MELQEMQLK                                              | +2                       | 575.2853   | 1148.5560  | 1148.5569 0 50 15                      |                                 |
|       | MELQEMQLKEAK                                           | +2                       | 739.3721   | 1476.7297  | 1476.7316 0 60 5                       |                                 |
| 45.   | IPI00334410                                            | N                        | Y          | 1          | 0                                      | 2                               |
| *Des: | Splice Isoform 2 of Myosin XVIII A                     |                          |            |            |                                        |                                 |
|       | SEQUEST:(PepMatched Observed.Hits Coverage) 2 3 1.88%  |                          |            |            |                                        |                                 |
|       | MASCOT:(PepMatched Observed.Hits Coverage) 2 3 1.88%   |                          |            |            |                                        |                                 |
|       | Seq                                                    | Charge                   | ObservedMS | ExpectedMS | CalculatedMS                           | PepScore PepHits                |
|       | LEEDQEDMNELMK                                          | +2                       | 812.3468   | 1622.6791  | 1622.6803 0 52 8                       |                                 |
|       | AAEINGEVDDDDAGGEWR                                     | +2                       |            | 960.3996   | 1918.7846 1917.7976 0.99 58 8          |                                 |
| 46.   | IPI00297779                                            | Y                        | Y          | 2          | 3                                      | 5                               |
| *Des: | T-complex protein 1, beta subunit                      |                          |            |            |                                        |                                 |

Identified Human Platelet Proteins

| SEQUEST:(PepMatched Observed.Hits Coverage) |        | 3          | 1          | 10.86%       |           |                  |
|---------------------------------------------|--------|------------|------------|--------------|-----------|------------------|
| Seq                                         | Charge | Xcor       | Delta      | Proability   | PepHits   |                  |
| QVLLSAAEAAEVILR                             | +2     |            | 2.998      | 0.596        | 0.9929    | 2                |
| VQDDEVGDGTTSVTLAAELLR                       |        |            |            | +2           | 6.074     | 0.652 1.0000 4   |
| EGTIGDMAILGITESFQVK                         | +2     |            |            | 4.206        | 0.509     | 0.9944 2         |
| MASCOT:(PepMatched Observed.Hits Coverage)  |        | 5          | 2          | 16.57%       |           |                  |
| Seq                                         | Charge | ObservedMS | ExpectedMS | CalculatedMS |           | Pepscore PepHits |
| GATQQILDEAER                                | +2     | 665.8813   | 1329.7480  | 1329.6524    | 0.1       | 101 1            |
| QDLMNIAGTTLSSK                              | +2     | 739.9338   | 1477.8530  | 1477.7446    | 0.11      | 90 1             |
| LTSFIGAIAIGDLVK                             | +2     | 759.5079   | 1517.0012  | 1516.8864    | 0.11      | 51 1             |
| VQDDEVGDGTTSVTLAAELLR                       | +2     |            | 1144.6635  | 2287.3124    | 2287.1543 | 0.16 64 1        |
| MLPTIADNAGYDSADLVAQLR                       | +3     |            | 783.1286   | 2346.3640    | 2346.1889 | 0.18 72 2        |

No. 47. Protein IPI00003362 Matched (SEQUEST MASCOT) Y Y Strategy.Hits 1 PepMatched(SEQUEST MASCOT) 3 2 SpectraMatched(SEQUEST MASCOT) 35 24

\*Des: 78 kDa glucose-regulated protein precursor

| SEQUEST:(PepMatched Observed.Hits Coverage) |        | 3          | 7          | 8.57%        |           |                  |
|---------------------------------------------|--------|------------|------------|--------------|-----------|------------------|
| Seq                                         | Charge | Xcor       | Delta      | Proability   | PepHits   |                  |
| LYGSAGPPPTGEEDTAEKDE                        | +2     |            |            | 4.735        | 0.565     | 0.9590 6         |
| IEWLESHQDADIEDFK                            | +2     |            |            | 5.599        | 0.568     | 1.0000 6         |
| IEIESFYEGEDFSETLTR                          | +2     |            |            | 5.765        | 0.644     | 1.0000 11        |
| MASCOT:(PepMatched Observed.Hits Coverage)  |        | 2          | 5          | 5.41%        |           |                  |
| Seq                                         | Charge | ObservedMS | ExpectedMS | CalculatedMS |           | Pepscore PepHits |
| IEWLESHQDADIEDFK                            | +2     |            | 987.9602   | 1973.9059    | 1973.9007 | 0.01 76 2        |
| IEIESFYEGEDFSETLTR                          | +2     |            | 1083.0010  | 2163.9874    | 2163.9847 | 0 100 3          |

No. 48. Protein IPI00333541 Matched (SEQUEST MASCOT) Y Y Strategy.Hits 3 3 PepMatched(SEQUEST MASCOT) 58 18 SpectraMatched(SEQUEST MASCOT) 140

\*Des: Filamin A

| SEQUEST:(PepMatched Observed.Hits Coverage) |        | 3          | 1          | 1.93%        |         |                  |
|---------------------------------------------|--------|------------|------------|--------------|---------|------------------|
| Seq                                         | Charge | Xcor       | Delta      | Proability   | PepHits |                  |
| TGVAVNKPAEFTVDAK                            | +3     |            |            | 3.962        | 0.654   | 1.0000 22        |
| GPGLEKTGVAVNKPAEFTVDAK                      | +3     |            |            | 4.386        | 0.572   | 0.9993 4         |
| RLTVSSLQESGLKVNQPASFAVSLNGAK                | +3     |            |            | 5.667        | 0.606   | 1.0000 3         |
| MASCOT:(PepMatched Observed.Hits Coverage)  |        | 58         | 15         | 35.17%       |         |                  |
| Seq                                         | Charge | ObservedMS | ExpectedMS | CalculatedMS |         | Pepscore PepHits |
| KGEITGEVR                                   | +2     | 494.8136   | 987.6126   | 987.5349     | 0.08    | 38 7             |
| LSPFMADIR                                   | +2     | 525.2996   | 1048.5846  | 1048.5375    | 0.05    | 43 1             |
| LYSVSYLLK                                   | +2     | 543.3234   | 1084.6322  | 1084.6168    | 0.02    | 51 1             |
| GTVEPQLEAR                                  | +2     | 550.3345   | 1098.6544  | 1098.5669    | 0.09    | 50 3             |
| LDVQFSGGTK                                  | +2     | 554.3397   | 1106.6648  | 1106.5971    | 0.07    | 56 1             |
| ENGVYLIDVK                                  | +2     | 575.3491   | 1148.6836  | 1148.6077    | 0.08    | 38 1             |
| LIALLEVLSQK                                 | +2     | 613.9105   | 1225.8064  | 1225.7645    | 0.04    | 56 1             |
| LTVSSLQESGLK                                | +2     | 631.3951   | 1260.7756  | 1260.6925    | 0.08    | 81 3             |
| VTVLFAGQHIAK                                | +2     | 642.4095   | 1282.8044  | 1282.7397    | 0.06    | 43 4             |
| LPQLPITNFSR                                 | +2     | 643.3879   | 1284.7612  | 1284.7190    | 0.04    | 59 10            |
| YGGQPVNPFPSK                                | +2     | 645.8699   | 1289.7252  | 1289.6404    | 0.08    | 44 3             |



Identified Human Platelet Proteins

|                                  |    |           |           |           |           |      |     |    |   |
|----------------------------------|----|-----------|-----------|-----------|-----------|------|-----|----|---|
| GKLDVQFSGGTK                     | +2 | 646.9034  | 1291.7922 | 1291.7135 | 0.08      | 61   | 1   |    |   |
| FNGTHIPGSPFK                     | +2 | 651.3728  | 1300.7310 | 1300.6564 | 0.07      | 51   | 1   |    |   |
| YGGPYHIGGSPFK                    | +2 | 690.3677  | 1378.7208 | 1378.6669 | 0.05      | 76   | 3   |    |   |
| YGGDEIPFSPYR                     | +2 | 700.8439  | 1399.6732 | 1399.6408 | 0.03      | 46   | 1   |    |   |
| RLTVSSLQESGLK                    | +2 | 709.4404  | 1416.8662 | 1416.7936 | 0.07      | 79   | 2   |    |   |
| AGNNMLLVGVHGPR                   | +2 | 717.9251  | 1433.8356 | 1433.7561 | 0.08      | 75   | 75  | 3  |   |
| VNQPASFAVSLNGAK                  | +2 | 751.9246  | 1501.8346 | 1501.7888 | 0.05      | 65   | 65  | 1  |   |
| SPFSVAVSPSLDLSK                  | +2 | 767.4444  | 1532.8742 | 1532.8086 | 0.07      | 67   | 67  | 4  |   |
| YAPSEAGLHEMDIR                   | +2 | 794.9039  | 1587.7932 | 1587.7351 | 0.06      | 74   | 3   |    |   |
| TGVAVNKPAEFTVDAK                 | +2 | 823.9682  | 1645.9218 | 1645.8675 | 0.05      | 65   | 65  | 2  |   |
| VTYTPMAPGSYLISIK                 | +2 | 870.9822  | 1739.9498 | 1739.9167 | 0.03      | 57   | 57  | 1  |   |
| TFSVWYVPEVTGTHK                  | +2 | 875.9914  | 1749.9682 | 1749.8726 | 0.1       | 46   | 46  | 3  |   |
| DVDIIDHHDNTYTVK                  | +2 | 892.9694  | 1783.9242 | 1783.8377 | 0.09      | 60   | 3   |    |   |
| QMQLENVSVALEFLDR                 | +2 | 946.5435  | 1891.0724 | 1890.9509 | 0.12      | 74   | 74  | 1  |   |
| EGPYSISVLYGDEEVPR                | +2 | 955.4942  | 1908.9738 | 1908.9104 | 0.06      | 102  | 102 | 1  |   |
| HTAMVSWGGSIPNSPFR                | +2 | 972.0109  | 1942.0072 | 1941.9519 | 0.06      | 70   | 70  | 1  |   |
| IPEISIQDMTAQVTSPSGK              | +2 | 1001.5732 | 2001.1318 | 2001.0088 | 0.12      | 89   | 89  | 1  |   |
| YTPVQQGPVGVNVTYGGDPIPK           | +2 |           | 1143.6498 | 2285.2850 | 2285.1691 | 0.12 | 63  | 63 | 1 |
| SAGQGEVLVYVEDPAGHQEEAK           | +2 |           | 1157.1349 | 2312.2552 | 2312.0920 | 0.16 | 53  | 53 | 3 |
| ASGPGLNNTGVPASLPVEFTIDAK         | +2 |           | 1171.6572 | 2341.2998 | 2341.2165 | 0.08 | 48  | 48 | 1 |
| THIQDNHDGTYTVAYVPDVTGR           | +3 |           | 820.4514  | 2458.3324 | 2458.1513 | 0.18 | 45  | 45 | 3 |
| KTHIQDNHDGTYTVAYVPDVTGR          | +3 |           | 863.1407  | 2586.4003 | 2586.2462 | 0.15 | 48  | 48 | 3 |
| FGGEHVPNSPFQVTALAGDQPSVQPPLR     | +3 |           | 982.5574  | 2944.6504 | 2944.4831 | 0.17 | 39  | 39 | 4 |
| EEGPYEVEVTYDGVVPGSPFPLEAVAPTKPSK | +4 |           | 872.2524  | 3484.9805 | 3484.7289 | 0.25 | 50  | 50 | 2 |
| SPFEVYVDK                        | +2 | 542.3074  | 1082.6002 | 1082.5284 | 0.07      | 52   | 4   |    |   |
| AWGPGLEGGVVVK                    | +2 | 613.8491  | 1225.6836 | 1225.6454 | 0.04      | 68   | 5   |    |   |
| VEPGLGADNSVVR                    | +2 | 656.8918  | 1311.7690 | 1311.6782 | 0.09      | 63   | 5   |    |   |
| VDVGKDKQEFYVK                    | +2 | 682.9060  | 1363.7974 | 1363.6983 | 0.1       | 53   | 7   |    |   |
| IANLQTDLSDGRLR                   | +2 | 708.4300  | 1414.8454 | 1414.7416 | 0.1       | 86   | 22  |    |   |
| EAGAGGLAIAVEGPSK                 | +2 | 713.9216  | 1425.8286 | 1425.7463 | 0.08      | 73   | 73  | 6  |   |
| AFGPGQLQGSAGSPAR                 | +2 | 715.3859  | 1428.7572 | 1428.7109 | 0.05      | 87   | 87  | 6  |   |
| ANLPQSFQVDTSK                    | +2 | 717.9050  | 1433.7954 | 1433.7150 | 0.08      | 68   | 5   |    |   |
| GAGTGGLGLAVEGPSEAK               | +2 | 785.9226  | 1569.8306 | 1569.7997 | 0.03      | 77   | 77  | 5  |   |
| YNEQHVPGPSFTAR                   | +2 | 801.9156  | 1601.8166 | 1601.7586 | 0.06      | 49   | 3   |    |   |
| VTAQGPGLPSGNIANK                 | +2 | 826.9731  | 1651.9316 | 1651.8529 | 0.08      | 49   | 49  | 3  |   |
| TGVELGKPTHFTVNAK                 | +2 | 850.0016  | 1697.9886 | 1697.9100 | 0.08      | 81   | 81  | 6  |   |
| VANPSGNLTETYVQDR                 | +2 | 882.4611  | 1762.9076 | 1762.8485 | 0.06      | 93   | 93  | 3  |   |
| VAQPTITDNKDGTVTVR                | +2 | 908.0309  | 1814.0472 | 1813.9534 | 0.09      | 82   | 82  | 3  |   |
| DAGEGLLAVQITDPEGKPK              | +2 | 969.5429  | 1937.0712 | 1937.0105 | 0.06      | 87   | 87  | 3  |   |
| LVSNHSLHETSSVFVDSLTK             | +3 | 734.0903  | 2199.2491 | 2199.1171 | 0.13      | 70   | 70  | 13 |   |
| VSGQGLHEGHTFEPAEFIIDTR           | +3 | 814.1042  | 2439.2908 | 2439.1818 | 0.11      | 53   | 53  | 5  |   |
| NGQHVASSPIPVVISQSEIGDASR         | +3 |           | 816.8084  | 2447.4034 | 2447.2404 | 0.16 | 81  | 81 | 3 |
| FNEEHIPDSPFVVPVSPSGDAR           | +2 |           | 1234.1498 | 2466.2850 | 2466.1815 | 0.1  | 36  | 36 | 6 |
| GLVEPVDVVDNADGTQTVNYVPSR         | +3 |           | 848.8138  | 2543.4196 | 2543.2503 | 0.17 | 71  | 71 | 3 |
| VGSAADIPINISSETDLSLLTATVVPPSGR   | +2 |           | 1447.3308 | 2892.6470 | 2892.5443 | 0.1  | 50  | 50 | 8 |
| LLGWIQNK                         | +2 | 486.3145  | 970.6144  | 970.5600  | 0.05      | 41   | 25  |    |   |
| GQHVPGPSPFQFTVGPLGEGGAHK         | +4 |           | 576.8318  | 2303.2981 | 2303.1446 | 0.15 | 40  | 40 | 9 |

Identified Human Platelet Proteins

No. Protein Matched (SEQUEST MASCOT) Strategy.Hits PepMatched(SEQUEST MASCOT) SpectraMatched(SEQUEST MASCOT)  
 49. IPI00019376 N Y 1 0 6 0 6

\*Des: Septin-11

SEQUEST:(PepMatched Observed.Hits Coverage)

MASCOT:(PepMatched Observed.Hits Coverage)

| Seq                  | Charge | ObservedMS | ExpectedMS | CalculatedMS   | PepScore | PepHits |
|----------------------|--------|------------|------------|----------------|----------|---------|
| VNIIPIIAK            | +2     | 490.8558   | 979.6970   | 979.6430 0.05  | 34       | 5       |
| SYELQESNVR           | +2     | 612.8442   | 1223.6738  | 1223.5782 0.1  | 38       | 1       |
| STLMDTLFNTK          | +2     | 635.8549   | 1269.6952  | 1269.6275 0.07 | 36       | 1       |
| ELEEEVNNFQK          | +2     | 689.8851   | 1377.7556  | 1377.6412 0.11 | 61       | 1       |
| AAAQLLQSQAQQSGAQQTK  | +3     | 653.0569   | 1956.1489  | 1956.0024 0.15 | 41       | 1       |
| KAAAQLLQSQAQQSGAQQTK | +3     | 695.7579   | 2084.2519  | 2084.0974 0.15 | 73       | 1       |

No. Protein Matched (SEQUEST MASCOT) Strategy.Hits PepMatched(SEQUEST MASCOT) SpectraMatched(SEQUEST MASCOT)  
 50. IPI00328867 N Y 1 0 12 0 28

\*Des: OTTHUMP00000030925

SEQUEST:(PepMatched Observed.Hits Coverage)

MASCOT:(PepMatched Observed.Hits Coverage)

| Seq                  | Charge | ObservedMS | ExpectedMS | CalculatedMS   | PepScore | PepHits |
|----------------------|--------|------------|------------|----------------|----------|---------|
| LLLNAENPR            | +2     | 520.3256   | 1038.6366  | 1038.5822 0.05 | 34       | 3       |
| LDSGGFYITSR          | +2     | 608.3485   | 1214.6824  | 1214.5931 0.09 | 63       | 1       |
| WTAPEAALYGR          | +2     | 617.8377   | 1233.6608  | 1233.6142 0.05 | 55       | 1       |
| KLDSGGFYITSR         | +2     | 672.3845   | 1342.7544  | 1342.6881 0.07 | 59       | 1       |
| LFGGFNSSDVTSPQR      | +2     | 856.9521   | 1711.8896  | 1711.8165 0.07 | 103      | 1       |
| TQFNLSLQQLVAYYSK     | +2     | 895.5057   | 1788.9968  | 1788.9046 0.09 | 84       | 1       |
| AGPLAGGVTTFVALYDYESR | +2     | 1044.0920  | 2086.1694  | 2086.0370 0.13 | 46       | 1       |
| TLKPGTMSPEAFLQEAQVMK | +3     | 736.0872   | 2205.2398  | 2205.1173 0.12 | 53       | 3       |
| GPSAAFAPAAAEPK       | +2     | 642.8750   | 1283.7354  | 1283.6509 0.08 | 60       | 3       |
| LPQLVDMAAQIASGMAYVER | +2     | 1082.1274  | 2162.2402  | 2162.0863 0.15 | 63       | 3       |
| VPYPGMVNR            | +2     | 516.7967   | 1031.5788  | 1031.5222 0.06 | 40       | 5       |
| LIEDNEYTAR           | +2     | 612.3369   | 1222.6592  | 1222.5829 0.08 | 50       | 9       |

No. Protein Matched (SEQUEST MASCOT) Strategy.Hits PepMatched(SEQUEST MASCOT) SpectraMatched(SEQUEST MASCOT)  
 51. IPI00220503 Y Y 2 2 3 4 9

\*Des: Dynactin subunit 2

SEQUEST:(PepMatched Observed.Hits Coverage)

MASCOT:(PepMatched Observed.Hits Coverage)

| Seq                | Charge | Xcor  | Delta | Probility | PepHits | PepScore | PepHits |
|--------------------|--------|-------|-------|-----------|---------|----------|---------|
| ENLATVEGNFASIDER   | +2     | 4.363 | 0.630 | 0.9978    | 2       | 90       | 2       |
| TGYESGEYEMLGEGLGVK | +2     | 3.869 | 0.586 | 0.9967    | 2       | 41       | 2       |

  

| Seq                                          | Charge | ObservedMS | ExpectedMS | CalculatedMS   | PepScore | PepHits |
|----------------------------------------------|--------|------------|------------|----------------|----------|---------|
| ENLATVEGNFASIDER                             | +2     | 882.9231   | 1763.8316  | 1763.8325 0    | 90       | 2       |
| TGYESGEYEMLGEGLGVK                           | +2     | 959.9425   | 1917.8705  | 1917.8665 0    | 41       | 2       |
| NEPDVYETSDDLPEDDQAEFDAEELTSTSV EHIIVNPNAAYDK | +3     | 1570.7078  | 4709.1015  | 4709.0939 0.01 | 137      | 5       |

No. Protein Matched (SEQUEST MASCOT) Strategy.Hits PepMatched(SEQUEST MASCOT) SpectraMatched(SEQUEST MASCOT)

Identified Human Platelet Proteins

|       |                                                                  |                          |               |                            |                                |           |       |                  |
|-------|------------------------------------------------------------------|--------------------------|---------------|----------------------------|--------------------------------|-----------|-------|------------------|
| 52.   | IPI00554752                                                      | N                        | Y             | 1                          | 0                              | 3         | 0     | 6                |
| *Des: | cAMP-dependent protein kinase type II-beta regulatory subunit    |                          |               |                            |                                |           |       |                  |
|       | SEQUEST:(PepMatched Observed.Hits Coverage)                      |                          |               |                            |                                |           |       |                  |
|       | MASCOT:(PepMatched Observed.Hits Coverage)                       |                          |               |                            |                                |           |       |                  |
|       | Seq                                                              | Charge                   | ObservedMS    | ExpectedMS                 | CalculatedMS                   |           |       | Pepscore PepHits |
|       | MYESFIESLPFLK                                                    | +2                       | 802.4665      | 1602.9184                  | 1602.8003                      | 0.12      | 53    | 2                |
|       | GQYFGELALVTNKPR                                                  | +2                       |               | 847.0128                   | 1692.0110                      | 1691.8994 | 0.11  | 56               |
|       | NLDPEQMSQVLDAMFEK                                                | +2                       |               | 998.0392                   | 1994.0638                      | 1993.9125 | 0.15  | 46               |
|       |                                                                  |                          |               |                            |                                |           |       | 2                |
|       |                                                                  |                          |               |                            |                                |           |       | 2                |
| No.   | Protein                                                          | Matched (SEQUENT MASCOT) | Strategy.Hits | PepMatched(SEQUENT MASCOT) | SpectraMatched(SEQUENT MASCOT) |           |       |                  |
| 53.   | IPI00005614                                                      | Y                        | Y             | 1                          | 3                              | 3         | 6     | 18               |
| *Des: | Splice Isoform Long of Spectrin beta chain, brain 1              |                          |               |                            |                                |           |       |                  |
|       | SEQUEST:(PepMatched Observed.Hits Coverage)                      |                          |               |                            |                                |           |       |                  |
|       | Seq                                                              | Charge                   | Xcor          | Delta                      | Probility                      | PepHits   |       |                  |
|       | EVDDLEQWIAER                                                     | +2                       |               | 3.221                      | 0.491                          | 0.9939    |       | 2                |
|       | DVEDEILWVGER                                                     | +2                       |               | 3.176                      | 0.488                          | 0.9935    |       | 2                |
|       | DGLNEAWADLLELIDTR                                                | +2                       |               | 4.782                      | 0.589                          | 0.9985    |       | 2                |
|       | MASCOT:(PepMatched Observed.Hits Coverage)                       |                          |               |                            |                                |           |       |                  |
|       | Seq                                                              | Charge                   | ObservedMS    | ExpectedMS                 | CalculatedMS                   |           |       | Pepscore PepHits |
|       | DVEDEILWVGER                                                     | +2                       | 730.3571      | 1458.6996                  | 1458.6990                      | 0         | 75    | 6                |
|       | EVDDLEQWIAER                                                     | +2                       | 751.8594      | 1501.7043                  | 1501.7048                      | 0         | 59    | 6                |
|       | DGLNEAWADLLELIDTR                                                | +2                       |               | 972.4927                   | 1942.9709                      | 1942.9636 | 0.01  | 72               |
|       |                                                                  |                          |               |                            |                                |           |       | 6                |
| No.   | Protein                                                          | Matched (SEQUENT MASCOT) | Strategy.Hits | PepMatched(SEQUENT MASCOT) | SpectraMatched(SEQUENT MASCOT) |           |       |                  |
| 54.   | IPI00412792                                                      | Y                        | N             | 1                          | 2                              | 0         | 4     | 0                |
| *Des: | Hypothetical protein FLJ14844                                    |                          |               |                            |                                |           |       |                  |
|       | SEQUEST:(PepMatched Observed.Hits Coverage)                      |                          |               |                            |                                |           |       |                  |
|       | Seq                                                              | Charge                   | Xcor          | Delta                      | Probility                      | PepHits   |       |                  |
|       | APKPEDIDEEDDDVPDLVENFDEASKNEA                                    | +3                       |               |                            |                                | 5.324     | 0.411 | 0.9817           |
|       | APKPEDIDEEDDDVPDLVENFDEASK                                       | +3                       |               |                            |                                | 4.464     | 0.313 | 0.9931           |
|       | MASCOT:(PepMatched Observed.Hits Coverage)                       |                          |               |                            |                                |           |       |                  |
| No.   | Protein                                                          | Matched (SEQUENT MASCOT) | Strategy.Hits | PepMatched(SEQUENT MASCOT) | SpectraMatched(SEQUENT MASCOT) |           |       |                  |
| 55.   | IPI00021728                                                      | N                        | Y             | 1                          | 0                              | 2         | 0     | 2                |
| *Des: | Eukaryotic translation initiation factor 2 subunit 2             |                          |               |                            |                                |           |       |                  |
|       | SEQUEST:(PepMatched Observed.Hits Coverage)                      |                          |               |                            |                                |           |       |                  |
|       | MASCOT:(PepMatched Observed.Hits Coverage)                       |                          |               |                            |                                |           |       |                  |
|       | Seq                                                              | Charge                   | ObservedMS    | ExpectedMS                 | CalculatedMS                   |           |       | Pepscore PepHits |
|       | DASDDLDDLNFFNQK                                                  | +2                       |               | 878.8882                   | 1755.7618                      | 1755.7587 | 0     | 84               |
|       | EVEPEPTEDKDLEADEEDTR                                             | +3                       |               | 782.6746                   | 2345.0019                      | 2345.0030 | 0     | 46               |
|       |                                                                  |                          |               |                            |                                |           |       | 3                |
| No.   | Protein                                                          | Matched (SEQUENT MASCOT) | Strategy.Hits | PepMatched(SEQUENT MASCOT) | SpectraMatched(SEQUENT MASCOT) |           |       |                  |
| 56.   | IPI00066374                                                      | Y                        | Y             | 2                          | 4                              | 3         | 9     | 44               |
| *Des: | Smooth muScle and non-muScle myoSin alkali light chain iSoform 4 |                          |               |                            |                                |           |       |                  |
|       | SEQUEST:(PepMatched Observed.Hits Coverage)                      |                          |               |                            |                                |           |       |                  |
|       | Seq                                                              | Charge                   | Xcor          | Delta                      | Probility                      | PepHits   |       |                  |
|       | DQGTIEDYVEGLR                                                    | +2                       |               | 4.253                      | 0.570                          | 0.9897    |       | 4                |

Identified Human Platelet Proteins

|         |                                                  |                            |            |            |                               |                                    |          |         |
|---------|--------------------------------------------------|----------------------------|------------|------------|-------------------------------|------------------------------------|----------|---------|
|         | MTEEEVEMLVAGHEDSNGCINYEAFVR                      | +3                         | 4.028      | 0.324      | 0.9771                        | 1                                  |          |         |
|         | HVLVTLGEK                                        | +2                         | 3.093      | 0.479      | 0.9818                        | 8                                  |          |         |
|         | NKDQGTIEDYVEGLR                                  | +3                         | 4.130      | 0.557      | 1.0000                        | 4                                  |          |         |
|         | MASCOT:(PepMatched Observed.Hits Coverage)       | 3                          | 1          | 38.13%     |                               |                                    |          |         |
|         | Seq                                              | Charge                     | ObservedMS | ExpectedMS | CalculatedMS                  |                                    | PepScore | PepHits |
|         | ALGQNPTNAEVLK                                    | +2                         | 677.8709   | 1353.7271  | 1353.7252                     | 0                                  | 55       | 16      |
|         | VLDFEHFLPMLQTVAK                                 | +2                         | 944.5101   | 1887.0057  | 1886.9964                     | 0.01                               | 76       | 48      |
|         | VLGNPKSDEMNVK                                    | +2                         | 715.8688   | 1429.7231  | 1429.7235                     | 0                                  | 60       | 4       |
| No. 57. | Protein IPI00395750                              | Matched (SEQUEST MASCOT) N | Strategy Y | Hits 1     | PepMatched (SEQUEST MASCOT) 0 | SpectraMatched (SEQUEST MASCOT) 7  | 0        | 24      |
| *Des:   | WD repeat-containing protein 1 isoform 1 variant |                            |            |            |                               |                                    |          |         |
|         | SEQUEST:(PepMatched Observed.Hits Coverage)      |                            |            |            |                               |                                    |          |         |
|         | MASCOT:(PepMatched Observed.Hits Coverage)       | 7                          | 1          | 18.63%     |                               |                                    |          |         |
|         | Seq                                              | Charge                     | ObservedMS | ExpectedMS | CalculatedMS                  |                                    | PepScore | PepHits |
|         | LYSILGTTLK                                       | +2                         | 554.8643   | 1107.7140  | 1107.6539                     | 0.06                               | 63       | 2       |
|         | VFASLPQVER                                       | +2                         | 573.3471   | 1144.6796  | 1144.6240                     | 0.06                               | 39       | 4       |
|         | LYSILGTTLKDEGK                                   | +2                         | 769.4553   | 1536.8960  | 1536.8399                     | 0.06                               | 80       | 8       |
|         | YAPSGFYIASGDVSGK                                 | +2                         | 809.9452   | 1617.8758  | 1617.7674                     | 0.11                               | 64       | 6       |
|         | FGAVFLWDSGSSVGEITGHNK                            | +3                         | 736.7441   | 2207.2105  | 2207.0646                     | 0.15                               | 55       | 4       |
|         | VVTVFSVADGYSENNVFGHHAK                           | +3                         | 847.4620   | 2539.3642  | 2539.2131                     | 0.15                               | 61       | 2       |
|         | AHDGGIYAIWSPDSTHLLSASGDK                         | +4                         | 647.0994   | 2584.3685  | 2584.2193                     | 0.15                               | 77       | 6       |
| No. 58. | Protein IPI00010154                              | Matched (SEQUEST MASCOT) N | Strategy Y | Hits 1     | PepMatched (SEQUEST MASCOT) 0 | SpectraMatched (SEQUEST MASCOT) 10 | 0        | 12      |
| *Des:   | Rab GDP dissociation inhibitor alpha             |                            |            |            |                               |                                    |          |         |
|         | SEQUEST:(PepMatched Observed.Hits Coverage)      |                            |            |            |                               |                                    |          |         |
|         | MASCOT:(PepMatched Observed.Hits Coverage)       | 10                         | 1          | 35.82%     |                               |                                    |          |         |
|         | Seq                                              | Charge                     | ObservedMS | ExpectedMS | CalculatedMS                  |                                    | PepScore | PepHits |
|         | FLMANGQLVK                                       | +2                         | 560.8463   | 1119.6780  | 1119.6110                     | 0.07                               | 36       | 1       |
|         | MLLYTEVTR                                        | +2                         | 563.3362   | 1124.6578  | 1124.5900                     | 0.07                               | 42       | 2       |
|         | MAGTAFDFENMK                                     | +2                         | 681.3409   | 1360.6672  | 1360.5791                     | 0.09                               | 68       | 1       |
|         | FQLLEGPPESMGR                                    | +2                         | 730.8973   | 1459.7800  | 1459.7129                     | 0.07                               | 58       | 1       |
|         | TFEGVDPQTSMR                                     | +2                         | 734.8853   | 1467.7560  | 1467.6664                     | 0.09                               | 57       | 1       |
|         | EVEPALELLEPIDQK                                  | +2                         | 862.0103   | 1722.0060  | 1721.9087                     | 0.1                                | 46       | 1       |
|         | VPSTETEALASNLGMFEEK                              | +2                         | 1028.0416  | 2054.0686  | 2053.9700                     | 0.1                                | 84       | 2       |
|         | SPYLYPLYGLGELPQGFAR                              | +2                         | 1071.1042  | 2140.1938  | 2140.0992                     | 0.09                               | 44       | 2       |
|         | NPYYGGESSITPLEELYK                               | +2                         | 1074.0741  | 2146.1336  | 2146.0106                     | 0.12                               | 36       | 1       |
|         | LSAIYGGTYMLNKPVDDIIMENGK                         | +3                         | 881.4998   | 2641.4776  | 2641.3131                     | 0.16                               | 34       | 1       |
| No. 59. | Protein IPI00396557                              | Matched (SEQUEST MASCOT) N | Strategy Y | Hits 1     | PepMatched (SEQUEST MASCOT) 0 | SpectraMatched (SEQUEST MASCOT) 2  | 0        | 8       |
| *Des:   | ZYX protein                                      |                            |            |            |                               |                                    |          |         |
|         | SEQUEST:(PepMatched Observed.Hits Coverage)      |                            |            |            |                               |                                    |          |         |
|         | MASCOT:(PepMatched Observed.Hits Coverage)       | 2                          | 1          | 7.26%      |                               |                                    |          |         |
|         | Seq                                              | Charge                     | ObservedMS | ExpectedMS | CalculatedMS                  |                                    | PepScore | PepHits |
|         | VSSIDLEIDSLSSLLDDMTK                             | +2                         | 1091.0448  | 2180.0750  | 2180.0770                     | 0                                  | 67       | 2       |

Identified Human Platelet Proteins

EVEELEQLTQQLMQDMEHPQR +3 871.0762 2610.2069 2610.2054 0 80 7

No. Protein Matched (SEQUEST MASCOT) Strategy.Hits PepMatched(SEQUEST MASCOT) SpectraMatched(SEQUEST MASCOT)  
 60. IPI0008453 N Y 1 0 2 0 4  
 \*Des: Coronin-1C  
 SEQUEST:(PepMatched Observed.Hits Coverage) 2 1 6.63%  
 MASCOT:(PepMatched Observed.Hits Coverage) 2 1 6.63%  
 Seq Charge ObservedMS ExpectedMS CalculatedMS Pepscore PepHits  
 NADPILISLK +2 542.3564 1082.6982 1082.6335 0.06 34 4  
 YFEITDESPYVHYLNTFSSK +2 1220.6244 2439.2342 2439.1270 0.11 60 4

No. Protein Matched (SEQUEST MASCOT) Strategy.Hits PepMatched(SEQUEST MASCOT) SpectraMatched(SEQUEST MASCOT)  
 61. IPI00071059 Y Y 1 2 2 9 33  
 \*Des: Bax epsilon  
 SEQUEST:(PepMatched Observed.Hits Coverage) 2 1 16.16%  
 Seq Charge Xcor Delta Probility PepHits  
 VAADMFS DGNFNWGR +2 3.459 0.667 1.0000 1  
 VVALFYFASK +2 3.617 0.626 1.0000 13  
 MASCOT:(PepMatched Observed.Hits Coverage) 2 1 16.16%  
 Seq Charge ObservedMS ExpectedMS CalculatedMS Pepscore PepHits  
 VVALFYFASK +2 572.8236 1143.6327 1143.6328 0 65 35  
 VAADMFS DGNFNWGR +2 843.8716 1685.7287 1685.7256 0 42 5

No. Protein Matched (SEQUEST MASCOT) Strategy.Hits PepMatched(SEQUEST MASCOT) SpectraMatched(SEQUEST MASCOT)  
 62. IPI00465315 Y Y 1 2 2 14 19  
 \*Des: Cytochrome c  
 SEQUEST:(PepMatched Observed.Hits Coverage) 2 1 12.26%  
 Seq Charge Xcor Delta Probility PepHits  
 TGNLHGLFGR +2 3.689 0.583 1.0000 22  
 TGNLHGLFGRK +2 2.914 0.491 0.9768 10  
 MASCOT:(PepMatched Observed.Hits Coverage) 2 1 12.26%  
 Seq Charge ObservedMS ExpectedMS CalculatedMS Pepscore PepHits  
 TGNLHGLFGR +2 584.1980 1166.3814 1167.6148 -1.22 78 29  
 TGNLHGLFGRK +2 648.8621 1295.7097 1295.7098 0 44 8

No. Protein Matched (SEQUEST MASCOT) Strategy.Hits PepMatched(SEQUEST MASCOT) SpectraMatched(SEQUEST MASCOT)  
 63. IPI00301936 Y Y 1 4 4 12 12  
 \*Des: ELAV-like protein 1  
 SEQUEST:(PepMatched Observed.Hits Coverage) 4 1 21.38%  
 Seq Charge Xcor Delta Probility PepHits  
 SEAEAAITSFNGHKPPGSSEPITVK +3 4.492 0.599 0.9993 4  
 NVALLSQLYHSPAR +2 4.305 0.599 1.0000 5  
 VAGHSLGYGFVNYVTAK +2 4.331 0.544 0.9892 5  
 FGGPVHHQAQR +2 3.659 0.556 0.9891 3  
 MASCOT:(PepMatched Observed.Hits Coverage) 4 1 21.38%  
 Seq Charge ObservedMS ExpectedMS CalculatedMS Pepscore PepHits  
 FGGPVHHQAQR +2 617.3147 1232.6148 1232.6162 0 46 4

Identified Human Platelet Proteins

|                              |          |           |           |           |    |    |   |  |
|------------------------------|----------|-----------|-----------|-----------|----|----|---|--|
| NVALLSQLYHSPAR +2            | 784.9296 | 1567.8447 | 1567.8470 | 0         | 81 | 5  |   |  |
| VAGHSLGYGFVNYVTAK +2         |          | 891.9645  | 1781.9144 | 1781.9100 | 0  | 50 | 4 |  |
| SEAEEAITSFNGHKPPGSSEPITVK +3 |          | 871.4339  | 2611.2799 | 2611.2765 | 0  | 65 | 4 |  |

|         |                                             |                              |                 |                                |                                   |          |         |  |  |
|---------|---------------------------------------------|------------------------------|-----------------|--------------------------------|-----------------------------------|----------|---------|--|--|
| No. 64. | Protein IPI00302592                         | Matched (SEQUEST MASCOT) Y Y | Strategy.Hits 2 | PepMatched (SEQUEST MASCOT) 17 | SpectraMatched (SEQUEST MASCOT) 7 | 53       | 17      |  |  |
| *Des:   | FLJ00343 protein                            |                              |                 |                                |                                   |          |         |  |  |
|         | SEQUEST:(PepMatched Observed.Hits Coverage) |                              | 17              | 13                             | 10.27%                            |          |         |  |  |
|         | Seq Charge Xcor Delta                       | Proability                   | PepHits         |                                |                                   |          |         |  |  |
|         | VKAFGPGGLQGG SAGSPAR +2                     | 3.062                        | 0.603           | 0.9754                         | 4                                 |          |         |  |  |
|         | GLGLSKAYVGQK +3                             | 3.131                        | 0.602           | 0.9993                         | 5                                 |          |         |  |  |
|         | AYGPGIEPTGNMVKK +3                          | 1.927                        | 0.585           | 0.9933                         | 4                                 |          |         |  |  |
|         | YNEQHVPGPSFTAR +3                           | 3.529                        | 0.425           | 0.9930                         | 3                                 |          |         |  |  |
|         | EATTEFSVDAR +2                              | 3.031                        | 0.533           | 0.9840                         | 7                                 |          |         |  |  |
|         | AYGPGIEPTGNMVK +2                           | 3.160                        | 0.575           | 0.9857                         | 8                                 |          |         |  |  |
|         | VANPSGNLTETYVQDR +2                         | 4.058                        | 0.653           | 1.0000                         | 3                                 |          |         |  |  |
|         | GAGTGGLGLAVEGPSEAK +2                       | 4.893                        | 0.581           | 1.0000                         | 10                                |          |         |  |  |
|         | VRAWGPGLEGGVVGK +2                          | 4.052                        | 0.517           | 0.9771                         | 1                                 |          |         |  |  |
|         | LVSNHSLHETSSVFVDSLTK +3                     | 3.432                        | 0.484           | 0.9949                         | 2                                 |          |         |  |  |
|         | ANLPQSFQVDTSKAGVAPLQVK +2                   | 5.795                        | 0.647           | 1.0000                         | 6                                 |          |         |  |  |
|         | AGGPGLERAEAGVPAEFSIWTR +2                   | 5.337                        | 0.563           | 1.0000                         | 10                                |          |         |  |  |
|         | LLGWIQNKLPQLPITNFSRDWQSGR +3                | 4.030                        | 0.456           | 0.9958                         | 5                                 |          |         |  |  |
|         | ALTQTGGPHVKAR +2                            | 3.799                        | 0.631           | 1.0000                         | 11                                |          |         |  |  |
|         | AGQSAAGAAPGGGVDR +2                         | 3.791                        | 0.684           | 1.0000                         | 2                                 |          |         |  |  |
|         | ALTQTGGPHVK +2                              | 3.172                        | 0.465           | 0.9794                         | 8                                 |          |         |  |  |
|         | NGQHVASSPIPVVISQSEIGDASR +3                 | 3.567                        | 0.633           | 0.9991                         | 1                                 |          |         |  |  |
|         | MASCOT:(PepMatched Observed.Hits Coverage)  |                              | 7               | 2                              | 5.78%                             |          |         |  |  |
|         | Seq Charge ObservedMS                       | ExpectedMS                   | CalculatedMS    |                                |                                   | PepScore | PepHits |  |  |
|         | DAGEGGLSLAIEGPSK +2                         | 750.8847                     | 1499.7549       | 1499.7467                      | 0.01                              | 62       | 1       |  |  |
|         | VDINTEDLEDGTCR +2                           | 790.3481                     | 1578.6816       | 1578.6831                      | 0                                 | 57       | 2       |  |  |
|         | EGPYSISVLYGDEEVPR +2                        | 955.4624                     | 1908.9103       | 1908.9104                      | 0                                 | 45       | 3       |  |  |
|         | DGSCGVAYVVQEPGDYEVSVK +2                    | 1101.0087                    | 2200.0028       | 2199.9993                      | 0                                 | 59       | 5       |  |  |
|         | SADFVVEAIGDDVGTGLGFSVEGPSQAK +2             | 1348.1641                    | 2694.3136       | 2694.3023                      | 0.01                              | 89       | 4       |  |  |
|         | DAGYGGLSLSIEGPSKVDINTEDLEDGTCR +3           | 1037.8212                    | 3110.4417       | 3110.4349                      | 0.01                              | 68       | 2       |  |  |
|         | VEYTPYEGLHSVDVTYDGSPVPSSPFQVPVTEGCDPSR +3   | 1413.9785                    | 4238.9137       | 4238.9265                      | 0                                 | 90       | 4       |  |  |

|         |                                             |                              |                 |                               |                                    |          |         |  |  |
|---------|---------------------------------------------|------------------------------|-----------------|-------------------------------|------------------------------------|----------|---------|--|--|
| No. 65. | Protein IPI00465248                         | Matched (SEQUEST MASCOT) Y Y | Strategy.Hits 3 | PepMatched (SEQUEST MASCOT) 2 | SpectraMatched (SEQUEST MASCOT) 10 | 12       | 37      |  |  |
| *Des:   | Alpha enolase                               |                              |                 |                               |                                    |          |         |  |  |
|         | SEQUEST:(PepMatched Observed.Hits Coverage) |                              | 2               | 5                             | 9.29%                              |          |         |  |  |
|         | Seq Charge Xcor Delta                       | Proability                   | PepHits         |                               |                                    |          |         |  |  |
|         | VVIGMDVAASEFFR +2                           | 3.357                        | 0.599           | 0.9836                        | 1                                  |          |         |  |  |
|         | SFIKDYPVVSIEDPFDQDDWGAWQK +3                | 7.555                        | 0.509           | 1.0000                        | 10                                 |          |         |  |  |
|         | MASCOT:(PepMatched Observed.Hits Coverage)  |                              | 10              | 10                            | 34.69%                             |          |         |  |  |
|         | Seq Charge ObservedMS                       | ExpectedMS                   | CalculatedMS    |                               |                                    | PepScore | PepHits |  |  |
|         | GNPTVEVDLFTSK +2                            | 703.8612                     | 1405.7079       | 1405.7089                     | 0                                  | 61       | 2       |  |  |
|         | YISPDQLADLYK +2                             | 713.3663                     | 1424.7181       | 1424.7187                     | 0                                  | 63       | 2       |  |  |

Identified Human Platelet Proteins

|                               |           |           |           |      |    |    |  |  |
|-------------------------------|-----------|-----------|-----------|------|----|----|--|--|
| VVIGMDVAASEFFR +2             | 770.8932  | 1539.7718 | 1539.7755 | 0    | 44 | 1  |  |  |
| VNIGSVTESLQACK +2             | 788.9034  | 1575.7923 | 1575.7926 | 0    | 41 | 2  |  |  |
| AAVPSGASTGIYEALRLR +2         | 902.9775  | 1803.9404 | 1803.9366 | 0    | 69 | 4  |  |  |
| DATNVGDEGGFAPNILENK +2        | 980.9659  | 1959.9172 | 1959.9173 | 0    | 89 | 2  |  |  |
| DYPVVSIEDPFDQDDWGAWQK +2      | 1255.5612 | 2509.1078 | 2509.1073 | 0    | 96 | 6  |  |  |
| DATNVGDEGGFAPNILENKEGLELLK +3 | 915.1329  | 2742.3768 | 2742.3711 | 0.01 | 95 | 2  |  |  |
| SFIKDYPVVSIEDPFDQDDWGAWQK +3  | 995.8039  | 2984.3899 | 2984.3868 | 0    | 93 | 10 |  |  |
| SGETEDTFIADLVVGLCTGQIK +2     | 1148.5748 | 2295.1351 | 2295.1304 | 0    | 99 | 10 |  |  |

No. 66. Protein IPI00032220 Matched (SEQUEST MASCOT) Strategy.Hits PepMatched(SEQUEST MASCOT) SpectraMatched(SEQUEST MASCOT)  
 \*Des: Angiotensinogen precursor

|                                             |        |            |            |              |      |        |                  |
|---------------------------------------------|--------|------------|------------|--------------|------|--------|------------------|
| Matched (SEQUEST MASCOT)                    | N      | Y          | 1          | 0            | 4    | 0      | 4                |
| SEQUEST:(PepMatched Observed.Hits Coverage) |        |            |            |              |      |        |                  |
| MASCOT:(PepMatched Observed.Hits Coverage)  |        |            | 4          | 1            |      | 12.95% |                  |
| Seq                                         | Charge | ObservedMS | ExpectedMS | CalculatedMS |      |        | PepScore PepHits |
| ALQDQLVLVAAK                                | +2     | 634.9178   | 1267.8210  | 1267.7499    | 0.07 | 68     | 1                |
| AAMVGMLANFLGFR                              | +2     | 749.4444   | 1496.8742  | 1496.7631    | 0.11 | 96     | 1                |
| VLSALQAVQGLLVAQGR                           | +2     | 862.0624   | 1722.1102  | 1722.0151    | 0.1  | 70     | 1                |
| QPFVQGLALYTPVVLPR                           | +2     | 949.6038   | 1897.1930  | 1897.0825    | 0.11 | 50     | 1                |

No. 67. Protein IPI00472102 Matched (SEQUEST MASCOT) Strategy.Hits PepMatched(SEQUEST MASCOT) SpectraMatched(SEQUEST MASCOT)  
 \*Des: 60 kDa heat shock protein, mitochondrial precursor

|                                             |        |            |            |              |         |        |                  |
|---------------------------------------------|--------|------------|------------|--------------|---------|--------|------------------|
| Matched (SEQUEST MASCOT)                    | Y      | Y          | 2          | 2            | 8       | 3      | 10               |
| SEQUEST:(PepMatched Observed.Hits Coverage) |        |            | 2          | 2            |         | 7.86%  |                  |
| Seq                                         | Charge | Xcor       | Delta      | Proability   | PepHits |        |                  |
| DMAIATGGAVFGEEGLTLNLEDVQPHDLGK              |        |            |            |              | +3      | 3.166  | 0.409            |
| GVMLAVDAVIAELK                              | +2     |            | 3.281      | 0.470        | 0.9919  | 1      |                  |
| MASCOT:(PepMatched Observed.Hits Coverage)  |        |            | 8          | 2            |         | 25.98% |                  |
| Seq                                         | Charge | ObservedMS | ExpectedMS | CalculatedMS |         |        | PepScore PepHits |
| VGLQVVAVK                                   | +2     | 456.8105   | 911.6064   | 911.5803     | 0.03    | 38     | 1                |
| TVIIEQSWGSPK                                | +2     | 672.9059   | 1343.7972  | 1343.7085    | 0.09    | 58     | 1                |
| GYISPYFINTSK                                | +2     | 695.3934   | 1388.7722  | 1388.6976    | 0.07    | 41     | 1                |
| TLNDELEIIEGMK                               | +2     | 752.9029   | 1503.7912  | 1503.7490    | 0.04    | 89     | 1                |
| ISSIQSIVPALEIANHR                           | +3     | 640.3819   | 1918.1239  | 1918.0636    | 0.06    | 57     | 1                |
| ALMLQGVDLLADAVAVTMGPK                       | +3     | 705.0944   | 2112.2614  | 2112.1322    | 0.13    | 64     | 2                |
| LVQDVANNTNEEAGDGTATVTLAR                    | +3     | 854.1461   | 2559.4165  | 2559.2412    | 0.18    | 92     | 2                |
| QSKPVTTPPEEIAQVATISANGDKEIGNIISDAMK         | +4     | 889.7661   | 3555.0353  | 3554.8137    | 0.22    | 47     | 1                |

No. 68. Protein IPI00289334 Matched (SEQUEST MASCOT) Strategy.Hits PepMatched(SEQUEST MASCOT) SpectraMatched(SEQUEST MASCOT)  
 \*Des: Splice Isoform 1 of Filamin B

|                                             |        |      |       |            |         |       |   |
|---------------------------------------------|--------|------|-------|------------|---------|-------|---|
| Matched (SEQUEST MASCOT)                    | Y      | N    | 1     | 2          | 0       | 3     | 0 |
| SEQUEST:(PepMatched Observed.Hits Coverage) |        |      | 2     | 1          |         | 0.79% |   |
| Seq                                         | Charge | Xcor | Delta | Proability | PepHits |       |   |
| QMQLENVSVALEFLDRESIK                        | +3     |      | 3.591 | 0.380      | 0.9584  | 6     |   |
| QMQLENVSVALEFLDR                            | +2     |      | 3.976 | 0.557      | 1.0000  | 2     |   |
| MASCOT:(PepMatched Observed.Hits Coverage)  |        |      |       |            |         |       |   |

Identified Human Platelet Proteins

| No.   | Protein                                                        | Matched (SEQUEST MASCOT) | Strategy.Hits | PepMatched(SEQUEST MASCOT) | SpectraMatched(SEQUEST MASCOT) |
|-------|----------------------------------------------------------------|--------------------------|---------------|----------------------------|--------------------------------|
| 69.   | IPI00014516                                                    | Y Y                      | 2             | 2 4                        | 14 105                         |
| *Des: | Splice Isoform 1 of Caldesmon                                  |                          |               |                            |                                |
|       | SEQUEST:(PepMatched Observed.Hits Coverage)                    |                          | 2             | 12                         | 6.19%                          |
|       | Seq Charge Xcor Delta Probility PepHits                        |                          |               |                            |                                |
|       | TTTTNTQVEGDDEAAFLER                                            | +3                       | 3.048         | 0.458                      | 6                              |
|       | QKQEEESLGQVTDQVEVNAQNSVPDEEAK                                  | +3                       | 6.388         | 0.541                      | 1.0000 2                       |
|       | MASCOT:(PepMatched Observed.Hits Coverage)                     |                          | 4             | 11                         | 7.68%                          |
|       | Seq Charge ObservedMS ExpectedMS CalculatedMS Pepscore PepHits |                          |               |                            |                                |
|       | YEIEETETVTK                                                    | +2                       | 671.3240      | 1340.6335 1340.6347 0      | 47 10                          |
|       | TTTTNTQVEGDDEAAFLER                                            | +2                       | 1049.4834     | 2096.9522 2096.9498 0      | 135 60                         |
|       | QEEESLGQVTDQVEVNAQNSVPDEEAK                                    | +2                       | 1486.6874     | 2971.3602 2971.3530 0.01   | 74 35                          |
|       | QKQEEESLGQVTDQVEVNAQNSVPDEEAK                                  | +3                       | 1076.8450     | 3227.5131 3227.5065 0.01   | 56 90                          |

| No.   | Protein                                                        | Matched (SEQUEST MASCOT) | Strategy.Hits | PepMatched(SEQUEST MASCOT) | SpectraMatched(SEQUEST MASCOT) |
|-------|----------------------------------------------------------------|--------------------------|---------------|----------------------------|--------------------------------|
| 70.   | IPI00026314                                                    | Y Y                      | 2             | 7 9                        | 22 39                          |
| *Des: | Gelsolin precursor                                             |                          |               |                            |                                |
|       | SEQUEST:(PepMatched Observed.Hits Coverage)                    |                          | 7             | 12                         | 16.95%                         |
|       | Seq Charge Xcor Delta Probility PepHits                        |                          |               |                            |                                |
|       | SEDCFILDHGK                                                    | +2                       | 2.717         | 0.523                      | 0.9764 3                       |
|       | AGALNSNDAFVLK                                                  | +2                       | 2.725         | 0.475                      | 0.9538 2                       |
|       | TPSAAYLWVGTGASEAEK                                             | +2                       | 5.004         | 0.654                      | 1.0000 2                       |
|       | DPDQTDGLGLSYLSSHIANVER                                         | +3                       | 5.208         | 0.538                      | 1.0000 6                       |
|       | AQPVQVAEGSEPDGFWEALGGK                                         | +2                       | 5.636         | 0.625                      | 1.0000 6                       |
|       | EVQGFESATFLGYFK                                                | +2                       | 4.563         | 0.672                      | 1.0000 4                       |
|       | QGFEPFSFVGWFLGWDDDYWSVDPLDR                                    | +3                       | 3.052         | 0.420                      | 0.9928 3                       |
|       | MASCOT:(PepMatched Observed.Hits Coverage)                     |                          | 9             | 12                         | 24.74%                         |
|       | Seq Charge ObservedMS ExpectedMS CalculatedMS Pepscore PepHits |                          |               |                            |                                |
|       | AGALNSNDAFVLK                                                  | +2                       | 660.3492      | 1318.6838 1318.6880 0      | 41 3                           |
|       | EVQGFESATFLGYFK                                                | +2                       | 861.9240      | 1721.8335 1721.8300 0      | 100 4                          |
|       | VSNAGTMSVSLVADENPFAQGALK                                       | +2                       | 1232.6061     | 2463.1976 2462.2110 0.99   | 66 5                           |
|       | QGFEPFSFVGWFLGWDDDYWSVDPLDR                                    | +2                       | 1615.7328     | 3229.4510 3229.4457 0.01   | 58 3                           |
|       | ATEVPVSWESFNNGDCFILDLGNNIHQWCGSNSNR                            | +3                       | 1308.5669     | 3922.6789 3922.7427 -0.05  | 52 5                           |
|       | SEDCFILDHGK                                                    | +2                       | 632.2899      | 1262.5653 1262.5601 0.01   | 53 5                           |
|       | TPSAAYLWVGTGASEAEK                                             | +2                       | 919.4559      | 1836.8972 1836.8893 0.01   | 84 3                           |
|       | AQPVQVAEGSEPDGFWEALGGK                                         | +2                       | 1136.5527     | 2271.0909 2271.0807 0.01   | 88 11                          |
|       | DPDQTDGLGLSYLSSHIANVER                                         | +2                       | 1194.0782     | 2386.1419 2386.1400 0      | 95 11                          |

| No.   | Protein                                                        | Matched (SEQUEST MASCOT) | Strategy.Hits | PepMatched(SEQUEST MASCOT) | SpectraMatched(SEQUEST MASCOT) |
|-------|----------------------------------------------------------------|--------------------------|---------------|----------------------------|--------------------------------|
| 71.   | IPI00025512                                                    | Y Y                      | 2             | 2 2                        | 3 6                            |
| *Des: | Heat-shock protein beta-1                                      |                          |               |                            |                                |
|       | SEQUEST:(PepMatched Observed.Hits Coverage)                    |                          | 2             | 2                          | 13.87%                         |
|       | Seq Charge Xcor Delta Probility PepHits                        |                          |               |                            |                                |
|       | LATQSNEITIPVTFESR                                              | +2                       | 3.040         | 0.536                      | 0.9913 2                       |
|       | LFDQAFGLPR                                                     | +2                       | 3.350         | 0.9951                     | 2                              |
|       | MASCOT:(PepMatched Observed.Hits Coverage)                     |                          | 2             | 1                          | 13.87%                         |
|       | Seq Charge ObservedMS ExpectedMS CalculatedMS Pepscore PepHits |                          |               |                            |                                |



Identified Human Platelet Proteins

|                   |    |          |           |           |   |    |   |  |
|-------------------|----|----------|-----------|-----------|---|----|---|--|
| LFDQAFGLPR        | +2 | 582.3151 | 1162.6156 | 1162.6134 | 0 | 72 | 4 |  |
| LATQSNEITIPVTFESR | +2 | 953.4951 | 1904.9757 | 1904.9843 | 0 | 41 | 4 |  |

No. 72. Protein IPI00218816 Matched (SEQUEST MASCOT) Y Y Strategy.Hits 2 6 PepMatched(SEQUEST MASCOT) 7 38 SpectraMatched(SEQUEST MASCOT) 25

\*Des: Hemoglobin beta chain

| SEQUEST:(PepMatched Observed.Hits Coverage) |        | 6          | 1          | 58%                            |                      |
|---------------------------------------------|--------|------------|------------|--------------------------------|----------------------|
| Seq                                         | Charge | Xcor       | Delta      | Probility                      | PepHits              |
| VVAGVANALAHKY                               | +2     |            | 4.472      | 0.573                          | 1.0000 35            |
| VNVDEVGGEALGR                               | +2     |            | 4.156      | 0.581                          | 1.0000 7             |
| EFTPPVQAAYQK                                | +2     |            | 2.574      | 0.567                          | 0.9800 10            |
| SAVTALWGVKVVDEVGGEALGR                      |        |            |            | +3                             | 3.978 0.479 0.9971 4 |
| FFESFGDLSTPDAVMGNPK                         | +2     |            | 3.601      | 0.637                          | 1.0000 5             |
| VLGAFSDGLAHLNLIK                            | +2     |            | 4.693      | 0.579                          | 1.0000 9             |
| MASCOT:(PepMatched Observed.Hits Coverage)  |        | 7          | 2          | 64.66%                         |                      |
| Seq                                         | Charge | ObservedMS | ExpectedMS | CalculatedMS                   | Pepscore PepHits     |
| VNVDEVGGEALGR                               | +2     | 657.8361   | 1313.6577  | 1313.6575 0                    | 83 7                 |
| LLVVYPWTQR                                  | +2     | 637.8660   | 1273.7175  | 1273.7183 0                    | 48 18                |
| EFTPPVQAAYQK                                | +2     | 689.8538   | 1377.6931  | 1377.6928 0                    | 61 10                |
| FFESFGDLSTPDAVMGNPK                         | +2     | 1029.9731  | 2057.9317  | 2057.9404 0                    | 67 5                 |
| SAVTALWGVKVVDEVGGEALGR                      |        |            | +3         | 743.3950 2227.1630 2227.1596 0 | 45 3                 |
| VLGAFSDGLAHLNLIK                            | +2     | 835.4492   | 1668.8838  | 1668.8835 0                    | 95 10                |
| VVAGVANALAHK                                | +2     | 575.3438   | 1148.6729  | 1148.6665 0.01                 | 41 7                 |

No. 73. Protein IPI00043083 Matched (SEQUEST MASCOT) Y N Strategy.Hits 1 2 PepMatched(SEQUEST MASCOT) 0 3 SpectraMatched(SEQUEST MASCOT) 0

\*Des: Beta-parvin

| SEQUEST:(PepMatched Observed.Hits Coverage) |        | 2    | 3     | 8.08%     |          |
|---------------------------------------------|--------|------|-------|-----------|----------|
| Seq                                         | Charge | Xcor | Delta | Probility | PepHits  |
| LNVAEVTQSEIGQK                              | +2     |      | 3.625 | 0.522     | 0.9912 1 |
| VLLDWINDVLVEER                              | +2     |      | 5.102 | 0.440     | 0.9836 2 |

MASCOT:(PepMatched Observed.Hits Coverage)

No. 74. Protein IPI00008603 Matched (SEQUEST MASCOT) Y Y Strategy.Hits 2 7 PepMatched(SEQUEST MASCOT) 4 152 SpectraMatched(SEQUEST MASCOT) 36

\*Des: Actin, aortic smooth muscle

| SEQUEST:(PepMatched Observed.Hits Coverage) |        | 7          | 2          | 16.4%                 |                       |
|---------------------------------------------|--------|------------|------------|-----------------------|-----------------------|
| Seq                                         | Charge | Xcor       | Delta      | Probility             | PepHits               |
| AGFAGDDAPR                                  | +2     |            | 3.468      | 0.565                 | 0.9892 22             |
| HQGVVMVGMGQKDSYVGDEAQSQR                    |        |            |            | +3                    | 6.226 0.722 1.0000 55 |
| HQGVVMVGMGQKDSYVGDEAQSQR                    |        |            |            | +2                    | 6.111 0.680 1.0000 47 |
| MQKEITALAPSTMK                              | +2     |            | 4.972      | 0.602                 | 1.0000 37             |
| MQKEITALAPSTMKIK                            |        |            | +2         | 4.596 0.564 1.0000 51 |                       |
| AVFPSIVGRPR                                 | +2     |            | 3.292      | 0.490                 | 0.9833 32             |
| AGFAGDDAPRAVFPSIVGRPR                       | +3     |            | 5.152      | 0.638                 | 1.0000 35             |
| MASCOT:(PepMatched Observed.Hits Coverage)  |        | 4          | 1          | 15.36%                |                       |
| Seq                                         | Charge | ObservedMS | ExpectedMS | CalculatedMS          | Pepscore PepHits      |

Identified Human Platelet Proteins

|                          |    |           |           |           |      |    |    |
|--------------------------|----|-----------|-----------|-----------|------|----|----|
| YPIEHGIITNWDDMEK         | +2 | 980.9596  | 1959.9046 | 1959.9036 | 0    | 52 | 14 |
| YSVWIGGSILASLSTFQQMWISK  | +2 | 1301.6744 | 2601.3343 | 2601.3301 | 0    | 64 | 18 |
| KYSVWIGGSILASLSTFQQMWISK | +3 | 910.8171  | 2729.4296 | 2729.4250 | 0    | 44 | 10 |
| SYELPDGQVITIGNER         | +2 | 896.4413  | 1790.8680 | 1789.8846 | 0.98 | 59 | 32 |

No. 75. Protein IPI00216139 Matched (SEQUEST MASCOT) N Y Strategy. Hits 1 0 PepMatched (SEQUEST MASCOT) 3 0 SpectraMatched (SEQUEST MASCOT) 9

\*Des: Splice Isoform I of Septin-6

SEQUEST:(PepMatched Observed.Hits Coverage)

MASCOT:(PepMatched Observed.Hits Coverage)

| Seq                   | Charge | ObservedMS | ExpectedMS | CalculatedMS | PepScore | PepHits |
|-----------------------|--------|------------|------------|--------------|----------|---------|
| SLDDEVNAFK            | +2     | 569.3161   | 1136.6176  | 1136.5349    | 0.08     | 42      |
| KTAAELLQSQGSQAGGSQTLK | +3     | 701.7526   | 2102.2360  | 2102.0967    | 0.14     | 57      |
| TAAELLQSQGSQAGGSQTLKR | +3     | 711.0945   | 2130.2617  | 2130.1028    | 0.16     | 39      |

No. 76. Protein IPI00021304 Matched (SEQUEST MASCOT) Y Y Strategy. Hits 1 4 PepMatched (SEQUEST MASCOT) 2 21 SpectraMatched (SEQUEST MASCOT) 7

\*Des: Keratin, type II cytoskeletal 2 epidermal

SEQUEST:(PepMatched Observed.Hits Coverage)

| Seq                     | Charge | Xcor  | Delta | Probability | PepHits |
|-------------------------|--------|-------|-------|-------------|---------|
| GGSGGGGSISGGGYGSGGGSGGR | +2     | 4.898 | 0.812 | 1.0000      | 1       |
| FLEQQNQVLQTK            | +2     | 4.369 | 0.532 | 1.0000      | 13      |
| HGGGGGFGGGGFGSR         | +2     | 4.729 | 0.805 | 1.0000      | 10      |
| NLDLDSIIAEVKAQYEEIAQR   | +3     | 4.256 | 0.564 | 0.9992      | 4       |

MASCOT:(PepMatched Observed.Hits Coverage)

| Seq                     | Charge | ObservedMS | ExpectedMS | CalculatedMS | PepScore | PepHits |
|-------------------------|--------|------------|------------|--------------|----------|---------|
| GGSGGGGSISGGGYGSGGGSGGR | +2     | 871.3803   | 1740.7461  | 1740.7410    | 0.01     | 119     |
| HGGGGGFGGGGFGSR         | +2     | 660.7953   | 1319.5760  | 1319.5754    | 0        | 97      |

No. 77. Protein IPI00303476 Matched (SEQUEST MASCOT) Y Y Strategy. Hits 2 4 PepMatched (SEQUEST MASCOT) 17 11 SpectraMatched (SEQUEST MASCOT) 19

\*Des: ATP synthase beta chain, mitochondrial precursor

SEQUEST:(PepMatched Observed.Hits Coverage)

| Seq                        | Charge | Xcor  | Delta | Probability | PepHits |
|----------------------------|--------|-------|-------|-------------|---------|
| LVLEVAQH LGESTVR           | +2     | 3.397 | 0.604 | 0.9974      | 1       |
| SLQDIIAILGMDDELSEEDKLT VSR | +3     | 4.858 | 0.536 | 1.0000      | 2       |
| SLQDIIAILGMDDELSEEDK       | +2     | 5.382 | 0.549 | 0.9982      | 1       |
| DQEGQDVLLFIDNIFR           | +2     | 5.697 | 0.605 | 1.0000      | 7       |

MASCOT:(PepMatched Observed.Hits Coverage)

| Seq            | Charge | ObservedMS | ExpectedMS | CalculatedMS | PepScore | PepHits |
|----------------|--------|------------|------------|--------------|----------|---------|
| IPVGPETLGR     | +2     | 519.8312   | 1037.6478  | 1037.5869    | 0.06     | 40      |
| VVDLLAPYAK     | +2     | 544.8477   | 1087.6808  | 1087.6277    | 0.05     | 54      |
| TIAMDGTEGLVR   | +2     | 631.8669   | 1261.7192  | 1261.6336    | 0.09     | 89      |
| IMNVIGEPIDER   | +2     | 693.4072   | 1384.7998  | 1384.7020    | 0.1      | 66      |
| AHGGYSVFAGVGER | +2     | 703.8923   | 1405.7700  | 1405.6738    | 0.1      | 55      |
| FTQAGSEVSALLGR | +2     | 718.4072   | 1434.7998  | 1434.7466    | 0.05     | 104     |
| VALTGLTVAEYFR  | +2     | 720.4365   | 1438.8584  | 1438.7820    | 0.08     | 69      |

Identified Human Platelet Proteins

| Protein                          | Matched (SEQUEST MASCOT) | Strategy.Hits | PepMatched(SEQUEST MASCOT) | SpectraMatched(SEQUEST MASCOT) |
|----------------------------------|--------------------------|---------------|----------------------------|--------------------------------|
| TVLIMELINNVAK +2                 | 729.4641                 | 1456.9136     | 1456.8323                  | 0.08 63 1                      |
| IMDPNIVGSEHYDVAR +2              | 908.5078                 | 1815.0010     | 1814.8621                  | 0.14 91 3                      |
| VLDSGAPIKIPVGPETLGR +2           | 960.1154                 | 1918.2162     | 1918.0887                  | 0.13 50 2                      |
| DQEGQDVLLFDNIFR +2               | 961.5663                 | 1921.1180     | 1920.9581                  | 0.16 54 1                      |
| AIAELGIYPAVDPLDSTSR +2           | 994.5744                 | 1987.1342     | 1987.0262                  | 0.11 55 1                      |
| FLSQPFQVAEVFTGHMGK +3            | 675.0275                 | 2022.0607     | 2022.0032                  | 0.06 54 2                      |
| EGNDLYHEMIESGVINLK +3            | 687.7053                 | 2060.0941     | 2059.9884                  | 0.11 50 2                      |
| IPSAVGYQPTLATDMGTMQER +2         | 1133.5978                | 2265.1810     | 2265.0769                  | 0.1 68 1                       |
| SLQDIIAILGMDLSEEDKLTVSR +3       | 892.5360                 | 2674.5862     | 2674.3734                  | 0.21 40 1                      |
| GFQQILAGEYDHLPEQAFYMGPIEEAVAK +3 | 1117.6384                | 3349.8934     | 3349.6328                  | 0.26 40 1                      |

No. 78. Protein IPI00022039 Matched (SEQUEST MASCOT) N Y Strategy.Hits 1 0 PepMatched(SEQUEST MASCOT) 2 0 SpectraMatched(SEQUEST MASCOT) 4

\*Des: Leukocyte antigen CD84

SEQUEST:(PepMatched Observed.Hits Coverage) 2 1 13.47%

MASCOT:(PepMatched Observed.Hits Coverage)

| Seq                   | Charge | ObservedMS | ExpectedMS | CalculatedMS | Pepscore | PepHits |
|-----------------------|--------|------------|------------|--------------|----------|---------|
| TSVAYVTPGDSETAPVTVTHR | +3     | 763.1064   | 2286.2974  | 2286.1491    | 0.15     | 37 2    |
| VLPSKEEPVNTVYSEVQFADK | +3     | 793.7920   | 2378.3542  | 2378.2005    | 0.15     | 49 2    |

No. 79. Protein IPI00013219 Matched (SEQUEST MASCOT) Y Y Strategy.Hits 2 3 PepMatched(SEQUEST MASCOT) 9 5 SpectraMatched(SEQUEST MASCOT) 14

\*Des: Integrin-linked protein kinase 1

SEQUEST:(PepMatched Observed.Hits Coverage) 3 1 8.26%

| Seq            | Charge | Xcor  | Delta | Probability | PepHits |
|----------------|--------|-------|-------|-------------|---------|
| SVMIDEDMTAR    | +2     | 2.054 | 0.649 | 0.9800      | 7       |
| MYAPAWVAPEALQK | +2     | 3.452 | 0.615 | 0.9890      | 1       |
| SAVVEMLIMR     | +2     | 2.701 | 0.498 | 0.9769      | 2       |

MASCOT:(PepMatched Observed.Hits Coverage) 9 2 25.21%

| Seq             | Charge | ObservedMS | ExpectedMS | CalculatedMS | Pepscore | PepHits |
|-----------------|--------|------------|------------|--------------|----------|---------|
| FALDMAR         | +2     | 412.2354   | 822.4562   | 822.4058     | 0.05     | 42 2    |
| SAVVEMLIMR      | +2     | 574.8424   | 1147.6702  | 1147.6093    | 0.06     | 47 1    |
| FDMIVPILEK      | +2     | 602.8183   | 1203.6220  | 1203.6573    | -0.03    | 59 2    |
| SVMIDEDMTAR     | +2     | 634.3331   | 1266.6516  | 1266.5584    | 0.09     | 54 1    |
| LNENHSGELWK     | +2     | 663.8740   | 1325.7334  | 1325.6364    | 0.1      | 47 5    |
| MYAPAWVAPEALQK  | +2     | 787.9427   | 1573.8708  | 1573.7962    | 0.07     | 47 1    |
| GDDTPLHLAASHGHR | +3     | 528.6271   | 1582.8595  | 1582.7600    | 0.1      | 50 4    |
| GMAFLHTLEPLIPR  | +2     | 797.9661   | 1593.9176  | 1593.8701    | 0.05     | 47 2    |
| EVPFADLSNMEIGMK | +2     | 840.9219   | 1679.8292  | 1679.7898    | 0.04     | 77 2    |

No. 80. Protein IPI00027626 Matched (SEQUEST MASCOT) N Y Strategy.Hits 1 0 PepMatched(SEQUEST MASCOT) 3 0 SpectraMatched(SEQUEST MASCOT) 3

\*Des: T-complex protein 1, zeta subunit

SEQUEST:(PepMatched Observed.Hits Coverage)

MASCOT:(PepMatched Observed.Hits Coverage) 3 1 7.6%

| Seq         | Charge | ObservedMS | ExpectedMS | CalculatedMS | Pepscore | PepHits |
|-------------|--------|------------|------------|--------------|----------|---------|
| IITEGFEEAAK | +2     | 539.8272   | 1077.6398  | 1077.5706    | 0.07     | 69 1    |

Identified Human Platelet Proteins

|                  |    |          |           |           |      |    |   |  |
|------------------|----|----------|-----------|-----------|------|----|---|--|
| GIDPFSLDALSK     | +2 | 631.8637 | 1261.7128 | 1261.6554 | 0.06 | 52 | 1 |  |
| VLAQNSGFDLQETLVK | +2 | 881.5106 | 1761.0066 | 1760.9308 | 0.08 | 42 | 1 |  |

No. 81. Protein IPI00302679 Matched (SEQUEST MASCOT) Strategy.Hits PepMatched(SEQUEST MASCOT) SpectraMatched(SEQUEST MASCOT)  
 N Y 1 0 2 0 6

\*Des: Latent transforming growth factor beta binding protein 1 isoform LTBP-1S

SEQUEST:(PepMatched Observed.Hits Coverage)

|                                                                |    |           |           |           |       |    |    |
|----------------------------------------------------------------|----|-----------|-----------|-----------|-------|----|----|
| MASCOT:(PepMatched Observed.Hits Coverage)                     | 2  | 2         | 3.3%      |           |       |    |    |
| Seq Charge ObservedMS ExpectedMS CalculatedMS Pepscore PepHits |    |           |           |           |       |    |    |
| FLNSFEELQAEECGILNGCENGR                                        | +2 | 1286.5535 | 2571.0924 | 2571.1369 | -0.03 | 50 | 8  |
| DALVDFSEQYTPEADPYFIQDR+2                                       |    | 1310.0983 | 2618.1820 | 2618.1812 | 0     | 73 | 10 |

No. 82. Protein IPI00334432 Matched (SEQUEST MASCOT) Strategy.Hits PepMatched(SEQUEST MASCOT) SpectraMatched(SEQUEST MASCOT)  
 Y N 1 2 0 13 0

\*Des: 16 kDa protein

SEQUEST:(PepMatched Observed.Hits Coverage)

|                                            |    |       |        |        |   |  |  |
|--------------------------------------------|----|-------|--------|--------|---|--|--|
| MASCOT:(PepMatched Observed.Hits Coverage) | 2  | 1     | 20.68% |        |   |  |  |
| Seq Charge Xcor Delta Probility PepHits    |    |       |        |        |   |  |  |
| TYFPHFDLSHGSAQVK                           | +2 | 4.150 | 0.595  | 1.0000 | 6 |  |  |
| FLASVSTVLTSK                               | +2 | 3.850 | 0.565  | 0.9895 | 8 |  |  |

MASCOT:(PepMatched Observed.Hits Coverage)

No. 83. Protein IPI00215914 Matched (SEQUEST MASCOT) Strategy.Hits PepMatched(SEQUEST MASCOT) SpectraMatched(SEQUEST MASCOT)  
 Y N 1 2 0 3 0

\*Des: ADP-ribosylation factor 1

SEQUEST:(PepMatched Observed.Hits Coverage)

|                                            |    |       |       |        |   |  |  |
|--------------------------------------------|----|-------|-------|--------|---|--|--|
| MASCOT:(PepMatched Observed.Hits Coverage) | 2  | 2     | 14.2% |        |   |  |  |
| Seq Charge Xcor Delta Probility PepHits    |    |       |       |        |   |  |  |
| DAVLLVFANK                                 | +2 | 3.677 | 0.590 | 0.9967 | 2 |  |  |
| NISFTVVDVGGQDK+2                           |    | 3.967 | 0.477 | 0.9929 | 1 |  |  |

MASCOT:(PepMatched Observed.Hits Coverage)

No. 84. Protein IPI00003527 Matched (SEQUEST MASCOT) Strategy.Hits PepMatched(SEQUEST MASCOT) SpectraMatched(SEQUEST MASCOT)  
 N Y 1 0 2 0 2

\*Des: Ezrin-radixin-moesin binding phosphoprotein 50

SEQUEST:(PepMatched Observed.Hits Coverage)

|                                                                |   |          |           |           |      |    |   |
|----------------------------------------------------------------|---|----------|-----------|-----------|------|----|---|
| MASCOT:(PepMatched Observed.Hits Coverage)                     | 2 | 1        | 8.26%     |           |      |    |   |
| Seq Charge ObservedMS ExpectedMS CalculatedMS Pepscore PepHits |   |          |           |           |      |    |   |
| SVDPDSPAEEASGLR+2                                              |   | 700.8903 | 1399.7660 | 1399.6579 | 0.11 | 63 | 1 |
| LLVVDPETDEQLQK+2                                               |   | 813.9882 | 1625.9618 | 1625.8512 | 0.11 | 59 | 1 |

No. 85. Protein IPI00414554 Matched (SEQUEST MASCOT) Strategy.Hits PepMatched(SEQUEST MASCOT) SpectraMatched(SEQUEST MASCOT)  
 N Y 1 0 2 0 8

\*Des: Actin related protein 2/3 complex, subunit 5-like

SEQUEST:(PepMatched Observed.Hits Coverage)

|                                                                |    |           |           |           |      |    |   |
|----------------------------------------------------------------|----|-----------|-----------|-----------|------|----|---|
| MASCOT:(PepMatched Observed.Hits Coverage)                     | 2  | 2         | 25%       |           |      |    |   |
| Seq Charge ObservedMS ExpectedMS CalculatedMS Pepscore PepHits |    |           |           |           |      |    |   |
| VDIDEFDENKFKVDEQEAAAAAAAAEPGDPSEVDGLLR                         | +3 | 1329.9452 | 3986.8137 | 3986.8180 | 0    | 64 | 4 |
| RVDIDEFDENKFKVDEQEAAAAAAAAEPGDPSEVDGLLR                        | +3 | 1381.9838 | 4142.9295 | 4142.9191 | 0.01 | 82 | 4 |

Identified Human Platelet Proteins

| No.   | Protein                                                  | Matched (SEQUEST MASCOT) | Strategy.Hits | PepMatched(SEQUEST MASCOT) | SpectraMatched(SEQUEST MASCOT) |
|-------|----------------------------------------------------------|--------------------------|---------------|----------------------------|--------------------------------|
| 86.   | IPI00292858                                              | N Y                      | 1             | 0 7                        | 0 7                            |
| *Des: | Thymidine phosphorylase precursor                        |                          |               |                            |                                |
|       | SEQUEST:(PepMatched Observed.Hits Coverage)              |                          |               |                            |                                |
|       | MASCOT:(PepMatched Observed.Hits Coverage)               |                          |               |                            |                                |
|       | Seq                                                      | Charge                   | ObservedMS    | ExpectedMS                 | CalculatedMS                   |
|       | VAAALDDGSALGR                                            | +2                       | 608.3611      | 1214.7076                  | 1214.6255 0.08                 |
|       | MLAAQGVPGLAR                                             | +2                       | 649.8943      | 1297.7740                  | 1297.6812 0.09                 |
|       | KLVEGLSALVVDVK                                           | +2                       | 735.4976      | 1468.9806                  | 1468.8864 0.09                 |
|       | FGGAAVFPNQEQR                                            | +2                       | 746.4055      | 1490.7964                  | 1490.7265 0.07                 |
|       | DVTATVDSLPLITASILSK                                      | +2                       | 972.6245      | 1943.2344                  | 1943.0826 0.15                 |
|       | AREQEELLAPADGTVELVR                                      | +2                       | 1048.6356     | 2095.2566                  | 2095.0909 0.17                 |
|       | DLVTTLGGALLWLSGHAGTQAQGAAR                               | +4                       | 641.8824      | 2563.5005                  | 2563.3506 0.15                 |
|       |                                                          |                          |               |                            | Pepscore PepHits               |
|       |                                                          |                          |               |                            | 1 1 1 39 48 47 35 2            |
| 87.   | IPI00218820                                              | Y N                      | 1             | 2 0                        | 3 0                            |
| *Des: | Splice Isoform 3 of Tropomyosin beta chain               |                          |               |                            |                                |
|       | SEQUEST:(PepMatched Observed.Hits Coverage)              |                          |               |                            |                                |
|       | MASCOT:(PepMatched Observed.Hits Coverage)               |                          |               |                            |                                |
|       | Seq                                                      | Charge                   | Xcor          | Delta                      | Proability                     |
|       | TIDDLEETLASAK                                            | +2                       | 3.231         | 0.496                      | 0.9921                         |
|       | EENVEIHQTLTDLLELNN                                       | +2                       | 4.024         | 0.308                      | 0.9730                         |
|       |                                                          |                          |               |                            | PepHits                        |
|       |                                                          |                          |               |                            | 2 2                            |
| 88.   | IPI00004839                                              | Y Y                      | 1             | 2 2                        | 4 5                            |
| *Des: | Crk-like protein                                         |                          |               |                            |                                |
|       | SEQUEST:(PepMatched Observed.Hits Coverage)              |                          |               |                            |                                |
|       | MASCOT:(PepMatched Observed.Hits Coverage)               |                          |               |                            |                                |
|       | Seq                                                      | Charge                   | Xcor          | Delta                      | Proability                     |
|       | DSSTCPGDYVLSVSENSR                                       | +2                       | 3.028         | 0.464                      | 0.9583                         |
|       | TLYDFPGNDAEDLPFK                                         | +2                       | 3.562         | 0.519                      | 0.9838                         |
|       |                                                          |                          |               |                            | PepHits                        |
|       |                                                          |                          |               |                            | 2 2                            |
|       | Seq                                                      | Charge                   | ObservedMS    | ExpectedMS                 | CalculatedMS                   |
|       | TLYDFPGNDAEDLPFK                                         | +2                       | 921.4328      | 1840.8510                  | 1840.8519 0                    |
|       | DSSTCPGDYVLSVSENSR                                       | +2                       | 958.4234      | 1914.8322                  | 1914.8265 0.01                 |
|       |                                                          |                          |               |                            | Pepscore PepHits               |
|       |                                                          |                          |               |                            | 57 3 66 3                      |
| 89.   | IPI00395772                                              | N Y                      | 1             | 0 6                        | 0 29                           |
| *Des: | Similar to Smooth muscle myosin heavy chain isoform SM1A |                          |               |                            |                                |
|       | SEQUEST:(PepMatched Observed.Hits Coverage)              |                          |               |                            |                                |
|       | MASCOT:(PepMatched Observed.Hits Coverage)               |                          |               |                            |                                |
|       | Seq                                                      | Charge                   | ObservedMS    | ExpectedMS                 | CalculatedMS                   |
|       | RGDLPFVPRR                                               | +3                       | 437.9256      | 1310.7551                  | 1310.7571 0                    |
|       | VSHLLGINVDFTR                                            | +2                       | 786.4299      | 1570.8453                  | 1570.8467 0                    |
|       | RGDLPFVPR                                                | +2                       | 578.3350      | 1154.6554                  | 1154.6560 0                    |
|       | NTDQASMPDNATAAQKVSHLLGINVDFTR                            | +3                       | 1048.8545     | 3143.5416                  | 3143.5305 0.01                 |
|       | IAQLEEQLDNETKER                                          | +2                       | 908.4592      | 1814.9038                  | 1814.9010 0                    |
|       |                                                          |                          |               |                            | Pepscore PepHits               |
|       |                                                          |                          |               |                            | 14 8 18 62 4                   |

Identified Human Platelet Proteins

QLLQANPILEAFGNAK +2 863.9790 1725.9435 1725.9413 0 57 7

No. Protein Matched (SEQUEST MASCOT) Strategy.Hits PepMatched(SEQUEST MASCOT) SpectraMatched(SEQUEST MASCOT)  
 90. IPI00414127 N Y 1 0 2 0 7  
 \*Des: Ran-specific GTPase-activating protein  
 SEQUEST:(PepMatched Observed.Hits Coverage)  
 MASCOT:(PepMatched Observed.Hits Coverage) 2 3 22.92%  
 Seq Charge ObservedMS ExpectedMS CalculatedMS Pepscore PepHits  
 TLEEDEEELFK +2 691.3224 1380.6302 1380.6296 0 69 2  
 DTHEDHDTSTENTDESNHDPQFEPIVSLPEQEIK +3 1311.9077 3932.7013 3932.7096 0 52 2

No. Protein Matched (SEQUEST MASCOT) Strategy.Hits PepMatched(SEQUEST MASCOT) SpectraMatched(SEQUEST MASCOT)  
 91. IPI00020513 Y Y 2 5 5 13 28  
 \*Des: Zyxin  
 SEQUEST:(PepMatched Observed.Hits Coverage) 5 10 13.4%  
 Seq Charge Xcor Delta Probility PepHits  
 VNPFRPGDSEPPPAPGAQR +3 3.589 0.643 0.9994 6  
 VSSGYVPPPVPATPFSSK +2 3.282 0.645 0.9891 10  
 QHPVPPPAQNQNQVR +3 3.974 0.623 1.0000 6  
 FGPVVAPKPK +2 3.186 0.526 0.9859 13  
 GPPASSPAPAPK +2 3.608 0.521 0.9868 3  
 MASCOT:(PepMatched Observed.Hits Coverage) 5 13 14.26%  
 Seq Charge ObservedMS ExpectedMS CalculatedMS Pepscore PepHits  
 QNVAVNELCGR +2 601.8008 1201.5870 1201.5873 0 71 2  
 VSSIDLEIDSLSSLLDDMTK +2 1091.0468 2180.0790 2180.0770 0 137 14  
 EKVSSIDLEIDSLSSLLDDMTK +2 1219.6151 2437.2157 2437.2145 0 140 5  
 EVEELEQLTQQLMQDMEHPQR +3 871.0771 2610.2094 2610.2054 0 82 9  
 VSSIDLEIDSLSSLLDDMTKNDPFK +3 928.1301 2781.3686 2781.3630 0.01 59 5

No. Protein Matched (SEQUEST MASCOT) Strategy.Hits PepMatched(SEQUEST MASCOT) SpectraMatched(SEQUEST MASCOT)  
 92. IPI00032311 N Y 1 0 4 0 5  
 \*Des: Lipopolysaccharide-binding protein precursor  
 SEQUEST:(PepMatched Observed.Hits Coverage)  
 MASCOT:(PepMatched Observed.Hits Coverage) 4 1 12.85%  
 Seq Charge ObservedMS ExpectedMS CalculatedMS Pepscore PepHits  
 LAEGFPLPLLK +2 599.3957 1196.7768 1196.7168 0.06 55 1  
 ITLPDFTGDLR +2 624.3625 1246.7104 1246.6557 0.05 66 1  
 SPVTLLAAVMSLP EEHNK +3 646.0554 1935.1444 1935.0135 0.13 68 1  
 GLQYAAQEGLLALQSELLR +2 1037.1394 2072.2642 2072.1265 0.14 114 2

No. Protein Matched (SEQUEST MASCOT) Strategy.Hits PepMatched(SEQUEST MASCOT) SpectraMatched(SEQUEST MASCOT)  
 93. IPI00549304 N Y 1 0 2 0 4  
 \*Des: Ig gamma-1 chain C region  
 SEQUEST:(PepMatched Observed.Hits Coverage)  
 MASCOT:(PepMatched Observed.Hits Coverage) 2 1 5.18%  
 Seq Charge ObservedMS ExpectedMS CalculatedMS Pepscore PepHits  
 GPSVFPLAPSSK +2 593.8262 1185.6378 1185.6393 0 44 1

Identified Human Platelet Proteins

ALPAPIEKTISK +2 634.3849 1266.7552 1266.7547 0 58 32

No. Protein Matched (SEQUEST MASCOT) Strategy.Hits PepMatched(SEQUEST MASCOT) SpectraMatched(SEQUEST MASCOT)  
 94. IPI00432416 N Y 1 0 2 0 2

\*Des: LYN protein

SEQUEST:(PepMatched Observed.Hits Coverage)

MASCOT:(PepMatched Observed.Hits Coverage) 2 1 5.8%

| Seq            | Charge | ObservedMS | ExpectedMS | CalculatedMS | Pepscore | PepHits |
|----------------|--------|------------|------------|--------------|----------|---------|
| TQPVPESQLLPGQR | +2     | 775.4664   | 1548.9182  | 1548.8260    | 0.09     | 63 1    |
| EEPIYIITEYMAK  | +2     | 800.4593   | 1598.9040  | 1598.7901    | 0.11     | 44 1    |

No. Protein Matched (SEQUEST MASCOT) Strategy.Hits PepMatched(SEQUEST MASCOT) SpectraMatched(SEQUEST MASCOT)  
 95. IPI00294536 Y N 1 4 0 6 0

\*Des: Serine-threonine kinase receptor-associated protein

SEQUEST:(PepMatched Observed.Hits Coverage) 4 1 23.31%

| Seq                            | Charge | Xcor  | Delta | Proability | PepHits  |
|--------------------------------|--------|-------|-------|------------|----------|
| FSPDGELYASGSEDGTLR             | +2     |       | 2.783 | 0.484      | 0.9851 2 |
| TVDFTQDSNYLLTGGQDK             | +2     |       | 2.865 | 0.468      | 0.9777 1 |
| IGFPETEEEEIEIASSENSDCIFPSAPDVK | +3     |       | 4.188 | 0.454      | 0.9965 2 |
| YDYNSGEELESYK                  | +2     | 3.612 | 0.412 | 0.9908     | 2        |

MASCOT:(PepMatched Observed.Hits Coverage)

No. Protein Matched (SEQUEST MASCOT) Strategy.Hits PepMatched(SEQUEST MASCOT) SpectraMatched(SEQUEST MASCOT)  
 96. IPI00006510 Y Y 3 8 12 22 52

\*Des: Tubulin beta-1 chain

SEQUEST:(PepMatched Observed.Hits Coverage) 8 12 27.88%

| Seq                         | Charge | Xcor  | Delta | Proability | PepHits |
|-----------------------------|--------|-------|-------|------------|---------|
| ISVYYNEAYGR                 | +2     | 3.045 | 0.717 | 1.0000     | 1       |
| AVLEEDDEEVTEEAEMEPEDKG      | +2     | 3.654 | 0.631 | 1.0000     | 15      |
| IMNSFSVMPSPK                | +2     | 3.739 | 0.521 | 0.9875     | 3       |
| AVLVDLEPGTMDSIRSSK          | +3     | 2.491 | 0.605 | 0.9980     | 13      |
| IREEYPDRIMNSFSVMPSPK        | +4     | 4.173 | 0.552 | 0.9861     | 3       |
| SSKLGALFQPDSEFVHGNSGAGNNWAK | +3     | 5.246 | 0.528 | 0.9992     | 2       |
| LAVNMVPPFR                  | +2     | 3.142 | 0.647 | 1.0000     | 11      |
| ALSVAELTQQMFDAR             | +2     | 3.658 | 0.552 | 0.9870     | 3       |

MASCOT:(PepMatched Observed.Hits Coverage) 12 15 42.26%

| Seq                   | Charge | ObservedMS | ExpectedMS | CalculatedMS | Pepscore | PepHits |
|-----------------------|--------|------------|------------|--------------|----------|---------|
| GASALQLER             | +2     | 472.7985   | 943.5824   | 943.5087     | 0.07     | 71 5    |
| VSEHFSAMFK            | +2     | 591.8298   | 1181.6450  | 1181.5539    | 0.09     | 55 2    |
| KLAVNMVPPFR           | +2     | 636.4058   | 1270.7970  | 1270.7219    | 0.08     | 36 1    |
| ISVYYNEAYGR           | +2     | 667.8493   | 1333.6840  | 1333.6302    | 0.05     | 49 5    |
| IMNSFSVMPSPK          | +2     | 669.3722   | 1336.7298  | 1336.6519    | 0.08     | 85 5    |
| EVDQQLLSVQTR          | +2     | 708.4301   | 1414.8456  | 1414.7416    | 0.1      | 77 3    |
| ALSVAELTQQMFDAR       | +2     | 840.4720   | 1678.9294  | 1678.8348    | 0.09     | 93 10   |
| GHYTEGAELIENVLEVVR    | +2     | 1014.5446  | 2027.0746  | 2027.0323    | 0.04     | 94 2    |
| FWEMIGEEHGIDLAGSDR    | +2     | 1031.5135  | 2061.0124  | 2060.9261    | 0.09     | 89 20   |
| GLSMAATFIGNNTAIQEIFNR | +2     | 1134.6083  | 2267.2020  | 2267.1368    | 0.07     | 111 3   |

Identified Human Platelet Proteins

|                             |          |           |           |      |    |    |  |
|-----------------------------|----------|-----------|-----------|------|----|----|--|
| LHFFMPGFAPLTAQGSQQYR +3     | 766.0947 | 2295.2623 | 2295.1258 | 0.14 | 67 | 4  |  |
| LTTPTYGDLNHLVSLTMSGITSLR +3 | 897.8808 | 2690.6206 | 2690.3949 | 0.23 | 74 | 11 |  |

No. 97. Protein IPI00294395 Matched (SEQUEST MASCOT) N Y Strategy.Hits 1 0 PepMatched(SEQUEST MASCOT) 3 0 SpectraMatched(SEQUEST MASCOT) 3

\*Des: Complement component C8 beta chain precursor  
 SEQUEST:(PepMatched Observed.Hits Coverage)  
 MASCOT:(PepMatched Observed.Hits Coverage) 3 1 6.82%

| Seq             | Charge | ObservedMS | ExpectedMS | CalculatedMS | PepScore | PepHits |
|-----------------|--------|------------|------------|--------------|----------|---------|
| DTMVEDLVVLR     | +2     | 694.9212   | 1387.8278  | 1387.7381    | 0.09     | 60 1    |
| LPLEYSYGEYR     | +2     | 695.3823   | 1388.7500  | 1388.6612    | 0.09     | 53 1    |
| IPGIFELGISSQSDR | +2     | 809.9708   | 1617.9270  | 1617.8362    | 0.09     | 46 1    |

No. 98. Protein IPI00027497 Matched (SEQUEST MASCOT) N Y Strategy.Hits 1 0 PepMatched(SEQUEST MASCOT) 4 0 SpectraMatched(SEQUEST MASCOT) 4

\*Des: Glucose-6-phosphate isomerase  
 SEQUEST:(PepMatched Observed.Hits Coverage)  
 MASCOT:(PepMatched Observed.Hits Coverage) 4 1 11.64%

| Seq               | Charge | ObservedMS | ExpectedMS | CalculatedMS | PepScore | PepHits |
|-------------------|--------|------------|------------|--------------|----------|---------|
| TFTTQETITNAETAK   | +2     | 828.4677   | 1654.9208  | 1654.8050    | 0.12     | 51 1    |
| FAAYFQQGDMESNGK   | +2     | 846.9379   | 1691.8612  | 1691.7249    | 0.14     | 67 1    |
| ILLANFLAQTEALMR   | +2     | 852.5367   | 1703.0588  | 1702.9440    | 0.11     | 99 1    |
| TLAQLNPESSLFIIASK | +2     | 916.5572   | 1831.0998  | 1831.0091    | 0.09     | 56 1    |

No. 99. Protein IPI00011488 Matched (SEQUEST MASCOT) N Y Strategy.Hits 1 0 PepMatched(SEQUEST MASCOT) 3 0 SpectraMatched(SEQUEST MASCOT) 3

\*Des: Serine/threonine kinase 4  
 SEQUEST:(PepMatched Observed.Hits Coverage)  
 MASCOT:(PepMatched Observed.Hits Coverage) 3 1 10.21%

| Seq              | Charge | ObservedMS | ExpectedMS | CalculatedMS | PepScore | PepHits |
|------------------|--------|------------|------------|--------------|----------|---------|
| QVPVESDLQEIIK    | +2     | 749.4808   | 1496.9470  | 1496.8086    | 0.14     | 43 1    |
| LADFGVAGQLTDTMAK | +2     | 819.4644   | 1636.9142  | 1636.8130    | 0.1      | 49 1    |
| TLTEDEIATILQSTLK | +2     | 888.5479   | 1775.0812  | 1774.9564    | 0.12     | 37 1    |

No. 100. Protein IPI00329331 Matched (SEQUEST MASCOT) N Y Strategy.Hits 1 0 PepMatched(SEQUEST MASCOT) 3 0 SpectraMatched(SEQUEST MASCOT) 9

\*Des: Hypothetical protein UGP2  
 SEQUEST:(PepMatched Observed.Hits Coverage)  
 MASCOT:(PepMatched Observed.Hits Coverage) 3 1 10.53%

| Seq                | Charge | ObservedMS | ExpectedMS | CalculatedMS | PepScore | PepHits |
|--------------------|--------|------------|------------|--------------|----------|---------|
| GLPDNISSVLNK       | +2     | 628.8892   | 1255.7638  | 1255.6772    | 0.09     | 43 3    |
| IQRPPEDSIQPYEK     | +3     | 567.3280   | 1698.9622  | 1698.8577    | 0.1      | 44 3    |
| NENTFLDLTVQQIEHLNK | +3     | 719.4149   | 2155.2229  | 2155.0909    | 0.13     | 47 6    |

No. 101. Protein IPI00300725 Matched (SEQUEST MASCOT) N Y Strategy.Hits 1 0 PepMatched(SEQUEST MASCOT) 5 0 SpectraMatched(SEQUEST MASCOT) 40

\*Des: Keratin, type II cytoskeletal 6A



**Identified Human Platelet Proteins**

|              |                                                      |                                 |                      |                                   |                                       |           |       |        |          |         |
|--------------|------------------------------------------------------|---------------------------------|----------------------|-----------------------------------|---------------------------------------|-----------|-------|--------|----------|---------|
|              | <b>SEQUEST:(PepMatched Observed.Hits Coverage)</b>   |                                 |                      |                                   |                                       |           |       |        |          |         |
|              | <b>MASCOT:(PepMatched Observed.Hits Coverage)</b>    |                                 |                      |                                   |                                       |           |       |        |          |         |
|              | Seq                                                  | Charge                          | ObservedMS           | ExpectedMS                        | CalculatedMS                          |           |       |        | Pepscore | PepHits |
|              | AIGGGLSSVGGGSSTIK                                    |                                 | +2                   | 724.3907                          | 1446.7668                             | 1446.7677 | 0     | 89     | 6        |         |
|              | SGFSSVSVSR                                           |                                 | +2                   | 506.7564                          | 1011.4983                             | 1011.4985 | 0     | 62     | 12       |         |
|              | NLDLDSIIAEVKAQYEEIAQR                                |                                 | +3                   | 806.7565                          | 2417.2478                             | 2417.2437 | 0     | 70     | 8        |         |
|              | ADTLTDEINFLR                                         |                                 | +2                   | 704.3584                          | 1406.7022                             | 1406.7041 | 0     | 47     | 1        |         |
|              | NLDLDSIIAEVK                                         |                                 | +2                   | 665.3676                          | 1328.7206                             | 1328.7187 | 0     | 95     | 19       |         |
| <b>No.</b>   | <b>Protein</b>                                       | <b>Matched (SEQUEST MASCOT)</b> | <b>Strategy.Hits</b> | <b>PepMatched(SEQUEST MASCOT)</b> | <b>SpectraMatched(SEQUEST MASCOT)</b> |           |       |        |          |         |
| 102.         | IPI00014537                                          | Y                               | N                    | 1                                 | 2                                     | 0         | 6     | 0      |          |         |
| <b>*Des:</b> | Splice Isoform 1 of Calumenin precursor              |                                 |                      |                                   |                                       |           |       |        |          |         |
|              | <b>SEQUEST:(PepMatched Observed.Hits Coverage)</b>   |                                 |                      |                                   |                                       |           |       |        |          |         |
|              | Seq                                                  | Charge                          | Xcor                 | Delta                             | Probility                             | PepHits   |       |        |          |         |
|              | EEIVDKYDLFVGSQATDFGEALVR                             |                                 |                      |                                   | +3                                    | 4.639     | 0.489 | 0.9568 | 2        |         |
|              | NADGFIDLEEYIGDMYSHDGNTDEPEWVK                        |                                 |                      |                                   | +3                                    | 4.665     | 0.566 | 1.0000 | 3        |         |
|              | <b>MASCOT:(PepMatched Observed.Hits Coverage)</b>    |                                 |                      |                                   |                                       |           |       |        |          |         |
| <b>No.</b>   | <b>Protein</b>                                       | <b>Matched (SEQUEST MASCOT)</b> | <b>Strategy.Hits</b> | <b>PepMatched(SEQUEST MASCOT)</b> | <b>SpectraMatched(SEQUEST MASCOT)</b> |           |       |        |          |         |
| 103.         | IPI00020956                                          | Y                               | N                    | 1                                 | 2                                     | 0         | 5     | 0      |          |         |
| <b>*Des:</b> | Hepatoma-derived growth factor                       |                                 |                      |                                   |                                       |           |       |        |          |         |
|              | <b>SEQUEST:(PepMatched Observed.Hits Coverage)</b>   |                                 |                      |                                   |                                       |           |       |        |          |         |
|              | Seq                                                  | Charge                          | Xcor                 | Delta                             | Probility                             | PepHits   |       |        |          |         |
|              | EAENPEGEEKEAATLEVERPLPMEVEK                          |                                 |                      |                                   | +3                                    | 4.171     | 0.438 | 0.9805 | 4        |         |
|              | GPPQEEEEEEEEEEEEATKEDAEAPGIR                         |                                 |                      |                                   | +3                                    | 4.619     | 0.560 | 1.0000 | 5        |         |
|              | <b>MASCOT:(PepMatched Observed.Hits Coverage)</b>    |                                 |                      |                                   |                                       |           |       |        |          |         |
| <b>No.</b>   | <b>Protein</b>                                       | <b>Matched (SEQUEST MASCOT)</b> | <b>Strategy.Hits</b> | <b>PepMatched(SEQUEST MASCOT)</b> | <b>SpectraMatched(SEQUEST MASCOT)</b> |           |       |        |          |         |
| 104.         | IPI00179589                                          | N                               | Y                    | 1                                 | 0                                     | 3         | 0     | 5      |          |         |
| <b>*Des:</b> | Myotrophin                                           |                                 |                      |                                   |                                       |           |       |        |          |         |
|              | <b>SEQUEST:(PepMatched Observed.Hits Coverage)</b>   |                                 |                      |                                   |                                       |           |       |        |          |         |
|              | <b>MASCOT:(PepMatched Observed.Hits Coverage)</b>    |                                 |                      |                                   |                                       |           |       |        |          |         |
|              | Seq                                                  | Charge                          | ObservedMS           | ExpectedMS                        | CalculatedMS                          |           |       |        | Pepscore | PepHits |
|              | NGDLDEVKDYVAK                                        |                                 | +2                   | 733.8544                          | 1465.6942                             | 1464.7096 | 0.98  | 57     | 6        |         |
|              | GPDGLTAFEATDNQAIK                                    |                                 | +2                   | 874.4277                          | 1746.8408                             | 1746.8424 | 0     | 53     | 2        |         |
|              | NGDLDEVKDYVAKGEDVNR                                  |                                 | +3                   | 713.0063                          | 2135.9970                             | 2135.0130 | 0.98  | 51     | 2        |         |
| <b>No.</b>   | <b>Protein</b>                                       | <b>Matched (SEQUEST MASCOT)</b> | <b>Strategy.Hits</b> | <b>PepMatched(SEQUEST MASCOT)</b> | <b>SpectraMatched(SEQUEST MASCOT)</b> |           |       |        |          |         |
| 105.         | IPI00015911                                          | N                               | Y                    | 1                                 | 0                                     | 2         | 0     | 2      |          |         |
| <b>*Des:</b> | Dihydrolipoyl dehydrogenase, mitochondrial precursor |                                 |                      |                                   |                                       |           |       |        |          |         |
|              | <b>SEQUEST:(PepMatched Observed.Hits Coverage)</b>   |                                 |                      |                                   |                                       |           |       |        |          |         |
|              | <b>MASCOT:(PepMatched Observed.Hits Coverage)</b>    |                                 |                      |                                   |                                       |           |       |        |          |         |
|              | Seq                                                  | Charge                          | ObservedMS           | ExpectedMS                        | CalculatedMS                          |           |       |        | Pepscore | PepHits |
|              | NLGLEELGIELDPR                                       |                                 | +2                   | 784.4716                          | 1566.9286                             | 1566.8253 | 0.1   | 40     | 1        |         |
|              | IPNIYAIGDVVAGPMLAHK                                  |                                 | +3                   | 660.4018                          | 1978.1836                             | 1978.0709 | 0.11  | 66     | 1        |         |
| <b>No.</b>   | <b>Protein</b>                                       | <b>Matched (SEQUEST MASCOT)</b> | <b>Strategy.Hits</b> | <b>PepMatched(SEQUEST MASCOT)</b> | <b>SpectraMatched(SEQUEST MASCOT)</b> |           |       |        |          |         |

Identified Human Platelet Proteins

|       |                                             |        |            |            |              |      |    |                  |
|-------|---------------------------------------------|--------|------------|------------|--------------|------|----|------------------|
| 106.  | IPI00032826                                 | N      | Y          | 2          | 0            | 3    | 0  | 4                |
| *Des: | Hsc70-interacting protein                   |        |            |            |              |      |    |                  |
|       | SEQUEST:(PepMatched Observed.Hits Coverage) |        |            |            |              |      |    |                  |
|       | MASCOT:(PepMatched Observed.Hits Coverage)  |        |            |            |              |      |    |                  |
|       | Seq                                         | Charge | ObservedMS | ExpectedMS | CalculatedMS |      |    | Pepscore PepHits |
|       | AIDLFTDAIK                                  | +2     | 553.8451   | 1105.6756  | 1105.6019    | 0.07 | 46 | 1                |
|       | LDYDEDASAMLK                                | +2     | 685.8723   | 1369.7300  | 1369.6071    | 0.12 | 52 | 1                |
|       | VAAIEALNDGELQK                              | +2     | 735.9388   | 1469.8630  | 1469.7725    | 0.09 | 86 | 1                |

|       |                                             |                          |               |                            |                                |         |        |                  |
|-------|---------------------------------------------|--------------------------|---------------|----------------------------|--------------------------------|---------|--------|------------------|
| No.   | Protein                                     | Matched (SEQUEST MASCOT) | Strategy.Hits | PepMatched(SEQUEST MASCOT) | SpectraMatched(SEQUEST MASCOT) |         |        |                  |
| 107.  | IPI00023860                                 | Y                        | Y             | 2                          | 2                              | 5       | 2      | 8                |
| *Des: | Nucleosome assembly protein 1-like 1        |                          |               |                            |                                |         |        |                  |
|       | SEQUEST:(PepMatched Observed.Hits Coverage) |                          |               |                            |                                |         |        |                  |
|       | Seq                                         | Charge                   | Xcor          | Delta                      | Probility                      | PepHits |        |                  |
|       | EQSELDQDLDDVEEVEEETGEETK                    | +2                       |               |                            | 5.306                          | 0.688   | 1.0000 | 1                |
|       | FSDAGQPMSFVLEFHFEPNEYFTNEVLTK               | +3                       |               |                            | 3.549                          | 0.314   | 0.9587 | 3                |
|       | MASCOT:(PepMatched Observed.Hits Coverage)  |                          |               |                            |                                |         |        |                  |
|       | Seq                                         | Charge                   | ObservedMS    | ExpectedMS                 | CalculatedMS                   |         |        | Pepscore PepHits |
|       | FYEEVHDLER                                  | +2                       | 668.8668      | 1335.7190                  | 1335.6095                      | 0.11    | 52     | 2                |
|       | YAVLYQPLFDKR                                | +2                       | 756.9692      | 1511.9238                  | 1511.8136                      | 0.11    | 56     | 1                |
|       | LDGLVETPTGYIESLPR                           | +2                       | 930.5179      | 1859.0212                  | 1858.9676                      | 0.05    | 72     | 2                |
|       | NVDLLSDMVQEHDEPILK                          | +2                       | 1048.0781     | 2094.1416                  | 2094.0303                      | 0.11    | 63     | 2                |
|       | QLTVQMMQNPQILALQER                          | +2                       | 1106.6433     | 2211.2720                  | 2211.1503                      | 0.12    | 63     | 1                |

|       |                                             |                          |               |                            |                                |         |        |                  |
|-------|---------------------------------------------|--------------------------|---------------|----------------------------|--------------------------------|---------|--------|------------------|
| No.   | Protein                                     | Matched (SEQUEST MASCOT) | Strategy.Hits | PepMatched(SEQUEST MASCOT) | SpectraMatched(SEQUEST MASCOT) |         |        |                  |
| 108.  | IPI00007750                                 | Y                        | Y             | 3                          | 5                              | 5       | 14     | 46               |
| *Des: | Tubulin alpha-1 chain                       |                          |               |                            |                                |         |        |                  |
|       | SEQUEST:(PepMatched Observed.Hits Coverage) |                          |               |                            |                                |         |        |                  |
|       | Seq                                         | Charge                   | Xcor          | Delta                      | Probility                      | PepHits |        |                  |
|       | VGINYQPPTVVPGGDLAK                          | +2                       |               |                            | 3.212                          | 0.527   | 0.9904 | 2                |
|       | AFVHWYVGEGMEEGEFSEAR                        | +3                       |               |                            | 5.330                          | 0.530   | 0.9987 | 7                |
|       | TIGGGDSFTTFFCETGAGK                         | +2                       |               |                            | 4.512                          | 0.661   | 1.0000 | 2                |
|       | AVCMLSNTTAIAEAWAR                           | +2                       |               |                            | 4.313                          | 0.462   | 0.9931 | 2                |
|       | FDGALNVDLTEFQTNLVPYPR                       | +2                       |               |                            | 5.019                          | 0.641   | 1.0000 | 2                |
|       | MASCOT:(PepMatched Observed.Hits Coverage)  |                          |               |                            |                                |         |        |                  |
|       | Seq                                         | Charge                   | ObservedMS    | ExpectedMS                 | CalculatedMS                   |         |        | Pepscore PepHits |
|       | VGINYQPPTVVPGGDLAK                          | +2                       | 912.9960      | 1823.9775                  | 1823.9781                      | 0       | 42     | 6                |
|       | TIGGGDSFTTFFCETGAGK                         | +2                       | 1005.9447     | 2009.8749                  | 2009.8676                      | 0.01    | 74     | 2                |
|       | AVCMLSNTTAIAEAWAR                           | +2                       | 904.4417      | 1806.8689                  | 1806.8756                      | 0       | 58     | 6                |
|       | AFVHWYVGEGMEEGEFSEAR                        | +3                       | 777.3470      | 2329.0193                  | 2329.0109                      | 0.01    | 67     | 31               |
|       | FDGALNVDLTEFQTNLVPYPR                       | +2                       | 1205.1071     | 2408.1996                  | 2408.2012                      | 0       | 89     | 6                |

|       |                                             |                          |               |                            |                                |         |        |   |
|-------|---------------------------------------------|--------------------------|---------------|----------------------------|--------------------------------|---------|--------|---|
| No.   | Protein                                     | Matched (SEQUEST MASCOT) | Strategy.Hits | PepMatched(SEQUEST MASCOT) | SpectraMatched(SEQUEST MASCOT) |         |        |   |
| 109.  | IPI00007752                                 | Y                        | Y             | 2                          | 4                              | 5       | 10     | 6 |
| *Des: | Tubulin beta-? chain                        |                          |               |                            |                                |         |        |   |
|       | SEQUEST:(PepMatched Observed.Hits Coverage) |                          |               |                            |                                |         |        |   |
|       | Seq                                         | Charge                   | Xcor          | Delta                      | Probility                      | PepHits |        |   |
|       |                                             |                          |               |                            |                                | 1       | 14.12% |   |

Identified Human Platelet Proteins

| Protein                                    | Matched (SEQUEST MASCOT) | Strategy.Hits | PepMatched (SEQUEST MASCOT) | SpectraMatched (SEQUEST MASCOT) |          |         |
|--------------------------------------------|--------------------------|---------------|-----------------------------|---------------------------------|----------|---------|
| IMNTFSVVPSPK                               | +2                       | 3.512         | 0.336                       | 0.9608                          |          |         |
| IREEYPDRIMNTFSVVPSPK                       | +3                       | 3.133         | 0.564                       | 0.9982                          |          |         |
| AVLVDLEPGTMDSVR                            | +2                       | 3.537         | 0.431                       | 0.9745                          |          |         |
| SGPFGQIFRPDNFVFGQSGAGNNWAK                 | +3                       | 6.996         | 0.614                       | 1.0000                          |          |         |
| MASCOT:(PepMatched Observed.Hits Coverage) | 5                        | 1             | 20.08%                      |                                 |          |         |
| Seq                                        | Charge                   | ObservedMS    | ExpectedMS                  | CalculatedMS                    | PepScore | PepHits |
| INVYYNEATGGK                               | +2                       | 664.8632      | 1327.7118                   | 1327.6408                       | 0.07     | 80      |
| AVLVDLEPGTMDSVR                            | +2                       | 801.4329      | 1600.8512                   | 1600.8130                       | 0.04     | 71      |
| ALTVPELTQQMFDK                             | +2                       | 846.4822      | 1690.9498                   | 1690.8600                       | 0.09     | 37      |
| MSATFIGNSTAIQELFK                          | +2                       | 929.5013      | 1856.9880                   | 1856.9342                       | 0.05     | 98      |
| FWEVISDEHGIDPTGTYHGDSLQLER                 | +4                       | 779.9114      | 3115.6165                   | 3115.4159                       | 0.2      | 46      |

No. 110. Protein IPI00021327 Matched (SEQUEST MASCOT) Y N Strategy.Hits 1 2 PepMatched (SEQUEST MASCOT) 0 4 SpectraMatched (SEQUEST MASCOT) 0 3

\*Des: Growth factor receptor-bound protein 2

SEQUEST:(PepMatched Observed.Hits Coverage) 2 1 19.45%

| Seq                           | Charge | Xcor  | Delta | Probability | PepHits |
|-------------------------------|--------|-------|-------|-------------|---------|
| VLNEECDQNWYK                  | +2     | 3.334 | 0.479 | 0.9814      | 2       |
| DIEQVPQQPTYVQALFDFDPQEDGELGFR | +3     | 5.864 | 0.583 | 1.0000      | 3       |

MASCOT:(PepMatched Observed.Hits Coverage)

No. 111. Protein IPI00004416 Matched (SEQUEST MASCOT) N Y Strategy.Hits 1 0 PepMatched (SEQUEST MASCOT) 2 0 SpectraMatched (SEQUEST MASCOT) 0 3

\*Des: BC-2 protein

SEQUEST:(PepMatched Observed.Hits Coverage)

MASCOT:(PepMatched Observed.Hits Coverage) 2 1 8.84%

| Seq                 | Charge | ObservedMS | ExpectedMS | CalculatedMS | PepScore | PepHits |
|---------------------|--------|------------|------------|--------------|----------|---------|
| AEEAASALADADADLEER  | +2     | 894.9180   | 1787.8215  | 1787.8173    | 0        | 119     |
| KAEAAASALADADADLEER | +3     | 639.6413   | 1915.9021  | 1915.9122    | 0        | 43      |

No. 112. Protein IPI00419585 Matched (SEQUEST MASCOT) Y Y Strategy.Hits 1 2 PepMatched (SEQUEST MASCOT) 3 2 SpectraMatched (SEQUEST MASCOT) 2 22

\*Des: Peptidyl-prolyl cis-trans isomerase A

SEQUEST:(PepMatched Observed.Hits Coverage) 2 1 19.16%

| Seq                | Charge | Xcor  | Delta | Probability | PepHits |
|--------------------|--------|-------|-------|-------------|---------|
| VNPTVFFDIAVDGEPLGR | +3     | 4.096 | 0.630 | 1.0000      | 1       |
| VSFELFADKVPK       | +2     | 3.080 | 0.610 | 0.9787      | 3       |

MASCOT:(PepMatched Observed.Hits Coverage) 3 1 27.54%

| Seq                | Charge | ObservedMS | ExpectedMS | CalculatedMS | PepScore | PepHits |
|--------------------|--------|------------|------------|--------------|----------|---------|
| VNPTVFFDIAVDGEPLGR | +3     | 649.3386   | 1944.9939  | 1944.9944    | 0        | 51      |
| VKEGMNIVEAMER      | +2     | 753.3768   | 1504.7390  | 1504.7377    | 0        | 79      |
| VSFELFADKVPK       | +2     | 690.3843   | 1378.7541  | 1378.7496    | 0        | 44      |

No. 113. Protein IPI00555805 Matched (SEQUEST MASCOT) N Y Strategy.Hits 1 0 PepMatched (SEQUEST MASCOT) 2 0 SpectraMatched (SEQUEST MASCOT) 0 8

\*Des: Complement component 4A

SEQUEST:(PepMatched Observed.Hits Coverage)

| Identified Human Platelet Proteins                                    |                                                     |                          |               |                            |                                |  |  |  |  |  |
|-----------------------------------------------------------------------|-----------------------------------------------------|--------------------------|---------------|----------------------------|--------------------------------|--|--|--|--|--|
| MASCOT:(PepMatched Observed.Hits Coverage) 2 1 2.42%                  |                                                     |                          |               |                            |                                |  |  |  |  |  |
| Seq Charge ObservedMS ExpectedMS CalculatedMS Pepscore PepHits        |                                                     |                          |               |                            |                                |  |  |  |  |  |
| VLSLAQEQVGGSPK +2 771.4682 1540.9218 1540.8096 0.11 90 4              |                                                     |                          |               |                            |                                |  |  |  |  |  |
| VTASDPLDTLGSEGALSPGGVASLLR +2 1242.2310 2482.4474 2482.2914 0.16 42 8 |                                                     |                          |               |                            |                                |  |  |  |  |  |
| No. 114.                                                              | Protein                                             | Matched (SEQUEST MASCOT) | Strategy.Hits | PepMatched(SEQUEST MASCOT) | SpectraMatched(SEQUEST MASCOT) |  |  |  |  |  |
|                                                                       | IPI00549172                                         | N Y                      | 1             | 0 3                        | 0 40                           |  |  |  |  |  |
| *Des:                                                                 | Class IVb beta tubulin                              |                          |               |                            |                                |  |  |  |  |  |
| SEQUEST:(PepMatched Observed.Hits Coverage)                           |                                                     |                          |               |                            |                                |  |  |  |  |  |
| MASCOT:(PepMatched Observed.Hits Coverage) 3 1 12.36%                 |                                                     |                          |               |                            |                                |  |  |  |  |  |
| Seq Charge ObservedMS ExpectedMS CalculatedMS Pepscore PepHits        |                                                     |                          |               |                            |                                |  |  |  |  |  |
| IMNTFSVVPSPK +2 660.3575 1318.7004 1318.6955 0 50 2                   |                                                     |                          |               |                            |                                |  |  |  |  |  |
| SGPFGQIFRPDNFVFGQSGAGNNWAK +3 933.4526 2797.3359 2797.3360 0 104 6    |                                                     |                          |               |                            |                                |  |  |  |  |  |
| AVLVDLEPGTMDSVR +2 801.4147 1600.8148 1600.8130 0 85 32               |                                                     |                          |               |                            |                                |  |  |  |  |  |
| No. 115.                                                              | Protein                                             | Matched (SEQUEST MASCOT) | Strategy.Hits | PepMatched(SEQUEST MASCOT) | SpectraMatched(SEQUEST MASCOT) |  |  |  |  |  |
|                                                                       | IPI00009865                                         | Y Y                      | 1             | 9 7                        | 50 156                         |  |  |  |  |  |
| *Des:                                                                 | Keratin, type I cytoskeletal 10                     |                          |               |                            |                                |  |  |  |  |  |
| SEQUEST:(PepMatched Observed.Hits Coverage) 9 1 17.91%                |                                                     |                          |               |                            |                                |  |  |  |  |  |
| Seq Charge Xcor Delta Probility PepHits                               |                                                     |                          |               |                            |                                |  |  |  |  |  |
| DAEAWFNEK +2 2.949 0.663 1.0000 14                                    |                                                     |                          |               |                            |                                |  |  |  |  |  |
| GSLGGGFSSGGFSGGSFSR +2 5.579 0.769 1.0000 16                          |                                                     |                          |               |                            |                                |  |  |  |  |  |
| LKYENEVALR +2 3.188 0.503 0.9724 2                                    |                                                     |                          |               |                            |                                |  |  |  |  |  |
| IRLENEIQTYR +2 4.006 0.502 0.9796 1                                   |                                                     |                          |               |                            |                                |  |  |  |  |  |
| SQYQLAEQNRK +2 2.968 0.623 0.9880 10                                  |                                                     |                          |               |                            |                                |  |  |  |  |  |
| LASYLDKVR +2 3.151 0.527 0.9764 12                                    |                                                     |                          |               |                            |                                |  |  |  |  |  |
| SQYQLAEQNRKDAEAWFNEK +3 3.759 0.648 1.0000 14                         |                                                     |                          |               |                            |                                |  |  |  |  |  |
| NVSTGDVNVEMNAAPGVDLTQLLNMR +3 3.893 0.658 1.0000 11                   |                                                     |                          |               |                            |                                |  |  |  |  |  |
| ISSKGSLLGGGFSSGGFSGGSFSR +3 5.017 0.715 1.0000 4                      |                                                     |                          |               |                            |                                |  |  |  |  |  |
| MASCOT:(PepMatched Observed.Hits Coverage) 7 1 16.08%                 |                                                     |                          |               |                            |                                |  |  |  |  |  |
| Seq Charge ObservedMS ExpectedMS CalculatedMS Pepscore PepHits        |                                                     |                          |               |                            |                                |  |  |  |  |  |
| GSLGGGFSSGGFSGGSFSR +2 854.3914 1706.7683 1706.7647 0 133 45          |                                                     |                          |               |                            |                                |  |  |  |  |  |
| LKYENEVALR +2 617.8434 1233.6722 1233.6717 0 51 5                     |                                                     |                          |               |                            |                                |  |  |  |  |  |
| SQYQLAEQNRK +2 747.3709 1492.7273 1492.7270 0 65 21                   |                                                     |                          |               |                            |                                |  |  |  |  |  |
| DAEAWFNEK +2 555.2479 1108.4813 1108.4825 0 56 46                     |                                                     |                          |               |                            |                                |  |  |  |  |  |
| ISSKGSLLGGGFSSGGFSGGSFSR +3 737.3519 2209.0338 2209.0398 0 52 12      |                                                     |                          |               |                            |                                |  |  |  |  |  |
| NVSTGDVNVEMNAAPGVDLTQLLNMR +3 958.1369 2871.3889 2871.3854 0 57 29    |                                                     |                          |               |                            |                                |  |  |  |  |  |
| LASYLDKVR +2 532.8083 1063.6020 1063.6026 0 61 70                     |                                                     |                          |               |                            |                                |  |  |  |  |  |
| No. 116.                                                              | Protein                                             | Matched (SEQUEST MASCOT) | Strategy.Hits | PepMatched(SEQUEST MASCOT) | SpectraMatched(SEQUEST MASCOT) |  |  |  |  |  |
|                                                                       | IPI00011201                                         | N Y                      | 1             | 0 2                        | 0 2                            |  |  |  |  |  |
| *Des:                                                                 | NAD-dependent malic enzyme, mitochondrial precursor |                          |               |                            |                                |  |  |  |  |  |
| SEQUEST:(PepMatched Observed.Hits Coverage)                           |                                                     |                          |               |                            |                                |  |  |  |  |  |
| MASCOT:(PepMatched Observed.Hits Coverage) 2 1 5.55%                  |                                                     |                          |               |                            |                                |  |  |  |  |  |
| Seq Charge ObservedMS ExpectedMS CalculatedMS Pepscore PepHits        |                                                     |                          |               |                            |                                |  |  |  |  |  |
| TQQYDDLIDEFMK +2 823.4388 1644.8630 1644.7341 0.13 77 1               |                                                     |                          |               |                            |                                |  |  |  |  |  |
| ILGLGDLGVYGMGIPVGK +2 880.0525 1758.0904 1757.9749 0.12 72 1          |                                                     |                          |               |                            |                                |  |  |  |  |  |

Identified Human Platelet Proteins

|             |                                                           |                               |               |                             |                                  |                                      |       |        |    |  |
|-------------|-----------------------------------------------------------|-------------------------------|---------------|-----------------------------|----------------------------------|--------------------------------------|-------|--------|----|--|
| No.<br>117. | Protein<br>IPI00604537                                    | Matched (SEQUEST MASCOT)<br>N | Strategy<br>Y | Hits<br>1                   | PepMatched (SEQUEST MASCOT)<br>0 | SpectraMatched (SEQUEST MASCOT)<br>3 |       |        |    |  |
| *Des:       | Tropomyosin 1 alpha chain isoform 3                       |                               |               |                             |                                  |                                      |       |        |    |  |
|             | SEQUEST:(PepMatched Observed.Hits Coverage)               |                               |               |                             |                                  |                                      |       |        |    |  |
|             | MASCOT:(PepMatched Observed.Hits Coverage)                |                               |               |                             |                                  |                                      |       |        |    |  |
|             | Seq                                                       | Charge                        | ObservedMS    | ExpectedMS                  | CalculatedMS                     | Pepscore PepHits                     |       |        |    |  |
|             | MEIQEIQLK                                                 | +2                            | 566.3069      | 1130.5992                   | 1130.6005                        | 0                                    | 62    | 3      |    |  |
|             | KLVIIESDLER                                               | +2                            | 657.8842      | 1313.7538                   | 1313.7554                        | 0                                    | 53    | 12     |    |  |
|             | DEEKMEIQEIQLK                                             | +2                            | 816.9116      | 1631.8086                   | 1631.8076                        | 0                                    | 47    | 3      |    |  |
| No.<br>118. | Protein<br>IPI00010697                                    | Matched (SEQUEST MASCOT)<br>Y | Strategy<br>Y | Hits<br>1                   | PepMatched (SEQUEST MASCOT)<br>3 | SpectraMatched (SEQUEST MASCOT)<br>2 | 4 18  |        |    |  |
| *Des:       | Splice Isoform Alpha-6X1X2B of Integrin alpha-6 precursor |                               |               |                             |                                  |                                      |       |        |    |  |
|             | SEQUEST:(PepMatched Observed.Hits Coverage)               |                               |               |                             |                                  |                                      |       |        |    |  |
|             | Seq                                                       | Charge                        | Xcor          | Delta                       | Probility                        | PepHits                              |       |        |    |  |
|             | IEFDNDADPTSESKEDQWMGVTVQSQGPGGK                           |                               |               |                             | +3                               | 3.712                                | 0.461 | 0.9868 | 2  |  |
|             | NIGDINQDGYPDIAVGAPYDDLK                                   | +2                            |               |                             | +2                               | 3.608                                | 0.521 | 0.9942 | 2  |  |
|             | SEDEVGSLIEYEF                                             | +2                            | 4.016         | 0.592                       | 0.9983                           | 1                                    |       |        |    |  |
|             | MASCOT:(PepMatched Observed.Hits Coverage)                |                               |               |                             |                                  |                                      |       |        |    |  |
|             | Seq                                                       | Charge                        | ObservedMS    | ExpectedMS                  | CalculatedMS                     | Pepscore PepHits                     |       |        |    |  |
|             | SEDEVGSLIEYEF                                             | +2                            | 836.8872      | 1671.7599                   | 1671.7627                        | 0                                    | 63    | 6      |    |  |
|             | NIGDINQDGYPDIAVGAPYDDLK                                   | +2                            |               | 1260.6139                   | 2519.2132                        | 2519.1815                            | 0.03  | 50     | 12 |  |
| No.<br>119. | Protein<br>IPI00009867                                    | Matched (SEQUEST MASCOT)<br>Y | Strategy<br>Y | Hits<br>1                   | PepMatched (SEQUEST MASCOT)<br>2 | SpectraMatched (SEQUEST MASCOT)<br>3 | 2 9   |        |    |  |
| *Des:       | Keratin, type II cytoskeletal 5                           |                               |               |                             |                                  |                                      |       |        |    |  |
|             | SEQUEST:(PepMatched Observed.Hits Coverage)               |                               |               |                             |                                  |                                      |       |        |    |  |
|             | Seq                                                       | Charge                        | Xcor          | Delta                       | Probility                        | PepHits                              |       |        |    |  |
|             | SFSTASAITPSVSR                                            | +2                            | 2.832         | 0.545                       | 0.9797                           | 4                                    |       |        |    |  |
|             | NKYEDEINKR                                                | +2                            | 2.772         | 0.513                       | 0.9648                           | 1                                    |       |        |    |  |
|             | MASCOT:(PepMatched Observed.Hits Coverage)                |                               |               |                             |                                  |                                      |       |        |    |  |
|             | Seq                                                       | Charge                        | ObservedMS    | ExpectedMS                  | CalculatedMS                     | Pepscore PepHits                     |       |        |    |  |
|             | SFSTASAITPSVSR                                            | +2                            | 705.8656      | 1409.7167                   | 1409.7150                        | 0                                    | 58    | 4      |    |  |
|             | GLGVGFGSGGGSSSSVK                                         | +2                            |               | 720.3607                    | 1438.7068                        | 1438.7051                            | 0     | 44     | 3  |  |
|             | SLYNLGGSKR                                                | +2                            | 547.8004      | 1093.5863                   | 1093.5880                        | 0                                    | 64    | 7      |    |  |
| No.<br>120. | Protein<br>IPI00010402                                    | Matched (SEQUEST MASCOT)<br>N | Strategy<br>Y | Hits<br>1                   | PepMatched (SEQUEST MASCOT)<br>0 | SpectraMatched (SEQUEST MASCOT)<br>2 | 0 8   |        |    |  |
| *Des:       | Hypothetical protein                                      |                               |               |                             |                                  |                                      |       |        |    |  |
|             | SEQUEST:(PepMatched Observed.Hits Coverage)               |                               |               |                             |                                  |                                      |       |        |    |  |
|             | MASCOT:(PepMatched Observed.Hits Coverage)                |                               |               |                             |                                  |                                      |       |        |    |  |
|             | Seq                                                       | Charge                        | ObservedMS    | ExpectedMS                  | CalculatedMS                     | Pepscore PepHits                     |       |        |    |  |
|             | IYQLVDISQDNALRDEM                                         | +3                            |               | 769.7188                    | 2306.1344                        | 2306.1324                            | 0     | 61     | 4  |  |
|             | ATPPQIVNGDQYCGDYELFVEAVEQNTLQEFK                          | +3                            |               | 1253.9327                   | 3758.7764                        | 3757.7820                            | 0.99  | 75     | 9  |  |
| No.         | Protein                                                   | Matched (SEQUEST MASCOT)      | Strategy.Hits | PepMatched (SEQUEST MASCOT) | SpectraMatched (SEQUEST MASCOT)  |                                      |       |        |    |  |

**Identified Human Platelet Proteins**

|       |                                                    |                          |               |                            |                                |         |        |    |          |         |
|-------|----------------------------------------------------|--------------------------|---------------|----------------------------|--------------------------------|---------|--------|----|----------|---------|
| 121.  | IPI00032831                                        | N                        | Y             | 1                          | 0                              | 2       | 0      | 10 |          |         |
| *Des: | SynaptoSomal-aAssociated protein 29                |                          |               |                            |                                |         |        |    |          |         |
|       | SEQUEST:(PepMatched Observed.Hits Coverage)        |                          |               |                            |                                |         |        |    |          |         |
|       | MASCOT:(PepMatched Observed.Hits Coverage)         |                          |               |                            |                                |         |        |    |          |         |
|       | Seq                                                | Charge                   | ObservedMS    | ExpectedMS                 | CalculatedMS                   |         |        |    | PepScore | PepHits |
|       | SYNPFDDGGEDEGARPAWR                                | +3                       | 765.3294      | 2292.9664                  | 2292.9671                      | 0       | 48     |    | 4        |         |
|       | LKDIALGMQTEIEEQDDILDR                              | +3                       | 815.7455      | 2444.2146                  | 2444.2104                      | 0       | 59     |    | 3        |         |
| No.   | Protein                                            | Matched (SEQUEST MASCOT) | Strategy.Hits | PepMatched(SEQUEST MASCOT) | SpectraMatched(SEQUEST MASCOT) |         |        |    |          |         |
| 122.  | IPI00027146                                        | N                        | Y             | 1                          | 0                              | 2       | 0      | 2  |          |         |
| *Des: | Glutamate dehydrogenase 2, mitochondrial precursor |                          |               |                            |                                |         |        |    |          |         |
|       | SEQUEST:(PepMatched Observed.Hits Coverage)        |                          |               |                            |                                |         |        |    |          |         |
|       | MASCOT:(PepMatched Observed.Hits Coverage)         |                          |               |                            |                                |         |        |    |          |         |
|       | Seq                                                | Charge                   | ObservedMS    | ExpectedMS                 | CalculatedMS                   |         |        |    | PepScore | PepHits |
|       | YSTDVSVDK                                          | +2                       | 621.3475      | 1240.6804                  | 1240.5823                      | 0.1     | 56     |    | 1        |         |
|       | IIAEGANGPTTPEADKIFLER                              | +3                       | 748.1169      | 2241.3289                  | 2241.1640                      | 0.16    | 49     |    | 1        |         |
| No.   | Protein                                            | Matched (SEQUEST MASCOT) | Strategy.Hits | PepMatched(SEQUEST MASCOT) | SpectraMatched(SEQUEST MASCOT) |         |        |    |          |         |
| 123.  | IPI00398192                                        | N                        | Y             | 1                          | 0                              | 2       | 0      | 4  |          |         |
| *Des: | Docking protein 2, isoform a                       |                          |               |                            |                                |         |        |    |          |         |
|       | SEQUEST:(PepMatched Observed.Hits Coverage)        |                          |               |                            |                                |         |        |    |          |         |
|       | MASCOT:(PepMatched Observed.Hits Coverage)         |                          |               |                            |                                |         |        |    |          |         |
|       | Seq                                                | Charge                   | ObservedMS    | ExpectedMS                 | CalculatedMS                   |         |        |    | PepScore | PepHits |
|       | LYLLAAPAAER                                        | +2                       | 594.3478      | 1186.6810                  | 1186.6710                      | 0.01    | 38     |    | 2        |         |
|       | GQEGEYAVPFDAVAR                                    | +2                       | 804.9405      | 1607.8664                  | 1607.7579                      | 0.11    | 39     |    | 2        |         |
| No.   | Protein                                            | Matched (SEQUEST MASCOT) | Strategy.Hits | PepMatched(SEQUEST MASCOT) | SpectraMatched(SEQUEST MASCOT) |         |        |    |          |         |
| 124.  | IPI00479185                                        | N                        | Y             | 1                          | 0                              | 2       | 0      | 13 |          |         |
| *Des: | Tropomyosin 3                                      |                          |               |                            |                                |         |        |    |          |         |
|       | SEQUEST:(PepMatched Observed.Hits Coverage)        |                          |               |                            |                                |         |        |    |          |         |
|       | MASCOT:(PepMatched Observed.Hits Coverage)         |                          |               |                            |                                |         |        |    |          |         |
|       | Seq                                                | Charge                   | ObservedMS    | ExpectedMS                 | CalculatedMS                   |         |        |    | PepScore | PepHits |
|       | MELQEIQLKEAK                                       | +2                       | 730.3938      | 1458.7730                  | 1458.7752                      | 0       | 81     |    | 3        |         |
|       | KLVIIEGDLER                                        | +2                       | 642.8796      | 1283.7446                  | 1283.7448                      | 0       | 60     |    | 12       |         |
| No.   | Protein                                            | Matched (SEQUEST MASCOT) | Strategy.Hits | PepMatched(SEQUEST MASCOT) | SpectraMatched(SEQUEST MASCOT) |         |        |    |          |         |
| 125.  | IPI00218847                                        | Y                        | N             | 1                          | 2                              | 0       | 9      | 0  |          |         |
| *Des: | Acid phosphAtAse 1 isoform b                       |                          |               |                            |                                |         |        |    |          |         |
|       | SEQUEST:(PepMatched Observed.Hits Coverage)        |                          |               |                            |                                |         |        |    |          |         |
|       | MASCOT:(PepMatched Observed.Hits Coverage)         |                          |               |                            |                                |         |        |    |          |         |
|       | Seq                                                | Charge                   | Xcor          | Delta                      | Proability                     | PepHits |        |    |          |         |
|       | QLIIEDPYYGNDSDVFETVYQQCVR                          | +3                       |               |                            | 4.758                          | 0.512   | 0.9996 |    | 4        |         |
|       | EDFATFDYILCMDESNLR                                 | +2                       |               |                            | 4.755                          | 0.653   | 1.0000 |    | 1        |         |
|       | MASCOT:(PepMatched Observed.Hits Coverage)         |                          |               |                            |                                |         |        |    |          |         |
| No.   | Protein                                            | Matched (SEQUEST MASCOT) | Strategy.Hits | PepMatched(SEQUEST MASCOT) | SpectraMatched(SEQUEST MASCOT) |         |        |    |          |         |
| 126.  | IPI00033494                                        | Y                        | N             | 1                          | 3                              | 0       | 17     | 0  |          |         |
| *Des: | Myosin regulatory light chain                      |                          |               |                            |                                |         |        |    |          |         |

Identified Human Platelet Proteins

| No.   | Protein                                                | Matched (SEQUEST MASCOT) | Strategy   | Hits       | PepMatched (SEQUEST MASCOT) | SpectraMatched (SEQUEST MASCOT) |
|-------|--------------------------------------------------------|--------------------------|------------|------------|-----------------------------|---------------------------------|
| 127.  | IPI00442122                                            | N                        | Y          | 1          | 0                           | 8                               |
| *Des: | Hypothetical protein FLJ16459                          |                          |            |            |                             |                                 |
|       | SEQUEST:(PepMatched Observed.Hits Coverage) 3 4 29.14% |                          |            |            |                             |                                 |
|       | Seq                                                    | Charge                   | Xcor       | Delta      | Probability                 | PepHits                         |
|       | GNFNYIEFTR                                             | +2                       |            | 3.417      | 0.619                       | 0.9967 2                        |
|       | DGFIDKEDLHDMLASLGK                                     | +2                       |            | 5.490      | 0.603                       | 1.0000 7                        |
|       | NAFACFDEEATGTIQEDYLR                                   | +2                       |            | 6.037      | 0.664                       | 1.0000 3                        |
|       | MASCOT:(PepMatched Observed.Hits Coverage)             |                          |            |            |                             |                                 |
| 128.  | IPI00441320                                            | N                        | Y          | 1          | 0                           | 22                              |
| *Des: | Splice Isoform 10 of Abl-interactor 1                  |                          |            |            |                             |                                 |
|       | SEQUEST:(PepMatched Observed.Hits Coverage)            |                          |            |            |                             |                                 |
|       | MASCOT:(PepMatched Observed.Hits Coverage) 2 1 7.36%   |                          |            |            |                             |                                 |
|       | Seq                                                    | Charge                   | ObservedMS | ExpectedMS | CalculatedMS                | Pepscore PepHits                |
|       | LVIIESDLER                                             | +2                       | 593.8366   | 1185.6587  | 1185.6605 0                 | 43 6                            |
|       | KLVIIESDLER                                            | +2                       | 657.8850   | 1313.7555  | 1313.7554 0                 | 41 1                            |
|       | AEDSLLAAEEAAAK                                         | +2                       | 694.8535   | 1387.6925  | 1387.6830 0.01              | 51 1                            |
|       | DEEKMEIQEQLK                                           | +2                       | 816.9136   | 1631.8126  | 1631.8076 0                 | 53 5                            |
| 129.  | IPI00412473                                            | N                        | Y          | 1          | 0                           | 15                              |
| *Des: | Protein                                                |                          |            |            |                             |                                 |
|       | SEQUEST:(PepMatched Observed.Hits Coverage)            |                          |            |            |                             |                                 |
|       | MASCOT:(PepMatched Observed.Hits Coverage) 2 1 18.75%  |                          |            |            |                             |                                 |
|       | Seq                                                    | Charge                   | ObservedMS | ExpectedMS | CalculatedMS                | Pepscore PepHits                |
|       | AEEYEFLTPVEEAPK                                        | +2                       | 876.4238   | 1750.8330  | 1750.8301 0                 | 42 9                            |
|       | SIQEIQLDKDDESLR                                        | +2                       | 959.4736   | 1916.9326  | 1916.9327 0                 | 61 21                           |
| 130.  | IPI00021263                                            | Y                        | Y          | 2          | 4                           | 18                              |
| *Des: | 14-3-3 protein zeta/delta                              |                          |            |            |                             |                                 |
|       | SEQUEST:(PepMatched Observed.Hits Coverage) 4 20 24.8% |                          |            |            |                             |                                 |
|       | Seq                                                    | Charge                   | Xcor       | Delta      | Probability                 | PepHits                         |
|       | TAFDEAIAELDTLSEESYKDSTLIMQLLR                          | +3                       |            | 6.752      | 0.640                       | 1.0000 3                        |
|       | GIVDQSQQAYQEAFFEISK                                    | +2                       |            | 4.562      | 0.564                       | 0.9947 1                        |
|       | TAFDEAIAELDTLSEESYK                                    | +2                       |            | 5.938      | 0.565                       | 1.0000 5                        |
|       | DICNDVLSLLEK                                           | +2                       | 4.610      | 0.570      | 0.9952                      | 2                               |
|       | MASCOT:(PepMatched Observed.Hits Coverage) 5 21 30.8%  |                          |            |            |                             |                                 |
|       | Seq                                                    | Charge                   | ObservedMS | ExpectedMS | CalculatedMS                | Pepscore PepHits                |

Identified Human Platelet Proteins

|                               |    |           |           |           |   |    |   |  |
|-------------------------------|----|-----------|-----------|-----------|---|----|---|--|
| DICNDVLSLLEK                  | +2 | 681.3533  | 1360.6921 | 1360.6908 | 0 | 88 | 1 |  |
| SVTEQGAELSNEER                | +2 | 774.8627  | 1547.7109 | 1547.7063 | 0 | 62 | 5 |  |
| TAFDEAIAELDTLSEESYK           | +2 | 1066.5005 | 2130.9864 | 2130.9844 | 0 | 96 | 6 |  |
| TAFDEAIAELDTLSEESYKDSTLIMQLLR | +3 | 1101.5499 | 3301.6280 | 3301.6275 | 0 | 65 | 2 |  |
| GIVDQSQQAYQEAFEISK            | +2 | 1020.9994 | 2039.9842 | 2039.9799 | 0 | 62 | 3 |  |

No. 131. Protein IPI00218343 Matched (SEQUEST MASCOT) Strategy.N Y 2 0 13 0 141 Hits PepMatched(SEQUEST MASCOT) SpectraMatched(SEQUEST MASCOT)

\*Des: Tubulin alpha-6 chain

SEQUEST:(PepMatched Observed.Hits Coverage)

MASCOT:(PepMatched Observed.Hits Coverage) 13 3 43.98%

| Seq                   | Charge | ObservedMS | ExpectedMS | CalculatedMS | Pepscore | PepHits |
|-----------------------|--------|------------|------------|--------------|----------|---------|
| EIIDLVLDR             | +2     | 543.3373   | 1084.6600  | 1084.6128    | 0.05     | 2       |
| AVFVDLEPTVIDEVR       | +2     | 851.4733   | 1700.9320  | 1700.8984    | 0.03     | 2       |
| NLDIERPTYTNLNR        | +2     | 860.0055   | 1717.9964  | 1717.8747    | 0.12     | 9       |
| TIGGGDDSFNTFFSETGAGK  | +2     | 1004.4775  | 2006.9404  | 2006.8857    | 0.05     | 97      |
| DVNAAIATIK            | +2     | 508.3234   | 1014.6322  | 1014.5709    | 0.06     | 5       |
| LDHKFDLMYAK           | +2     | 690.8901   | 1379.7656  | 1379.6907    | 0.07     | 7       |
| QLFHPEQLITGK          | +2     | 705.9436   | 1409.8726  | 1409.7667    | 0.11     | 39      |
| IHFPLATYAPVISA EK     | +2     | 879.0443   | 1756.0740  | 1755.9559    | 0.12     | 55      |
| VGINYQPPTVVPGGDLAK    | +2     | 912.9926   | 1823.9706  | 1823.9781    | 0        | 43      |
| AFVHWYVGEEMEEGFSEAR   | +3     | 777.4111   | 2329.2115  | 2329.0109    | 0.2      | 50      |
| FDGALNVDLTFEQTNLVPYPR | +3     | 803.8040   | 2408.3902  | 2408.2012    | 0.19     | 75      |
| QLFHPEQLITGKEDAANNYAR | +3     | 805.7762   | 2414.3068  | 2414.1978    | 0.11     | 57      |
| LISQIVSSITASLR        | +2     | 744.4900   | 1486.9654  | 1486.8719    | 0.09     | 89      |

No. 132. Protein IPI00413922 Matched (SEQUEST MASCOT) Strategy.N Y 1 0 8 0 44 Hits PepMatched(SEQUEST MASCOT) SpectraMatched(SEQUEST MASCOT)

\*Des: Hypothetical protein

SEQUEST:(PepMatched Observed.Hits Coverage)

MASCOT:(PepMatched Observed.Hits Coverage) 8 7 68.83%

| Seq                         | Charge | ObservedMS | ExpectedMS | CalculatedMS | Pepscore | PepHits |
|-----------------------------|--------|------------|------------|--------------|----------|---------|
| HVLVTLGEK                   | +2     | 498.2971   | 994.5797   | 994.5811     | 0        | 60      |
| EAFQLFDR                    | +2     | 513.2542   | 1024.4939  | 1024.4978    | 0        | 53      |
| DQGTIEDYVEGLR               | +2     | 772.8479   | 1543.6812  | 1543.6790    | 0        | 82      |
| VFDKEGNGTVMGAEIR            | +2     | 862.4200   | 1722.8255  | 1721.8406    | 0.98     | 49      |
| NKDQGTIEDYVEGLR             | +2     | 893.9158   | 1785.8171  | 1785.8169    | 0        | 58      |
| MTEEEVEMLVAGHEDSNGCINYEELVR | +3     | 1033.1212  | 3096.3418  | 3095.3521    | 0.99     | 112     |
| ILYSQCGDVMR                 | +2     | 642.8071   | 1283.5996  | 1283.6002    | 0        | 54      |
| ALGQNPTNAEVLK               | +2     | 677.8689   | 1353.7232  | 1353.7252    | 0        | 51      |

No. 133. Protein IPI00005087 Matched (SEQUEST MASCOT) Strategy.Y Y 1 2 4 12 18 Hits PepMatched(SEQUEST MASCOT) SpectraMatched(SEQUEST MASCOT)

\*Des: Tropomodulin-3

SEQUEST:(PepMatched Observed.Hits Coverage) 2 5 11.73%

| Seq                | Charge | Xcor  | Delta | Probability | PepHits |
|--------------------|--------|-------|-------|-------------|---------|
| YKDLDEDELLGNLSETLK | +2     | 5.117 | 0.609 | 1.0000      | 4       |



Identified Human Platelet Proteins

| No.   | Protein                                     | Matched (SEQUEST MASCOT) | Strategy   | Hits       | PepMatched (SEQUEST MASCOT) | SpectraMatched (SEQUEST MASCOT) |        |                  |
|-------|---------------------------------------------|--------------------------|------------|------------|-----------------------------|---------------------------------|--------|------------------|
| 134.  | IPI00022640                                 | Y                        | N          | 1          | 2                           | 0                               | 2      | 0                |
| *Des: | Neurogranin                                 |                          |            |            |                             |                                 |        |                  |
|       | SEQUEST:(PepMatched Observed.Hits Coverage) |                          |            | 2          | 1                           |                                 | 31.25% |                  |
|       | Seq                                         | Charge                   | Xcor       | Delta      | Proability                  | PepHits                         |        |                  |
|       | DREDYVPTYGEEK                               | +2                       |            | 736.3397   | 1470.6649                   | 1470.6626                       | 0      | 53               |
|       | DLDEDELLGNLSETELK                           | +2                       |            | 966.9689   | 1931.9232                   | 1931.9211                       | 0      | 112              |
|       | YKDLDEDELLGNLSETELK                         | +2                       |            | 1112.5483  | 2223.0821                   | 2223.0794                       | 0      | 119              |
|       | QLETVLDDLDPENALLPAGFR                       | +2                       |            | 1163.5994  | 2325.1842                   | 2325.1852                       | 0      | 77               |
|       | MASCOT:(PepMatched Observed.Hits Coverage)  |                          |            | 4          | 5                           |                                 | 15.36% |                  |
|       | Seq                                         | Charge                   | ObservedMS | ExpectedMS | CalculatedMS                |                                 |        | Pepscore PepHits |
|       | DREDYVPTYGEEK                               | +2                       | 736.3397   | 1470.6649  | 1470.6626                   | 0                               | 53     | 2                |
|       | DLDEDELLGNLSETELK                           | +2                       | 966.9689   | 1931.9232  | 1931.9211                   | 0                               | 112    | 2                |
|       | YKDLDEDELLGNLSETELK                         | +2                       | 1112.5483  | 2223.0821  | 2223.0794                   | 0                               | 119    | 8                |
|       | QLETVLDDLDPENALLPAGFR                       | +2                       | 1163.5994  | 2325.1842  | 2325.1852                   | 0                               | 77     | 7                |
| 135.  | IPI00479403                                 | N                        | Y          | 1          | 0                           | 2                               | 0      | 9                |
| *Des: | Keratin, type II cytoskeletal 6C            |                          |            |            |                             |                                 |        |                  |
|       | SEQUEST:(PepMatched Observed.Hits Coverage) |                          |            | 2          | 1                           |                                 | 6.63%  |                  |
|       | MASCOT:(PepMatched Observed.Hits Coverage)  |                          |            | 2          | 1                           |                                 |        |                  |
|       | Seq                                         | Charge                   | ObservedMS | ExpectedMS | CalculatedMS                |                                 |        | Pepscore PepHits |
|       | SGFSSISVSR                                  | +2                       | 513.7630   | 1025.5114  | 1025.5141                   | 0                               | 82     | 11               |
|       | AIGGLSSVGGGSSTIKYTTTSSSR                    | +3                       |            | 806.7417   | 2417.2033                   | 2417.2033                       | 0      | 53               |
|       |                                             |                          |            |            |                             |                                 |        | 9                |
| 136.  | IPI00021841                                 | Y                        | Y          | 2          | 14                          | 20                              | 103    | 121              |
| *Des: | Apolipoprotein A-I precursor                |                          |            |            |                             |                                 |        |                  |
|       | SEQUEST:(PepMatched Observed.Hits Coverage) |                          |            | 14         | 1                           |                                 | 51.83% |                  |
|       | Seq                                         | Charge                   | Xcor       | Delta      | Proability                  | PepHits                         |        |                  |
|       | ATEHLSTLSEK                                 | +2                       |            | 3.243      | 0.511                       | 0.9844                          | 9      |                  |
|       | LAARLEALKENGGAR                             |                          |            | +3         | 4.117                       | 0.606                           | 1.0000 | 24               |
|       | THLAPYSDELRR                                | +2                       |            | 3.595      | 0.583                       | 0.9802                          | 16     |                  |
|       | THLAPYSDELRR                                | +2                       |            | 2.652      | 0.712                       | 1.0000                          | 11     |                  |
|       | ARAHVDALRTHLAPYSDELRR                       | +3                       |            | 3.271      | 0.456                       | 0.9935                          | 4      |                  |
|       | AHVDALRTHLAPYSDELRR                         | +3                       |            | 5.431      | 0.609                       | 1.0000                          | 11     |                  |
|       | DYVSQFEGSALGK                               | +2                       |            | 4.361      | 0.589                       | 1.0000                          | 12     |                  |
|       | VKDLATVYVDVLDKDSGR                          | +2                       |            | 5.128      | 0.629                       | 1.0000                          | 6      |                  |
|       | LLDNWDSVTSTFSK                              | +2                       |            | 4.362      | 0.643                       | 1.0000                          | 14     |                  |
|       | DLATVYVDVLDK                                | +2                       |            | 3.335      | 0.584                       | 0.9888                          | 12     |                  |
|       | LAEYHAKATEHLSTLSEK                          | +2                       |            | 4.965      | 0.617                       | 1.0000                          | 16     |                  |
|       | DSGRDYVSQFEGSALGK                           | +2                       |            | 4.767      | 0.561                       | 1.0000                          | 7      |                  |
|       | VSFLSALEEYTK                                | +2                       |            | 3.641      | 0.691                       | 1.0000                          | 4      |                  |
|       | VKDLATVYVDVLDK                              | +2                       |            | 3.943      | 0.628                       | 1.0000                          | 4      |                  |
|       | MASCOT:(PepMatched Observed.Hits Coverage)  |                          |            | 20         | 2                           |                                 | 68.75% |                  |
|       | Seq                                         | Charge                   | ObservedMS | ExpectedMS | CalculatedMS                |                                 |        | Pepscore PepHits |

Identified Human Platelet Proteins

|                       |    |           |           |           |   |     |    |  |
|-----------------------|----|-----------|-----------|-----------|---|-----|----|--|
| LEALKENGGAR           | +2 | 579.3168  | 1156.6191 | 1156.6200 | 0 | 69  | 3  |  |
| ATEHLSTLSEK           | +2 | 608.3141  | 1214.6137 | 1214.6143 | 0 | 65  | 8  |  |
| LAARLEALKENGGAR       | +2 | 784.9482  | 1567.8819 | 1567.8793 | 0 | 84  | 23 |  |
| AKPALEDLR             | +2 | 506.7928  | 1011.5711 | 1011.5713 | 0 | 44  | 3  |  |
| LSPLGEEMR             | +2 | 516.2639  | 1030.5133 | 1030.5117 | 0 | 51  | 6  |  |
| DLATVYVDVLK           | +2 | 618.3465  | 1234.6784 | 1234.6809 | 0 | 89  | 12 |  |
| THLAPYSDEL R          | +2 | 651.3279  | 1300.6413 | 1300.6411 | 0 | 49  | 12 |  |
| DYVSQFE G SALGK       | +2 | 700.8376  | 1399.6606 | 1399.6619 | 0 | 108 | 12 |  |
| VEPLRAELQEGAR         | +2 | 734.3998  | 1466.7850 | 1466.7841 | 0 | 58  | 11 |  |
| THLAPYSDEL RQR        | +2 | 793.4082  | 1584.8019 | 1584.8008 | 0 | 59  | 17 |  |
| LLDNWDSVTSTFSK        | +2 | 806.8965  | 1611.7785 | 1611.7780 | 0 | 100 | 14 |  |
| VKDLATVYVDVLKDSGR     | +2 | 939.5213  | 1877.0280 | 1877.0258 | 0 | 85  | 6  |  |
| LAEYHAKATEHLSTLSEK    | +2 | 1014.5256 | 2027.0366 | 2027.0323 | 0 | 99  | 16 |  |
| AHVDALRTHLAPYSDEL R   | +3 | 688.6919  | 2063.0539 | 2063.0548 | 0 | 55  | 12 |  |
| AHVDALRTHLAPYSDEL RQR | +3 | 783.4122  | 2347.2147 | 2347.2145 | 0 | 46  | 10 |  |
| QGLLPVLESFK           | +2 | 615.8561  | 1229.6977 | 1229.7019 | 0 | 43  | 11 |  |
| DSGRDYVSQFE G SALGK   | +2 | 908.4294  | 1814.8442 | 1814.8434 | 0 | 73  | 7  |  |
| ARAHVDALRTHLAPYSDEL R | +3 | 764.4041  | 2290.1905 | 2290.1930 | 0 | 43  | 4  |  |
| VSFLSALEEYTK          | +2 | 693.8625  | 1385.7104 | 1385.7078 | 0 | 77  | 4  |  |
| VKDLATVYVDVLK         | +2 | 731.9292  | 1461.8438 | 1461.8442 | 0 | 73  | 4  |  |

|       |                                             |                          |                   |                            |                                |
|-------|---------------------------------------------|--------------------------|-------------------|----------------------------|--------------------------------|
| No.   | Protein                                     | Matched (SEQUEST MASCOT) | Strategy.Hits     | PepMatched(SEQUEST MASCOT) | SpectraMatched(SEQUEST MASCOT) |
| 137.  | IPI00012011                                 | Y N                      | 1 2               | 0 10                       | 0                              |
| *Des: | Cofilin-1                                   |                          |                   |                            |                                |
|       | SEQUEST:(PepMatched Observed.Hits Coverage) |                          | 2 1               | 20.83%                     |                                |
|       | Seq Charge Xcor Delta                       |                          | Probility PepHits |                            |                                |
|       | LGSAVISLEGKP +2                             | 4.458                    | 0.571             | 1.0000                     | 10                             |
|       | EILVGDVGQTVDDPYATFVK +2                     | 3.792                    | 0.675             | 1.0000                     | 2                              |
|       | MASCOT:(PepMatched Observed.Hits Coverage)  |                          |                   |                            |                                |

|       |                                             |                          |                   |                            |                                |
|-------|---------------------------------------------|--------------------------|-------------------|----------------------------|--------------------------------|
| No.   | Protein                                     | Matched (SEQUEST MASCOT) | Strategy.Hits     | PepMatched(SEQUEST MASCOT) | SpectraMatched(SEQUEST MASCOT) |
| 138.  | IPI00010779                                 | Y Y                      | 2 4               | 10 19                      | 176                            |
| *Des: | Tropomyosin 4                               |                          |                   |                            |                                |
|       | SEQUEST:(PepMatched Observed.Hits Coverage) |                          | 4 5               | 24.5%                      |                                |
|       | Seq Charge Xcor Delta                       |                          | Probility PepHits |                            |                                |
|       | KLVILEGELER +2                              | 3.663                    | 0.457             | 0.9943                     | 5                              |
|       | EENVGLHQTL DQTLNELNC +2                     | 4.477                    | 0.562             | 0.9978                     | 3                              |
|       | YSEKEDKYE E E I K +3                        | 3.617                    | 0.403             | 0.9914                     | 7                              |
|       | KIQALQQQA DE A EDR +2                       | 4.648                    | 0.669             | 1.0000                     | 7                              |
|       | MASCOT:(PepMatched Observed.Hits Coverage)  |                          | 10 4              | 41.1%                      |                                |
|       | Seq Charge ObservedMS                       |                          | ExpectedMS        | CalculatedMS               | Pepscore PepHits               |
|       | KLVILEGELERA E E R +2                       | 892.5018                 | 1782.9890         | 1782.9839                  | 0.01 67 18                     |
|       | HIAEEADRKY E E VAR +2                       | 908.4541                 | 1814.8937         | 1814.8911                  | 0 50 52                        |
|       | GMKVIENR +2                                 | 473.7601                 | 945.5056          | 945.5065                   | 0 41 15                        |
|       | IQLVEEELDRAQER +2                           | 864.4539                 | 1726.8932         | 1726.8849                  | 0.01 54 144                    |
|       | LATALQKLE E A E K +2                        | 722.4055                 | 1442.7965         | 1442.7980                  | 0 50 3                         |
|       | TIDDLEEKLAQAK +2                            | 737.3920                 | 1472.7694         | 1472.7722                  | 0 72 7                         |

Identified Human Platelet Proteins

|                      |    |          |           |           |           |    |    |    |
|----------------------|----|----------|-----------|-----------|-----------|----|----|----|
| MEIQEMQLKEAK         | +2 | 739.3730 | 1476.7315 | 1476.7316 | 0         | 64 | 4  |    |
| LATALQKLEEAKEKADESER | +3 |          | 734.7131  | 2201.1176 | 2201.1175 | 0  | 64 | 39 |
| KLVILEGELER          | +2 | 649.8878 | 1297.7611 | 1297.7605 | 0         | 76 | 38 |    |
| MEIQEMQLK            | +2 | 575.2856 | 1148.5566 | 1148.5569 | 0         | 58 | 15 |    |

No. 139. Protein IPI0000075 Matched (SEQUEST MASCOT) Strategy.Hits PepMatched(SEQUEST MASCOT) SpectraMatched(SEQUEST MASCOT)  
 N Y 1 0 2 0 3

\*Des: Transforming growth factor beta 1 precursor  
 SEQUEST:(PepMatched Observed.Hits Coverage)

|                                            |            |              |           |           |   |    |          |         |
|--------------------------------------------|------------|--------------|-----------|-----------|---|----|----------|---------|
| MASCOT:(PepMatched Observed.Hits Coverage) | 2          | 1            | 5.54%     |           |   |    |          |         |
| Seq Charge ObservedMS                      | ExpectedMS | CalculatedMS |           |           |   |    | PepScore | PepHits |
| VAGESAEPEPEPEADYYAK                        | +2         | 1026.4581    | 2050.9017 | 2050.9007 | 0 | 58 | 4        |         |
| DRVAGESAEPEPEPEADYYAK                      | +3         | 775.0174     | 2322.0304 | 2322.0287 | 0 | 51 | 2        |         |

No. 140. Protein IPI0005809 Matched (SEQUEST MASCOT) Strategy.Hits PepMatched(SEQUEST MASCOT) SpectraMatched(SEQUEST MASCOT)  
 Y Y 3 6 5 24 28

\*Des: Serum deprivation response

|                                              |            |              |           |           |           |           |           |         |     |
|----------------------------------------------|------------|--------------|-----------|-----------|-----------|-----------|-----------|---------|-----|
| SEQUEST:(PepMatched Observed.Hits Coverage)  | 6          | 14           | 31.17%    |           |           |           |           |         |     |
| Seq Charge Xcor Delta Probility PepHits      |            |              |           |           |           |           |           |         |     |
| ISSGKSPFKVSPLTFGR                            | +2         | 4.917        | 0.575     | 1.0000    | 13        |           |           |         |     |
| YEGSYALTSEEAEERSDGPVQPAVLQVHQT               | +3         |              | 7.065     | 0.800     | 1.0000    | 8         |           |         |     |
| RLENNHAQLLRR                                 | +3         | 3.353        | 0.323     | 0.9711    | 8         |           |           |         |     |
| QEKPSPPMPSPSTPSPSLNLGNTTEAIR                 | +3         |              | 3.895     | 0.316     | 0.9565    | 1         |           |         |     |
| VLIFQEENEIPASVFKQPVSGAVEGK                   | +3         |              | 4.558     | 0.581     | 0.9993    | 2         |           |         |     |
| SLTSNHQKISSGK                                | +2         | 3.372        | 0.563     | 0.9769    | 1         |           |           |         |     |
| MASCOT:(PepMatched Observed.Hits Coverage)   | 5          | 15           | 29.09%    |           |           |           |           |         |     |
| Seq Charge ObservedMS                        | ExpectedMS | CalculatedMS |           |           |           |           | PepScore  | PepHits |     |
| YEGSYALTSEEAEER                              | +2         | 802.8583     | 1603.7021 | 1603.7001 | 0         | 74        | 2         |         |     |
| DNSQVNAVTVLTLDDK                             | +2         |              | 865.4722  | 1728.9299 | 1728.9257 | 0         | 139       | 3       |     |
| VLIFQEENEIPASVFK                             | +2         |              | 981.5338  | 1961.0530 | 1961.0509 | 0         | 71        | 2       |     |
| GSNSGMDSNIDLTIIVEDEEEESVALEQAQK              | +2         |              |           | 1619.2362 | 3236.4579 | 3236.4513 | 0.01      | 84      | 5   |
| SEDLPSSEQMPNDQEEESFAEGHSEASLASALVEGEIAEEAAEK | +3         |              |           |           | 1559.6858 | 4676.0355 | 4676.0354 | 0       | 103 |

5

No. 141. Protein IPI00010414 Matched (SEQUEST MASCOT) Strategy.Hits PepMatched(SEQUEST MASCOT) SpectraMatched(SEQUEST MASCOT)  
 Y Y 2 5 6 21 14

\*Des: PDZ and LIM domain protein 1

|                                             |            |              |           |           |        |    |          |         |
|---------------------------------------------|------------|--------------|-----------|-----------|--------|----|----------|---------|
| SEQUEST:(PepMatched Observed.Hits Coverage) | 5          | 4            | 20.35%    |           |        |    |          |         |
| Seq Charge Xcor Delta Probility PepHits     |            |              |           |           |        |    |          |         |
| GCTDNLTLTVAR                                | +2         | 2.734        | 0.499     | 0.9738    | 2      |    |          |         |
| DFEQPLAISR                                  | +2         | 3.094        | 0.389     | 0.9622    | 2      |    |          |         |
| GHFFVEDQIYCEK                               | +2         | 3.780        | 0.571     | 0.9937    | 3      |    |          |         |
| VWSPLVTEEGK                                 | +2         | 2.715        | 0.442     | 0.9547    | 2      |    |          |         |
| QSTSFLVLQEILESEEK                           | +2         |              | 4.231     | 0.596     | 0.9947 | 2  |          |         |
| MASCOT:(PepMatched Observed.Hits Coverage)  | 6          | 6            | 26.34%    |           |        |    |          |         |
| Seq Charge ObservedMS                       | ExpectedMS | CalculatedMS |           |           |        |    | PepScore | PepHits |
| DFEQPLAISR                                  | +2         | 588.3056     | 1174.5967 | 1174.5982 | 0      | 65 | 1        |         |

Identified Human Platelet Proteins

|                           |    |          |           |           |   |     |   |
|---------------------------|----|----------|-----------|-----------|---|-----|---|
| SAMPFTASPASSTAR           | +2 | 791.8798 | 1581.7450 | 1581.7457 | 0 | 63  | 4 |
| GHFFVEDQIYCEK             | +2 | 807.8679 | 1613.7212 | 1613.7184 | 0 | 57  | 6 |
| QSTSFLVLQEILESEEK         | +2 | 990.5132 | 1979.0118 | 1979.0098 | 0 | 101 | 4 |
| MNLASEPQEV LHIGSAHNR      | +3 | 701.6857 | 2102.0354 | 2102.0327 | 0 | 42  | 2 |
| QELNEPPKQSTSFLVLQEILESEEK | +3 | 972.5021 | 2914.4844 | 2914.4811 | 0 | 53  | 2 |

|          |                                             |                          |            |            |                             |                                 |      |
|----------|---------------------------------------------|--------------------------|------------|------------|-----------------------------|---------------------------------|------|
| No. 142. | Protein                                     | Matched (SEQUEST MASCOT) | Strategy   | Hits       | PepMatched (SEQUEST MASCOT) | SpectraMatched (SEQUEST MASCOT) |      |
|          | IPI00101968                                 | Y Y                      |            | 2 3 4 5 18 |                             |                                 |      |
| *Des:    | Splice Isoform 3 of Drebrin-like protein    |                          |            |            |                             |                                 |      |
|          | SEQUEST:(PepMatched Observed.Hits Coverage) |                          |            | 3          | 2                           | 12.08%                          |      |
|          | Seq                                         | Charge                   | Xcor       | Delta      | Proability                  | PepHits                         |      |
|          | AEEDVEPECIMEK                               | +2                       |            | 3.616      | 0.410                       | 0.9907 6                        |      |
|          | SPTDWALFTYEGNSDIR                           | +2                       |            | 4.057      | 0.358                       | 0.9820 1                        |      |
|          | VAGTGEGGLEEMVEELNSGK                        | +2                       |            | 5.137      | 0.607                       | 1.0000 3                        |      |
|          | MASCOT:(PepMatched Observed.Hits Coverage)  |                          |            | 4          | 4                           | 13.87%                          |      |
|          | Seq                                         | Charge                   | ObservedMS | ExpectedMS | CalculatedMS                | Pepscore PepHits                |      |
|          | NGPALQEAYVR                                 | +2                       | 609.3503   | 1216.6860  | 1216.6200 0.07              | 54 3                            |      |
|          | TWEQQQEVVSR                                 | +2                       | 695.3856   | 1388.7566  | 1388.6684 0.09              | 70 6                            |      |
|          | FQDVGPQAPVGSVYQK                            | +2                       |            | 860.5007   | 1718.9868                   | 1718.8627 0.12                  | 58 3 |
|          | VAGTGEGGLEEMVEELNSGK                        | +2                       |            | 1003.5264  | 2005.0382                   | 2004.9309 0.11                  | 63 3 |

|          |                                             |                          |            |             |                             |                                 |      |
|----------|---------------------------------------------|--------------------------|------------|-------------|-----------------------------|---------------------------------|------|
| No. 143. | Protein                                     | Matched (SEQUEST MASCOT) | Strategy   | Hits        | PepMatched (SEQUEST MASCOT) | SpectraMatched (SEQUEST MASCOT) |      |
|          | IPI00216171                                 | Y Y                      |            | 1 3 3 11 15 |                             |                                 |      |
| *Des:    | Gamma enolase                               |                          |            |             |                             |                                 |      |
|          | SEQUEST:(PepMatched Observed.Hits Coverage) |                          |            | 3           | 3                           | 16.32%                          |      |
|          | Seq                                         | Charge                   | Xcor       | Delta       | Proability                  | PepHits                         |      |
|          | DATNVGDEGGFAPNILENSEALELVK                  | +2                       |            | 4.747       | 0.650                       | 1.0000 4                        |      |
|          | DYPVVSIEDPFDQDDWAAWSK                       | +3                       |            | 5.538       | 0.626                       | 1.0000 5                        |      |
|          | SGETEDTFIADLVVGLCTGQIK                      | +2                       |            | 4.787       | 0.661                       | 1.0000 2                        |      |
|          | MASCOT:(PepMatched Observed.Hits Coverage)  |                          |            | 3           | 2                           | 16.32%                          |      |
|          | Seq                                         | Charge                   | ObservedMS | ExpectedMS  | CalculatedMS                | Pepscore PepHits                |      |
|          | DYPVVSIEDPFDQDDWAAWSK                       | +2                       |            | 1242.0569   | 2482.0992                   | 2482.0965 0                     | 91 5 |
|          | DATNVGDEGGFAPNILENSEALELVK                  | +2                       |            | 1351.6650   | 2701.3155                   | 2701.3082 0.01                  | 89 8 |
|          | SGETEDTFIADLVVGLCTGQIK                      | +2                       |            | 1148.5812   | 2295.1478                   | 2295.1304 0.02                  | 67 4 |

|          |                                             |                          |            |            |                             |                                 |
|----------|---------------------------------------------|--------------------------|------------|------------|-----------------------------|---------------------------------|
| No. 144. | Protein                                     | Matched (SEQUEST MASCOT) | Strategy   | Hits       | PepMatched (SEQUEST MASCOT) | SpectraMatched (SEQUEST MASCOT) |
|          | IPI00299571                                 | Y Y                      |            | 2 2 7 3 7  |                             |                                 |
| *Des:    | Hypothetical protein FLJ45525               |                          |            |            |                             |                                 |
|          | SEQUEST:(PepMatched Observed.Hits Coverage) |                          |            | 2          | 1                           | 9.98%                           |
|          | Seq                                         | Charge                   | Xcor       | Delta      | Proability                  | PepHits                         |
|          | DGELPVEDDIDLSDELDDLGKDE                     | +2                       |            | 5.336      | 0.505                       | 0.9560 2                        |
|          | ALDLFSDNAPPELLEIINEDIAK                     | +3                       |            | 4.459      | 0.543                       | 0.9986 2                        |
|          | MASCOT:(PepMatched Observed.Hits Coverage)  |                          |            | 7          | 1                           | 22.95%                          |
|          | Seq                                         | Charge                   | ObservedMS | ExpectedMS | CalculatedMS                | Pepscore PepHits                |
|          | GESPVDYDGGRR                                | +2                       | 576.3106   | 1150.6066  | 1150.4890 0.12              | 55 1                            |
|          | TGEAIVDAALSALR                              | +2                       | 693.9147   | 1385.8148  | 1385.7514 0.06              | 110 1                           |
|          | GSFSEQGINEFLR                               | +2                       | 742.3918   | 1482.7690  | 1482.7102 0.06              | 88 1                            |

Identified Human Platelet Proteins

|                         |          |           |           |           |      |    |   |  |
|-------------------------|----------|-----------|-----------|-----------|------|----|---|--|
| NLEPEWAAAASEVK+2        | 757.9346 | 1513.8546 | 1513.7412 | 0.11      | 53   | 1  |   |  |
| LAAVDATVNQVLASR         | +2       | 764.4462  | 1526.8778 | 1526.8416 | 0.04 | 95 | 1 |  |
| GSTAPVGGGAFPTIVER       | +2       | 808.4739  | 1614.9332 | 1614.8365 | 0.1  | 63 | 1 |  |
| ALDLFSDNAPPELLEIINEDIAK | +3       | 879.8572  | 2636.5498 | 2636.3584 | 0.19 | 70 | 2 |  |

|          |                                             |                          |               |                            |                                |           |          |         |
|----------|---------------------------------------------|--------------------------|---------------|----------------------------|--------------------------------|-----------|----------|---------|
| No. 145. | Protein                                     | Matched (SEQUEST MASCOT) | Strategy.Hits | PepMatched(SEQUEST MASCOT) | SpectraMatched(SEQUEST MASCOT) |           |          |         |
|          | IPI00216318                                 | Y Y                      | 2             | 4 4                        | 7 13                           |           |          |         |
| *Des:    | 14-3-3 protein beta/alpha                   |                          |               |                            |                                |           |          |         |
|          | SEQUEST:(PepMatched Observed.Hits Coverage) |                          |               | 4                          | 6                              | 20.39%    |          |         |
|          | Seq                                         | Charge                   | Xcor          | Delta                      | Proability                     | PepHits   |          |         |
|          | TAFDEAIAELDTLNEESYK                         | +2                       |               | 4.844                      | 0.599                          | 0.9949    | 1        |         |
|          | TAFDEAIAELDTLNEESYKDSTLIMQLLR               | +3                       |               | 5.734                      | 0.584                          | 1.0000    | 2        |         |
|          | IEAELQDICNDVLELLDK                          | +2                       |               | 5.475                      | 0.613                          | 1.0000    | 2        |         |
|          | EKIEAELQDICNDVLELLDK                        | +3                       |               | 4.113                      | 0.496                          | 0.9949    | 4        |         |
|          | MASCOT:(PepMatched Observed.Hits Coverage)  |                          |               | 4                          | 9                              | 20.39%    |          |         |
|          | Seq                                         | Charge                   | ObservedMS    | ExpectedMS                 | CalculatedMS                   |           | Pepscore | PepHits |
|          | IEAELQDICNDVLELLDK                          | +2                       |               | 1037.0267                  | 2072.0389                      | 2072.0347 | 0        | 98      |
|          | TAFDEAIAELDTLNEESYK                         | +2                       |               | 1080.0060                  | 2157.9974                      | 2157.9953 | 0        | 96      |
|          | EKIEAELQDICNDVLELLDK                        | +3                       |               | 777.3978                   | 2329.1715                      | 2329.1722 | 0        | 46      |
|          | TAFDEAIAELDTLNEESYKDSTLIMQLLR               | +3                       |               | 1110.5569                  | 3328.6488                      | 3328.6384 | 0.01     | 86      |
|          |                                             |                          |               |                            |                                |           |          | 1       |

|          |                                                             |                          |               |                            |                                |         |   |  |
|----------|-------------------------------------------------------------|--------------------------|---------------|----------------------------|--------------------------------|---------|---|--|
| No. 146. | Protein                                                     | Matched (SEQUEST MASCOT) | Strategy.Hits | PepMatched(SEQUEST MASCOT) | SpectraMatched(SEQUEST MASCOT) |         |   |  |
|          | IPI00002255                                                 | Y N                      | 1             | 2 0                        | 3 0                            |         |   |  |
| *Des:    | Lipopolysaccharide-responsive and beige-like anchor protein |                          |               |                            |                                |         |   |  |
|          | SEQUEST:(PepMatched Observed.Hits Coverage)                 |                          |               | 2                          | 1                              | 1.37%   |   |  |
|          | Seq                                                         | Charge                   | Xcor          | Delta                      | Proability                     | PepHits |   |  |
|          | AEQENQELPDEGTLEETLTNETR                                     | +2                       |               | 3.294                      | 0.485                          | 0.9825  | 1 |  |
|          | SIVEEEEDDYVELK+2                                            |                          | 4.544         | 0.482                      | 0.9916                         | 2       |   |  |
|          | MASCOT:(PepMatched Observed.Hits Coverage)                  |                          |               |                            |                                |         |   |  |

|          |                                             |                          |               |                            |                                |           |          |         |
|----------|---------------------------------------------|--------------------------|---------------|----------------------------|--------------------------------|-----------|----------|---------|
| No. 147. | Protein                                     | Matched (SEQUEST MASCOT) | Strategy.Hits | PepMatched(SEQUEST MASCOT) | SpectraMatched(SEQUEST MASCOT) |           |          |         |
|          | IPI00216319                                 | Y Y                      | 1             | 3 2                        | 8 6                            |           |          |         |
| *Des:    | 14-3-3 protein eta                          |                          |               |                            |                                |           |          |         |
|          | SEQUEST:(PepMatched Observed.Hits Coverage) |                          |               | 3                          | 9                              | 22%       |          |         |
|          | Seq                                         | Charge                   | Xcor          | Delta                      | Proability                     | PepHits   |          |         |
|          | DNLTLWTSQQDEEAGEG                           | +2                       |               | 4.364                      | 0.560                          | 0.9925    | 5        |         |
|          | QAFDDAIAELDTLNEDSYK                         | +2                       |               | 5.010                      | 0.634                          | 1.0000    | 4        |         |
|          | ELETVCNDVLSLLDK                             | +2                       |               | 4.467                      | 0.525                          | 0.9946    | 2        |         |
|          | MASCOT:(PepMatched Observed.Hits Coverage)  |                          |               | 2                          | 3                              | 12%       |          |         |
|          | Seq                                         | Charge                   | ObservedMS    | ExpectedMS                 | CalculatedMS                   |           | Pepscore | PepHits |
|          | QAFDDAIAELDTLNEDSYK                         | +2                       |               | 1079.4941                  | 2156.9737                      | 2156.9749 | 0        | 87      |
|          | QAFDDAIAELDTLNEDSYKDSTLIMQLLR               | +3                       |               | 1110.2167                  | 3327.6282                      | 3327.6180 | 0.01     | 51      |
|          |                                             |                          |               |                            |                                |           |          | 1       |

|          |                                             |                          |               |                            |                                |  |  |  |
|----------|---------------------------------------------|--------------------------|---------------|----------------------------|--------------------------------|--|--|--|
| No. 148. | Protein                                     | Matched (SEQUEST MASCOT) | Strategy.Hits | PepMatched(SEQUEST MASCOT) | SpectraMatched(SEQUEST MASCOT) |  |  |  |
|          | IPI00302925                                 | N Y                      | 1             | 0 8                        | 0 8                            |  |  |  |
| *Des:    | T-complex protein 1, theta subunit          |                          |               |                            |                                |  |  |  |
|          | SEQUEST:(PepMatched Observed.Hits Coverage) |                          |               |                            |                                |  |  |  |

| Identified Human Platelet Proteins |                                             |                          |               |                            |                                |                  |    |    |  |  |
|------------------------------------|---------------------------------------------|--------------------------|---------------|----------------------------|--------------------------------|------------------|----|----|--|--|
| No.                                | Protein                                     | Matched (SEQUEST MASCOT) | Strategy.Hits | PepMatched(SEQUEST MASCOT) | SpectraMatched(SEQUEST MASCOT) |                  |    |    |  |  |
| 149.                               | IPI00302927                                 | N                        | Y             | 1                          | 0                              | 3                | 0  | 3  |  |  |
| *Des:                              | T-complex protein 1, delta subunit          |                          |               |                            |                                |                  |    |    |  |  |
|                                    | SEQUEST:(PepMatched Observed.Hits Coverage) |                          |               |                            |                                |                  |    |    |  |  |
|                                    | MASCOT:(PepMatched Observed.Hits Coverage)  |                          |               |                            |                                |                  |    |    |  |  |
|                                    | Seq                                         | Charge                   | ObservedMS    | ExpectedMS                 | CalculatedMS                   | PepScore PepHits |    |    |  |  |
|                                    | LATNAAVTVLR                                 | +2                       | 564.8645      | 1127.7144                  | 1127.6662                      | 0.05             | 66 | 1  |  |  |
|                                    | FAEAFEAIPIR                                 | +2                       | 575.8333      | 1149.6520                  | 1149.5818                      | 0.07             | 59 | 1  |  |  |
|                                    | LFVTNDAATILR                                | +2                       | 667.4035      | 1332.7924                  | 1332.7401                      | 0.05             | 53 | 1  |  |  |
|                                    | LVPGGGATEIELAK                              | +2                       | 677.9249      | 1353.8352                  | 1353.7503                      | 0.08             | 83 | 1  |  |  |
|                                    | GSTDNLMDIER                                 | +2                       | 683.3488      | 1364.6830                  | 1364.5878                      | 0.1              | 95 | 1  |  |  |
|                                    | AIADTGANVVVTGGK                             | +2                       | 686.9159      | 1371.8172                  | 1371.7357                      | 0.08             | 95 | 1  |  |  |
|                                    | DMLEAGILDITYLGK                             | +2                       | 769.9421      | 1537.8696                  | 1537.7697                      | 0.1              | 97 | 1  |  |  |
|                                    | ILGSGISSSVLHGMVFK                           | +3                       | 607.0348      | 1818.0826                  | 1817.9709                      | 0.11             | 72 | 1  |  |  |
| 150.                               | IPI00184931                                 | N                        | Y             | 1                          | 0                              | 2                | 0  | 6  |  |  |
| *Des:                              | Hypothetical protein DKFZp686K03100         |                          |               |                            |                                |                  |    |    |  |  |
|                                    | SEQUEST:(PepMatched Observed.Hits Coverage) |                          |               |                            |                                |                  |    |    |  |  |
|                                    | MASCOT:(PepMatched Observed.Hits Coverage)  |                          |               |                            |                                |                  |    |    |  |  |
|                                    | Seq                                         | Charge                   | ObservedMS    | ExpectedMS                 | CalculatedMS                   | PepScore PepHits |    |    |  |  |
|                                    | VIDPATATSVDLR                               | +2                       | 679.4085      | 1356.8024                  | 1356.7249                      | 0.08             | 65 | 1  |  |  |
|                                    | DALSDLALHFLNK                               | +2                       | 728.9468      | 1455.8790                  | 1455.7721                      | 0.11             | 54 | 1  |  |  |
|                                    | ALIAGGGAPEIELALR                            | +2                       | 775.9853      | 1549.9560                  | 1549.8827                      | 0.07             | 58 | 1  |  |  |
| 151.                               | IPI00465436                                 | N                        | Y             | 1                          | 0                              | 10               | 0  | 12 |  |  |
| *Des:                              | Catalase                                    |                          |               |                            |                                |                  |    |    |  |  |
|                                    | SEQUEST:(PepMatched Observed.Hits Coverage) |                          |               |                            |                                |                  |    |    |  |  |
|                                    | MASCOT:(PepMatched Observed.Hits Coverage)  |                          |               |                            |                                |                  |    |    |  |  |
|                                    | Seq                                         | Charge                   | ObservedMS    | ExpectedMS                 | CalculatedMS                   | PepScore PepHits |    |    |  |  |
|                                    | DLFNAIATGK                                  | +2                       | 525.3157      | 1048.6168                  | 1048.5553                      | 0.06             | 52 | 1  |  |  |
|                                    | LSQEDPDYGIK                                 | +2                       | 646.8488      | 1291.6830                  | 1291.6044                      | 0.08             | 36 | 1  |  |  |
|                                    | ADVLTTGAGNPVGDK                             | +2                       | 707.9081      | 1413.8016                  | 1413.7099                      | 0.09             | 68 | 1  |  |  |
|                                    | AFYVNVLNNEEQR                               | +2                       | 741.4169      | 1480.8192                  | 1480.7310                      | 0.09             | 90 | 1  |  |  |
|                                    | FSTVAGESGSADTVR                             | +2                       | 742.4052      | 1482.7958                  | 1482.6950                      | 0.1              | 39 | 1  |  |  |
|                                    | FNTANDDNVTQVR                               | +2                       | 747.4069      | 1492.7992                  | 1492.6906                      | 0.11             | 71 | 2  |  |  |
|                                    | NAIHTFVQSGSHLAAR                            | +3                       | 570.3340      | 1707.9802                  | 1707.8804                      | 0.1              | 56 | 1  |  |  |
|                                    | GAGAFGYFEVTHDITK                            | +3                       | 571.6524      | 1711.9354                  | 1711.8205                      | 0.11             | 57 | 2  |  |  |
|                                    | GPLLVDVFTDEMAHFDR                           | +3                       | 730.4099      | 2188.2079                  | 2188.0622                      | 0.15             | 70 | 1  |  |  |
|                                    | ADVLTTGAGNPVGDKLNIVITVGPR                   | +3                       | 788.8188      | 2363.4346                  | 2363.2808                      | 0.15             | 49 | 1  |  |  |

**Identified Human Platelet Proteins**

|              |                                             |                                 |                      |                                   |                                       |           |          |         |   |
|--------------|---------------------------------------------|---------------------------------|----------------------|-----------------------------------|---------------------------------------|-----------|----------|---------|---|
| <b>No.</b>   | <b>Protein</b>                              | <b>Matched (SEQUEST MASCOT)</b> | <b>Strategy.Hits</b> | <b>PepMatched(SEQUEST MASCOT)</b> | <b>SpectraMatched(SEQUEST MASCOT)</b> |           |          |         |   |
| 152.         | IPI00465439                                 | Y Y                             | 1                    | 4                                 | 3                                     | 5         | 8        |         |   |
| <b>*Des:</b> | Fructose-bisphosphate aldolase A            |                                 |                      |                                   |                                       |           |          |         |   |
|              | SEQUEST:(PepMatched Observed.Hits Coverage) |                                 |                      | 4                                 | 1                                     | 15.94%    |          |         |   |
|              | Seq                                         | Charge                          | Xcor                 | Delta                             | Probility                             | PepHits   |          |         |   |
|              | IVAPGKGILAADESTGSIK                         |                                 |                      | +3                                | 3.609                                 | 0.533     | 0.9982   | 2       |   |
|              | YTPSGQAGAAASESLFVSNHA                       |                                 |                      | +2                                | 3.859                                 | 0.525     | 0.9724   | 1       |   |
|              | IVAPGKGILAADESTGSIKR                        |                                 |                      | +3                                | 3.016                                 | 0.562     | 0.9979   | 7       |   |
|              | ALQASALKAWGGKK                              |                                 |                      | +2                                | 3.123                                 | 0.638     | 0.9796   | 3       |   |
|              | MASCOT:(PepMatched Observed.Hits Coverage)  |                                 |                      | 3                                 | 1                                     | 14.86%    |          |         |   |
|              | Seq                                         | Charge                          | ObservedMS           | ExpectedMS                        | CalculatedMS                          |           | Pepscore | PepHits |   |
|              | IVAPGKGILAADESTGSIKR                        |                                 | +3                   | 685.3924                          | 2053.1554                             | 2053.1531 | 0        | 59      | 7 |
|              | LQSIGTENTEENRRFYR                           |                                 | +3                   | 705.0204                          | 2112.0395                             | 2112.0348 | 0        | 46      | 4 |
|              | ALQASALKAWGGKK                              |                                 | +2                   | 714.9204                          | 1427.8263                             | 1427.8248 | 0        | 50      | 3 |

|              |                                             |                                 |                      |                                   |                                       |           |          |         |   |  |  |
|--------------|---------------------------------------------|---------------------------------|----------------------|-----------------------------------|---------------------------------------|-----------|----------|---------|---|--|--|
| <b>No.</b>   | <b>Protein</b>                              | <b>Matched (SEQUEST MASCOT)</b> | <b>Strategy.Hits</b> | <b>PepMatched(SEQUEST MASCOT)</b> | <b>SpectraMatched(SEQUEST MASCOT)</b> |           |          |         |   |  |  |
| 153.         | IPI00550234                                 | N Y                             | 1                    | 0                                 | 3                                     | 0         | 15       |         |   |  |  |
| <b>*Des:</b> | Actin-related protein 2/3 complex subunit 5 |                                 |                      |                                   |                                       |           |          |         |   |  |  |
|              | SEQUEST:(PepMatched Observed.Hits Coverage) |                                 |                      |                                   |                                       |           |          |         |   |  |  |
|              | MASCOT:(PepMatched Observed.Hits Coverage)  |                                 |                      | 3                                 | 1                                     | 23.52%    |          |         |   |  |  |
|              | Seq                                         | Charge                          | ObservedMS           | ExpectedMS                        | CalculatedMS                          |           | Pepscore | PepHits |   |  |  |
|              | FVDEEDGGDQGAGPDEGEVDSCLR                    |                                 | +2                   | 1248.5122                         | 2495.0099                             | 2495.0030 | 0.01     | 87      | 2 |  |  |
|              | VDVDEYDENKFVDEEDGGDQGAGPDEGEVDSCLR          |                                 | +3                   | 1234.8451                         | 3701.5135                             | 3701.5070 | 0.01     | 90      | 8 |  |  |
|              | KVDVDEYDENKFVDEEDGGDQGAGPDEGEVDSCLR         |                                 | +3                   | 1277.5420                         | 3829.6041                             | 3829.6019 | 0        | 86      | 7 |  |  |

|              |                                             |                                 |                      |                                   |                                       |           |          |         |   |  |  |
|--------------|---------------------------------------------|---------------------------------|----------------------|-----------------------------------|---------------------------------------|-----------|----------|---------|---|--|--|
| <b>No.</b>   | <b>Protein</b>                              | <b>Matched (SEQUEST MASCOT)</b> | <b>Strategy.Hits</b> | <b>PepMatched(SEQUEST MASCOT)</b> | <b>SpectraMatched(SEQUEST MASCOT)</b> |           |          |         |   |  |  |
| 154.         | IPI00004436                                 | N Y                             | 1                    | 0                                 | 2                                     | 0         | 4        |         |   |  |  |
| <b>*Des:</b> | U6 snRNA-associated Sm-like protein LSm1    |                                 |                      |                                   |                                       |           |          |         |   |  |  |
|              | SEQUEST:(PepMatched Observed.Hits Coverage) |                                 |                      |                                   |                                       |           |          |         |   |  |  |
|              | MASCOT:(PepMatched Observed.Hits Coverage)  |                                 |                      | 2                                 | 1                                     | 25%       |          |         |   |  |  |
|              | Seq                                         | Charge                          | ObservedMS           | ExpectedMS                        | CalculatedMS                          |           | Pepscore | PepHits |   |  |  |
|              | ESDTPLQQVSIEEILEEQR                         |                                 | +2                   | 1122.0582                         | 2242.1019                             | 2242.0964 | 0.01     | 92      | 1 |  |  |
|              | GENVLLGEIDLEKESDTPLQQVSIEEILEEQR            |                                 | +3                   | 1251.3131                         | 3750.9175                             | 3750.9050 | 0.01     | 74      | 3 |  |  |

|              |                                             |                                 |                      |                                   |                                       |           |          |         |   |  |
|--------------|---------------------------------------------|---------------------------------|----------------------|-----------------------------------|---------------------------------------|-----------|----------|---------|---|--|
| <b>No.</b>   | <b>Protein</b>                              | <b>Matched (SEQUEST MASCOT)</b> | <b>Strategy.Hits</b> | <b>PepMatched(SEQUEST MASCOT)</b> | <b>SpectraMatched(SEQUEST MASCOT)</b> |           |          |         |   |  |
| 155.         | IPI00011654                                 | Y Y                             | 2                    | 2                                 | 16                                    | 3         | 521      |         |   |  |
| <b>*Des:</b> | Tubulin beta-2 chain                        |                                 |                      |                                   |                                       |           |          |         |   |  |
|              | SEQUEST:(PepMatched Observed.Hits Coverage) |                                 |                      | 2                                 | 1                                     | 10.17%    |          |         |   |  |
|              | Seq                                         | Charge                          | Xcor                 | Delta                             | Probility                             | PepHits   |          |         |   |  |
|              | FWEVISDEHGIDPTGTYHGSDLQLDR                  |                                 |                      | +3                                | 6.014                                 | 0.554     | 0.9987   | 2       |   |  |
|              | MAVTFIGNSTAIQELFK                           |                                 |                      | +2                                | 4.497                                 | 0.549     | 0.9963   | 1       |   |  |
|              | MASCOT:(PepMatched Observed.Hits Coverage)  |                                 |                      | 16                                | 4                                     | 54.64%    |          |         |   |  |
|              | Seq                                         | Charge                          | ObservedMS           | ExpectedMS                        | CalculatedMS                          |           | Pepscore | PepHits |   |  |
|              | YLTVAAVFR                                   |                                 | +2                   | 520.3311                          | 1038.6476                             | 1038.5862 | 0.06     | 53      | 1 |  |
|              | ISVYYNEATGGK                                |                                 | +2                   | 651.3611                          | 1300.7076                             | 1300.6299 | 0.08     | 69      | 2 |  |
|              | ALTVPELTQQVFDK                              |                                 | +2                   | 830.5120                          | 1659.0094                             | 1658.8879 | 0.12     | 61      | 7 |  |
|              | NSSYFVEWIPNNVK                              |                                 | +2                   | 848.9172                          | 1695.8198                             | 1695.8256 | 0        | 50      | 1 |  |

Identified Human Platelet Proteins

|                            |    |          |           |           |      |     |     |
|----------------------------|----|----------|-----------|-----------|------|-----|-----|
| LTTPTYGDLNHLVSATMSGVTTCLR  | +3 | 884.5090 | 2650.5052 | 2650.3094 | 0.2  | 52  | 1   |
| FWEVISDEHGIDPTGTYHGSDLQLDR | +4 | 776.3942 | 3101.5477 | 3101.4002 | 0.15 | 48  | 3   |
| EVDEQMLNVQNK               | +2 | 723.8764 | 1445.7382 | 1445.6820 | 0.06 | 54  | 5   |
| GHYTEGAELVDSVLDVVR         | +2 | 980.0377 | 1958.0608 | 1957.9744 | 0.09 | 122 | 19  |
| ISEQFTAMFR                 | +2 | 615.3266 | 1228.6386 | 1228.5910 | 0.05 | 75  | 106 |
| IMNTFSVVPSPK               | +2 | 660.3947 | 1318.7748 | 1318.6955 | 0.08 | 97  | 47  |
| MAVTFIGNSTAIQELFK          | +2 | 935.5192 | 1869.0238 | 1868.9706 | 0.05 | 81  | 3   |
| SGPFGQIFRPDNFVFGQSGAGNNWAK | +3 | 933.4962 | 2797.4668 | 2797.3360 | 0.13 | 73  | 11  |
| LHFFMPGFAPLTSR             | +2 | 810.9268 | 1619.8390 | 1619.8282 | 0.01 | 42  | 7   |
| FPGQLNADLR                 | +2 | 565.8220 | 1129.6294 | 1129.5880 | 0.04 | 75  | 276 |
| LAVNMVPFPR                 | +2 | 572.3631 | 1142.7116 | 1142.6270 | 0.08 | 67  | 199 |
| FPGQLNADLRK                | +2 | 629.8907 | 1257.7668 | 1257.6829 | 0.08 | 43  | 45  |

No. 156. Protein IPI00556624 Matched (SEQUEST MASCOT) N Y Strategy.Hits 1 PepMatched(SEQUEST MASCOT) 0 SpectraMatched(SEQUEST MASCOT) 16

\*Des: Keratin 1

SEQUEST:(PepMatched Observed.Hits Coverage)

MASCOT:(PepMatched Observed.Hits Coverage) 16 1 26.41%

| Seq                    | Charge | ObservedMS | ExpectedMS | CalculatedMS | Pepscore | PepHits |
|------------------------|--------|------------|------------|--------------|----------|---------|
| SLVNLGGSK              | +2     | 437.7530   | 873.4915   | 873.4919     | 0        | 67      |
| YEELQITAGR             | +2     | 590.3034   | 1178.5923  | 1178.5931    | 0        | 79      |
| SLDLDSIIAEVK           | +2     | 651.8610   | 1301.7074  | 1301.7078    | 0        | 106     |
| SLVNLGGSKISISVAR       | +2     | 844.4912   | 1686.9679  | 1686.9628    | 0.01     | 112     |
| GSGGGSSGGSIGGRGSSSGGVK | +3     | 584.6128   | 1750.8166  | 1750.8193    | 0        | 71      |
| GSGGGSSGGSIGGR         | +2     | 546.7557   | 1091.4969  | 1091.4955    | 0        | 53      |
| AEAESLYQSK             | +2     | 563.2737   | 1124.5329  | 1124.5349    | 0        | 59      |
| NKYEDEINKR             | +2     | 654.8300   | 1307.6455  | 1307.6469    | 0        | 52      |
| SKAEAESLYQSK           | +2     | 670.8395   | 1339.6644  | 1339.6619    | 0        | 58      |
| TNAENEFVTIKK           | +2     | 697.3696   | 1392.7247  | 1392.7248    | 0        | 71      |
| THNLEPYFESFINNLR       | +3     | 665.3341   | 1992.9805  | 1992.9693    | 0.01     | 66      |
| FLEQQNQVLQTK           | +2     | 738.3970   | 1474.7794  | 1474.7780    | 0        | 81      |
| SLNNQFASFIDKVR         | +2     | 819.9350   | 1637.8554  | 1637.8525    | 0        | 71      |
| SGGGFSSGSAGIINYQR      | +2     | 829.4011   | 1656.7877  | 1656.7855    | 0        | 78      |
| SKAEAESLYQSKYEELQITAGR | +3     | 834.4229   | 2500.2469  | 2500.2445    | 0        | 60      |
| SLDLDSIIAEVKAQYEDIAQK  | +3     | 783.7451   | 2348.2133  | 2348.2111    | 0        | 95      |

No. 157. Protein IPI00430844 Matched (SEQUEST MASCOT) N Y Strategy.Hits 1 PepMatched(SEQUEST MASCOT) 2 SpectraMatched(SEQUEST MASCOT) 0

\*Des: Hypothetical protein

SEQUEST:(PepMatched Observed.Hits Coverage)

MASCOT:(PepMatched Observed.Hits Coverage) 2 1 5.97%

| Seq               | Charge | ObservedMS | ExpectedMS | CalculatedMS | Pepscore | PepHits |
|-------------------|--------|------------|------------|--------------|----------|---------|
| WLQGSQELPR        | +2     | 607.3571   | 1212.6996  | 1212.6251    | 0.07     | 77      |
| QEPSQGTTFVAVTSILR | +2     | 918.5314   | 1835.0482  | 1834.9425    | 0.11     | 52      |

No. 158. Protein IPI00398786 Matched (SEQUEST MASCOT) N Y Strategy.Hits 1 PepMatched(SEQUEST MASCOT) 2 SpectraMatched(SEQUEST MASCOT) 0



Identified Human Platelet Proteins

|          |                                                         |                          |               |                            |                                |           |           |        |          |         |
|----------|---------------------------------------------------------|--------------------------|---------------|----------------------------|--------------------------------|-----------|-----------|--------|----------|---------|
| *Des:    | Splice Isoform 2 of Protein C14orf133                   |                          |               |                            |                                |           |           |        |          |         |
|          | SEQUEST:(PepMatched Observed.Hits Coverage)             |                          |               |                            |                                |           |           |        |          |         |
|          | MASCOT:(PepMatched Observed.Hits Coverage) 2 2 6.14%    |                          |               |                            |                                |           |           |        |          |         |
|          | Seq                                                     | Charge                   | ObservedMS    | ExpectedMS                 | CalculatedMS                   |           |           |        | Pepscore | PepHits |
|          | DFVDDDDDDDLER                                           | +2                       | 792.3024      | 1582.5902                  | 1582.5907                      | 0         | 42        | 4      |          |         |
|          | AFTFDDDEDELSQLK                                         | +2                       |               | 886.8995                   | 1771.7845                      | 1771.7788 | 0.01      | 83     | 2        |         |
| No. 159. | Protein                                                 | Matched (SEQUEST MASCOT) | Strategy.Hits | PepMatched(SEQUEST MASCOT) | SpectraMatched(SEQUEST MASCOT) |           |           |        |          |         |
|          | IPI00305692                                             | Y Y                      | 1             | 2 3                        | 3 6                            |           |           |        |          |         |
| *Des:    | Thioredoxin-like protein 1                              |                          |               |                            |                                |           |           |        |          |         |
|          | SEQUEST:(PepMatched Observed.Hits Coverage) 2 1 13.65%  |                          |               |                            |                                |           |           |        |          |         |
|          | Seq                                                     | Charge                   | Xcor          | Delta                      | Proability                     | PepHits   |           |        |          |         |
|          | SEPTQALELTEDDIKEDGIVPLR                                 |                          |               |                            | +2                             | 5.140     | 0.558     | 0.9701 | 5        |         |
|          | IDQYQGADAVGLEEK                                         | +2                       |               |                            | 3.422                          | 0.355     | 0.9733    | 2      |          |         |
|          | MASCOT:(PepMatched Observed.Hits Coverage) 3 1 17.06%   |                          |               |                            |                                |           |           |        |          |         |
|          | Seq                                                     | Charge                   | ObservedMS    | ExpectedMS                 | CalculatedMS                   |           |           |        | Pepscore | PepHits |
|          | SMDFEEAER                                               | +2                       | 557.2291      | 1112.4436                  | 1112.4444                      | 0         | 43        | 1      |          |         |
|          | IDQYQGADAVGLEEK                                         | +2                       |               | 818.3973                   | 1634.7801                      | 1634.7787 | 0         | 47     | 2        |         |
|          | SEPTQALELTEDDIKEDGIVPLR                                 | +2                       |               |                            | 1284.6539                      | 2567.2933 | 2567.2966 | 0      | 84       | 5       |
| No. 160. | Protein                                                 | Matched (SEQUEST MASCOT) | Strategy.Hits | PepMatched(SEQUEST MASCOT) | SpectraMatched(SEQUEST MASCOT) |           |           |        |          |         |
|          | IPI00296099                                             | Y Y                      | 2             | 9 14                       | 15 26                          |           |           |        |          |         |
| *Des:    | Thrombospondin 1 precursor                              |                          |               |                            |                                |           |           |        |          |         |
|          | SEQUEST:(PepMatched Observed.Hits Coverage) 9 8 12.68%  |                          |               |                            |                                |           |           |        |          |         |
|          | Seq                                                     | Charge                   | Xcor          | Delta                      | Proability                     | PepHits   |           |        |          |         |
|          | SITLFVQEDR                                              | +2                       |               | 3.373                      | 0.342                          | 0.9750    | 4         |        |          |         |
|          | GGVNDNFQGV LQNV R                                       | +2                       |               |                            | 3.416                          | 0.468     | 0.9870    | 2      |          |         |
|          | TIVTTLQDSIR                                             | +2                       |               | 3.148                      | 0.519                          | 0.9922    | 2         |        |          |         |
|          | QHVVSVEEALLATGQWK                                       | +2                       |               |                            | 4.017                          | 0.636     | 0.9969    | 3      |          |         |
|          | DDFDHDSVPDIDDICPENVDISETDFR                             | +3                       |               |                            |                                | 4.802     | 0.372     | 0.9917 | 2        |         |
|          | IEDANLIPPVPDDKFDLVDVAVR                                 | +3                       |               |                            |                                | 4.273     | 0.582     | 0.9908 | 2        |         |
|          | GFLLLASLR                                               | +2                       |               | 2.763                      | 0.517                          | 0.9904    | 1         |        |          |         |
|          | LGLFVFSQEMVFFSDLK                                       | +2                       |               |                            | 3.701                          | 0.546     | 0.9943    | 2      |          |         |
|          | QVTQSYWDTNPTR                                           | +2                       |               | 3.023                      | 0.518                          | 0.9893    | 2         |        |          |         |
|          | MASCOT:(PepMatched Observed.Hits Coverage) 14 11 17.98% |                          |               |                            |                                |           |           |        |          |         |
|          | Seq                                                     | Charge                   | ObservedMS    | ExpectedMS                 | CalculatedMS                   |           |           |        | Pepscore | PepHits |
|          | TIVTTLQDSIR                                             | +2                       | 623.8793      | 1245.7440                  | 1245.6929                      | 0.05      | 71        | 2      |          |         |
|          | GTSQNPNWVVR                                             | +2                       | 686.8873      | 1371.7600                  | 1371.6531                      | 0.11      | 61        | 2      |          |         |
|          | TIVTTLQDSIRK                                            | +2                       | 687.9412      | 1373.8678                  | 1373.7878                      | 0.08      | 56        | 1      |          |         |
|          | FVFGTTPEDILR                                            | +2                       | 697.9120      | 1393.8094                  | 1393.7241                      | 0.09      | 50        | 1      |          |         |
|          | VTEENKELANELR                                           | +2                       | 772.9594      | 1543.9042                  | 1543.7841                      | 0.12      | 87        | 2      |          |         |
|          | NALWHTGNTPGQVR                                          | +2                       |               | 775.9484                   | 1549.8822                      | 1549.7749 | 0.11      | 45     | 2        |         |
|          | KDHSGQVFSVVSNGK                                         | +2                       |               | 794.9709                   | 1587.9272                      | 1587.8004 | 0.13      | 51     | 9        |         |
|          | QVTQSYWDTNPTR                                           | +2                       | 798.4141      | 1594.8136                  | 1594.7376                      | 0.08      | 45        | 1      |          |         |
|          | GGVNDNFQGV LQNV R                                       | +2                       |               |                            | 808.9174                       | 1615.8202 | 1615.8066 | 0.01   | 100      | 3       |
|          | MENAELDVPIQSVFTR                                        | +2                       |               |                            | 924.9875                       | 1847.9604 | 1847.9087 | 0.05   | 66       | 1       |
|          | FTGSQPFQGV E HATANK                                     | +3                       |               |                            | 625.9941                       | 1874.9605 | 1874.8911 | 0.07   | 53       | 3       |

Identified Human Platelet Proteins

|                         |    |           |           |           |      |    |    |
|-------------------------|----|-----------|-----------|-----------|------|----|----|
| QHVSVEEALLATGQWK        | +2 | 948.0655  | 1894.1164 | 1893.9948 | 0.12 | 81 | 2  |
| IPESGGDNSVDFIFELTGAAR   | +2 | 1098.1025 | 2194.1904 | 2194.0541 | 0.14 | 87 | 1  |
| IEDANLIPPVPDDKFQDLVDAVR | +3 | 860.4734  | 2578.3984 | 2578.3278 | 0.07 | 47 | 10 |

No. 161. Protein IPI00299145 Matched (SEQUEST MASCOT) Y N Strategy.Hits 1 2 PepMatched(SEQUEST MASCOT) 0 5 SpectraMatched(SEQUEST MASCOT) 0

\*Des: Keratin, type II cytoskeletal 6E

|                                             |           |         |                |
|---------------------------------------------|-----------|---------|----------------|
| SEQUEST:(PepMatched Observed.Hits Coverage) | 2         | 1       | 4.71%          |
| Seq Charge Xcor Delta                       | Probility | PepHits |                |
| AIGGGLSSVGGGSSTIK                           | +2        | 3.939   | 0.701 1.0000 5 |
| AIGGGLSSVGGGSSTIKYTTTSSSSR                  | +3        | 3.128   | 0.592 0.9985 5 |
| MASCOT:(PepMatched Observed.Hits Coverage)  |           |         |                |

No. 162. Protein IPI00008219 Matched (SEQUEST MASCOT) Y N Strategy.Hits 1 2 PepMatched(SEQUEST MASCOT) 0 5 SpectraMatched(SEQUEST MASCOT) 0

\*Des: UV excision repair protein RAD23 homolog A

|                                             |           |         |                |
|---------------------------------------------|-----------|---------|----------------|
| SEQUEST:(PepMatched Observed.Hits Coverage) | 2         | 1       | 12.43%         |
| Seq Charge Xcor Delta                       | Probility | PepHits |                |
| NENLAANFLLSQNFDD                            | +2        | 4.399   | 0.546 0.9739 2 |
| EEDAASTLVTGSEYETMLTEIMSMGYER                | +2        | 4.343   | 0.704 1.0000 3 |
| MASCOT:(PepMatched Observed.Hits Coverage)  |           |         |                |

No. 163. Protein IPI00384016 Matched (SEQUEST MASCOT) N Y Strategy.Hits 1 0 PepMatched(SEQUEST MASCOT) 2 0 SpectraMatched(SEQUEST MASCOT) 4

\*Des: Full-length cDNA 5-PRIME end of clone CS0DJ009YL13 of T cells

|                                             |            |              |                               |
|---------------------------------------------|------------|--------------|-------------------------------|
| SEQUEST:(PepMatched Observed.Hits Coverage) |            |              |                               |
| MASCOT:(PepMatched Observed.Hits Coverage)  | 2          | 1            | 9.5%                          |
| Seq Charge ObservedMS                       | ExpectedMS | CalculatedMS | Pepscore PepHits              |
| VEGGTPLFTLR                                 | +2         | 595.3719     | 1188.7292 1188.6502 0.08 39 2 |
| TPAFAESVTEGDVR                              | +2         | 739.9114     | 1477.8082 1477.7048 0.1 88 2  |

No. 164. Protein IPI00021854 Matched (SEQUEST MASCOT) Y Y Strategy.Hits 1 3 PepMatched(SEQUEST MASCOT) 3 10 SpectraMatched(SEQUEST MASCOT) 13

\*Des: Apolipoprotein A-II precursor

|                                             |            |              |                             |
|---------------------------------------------|------------|--------------|-----------------------------|
| SEQUEST:(PepMatched Observed.Hits Coverage) | 3          | 1            | 45.09%                      |
| Seq Charge Xcor Delta                       | Probility  | PepHits      |                             |
| AGTELVNFLSYFVELGTQPAT                       | +3         | 3.963        | 0.650 1.0000 5              |
| VKSPELQAEAK                                 | +2         | 3.539        | 0.529 0.9778 4              |
| SKEQLTPLIKK                                 | +2         | 3.395        | 0.512 0.9747 14             |
| MASCOT:(PepMatched Observed.Hits Coverage)  | 3          | 1            | 23.52%                      |
| Seq Charge ObservedMS                       | ExpectedMS | CalculatedMS | Pepscore PepHits            |
| VKSPELQAEAK                                 | +2         | 600.3345     | 1198.6545 1198.6557 0 64 3  |
| SKEQLTPLIKK                                 | +2         | 642.8974     | 1283.7802 1283.7813 0 64 12 |
| SKEQLTPLIK                                  | +2         | 578.8481     | 1155.6817 1155.6863 0 41 6  |

No. 165. Protein IPI00220709 Matched (SEQUEST MASCOT) N Y Strategy.Hits 1 0 PepMatched(SEQUEST MASCOT) 2 0 SpectraMatched(SEQUEST MASCOT) 10

**Identified Human Platelet Proteins**

|              |                                                              |                                 |                      |                                   |                                       |                |      |     |                 |                |
|--------------|--------------------------------------------------------------|---------------------------------|----------------------|-----------------------------------|---------------------------------------|----------------|------|-----|-----------------|----------------|
| <b>*Des:</b> | <b>Splice Isoform 2 of Tropomyosin beta chain</b>            |                                 |                      |                                   |                                       |                |      |     |                 |                |
|              | <b>SEQUEST:(PepMatched Observed.Hits Coverage)</b>           |                                 |                      |                                   |                                       |                |      |     |                 |                |
|              | <b>MASCOT:(PepMatched Observed.Hits Coverage)</b> 2 1 8.3%   |                                 |                      |                                   |                                       |                |      |     |                 |                |
|              | <b>Seq</b>                                                   | <b>Charge</b>                   | <b>ObservedMS</b>    | <b>ExpectedMS</b>                 | <b>CalculatedMS</b>                   |                |      |     | <b>PepScore</b> | <b>PepHits</b> |
|              | TIDDLEETLASAK                                                | +2                              | 703.3558             | 1404.6970                         | 1404.6984                             | 0              | 62   | 6   |                 |                |
|              | MELQEMQLK                                                    | +2                              | 575.2849             | 1148.5553                         | 1148.5569                             | 0              | 44   | 4   |                 |                |
| <b>No.</b>   | <b>Protein</b>                                               | <b>Matched (SEQUEST MASCOT)</b> | <b>Strategy.Hits</b> | <b>PepMatched(SEQUEST MASCOT)</b> | <b>SpectraMatched(SEQUEST MASCOT)</b> |                |      |     |                 |                |
| 166.         | IPI00383071                                                  | N Y                             | 1                    | 0 2                               | 0 10                                  |                |      |     |                 |                |
| <b>*Des:</b> | <b>PREDICTED: similar to Triosephosphate isomerase (TIM)</b> |                                 |                      |                                   |                                       |                |      |     |                 |                |
|              | <b>SEQUEST:(PepMatched Observed.Hits Coverage)</b>           |                                 |                      |                                   |                                       |                |      |     |                 |                |
|              | <b>MASCOT:(PepMatched Observed.Hits Coverage)</b> 2 1 12.99% |                                 |                      |                                   |                                       |                |      |     |                 |                |
|              | <b>Seq</b>                                                   | <b>Charge</b>                   | <b>ObservedMS</b>    | <b>ExpectedMS</b>                 | <b>CalculatedMS</b>                   |                |      |     | <b>PepScore</b> | <b>PepHits</b> |
|              | VVLAYEPVWAIGTGK                                              |                                 | +2                   | 801.9481                          | 1601.8817                             | 1601.8817      | 0    | 69  | 6               |                |
|              | VTNGAFTGEISPGMIK                                             |                                 | +2                   | 811.9092                          | 1621.8038                             | 1620.8181      | 0.99 | 55  | 4               |                |
| <b>No.</b>   | <b>Protein</b>                                               | <b>Matched (SEQUEST MASCOT)</b> | <b>Strategy.Hits</b> | <b>PepMatched(SEQUEST MASCOT)</b> | <b>SpectraMatched(SEQUEST MASCOT)</b> |                |      |     |                 |                |
| 167.         | IPI00007277                                                  | N Y                             | 2                    | 0 2                               | 0 6                                   |                |      |     |                 |                |
| <b>*Des:</b> | <b>LRR FLI-I interacting protein 2</b>                       |                                 |                      |                                   |                                       |                |      |     |                 |                |
|              | <b>SEQUEST:(PepMatched Observed.Hits Coverage)</b>           |                                 |                      |                                   |                                       |                |      |     |                 |                |
|              | <b>MASCOT:(PepMatched Observed.Hits Coverage)</b> 2 2 5.58%  |                                 |                      |                                   |                                       |                |      |     |                 |                |
|              | <b>Seq</b>                                                   | <b>Charge</b>                   | <b>ObservedMS</b>    | <b>ExpectedMS</b>                 | <b>CalculatedMS</b>                   |                |      |     | <b>PepScore</b> | <b>PepHits</b> |
|              | DVIEEQEEQMAEFYR                                              |                                 | +2                   | 958.4235                          | 1914.8325                             | 1914.8305      | 0    | 58  | 2               |                |
|              | NDGTVGDLAQLNGSDLQFIEMQR                                      |                                 | +2                   | 1290.1122                         | 2578.2098                             | 2577.2128      | 1    | 92  | 5               |                |
| <b>No.</b>   | <b>Protein</b>                                               | <b>Matched (SEQUEST MASCOT)</b> | <b>Strategy.Hits</b> | <b>PepMatched(SEQUEST MASCOT)</b> | <b>SpectraMatched(SEQUEST MASCOT)</b> |                |      |     |                 |                |
| 168.         | IPI00021857                                                  | Y Y                             | 1                    | 2 2                               | 15 15                                 |                |      |     |                 |                |
| <b>*Des:</b> | <b>Apolipoprotein C-III precursor</b>                        |                                 |                      |                                   |                                       |                |      |     |                 |                |
|              | <b>SEQUEST:(PepMatched Observed.Hits Coverage)</b> 2 1 19.8% |                                 |                      |                                   |                                       |                |      |     |                 |                |
|              | <b>Seq</b>                                                   | <b>Charge</b>                   | <b>Xcor</b>          | <b>Delta</b>                      | <b>Probility</b>                      | <b>PepHits</b> |      |     |                 |                |
|              | DALSSVQESQVAQQAR                                             |                                 | +2                   | 4.129                             | 0.594                                 | 1.0000         | 14   |     |                 |                |
|              | TAKDALSSVQESQVAQQAR                                          |                                 | +2                   | 4.361                             | 0.553                                 | 0.9813         | 4    |     |                 |                |
|              | <b>MASCOT:(PepMatched Observed.Hits Coverage)</b> 2 1 19.8%  |                                 |                      |                                   |                                       |                |      |     |                 |                |
|              | <b>Seq</b>                                                   | <b>Charge</b>                   | <b>ObservedMS</b>    | <b>ExpectedMS</b>                 | <b>CalculatedMS</b>                   |                |      |     | <b>PepScore</b> | <b>PepHits</b> |
|              | DALSSVQESQVAQQAR                                             |                                 | +2                   | 858.9307                          | 1715.8468                             | 1715.8438      | 0    | 110 | 13              |                |
|              | TAKDALSSVQESQVAQQAR                                          |                                 | +2                   | 1009.0175                         | 2016.0204                             | 2016.0235      | 0    | 82  | 2               |                |
| <b>No.</b>   | <b>Protein</b>                                               | <b>Matched (SEQUEST MASCOT)</b> | <b>Strategy.Hits</b> | <b>PepMatched(SEQUEST MASCOT)</b> | <b>SpectraMatched(SEQUEST MASCOT)</b> |                |      |     |                 |                |
| 169.         | IPI00604488                                                  | N Y                             | 1                    | 0 2                               | 0 4                                   |                |      |     |                 |                |
| <b>*Des:</b> | <b>Hypothetical protein</b>                                  |                                 |                      |                                   |                                       |                |      |     |                 |                |
|              | <b>SEQUEST:(PepMatched Observed.Hits Coverage)</b>           |                                 |                      |                                   |                                       |                |      |     |                 |                |
|              | <b>MASCOT:(PepMatched Observed.Hits Coverage)</b> 2 1 15.08% |                                 |                      |                                   |                                       |                |      |     |                 |                |
|              | <b>Seq</b>                                                   | <b>Charge</b>                   | <b>ObservedMS</b>    | <b>ExpectedMS</b>                 | <b>CalculatedMS</b>                   |                |      |     | <b>PepScore</b> | <b>PepHits</b> |
|              | APWIEQEGPEYWDGETR                                            |                                 | +2                   | 1031.9624                         | 2061.9103                             | 2061.9068      | 0    | 41  | 2               |                |
|              | DGEDQTQDTELVETRPAGDGTFFQK                                    |                                 | +3                   | 879.7349                          | 2636.1828                             | 2636.1837      | 0    | 46  | 12              |                |
| <b>No.</b>   | <b>Protein</b>                                               | <b>Matched (SEQUEST MASCOT)</b> | <b>Strategy.Hits</b> | <b>PepMatched(SEQUEST MASCOT)</b> | <b>SpectraMatched(SEQUEST MASCOT)</b> |                |      |     |                 |                |

| Identified Human Platelet Proteins |                                                                |                          |               |                            |                                |          |        |         |  |  |
|------------------------------------|----------------------------------------------------------------|--------------------------|---------------|----------------------------|--------------------------------|----------|--------|---------|--|--|
| 170.                               | IPI00013769                                                    | Y                        | N             | 1                          | 2                              | 0        | 4      | 0       |  |  |
| *Des:                              | Alpha enolase, lung specific                                   |                          |               |                            |                                |          |        |         |  |  |
|                                    | SEQUEST:(PepMatched Observed.Hits Coverage)                    |                          |               |                            | 2                              | 1        | 7.08%  |         |  |  |
|                                    | Seq                                                            | Charge                   | Xcor          | Delta                      | Probility                      | PepHits  |        |         |  |  |
|                                    | DATNVGDEGGFAPNILENK                                            |                          |               | +2                         | 5.409                          | 0.572    | 1.0000 | 2       |  |  |
|                                    | YISPDQLADLYK                                                   | +2                       | 3.406         | 0.597                      | 0.9938                         | 2        |        |         |  |  |
|                                    | MASCOT:(PepMatched Observed.Hits Coverage)                     |                          |               |                            |                                |          |        |         |  |  |
| No.                                | Protein                                                        | Matched (SEQUEST MASCOT) | Strategy.Hits | PepMatched(SEQUEST MASCOT) | SpectraMatched(SEQUEST MASCOT) |          |        |         |  |  |
| 171.                               | IPI00376502                                                    | N                        | Y             | 1                          | 0                              | 2        | 0      | 4       |  |  |
| *Des:                              | Calcium and DAG-regulated guanine nucleotide exchange factor I |                          |               |                            |                                |          |        |         |  |  |
|                                    | SEQUEST:(PepMatched Observed.Hits Coverage)                    |                          |               |                            | 2                              | 1        | 5.61%  |         |  |  |
|                                    | MASCOT:(PepMatched Observed.Hits Coverage)                     |                          |               |                            | 2                              | 1        | 5.61%  |         |  |  |
|                                    | Seq                                                            | Charge                   | ObservedMS    | ExpectedMS                 | CalculatedMS                   | Pepscore |        | PepHits |  |  |
|                                    | HSSLIDIDSVPTYK                                                 | +2                       | 787.9534      | 1573.8922                  | 1573.7988                      | 0.09     | 46     | 2       |  |  |
|                                    | LWEGLTELVTATGNYGNYR                                            | +2                       | 1079.1030     | 2156.1914                  | 2156.0538                      | 0.14     | 74     | 2       |  |  |
| No.                                | Protein                                                        | Matched (SEQUEST MASCOT) | Strategy.Hits | PepMatched(SEQUEST MASCOT) | SpectraMatched(SEQUEST MASCOT) |          |        |         |  |  |
| 172.                               | IPI00216256                                                    | Y                        | N             | 1                          | 2                              | 0        | 3      | 0       |  |  |
| *Des:                              | Splice Isoform 2 of WD-repeat protein 1                        |                          |               |                            |                                |          |        |         |  |  |
|                                    | SEQUEST:(PepMatched Observed.Hits Coverage)                    |                          |               |                            | 2                              | 1        | 5.53%  |         |  |  |
|                                    | Seq                                                            | Charge                   | Xcor          | Delta                      | Probility                      | PepHits  |        |         |  |  |
|                                    | PYEIKKVFASLPQVER                                               |                          |               | +3                         | 4.374                          | 0.471    | 0.9983 | 3       |  |  |
|                                    | IKDIAWTEDSKR                                                   | +2                       | 3.575         | 0.430                      | 0.9636                         | 3        |        |         |  |  |
|                                    | MASCOT:(PepMatched Observed.Hits Coverage)                     |                          |               |                            |                                |          |        |         |  |  |
| No.                                | Protein                                                        | Matched (SEQUEST MASCOT) | Strategy.Hits | PepMatched(SEQUEST MASCOT) | SpectraMatched(SEQUEST MASCOT) |          |        |         |  |  |
| 173.                               | IPI00022229                                                    | N                        | Y             | 1                          | 0                              | 63       | 0      | 73      |  |  |
| *Des:                              | Apolipoprotein B-100 precursor                                 |                          |               |                            |                                |          |        |         |  |  |
|                                    | SEQUEST:(PepMatched Observed.Hits Coverage)                    |                          |               |                            | 63                             | 1        | 20.51% |         |  |  |
|                                    | MASCOT:(PepMatched Observed.Hits Coverage)                     |                          |               |                            | 63                             | 1        | 20.51% |         |  |  |
|                                    | Seq                                                            | Charge                   | ObservedMS    | ExpectedMS                 | CalculatedMS                   | Pepscore |        | PepHits |  |  |
|                                    | TGISPLALIK                                                     | +2                       | 506.8521      | 1011.6896                  | 1011.6328                      | 0.06     | 51     | 1       |  |  |
|                                    | NNALDFVTK                                                      | +2                       | 511.3033      | 1020.5920                  | 1020.5240                      | 0.07     | 44     | 1       |  |  |
|                                    | IPSVQINFK                                                      | +2                       | 523.3353      | 1044.6560                  | 1044.5967                      | 0.06     | 41     | 1       |  |  |
|                                    | FPEVDVLTK                                                      | +2                       | 524.3206      | 1046.6266                  | 1046.5648                      | 0.06     | 50     | 1       |  |  |
|                                    | IEIPLPFGGK                                                     | +2                       | 535.8550      | 1069.6954                  | 1069.6171                      | 0.08     | 61     | 1       |  |  |
|                                    | LVGFIDDAVK                                                     | +2                       | 538.8372      | 1075.6598                  | 1075.5913                      | 0.07     | 44     | 1       |  |  |
|                                    | LIDVISMYR                                                      | +2                       | 555.3432      | 1108.6718                  | 1108.5950                      | 0.08     | 34     | 1       |  |  |
|                                    | HINIDQFVR                                                      | +2                       | 571.3476      | 1140.6806                  | 1140.6040                      | 0.08     | 42     | 3       |  |  |
|                                    | YENYELTK                                                       | +2                       | 586.8281      | 1171.6416                  | 1171.5761                      | 0.07     | 48     | 1       |  |  |
|                                    | ATGVLYDYVNK                                                    | +2                       | 621.8569      | 1241.6992                  | 1241.6292                      | 0.07     | 48     | 1       |  |  |
|                                    | DLKVEDIPLAR                                                    | +2                       | 634.8945      | 1267.7744                  | 1267.7136                      | 0.06     | 36     | 1       |  |  |
|                                    | SVSLPSLDPASAK                                                  | +2                       | 636.3820      | 1270.7494                  | 1270.6768                      | 0.07     | 50     | 1       |  |  |
|                                    | TEVIPPLIENR                                                    | +2                       | 640.9000      | 1279.7854                  | 1279.7136                      | 0.07     | 63     | 1       |  |  |
|                                    | IISDYHQQFR                                                     | +2                       | 653.8768      | 1305.7390                  | 1305.6466                      | 0.09     | 35     | 1       |  |  |
|                                    | GFEPTLEALFGK                                                   | +2                       | 654.8831      | 1307.7516                  | 1307.6761                      | 0.08     | 54     | 1       |  |  |

Identified Human Platelet Proteins

|                        |    |           |           |           |      |    |   |  |
|------------------------|----|-----------|-----------|-----------|------|----|---|--|
| EVGTVLSQVYSK           | +2 | 655.3934  | 1308.7722 | 1308.6925 | 0.08 | 82 | 1 |  |
| NPNGYSFSIPVK           | +2 | 661.8782  | 1321.7418 | 1321.6666 | 0.08 | 62 | 1 |  |
| YGMVAQVTQTLK           | +2 | 669.8998  | 1337.7850 | 1337.7013 | 0.08 | 67 | 1 |  |
| LPYTIITPPLK            | +2 | 678.9506  | 1355.8866 | 1355.8064 | 0.08 | 61 | 1 |  |
| SEYQADYESLR            | +2 | 680.8531  | 1359.6916 | 1359.5942 | 0.1  | 49 | 1 |  |
| INNQLTLDSENTK          | +2 | 680.8978  | 1359.7810 | 1359.6994 | 0.08 | 53 | 1 |  |
| TLADLTLLDSPK           | +2 | 700.4355  | 1398.8564 | 1398.7970 | 0.06 | 64 | 1 |  |
| FQFPGKPGIYTR           | +2 | 705.9246  | 1409.8346 | 1409.7455 | 0.09 | 38 | 2 |  |
| ALVEQGFTVPEIK          | +2 | 715.9204  | 1429.8262 | 1429.7816 | 0.04 | 69 | 1 |  |
| LNGEIQALELPQK          | +2 | 726.9370  | 1451.8594 | 1451.7983 | 0.06 | 62 | 1 |  |
| IAIANIIDEIEK           | +2 | 727.9528  | 1453.8910 | 1453.8391 | 0.05 | 66 | 1 |  |
| LSNDMMGSYAEMK          | +2 | 738.8674  | 1475.7202 | 1475.6094 | 0.11 | 42 | 1 |  |
| HIQNIDIQHLGK           | +3 | 496.3058  | 1485.8956 | 1485.8052 | 0.09 | 56 | 1 |  |
| IGQDGISTSATTNLK        | +2 | 753.4390  | 1504.8634 | 1504.7733 | 0.09 | 60 | 1 |  |
| AEPLAFTFSHDYK          | +2 | 763.4278  | 1524.8410 | 1524.7249 | 0.12 | 70 | 1 |  |
| LLSGGNTLHLVSTTK        | +2 | 770.9803  | 1539.9460 | 1539.8620 | 0.08 | 59 | 2 |  |
| TLQGIPQMIGEVIR         | +2 | 777.9925  | 1553.9704 | 1553.8599 | 0.11 | 67 | 1 |  |
| ITENDIQIALDDAK         | +2 | 779.9545  | 1557.8944 | 1557.7886 | 0.11 | 85 | 1 |  |
| AVSMPSFSILGSDVR        | +2 | 783.4352  | 1564.8558 | 1564.7919 | 0.06 | 87 | 1 |  |
| SGSSTASWIQNVDTK        | +2 | 790.9326  | 1579.8506 | 1579.7478 | 0.1  | 68 | 1 |  |
| MYQMDIQQELQR           | +2 | 791.9136  | 1581.8126 | 1581.7279 | 0.08 | 58 | 1 |  |
| VSALLTPAEQTGTWK        | +2 | 801.4661  | 1600.9176 | 1600.8460 | 0.07 | 53 | 1 |  |
| LALWGEHTGQLYSK         | +2 | 801.9676  | 1601.9206 | 1601.8201 | 0.1  | 72 | 2 |  |
| TSSFALNLPPLPEVK        | +2 | 808.9976  | 1615.9806 | 1615.8821 | 0.1  | 80 | 1 |  |
| ALYWVNGQVPDGVSK        | +2 | 816.9673  | 1631.9200 | 1631.8307 | 0.09 | 57 | 1 |  |
| SVSDGIAALDLNAVANK      | +2 | 829.4900  | 1656.9654 | 1656.8682 | 0.1  | 79 | 1 |  |
| GIISALLVPPETEEAK       | +2 | 834.0129  | 1666.0112 | 1665.9188 | 0.09 | 47 | 1 |  |
| NLQNNAEWVYQGAIK        | +2 | 888.4848  | 1774.9550 | 1774.8750 | 0.08 | 47 | 1 |  |
| ATFQTPDFIVPLTDLR       | +2 | 917.5197  | 1833.0248 | 1832.9672 | 0.06 | 48 | 1 |  |
| TEHGSEMLFFGNAIEGK      | +2 | 934.0013  | 1865.9880 | 1865.8617 | 0.13 | 54 | 1 |  |
| FSVPAGIVIPSFQALTAR     | +2 | 937.5588  | 1873.1030 | 1873.0461 | 0.06 | 47 | 1 |  |
| VIGNMGQTMELTPELK       | +2 | 945.0150  | 1888.0154 | 1887.9434 | 0.07 | 76 | 1 |  |
| NLTDFAEQYSIQDWAK       | +2 | 965.0111  | 1928.0076 | 1927.8952 | 0.11 | 42 | 1 |  |
| TILGTMPAFEVSLQALQK     | +2 | 974.0952  | 1946.1758 | 1946.0546 | 0.12 | 47 | 1 |  |
| LPQQANDYLNSFNWER       | +2 | 998.0135  | 1994.0124 | 1993.9282 | 0.08 | 62 | 1 |  |
| SFDYHQFVDETNDKIR       | +3 | 672.0237  | 2013.0493 | 2012.9228 | 0.13 | 64 | 2 |  |
| VPLLLSEPINIIDALEMR     | +2 | 1018.6150 | 2035.2154 | 2035.1387 | 0.08 | 72 | 3 |  |
| ILGEELGFASLHDLQLLGK    | +2 | 1027.1216 | 2052.2286 | 2052.1255 | 0.1  | 62 | 2 |  |
| NHLQLEGLFFTNGEHTSK     | +3 | 691.3930  | 2071.1572 | 2071.0122 | 0.14 | 43 | 2 |  |
| ASGSLPYTQTLQDHLNSLK    | +2 | 1037.0818 | 2072.1490 | 2072.0538 | 0.1  | 62 | 2 |  |
| TQFNNEYSQDLDAYNTK      | +2 | 1083.0420 | 2164.0694 | 2163.9345 | 0.13 | 57 | 1 |  |
| LEIQSQVDSQHVGHVLTAK    | +2 | 1088.6399 | 2175.2652 | 2175.1283 | 0.14 | 46 | 2 |  |
| QVFLYPEKDEPTYILNIK     | +2 | 1105.6533 | 2209.2920 | 2209.1670 | 0.13 | 37 | 2 |  |
| VPSYTLILPSLELPVHVPR    | +3 | 748.4914  | 2242.4524 | 2242.3089 | 0.14 | 49 | 2 |  |
| LPYTIITPPLKDFSLWEK     | +3 | 754.7889  | 2261.3449 | 2261.2347 | 0.11 | 39 | 2 |  |
| VNWEAAAASGLLTSKDNVPK   | +2 | 1150.6661 | 2299.3176 | 2299.1695 | 0.15 | 51 | 2 |  |
| IADFELPTIIVPEQTIEIPSIK | +2 | 1233.7550 | 2465.4954 | 2465.3668 | 0.13 | 42 | 1 |  |

Identified Human Platelet Proteins

NFVASHIANILNSEELDIQLDKK +3 871.1817 2610.5233 2610.3652 0.16 41 1

No. 174. Protein IPI00442073 Matched (SEQUEST MASCOT) Y N Strategy.Hits 1 2 PepMatched(SEQUEST MASCOT) 0 11 SpectraMatched(SEQUEST MASCOT) 0  
 \*Des: Hypothetical protein FLJ16726  
 SEQUEST:(PepMatched Observed.Hits Coverage) 2 1 10.25%  
 Seq Charge Xcor Delta Probility PepHits  
 GFGFGQGAGALVHS +2 3.970 0.607 1.0000 6  
 NFGPKGFGFGQGAGALVHS +3 5.474 0.712 1.0000 7  
 MASCOT:(PepMatched Observed.Hits Coverage)

No. 175. Protein IPI00177728 Matched (SEQUEST MASCOT) N Y Strategy.Hits 1 0 PepMatched(SEQUEST MASCOT) 2 0 SpectraMatched(SEQUEST MASCOT) 2  
 \*Des: Cytosolic nonspecific dipeptidase  
 SEQUEST:(PepMatched Observed.Hits Coverage)  
 MASCOT:(PepMatched Observed.Hits Coverage) 2 1 6.83%  
 Seq Charge ObservedMS ExpectedMS CalculatedMS Pepscore PepHits  
 TVFGVEPDLTR +2 617.3724 1232.7302 1232.6401 0.09 67 1  
 LVPNMTPEVVGEQVTSYLTK +2 1103.1462 2204.2778 2204.1398 0.14 54 1

No. 176. Protein IPI00301058 Matched (SEQUEST MASCOT) N Y Strategy.Hits 2 0 PepMatched(SEQUEST MASCOT) 6 0 SpectraMatched(SEQUEST MASCOT) 7  
 \*Des: Vasodilator-stimulated phosphoprotein  
 SEQUEST:(PepMatched Observed.Hits Coverage)  
 MASCOT:(PepMatched Observed.Hits Coverage) 6 2 21.76%  
 Seq Charge ObservedMS ExpectedMS CalculatedMS Pepscore PepHits  
 QVWGLNFGSK +2 568.3215 1134.6284 1134.5821 0.05 34 1  
 WLPAGTGPQAFSR +2 694.4076 1386.8006 1386.7044 0.1 68 1  
 VQIYHNPTANSFR +2 773.9459 1545.8772 1545.7688 0.11 55 2  
 YNQATPNFHQWR +2 781.4234 1560.8322 1560.7222 0.11 50 2  
 SGGGGLMEEMNAMLAR +2 812.3898 1622.7650 1622.7214 0.04 92 1  
 VKEEIEAFVQELR +2 852.0031 1701.9916 1701.9301 0.06 85 2

No. 177. Protein IPI00019580 Matched (SEQUEST MASCOT) Y Y Strategy.Hits 1 9 PepMatched(SEQUEST MASCOT) 9 108 SpectraMatched(SEQUEST MASCOT) 299  
 \*Des: Plasminogen precursor  
 SEQUEST:(PepMatched Observed.Hits Coverage) 9 1 12.74%  
 Seq Charge Xcor Delta Probility PepHits  
 SPRPSSYK VILGAHQEVNLEPHVQIEVSR +3 7.427 0.613 1.0000 73  
 DIALLKLSSPAVITDK +2 5.347 0.577 1.0000 19  
 FVTWIEGVMR +2 3.576 0.607 1.0000 15  
 FVTWIEGVMRN +2 3.053 0.615 0.9584 13  
 VSRFVTWIEGVMR +2 4.236 0.562 1.0000 31  
 VSRFVTWIEGVMRN +3 3.790 0.596 0.9989 15  
 SPRPSSYK +2 2.746 0.499 0.9817 5  
 VILGAHQEVNLEPHVQIEVSR LFLFLEPTRK +3 3.813 0.504 0.9974 22  
 EAQLPVIENK +2 2.529 0.666 0.9880 25

Identified Human Platelet Proteins

| No.   | Protein                                     | Matched (SEQUEST MASCOT) | Strategy.Hits | PepMatched(SEQUEST MASCOT) | SpectraMatched(SEQUEST MASCOT) |   |
|-------|---------------------------------------------|--------------------------|---------------|----------------------------|--------------------------------|---|
| 178.  | IPI00000230                                 | Y N                      | 2 3           | 0 12                       | 0 0                            |   |
| *Des: | Hypothetical protein DKFZp586K2222          |                          |               |                            |                                |   |
|       | SEQUEST:(PepMatched Observed.Hits Coverage) |                          | 3             | 3                          | 15.91%                         |   |
|       | Seq Charge Xcor Delta                       |                          | Probility     | PepHits                    |                                |   |
|       | AEDSLLAEEAAK +2                             | 2.711                    | 0.455         | 0.9744                     | 1                              |   |
|       | IQLVEEELDR +2                               | 3.820                    | 0.449         | 0.9954                     | 8                              |   |
|       | EENLSMHQMLDQTLLELNN +2                      | 4.846                    | 0.521         | 0.9977                     | 4                              |   |
|       | MASCOT:(PepMatched Observed.Hits Coverage)  |                          | 2             | 1                          | 6.15%                          |   |
|       | Seq Charge ObservedMS ExpectedMS            |                          | CalculatedMS  | Pepscore                   | PepHits                        |   |
|       | TSYLTELIDR +2                               | 605.8651                 | 1209.7156     | 1209.6241                  | 0.09 72                        | 2 |
|       | ADIWSLGITAIELAR +2                          | 815.0215                 | 1628.0284     | 1627.8933                  | 0.14 51                        | 2 |
| 180.  | IPI00008223                                 | Y Y                      | 2 3           | 2 8                        | 2 2                            |   |
| *Des: | UV excision repair protein RAD23 homolog B  |                          |               |                            |                                |   |
|       | SEQUEST:(PepMatched Observed.Hits Coverage) |                          | 3             | 2                          | 14.66%                         |   |
|       | Seq Charge Xcor Delta                       |                          | Probility     | PepHits                    |                                |   |
|       | NFVVVMVTKPK +2                              | 2.967                    | 0.353         | 0.9540                     | 5                              |   |
|       | NENLAANFLLQQNFDE +2                         | 4.925                    | 0.658         | 1.0000                     | 6                              |   |
|       | SNLFEDATSALVTGQSYENMVTEIMSMGYER +3          | 4.412                    | 0.562         | 0.9984                     | 2                              |   |
|       | MASCOT:(PepMatched Observed.Hits Coverage)  |                          | 2             | 2                          | 12.01%                         |   |
|       | Seq Charge ObservedMS ExpectedMS            |                          | CalculatedMS  | Pepscore                   | PepHits                        |   |
|       | QIIQQNPSLLPALLQQIGR +2                      | 1065.6798                | 2129.3450     | 2129.2320                  | 0.11 56                        | 1 |
|       | QEKPAEKPAETPVATSPTATDSTSGDSSR +4            | 737.1523                 | 2944.5801     | 2944.3897                  | 0.19 46                        | 1 |
| 181.  | IPI00216691                                 | Y Y                      | 1 2           | 2 3                        | 3 3                            |   |
| *Des: | Profilin-1                                  |                          |               |                            |                                |   |

Identified Human Platelet Proteins

|          |                                                                                                          |           |           |           |      |    |   |  |  |
|----------|----------------------------------------------------------------------------------------------------------|-----------|-----------|-----------|------|----|---|--|--|
|          | SEQUEST:(PepMatched Observed.Hits Coverage)                                                              | 2         | 1         | 21.12%    |      |    |   |  |  |
|          | Seq Charge Xcor Delta Probility PepHits                                                                  |           |           |           |      |    |   |  |  |
|          | SSFYVNGLTLGGQK+2                                                                                         | 3.392     | 0.600     | 0.9883    | 2    |    |   |  |  |
|          | DSLLQDGEFSMDLR+2                                                                                         | 4.584     | 0.711     | 1.0000    | 1    |    |   |  |  |
|          | MASCOT:(PepMatched Observed.Hits Coverage)                                                               | 2         | 1         | 21.12%    |      |    |   |  |  |
|          | Seq Charge ObservedMS ExpectedMS CalculatedMS Pepscore PepHits                                           |           |           |           |      |    |   |  |  |
|          | SSFYVNGLTLGGQK+2                                                                                         | 735.8837  | 1469.7528 | 1469.7514 | 0    | 80 | 2 |  |  |
|          | DSLLQDGEFSMDLR+2                                                                                         | 813.3740  | 1624.7334 | 1624.7403 | 0    | 88 | 1 |  |  |
| No. 182. | Protein Matched (SEQUEST MASCOT) Strategy.Hits PepMatched(SEQUEST MASCOT) SpectraMatched(SEQUEST MASCOT) |           |           |           |      |    |   |  |  |
|          | IPI00297550 Y Y 2 5 4 9 11                                                                               |           |           |           |      |    |   |  |  |
| *Des:    | Coagulation factor XIII A chain precursor                                                                |           |           |           |      |    |   |  |  |
|          | SEQUEST:(PepMatched Observed.Hits Coverage)                                                              | 5         | 10        | 10.75%    |      |    |   |  |  |
|          | Seq Charge Xcor Delta Probility PepHits                                                                  |           |           |           |      |    |   |  |  |
|          | LALETALMYGAK +2                                                                                          | 3.003     | 0.497     | 0.9770    | 1    |    |   |  |  |
|          | SNVDMDFEVENAVLGK +2                                                                                      | 5.223     | 0.566     | 0.9948    | 3    |    |   |  |  |
|          | NPETDTYILFNPWCEDDAVYLDNEKER +3                                                                           | 5.458     | 0.518     | 1.0000    | 2    |    |   |  |  |
|          | NPETDTYILFNPWCEDDAVYLDNEK +3                                                                             | 3.654     | 0.373     | 0.9920    | 1    |    |   |  |  |
|          | SWSYGQFEDGILDTCLYVMDR +2                                                                                 | 4.988     | 0.675     | 1.0000    | 2    |    |   |  |  |
|          | MASCOT:(PepMatched Observed.Hits Coverage)                                                               | 4         | 8         | 9%        |      |    |   |  |  |
|          | Seq Charge ObservedMS ExpectedMS CalculatedMS Pepscore PepHits                                           |           |           |           |      |    |   |  |  |
|          | SNVDMDFEVENAVLGK +2                                                                                      | 883.9185  | 1765.8224 | 1765.8192 | 0    | 75 | 2 |  |  |
|          | SWSYGQFEDGILDTCLYVMDR +2                                                                                 | 1249.5525 | 2497.0904 | 2497.0929 | 0    | 97 | 2 |  |  |
|          | NPETDTYILFNPWCEDDAVYLDNEK +3                                                                             | 1002.1114 | 3003.3123 | 3003.3120 | 0    | 42 | 1 |  |  |
|          | NPETDTYILFNPWCEDDAVYLDNEKER +3                                                                           | 1097.1616 | 3288.4630 | 3288.4557 | 0.01 | 79 | 2 |  |  |
| No. 183. | Protein Matched (SEQUEST MASCOT) Strategy.Hits PepMatched(SEQUEST MASCOT) SpectraMatched(SEQUEST MASCOT) |           |           |           |      |    |   |  |  |
|          | IPI00303161 N Y 1 0 3 0 3                                                                                |           |           |           |      |    |   |  |  |
| *Des:    | Endothelial cell adhesion molecule                                                                       |           |           |           |      |    |   |  |  |
|          | SEQUEST:(PepMatched Observed.Hits Coverage)                                                              |           |           |           |      |    |   |  |  |
|          | MASCOT:(PepMatched Observed.Hits Coverage)                                                               | 3         | 1         | 15.86%    |      |    |   |  |  |
|          | Seq Charge ObservedMS ExpectedMS CalculatedMS Pepscore PepHits                                           |           |           |           |      |    |   |  |  |
|          | ALEEPANDIKEDAIAPR +3                                                                                     | 618.0212  | 1851.0418 | 1850.9373 | 0.1  | 55 | 1 |  |  |
|          | QLPSFQTFAPALDVIR +2                                                                                      | 975.5933  | 1949.1720 | 1949.0410 | 0.13 | 46 | 1 |  |  |
|          | LPTTDGAHPQPISPIPGGVSSGLSR +3                                                                             | 843.5016  | 2527.4830 | 2527.3030 | 0.18 | 51 | 1 |  |  |
| No. 184. | Protein Matched (SEQUEST MASCOT) Strategy.Hits PepMatched(SEQUEST MASCOT) SpectraMatched(SEQUEST MASCOT) |           |           |           |      |    |   |  |  |
|          | IPI00215965 N Y 1 0 2 0 5                                                                                |           |           |           |      |    |   |  |  |
| *Des:    | Heterogeneous nuclear ribonucleoprotein A1 isoform b                                                     |           |           |           |      |    |   |  |  |
|          | SEQUEST:(PepMatched Observed.Hits Coverage)                                                              |           |           |           |      |    |   |  |  |
|          | MASCOT:(PepMatched Observed.Hits Coverage)                                                               | 2         | 1         | 7.91%     |      |    |   |  |  |
|          | Seq Charge ObservedMS ExpectedMS CalculatedMS Pepscore PepHits                                           |           |           |           |      |    |   |  |  |
|          | EDSQRPGAHLTVK +2                                                                                         | 719.3723  | 1436.7301 | 1436.7372 | 0    | 42 | 1 |  |  |
|          | GFAFVTFDDHDSVDK +2                                                                                       | 850.3846  | 1698.7546 | 1698.7525 | 0    | 64 | 4 |  |  |
| No. 185. | Protein Matched (SEQUEST MASCOT) Strategy.Hits PepMatched(SEQUEST MASCOT) SpectraMatched(SEQUEST MASCOT) |           |           |           |      |    |   |  |  |
|          | IPI00220642 Y Y 1 4 3 14 9                                                                               |           |           |           |      |    |   |  |  |



Identified Human Platelet Proteins

|          |                                                                                                          |    |           |           |           |      |     |    |  |  |
|----------|----------------------------------------------------------------------------------------------------------|----|-----------|-----------|-----------|------|-----|----|--|--|
| *Des:    | 14-3-3 protein gamma                                                                                     |    |           |           |           |      |     |    |  |  |
|          | SEQUEST:(PepMatched Observed.Hits Coverage)                                                              | 4  | 10        | 25.89%    |           |      |     |    |  |  |
|          | Seq Charge Xcor Delta Probility PepHits                                                                  |    |           |           |           |      |     |    |  |  |
|          | DNLTLWTSDDQDDDGEGN                                                                                       | +2 | 4.422     | 0.579     | 0.9973    | 5    |     |    |  |  |
|          | TAFDDAIAELDTLNEDSYK                                                                                      | +2 | 5.570     | 0.666     | 1.0000    | 6    |     |    |  |  |
|          | TAFDDAIAELDTLNEDSYKDSTLIMQLLR                                                                            | +3 | 4.158     | 0.492     | 0.9927    | 1    |     |    |  |  |
|          | NVTELNEPLSNEER                                                                                           | +2 | 3.399     | 0.435     | 0.9897    | 2    |     |    |  |  |
|          | MASCOT:(PepMatched Observed.Hits Coverage)                                                               | 3  | 6         | 17.92%    |           |      |     |    |  |  |
|          | Seq Charge ObservedMS ExpectedMS CalculatedMS Pepscore PepHits                                           |    |           |           |           |      |     |    |  |  |
|          | NVTELNEPLSNEER                                                                                           | +2 | 822.3984  | 1642.7822 | 1642.7798 | 0    | 56  | 1  |  |  |
|          | TAFDDAIAELDTLNEDSYK                                                                                      | +2 | 1065.9901 | 2129.9657 | 2129.9640 | 0    | 114 | 6  |  |  |
|          | TAFDDAIAELDTLNEDSYKDSTLIMQLLR                                                                            | +3 | 1101.2067 | 3300.5982 | 3300.6071 | 0    | 66  | 1  |  |  |
| No. 186. | Protein Matched (SEQUEST MASCOT) Strategy.Hits PepMatched(SEQUEST MASCOT) SpectraMatched(SEQUEST MASCOT) |    |           |           |           |      |     |    |  |  |
|          | IPI00010796                                                                                              | Y  | Y         | 2         | 2         | 10   | 4   | 16 |  |  |
| *Des:    | Protein disulfide-isomerase precursor                                                                    |    |           |           |           |      |     |    |  |  |
|          | SEQUEST:(PepMatched Observed.Hits Coverage)                                                              | 2  | 1         | 9.09%     |           |      |     |    |  |  |
|          | Seq Charge Xcor Delta Probility PepHits                                                                  |    |           |           |           |      |     |    |  |  |
|          | ILFIFIDSDHTDNQR                                                                                          | +2 | 3.979     | 0.535     | 0.9948    | 2    |     |    |  |  |
|          | TGPAATTLPDGAAAESLVESSEVAVIGFFK                                                                           | +3 | 5.543     | 0.574     | 1.0000    | 2    |     |    |  |  |
|          | MASCOT:(PepMatched Observed.Hits Coverage)                                                               | 10 | 2         | 28.82%    |           |      |     |    |  |  |
|          | Seq Charge ObservedMS ExpectedMS CalculatedMS Pepscore PepHits                                           |    |           |           |           |      |     |    |  |  |
|          | ILEFFGLK                                                                                                 | +2 | 483.8079  | 965.6012  | 965.5585  | 0.04 | 52  | 1  |  |  |
|          | EADDIVNWLK                                                                                               | +2 | 601.8326  | 1201.6506 | 1201.5979 | 0.05 | 41  | 1  |  |  |
|          | NFEDVAFDEK                                                                                               | +2 | 607.3137  | 1212.6128 | 1212.5298 | 0.08 | 34  | 1  |  |  |
|          | MDSTANEVEAVK                                                                                             | +2 | 647.3477  | 1292.6808 | 1292.5918 | 0.09 | 71  | 3  |  |  |
|          | YQLDKDGVVLFK                                                                                             | +2 | 712.9326  | 1423.8506 | 1423.7711 | 0.08 | 57  | 2  |  |  |
|          | YKPESEELTAER                                                                                             | +3 | 484.6041  | 1450.7905 | 1450.6939 | 0.1  | 55  | 2  |  |  |
|          | VDATEESDLAQQYGVR                                                                                         | +2 | 890.9721  | 1779.9296 | 1779.8275 | 0.1  | 77  | 1  |  |  |
|          | HNQLPLVIEFTEQTAPK                                                                                        | +2 | 983.0778  | 1964.1410 | 1964.0367 | 0.1  | 64  | 2  |  |  |
|          | NNFEGEVTKENLLDFIK                                                                                        | +3 | 670.7147  | 2009.1223 | 2009.0105 | 0.11 | 34  | 1  |  |  |
|          | QFLQAAEAIDDIPFGITSNSDVFSK                                                                                | +3 | 905.1824  | 2712.5254 | 2712.3282 | 0.2  | 43  | 2  |  |  |
| No. 187. | Protein Matched (SEQUEST MASCOT) Strategy.Hits PepMatched(SEQUEST MASCOT) SpectraMatched(SEQUEST MASCOT) |    |           |           |           |      |     |    |  |  |
|          | IPI00220644                                                                                              | Y  | Y         | 2         | 8         | 7    | 22  | 36 |  |  |
| *Des:    | Pyruvate kinase 3 isoform 2                                                                              |    |           |           |           |      |     |    |  |  |
|          | SEQUEST:(PepMatched Observed.Hits Coverage)                                                              | 8  | 16        | 22.96%    |           |      |     |    |  |  |
|          | Seq Charge Xcor Delta Probility PepHits                                                                  |    |           |           |           |      |     |    |  |  |
|          | LDIDSPPI TAR                                                                                             | +2 | 2.989     | 0.434     | 0.9810    | 4    |     |    |  |  |
|          | NTGIICTIGPASR                                                                                            | +2 | 3.245     | 0.411     | 0.9791    | 1    |     |    |  |  |
|          | DPVQEAWAEDVDLR                                                                                           | +2 | 4.144     | 0.542     | 0.9852    | 1    |     |    |  |  |
|          | RFDEILEASDGIMVAR                                                                                         | +3 | 3.607     | 0.386     | 0.9835    | 1    |     |    |  |  |
|          | IYVDDGLISLQVK                                                                                            | +2 | 4.141     | 0.590     | 0.9950    | 2    |     |    |  |  |
|          | AEGSDVANAVLDGADCIMLSGETAK                                                                                | +3 | 3.967     | 0.422     | 0.9870    | 2    |     |    |  |  |
|          | AEGSDVANAVLDGADCIMLSGETAKGDYPLEAVR                                                                       | +3 | 5.242     | 0.571     | 1.0000    | 5    |     |    |  |  |
|          | FGVEQDVMVFASFIR                                                                                          | +2 | 5.263     | 0.563     | 1.0000    | 4    |     |    |  |  |
|          | MASCOT:(PepMatched Observed.Hits Coverage)                                                               | 7  | 11        | 20.74%    |           |      |     |    |  |  |

Identified Human Platelet Proteins

| Seq                                | Charge | ObservedMS | ExpectedMS                         | CalculatedMS | PepScore | PepHits |
|------------------------------------|--------|------------|------------------------------------|--------------|----------|---------|
| LDIDSPITAR                         | +2     | 599.3230   | 1196.6314 1196.6401 0              | 54           | 3        |         |
| DPVQEAWAEDVDLR                     | +2     |            | 821.8882 1641.7618 1641.7634 0     | 55           | 1        |         |
| GADFLVTEVENGGSLGSK                 | +2     |            | 890.9347 1779.8548 1778.8686 0.99  | 52           | 3        |         |
| FGVEQDVMVFASFIR                    | +2     |            | 930.4542 1858.8938 1858.8923 0     | 116          | 10       |         |
| AEQSDVANAVLDGADCIMLSGETAK          | +2     |            | 1219.0653 2436.1161 2436.1148 0    | 56           | 4        |         |
| AEQSDVANAVLDGADCIMLSGETAKGDYPLEAVR | +3     |            | 1146.5468 3436.6184 3436.6125 0.01 | 100          | 13       |         |
| IYVDDGLISLQVK                      | +2     | 731.9124   | 1461.8102 1461.8078 0              | 73           | 4        |         |

No. 188. Protein IPI00014572 Matched (SEQUEST MASCOT) Strategy.Y Hits PepMatched(SEQUEST MASCOT) SpectraMatched(SEQUEST MASCOT)  
 \*Des: SPARC precursor  
 SEQUEST:(PepMatched Observed.Hits Coverage) 2 1 11.97%  
 Seq Charge Xcor Delta Probility PepHits  
 NVLVTLYERDEDNLLTEK +3 3.148 0.431 0.9659 4  
 YIPCLDSELTEFPLR +2 2.761 0.526 0.9680 2  
 MASCOT:(PepMatched Observed.Hits Coverage)

No. 189. Protein IPI00383225 Matched (SEQUEST MASCOT) Strategy.Y Hits PepMatched(SEQUEST MASCOT) SpectraMatched(SEQUEST MASCOT)  
 \*Des: Autoantigen protein  
 SEQUEST:(PepMatched Observed.Hits Coverage)  
 MASCOT:(PepMatched Observed.Hits Coverage) 2 1 14.44%  
 Seq Charge ObservedMS ExpectedMS CalculatedMS PepScore PepHits  
 QEMGEEEEENETFGLSR +2 1007.4213 2012.8280 2012.8268 0 63 2  
 RAEQIEDINNTGTESASEEGDSSLITVVPVK +3 1143.9020 3428.6841 3428.6794 0 64 2

No. 190. Protein IPI00420084 Matched (SEQUEST MASCOT) Strategy.Y Hits PepMatched(SEQUEST MASCOT) SpectraMatched(SEQUEST MASCOT)  
 \*Des: BH3 interacting domain death agonist  
 SEQUEST:(PepMatched Observed.Hits Coverage)  
 MASCOT:(PepMatched Observed.Hits Coverage) 2 1 17.47%  
 Seq Charge ObservedMS ExpectedMS CalculatedMS PepScore PepHits  
 IEADSESQEDIIR +2 752.8614 1503.7083 1503.7052 0 75 2  
 ELDALGHELPVLAPQWEGYDELQTDGNR +3 1055.8446 3164.5120 3164.5050 0.01 64 2

No. 191. Protein IPI00220573 Matched (SEQUEST MASCOT) Strategy.Y Hits PepMatched(SEQUEST MASCOT) SpectraMatched(SEQUEST MASCOT)  
 \*Des: Myosin regulatory light chain 2, nonsarcomeric  
 SEQUEST:(PepMatched Observed.Hits Coverage) 2 4 24.85%  
 Seq Charge Xcor Delta Probility PepHits  
 FTDEEVDELYR +2 3.531 0.545 0.9975 4  
 NPTDEYLDAMMNEAPGPINFMTMFLTMFGEK +3 3.682 0.350 0.9827 1  
 MASCOT:(PepMatched Observed.Hits Coverage) 7 11 59.53%  
 Seq Charge ObservedMS ExpectedMS CalculatedMS PepScore PepHits  
 LNGTDPEDVIR +2 615.3041 1228.5936 1227.6095 0.98 75 5  
 GNFNIEFTR +2 630.8042 1259.5938 1259.5934 0 60 4

Identified Human Platelet Proteins

|                      |    |           |           |           |      |     |    |
|----------------------|----|-----------|-----------|-----------|------|-----|----|
| NAFACFDEEATGTIQEDYLR | +2 | 1147.0099 | 2292.0052 | 2292.0004 | 0    | 130 | 30 |
| ELLTTMGDRFTDEEVDELYR | +3 | 811.3823  | 2431.1250 | 2431.1213 | 0    | 64  | 10 |
| DGFIDKEDLHDMLASLGK   | +2 | 1002.4961 | 2002.9776 | 2002.9669 | 0.01 | 98  | 11 |
| ATSNVFMFDQSQIQEFK    | +2 | 1046.0005 | 2089.9864 | 2089.9778 | 0.01 | 118 | 5  |
| FTDEEVDELYR          | +2 | 708.3203  | 1414.6260 | 1414.6252 | 0    | 81  | 20 |

No. 192. Protein IPI00216699 Matched (SEQUEST MASCOT) Strategy.Y Hits PepMatched(SEQUEST MASCOT) SpectraMatched(SEQUEST MASCOT)  
 192. IPI00216699 Y Y 3 5 9 21 22

\*Des:

Splice Isoform 2 of Unc-112 related protein 2

SEQUEST:(PepMatched Observed.Hits Coverage) 5 18 12.88%

| Seq                       | Charge | Xcor  | Delta | Proability | PepHits |  |  |
|---------------------------|--------|-------|-------|------------|---------|--|--|
| ILEAHQNVAQLSLAEQLR        | +3     | 3.418 | 0.379 | 0.9795     | 1       |  |  |
| VVLAGGVAPALFR             | +2     | 4.285 | 0.664 | 1.0000     | 10      |  |  |
| EKEPEEELYDLSKVVLGGVAPALFR | +4     | 4.799 | 0.646 | 1.0000     | 7       |  |  |
| TMADSSYTSEVQAILAFLSLQR    | +2     | 3.373 | 0.602 | 0.9879     | 2       |  |  |
| LPRPSSLSDKTQLHSR          | +3     | 3.548 | 0.576 | 0.9991     | 7       |  |  |

MASCOT:(PepMatched Observed.Hits Coverage) 9 12 21.92%

| Seq                           | Charge | ObservedMS | ExpectedMS | CalculatedMS |      | Pepscore | PepHits |
|-------------------------------|--------|------------|------------|--------------|------|----------|---------|
| VVLAGGVAPALFR                 | +2     | 635.4310   | 1268.8474  | 1268.7604    | 0.09 | 46       | 2       |
| VTGESHIGGVLLK                 | +2     | 655.4150   | 1308.8154  | 1308.7401    | 0.08 | 63       | 2       |
| TASGDYIDSSWELR                | +2     | 800.4295   | 1598.8444  | 1598.7212    | 0.12 | 68       | 2       |
| LLVPSPEGMSEIYLR               | +2     | 852.5053   | 1702.9960  | 1702.8963    | 0.1  | 59       | 2       |
| SQDEAPGDPIQQLNLK              | +2     | 877.0054   | 1751.9962  | 1751.8690    | 0.13 | 41       | 2       |
| VFVGEEEDPEAESVTLR             | +2     | 888.9886   | 1775.9626  | 1775.8577    | 0.1  | 78       | 2       |
| LEGSAPTDVLDLSTTIPELK          | +2     | 1050.1306  | 2098.2466  | 2098.1045    | 0.14 | 39       | 2       |
| LEGSAPTDVLDLSTTIPELKDHLR      | +4     | 655.8972   | 2619.5597  | 2619.3755    | 0.18 | 73       | 4       |
| TGSGGPGNHPHGPDASAEGLNPYGLVAPR | +3     | 928.1802   | 2781.5188  | 2781.3218    | 0.2  | 76       | 4       |

No. 193. Protein IPI00024911 Matched (SEQUEST MASCOT) Strategy.Y Hits PepMatched(SEQUEST MASCOT) SpectraMatched(SEQUEST MASCOT)  
 193. IPI00024911 Y Y 1 3 3 13 15

\*Des:

Endoplasmic reticulum protein ERp29 precursor

SEQUEST:(PepMatched Observed.Hits Coverage) 3 1 18.42%

| Seq                              | Charge | Xcor  | Delta | Proability | PepHits |  |  |
|----------------------------------|--------|-------|-------|------------|---------|--|--|
| ILDQGEDFPASEMTR                  | +2     | 3.090 | 0.518 | 0.9776     | 1       |  |  |
| LAENSASSDLLLVAEVGISDYGDK         | +2     | 4.542 | 0.594 | 0.9944     | 2       |  |  |
| LAENSASSDLLLVAEVGISDYGDKLNMELSEK | +3     | 4.854 | 0.528 | 1.0000     | 12      |  |  |

MASCOT:(PepMatched Observed.Hits Coverage) 3 1 18.42%

| Seq                              | Charge | ObservedMS | ExpectedMS | CalculatedMS |      | Pepscore | PepHits |
|----------------------------------|--------|------------|------------|--------------|------|----------|---------|
| ILDQGEDFPASEMTR                  | +2     | 854.8967   | 1707.7788  | 1707.7774    | 0    | 70       | 2       |
| LAENSASSDLLLVAEVGISDYGDK         | +2     | 1234.5911  | 2467.1676  | 2467.1601    | 0.01 | 99       | 4       |
| LAENSASSDLLLVAEVGISDYGDKLNMELSEK | +3     | 1138.2166  | 3411.6278  | 3411.6238    | 0    | 113      | 12      |

No. 194. Protein IPI00010438 Matched (SEQUEST MASCOT) Strategy.Y Hits PepMatched(SEQUEST MASCOT) SpectraMatched(SEQUEST MASCOT)  
 194. IPI00010438 Y Y 1 2 4 2 4

\*Des:

SNAP23 protein

SEQUEST:(PepMatched Observed.Hits Coverage) 2 1 19.06%

| Seq | Charge | Xcor | Delta | Proability | PepHits |
|-----|--------|------|-------|------------|---------|
|     |        |      |       |            |         |

| Identified Human Platelet Proteins         |                                             |                              |                 |                              |                                   |           |        |    |          |         |
|--------------------------------------------|---------------------------------------------|------------------------------|-----------------|------------------------------|-----------------------------------|-----------|--------|----|----------|---------|
|                                            | ILGLAIESQDAGIK                              | +2                           | 3.714           | 0.449                        | 0.9892                            | 1         |        |    |          |         |
|                                            | ITNDAREDEMEENLTQVGSILGNLK                   | +3                           |                 | 5.039                        | 0.459                             | 0.9804    | 1      |    |          |         |
| MASCOT:(PepMatched Observed.Hits Coverage) |                                             |                              | 4               | 1                            | 27.44%                            |           |        |    |          |         |
|                                            | Seq                                         | Charge                       | ObservedMS      | ExpectedMS                   | CalculatedMS                      |           |        |    | Pepscore | PepHits |
|                                            | ILGLAIESQDAGIK                              | +2                           | 714.4102        | 1426.8058                    | 1426.8031                         | 0         | 55     | 1  |          |         |
|                                            | TTWGDGGGENSPCNVVS                           | +2                           |                 | 876.3939                     | 1750.7732                         | 1749.7628 | 1.01   | 41 | 1        |         |
|                                            | EDEMEENLTQVGSILGNLK                         | +2                           |                 | 1060.0222                    | 2118.0299                         | 2118.0150 | 0.01   | 58 | 1        |         |
|                                            | ITNDAREDEMEENLTQVGSILGNLK                   | +3                           |                 | 930.4591                     | 2788.3555                         | 2788.3548 | 0      | 51 | 1        |         |
| No. 195.                                   | Protein IPI00000816                         | Matched (SEQUEST MASCOT) Y Y | Strategy.Hits 1 | PepMatched(SEQUEST MASCOT) 4 | SpectraMatched(SEQUEST MASCOT) 3  | 11        | 10     |    |          |         |
| *Des:                                      | 14-3-3 protein epsilon                      |                              |                 |                              |                                   |           |        |    |          |         |
|                                            | SEQUEST:(PepMatched Observed.Hits Coverage) |                              | 4               | 21                           | 23.07%                            |           |        |    |          |         |
|                                            | Seq                                         | Charge                       | Xcor            | Delta                        | Proability                        | PepHits   |        |    |          |         |
|                                            | DNLTWTSMDMQGDGEEQNK                         | +2                           |                 | 5.048                        | 0.604                             | 1.0000    | 2      |    |          |         |
|                                            | DNLTWTSMDMQGDGEEQNKALQDVEDEN                | +3                           |                 |                              | 6.132                             | 0.495     | 1.0000 | 2  |          |         |
|                                            | AAFDDAIAELDTLSEESYK                         | +2                           |                 | 5.307                        | 0.640                             | 1.0000    | 4      |    |          |         |
|                                            | AAFDDAIAELDTLSEESYKDSTLIMQLLR               | +3                           |                 | 4.514                        | 0.541                             | 1.0000    | 1      |    |          |         |
| MASCOT:(PepMatched Observed.Hits Coverage) |                                             |                              | 3               | 15                           | 19.23%                            |           |        |    |          |         |
|                                            | Seq                                         | Charge                       | ObservedMS      | ExpectedMS                   | CalculatedMS                      |           |        |    | Pepscore | PepHits |
|                                            | AAFDDAIAELDTLSEESYK                         | +2                           | 1044.4875       | 2086.9605                    | 2086.9582                         | 0         | 112    | 4  |          |         |
|                                            | DNLTWTSMDMQGDGEEQNK                         | +2                           | 1090.9747       | 2179.9349                    | 2179.9328                         | 0         | 67     | 2  |          |         |
|                                            | AAFDDAIAELDTLSEESYKDSTLIMQLLR               | +3                           |                 | 1086.8749                    | 3257.6028                         | 3257.6013 | 0      | 61 | 2        |         |
| No. 196.                                   | Protein IPI00001545                         | Matched (SEQUEST MASCOT) N Y | Strategy.Hits 1 | PepMatched(SEQUEST MASCOT) 0 | SpectraMatched(SEQUEST MASCOT) 2  | 0         | 2      |    |          |         |
| *Des:                                      | Wiskott-Aldrich syndrome protein            |                              |                 |                              |                                   |           |        |    |          |         |
|                                            | SEQUEST:(PepMatched Observed.Hits Coverage) |                              |                 |                              |                                   |           |        |    |          |         |
|                                            | MASCOT:(PepMatched Observed.Hits Coverage)  |                              | 2               | 1                            | 6.47%                             |           |        |    |          |         |
|                                            | Seq                                         | Charge                       | ObservedMS      | ExpectedMS                   | CalculatedMS                      |           |        |    | Pepscore | PepHits |
|                                            | AGISEAQLTDAETSK                             | +2                           | 760.9189        | 1519.8232                    | 1519.7365                         | 0.09      | 73     | 1  |          |         |
|                                            | LIYDFIEDQGGLEAVR                            | +2                           | 919.5277        | 1837.0408                    | 1836.9257                         | 0.12      | 75     | 1  |          |         |
| No. 197.                                   | Protein IPI00021439                         | Matched (SEQUEST MASCOT) Y Y | Strategy.Hits 3 | PepMatched(SEQUEST MASCOT) 6 | SpectraMatched(SEQUEST MASCOT) 11 | 23        | 125    |    |          |         |
| *Des:                                      | Actin, cytoplasmic 1                        |                              |                 |                              |                                   |           |        |    |          |         |
|                                            | SEQUEST:(PepMatched Observed.Hits Coverage) |                              | 6               | 19                           | 28.53%                            |           |        |    |          |         |
|                                            | Seq                                         | Charge                       | Xcor            | Delta                        | Proability                        | PepHits   |        |    |          |         |
|                                            | MTQIMFETFNTPAMYVAIQAVLSLYASGR               | +3                           |                 | 4.894                        | 0.541                             | 1.0000    | 6      |    |          |         |
|                                            | GYSFTTTAER                                  | +2                           | 2.694           | 0.634                        | 0.9929                            | 5         |        |    |          |         |
|                                            | VAPEEHPVLLTEAPLNPK                          | +2                           |                 | 2.991                        | 0.429                             | 0.9699    | 6      |    |          |         |
|                                            | KDLYANTVLSGGTMYPGIADR                       | +2                           |                 | 4.556                        | 0.513                             | 0.9936    | 3      |    |          |         |
|                                            | LCYVALDFEQEMATAASSSSLEK                     | +2                           |                 | 5.554                        | 0.668                             | 1.0000    | 16     |    |          |         |
|                                            | EKLCYVALDFEQEMATAASSSSLEK                   | +3                           |                 | 4.149                        | 0.488                             | 0.9825    | 3      |    |          |         |
| MASCOT:(PepMatched Observed.Hits Coverage) |                                             |                              | 11              | 20                           | 48.95%                            |           |        |    |          |         |
|                                            | Seq                                         | Charge                       | ObservedMS      | ExpectedMS                   | CalculatedMS                      |           |        |    | Pepscore | PepHits |
|                                            | GYSFTTTAER                                  | +2                           | 566.7667        | 1131.5189                    | 1131.5196                         | 0         | 55     | 8  |          |         |

Identified Human Platelet Proteins

|                               |    |           |           |           |      |     |    |  |  |
|-------------------------------|----|-----------|-----------|-----------|------|-----|----|--|--|
| QEYDESGPSIVHR                 | +2 | 758.8567  | 1515.6988 | 1515.6953 | 0    | 43  | 11 |  |  |
| VAPEEHPVLLTEAPLNPK            | +2 | 977.5357  | 1953.0569 | 1953.0571 | 0    | 79  | 12 |  |  |
| DLYANTVLSGGTTMYPGIADR         | +2 | 1108.0393 | 2214.0641 | 2214.0626 | 0    | 89  | 8  |  |  |
| LCYVALDFEQEMATAASSSSLEK       | +2 | 1247.0824 | 2492.1502 | 2492.1450 | 0.01 | 99  | 32 |  |  |
| EKLCYVALDFEQEMATAASSSSLEK     | +3 | 917.4377  | 2749.2912 | 2749.2826 | 0.01 | 57  | 6  |  |  |
| MTQIMFETFNTPAMYVAIQAVLSLYASGR | +3 | 1085.2094 | 3252.6062 | 3252.6021 | 0    | 62  | 10 |  |  |
| EITALAPSTMK                   | +2 | 581.3122  | 1160.6098 | 1160.6111 | 0    | 50  | 14 |  |  |
| HQGMVGMGQK                    | +2 | 586.2886  | 1170.5627 | 1170.5637 | 0    | 75  | 42 |  |  |
| SYELPDGQVITIGNER              | +2 | 895.9506  | 1789.8866 | 1789.8846 | 0    | 103 | 32 |  |  |
| YSVWIGGSILASLSTFQQMWISK       | +3 | 868.1233  | 2601.3480 | 2601.3301 | 0.02 | 49  | 22 |  |  |

No. 198. Protein IPI00045396 Matched (SEQUEST MASCOT) N Y Strategy.Hits 1 0 PepMatched(SEQUEST MASCOT) 4 0 SpectraMatched(SEQUEST MASCOT) 13

\*Des: Splice Isoform 2 of Calumenin precursor  
 SEQUEST:(PepMatched Observed.Hits Coverage)  
 MASCOT:(PepMatched Observed.Hits Coverage) 4 3 22.74%

| Seq                                        | Charge | ObservedMS | ExpectedMS | CalculatedMS | PepScore  | PepHits |
|--------------------------------------------|--------|------------|------------|--------------|-----------|---------|
| DIVVQETMEDIDK                              | +2     | 767.8695   | 1533.7245  | 1533.7232    | 0         | 2       |
| NADGFIDLEEYIGDMYSHDGNTDEPEWVK              | +3     |            | 1120.4836  | 3358.4291    | 3358.4247 | 0       |
| EEFTAFLHPEEYDYMKDIVVQETMEDIDK              | +3     |            | 1188.8733  | 3563.5980    | 3563.5999 | 0       |
| DIVVQETMEDIDKNADGFIDLEEYIGDMYSHDGNTDEPEWVK | +3     |            | 1625.7216  | 4874.1428    | 4874.1374 | 0.01    |

No. 199. Protein IPI00020567 Matched (SEQUEST MASCOT) N Y Strategy.Hits 1 0 PepMatched(SEQUEST MASCOT) 4 0 SpectraMatched(SEQUEST MASCOT) 4

\*Des: Rho-GTPase-activating protein 1  
 SEQUEST:(PepMatched Observed.Hits Coverage)  
 MASCOT:(PepMatched Observed.Hits Coverage) 4 1 13.64%

| Seq                  | Charge | ObservedMS | ExpectedMS | CalculatedMS | PepScore  | PepHits |
|----------------------|--------|------------|------------|--------------|-----------|---------|
| WDDPYDIAR            | +2     | 657.3396   | 1312.6646  | 1312.5724    | 0.09      | 40      |
| NPEQEPIVLR           | +2     | 702.9364   | 1403.8582  | 1403.7772    | 0.08      | 41      |
| IFYVNYLSELSEHVK      | +3     | 614.3632   | 1840.0678  | 1839.9406    | 0.13      | 46      |
| VPATLQVLQTLPEENYQVLR | +2     |            | 1156.2062  | 2310.3978    | 2310.2583 | 0.14    |

No. 200. Protein IPI00062884 Matched (SEQUEST MASCOT) N Y Strategy.Hits 1 0 PepMatched(SEQUEST MASCOT) 2 0 SpectraMatched(SEQUEST MASCOT) 7

\*Des: CTTN protein  
 SEQUEST:(PepMatched Observed.Hits Coverage)  
 MASCOT:(PepMatched Observed.Hits Coverage) 2 2 5.58%

| Seq                                 | Charge | ObservedMS | ExpectedMS | CalculatedMS | PepScore  | PepHits |
|-------------------------------------|--------|------------|------------|--------------|-----------|---------|
| ASAGHAVSIAQDDAGADDWETDPDFVNDVSEK    | +3     |            | 1111.4877  | 3331.4412    | 3331.4388 | 0       |
| ASAGHAVSIAQDDAGADDWETDPDFVNDVSEKEQR | +3     |            | 1249.2219  | 3744.6439    | 3744.6411 | 0       |

No. 201. Protein IPI00291175 Matched (SEQUEST MASCOT) Y Y Strategy.Hits 2 9 PepMatched(SEQUEST MASCOT) 11 50 SpectraMatched(SEQUEST MASCOT) 118

\*Des: Vinculin  
 SEQUEST:(PepMatched Observed.Hits Coverage) 9 8 12.73%

| Seq | Charge | Xcor | Delta | Probility | PepHits |
|-----|--------|------|-------|-----------|---------|
|-----|--------|------|-------|-----------|---------|

Identified Human Platelet Proteins

| Seq                                        | Charge | ObservedMS | ExpectedMS | CalculatedMS | PepScore | PepHits |
|--------------------------------------------|--------|------------|------------|--------------|----------|---------|
| VMLVNSMNTVK                                | +2     | 3.742      | 0.549      | 0.9939       | 2        |         |
| AQQVSQGLDVLTA                              | +2     | 3.884      | 0.598      | 0.9945       | 2        |         |
| AGEVINQPMMAAR                              | +2     | 3.310      | 0.383      | 0.9741       | 2        |         |
| SLGEISALTSK                                | +2     | 2.982      | 0.487      | 0.9865       | 2        |         |
| LLAVAATAPPDAPNREEVFDER                     | +3     |            | 3.333      | 0.501        | 0.9781   | 3       |
| MLGQMTDQVADLR                              | +2     | 4.449      | 0.633      | 1.0000       | 2        |         |
| MALLMAEMSR                                 | +2     | 3.822      | 0.341      | 0.9840       | 2        |         |
| VLQLTSWDEDAWASK                            | +2     | 4.825      | 0.581      | 1.0000       | 2        |         |
| GILSGTSDLLLLTFDEAEVR                       | +2     | 5.814      | 0.641      | 1.0000       | 2        |         |
| MASCOT:(PepMatched Observed.Hits Coverage) |        | 11         | 13         | 15.95%       |          |         |
| Seq                                        | Charge | ObservedMS | ExpectedMS | CalculatedMS | PepScore | PepHits |
| SLGEISALTSK                                | +2     | 553.3076   | 1104.6007  | 1104.6026    | 0        | 55      |
| MALLMAEMSR                                 | +2     | 576.7817   | 1151.5489  | 1151.5501    | 0        | 77      |
| ELLPVLISAMK                                | +2     | 607.3640   | 1212.7134  | 1212.7151    | 0        | 48      |
| WIDNPTVDDR                                 | +2     | 615.7902   | 1229.5658  | 1229.5677    | 0        | 41      |
| AQQVSQGLDVLTA                              | +2     | 729.4012   | 1456.7878  | 1456.7885    | 0        | 60      |
| MLGQMTDQVADLR                              | +2     | 739.3603   | 1476.7060  | 1476.7065    | 0        | 83      |
| AGEVINQPMMAAR                              | +2     | 759.8654   | 1517.7163  | 1517.7152    | 0        | 43      |
| VLQLTSWDEDAWASK                            | +2     | 874.9310   | 1747.8474  | 1747.8417    | 0.01     | 50      |
| GILSGTSDLLLLTFDEAEVR                       | +2     | 1018.5332  | 2035.0519  | 2035.0473    | 0        | 98      |
| LLAVAATAPPDAPNREEVFDER                     | +3     | 794.4083   | 2380.2030  | 2380.2022    | 0        | 62      |
| KIDAAQNWLADPNNGPEGEEQIR                    | +3     | 837.0708   | 2508.1906  | 2507.2040    | 0.99     | 49      |

No. 202. Protein IPI00180675 Matched (SEQUEST MASCOT) Strategy.Hits PepMatched(SEQUEST MASCOT) SpectraMatched(SEQUEST MASCOT)  
 N Y 1 0 4 0 10

\*Des: Tubulin alpha-3 chain

| Seq                                         | Charge | ObservedMS | ExpectedMS | CalculatedMS | PepScore | PepHits |
|---------------------------------------------|--------|------------|------------|--------------|----------|---------|
| SEQUEST:(PepMatched Observed.Hits Coverage) |        |            |            |              |          |         |
| MASCOT:(PepMatched Observed.Hits Coverage)  |        | 4          | 2          | 16.77%       |          |         |
| Seq                                         | Charge | ObservedMS | ExpectedMS | CalculatedMS | PepScore | PepHits |
| AVFVDLEPTVIDEVR                             | +2     | 851.4565   | 1700.8984  | 1700.8984    | 0        | 72      |
| TIGGGDDSFNTFFSETGAGK                        | +2     | 1004.4591  | 2006.9037  | 2006.8857    | 0.02     | 53      |
| AFVHWYVGEEMEEGFSEAR                         | +3     | 777.3422   | 2329.0048  | 2329.0109    | 0        | 50      |
| VGINYQPPTVPPGGDLAK                          | +2     | 912.9968   | 1823.9790  | 1823.9781    | 0        | 51      |

No. 203. Protein IPI00014581 Matched (SEQUEST MASCOT) Strategy.Hits PepMatched(SEQUEST MASCOT) SpectraMatched(SEQUEST MASCOT)  
 Y N 1 2 0 2 0

\*Des: Splice Isoform 1 of Tropomyosin 1 alpha chain

| Seq                                         | Charge | Xcor  | Delta | Probability | PepHits |
|---------------------------------------------|--------|-------|-------|-------------|---------|
| SEQUEST:(PepMatched Observed.Hits Coverage) |        |       |       |             | 11.76%  |
| MASCOT:(PepMatched Observed.Hits Coverage)  |        | 2     | 1     |             |         |
| Seq                                         | Charge | Xcor  | Delta | Probability | PepHits |
| GTEDELDKYSEALKDAQEK                         | +3     | 4.218 | 0.489 | 0.9973      | 2       |
| SIDDLEDELYAQK                               | +2     | 3.088 | 0.448 | 0.9853      | 2       |

No. 204. Protein IPI00383237 Matched (SEQUEST MASCOT) Strategy.Hits PepMatched(SEQUEST MASCOT) SpectraMatched(SEQUEST MASCOT)  
 N Y 3 0 15 0 53

\*Des: Pyruvate kinase M2

SEQUEST:(PepMatched Observed.Hits Coverage)

Identified Human Platelet Proteins

| MASCOT:(PepMatched Observed.Hits Coverage) | 15     | 6          | 38.58%     |              |       |     |    |  |          |         |
|--------------------------------------------|--------|------------|------------|--------------|-------|-----|----|--|----------|---------|
| Seq                                        | Charge | ObservedMS | ExpectedMS | CalculatedMS |       |     |    |  | PepScore | PepHits |
| GSQTAEVELK                                 | +2     | 495.8275   | 989.6404   | 989.5029     | 0.14  | 38  | 1  |  |          |         |
| GDYPLEAVR                                  | +2     | 510.3106   | 1018.6066  | 1018.5083    | 0.1   | 38  | 5  |  |          |         |
| IYVDDGLISLQVK                              | +2     | 731.9493   | 1461.8840  | 1461.8078    | 0.08  | 42  | 13 |  |          |         |
| GVNLPGAAVDLPAVSEK                          | +2     | 818.9829   | 1635.9512  | 1635.8831    | 0.07  | 71  | 1  |  |          |         |
| FGVEQDVMVFASFIR                            | +2     | 930.5089   | 1859.0032  | 1858.8923    | 0.11  | 88  | 1  |  |          |         |
| LAPITSDPTEATAVGAVEASFK                     | +3     | 725.7452   | 2174.2138  | 2174.1106    | 0.1   | 108 | 15 |  |          |         |
| GVNLPGAAVDLPAVSEKDIQDLK                    | +3     | 783.7833   | 2348.3281  | 2348.2587    | 0.07  | 50  | 3  |  |          |         |
| APIIAVTR                                   | +2     | 420.7907   | 839.5668   | 839.5229     | 0.04  | 39  | 9  |  |          |         |
| VNFAMNVGK                                  | +2     | 490.2723   | 978.5300   | 978.4956     | 0.03  | 52  | 7  |  |          |         |
| GDLGIEIPAEK                                | +2     | 571.3299   | 1140.6452  | 1140.6026    | 0.04  | 45  | 7  |  |          |         |
| ITLDNAYMEK                                 | +2     | 599.3171   | 1196.6196  | 1196.5747    | 0.04  | 49  | 3  |  |          |         |
| LDIDSPPIAR                                 | +2     | 599.3475   | 1196.6804  | 1196.6401    | 0.04  | 60  | 27 |  |          |         |
| KGVNLPGAAVDLPAVSEK                         | +3     | 589.0341   | 1764.0805  | 1763.9781    | 0.1   | 37  | 3  |  |          |         |
| GADFLVTEVENGGSLGSK                         | +2     | 890.4249   | 1778.8352  | 1778.8686    | -0.02 | 87  | 21 |  |          |         |
| LNFSHGTHEYHAETIK                           | +3     | 628.6772   | 1883.0098  | 1882.8962    | 0.11  | 44  | 11 |  |          |         |

No. 205. Protein IPI00219757 Matched (SEQUEST MASCOT) N Y Strategy.Hits 1 0 PepMatched(SEQUEST MASCOT) 2 0 SpectraMatched(SEQUEST MASCOT) 4

\*Des: Glutathione S-transferase P

| SEQUEST:(PepMatched Observed.Hits Coverage) | 2      | 2          | 12.67%     |              |   |     |   |  |          |         |
|---------------------------------------------|--------|------------|------------|--------------|---|-----|---|--|----------|---------|
| MASCOT:(PepMatched Observed.Hits Coverage)  | 2      | 1          | 8.69%      |              |   |     |   |  | PepScore | PepHits |
| Seq                                         | Charge | ObservedMS | ExpectedMS | CalculatedMS |   |     |   |  |          |         |
| DQQAALVDMVNDGVEDLR                          | +2     | 1058.9949  | 2115.9752  | 2115.9742    | 0 | 136 | 5 |  |          |         |
| TLGLYGKQQAALVDMVNDGVEDLR                    | +3     | 950.4719   | 2848.3938  | 2848.3912    | 0 | 69  | 1 |  |          |         |

No. 206. Protein IPI00180173 Matched (SEQUEST MASCOT) N Y Strategy.Hits 1 0 PepMatched(SEQUEST MASCOT) 2 0 SpectraMatched(SEQUEST MASCOT) 2

\*Des: PREDICTED: similar to tropomyosin 4

| SEQUEST:(PepMatched Observed.Hits Coverage) | 2      | 1          | 8.69%      |              |   |    |   |  |          |         |
|---------------------------------------------|--------|------------|------------|--------------|---|----|---|--|----------|---------|
| MASCOT:(PepMatched Observed.Hits Coverage)  | 2      | 1          | 8.69%      |              |   |    |   |  | PepScore | PepHits |
| Seq                                         | Charge | ObservedMS | ExpectedMS | CalculatedMS |   |    |   |  |          |         |
| MEIQELQLK                                   | +2     | 566.3069   | 1130.5992  | 1130.6005    | 0 | 62 | 1 |  |          |         |
| DEEKMEIQELQLK                               | +2     | 816.9116   | 1631.8086  | 1631.8076    | 0 | 47 | 1 |  |          |         |

No. 207. Protein IPI00021440 Matched (SEQUEST MASCOT) N Y Strategy.Hits 2 0 PepMatched(SEQUEST MASCOT) 20 0 SpectraMatched(SEQUEST MASCOT) 1016

\*Des: Actin, cytoplasmic 2

| SEQUEST:(PepMatched Observed.Hits Coverage) | 20     | 6          | 52.87%     |              |      |     |    |  |          |         |
|---------------------------------------------|--------|------------|------------|--------------|------|-----|----|--|----------|---------|
| MASCOT:(PepMatched Observed.Hits Coverage)  | 20     | 6          | 52.87%     |              |      |     |    |  | PepScore | PepHits |
| Seq                                         | Charge | ObservedMS | ExpectedMS | CalculatedMS |      |     |    |  |          |         |
| VAPEEHPVLLTEAPLNPK                          | +2     | 977.5349   | 1953.0551  | 1953.0571    | 0    | 88  | 47 |  |          |         |
| VAPEEHPVLLTEAPLNPKANR                       | +2     | 1148.1279  | 2294.2413  | 2294.2382    | 0    | 76  | 27 |  |          |         |
| VAPEEHPVLLTEAPLNPKANREK                     | +3     | 851.4678   | 2551.3815  | 2551.3757    | 0.01 | 53  | 20 |  |          |         |
| DLYANTVLSGGTTMYPGIADR                       | +2     | 1108.0408  | 2214.0670  | 2214.0626    | 0    | 118 | 44 |  |          |         |
| KDLYANTVLSGGTTMYPGIADR                      | +2     | 1172.0881  | 2342.1617  | 2342.1576    | 0    | 96  | 13 |  |          |         |

Identified Human Platelet Proteins

|                                    |    |           |           |           |      |     |     |
|------------------------------------|----|-----------|-----------|-----------|------|-----|-----|
| MTQIMFETFNTPAMYVAIQAVLSLYASGR      | +3 | 1085.2140 | 3252.6201 | 3252.6021 | 0.02 | 61  | 5   |
| EITALAPSTMK                        | +2 | 581.3126  | 1160.6106 | 1160.6111 | 0    | 58  | 64  |
| HQGVMVGMGQK                        | +2 | 586.2894  | 1170.5642 | 1170.5637 | 0    | 74  | 141 |
| DSYVGDEAQSQR                       | +2 | 677.8165  | 1353.6185 | 1353.6160 | 0    | 66  | 18  |
| EITALAPSTMKIK                      | +2 | 701.9026  | 1401.7906 | 1401.7901 | 0    | 52  | 92  |
| MQKEITALAPSTMK                     | +2 | 774.9111  | 1547.8077 | 1547.8051 | 0    | 110 | 201 |
| MQKEITALAPSTMKIK                   | +2 | 895.5002  | 1788.9858 | 1788.9841 | 0    | 103 | 161 |
| SYELPDGQVITIGNER                   | +2 | 895.9505  | 1789.8864 | 1789.8846 | 0    | 94  | 89  |
| HQGVMVGMGQKDSYVGDEAQSQR            | +2 | 1176.0430 | 2350.0714 | 2350.0681 | 0    | 123 | 136 |
| HQGVMVGMGQKDSYVGDEAQSQR            | +2 | 1254.0924 | 2506.1703 | 2506.1692 | 0    | 93  | 120 |
| AGFAGDDAPR                         | +2 | 488.7283  | 975.4421  | 975.4410  | 0    | 85  | 106 |
| AVFPSIVGRPR                        | +2 | 599.8562  | 1197.6979 | 1197.6982 | 0    | 75  | 136 |
| AGFAGDDAPRAVFPSIVGRPR              | +3 | 719.3806  | 2155.1198 | 2155.1286 | 0    | 78  | 137 |
| AVFPSIVGRPRHQGVMVGMGQKDSYVGDEAQSQR | +3 | 1177.5944 | 3529.7613 | 3529.7557 | 0.01 | 59  | 3   |
| IKIIPPERK                          | +2 | 582.8753  | 1163.7361 | 1163.7390 | 0    | 43  | 49  |

|          |                                                       |                          |               |                            |                                    |
|----------|-------------------------------------------------------|--------------------------|---------------|----------------------------|------------------------------------|
| No. 208. | Protein                                               | Matched (SEQUEST MASCOT) | Strategy.Hits | PepMatched(SEQUEST MASCOT) | SpectraMatched(SEQUEST MASCOT)     |
|          | IPI00550697                                           | N Y                      | 1             | 0 2                        | 0 39                               |
| *Des:    | Cortactin, isoform b                                  |                          |               |                            |                                    |
|          | SEQUEST:(PepMatched Observed.Hits Coverage)           |                          |               |                            |                                    |
|          | MASCOT:(PepMatched Observed.Hits Coverage) 2 10 6.89% |                          |               |                            |                                    |
|          | Seq                                                   | Charge                   | ObservedMS    | ExpectedMS                 | CalculatedMS                       |
|          | ASAGHAVSIAQDDAGADDWETDPDFVNDVSEK                      | +3                       |               |                            | 1111.4918 3331.4536 3331.4388 0.01 |
|          | ASAGHAVSIAQDDAGADDWETDPDFVNDVSEKEQR                   | +3                       |               |                            | 1249.2179 3744.6319 3744.6411 0    |
|          |                                                       |                          |               |                            | Pepscore PepHits                   |
|          |                                                       |                          |               |                            | 80 11                              |
|          |                                                       |                          |               |                            | 72 5                               |

|          |                                                        |                          |               |                            |                                |
|----------|--------------------------------------------------------|--------------------------|---------------|----------------------------|--------------------------------|
| No. 209. | Protein                                                | Matched (SEQUEST MASCOT) | Strategy.Hits | PepMatched(SEQUEST MASCOT) | SpectraMatched(SEQUEST MASCOT) |
|          | IPI00440493                                            | N Y                      | 1             | 0 13                       | 0 19                           |
| *Des:    | ATP synthase alpha chain, mitochondrial precursor      |                          |               |                            |                                |
|          | SEQUEST:(PepMatched Observed.Hits Coverage)            |                          |               |                            |                                |
|          | MASCOT:(PepMatched Observed.Hits Coverage) 13 1 33.57% |                          |               |                            |                                |
|          | Seq                                                    | Charge                   | ObservedMS    | ExpectedMS                 | CalculatedMS                   |
|          | AVDSLVPGR                                              | +2                       | 513.8345      | 1025.6544 1025.5869        | 0.07 48 1                      |
|          | GYLDKLEPSK                                             | +2                       | 575.3450      | 1148.6754 1148.6077        | 0.07 46 1                      |
|          | VVDALGNAIDGK                                           | +2                       | 586.3602      | 1170.7058 1170.6244        | 0.08 69 3                      |
|          | HALIYDDLSK                                             | +2                       | 644.3997      | 1286.7848 1286.6870        | 0.1 45 1                       |
|          | TSIAIDTIINQK                                           | +2                       | 658.9146      | 1315.8146 1315.7347        | 0.08 46 1                      |
|          | TGTAEMSSILEER                                          | +2                       | 712.3795      | 1422.7444 1422.6660        | 0.08 93 1                      |
|          | EAYPGDVFYLHSR                                          | +2                       | 777.4263      | 1552.8380 1552.7310        | 0.11 75 1                      |
|          | TGAIVDVPVGEELLGR                                       | +2                       | 812.9658      | 1623.9170 1623.8831        | 0.03 58 1                      |
|          | VVDALGNAIDGKGPISK                                      | +3                       | 571.0235      | 1710.0487 1709.9311        | 0.12 41 1                      |
|          | QQQYSPMAIEEQVAVIYAGVR                                  | +2                       | 1155.1569     | 2308.2992 2308.1521        | 0.15 74 1                      |
|          | VLSIGDGIAR                                             | +2                       | 500.8257      | 999.6368 999.5712          | 0.07 53 3                      |
|          | EVAAFQFGSDLDAATQQLLSR                                  | +2                       | 1169.6398     | 2337.2650 2337.1600        | 0.11 94 3                      |
|          | FENAFSLHVVSQHQALLGTIR                                  | +4                       | 592.5941      | 2366.3473 2366.2494        | 0.1 69 3                       |

|          |             |                          |               |                            |                                |
|----------|-------------|--------------------------|---------------|----------------------------|--------------------------------|
| No. 210. | Protein     | Matched (SEQUEST MASCOT) | Strategy.Hits | PepMatched(SEQUEST MASCOT) | SpectraMatched(SEQUEST MASCOT) |
|          | IPI00514912 | N Y                      | 1             | 0 2                        | 0 9                            |



Identified Human Platelet Proteins

\*Des: 68 kDa protein  
 SEQUEST:(PepMatched Observed.Hits Coverage)  
 MASCOT:(PepMatched Observed.Hits Coverage) 2 1 8.51%  
 Seq Charge ObservedMS ExpectedMS CalculatedMS Pepscore PepHits  
 FYPEDVSEELIQDITQR +2 1041.5057 2080.9969 2080.9953 0 49 5  
 TAMSTPHVAEPAENEQDEQDENGAEASADLR +3 1105.1395 3312.3967 3311.4120 0.98 75 6

No. Protein Matched (SEQUEST MASCOT) Strategy.Hits PepMatched(SEQUEST MASCOT) SpectraMatched(SEQUEST MASCOT)  
 211. IPI00257508 N Y 1 0 4 0 4

\*Des: Dihydropyrimidinase related protein-2  
 SEQUEST:(PepMatched Observed.Hits Coverage)  
 MASCOT:(PepMatched Observed.Hits Coverage) 4 1 11.85%  
 Seq Charge ObservedMS ExpectedMS CalculatedMS Pepscore PepHits  
 QIGENLIVPGGVK +2 662.4218 1322.8290 1322.7557 0.07 64 1  
 MDENQFVAVTSTNAAK +2 863.4636 1724.9126 1724.8039 0.11 35 1  
 DNFTLIPEGTNGTEER +2 896.9856 1791.9566 1791.8275 0.13 60 1  
 NLHQSGFSLSGAQIDDNIPR +3 723.7461 2168.2165 2168.0610 0.16 51 1

No. Protein Matched (SEQUEST MASCOT) Strategy.Hits PepMatched(SEQUEST MASCOT) SpectraMatched(SEQUEST MASCOT)  
 212. IPI0021885 Y Y 3 8 10 22 63

\*Des: Splice Isoform Alpha-E of Fibrinogen alpha/alpha-E chain precursor  
 SEQUEST:(PepMatched Observed.Hits Coverage) 8 22 17.13%  
 Seq Charge Xcor Delta Probility PepHits  
 NPSSAGSWNSGSSGPGSTGNR +2 2.919 0.500 0.9830 2  
 HRHPDEAAFFDTASTGK +3 3.210 0.471 0.9738 1  
 MKPVPDLVPGNFK +2 2.862 0.361 0.9563 2  
 EVDLKDYEDQQKLEQVIK +3 3.729 0.387 0.9539 2  
 GLIDEVNQDFTNR +2 3.607 0.552 0.9928 2  
 DSDWPFCSDDEDWNYK +2 4.636 0.709 1.0000 5  
 DSHSLTTNIMEILR +2 3.001 0.511 0.9859 2  
 EVVTSEDGSDCPEAMD LGTSLGIGTLDGFR +3 5.031 0.581 1.0000 11  
 MASCOT:(PepMatched Observed.Hits Coverage) 10 23 17.36%  
 Seq Charge ObservedMS ExpectedMS CalculatedMS Pepscore PepHits  
 VQHIQLLQK +2 553.8370 1105.6595 1105.6608 0 49 8  
 MKPVPDLVPGNFK +2 721.3981 1440.7817 1440.7798 0 42 4  
 MELERPGGNEITR +3 501.2514 1500.7325 1500.7354 0 44 6  
 EVDLKDYEDQQK +2 755.3571 1508.6997 1508.6994 0 47 5  
 NPSSAGSWNSGSSGPGSTGNR +2 982.4252 1962.8359 1962.8415 0 51 4  
 EVVTSEDGSDCPEAMD LGTSLGIGTLDGFR +2 1536.1957 3070.3768 3070.3746 0 112 22  
 EVTKEVVTSEDGSDCPEAMD LGTSLGIGTLDGFR +3 1176.8853 3527.6339 3527.6283 0.01 87 16  
 GLIDEVNQDFTNR +2 760.8702 1519.7259 1519.7266 0 89 5  
 DSHSLTTNIMEILR +2 815.4160 1628.8174 1628.8192 0 58 5  
 DSDWPFCSDDEDWNYK +2 953.8657 1905.7168 1905.7152 0 67 14

No. Protein Matched (SEQUEST MASCOT) Strategy.Hits PepMatched(SEQUEST MASCOT) SpectraMatched(SEQUEST MASCOT)  
 213. IPI00553177 N Y 1 0 5 0 5

\*Des: Alpha-1-antitrypsin precursor

Identified Human Platelet Proteins

| No.   | Protein                                                | Matched (SEQUEST MASCOT) | Strategy   | Hits       | PepMatched (SEQUEST MASCOT) | SpectraMatched (SEQUEST MASCOT) |
|-------|--------------------------------------------------------|--------------------------|------------|------------|-----------------------------|---------------------------------|
| 214.  | IPI00297579                                            | N                        | Y          | 1          | 0                           | 2                               |
| *Des: | Chromobox protein homolog 3                            |                          |            |            |                             |                                 |
|       | SEQUEST:(PepMatched Observed.Hits Coverage)            |                          |            |            |                             |                                 |
|       | MASCOT:(PepMatched Observed.Hits Coverage) 5 1 16.7%   |                          |            |            |                             |                                 |
|       | Seq                                                    | Charge                   | ObservedMS | ExpectedMS | CalculatedMS                | PepScore PepHits                |
|       | SVLGQLGITK                                             | +2                       | 508.3446   | 1014.6746  | 1014.6073 0.07              | 41 1                            |
|       | LSSWVLLMK                                              | +2                       | 538.8490   | 1075.6834  | 1075.6100 0.07              | 60 1                            |
|       | ITPNLAEFASFSLYR                                        | +2                       | 821.4835   | 1640.9524  | 1640.8562 0.1               | 64 1                            |
|       | LQHLENELTHDIITK                                        | +3                       | 602.0286   | 1803.0640  | 1802.9526 0.11              | 36 3                            |
|       | VFSNGADLSGVTEEAPLK                                     | +2                       | 917.5144   | 1833.0142  | 1832.9155 0.1               | 90 1                            |
| 215.  | IPI0023122                                             | N                        | Y          | 1          | 0                           | 2                               |
| *Des: | Enigma protein, isoform 1                              |                          |            |            |                             |                                 |
|       | SEQUEST:(PepMatched Observed.Hits Coverage)            |                          |            |            |                             |                                 |
|       | MASCOT:(PepMatched Observed.Hits Coverage) 2 1 5.16%   |                          |            |            |                             |                                 |
|       | Seq                                                    | Charge                   | ObservedMS | ExpectedMS | CalculatedMS                | PepScore PepHits                |
|       | VEEAPEEFVVEK                                           | +2                       | 767.3702   | 1532.7258  | 1532.7245 0                 | 46 3                            |
|       | GFTDADNTWEPEENLDCPELIEAFLNSQK                          | +3                       | 1109.1669  | 3324.4788  | 3324.4768 0                 | 64 1                            |
| 216.  | IPI00015103                                            | N                        | Y          | 1          | 0                           | 2                               |
| *Des: | Hypothetical protein FLJ20248                          |                          |            |            |                             |                                 |
|       | SEQUEST:(PepMatched Observed.Hits Coverage)            |                          |            |            |                             |                                 |
|       | MASCOT:(PepMatched Observed.Hits Coverage) 2 1 10.07%  |                          |            |            |                             |                                 |
|       | Seq                                                    | Charge                   | ObservedMS | ExpectedMS | CalculatedMS                | PepScore PepHits                |
|       | DVIEEQEEQMAEFYR                                        | +2                       | 958.4230   | 1914.8315  | 1914.8305 0                 | 61 2                            |
|       | NDGTVGDLAQLQNGSDLQFIEMQR                               | +3                       | 860.4069   | 2578.1989  | 2577.2128 0.99              | 52 3                            |
| 217.  | IPI00220301                                            | Y                        | Y          | 1          | 2                           | 4                               |
| *Des: | Peroxisome oxidoreductin 6                             |                          |            |            |                             |                                 |
|       | SEQUEST:(PepMatched Observed.Hits Coverage) 2 2 18.06% |                          |            |            |                             |                                 |
|       | Seq                                                    | Charge                   | Xcor       | Delta      | Probability                 | PepHits                         |
|       | DGDSVMVLPTIPEEEAK                                      | +2                       | 3.059      | 0.449      | 0.9536                      | 2                               |
|       | DINAYNCEEPTEKLPFIIDDR                                  | +3                       | 4.263      | 0.407      | 0.9803                      | 2                               |
|       | MASCOT:(PepMatched Observed.Hits Coverage) 4 3 25.99%  |                          |            |            |                             |                                 |
|       | Seq                                                    | Charge                   | ObservedMS | ExpectedMS | CalculatedMS                | PepScore PepHits                |
|       | DINAYNCEEPTEK                                          | +2                       | 763.3287   | 1524.6429  | 1524.6402 0                 | 49 1                            |
|       | DGDSVMVLPTIPEEEAK                                      | +2                       | 915.4467   | 1828.8788  | 1828.8764 0                 | 77 6                            |

Identified Human Platelet Proteins

|                        |    |          |           |           |   |    |   |
|------------------------|----|----------|-----------|-----------|---|----|---|
| ELAILLGMLDPAEKDEK      | +2 | 943.0038 | 1883.9931 | 1883.9913 | 0 | 56 | 5 |
| DINAYNCEEPTEKLPFPIIDDR | +3 | 864.7493 | 2591.2260 | 2591.2213 | 0 | 42 | 4 |

|          |                                                                                 |                          |               |                            |                                |          |                |
|----------|---------------------------------------------------------------------------------|--------------------------|---------------|----------------------------|--------------------------------|----------|----------------|
| No. 218. | Protein                                                                         | Matched (SEQUEST MASCOT) | Strategy.Hits | PepMatched(SEQUEST MASCOT) | SpectraMatched(SEQUEST MASCOT) |          |                |
|          | IPI00014230                                                                     | Y Y                      | 1 3           | 3 7                        | 7                              |          |                |
| *Des:    | Complement component 1, Q subcomponent binding protein, mitochondrial precursor |                          |               |                            |                                |          |                |
|          | SEQUEST:(PepMatched Observed.Hits Coverage)                                     | 3 4                      |               | 29.96%                     |                                |          |                |
|          | Seq                                                                             | Charge                   | Xcor          | Delta                      | Proability                     | PepHits  |                |
|          | ALVLDCHYPEDEVGQEDEAESDIFSIR                                                     |                          |               |                            | +3                             | 5.762    | 0.547 1.0000 4 |
|          | DTNYTLNTDSLWALYDHLMDFLADR                                                       |                          |               |                            | +3                             | 5.009    | 0.431 0.9971 1 |
|          | GVDNTFADELVELSTALEHQEYITFLEDLK                                                  |                          |               |                            | +3                             | 4.993    | 0.503 0.9988 2 |
|          | MASCOT:(PepMatched Observed.Hits Coverage)                                      | 3 5                      |               | 29.96%                     |                                |          |                |
|          | Seq                                                                             | Charge                   | ObservedMS    | ExpectedMS                 | CalculatedMS                   | Pepscore | PepHits        |
|          | ALVLDCHYPEDEVGQEDEAESDIFSIR                                                     |                          | +3            | 1027.1283                  | 3078.3631 3078.3763            | 0        | 49 3           |
|          | DTNYTLNTDSLWALYDHLMDFLADR                                                       |                          | +3            | 1040.1437                  | 3117.4092 3117.4026            | 0.01     | 52 1           |
|          | GVDNTFADELVELSTALEHQEYITFLEDLK                                                  |                          | +3            | 1147.2391                  | 3438.6956 3438.6718            | 0.02     | 83 3           |

|          |                                             |                          |               |                            |                                |          |         |
|----------|---------------------------------------------|--------------------------|---------------|----------------------------|--------------------------------|----------|---------|
| No. 219. | Protein                                     | Matched (SEQUEST MASCOT) | Strategy.Hits | PepMatched(SEQUEST MASCOT) | SpectraMatched(SEQUEST MASCOT) |          |         |
|          | IPI00472762                                 | N Y                      | 1 0           | 2 0                        | 82                             |          |         |
| *Des:    | IGHG1 protein                               |                          |               |                            |                                |          |         |
|          | SEQUEST:(PepMatched Observed.Hits Coverage) | 2 1                      |               | 7.38%                      |                                |          |         |
|          | MASCOT:(PepMatched Observed.Hits Coverage)  | 2 1                      |               | 7.38%                      |                                |          |         |
|          | Seq                                         | Charge                   | ObservedMS    | ExpectedMS                 | CalculatedMS                   | Pepscore | PepHits |
|          | VVSVLTVLHQDWLNGK                            |                          | +3            | 603.3766                   | 1807.1080 1806.9992            | 0.11     | 47 41   |
|          | TTPPVLDSDGSFFLYSK                           |                          | +2            | 937.5223                   | 1873.0300 1872.9145            | 0.12     | 49 41   |

|          |                                                                       |                          |               |                            |                                |          |         |
|----------|-----------------------------------------------------------------------|--------------------------|---------------|----------------------------|--------------------------------|----------|---------|
| No. 220. | Protein                                                               | Matched (SEQUEST MASCOT) | Strategy.Hits | PepMatched(SEQUEST MASCOT) | SpectraMatched(SEQUEST MASCOT) |          |         |
|          | IPI00218604                                                           | N Y                      | 1 0           | 7 0                        | 21                             |          |         |
| *Des:    | Splice Isoform 1 of Tyrosine-protein phosphatase, non-receptor type 6 |                          |               |                            |                                |          |         |
|          | SEQUEST:(PepMatched Observed.Hits Coverage)                           | 7 1                      |               | 19%                        |                                |          |         |
|          | MASCOT:(PepMatched Observed.Hits Coverage)                            | 7 1                      |               | 19%                        |                                |          |         |
|          | Seq                                                                   | Charge                   | ObservedMS    | ExpectedMS                 | CalculatedMS                   | Pepscore | PepHits |
|          | DLSGLDAETLLK                                                          |                          | +2            | 637.8793                   | 1273.7440 1273.6765            | 0.07     | 66 3    |
|          | AGFWEFESLQK                                                           |                          | +2            | 735.8950                   | 1469.7754 1469.6826            | 0.09     | 62 3    |
|          | TLQVSPLDNGDLIR                                                        |                          | +2            | 770.9576                   | 1539.9006 1539.8256            | 0.08     | 72 3    |
|          | IQNSGDFYDLYGGEK                                                       |                          | +2            | 853.4422                   | 1704.8698 1704.7631            | 0.11     | 98 3    |
|          | DSNIPGSDYINANYIK                                                      |                          | +2            | 892.4777                   | 1782.9408 1782.8424            | 0.1      | 42 3    |
|          | ESLSQPGDFVLSVLSQPK                                                    |                          | +2            | 1023.5845                  | 2045.1544 2045.0316            | 0.12     | 54 3    |
|          | YTVGGLETFDSLTDLVEHFK                                                  |                          | +3            | 757.7602                   | 2270.2588 2270.1106            | 0.15     | 45 3    |

|          |                                             |                          |               |                            |                                |         |   |
|----------|---------------------------------------------|--------------------------|---------------|----------------------------|--------------------------------|---------|---|
| No. 221. | Protein                                     | Matched (SEQUEST MASCOT) | Strategy.Hits | PepMatched(SEQUEST MASCOT) | SpectraMatched(SEQUEST MASCOT) |         |   |
|          | IPI00013508                                 | Y Y                      | 3 7           | 7 26                       | 21                             |         |   |
| *Des:    | Alpha-actinin 1                             |                          |               |                            |                                |         |   |
|          | SEQUEST:(PepMatched Observed.Hits Coverage) | 7 22                     |               | 14.22%                     |                                |         |   |
|          | Seq                                         | Charge                   | Xcor          | Delta                      | Proability                     | PepHits |   |
|          | MLDAEDIVGTARPDEK                            |                          | +3            | 3.246                      | 0.408                          | 0.9969  | 4 |
|          | VLAVNQENEQLMEDYEK                           |                          | +2            | 5.453                      | 0.639                          | 1.0000  | 4 |

Identified Human Platelet Proteins

| Seq                                        | Charge | ObservedMS | ExpectedMS | CalculatedMS | PepScore | PepHits |
|--------------------------------------------|--------|------------|------------|--------------|----------|---------|
| ETADTDTADQVMASFK                           | +2     | 4.343      | 0.657      | 1.0000       | 2        |         |
| DDPLTNLNTAFDVAEK                           | +2     | 5.064      | 0.377      | 0.9918       | 4        |         |
| IDQLEGDHQLIQEALIFDNK                       | +3     | 3.979      | 0.466      | 0.9991       | 1        |         |
| VEQIAAIAQELNELDYDPSVNR                     | +3     | 5.307      | 0.459      | 0.9994       | 3        |         |
| LMLLLEVISGER                               | +2     | 4.287      | 0.556      | 0.9963       | 2        |         |
| MASCOT:(PepMatched Observed.Hits Coverage) |        |            | 7          | 22           | 14.22%   |         |
| Seq                                        | Charge | ObservedMS | ExpectedMS | CalculatedMS | PepScore | PepHits |
| ETADTDTADQVMASFK                           | +2     | 865.3847   | 1728.7549  | 1728.7512    | 0        | 97      |
| MLDAEDIVGTARPDEK                           | +2     | 880.4315   | 1758.8485  | 1758.8458    | 0        | 60      |
| DDPLTNLNTAFDVAEK                           | +2     | 881.9293   | 1761.8440  | 1761.8421    | 0        | 67      |
| VLAVNQENEQLMEDYEK                          | +2     | 1026.4838  | 2050.9530  | 2050.9517    | 0        | 81      |
| IDQLEGDHQLIQEALIFDNK                       | +3     | 780.4013   | 2338.1821  | 2338.1804    | 0        | 41      |
| VEQIAAIAQELNELDYDPSVNR                     | +3     | 936.7988   | 2807.3745  | 2807.3613    | 0.01     | 42      |
| LMLLLEVISGER                               | +2     | 686.8974   | 1371.7802  | 1371.7795    | 0        | 90      |

No. 222. Protein IPI00021458 Matched (SEQUEST MASCOT) Strategy.Hits PepMatched(SEQUEST MASCOT) SpectraMatched(SEQUEST MASCOT)  
 Y Y 1 2 2 5 4

\*Des: EH-domain containing protein 3

| Seq                                         | Charge | Xcor       | Delta      | Probility    | PepHits  |         |
|---------------------------------------------|--------|------------|------------|--------------|----------|---------|
| SEQUEST:(PepMatched Observed.Hits Coverage) |        |            | 2          | 1            | 10.43%   |         |
| GGAFEGTLHGPFHGYGEGAGEGIDDAEWVVAR            | +3     | 5.172      | 0.596      | 1.0000       | 1        |         |
| LADIDKDGMLDDDEFALANHLIK                     | +3     | 5.467      | 0.519      | 1.0000       | 7        |         |
| MASCOT:(PepMatched Observed.Hits Coverage)  |        |            | 2          | 1            | 10.43%   |         |
| Seq                                         | Charge | ObservedMS | ExpectedMS | CalculatedMS | PepScore | PepHits |
| LADIDKDGMLDDDEFALANHLIK                     | +3     | 858.0910   | 2571.2512  | 2571.2526    | 0        | 48      |
| GGAFEGTLHGPFHGYGEGAGEGIDDAEWVVAR            | +3     | 1105.8384  | 3314.4933  | 3314.5015    | 0        | 52      |

No. 223. Protein IPI00003817 Matched (SEQUEST MASCOT) Strategy.Hits PepMatched(SEQUEST MASCOT) SpectraMatched(SEQUEST MASCOT)  
 Y Y 1 3 3 22 24

\*Des: Rho GDP-dissociation inhibitor 2

| Seq                                         | Charge | Xcor       | Delta      | Probility    | PepHits  |         |
|---------------------------------------------|--------|------------|------------|--------------|----------|---------|
| SEQUEST:(PepMatched Observed.Hits Coverage) |        |            | 3          | 3            | 20.48%   |         |
| APEPHVEEDDDDELDSKLNYPKPPQK                  | +3     | 6.184      | 0.560      | 1.0000       | 19       |         |
| ELQEMDKDDESLIK                              | +2     | 4.590      | 0.539      | 0.9678       | 10       |         |
| APEPHVEEDDDDELDSK                           | +2     | 6.536      | 0.529      | 1.0000       | 15       |         |
| MASCOT:(PepMatched Observed.Hits Coverage)  |        |            | 3          | 9            | 20.48%   |         |
| Seq                                         | Charge | ObservedMS | ExpectedMS | CalculatedMS | PepScore | PepHits |
| ELQEMDKDDESLIK                              | +2     | 846.9040   | 1691.7934  | 1691.7923    | 0        | 68      |
| APEPHVEEDDDDELDSK                           | +2     | 970.4070   | 1938.7995  | 1938.7966    | 0        | 89      |
| APEPHVEEDDDDELDSKLNYPKPPQK                  | +3     | 1002.4736  | 3004.3991  | 3004.3937    | 0.01     | 43      |

No. 224. Protein IPI00328163 Matched (SEQUEST MASCOT) Strategy.Hits PepMatched(SEQUEST MASCOT) SpectraMatched(SEQUEST MASCOT)  
 N Y 1 0 5 0 90

\*Des: K-ALPHA-1 protein

| Seq                                         | Charge | ObservedMS | ExpectedMS | CalculatedMS | PepScore | PepHits |
|---------------------------------------------|--------|------------|------------|--------------|----------|---------|
| SEQUEST:(PepMatched Observed.Hits Coverage) |        |            | 5          | 1            | 21.4%    |         |
| MASCOT:(PepMatched Observed.Hits Coverage)  |        |            | 5          | 1            | 21.4%    |         |

Identified Human Platelet Proteins

|                       |    |           |           |           |      |    |    |
|-----------------------|----|-----------|-----------|-----------|------|----|----|
| AVFVDLEPTVIDEVRTGTYR  | +2 | 1140.5999 | 2279.1852 | 2279.1797 | 0.01 | 63 | 39 |
| IHFPLATYAPVISA EK     | +2 | 878.9868  | 1755.9590 | 1755.9559 | 0    | 73 | 25 |
| AVFVDLEPTVIDEVR       | +2 | 851.4586  | 1700.9026 | 1700.8984 | 0    | 91 | 47 |
| QLFHPEQLITGKEDAANNYAR | +3 | 805.7405  | 2414.1996 | 2414.1978 | 0    | 69 | 24 |
| LDHKFDL MYAKR         | +2 | 768.9041  | 1535.7936 | 1535.7918 | 0    | 59 | 33 |

|       |                                             |                          |               |                            |                                |           |                  |
|-------|---------------------------------------------|--------------------------|---------------|----------------------------|--------------------------------|-----------|------------------|
| No.   | Protein                                     | Matched (SEQUEST MASCOT) | Strategy.Hits | PepMatched(SEQUEST MASCOT) | SpectraMatched(SEQUEST MASCOT) |           |                  |
| 225.  | IPI00009123                                 | Y Y                      | 1             | 3 3                        | 6 6                            |           |                  |
| *Des: | Nucleobindin 2 precursor                    |                          |               |                            |                                |           |                  |
|       | SEQUEST:(PepMatched Observed.Hits Coverage) |                          |               | 3                          | 3                              | 8.43%     |                  |
|       | Seq                                         | Charge                   | Xcor          | Delta                      | Probability                    | PepHits   |                  |
|       | EVWEETDGLDPNDFDPK                           |                          | +2            | 4.029                      | 0.540                          | 0.9963    | 2                |
|       | DQLKEVWEETDGLDPNDFDPK                       |                          | +3            | 5.255                      | 0.489                          | 0.9960    | 4                |
|       | NEEDDMVEMEEER                               | +2                       | 3.940         | 0.662                      | 0.9988                         | 2         |                  |
|       | MASCOT:(PepMatched Observed.Hits Coverage)  |                          |               | 3                          | 3                              | 8.43%     |                  |
|       | Seq                                         | Charge                   | ObservedMS    | ExpectedMS                 | CalculatedMS                   |           | Pepscore PepHits |
|       | NEEDDMVEMEEER                               | +2                       | 827.8142      | 1653.6139                  | 1653.6134                      | 0 81      | 2                |
|       | EVWEETDGLDPNDFDPK                           | +2                       | 1003.4344     | 2004.8543                  | 2004.8588                      | 0 50      | 2                |
|       | DQLKEVWEETDGLDPNDFDPK                       |                          | +3            | 830.7153                   | 2489.1242                      | 2489.1234 | 0 42 2           |

|       |                                                  |                          |               |                            |                                |          |                  |
|-------|--------------------------------------------------|--------------------------|---------------|----------------------------|--------------------------------|----------|------------------|
| No.   | Protein                                          | Matched (SEQUEST MASCOT) | Strategy.Hits | PepMatched(SEQUEST MASCOT) | SpectraMatched(SEQUEST MASCOT) |          |                  |
| 226.  | IPI00383758                                      | N Y                      | 1             | 0 2                        | 0 2                            |          |                  |
| *Des: | Glyceraldehyde-3-phosphate dehydrogenase, muscle |                          |               |                            |                                |          |                  |
|       | SEQUEST:(PepMatched Observed.Hits Coverage)      |                          |               | 2                          | 1                              | 6.17%    |                  |
|       | MASCOT:(PepMatched Observed.Hits Coverage)       |                          |               | 2                          | 1                              | 6.17%    |                  |
|       | Seq                                              | Charge                   | ObservedMS    | ExpectedMS                 | CalculatedMS                   |          | Pepscore PepHits |
|       | VGVDGFR                                          | +2                       | 403.2192      | 804.4239                   | 805.4082                       | -0.97 55 | 1                |
|       | AGHLKGGAKR                                       | +2                       | 533.2988      | 1064.5830                  | 1064.6202                      | -0.03 52 | 2                |

|       |                                             |                          |               |                            |                                |         |                  |
|-------|---------------------------------------------|--------------------------|---------------|----------------------------|--------------------------------|---------|------------------|
| No.   | Protein                                     | Matched (SEQUEST MASCOT) | Strategy.Hits | PepMatched(SEQUEST MASCOT) | SpectraMatched(SEQUEST MASCOT) |         |                  |
| 227.  | IPI00291262                                 | Y Y                      | 1             | 2 2                        | 2 6                            |         |                  |
| *Des: | Clusterin precursor                         |                          |               |                            |                                |         |                  |
|       | SEQUEST:(PepMatched Observed.Hits Coverage) |                          |               | 2                          | 1                              | 6.34%   |                  |
|       | Seq                                         | Charge                   | Xcor          | Delta                      | Probability                    | PepHits |                  |
|       | ELDESLQVAER                                 | +2                       | 3.196         | 0.472                      | 0.9893                         | 2       |                  |
|       | EILSVCSTNNPSQAK                             | +2                       | 2.814         | 0.459                      | 0.9717                         | 3       |                  |
|       | MASCOT:(PepMatched Observed.Hits Coverage)  |                          |               | 2                          | 1                              | 6.34%   |                  |
|       | Seq                                         | Charge                   | ObservedMS    | ExpectedMS                 | CalculatedMS                   |         | Pepscore PepHits |
|       | ELDESLQVAER                                 | +2                       | 644.8214      | 1287.6283                  | 1287.6306                      | 0 66    | 4                |
|       | EILSVCSTNNPSQAK                             | +2                       | 853.4090      | 1704.8034                  | 1704.7988                      | 0 48    | 6                |

|       |                                             |                          |               |                            |                                |              |   |
|-------|---------------------------------------------|--------------------------|---------------|----------------------------|--------------------------------|--------------|---|
| No.   | Protein                                     | Matched (SEQUEST MASCOT) | Strategy.Hits | PepMatched(SEQUEST MASCOT) | SpectraMatched(SEQUEST MASCOT) |              |   |
| 228.  | IPI00062037                                 | Y Y                      | 1             | 2 2                        | 6 9                            |              |   |
| *Des: | Dynein light chain 2, cytoplasmic           |                          |               |                            |                                |              |   |
|       | SEQUEST:(PepMatched Observed.Hits Coverage) |                          |               | 2                          | 1                              | 30.76%       |   |
|       | Seq                                         | Charge                   | Xcor          | Delta                      | Probability                    | PepHits      |   |
|       | NADMSQDQDAVDCATQAMEK                        | +2                       |               |                            | 6.133                          | 0.694 1.0000 | 5 |

Identified Human Platelet Proteins

|                                            |                                             |                              |                 |                              |                                   |      |          |         |
|--------------------------------------------|---------------------------------------------|------------------------------|-----------------|------------------------------|-----------------------------------|------|----------|---------|
|                                            | NADMSQDAVDCATQAMEKYNIEK                     | +3                           | 3.646           | 0.369                        | 0.9510                            | 1    |          |         |
| MASCOT:(PepMatched Observed.Hits Coverage) | 2                                           | 1                            | 30.76%          |                              |                                   |      |          |         |
|                                            | Seq Charge ObservedMS                       | ExpectedMS                   | CalculatedMS    |                              |                                   |      | PepScore | PepHits |
|                                            | NADMSQDAVDCATQAMEK                          | +2                           | 1216.4730       | 2430.9315                    | 2429.9443                         | 0.99 | 137      | 9       |
|                                            | NADMSQDAVDCATQAMEKYNIEK                     | +3                           | 1026.7634       | 3077.2685                    | 3077.2722                         | 0    | 41       | 1       |
| No. 229.                                   | Protein IPI00604662                         | Matched (SEQUEST MASCOT) N Y | Strategy.Hits 1 | PepMatched(SEQUEST MASCOT) 0 | SpectraMatched(SEQUEST MASCOT) 16 | 0    | 19       |         |
| *Des:                                      | EH-domain containing 3                      |                              |                 |                              |                                   |      |          |         |
|                                            | SEQUEST:(PepMatched Observed.Hits Coverage) | 16                           | 1               | 39.7%                        |                                   |      |          |         |
|                                            | MASCOT:(PepMatched Observed.Hits Coverage)  | 16                           | 1               | 39.7%                        |                                   |      |          |         |
|                                            | Seq Charge ObservedMS                       | ExpectedMS                   | CalculatedMS    |                              |                                   |      | PepScore | PepHits |
|                                            | IVNTPEVIR                                   | +2                           | 520.8354        | 1039.6562                    | 1039.6026                         | 0.05 | 46       | 2       |
|                                            | LLPLEEHYR                                   | +2                           | 585.3502        | 1168.6858                    | 1168.6240                         | 0.06 | 46       | 3       |
|                                            | VYGALMWSLGK                                 | +2                           | 612.8592        | 1223.7038                    | 1223.6372                         | 0.07 | 59       | 1       |
|                                            | LNAFGNAFLNR                                 | +2                           | 618.8473        | 1235.6800                    | 1235.6410                         | 0.04 | 58       | 1       |
|                                            | YLLEQDFPGMR                                 | +2                           | 684.8539        | 1367.6932                    | 1367.6543                         | 0.04 | 58       | 1       |
|                                            | ELVNNLAEIYGR                                | +2                           | 695.8750        | 1389.7354                    | 1389.7252                         | 0.01 | 65       | 1       |
|                                            | LDISDEFSEVIK                                | +2                           | 697.8705        | 1393.7264                    | 1393.6976                         | 0.03 | 62       | 1       |
|                                            | LFEAEEQDLFR                                 | +2                           | 698.8463        | 1395.6780                    | 1395.6670                         | 0.01 | 65       | 1       |
|                                            | MQDQLQAQDFSK                                | +2                           | 719.8762        | 1437.7378                    | 1437.6558                         | 0.08 | 70       | 1       |
|                                            | KLFEAEEQDLFR                                | +2                           | 762.9403        | 1523.8660                    | 1523.7619                         | 0.1  | 54       | 1       |
|                                            | EHQISPGDFPNLKR                              | +3                           | 546.6509        | 1636.9309                    | 1636.8321                         | 0.1  | 42       | 1       |
|                                            | VYIGSFWSHPLLPDNR                            | +2                           | 1007.5909       | 2013.1672                    | 2013.0472                         | 0.12 | 48       | 3       |
|                                            | LEGHELPNELPAHLLPPSK                         | +4                           | 523.5645        | 2090.2289                    | 2090.1160                         | 0.11 | 39       | 1       |
|                                            | DKPMYDEIFYTLSPVDGK                          | +2                           | 1059.5508       | 2117.0870                    | 2117.0027                         | 0.08 | 57       | 2       |
|                                            | LADIDKDGMLDDDEFALANHLIK                     | +3                           | 858.1342        | 2571.3808                    | 2571.2526                         | 0.13 | 57       | 2       |
|                                            | ADQIETQQLMR                                 | +2                           | 666.8734        | 1331.7322                    | 1331.6503                         | 0.08 | 47       | 3       |
| No. 230.                                   | Protein IPI00010896                         | Matched (SEQUEST MASCOT) Y Y | Strategy.Hits 1 | PepMatched(SEQUEST MASCOT) 2 | SpectraMatched(SEQUEST MASCOT) 2  | 12   | 20       |         |
| *Des:                                      | Chloride intracellular channel protein 1    |                              |                 |                              |                                   |      |          |         |
|                                            | SEQUEST:(PepMatched Observed.Hits Coverage) | 2                            | 19              | 20.9%                        |                                   |      |          |         |
|                                            | Seq Charge Xcor Delta                       | Probability                  | PepHits         |                              |                                   |      |          |         |
|                                            | VLDNYLTSPLEEVDETSAEDEGVSQR                  | +3                           | 5.585           | 0.643                        | 1.0000                            | 2    |          |         |
|                                            | EEFASTCPDDEEIELAYEQVAK                      | +2                           | 4.237           | 0.662                        | 1.0000                            | 2    |          |         |
|                                            | MASCOT:(PepMatched Observed.Hits Coverage)  | 2                            | 17              | 20.9%                        |                                   |      |          |         |
|                                            | Seq Charge ObservedMS                       | ExpectedMS                   | CalculatedMS    |                              |                                   |      | PepScore | PepHits |
|                                            | EEFASTCPDDEEIELAYEQVAK                      | +2                           | 1258.5582       | 2515.1019                    | 2515.0948                         | 0.01 | 56       | 4       |
|                                            | VLDNYLTSPLEEVDETSAEDEGVSQR                  | +2                           | 1496.7014       | 2991.3883                    | 2991.3832                         | 0.01 | 44       | 6       |
| No. 231.                                   | Protein IPI00306311                         | Matched (SEQUEST MASCOT) Y Y | Strategy.Hits 2 | PepMatched(SEQUEST MASCOT) 3 | SpectraMatched(SEQUEST MASCOT) 4  | 27   | 20       |         |
| *Des:                                      | Pleckstrin                                  |                              |                 |                              |                                   |      |          |         |
|                                            | SEQUEST:(PepMatched Observed.Hits Coverage) | 3                            | 14              | 16.29%                       |                                   |      |          |         |
|                                            | Seq Charge Xcor Delta                       | Probability                  | PepHits         |                              |                                   |      |          |         |
|                                            | LPETIDLGALYLSMK                             | +2                           | 4.148           | 0.597                        | 0.9962                            | 2    |          |         |

Identified Human Platelet Proteins

| Seq                                                    | Charge | ObservedMS | ExpectedMS | CalculatedMS | Pepscore | PepHits |
|--------------------------------------------------------|--------|------------|------------|--------------|----------|---------|
| SEEENLFEIITADEVHYFLQAATPK                              | +3     | 4.149      | 0.421      | 0.9982       | 3        |         |
| PMWVVLLLEDGIEFYK                                       | +2     | 5.979      | 0.421      | 0.9876       | 5        |         |
| MASCOT:(PepMatched Observed.Hits Coverage) 4 13 18.82% |        |            |            |              |          |         |
| LPETIDLGALYLSMK                                        | +2     | 832.4525   | 1662.8904  | 1662.8902    | 0        | 2       |
| GSVFNTWKPMWVVLLLEDGIEFYK                               | +3     | 919.9750   | 2756.9033  | 2757.3875    | -0.47    | 57      |
| SEEENLFEIITADEVHYFLQAATPK                              | +2     | 1447.7104  | 2893.4063  | 2893.4021    | 0        | 116     |
| KSEENLFEIITADEVHYFLQAATPK                              | +3     | 1008.1744  | 3021.5015  | 3021.4970    | 0        | 112     |

| No.   | Protein                                               | Matched (SEQUEST MASCOT) | Strategy.Hits | PepMatched(SEQUEST MASCOT) | SpectraMatched(SEQUEST MASCOT) |         |
|-------|-------------------------------------------------------|--------------------------|---------------|----------------------------|--------------------------------|---------|
| 232.  | IPI00030929                                           | Y N                      | 1             | 4                          | 0 12 0                         |         |
| *Des: | Myosin regulatory light polypeptide 9, isoform b      |                          |               |                            |                                |         |
|       | SEQUEST:(PepMatched Observed.Hits Coverage) 4 2 42.5% |                          |               |                            |                                |         |
|       | Seq                                                   | Charge                   | Xcor          | Delta                      | Probility                      | PepHits |
|       | FTDEEVDEMYR                                           | +2                       | 3.315         | 0.622                      | 0.9948                         | 4       |
|       | GNFNYYEFTR                                            | +2                       | 2.833         | 0.463                      | 0.9735                         | 2       |
|       | ELLTTMGDRFTDEEVDEMYR                                  | +3                       | 4.735         | 0.527                      | 0.9967                         | 4       |
|       | ATSNVFMFDQSQIQEFK                                     | +2                       | 5.392         | 0.578                      | 0.9964                         | 10      |
|       | MASCOT:(PepMatched Observed.Hits Coverage)            |                          |               |                            |                                |         |

| No.   | Protein                                                    | Matched (SEQUEST MASCOT) | Strategy.Hits | PepMatched(SEQUEST MASCOT) | SpectraMatched(SEQUEST MASCOT) |          |         |
|-------|------------------------------------------------------------|--------------------------|---------------|----------------------------|--------------------------------|----------|---------|
| 233.  | IPI00021891                                                | Y Y                      | 2             | 4                          | 9 51 106                       |          |         |
| *Des: | Splice Isoform Gamma-B of Fibrinogen gamma chain precursor |                          |               |                            |                                |          |         |
|       | SEQUEST:(PepMatched Observed.Hits Coverage) 4 6 16.48%     |                          |               |                            |                                |          |         |
|       | Seq                                                        | Charge                   | Xcor          | Delta                      | Probility                      | PepHits  |         |
|       | YLQEIYNSNNQK                                               | +2                       | 3.941         | 0.450                      | 0.9939                         | 2        |         |
|       | YEASILTHDSSIR                                              | +3                       | 2.537         | 0.475                      | 0.9956                         | 5        |         |
|       | EGFGHLSPTGTTEFWLGNEK                                       | +3                       | 3.402         | 0.401                      | 0.9932                         | 2        |         |
|       | LTYAYFAGGDAGDAFDGDFGDDPSDK                                 | +3                       | 7.738         | 0.710                      | 1.0000                         | 47       |         |
|       | MASCOT:(PepMatched Observed.Hits Coverage) 9 8 28.41%      |                          |               |                            |                                |          |         |
|       | Seq                                                        | Charge                   | ObservedMS    | ExpectedMS                 | CalculatedMS                   | Pepscore | PepHits |
|       | VELEDWNGR                                                  | +2                       | 559.3063      | 1116.5980                  | 1116.5199                      | 0.08     | 44      |
|       | TSTADYAMFK                                                 | +2                       | 567.8010      | 1133.5874                  | 1133.5063                      | 0.08     | 50      |
|       | QSGLYFIKPLK                                                | +2                       | 647.4238      | 1292.8330                  | 1292.7492                      | 0.08     | 54      |
|       | YEASILTHDSSIR                                              | +2                       | 746.4073      | 1490.8000                  | 1490.7365                      | 0.06     | 76      |
|       | YLQEIYNSNNQK                                               | +2                       | 757.4080      | 1512.8014                  | 1512.7208                      | 0.08     | 53      |
|       | LTIGEGQQHHLGGAK                                            | +2                       | 773.4660      | 1544.9174                  | 1544.8059                      | 0.11     | 70      |
|       | IHLISTQSAIPYALR                                            | +2                       | 842.0019      | 1681.9892                  | 1681.9515                      | 0.04     | 58      |
|       | ASTPNGYDNGIHWATWK                                          | +2                       | 947.4903      | 1892.9660                  | 1892.9057                      | 0.06     | 68      |
|       | EGFGHLSPTGTTEFWLGNEK                                       | +3                       | 736.3983      | 2206.1731                  | 2206.0330                      | 0.14     | 79      |

| No.   | Protein                                                | Matched (SEQUEST MASCOT) | Strategy.Hits | PepMatched(SEQUEST MASCOT) | SpectraMatched(SEQUEST MASCOT) |         |
|-------|--------------------------------------------------------|--------------------------|---------------|----------------------------|--------------------------------|---------|
| 234.  | IPI00180404                                            | Y Y                      | 1             | 6                          | 8 17 31                        |         |
| *Des: | Hypothetical protein FLJ25225                          |                          |               |                            |                                |         |
|       | SEQUEST:(PepMatched Observed.Hits Coverage) 6 8 20.42% |                          |               |                            |                                |         |
|       | Seq                                                    | Charge                   | Xcor          | Delta                      | Probility                      | PepHits |
|       | QEMGEEEEENETFGLSR                                      | +2                       | 5.414         | 0.676                      | 1.0000                         | 8       |

Identified Human Platelet Proteins

| Seq                                        | Charge | ObservedMS | ExpectedMS | CalculatedMS | PepScore  | PepHits                        |
|--------------------------------------------|--------|------------|------------|--------------|-----------|--------------------------------|
| GSAASTCILTIESK                             | +2     | 2.910      | 0.498      | 0.9901       | 1         |                                |
| RAEQIEDINNTGTESASEEGDSSLITVVPVK            |        |            |            | +3           | 6.485     | 0.569 1.0000 4                 |
| QEFQLRQEMGEEEEENETFGLSR                    |        |            |            | +3           | 6.240     | 0.580 1.0000 3                 |
| EAENFHEEDDVDVDPAR                          |        |            |            | +3           | 2.678     | 0.354 0.9684 7                 |
| NMVDVDDSPPEMYK                             | +2     | 3.220      | 0.456      | 0.9908       | 3         |                                |
| MASCOT:(PepMatched Observed.Hits Coverage) |        |            |            |              | 8         | 7 24.9%                        |
| Seq                                        | Charge | ObservedMS | ExpectedMS | CalculatedMS |           | PepScore PepHits               |
| NMVDVDDSPPEMYK                             | +2     | 771.8256   | 1541.6366  | 1541.6378    | 0         | 63 4                           |
| QEMGEEEEENETFGLSR                          | +2     |            | 1007.4216  | 2012.8286    | 2012.8268 | 0 87 9                         |
| EEEEEEEGSIMNGSTAEDEEQTR                    | +2     |            | 1315.0195  | 2628.0245    | 2627.0300 | 0.99 41 2                      |
| REEEEEEEGSIMNGSTAEDEEQTR                   | +3     |            | 929.0475   | 2784.1206    | 2783.1311 | 0.99 60 4                      |
| KREEEEEEEGSIMNGSTAEDEEQTR                  | +3     |            | 971.7438   | 2912.2095    | 2911.2260 | 0.98 78 7                      |
| QEFQLRQEMGEEEEENETFGLSR                    | +3     |            | 982.1022   | 2943.2849    | 2943.2827 | 0 46 3                         |
| VTGEPKPEITWWFEIGEILDGEDIYQYIER             | +3     |            | 1176.5679  | 3526.6818    | 3526.6568 | 0.02 70 10                     |
| RAEQIEDINNTGTESASEEGDSSLITVVPVK            |        |            |            | +3           | 1143.9036 | 3428.6889 3428.6794 0.01 87 11 |

No. 235. Protein IPI00217236 Matched (SEQUEST MASCOT) Strategy.Hits PepMatched(SEQUEST MASCOT) SpectraMatched(SEQUEST MASCOT)  
 \*Des: Tubulin-specific chaperone A

| Seq                                         | Charge | ObservedMS | ExpectedMS | CalculatedMS | PepScore  | PepHits          |
|---------------------------------------------|--------|------------|------------|--------------|-----------|------------------|
| SEQUEST:(PepMatched Observed.Hits Coverage) |        |            |            |              | 2         | 2 17.43%         |
| MASCOT:(PepMatched Observed.Hits Coverage)  |        |            |            |              | 2         | 2 17.43%         |
| Seq                                         | Charge | ObservedMS | ExpectedMS | CalculatedMS |           | PepScore PepHits |
| ILENEKDLLEEAEYK                             | +2     | 926.4454   | 1850.8762  | 1850.8785    | 0         | 51 4             |
| ILENEKDLLEEAEYKEAR                          | +3     |            | 736.6930   | 2207.0572    | 2207.0593 | 0 53 3           |

No. 236. Protein IPI00221111 Matched (SEQUEST MASCOT) Strategy.Hits PepMatched(SEQUEST MASCOT) SpectraMatched(SEQUEST MASCOT)  
 \*Des: Splice Isoform 2 of Protein kinase C and casein kinase substrate in neurons protein 2

| Seq                                         | Charge | ObservedMS | ExpectedMS | CalculatedMS | PepScore | PepHits          |
|---------------------------------------------|--------|------------|------------|--------------|----------|------------------|
| SEQUEST:(PepMatched Observed.Hits Coverage) |        |            |            |              | 2        | 1 5.29%          |
| MASCOT:(PepMatched Observed.Hits Coverage)  |        |            |            |              | 2        | 1 5.29%          |
| Seq                                         | Charge | ObservedMS | ExpectedMS | CalculatedMS |          | PepScore PepHits |
| HLDLNSVAGYK                                 | +2     | 608.8591   | 1215.7036  | 1215.6247    | 0.08     | 70 2             |
| AYAQLTEWAR                                  | +2     | 668.8804   | 1335.7462  | 1335.6571    | 0.09     | 78 2             |

No. 237. Protein IPI00289499 Matched (SEQUEST MASCOT) Strategy.Hits PepMatched(SEQUEST MASCOT) SpectraMatched(SEQUEST MASCOT)  
 \*Des: Bifunctional purine biosynthesis protein PURH

| Seq                                         | Charge | ObservedMS | ExpectedMS | CalculatedMS | PepScore | PepHits          |
|---------------------------------------------|--------|------------|------------|--------------|----------|------------------|
| SEQUEST:(PepMatched Observed.Hits Coverage) |        |            |            |              | 2        | 1 5.81%          |
| MASCOT:(PepMatched Observed.Hits Coverage)  |        |            |            |              | 2        | 1 5.81%          |
| Seq                                         | Charge | ObservedMS | ExpectedMS | CalculatedMS |          | PepScore PepHits |
| DVSELTGFPEMLGGR                             | +2     | 804.4451   | 1606.8756  | 1606.7660    | 0.11     | 58 1             |
| YGMNPHQTPAQLYTLQPK                          | +3     | 696.3940   | 2086.1602  | 2086.0306    | 0.13     | 44 1             |

No. 238. Protein IPI00166768 Matched (SEQUEST MASCOT) Strategy.Hits PepMatched(SEQUEST MASCOT) SpectraMatched(SEQUEST MASCOT)  
 \*Des: TUBA6 protein

| Seq                                         | Charge | ObservedMS | ExpectedMS | CalculatedMS | PepScore | PepHits  |
|---------------------------------------------|--------|------------|------------|--------------|----------|----------|
| SEQUEST:(PepMatched Observed.Hits Coverage) |        |            |            |              | 2        | 1 11.17% |



Identified Human Platelet Proteins

| No.   | Protein                                                                      | Matched (SEQUEST MASCOT) | Strategy.Hits | PepMatched(SEQUEST MASCOT) | SpectraMatched(SEQUEST MASCOT) |           |       |          |         |
|-------|------------------------------------------------------------------------------|--------------------------|---------------|----------------------------|--------------------------------|-----------|-------|----------|---------|
| 239.  | IPI00180267                                                                  | Y                        | Y             | 1                          | 2                              | 2         | 3     | 2        |         |
| *Des: | INM01                                                                        |                          |               |                            |                                |           |       |          |         |
|       | SEQUEST:(PepMatched Observed.Hits Coverage)                                  |                          |               | 2                          | 1                              | 16.73%    |       |          |         |
|       | Seq                                                                          | Charge                   | Xcor          | Delta                      | Probility                      | PepHits   |       |          |         |
|       | TIGGGDDSFNTFFSETGAGK                                                         | +2                       |               | 4.405                      | 0.368                          | 0.9610    | 3     |          |         |
|       | AVFVDLEPTVIDEVR                                                              | +2                       |               | 3.982                      | 0.518                          | 0.9921    | 2     |          |         |
|       | MASCOT:(PepMatched Observed.Hits Coverage)                                   |                          |               | 2                          | 1                              | 16.73%    |       |          |         |
|       | Seq                                                                          | Charge                   | ObservedMS    | ExpectedMS                 | CalculatedMS                   |           |       | Pepscore | PepHits |
|       | VLLDEPPEEEDGLR                                                               | +2                       | 805.8994      | 1609.7842                  | 1609.7835                      | 0         | 43    | 1        |         |
|       | LALEDISADPEDTVGGHPSWSGWEDDAK                                                 | +3                       |               | 999.7839                   | 2996.3300                      | 2996.3311 | 0     | 50       | 2       |
| No.   | Protein                                                                      | Matched (SEQUEST MASCOT) | Strategy.Hits | PepMatched(SEQUEST MASCOT) | SpectraMatched(SEQUEST MASCOT) |           |       |          |         |
| 240.  | IPI00296353                                                                  | Y                        | Y             | 1                          | 2                              | 2         | 2     | 3        |         |
| *Des: | Hypothetical protein DKFZp762l167                                            |                          |               |                            |                                |           |       |          |         |
|       | SEQUEST:(PepMatched Observed.Hits Coverage)                                  |                          |               | 2                          | 1                              | 7.85%     |       |          |         |
|       | Seq                                                                          | Charge                   | Xcor          | Delta                      | Probility                      | PepHits   |       |          |         |
|       | SSENSQEDQEVVVVKEPDEGELEEEWLK                                                 | +3                       |               | 4.750                      | 0.470                          | 0.9514    | 2     |          |         |
|       | SISQDSLDELSMEDYWIELENIK                                                      | +2                       |               | 3.773                      | 0.613                          | 0.9859    | 1     |          |         |
|       | MASCOT:(PepMatched Observed.Hits Coverage)                                   |                          |               | 2                          | 1                              | 7.85%     |       |          |         |
|       | Seq                                                                          | Charge                   | ObservedMS    | ExpectedMS                 | CalculatedMS                   |           |       | Pepscore | PepHits |
|       | SISQDSLDELSMEDYWIELENIK                                                      | +2                       |               | 1379.1388                  | 2756.2630                      | 2756.2738 | 0     | 56       | 1       |
|       | SSENSQEDQEVVVVKEPDEGELEEEWLK                                                 | +3                       |               | 1087.5055                  | 3259.4947                      | 3259.4891 | 0.01  | 62       | 2       |
| No.   | Protein                                                                      | Matched (SEQUEST MASCOT) | Strategy.Hits | PepMatched(SEQUEST MASCOT) | SpectraMatched(SEQUEST MASCOT) |           |       |          |         |
| 241.  | IPI00220249                                                                  | Y                        | Y             | 1                          | 2                              | 2         | 7     | 6        |         |
| *Des: | Latent transforming growth factor beta binding protein, isoform 1L precursor |                          |               |                            |                                |           |       |          |         |
|       | SEQUEST:(PepMatched Observed.Hits Coverage)                                  |                          |               | 2                          | 1                              | 2.89%     |       |          |         |
|       | Seq                                                                          | Charge                   | Xcor          | Delta                      | Probility                      | PepHits   |       |          |         |
|       | DALVDFSEQYTPEADPYFIQDR                                                       | +2                       |               | 4.935                      | 0.547                          | 1.0000    | 5     |          |         |
|       | FLNSFEELQAECCGILNGCENGR                                                      | +3                       |               | 3.461                      | 0.361                          | 0.9799    | 3     |          |         |
|       | MASCOT:(PepMatched Observed.Hits Coverage)                                   |                          |               | 2                          | 1                              | 3.51%     |       |          |         |
|       | Seq                                                                          | Charge                   | ObservedMS    | ExpectedMS                 | CalculatedMS                   |           |       | Pepscore | PepHits |
|       | FLNSFEELQAECCGILNGCENGR                                                      | +2                       |               | 1286.5488                  | 2571.0831                      | 2571.1369 | -0.04 | 42       | 3       |
|       | GFVPAGESSEAGGENYKDADECLLFQGEICK                                              | +3                       |               | 1116.8326                  | 3347.4761                      | 3349.4753 | -1.99 | 42       | 3       |
| No.   | Protein                                                                      | Matched (SEQUEST MASCOT) | Strategy.Hits | PepMatched(SEQUEST MASCOT) | SpectraMatched(SEQUEST MASCOT) |           |       |          |         |
| 242.  | IPI00291412                                                                  | N                        | Y             | 1                          | 0                              | 2         | 0     | 3        |         |
| *Des: | Ca(2+)/calmodulin-dependent protein kinase phosphatase                       |                          |               |                            |                                |           |       |          |         |
|       | SEQUEST:(PepMatched Observed.Hits Coverage)                                  |                          |               | 2                          | 1                              | 11.9%     |       |          |         |
|       | MASCOT:(PepMatched Observed.Hits Coverage)                                   |                          |               | 2                          | 1                              | 11.9%     |       |          |         |
|       | Seq                                                                          | Charge                   | ObservedMS    | ExpectedMS                 | CalculatedMS                   |           |       | Pepscore | PepHits |

Identified Human Platelet Proteins

|                                  |    |           |           |           |      |    |   |  |
|----------------------------------|----|-----------|-----------|-----------|------|----|---|--|
| DPQELLEGGNQEGDPQAEGR             | +2 | 1098.4966 | 2194.9786 | 2194.9726 | 0.01 | 72 | 3 |  |
| EEEEEEEDDDEEEKAPVTL LDAQSLAQSFNR | +3 | 1247.8917 | 3740.6533 | 3740.6336 | 0.02 | 71 | 1 |  |

|      |             |                          |               |                            |                                |
|------|-------------|--------------------------|---------------|----------------------------|--------------------------------|
| No.  | Protein     | Matched (SEQUEST MASCOT) | Strategy.Hits | PepMatched(SEQUEST MASCOT) | SpectraMatched(SEQUEST MASCOT) |
| 243. | IPI00216005 | N Y                      | 2 0           | 3 0                        | 7                              |

\*Des: Tubulin alpha-8 chain

SEQUEST:(PepMatched Observed.Hits Coverage)

|                                            |        |            |            |                |                  |
|--------------------------------------------|--------|------------|------------|----------------|------------------|
| MASCOT:(PepMatched Observed.Hits Coverage) | 3      | 5          | 11.37%     |                |                  |
| Seq                                        | Charge | ObservedMS | ExpectedMS | CalculatedMS   | Pepscore PepHits |
| AVMIDLEPTVVDEVR                            | +2     | 843.4888   | 1684.9630  | 1684.8705 0.09 | 77 1             |
| IHFPLVYAPIISAEK                            | +3     | 600.3796   | 1798.1170  | 1798.0029 0.11 | 50 1             |
| INDDDSFTTFFSETGNGK                         | +2     | 997.9949   | 1993.9752  | 1993.8541 0.12 | 83 1             |

|      |             |                          |               |                            |                                |
|------|-------------|--------------------------|---------------|----------------------------|--------------------------------|
| No.  | Protein     | Matched (SEQUEST MASCOT) | Strategy.Hits | PepMatched(SEQUEST MASCOT) | SpectraMatched(SEQUEST MASCOT) |
| 244. | IPI00025318 | Y Y                      | 1 2           | 2 4                        | 8                              |

\*Des: SH3 domain-binding glutamic acid-rich-like protein

SEQUEST:(PepMatched Observed.Hits Coverage)

|                                            |        |            |            |              |                  |
|--------------------------------------------|--------|------------|------------|--------------|------------------|
| MASCOT:(PepMatched Observed.Hits Coverage) | 2      | 1          | 21.55%     |              |                  |
| Seq                                        | Charge | Xcor       | Delta      | Probability  | PepHits          |
| GDYDAFFEAR                                 | +2     | 2.871      | 0.481      | 0.9922       | 2                |
| VYIASSSGSTAIK                              | +2     | 2.768      | 0.600      | 0.9955       | 2                |
| MASCOT:(PepMatched Observed.Hits Coverage) | 2      | 2          | 21.55%     |              |                  |
| Seq                                        | Charge | ObservedMS | ExpectedMS | CalculatedMS | Pepscore PepHits |
| GDYDAFFEAR                                 | +2     | 595.7588   | 1189.5030  | 1189.5040 0  | 75 4             |
| VYIASSSGSTAIK                              | +2     | 642.3442   | 1282.6738  | 1282.6768 0  | 52 4             |

|      |             |                          |               |                            |                                |
|------|-------------|--------------------------|---------------|----------------------------|--------------------------------|
| No.  | Protein     | Matched (SEQUEST MASCOT) | Strategy.Hits | PepMatched(SEQUEST MASCOT) | SpectraMatched(SEQUEST MASCOT) |
| 245. | IPI00382894 | N Y                      | 1 0           | 8 0                        | 115                            |

\*Des: Tropomyosin 3

SEQUEST:(PepMatched Observed.Hits Coverage)

|                                            |        |            |            |                 |                  |
|--------------------------------------------|--------|------------|------------|-----------------|------------------|
| MASCOT:(PepMatched Observed.Hits Coverage) | 8      | 1          | 31.62%     |                 |                  |
| Seq                                        | Charge | ObservedMS | ExpectedMS | CalculatedMS    | Pepscore PepHits |
| MELQEIQLK                                  | +2     | 566.3084   | 1130.6023  | 1130.6005 0     | 54 5             |
| KLVIIEGDLER                                | +2     | 642.8791   | 1283.7436  | 1283.7448 0     | 41 9             |
| EQAEAEVASLNR                               | +2     | 658.8253   | 1315.6360  | 1315.6367 0     | 45 1             |
| TIDDLEDELYAQK                              | +2     | 776.8767   | 1551.7389  | 1551.7304 0.01  | 81 3             |
| DEEKMELQEIQLK                              | +2     | 816.9118   | 1631.8091  | 1631.8076 0     | 67 5             |
| KIQVLQQQADDAEER                            | +2     | 885.9521   | 1769.8896  | 1769.8907 0     | 59 21            |
| IQLVEEELDR                                 | +2     | 621.6552   | 1241.2958  | 1242.6455 -1.34 | 88 106           |
| IQVLQQQADDAEER                             | +2     | 821.9055   | 1641.7965  | 1641.7958 0     | 84 43            |

|      |             |                          |               |                            |                                |
|------|-------------|--------------------------|---------------|----------------------------|--------------------------------|
| No.  | Protein     | Matched (SEQUEST MASCOT) | Strategy.Hits | PepMatched(SEQUEST MASCOT) | SpectraMatched(SEQUEST MASCOT) |
| 246. | IPI00216008 | N Y                      | 1 0           | 6 0                        | 6                              |

\*Des: Splice Isoform Long of Glucose-6-phosphate 1-dehydrogenase

SEQUEST:(PepMatched Observed.Hits Coverage)

|                                            |        |            |            |                |                  |
|--------------------------------------------|--------|------------|------------|----------------|------------------|
| MASCOT:(PepMatched Observed.Hits Coverage) | 6      | 1          | 14.18%     |                |                  |
| Seq                                        | Charge | ObservedMS | ExpectedMS | CalculatedMS   | Pepscore PepHits |
| IFGPIWNR                                   | +2     | 501.8133   | 1001.6120  | 1001.5446 0.07 | 40 1             |

Identified Human Platelet Proteins

|                  |    |          |           |           |      |    |   |
|------------------|----|----------|-----------|-----------|------|----|---|
| VGFAQYEGTYK      | +2 | 596.3255 | 1190.6364 | 1190.5607 | 0.08 | 35 | 1 |
| EMVQNLMLVLR      | +2 | 616.8704 | 1231.7262 | 1231.6416 | 0.08 | 57 | 1 |
| DGLLPENTFIVGYAR  | +2 | 832.9905 | 1663.9664 | 1663.8569 | 0.11 | 45 | 1 |
| LNSHMNALHLGSQANR | +3 | 588.3363 | 1761.9871 | 1761.8692 | 0.12 | 37 | 1 |
| NSYVAGQYDDAASYQR | +2 | 904.4652 | 1806.9158 | 1806.7809 | 0.13 | 90 | 1 |

No. 247. Protein IPI00020599 Matched (SEQUEST MASCOT) Y Y Strategy.Hits 2 4 5 15 17 PepMatched(SEQUEST MASCOT) SpectraMatched(SEQUEST MASCOT)

\*Des: Calreticulin precursor

|                                             |                   |            |              |           |          |         |    |
|---------------------------------------------|-------------------|------------|--------------|-----------|----------|---------|----|
| SEQUEST:(PepMatched Observed.Hits Coverage) |                   | 4          | 17           | 18.39%    |          |         |    |
| Seq                                         | Charge Xcor Delta | Probility  | PepHits      |           |          |         |    |
| IDNSQVESGSLEDDWDFLPPK                       | +3                | 3.440      | 0.428        | 0.9928    | 3        |         |    |
| KPEDWDEEMDGEWEPPIQNPEYK                     | +3                | 4.728      | 0.475        | 0.9973    | 4        |         |    |
| IDNSQVESGSLEDDWDFLPPK                       | +2                | 4.944      | 0.571        | 0.9968    | 5        |         |    |
| SGTIFDNFLITNDEAYAEFFGNETWGVTK               | +3                | 4.653      | 0.492        | 0.9975    | 2        |         |    |
| MASCOT:(PepMatched Observed.Hits Coverage)  |                   | 5          | 15           | 27.12%    |          |         |    |
| Seq                                         | Charge ObservedMS | ExpectedMS | CalculatedMS |           | Pepscore | PepHits |    |
| IDNSQVESGSLEDDWDFLPPK                       | +2                | 1196.0542  | 2390.0938    | 2390.0914 | 0        | 86      | 2  |
| IDNSQVESGSLEDDWDFLPPK                       | +3                | 840.4033   | 2518.1881    | 2518.1863 | 0        | 47      | 2  |
| KPEDWDEEMDGEWEPPIQNPEYK                     | +3                | 987.4380   | 2959.2921    | 2959.2858 | 0.01     | 61      | 10 |
| GTWIHPEIDNPEYSPDPSIYAYDNFGLGLDLWQVK         | +3                | 1383.6766  | 4148.0081    | 4147.9843 | 0.02     | 67      | 1  |
| SGTIFDNFLITNDEAYAEFFGNETWGVTK               | +3                | 1090.1709  | 3267.4909    | 3267.4883 | 0        | 83      | 5  |

No. 248. Protein IPI00410714 Matched (SEQUEST MASCOT) Y Y Strategy.Hits 2 3 5 29 37 PepMatched(SEQUEST MASCOT) SpectraMatched(SEQUEST MASCOT)

\*Des: Alpha 2 globin variant

|                                             |                   |            |              |           |          |         |    |
|---------------------------------------------|-------------------|------------|--------------|-----------|----------|---------|----|
| SEQUEST:(PepMatched Observed.Hits Coverage) |                   | 3          | 1            | 31.72%    |          |         |    |
| Seq                                         | Charge Xcor Delta | Probility  | PepHits      |           |          |         |    |
| VGAHAGEYGAEALER                             | +2                | 4.560      | 0.667        | 1.0000    | 20       |         |    |
| AAWGKVGGAHAGEYGAEALER                       | +2                | 5.704      | 0.683        | 1.0000    | 17       |         |    |
| VGAHAGEYGAEALERMFLSFPTTK                    | +4                | 4.706      | 0.728        | 1.0000    | 2        |         |    |
| MASCOT:(PepMatched Observed.Hits Coverage)  |                   | 5          | 2            | 42.06%    |          |         |    |
| Seq                                         | Charge ObservedMS | ExpectedMS | CalculatedMS |           | Pepscore | PepHits |    |
| VGAHAGEYGAEALER                             | +2                | 765.3709   | 1528.7273    | 1528.7269 | 0        | 90      | 17 |
| AAWGKVGGAHAGEYGAEALER                       | +2                | 1022.0074  | 2042.0002    | 2041.9969 | 0        | 86      | 16 |
| MFLSFPTTK                                   | +2                | 536.2805   | 1070.5464    | 1070.5470 | 0        | 43      | 4  |
| FLASVSTVLTSK                                | +2                | 626.8616   | 1251.7087    | 1251.7074 | 0        | 67      | 8  |
| TYFPHFDLSHGSAQVK                            | +2                | 917.4511   | 1832.8877    | 1832.8845 | 0        | 62      | 7  |

No. 249. Protein IPI00008339 Matched (SEQUEST MASCOT) Y Y Strategy.Hits 1 2 2 4 4 PepMatched(SEQUEST MASCOT) SpectraMatched(SEQUEST MASCOT)

\*Des: C14orf173 protein

|                                             |                   |           |         |        |   |  |  |
|---------------------------------------------|-------------------|-----------|---------|--------|---|--|--|
| SEQUEST:(PepMatched Observed.Hits Coverage) |                   | 2         | 2       | 11.79% |   |  |  |
| Seq                                         | Charge Xcor Delta | Probility | PepHits |        |   |  |  |
| GARPPAAGPGGDEDEDEEDTAPESALDTS               | +3                | 4.882     | 0.343   | 0.9915 | 2 |  |  |
| DPTSLGVLQAEADSTSEGLEDAVHSR                  | +3                | 4.127     | 0.425   | 0.9950 | 2 |  |  |
| MASCOT:(PepMatched Observed.Hits Coverage)  |                   | 2         | 2       | 11.79% |   |  |  |

Identified Human Platelet Proteins

| Seq                              | Charge | ObservedMS | ExpectedMS | CalculatedMS | Pepscore | PepHits |
|----------------------------------|--------|------------|------------|--------------|----------|---------|
| DPTSLGVLQAEADSTSEGLEDAVHSR       | +3     | 933.1270   | 2796.3592  | 2796.3413    | 0.02     | 69      |
| GARPPAAGPGGDEDEDEEDTAPESALDTSLDK | +3     | 1071.4722  | 3211.3947  | 3211.3912    | 0        | 68      |

| No.   | Protein                                     | Matched (SEQUEST MASCOT) | Strategy.Hits | PepMatched(SEQUEST MASCOT) | SpectraMatched(SEQUEST MASCOT) |          |         |
|-------|---------------------------------------------|--------------------------|---------------|----------------------------|--------------------------------|----------|---------|
| 250.  | IPI00022774                                 | Y                        | Y             | 1                          | 2                              |          |         |
| *Des: | Transitional endoplasmic reticulum ATPase   |                          |               |                            |                                |          |         |
|       | SEQUEST:(PepMatched Observed.Hits Coverage) | 2                        | 3             | 5.98%                      |                                |          |         |
|       | Seq                                         | Charge                   | Xcor          | Delta                      | Proability                     | PepHits  |         |
|       | QTNPSAMEVEEDDPVPEIR                         | +2                       | 4.389         | 0.379                      | 0.9924                         | 2        |         |
|       | KMDLIDLEDETIDAEVMNSLAVTMDDFR                | +3                       | 4.971         | 0.489                      | 0.9984                         | 2        |         |
|       | MASCOT:(PepMatched Observed.Hits Coverage)  | 3                        | 2             | 5.98%                      |                                |          |         |
|       | Seq                                         | Charge                   | ObservedMS    | ExpectedMS                 | CalculatedMS                   | Pepscore | PepHits |
|       | QTNPSAMEVEEDDPVPEIR                         | +2                       | 1078.4954     | 2154.9762                  | 2154.9739                      | 0        | 46      |
|       | MDLIDLEDETIDAEVMNSLAVTMDDFR                 | +3                       | 1034.4716     | 3100.3928                  | 3100.3926                      | 0        | 41      |
|       | KMDLIDLEDETIDAEVMNSLAVTMDDFR                | +3                       | 1077.1708     | 3228.4905                  | 3228.4876                      | 0        | 58      |

| No.   | Protein                                     | Matched (SEQUEST MASCOT) | Strategy.Hits | PepMatched(SEQUEST MASCOT) | SpectraMatched(SEQUEST MASCOT) |          |         |
|-------|---------------------------------------------|--------------------------|---------------|----------------------------|--------------------------------|----------|---------|
| 251.  | IPI00382605                                 | N                        | Y             | 1                          | 0                              |          |         |
| *Des: | CLINT                                       |                          |               |                            |                                |          |         |
|       | SEQUEST:(PepMatched Observed.Hits Coverage) | 3                        | 10            | 15.09%                     |                                |          |         |
|       | MASCOT:(PepMatched Observed.Hits Coverage)  | 3                        | 10            | 15.09%                     |                                |          |         |
|       | Seq                                         | Charge                   | ObservedMS    | ExpectedMS                 | CalculatedMS                   | Pepscore | PepHits |
|       | VLLDWINDVLVEER                              | +2                       | 856.9672      | 1711.9198                  | 1711.9144                      | 0.01     | 75      |
|       | NLVAILHLLVSLAMHFR                           | +3                       | 649.7188      | 1946.1346                  | 1946.1287                      | 0.01     | 49      |
|       | NAINSPMSPALADVHPEDTQLEENER                  | +3                       | 1002.7983     | 3005.3730                  | 3005.3672                      | 0.01     | 67      |

| No.   | Protein                                     | Matched (SEQUEST MASCOT) | Strategy.Hits | PepMatched(SEQUEST MASCOT) | SpectraMatched(SEQUEST MASCOT) |         |
|-------|---------------------------------------------|--------------------------|---------------|----------------------------|--------------------------------|---------|
| 252.  | IPI00291922                                 | Y                        | N             | 1                          | 2                              |         |
| *Des: | Proteasome subunit alpha type 5             |                          |               |                            |                                |         |
|       | SEQUEST:(PepMatched Observed.Hits Coverage) | 2                        | 1             | 11.38%                     |                                |         |
|       | Seq                                         | Charge                   | Xcor          | Delta                      | Proability                     | PepHits |
|       | LFQVEYAIEAIK                                | +2                       | 3.547         | 0.439                      | 0.9889                         | 2       |
|       | PFGVALLFGGVDEK                              | +2                       | 4.428         | 0.525                      | 0.9917                         | 2       |
|       | MASCOT:(PepMatched Observed.Hits Coverage)  | 2                        | 1             | 28.85%                     |                                |         |

| No.   | Protein                                                    | Matched (SEQUEST MASCOT) | Strategy.Hits | PepMatched(SEQUEST MASCOT) | SpectraMatched(SEQUEST MASCOT) |          |         |
|-------|------------------------------------------------------------|--------------------------|---------------|----------------------------|--------------------------------|----------|---------|
| 253.  | IPI00328680                                                | N                        | Y             | 1                          | 0                              |          |         |
| *Des: | Multiple coagulation factor deficiency protein 2 precursor |                          |               |                            |                                |          |         |
|       | SEQUEST:(PepMatched Observed.Hits Coverage)                | 2                        | 1             | 28.85%                     |                                |          |         |
|       | MASCOT:(PepMatched Observed.Hits Coverage)                 | 2                        | 1             | 28.85%                     |                                |          |         |
|       | Seq                                                        | Charge                   | ObservedMS    | ExpectedMS                 | CalculatedMS                   | Pepscore | PepHits |
|       | DDDKNNDGYIDYAEFAK                                          | +2                       | 996.9277      | 1991.8408                  | 1991.8384                      | 0        | 51      |
|       | EEGSEQAPLMSEDELINIIDGVLRL                                  | +3                       | 886.4411      | 2656.3015                  | 2656.2901                      | 0.01     | 48      |

| No.  | Protein     | Matched (SEQUEST MASCOT) | Strategy.Hits | PepMatched(SEQUEST MASCOT) | SpectraMatched(SEQUEST MASCOT) |
|------|-------------|--------------------------|---------------|----------------------------|--------------------------------|
| 254. | IPI00550792 | Y                        | Y             | 1                          | 4                              |

Identified Human Platelet Proteins

|       |                                             |                          |               |                            |                                |           |      |    |   |  |
|-------|---------------------------------------------|--------------------------|---------------|----------------------------|--------------------------------|-----------|------|----|---|--|
| *Des: | Breast cancer associated protein BRAP1      |                          |               |                            |                                |           |      |    |   |  |
|       | SEQUEST:(PepMatched Observed.Hits Coverage) | 4                        | 19            | 13.73%                     |                                |           |      |    |   |  |
|       | Seq Charge Xcor Delta                       | Probility                | PepHits       |                            |                                |           |      |    |   |  |
|       | SESESVSATEDLAPDAAQGEDNSEIK                  | +2                       | 3.805         | 0.547                      | 0.9935                         | 2         |      |    |   |  |
|       | VSETLQEIYSSEWDGHEELK                        | +2                       | 3.247         | 0.408                      | 0.9619                         | 1         |      |    |   |  |
|       | TMEIYVAQFSEIK                               | +2                       | 3.134         | 0.430                      | 0.9719                         | 1         |      |    |   |  |
|       | AIVWNNDLLWEDYEEK                            | +2                       | 4.324         | 0.466                      | 0.9919                         | 2         |      |    |   |  |
|       | MASCOT:(PepMatched Observed.Hits Coverage)  | 4                        | 16            | 13.73%                     |                                |           |      |    |   |  |
|       | Seq Charge ObservedMS                       | ExpectedMS               | CalculatedMS  | Pepscore                   | PepHits                        |           |      |    |   |  |
|       | TMEIYVAQFSEIK                               | +2                       | 779.8970      | 1557.7794                  | 1557.7748                      | 0         | 60   | 2  |   |  |
|       | AIVWNNDLLWEDYEEK                            | +2                       |               | 1018.9828                  | 2035.9511                      | 2035.9527 | 0    | 83 | 8 |  |
|       | VSETLQEIYSSEWDGHEELK                        | +2                       |               | 1190.0557                  | 2378.0968                      | 2378.0913 | 0.01 | 47 | 4 |  |
|       | SESESVSATEDLAPDAAQGEDNSEIK                  | +2                       |               | 1340.0945                  | 2678.1744                      | 2678.1678 | 0.01 | 72 | 6 |  |
| No.   | Protein                                     | Matched (SEQUEST MASCOT) | Strategy.Hits | PepMatched(SEQUEST MASCOT) | SpectraMatched(SEQUEST MASCOT) |           |      |    |   |  |
| 255.  | IPI00012079                                 | Y                        | N             | 1                          | 2                              | 0         | 5    | 0  |   |  |
| *Des: | Eukaryotic translation initiation factor 4B |                          |               |                            |                                |           |      |    |   |  |
|       | SEQUEST:(PepMatched Observed.Hits Coverage) | 2                        | 2             | 7.71%                      |                                |           |      |    |   |  |
|       | Seq Charge Xcor Delta                       | Probility                | PepHits       |                            |                                |           |      |    |   |  |
|       | YAALSVDGEDENEGEDYA                          | +2                       | 3.181         | 0.549                      | 0.9894                         | 3         |      |    |   |  |
|       | PVSWADETDDLEGDVSTTWHSNDDVVYR                | +3                       |               | 5.254                      | 0.497                          | 0.9983    | 2    |    |   |  |
|       | MASCOT:(PepMatched Observed.Hits Coverage)  |                          |               |                            |                                |           |      |    |   |  |
| No.   | Protein                                     | Matched (SEQUEST MASCOT) | Strategy.Hits | PepMatched(SEQUEST MASCOT) | SpectraMatched(SEQUEST MASCOT) |           |      |    |   |  |
| 256.  | IPI00018398                                 | Y                        | Y             | 1                          | 2                              | 2         | 5    | 4  |   |  |
| *Des: | 26S protease regulatory subunit 6A          |                          |               |                            |                                |           |      |    |   |  |
|       | SEQUEST:(PepMatched Observed.Hits Coverage) | 2                        | 1             | 8.5%                       |                                |           |      |    |   |  |
|       | Seq Charge Xcor Delta                       | Probility                | PepHits       |                            |                                |           |      |    |   |  |
|       | AMEVDERPTEQYSDIGGLDK                        | +3                       | 3.788         | 0.489                      | 0.9970                         | 4         |      |    |   |  |
|       | DSYLILETLPTHEYDSR                           | +2                       | 4.365         | 0.455                      | 0.9937                         | 3         |      |    |   |  |
|       | MASCOT:(PepMatched Observed.Hits Coverage)  | 2                        | 1             | 8.5%                       |                                |           |      |    |   |  |
|       | Seq Charge ObservedMS                       | ExpectedMS               | CalculatedMS  | Pepscore                   | PepHits                        |           |      |    |   |  |
|       | DSYLILETLPTHEYDSR                           | +2                       |               | 957.9693                   | 1913.9240                      | 1913.9258 | 0    | 55 | 3 |  |
|       | AMEVDERPTEQYSDIGGLDK                        | +3                       |               | 751.6819                   | 2252.0240                      | 2252.0266 | 0    | 48 | 4 |  |
| No.   | Protein                                     | Matched (SEQUEST MASCOT) | Strategy.Hits | PepMatched(SEQUEST MASCOT) | SpectraMatched(SEQUEST MASCOT) |           |      |    |   |  |
| 257.  | IPI00302047                                 | N                        | Y             | 1                          | 0                              | 2         | 0    | 14 |   |  |
| *Des: | Testis calpastatin                          |                          |               |                            |                                |           |      |    |   |  |
|       | SEQUEST:(PepMatched Observed.Hits Coverage) |                          |               |                            |                                |           |      |    |   |  |
|       | MASCOT:(PepMatched Observed.Hits Coverage)  | 2                        | 1             | 10.5%                      |                                |           |      |    |   |  |
|       | Seq Charge ObservedMS                       | ExpectedMS               | CalculatedMS  | Pepscore                   | PepHits                        |           |      |    |   |  |
|       | EQLPPMSEDFLLDALSEDFSGPQNASSLK               | +3                       |               | 1055.8384                  | 3164.4933                      | 3164.4859 | 0.01 | 52 | 7 |  |
|       | SESELIDELSEDFDR                             | +2                       | 892.3972      | 1782.7799                  | 1782.7795                      | 0         | 64   | 13 |   |  |
| No.   | Protein                                     | Matched (SEQUEST MASCOT) | Strategy.Hits | PepMatched(SEQUEST MASCOT) | SpectraMatched(SEQUEST MASCOT) |           |      |    |   |  |
| 258.  | IPI00220327                                 | Y                        | Y             | 2                          | 13                             | 3         | 100  | 6  |   |  |
| *Des: | Keratin, type II cytoskeletal 1             |                          |               |                            |                                |           |      |    |   |  |

Identified Human Platelet Proteins

| SEQUEST:(PepMatched Observed.Hits Coverage) |        | 13         | 1          | 21.4%        |          |         |   |
|---------------------------------------------|--------|------------|------------|--------------|----------|---------|---|
| Seq                                         | Charge | Xcor       | Delta      | Proability   | PepHits  |         |   |
| YEELQITAGR                                  | +2     |            | 3.774      | 0.552        | 1.0000   | 19      |   |
| SLVNLGGSKSISISVAR                           |        | +3         | 5.171      | 0.675        | 1.0000   | 27      |   |
| SLDLDSIIAEVK                                | +2     |            | 4.744      | 0.563        | 1.0000   | 17      |   |
| GSGGGSSGGSIGGRGSSSSGGVK                     |        | +2         | 5.785      | 0.656        | 1.0000   | 7       |   |
| GSGGGSSGGSIGGR                              |        | +2         | 2.822      | 0.597        | 0.9843   | 2       |   |
| AEAESLYQSK                                  | +2     |            | 3.614      | 0.582        | 1.0000   | 2       |   |
| SLVNLGGSK                                   | +2     |            | 2.038      | 0.558        | 0.9687   | 18      |   |
| THNLEPYFESFINNLR                            |        | +3         | 4.940      | 0.478        | 0.9985   | 2       |   |
| SKAEAESLYQSK                                | +2     |            | 3.795      | 0.585        | 1.0000   | 4       |   |
| TNAENEFVTIKK                                | +2     |            | 3.325      | 0.502        | 0.9835   | 16      |   |
| SGGGFSSGSAGIINYQR                           |        | +2         | 3.938      | 0.639        | 1.0000   | 9       |   |
| SKAEAESLYQSKYEELQITAGR                      |        | +3         | 5.015      | 0.636        | 1.0000   | 9       |   |
| SLNNQFASFIDKVR                              | +2     |            | 3.336      | 0.557        | 0.9749   | 9       |   |
| MASCOT:(PepMatched Observed.Hits Coverage)  |        | 3          | 1          | 5.96%        |          |         |   |
| Seq                                         | Charge | ObservedMS | ExpectedMS | CalculatedMS | Pepscore | PepHits |   |
| LNDLEDALQQAQ                                | +2     | 679.4016   | 1356.7886  | 1356.6885    | 0.1      | 38      | 2 |
| SLNNQFASFIDK                                | +2     | 692.3990   | 1382.7834  | 1382.6830    | 0.1      | 62      | 2 |
| FLEQQNQVLQTK                                | +2     | 738.4501   | 1474.8856  | 1474.7780    | 0.11     | 62      | 2 |

No. 259. Protein IPI00013454 Matched (SEQUEST MASCOT) Strategy.Hits 1 2 3 4 12  
 \*Des: Splice Isoform 1 of Regulator of G-protein signaling 10

| SEQUEST:(PepMatched Observed.Hits Coverage) |        | 2          | 2          | 19.88%       |          |         |   |
|---------------------------------------------|--------|------------|------------|--------------|----------|---------|---|
| Seq                                         | Charge | Xcor       | Delta      | Proability   | PepHits  |         |   |
| TEEEEEEDLPDAQTAQ                            | +2     |            | 3.969      | 0.628        | 0.9964   | 2       |   |
| EFSEENVLFWLACEDFK                           | +2     |            | 6.097      | 0.583        | 1.0000   | 2       |   |
| MASCOT:(PepMatched Observed.Hits Coverage)  |        | 3          | 3          | 20.45%       |          |         |   |
| Seq                                         | Charge | ObservedMS | ExpectedMS | CalculatedMS | Pepscore | PepHits |   |
| TEEEEEEDLPDAQTAQ                            | +2     | 888.3964   | 1774.7783  | 1774.7744    | 0        | 86      | 4 |
| RTEEEEEEDLPDAQTAQ                           | +2     | 966.4467   | 1930.8788  | 1930.8755    | 0        | 49      | 4 |
| EFSEENVLFWLACEDFK                           | +2     | 1053.4811  | 2104.9476  | 2104.9451    | 0        | 76      | 4 |

No. 260. Protein IPI00550363 Matched (SEQUEST MASCOT) Strategy.Hits 2 5 5 30 30  
 \*Des: Transgelin 2

| SEQUEST:(PepMatched Observed.Hits Coverage) |        | 5          | 4          | 38.91%       |          |         |    |
|---------------------------------------------|--------|------------|------------|--------------|----------|---------|----|
| Seq                                         | Charge | Xcor       | Delta      | Proability   | PepHits  |         |    |
| GASQAGMTGYGMPR                              | +2     |            | 4.244      | 0.596        | 1.0000   | 15      |    |
| NVIGLQMGNTNRGASQAGMTGYGMPR                  |        | +3         | 5.974      | 0.682        | 1.0000   | 2       |    |
| NFSDNQLQEGKNVIGLQMGNTNR                     |        | +3         | 5.298      | 0.634        | 1.0000   | 9       |    |
| GASQAGMTGYGMPRQI                            | +2     |            | 3.527      | 0.581        | 0.9553   | 8       |    |
| TLMNLGGLAVAR                                | +2     |            | 3.731      | 0.550        | 0.9887   | 7       |    |
| MASCOT:(PepMatched Observed.Hits Coverage)  |        | 5          | 3          | 24.63%       |          |         |    |
| Seq                                         | Charge | ObservedMS | ExpectedMS | CalculatedMS | Pepscore | PepHits |    |
| GASQAGMTGYGMPR                              | +2     | 692.3109   | 1382.6072  | 1382.6070    | 0        | 76      | 15 |

Identified Human Platelet Proteins

|                                     |    |          |           |           |           |      |     |
|-------------------------------------|----|----------|-----------|-----------|-----------|------|-----|
| NFSDNQLQEGKNVIGLQMGTR               | +3 | 821.7380 | 2462.1921 | 2462.1971 | 0         | 61   | 9   |
| NVIGLQMGTRGASQAGMTGYGMPR            | +3 | 856.4171 | 2566.2295 | 2566.2202 | 0.01      | 57   | 2   |
| NFSDNQLQEGKNVIGLQMGTRGASQAGMTGYGMPR | +3 |          | 1276.6113 | 3826.8122 | 3826.7936 | 0.02 | 116 |
| TLMNLGGLAVAR                        | +2 | 608.3452 | 1214.6759 | 1214.6805 | 0         | 65   | 7   |

No. 261. Protein IPI00550509 Matched (SEQUEST MASCOT) Strategy.Hits PepMatched(SEQUEST MASCOT) SpectraMatched(SEQUEST MASCOT)  
 N Y 1 0 3 0 3

\*Des:

Ig gamma-1 chain C region

SEQUEST:(PepMatched Observed.Hits Coverage)

MASCOT:(PepMatched Observed.Hits Coverage) 3 1 9.03%

| Seq               | Charge | ObservedMS | ExpectedMS | CalculatedMS | Pepscore | PepHits |
|-------------------|--------|------------|------------|--------------|----------|---------|
| GPSVFPLAPSSK      | +2     | 593.8700   | 1185.7254  | 1185.6393    | 0.09     | 41      |
| FNWYVDGVEVHNAK    | +2     | 839.4669   | 1676.9192  | 1676.7946    | 0.12     | 56      |
| TTPPVLDSDGSFFLYSK | +2     | 937.5151   | 1873.0156  | 1872.9145    | 0.1      | 46      |

No. 262. Protein IPI00218628 Matched (SEQUEST MASCOT) Strategy.Hits PepMatched(SEQUEST MASCOT) SpectraMatched(SEQUEST MASCOT)  
 Y Y 2 4 4 4 18

\*Des:

Splice Isoform 2 of Integrin alpha-IIb precursor

SEQUEST:(PepMatched Observed.Hits Coverage) 4 2 4.87%

Seq Charge Xcor Delta Proability PepHits

|                |    |       |       |        |   |
|----------------|----|-------|-------|--------|---|
| ALSNVEGFER     | +2 | 3.266 | 0.402 | 0.9747 | 2 |
| GQVLVFLGQSEGLR | +2 | 3.830 | 0.562 | 0.9886 | 1 |
| NVGSQTLQTFKAR  | +2 | 3.079 | 0.638 | 0.9798 | 1 |
| VAIVVGAPR      | +2 | 2.791 | 0.666 | 1.0000 | 3 |

MASCOT:(PepMatched Observed.Hits Coverage) 4 3 4.87%

| Seq            | Charge | ObservedMS | ExpectedMS | CalculatedMS | Pepscore | PepHits |
|----------------|--------|------------|------------|--------------|----------|---------|
| ALSNVEGFER     | +2     | 561.2820   | 1120.5495  | 1120.5512    | 0        | 53      |
| GQVLVFLGQSEGLR | +2     | 751.9208   | 1501.8271  | 1501.8252    | 0        | 75      |
| NVGSQTLQTFKAR  | +2     | 725.3943   | 1448.7741  | 1448.7735    | 0        | 47      |
| VAIVVGAPR      | +2     | 441.2814   | 880.5483   | 880.5494     | 0        | 59      |

No. 263. Protein IPI00025252 Matched (SEQUEST MASCOT) Strategy.Hits PepMatched(SEQUEST MASCOT) SpectraMatched(SEQUEST MASCOT)  
 Y Y 2 3 13 23 21

\*Des:

Protein disulfide-isomerase A3 precursor

SEQUEST:(PepMatched Observed.Hits Coverage) 3 4 9.33%

Seq Charge Xcor Delta Proability PepHits

|                      |    |       |       |        |    |
|----------------------|----|-------|-------|--------|----|
| DLLIAYYDVDYK         | +2 | 4.846 | 0.570 | 0.9948 | 18 |
| ELSDFISYLQR          | +2 | 3.169 | 0.407 | 0.9606 | 2  |
| DASIVGFDDSFSEAHSEFLK | +2 | 4.973 | 0.640 | 1.0000 | 5  |

MASCOT:(PepMatched Observed.Hits Coverage) 13 6 34.24%

| Seq          | Charge | ObservedMS | ExpectedMS | CalculatedMS | Pepscore | PepHits |
|--------------|--------|------------|------------|--------------|----------|---------|
| QAGPASVPLR   | +2     | 498.3105   | 994.6064   | 994.5559     | 0.05     | 58      |
| YGVSGYPTLK   | +2     | 542.8208   | 1083.6270  | 1083.5600    | 0.07     | 42      |
| FVMQEEFSR    | +2     | 586.8072   | 1171.5998  | 1171.5331    | 0.07     | 51      |
| LAPEYEAATR   | +2     | 596.3436   | 1190.6726  | 1190.5931    | 0.08     | 59      |
| GFPTIYFSPANK | +2     | 671.3708   | 1340.7270  | 1340.6764    | 0.05     | 45      |
| FLQDYFDGNLK  | +2     | 680.3696   | 1358.7246  | 1358.6506    | 0.07     | 56      |

Identified Human Platelet Proteins

|                          |    |          |           |           |      |    |   |  |
|--------------------------|----|----------|-----------|-----------|------|----|---|--|
| SEPIPESNDGPVK            | +2 | 684.8789 | 1367.7432 | 1367.6568 | 0.09 | 46 | 3 |  |
| ELSDFISYLQR              | +2 | 685.8459 | 1369.6772 | 1369.6877 | 0    | 61 | 2 |  |
| FLQDYFDGNLKR             | +2 | 758.4248 | 1514.8350 | 1514.7517 | 0.08 | 71 | 2 |  |
| MDATANDVPSPYEVR          | +2 | 832.9391 | 1663.8636 | 1663.7511 | 0.11 | 74 | 1 |  |
| VVVAENFDEIVNENK          | +2 | 917.0121 | 1832.0096 | 1831.8951 | 0.11 | 42 | 1 |  |
| DASIVGFFDDSFSEAHSEFLK    | +3 | 783.4166 | 2347.2280 | 2347.0644 | 0.16 | 46 | 1 |  |
| TFSHELSDFGLESTAGEIPVVAIR | +3 | 859.1676 | 2574.4810 | 2574.2965 | 0.18 | 51 | 2 |  |

No. 264. Protein IPI00026128 Matched (SEQUEST MASCOT) Y Y Strategy.Hits 1 PepMatched(SEQUEST MASCOT) 3 SpectraMatched(SEQUEST MASCOT) 4 7 8

\*Des: Syntaxin-11

|                                             |        |            |            |              |         |          |         |
|---------------------------------------------|--------|------------|------------|--------------|---------|----------|---------|
| SEQUEST:(PepMatched Observed.Hits Coverage) |        | 3          | 1          | 15.06%       |         |          |         |
| Seq                                         | Charge | Xcor       | Delta      | Probility    | PepHits |          |         |
| DIQDENQLLVADVK                              | +2     | 3.670      | 0.417      | 0.9768       | 2       |          |         |
| EVSGDQIEDMFEQ GK                            | +2     | 3.939      | 0.552      | 0.9929       | 3       |          |         |
| EVSGDQIEDMFEQGKWDVFSENLLADV K               | +3     | 5.670      | 0.483      | 0.9891       | 3       |          |         |
| MASCOT:(PepMatched Observed.Hits Coverage)  |        | 4          | 6          | 26.71%       |         |          |         |
| Seq                                         | Charge | ObservedMS | ExpectedMS | CalculatedMS |         | PepScore | PepHits |
| DIQDENQLLVADV K                             | +2     | 800.4169   | 1598.8193  | 1598.8151    | 0       | 60       | 2       |
| EVSGDQIEDMFEQ GK                            | +2     | 856.3779   | 1710.7412  | 1710.7406    | 0       | 65       | 3       |
| EVSGDQIEDMFEQGKWDVFSENLLADV K               | +3     | 1076.8433  | 3227.5080  | 3227.4968    | 0.01    | 88       | 3       |
| QYDQQFPDGDDEFD SPHE DIVFETD HILESLYR        | +3     | 1333.9199  | 3998.7379  | 3998.7394    | 0       | 90       | 2       |

No. 265. Protein IPI00514299 Matched (SEQUEST MASCOT) N Y Strategy.Hits 1 PepMatched(SEQUEST MASCOT) 0 SpectraMatched(SEQUEST MASCOT) 2 0 2

\*Des: Hypothetical protein

|                                             |        |            |            |              |      |          |         |
|---------------------------------------------|--------|------------|------------|--------------|------|----------|---------|
| SEQUEST:(PepMatched Observed.Hits Coverage) |        | 2          | 1          | 12.28%       |      |          |         |
| MASCOT:(PepMatched Observed.Hits Coverage)  |        | 2          | 1          | 12.28%       |      |          |         |
| Seq                                         | Charge | ObservedMS | ExpectedMS | CalculatedMS |      | PepScore | PepHits |
| KREEEEEEGSIMNGSTAEDEEQTR                    | +3     | 971.7466   | 2912.2179  | 2911.2260    | 0.99 | 47       | 6       |
| VTGEPKPEITWWFEGEILQDGEDYQYIER               | +3     | 1176.5725  | 3526.6957  | 3526.6568    | 0.04 | 57       | 2       |

No. 266. Protein IPI00298547 Matched (SEQUEST MASCOT) Y Y Strategy.Hits 1 PepMatched(SEQUEST MASCOT) 2 SpectraMatched(SEQUEST MASCOT) 3 3 10

\*Des: DJ-1 protein

|                                             |        |            |            |              |         |          |         |
|---------------------------------------------|--------|------------|------------|--------------|---------|----------|---------|
| SEQUEST:(PepMatched Observed.Hits Coverage) |        | 2          | 1          | 16.58%       |         |          |         |
| Seq                                         | Charge | Xcor       | Delta      | Probility    | PepHits |          |         |
| DVVICPDASLEDAK K                            | +2     | 2.908      | 0.436      | 0.9709       | 2       |          |         |
| GAEEMETVIPVDVMR                             | +2     | 2.869      | 0.507      | 0.9843       | 5       |          |         |
| MASCOT:(PepMatched Observed.Hits Coverage)  |        | 3          | 1          | 26.42%       |         |          |         |
| Seq                                         | Charge | ObservedMS | ExpectedMS | CalculatedMS |         | PepScore | PepHits |
| DVVICPDASLEDAK                              | +2     | 737.8579   | 1473.7013  | 1473.7021    | 0       | 48       | 2       |
| GAEEMETVIPVDVMR                             | +2     | 838.4063   | 1674.7979  | 1674.7956    | 0       | 61       | 4       |
| GPGTSFEFALAIVEALNGK                         | +2     | 961.4998   | 1920.9850  | 1919.9992    | 0.99    | 61       | 13      |

No. 267. Protein IPI00008274 Matched (SEQUEST MASCOT) Y Y Strategy.Hits 3 PepMatched(SEQUEST MASCOT) 3 SpectraMatched(SEQUEST MASCOT) 9 13 30



Identified Human Platelet Proteins

\*Des: Adenylyl cyclase-associated protein 1

| SEQUEST:(PepMatched Observed.Hits Coverage) |        | 3          | 5          | 11.41%         |                      |
|---------------------------------------------|--------|------------|------------|----------------|----------------------|
| Seq                                         | Charge | Xcor       | Delta      | Probability    | PepHits              |
| SALFAQINQGESITHALK                          | +2     |            | 3.224      | 0.417          | 0.9742 3             |
| LGLVFDDVVGIVEIINSK                          | +2     |            | 5.432      | 0.600          | 1.0000 10            |
| ALLVTASQCQQAENK                             | +2     |            | 4.246      | 0.514          | 0.9949 4             |
| MASCOT:(PepMatched Observed.Hits Coverage)  |        | 9          | 9          | 33.4%          |                      |
| Seq                                         | Charge | ObservedMS | ExpectedMS | CalculatedMS   | Pepscore PepHits     |
| VPTISINK                                    | +2     | 436.2904   | 870.5662   | 870.5174 0.05  | 44 8                 |
| EPAVLELEGK                                  | +2     | 542.8267   | 1083.6388  | 1083.5811 0.06 | 40 4                 |
| EFHTTGLAWSK                                 | +2     | 638.8527   | 1275.6908  | 1275.6248 0.07 | 40 2                 |
| LSDLLAPISEDIK                               | +2     | 713.9235   | 1425.8324  | 1425.8079 0.02 | 58 24                |
| EMNDAAMFYTNR                                | +2     | 731.8518   | 1461.6890  | 1461.6016 0.09 | 42 2                 |
| SALFAQINQGESITHALK                          | +2     |            | 964.5457   | 1927.0768      | 1927.0163 0.06 66 26 |
| VENQENVSNLVIETELK                           | +2     |            | 1037.0605  | 2072.1064      | 2072.0273 0.08 65 2  |
| AGAAPYVQAFDSSLGAPVAEYLK                     | +3     |            | 784.4672   | 2350.3798      | 2350.2208 0.16 68 4  |
| ELSGLPSGSPSAGSGPPPPPPGPPPPPVSTSSGSDESASR    | +4     |            | 898.4978   | 3589.9621      | 3589.7172 0.24 49 4  |

| No.  | Protein     | Matched (SEQUENT MASCOT) | Strategy.Hits | PepMatched(SEQUENT MASCOT) | SpectraMatched(SEQUENT MASCOT) |
|------|-------------|--------------------------|---------------|----------------------------|--------------------------------|
| 268. | IPI00219861 | N                        | Y             | 1                          | 0 2 0 11                       |

\*Des: Hypothetical protein ACP1

| SEQUENT:(PepMatched Observed.Hits Coverage) |        | 2          | 2          | 27.32%       |                      |
|---------------------------------------------|--------|------------|------------|--------------|----------------------|
| Seq                                         | Charge | ObservedMS | ExpectedMS | CalculatedMS | Pepscore PepHits     |
| EDFATFDYILCMDESCLR                          | +2     |            | 1091.4772  | 2180.9398    | 2180.9394 0 104 6    |
| QLIIEPPYYGNDSDFETVYQQCVR                    | +2     |            | 1448.1647  | 2894.3148    | 2894.3068 0.01 85 10 |

| No.  | Protein     | Matched (SEQUENT MASCOT) | Strategy.Hits | PepMatched(SEQUENT MASCOT) | SpectraMatched(SEQUENT MASCOT) |
|------|-------------|--------------------------|---------------|----------------------------|--------------------------------|
| 269. | IPI00450866 | N                        | Y             | 1                          | 0 2 0 21                       |

\*Des: Hypothetical protein

| SEQUENT:(PepMatched Observed.Hits Coverage) |        | 2          | 3          | 40%          |                   |
|---------------------------------------------|--------|------------|------------|--------------|-------------------|
| Seq                                         | Charge | ObservedMS | ExpectedMS | CalculatedMS | Pepscore PepHits  |
| VDVDEYDENKFDVDEEDGGDGQAGPDEGEVDSCLR         | +3     |            | 1234.8439  | 3701.5098    | 3701.5070 0 99 9  |
| KVDVDEYDENKFDVDEEDGGDGQAGPDEGEVDSCLR        | +3     |            | 1277.5409  | 3829.6009    | 3829.6019 0 84 12 |

| No.  | Protein     | Matched (SEQUENT MASCOT) | Strategy.Hits | PepMatched(SEQUENT MASCOT) | SpectraMatched(SEQUENT MASCOT) |
|------|-------------|--------------------------|---------------|----------------------------|--------------------------------|
| 270. | IPI00382470 | Y                        | Y             | 1                          | 2 2 3 4                        |

\*Des: Heat shock protein HSP 90-alpha 2

| SEQUENT:(PepMatched Observed.Hits Coverage) |        | 2          | 1          | 5.06%        |                   |
|---------------------------------------------|--------|------------|------------|--------------|-------------------|
| Seq                                         | Charge | Xcor       | Delta      | Probability  | PepHits           |
| NPDDITNEEYGEFYK                             | +2     |            | 4.199      | 0.346        | 0.9803 2          |
| DLVILLYETALLSSGFSLEDPQTHANR                 | +3     |            | 4.517      | 0.567        | 0.9985 2          |
| MASCOT:(PepMatched Observed.Hits Coverage)  |        | 2          | 1          | 5.06%        |                   |
| Seq                                         | Charge | ObservedMS | ExpectedMS | CalculatedMS | Pepscore PepHits  |
| NPDDITNEEYGEFYK                             | +2     |            | 917.3934   | 1832.7722    | 1832.7740 0 55 2  |
| DLVILLYETALLSSGFSLEDPQTHANR                 | +3     |            | 1001.5190  | 3001.5351    | 3001.5396 0 108 2 |

Identified Human Platelet Proteins

No. 271. Protein IPI00028091 Matched (SEQUEST MASCOT) N Y Strategy.Hits 1 0 PepMatched(SEQUEST MASCOT) 6 0 SpectraMatched(SEQUEST MASCOT) 7

\*Des: Actin-like protein 3

SEQUEST:(PepMatched Observed.Hits Coverage)

MASCOT:(PepMatched Observed.Hits Coverage)

| Seq              | Charge | ObservedMS | ExpectedMS | CalculatedMS | Pepscore | PepHits |
|------------------|--------|------------|------------|--------------|----------|---------|
| FMEQVIFK         | +2     | 521.2996   | 1040.5846  | 1040.5364    | 0.05     | 43      |
| QYTGINAISK       | +2     | 547.8353   | 1093.6560  | 1093.5767    | 0.08     | 38      |
| NIVLSGGSTMFR     | +2     | 641.3799   | 1280.7452  | 1280.6546    | 0.09     | 55      |
| DITYFIQQLLR      | +2     | 705.4400   | 1408.8654  | 1408.7714    | 0.09     | 50      |
| HGIVEDWDLMER     | +2     | 750.3906   | 1498.7666  | 1498.6874    | 0.08     | 55      |
| DREVGIPPEQSLETAK | +2     | 885.0192   | 1768.0238  | 1767.9002    | 0.12     | 83      |

No. 272. Protein IPI00003406 Matched (SEQUEST MASCOT) Y Y Strategy.Hits 1 3 PepMatched(SEQUEST MASCOT) 3 4 SpectraMatched(SEQUEST MASCOT) 5

\*Des: Drebrin

SEQUEST:(PepMatched Observed.Hits Coverage)

MASCOT:(PepMatched Observed.Hits Coverage)

| Seq                  | Charge | Xcor  | Delta | Proability | PepHits | Pepscore | PepHits |
|----------------------|--------|-------|-------|------------|---------|----------|---------|
| EESAADWALYTYEDGSDDLK | +2     | 5.119 | 0.661 | 1.0000     | 2       |          |         |
| YVLINWVGEDVPDAR      | +2     | 3.761 | 0.492 | 0.9920     | 1       |          |         |
| LELLAAYEEVIR         | +2     | 3.487 | 0.513 | 0.9933     | 1       |          |         |

  

| Seq                  | Charge | ObservedMS | ExpectedMS | CalculatedMS | Pepscore | PepHits |
|----------------------|--------|------------|------------|--------------|----------|---------|
| LELLAAYEEVIR         | +2     | 709.8990   | 1417.7834  | 1417.7816    | 0        | 78      |
| YVLINWVGEDVPDAR      | +2     | 873.4462   | 1744.8779  | 1744.8784    | 0        | 54      |
| EESAADWALYTYEDGSDDLK | +2     | 1139.4885  | 2276.9625  | 2276.9597    | 0        | 110     |

No. 273. Protein IPI00013894 Matched (SEQUEST MASCOT) N Y Strategy.Hits 1 0 PepMatched(SEQUEST MASCOT) 2 0 SpectraMatched(SEQUEST MASCOT) 2

\*Des: Stress-induced-phosphoprotein 1

SEQUEST:(PepMatched Observed.Hits Coverage)

MASCOT:(PepMatched Observed.Hits Coverage)

| Seq               | Charge | ObservedMS | ExpectedMS | CalculatedMS | Pepscore | PepHits |
|-------------------|--------|------------|------------|--------------|----------|---------|
| LAYINPDLALEEK     | +2     | 744.9360   | 1487.8574  | 1487.7871    | 0.07     | 71      |
| AMADPEVQQIMSDPAMR | +2     | 945.5109   | 1889.0072  | 1888.8481    | 0.16     | 39      |

No. 274. Protein IPI00220402 Matched (SEQUEST MASCOT) N Y Strategy.Hits 1 0 PepMatched(SEQUEST MASCOT) 2 0 SpectraMatched(SEQUEST MASCOT) 10

\*Des: Protein phosphatase inhibitor 2

SEQUEST:(PepMatched Observed.Hits Coverage)

MASCOT:(PepMatched Observed.Hits Coverage)

| Seq                                    | Charge | ObservedMS | ExpectedMS | CalculatedMS | Pepscore | PepHits |
|----------------------------------------|--------|------------|------------|--------------|----------|---------|
| IQEQESSGEEDSDLSPEER                    | +2     | 1082.4636  | 2162.9127  | 2162.9087    | 0        | 89      |
| DLHDDDEDEEMLETADGESMNTTEESNQGSTPSDQQNK | +3     | 1423.5637  | 4267.6693  | 4267.6673    | 0        | 100     |

No. Protein Matched (SEQUEST MASCOT) Strategy.Hits PepMatched(SEQUEST MASCOT) SpectraMatched(SEQUEST MASCOT)

Identified Human Platelet Proteins

|       |                                                  |                          |               |                            |                                |           |           |         |    |   |
|-------|--------------------------------------------------|--------------------------|---------------|----------------------------|--------------------------------|-----------|-----------|---------|----|---|
| 275.  | IPI00011285                                      | Y                        | N             | 1                          | 2                              | 0         | 6         | 0       |    |   |
| *Des: | Calpain-1 catalytic subunit                      |                          |               |                            |                                |           |           |         |    |   |
|       | SEQUEST:(PepMatched Observed.Hits Coverage)      |                          |               |                            | 2                              | 3         | 6.74%     |         |    |   |
|       | Seq                                              | Charge                   | Xcor          | Delta                      | Proability                     | PepHits   |           |         |    |   |
|       | SAGTVELDDQIQANLPDEQVLSEEEIDENFK                  |                          |               |                            | +3                             | 3.628     | 0.351     | 0.9847  | 2  |   |
|       | TLDTDLDGVTDFDLFK                                 |                          |               |                            | +2                             | 3.661     | 0.630     | 0.9944  | 2  |   |
|       | MASCOT:(PepMatched Observed.Hits Coverage)       |                          |               |                            |                                |           |           |         |    |   |
| No.   | Protein                                          | Matched (SEQUEST MASCOT) | Strategy.Hits | PepMatched(SEQUEST MASCOT) | SpectraMatched(SEQUEST MASCOT) |           |           |         |    |   |
| 276.  | IPI00022350                                      | Y                        | Y             | 1                          | 2                              | 2         | 3         | 4       |    |   |
| *Des: | RGC32 protein                                    |                          |               |                            |                                |           |           |         |    |   |
|       | SEQUEST:(PepMatched Observed.Hits Coverage)      |                          |               |                            | 2                              | 1         | 25%       |         |    |   |
|       | Seq                                              | Charge                   | Xcor          | Delta                      | Proability                     | PepHits   |           |         |    |   |
|       | ELEAFIADLDK                                      |                          |               |                            | +2                             | 3.329     | 0.440     | 0.9575  | 2  |   |
|       | SSASVSDSSGFSDESADSLYR                            |                          |               |                            | +2                             | 4.593     | 0.616     | 0.9883  | 6  |   |
|       | MASCOT:(PepMatched Observed.Hits Coverage)       |                          |               |                            | 2                              | 1         | 25%       |         |    |   |
|       | Seq                                              | Charge                   | ObservedMS    | ExpectedMS                 | CalculatedMS                   | Pepscore  |           | PepHits |    |   |
|       | ELEAFIADLDK                                      |                          |               | +2                         | 632.3264                       | 1262.6383 | 1262.6394 | 0       | 82 | 2 |
|       | SSASVSDSSGFSDESADSLYR                            |                          |               | +2                         | 1120.9750                      | 2239.9354 | 2239.9352 | 0       | 79 | 2 |
| No.   | Protein                                          | Matched (SEQUEST MASCOT) | Strategy.Hits | PepMatched(SEQUEST MASCOT) | SpectraMatched(SEQUEST MASCOT) |           |           |         |    |   |
| 277.  | IPI00003269                                      | Y                        | N             | 2                          | 4                              | 0         | 38        | 0       |    |   |
| *Des: | HypotHetical protein LOC345651                   |                          |               |                            |                                |           |           |         |    |   |
|       | SEQUEST:(PepMatched Observed.Hits Coverage)      |                          |               |                            | 4                              | 19        | 13.57%    |         |    |   |
|       | Seq                                              | Charge                   | Xcor          | Delta                      | Proability                     | PepHits   |           |         |    |   |
|       | HQGVMVGMGQK                                      |                          |               |                            | +2                             | 3.592     | 0.664     | 1.0000  | 30 |   |
|       | SYELPDGQVITIGNER                                 |                          |               |                            | +2                             | 4.482     | 0.573     | 1.0000  | 21 |   |
|       | HQGVMVGMGQKDCYVGDEAQSKR                          |                          |               |                            | +3                             | 3.263     | 0.650     | 0.9994  | 17 |   |
|       | IKIIPPERK                                        |                          |               |                            | +2                             | 2.675     | 0.645     | 0.9789  | 14 |   |
|       | MASCOT:(PepMatched Observed.Hits Coverage)       |                          |               |                            |                                |           |           |         |    |   |
| No.   | Protein                                          | Matched (SEQUEST MASCOT) | Strategy.Hits | PepMatched(SEQUEST MASCOT) | SpectraMatched(SEQUEST MASCOT) |           |           |         |    |   |
| 278.  | IPI00413492                                      | N                        | Y             | 1                          | 0                              | 2         | 0         | 4       |    |   |
| *Des: | Calpastatin isoform b                            |                          |               |                            |                                |           |           |         |    |   |
|       | SEQUEST:(PepMatched Observed.Hits Coverage)      |                          |               |                            | 2                              | 1         | 5.73%     |         |    |   |
|       | MASCOT:(PepMatched Observed.Hits Coverage)       |                          |               |                            | 2                              | 1         | 5.73%     |         |    |   |
|       | Seq                                              | Charge                   | ObservedMS    | ExpectedMS                 | CalculatedMS                   | Pepscore  |           | PepHits |    |   |
|       | DTSQSDKLDDALDKLSDSLGQR                           |                          |               | +3                         | 841.4006                       | 2521.1801 | 2521.1780 | 0       | 65 | 1 |
|       | SESELIDELSEDFDR                                  |                          |               | +2                         | 892.3979                       | 1782.7812 | 1782.7795 | 0       | 62 | 3 |
| No.   | Protein                                          | Matched (SEQUEST MASCOT) | Strategy.Hits | PepMatched(SEQUEST MASCOT) | SpectraMatched(SEQUEST MASCOT) |           |           |         |    |   |
| 279.  | IPI00003843                                      | Y                        | Y             | 1                          | 4                              | 3         | 5         | 20      |    |   |
| *Des: | Splice Isoform A1 of Tight junction protein ZO-2 |                          |               |                            |                                |           |           |         |    |   |
|       | SEQUEST:(PepMatched Observed.Hits Coverage)      |                          |               |                            | 4                              | 4         | 7.85%     |         |    |   |
|       | Seq                                              | Charge                   | Xcor          | Delta                      | Proability                     | PepHits   |           |         |    |   |
|       | SILKPSTPIPPQEGEEVGESSEEQDNAPK                    |                          |               |                            | +3                             | 3.133     | 0.394     | 0.9775  | 5  |   |
|       | KVQVAALQASPPLDQDDR                               |                          |               |                            | +2                             | 3.362     | 0.448     | 0.9804  | 3  |   |

Identified Human Platelet Proteins

|          |                                                        |                          |               |                            |                                |           |           |           |           |      |          |         |  |
|----------|--------------------------------------------------------|--------------------------|---------------|----------------------------|--------------------------------|-----------|-----------|-----------|-----------|------|----------|---------|--|
|          | AFEVMDEFDGR                                            | +2                       | 2.747         | 0.544                      | 0.9878                         | 2         |           |           |           |      |          |         |  |
|          | LAGGNDVGIFVAGIQEGTSAEQEGLQEGDQILK                      |                          |               |                            |                                | +3        | 5.553     | 0.520     | 0.9981    | 1    |          |         |  |
|          | MASCOT:(PepMatched Observed.Hits Coverage) 3 6 6.52%   |                          |               |                            |                                |           |           |           |           |      |          |         |  |
|          | Seq                                                    | Charge                   | ObservedMS    | ExpectedMS                 | CalculatedMS                   |           |           |           |           |      | PepScore | PepHits |  |
|          | AFEVMDEFDGR                                            | +2                       | 658.2850      | 1314.5554                  | 1314.5550                      | 0         | 53        | 5         |           |      |          |         |  |
|          | LAGGNDVGIFVAGIQEGTSAEQEGLQEGDQILK                      |                          |               |                            |                                | +3        | 1115.2355 | 3342.6846 | 3342.6578 | 0.03 | 62       | 8       |  |
|          | DNPHEFENGETSIVISDVLPGGPADGLLQENDR                      |                          |               |                            |                                | +3        | 1136.2076 | 3405.6011 | 3404.6120 | 0.99 | 105      | 10      |  |
| No. 280. | Protein                                                | Matched (SEQUEST MASCOT) | Strategy.Hits | PepMatched(SEQUEST MASCOT) | SpectraMatched(SEQUEST MASCOT) |           |           |           |           |      |          |         |  |
|          | IPI00219365                                            | Y                        | Y             | 1                          | 2                              | 2         | 3         | 20        |           |      |          |         |  |
| *Des:    | Moesin                                                 |                          |               |                            |                                |           |           |           |           |      |          |         |  |
|          | SEQUEST:(PepMatched Observed.Hits Coverage) 2 1 5.46%  |                          |               |                            |                                |           |           |           |           |      |          |         |  |
|          | Seq                                                    | Charge                   | Xcor          | Delta                      | Proability                     | PepHits   |           |           |           |      |          |         |  |
|          | EVWFFGLQYQDTK                                          | +2                       | 2.801         | 0.576                      | 0.9875                         | 1         |           |           |           |      |          |         |  |
|          | FYPEDVSEELIQDITQR                                      | +2                       |               | 3.399                      | 0.496                          | 0.9852    | 2         |           |           |      |          |         |  |
|          | MASCOT:(PepMatched Observed.Hits Coverage) 2 8 8.53%   |                          |               |                            |                                |           |           |           |           |      |          |         |  |
|          | Seq                                                    | Charge                   | ObservedMS    | ExpectedMS                 | CalculatedMS                   |           |           |           |           |      | PepScore | PepHits |  |
|          | FYPEDVSEELIQDITQR                                      |                          | +3            | 694.6704                   | 2080.9894                      | 2080.9953 | 0         | 45        | 4         |      |          |         |  |
|          | TAMSTPHVAEPAENEQDEQDENGAEASADLR                        |                          |               |                            | +3                             | 1105.1411 | 3312.4015 | 3311.4120 | 0.99      | 61   | 10       |         |  |
| No. 281. | Protein                                                | Matched (SEQUEST MASCOT) | Strategy.Hits | PepMatched(SEQUEST MASCOT) | SpectraMatched(SEQUEST MASCOT) |           |           |           |           |      |          |         |  |
|          | IPI00293975                                            | Y                        | N             | 1                          | 2                              | 0         | 4         | 0         |           |      |          |         |  |
| *Des:    | Glutathione peroxidase 1 isoform 1                     |                          |               |                            |                                |           |           |           |           |      |          |         |  |
|          | SEQUEST:(PepMatched Observed.Hits Coverage) 2 2 19.32% |                          |               |                            |                                |           |           |           |           |      |          |         |  |
|          | Seq                                                    | Charge                   | Xcor          | Delta                      | Proability                     | PepHits   |           |           |           |      |          |         |  |
|          | EALPAPSDDATALMTDPK                                     | +2                       |               | 3.224                      | 0.467                          | 0.9848    | 2         |           |           |      |          |         |  |
|          | FQTIDIEPDIEALLSQGPSC                                   | +2                       |               | 5.037                      | 0.590                          | 1.0000    | 2         |           |           |      |          |         |  |
|          | MASCOT:(PepMatched Observed.Hits Coverage)             |                          |               |                            |                                |           |           |           |           |      |          |         |  |
| No. 282. | Protein                                                | Matched (SEQUEST MASCOT) | Strategy.Hits | PepMatched(SEQUEST MASCOT) | SpectraMatched(SEQUEST MASCOT) |           |           |           |           |      |          |         |  |
|          | IPI00377005                                            | N                        | Y             | 1                          | 0                              | 2         | 0         | 2         |           |      |          |         |  |
| *Des:    | 29 kDa protein                                         |                          |               |                            |                                |           |           |           |           |      |          |         |  |
|          | SEQUEST:(PepMatched Observed.Hits Coverage)            |                          |               |                            |                                |           |           |           |           |      |          |         |  |
|          | MASCOT:(PepMatched Observed.Hits Coverage) 2 1 5.55%   |                          |               |                            |                                |           |           |           |           |      |          |         |  |
|          | Seq                                                    | Charge                   | ObservedMS    | ExpectedMS                 | CalculatedMS                   |           |           |           |           |      | PepScore | PepHits |  |
|          | MELQELQLK                                              | +2                       | 566.3069      | 1130.5992                  | 1130.6005                      | 0         | 62        | 1         |           |      |          |         |  |
|          | DEEKMELQELQLK                                          | +2                       | 816.9116      | 1631.8086                  | 1631.8076                      | 0         | 47        | 1         |           |      |          |         |  |
| No. 283. | Protein                                                | Matched (SEQUEST MASCOT) | Strategy.Hits | PepMatched(SEQUEST MASCOT) | SpectraMatched(SEQUEST MASCOT) |           |           |           |           |      |          |         |  |
|          | IPI00219299                                            | Y                        | N             | 1                          | 3                              | 0         | 14        | 0         |           |      |          |         |  |
| *Des:    | Talin 2                                                |                          |               |                            |                                |           |           |           |           |      |          |         |  |
|          | SEQUEST:(PepMatched Observed.Hits Coverage) 3 1 1.39%  |                          |               |                            |                                |           |           |           |           |      |          |         |  |
|          | Seq                                                    | Charge                   | Xcor          | Delta                      | Proability                     | PepHits   |           |           |           |      |          |         |  |
|          | VMVTNVTSLK                                             | +2                       | 3.911         | 0.581                      | 1.0000                         | 16        |           |           |           |      |          |         |  |
|          | MTKGITMATAK                                            | +2                       | 3.270         | 0.502                      | 0.9717                         | 6         |           |           |           |      |          |         |  |
|          | EVANSTANLVK                                            | +2                       | 2.753         | 0.486                      | 0.9744                         | 6         |           |           |           |      |          |         |  |
|          | MASCOT:(PepMatched Observed.Hits Coverage)             |                          |               |                            |                                |           |           |           |           |      |          |         |  |

Identified Human Platelet Proteins

| No.   | Protein                                     | Matched (SEQUEST MASCOT) | Strategy   | Hits       | PepMatched (SEQUEST MASCOT) | SpectraMatched (SEQUEST MASCOT)         |
|-------|---------------------------------------------|--------------------------|------------|------------|-----------------------------|-----------------------------------------|
| 284.  | IPI00023591                                 | Y Y                      | 1          | 2          | 2                           | 3 3                                     |
| *Des: | Transcriptional activator protein PUR-alpha |                          |            |            |                             |                                         |
|       | SEQUEST:(PepMatched Observed.Hits Coverage) |                          |            |            | 2                           | 1 8.23%                                 |
|       | Seq                                         | Charge                   | Xcor       | Delta      | Probability                 | PepHits                                 |
|       | LIDDYGVEEPAELPEGTS                          |                          |            |            | +3                          | 4.137 0.407 0.9941 2                    |
|       | LIDDYGVEEPAELPEGTS                          |                          |            |            | +2                          | 3.443 0.451 0.9768 2                    |
|       | MASCOT:(PepMatched Observed.Hits Coverage)  |                          |            |            | 2                           | 1 8.23%                                 |
|       | Seq                                         | Charge                   | ObservedMS | ExpectedMS | CalculatedMS                | Pepscore PepHits                        |
|       | LIDDYGVEEPAELPEGTS                          |                          |            |            | +2                          | 1367.1606 2732.3067 2732.2915 0.02 41 2 |
|       | LIDDYGVEEPAELPEGTS                          |                          |            |            | +3                          | 963.8053 2888.3941 2888.3926 0 77 2     |
