# Supplementary material
Source: PubMed Central journal article supplement (PMC4302335)
Supplement: NIHMS258838-supplement-Table_5.pdf [file NIHMS258838-supplement-Table_5.pdf]

| Type                     | HUMAN       |                                                                | RAT         |                                                                |
|--------------------------|-------------|----------------------------------------------------------------|-------------|----------------------------------------------------------------|
|                          | Accession   | Description                                                    | Accession   | Description                                                    |
| <b>Adenylate</b>         | IPI00018342 | Adenylate kinase isoenzyme 1                                   | IPI00390733 | PREDICTED: similar to Adenylate kinase 2                       |
|                          | IPI0021898  | Splice-Isoform4 of Adenylate kinase isoenzyme-2                | IPI00230857 | Adenylate kinase isoenzyme 2                                   |
|                          | IPI00172460 | Adenylate kinase 2 isoform c                                   |             |                                                                |
| <b>cAMP-related</b>      | IPI00021831 | cAMP-dependent protein kinase type I-alpha regulatory subunit  | IPI00196684 | cAMP-dependent protein kinase type II-alpha regulatory subunit |
|                          | IPI00554488 | cAMP-dependent protein kinase type I-beta regulatory subunit   | IPI00231770 | cAMP-dependent protein kinase type I-alpha regulatory subunit  |
|                          | IPI00219774 | cAMP-dependent protein kinase type II-alpha regulatory subunit | IPI00365600 | cAMP-dependent protein kinase type II-beta regulatory subunit  |
|                          | IPI00554752 | cAMP-dependent protein kinase type II-beta regulatory subunit  | IPI00200013 | PREDICTED: cAMP-dependent protein kinase catalytic subunit     |
|                          | IPI00011891 | 5'-AMP-activated protein kinase, catalytic alpha-1 chain       | IPI00231108 | 5'-AMP-activated protein kinase, beta-1 subunit                |
|                          | IPI00427586 | cGMP-dependent protein kinase 1, alpha isozyme                 | IPI00196645 | 5'-AMP-activated protein kinase, gamma-1 subunit               |
|                          |             |                                                                |             |                                                                |
| <b>Glyco-related</b>     | IPI00023729 | Fructosamine-3-kinase                                          | IPI00202543 | Hexokinase, type I                                             |
|                          | IPI00019383 | Galactokinase                                                  |             |                                                                |
|                          | IPI00005118 | Hexokinase type III                                            |             |                                                                |
|                          | IPI00099986 | Ketosamine-3-kinase                                            |             |                                                                |
|                          | IPI00296526 | N-acetylglucosamine kinase                                     |             |                                                                |
|                          | IPI00018246 | Splice Isoform 1 of Hexokinase, type I                         |             |                                                                |
|                          | IPI00301518 | Splice Isoform 1 of Mps one binder kinase activator-like 1B    |             |                                                                |
|                          | IPI00220667 | Splice Isoform 4 of Hexokinase, type I                         |             |                                                                |
| <b>Mitogen-activated</b> |             | Mitogen-activated protein kinase 1                             |             | Mitogen-activated protein kinase 1                             |
|                          | IPI00003479 |                                                                | IPI00199688 | Dual specificity mitogen-activated protein kinase kinase 2     |
|                          |             | Mitogen-activated protein kinase 14 isoform 4                  |             |                                                                |
|                          | IPI00221143 |                                                                | IPI00231331 | Dual specificity mitogen-activated protein kinase kinase 1     |
|                          |             | IPI00231247                                                    |             |                                                                |

|                               |             |                                                                                           |             |                                                                            |
|-------------------------------|-------------|-------------------------------------------------------------------------------------------|-------------|----------------------------------------------------------------------------|
|                               | IPI00009790 | 6-phosphofructokinase, type C                                                             | IPI00194404 | Nucleoside diphosphate kinase<br>A                                         |
|                               | IPI00291412 | Ca(2+)/calmodulin-dependent<br>protein kinase phosphatase                                 | IPI00325189 | Nucleoside diphosphate kinase<br>B                                         |
|                               | IPI00012048 | Nucleoside diphosphate kinase<br>A                                                        | IPI00212741 | Phosphofructokinase, liver,<br>B-type                                      |
|                               | IPI00026260 | Nucleoside diphosphate kinase<br>B                                                        | IPI00231426 | Phosphoglycerate kinase 1                                                  |
|                               | IPI00009688 | Phosphatidylinositol-4-phospha<br>te 5-kinase type II alpha                               | IPI00565738 | Phosphoglycerate kinase 1                                                  |
| <b>Phosphate<br/>-related</b> | IPI00169383 | Phosphoglycerate kinase 1                                                                 | IPI00288140 | Ribose-phosphate<br>pyrophosphokinase II                                   |
|                               | IPI00220648 | Phosphomevalonate kinase                                                                  | IPI00231303 | Ribose-phosphate<br>pyrophosphokinase I-like                               |
|                               | IPI00219617 | Ribose-phosphate<br>pyrophosphokinase II                                                  |             |                                                                            |
|                               | IPI00218371 | Ribose-phosphate<br>pyrophosphokinase III                                                 |             |                                                                            |
|                               | IPI00216470 | Splice Isoform 1 of<br>Phosphatidylinositol-4-phospha<br>te 5-kinase type II beta         |             |                                                                            |
|                               | IPI00235352 | Splice Isoform 2 of<br>Phosphatidylinositol-4-phospha<br>te 5-kinase type II beta         |             |                                                                            |
|                               | IPI00385449 | Protein kinase C, alpha type                                                              | IPI00201792 | Protein kinase C, alpha type                                               |
|                               | IPI00329236 | Protein kinase C, delta type<br>Splice Isoform 2 of Protein<br>kinase C and casein kinase |             |                                                                            |
| <b>Protein kinase</b>         | IPI00221111 | substrate in neurons protein 2<br>Splice Isoform Beta-I of Protein                        |             |                                                                            |
|                               | IPI00010466 | kinase C, beta type<br>Splice Isoform Beta-II of Protein                                  |             |                                                                            |
|                               | IPI00219628 | kinase C, beta type                                                                       |             |                                                                            |
|                               |             | Pyruvate dehydrogenase<br>kinase isozyme 1, mitochondrial<br>precursor                    | IPI00209436 | PREDICTED: similar to<br>pyruvate kinase (EC 2.7.1.40)<br>isozyme M2       |
|                               | IPI00014831 | Pyruvate kinase 3 isoform 1<br>variant                                                    | IPI00562537 | PREDICTED: similar to<br>pyruvate kinase (EC 2.7.1.40)<br>isozyme M2 - rat |
| <b>Pyruvate kinase</b>        | IPI00479186 | Pyruvate kinase 3 isoform 2                                                               | IPI00212249 | PREDICTED: similar to<br>pyruvate kinase 3                                 |
|                               | IPI00220644 | Pyruvate kinase M2                                                                        |             | Pyruvate kinase, muscle                                                    |
|                               | IPI00383237 |                                                                                           | IPI00231929 |                                                                            |

|                                    |             |                                                                                                            |             |                                                                                     |
|------------------------------------|-------------|------------------------------------------------------------------------------------------------------------|-------------|-------------------------------------------------------------------------------------|
|                                    |             | Serine/threonine kinase 4                                                                                  |             | PREDICTED: similar to<br>Serine/threonine protein kinase<br>24                      |
|                                    | IPI00011488 |                                                                                                            | IPI00561114 |                                                                                     |
|                                    |             | Serine/threonine kinase TAO1                                                                               |             | PREDICTED: similar to<br>serine/threonine protein kinase<br>MST4a                   |
|                                    | IPI00002232 |                                                                                                            | IPI00370130 |                                                                                     |
|                                    |             | Serine/threonine-protein kinase<br>3                                                                       |             | Serine/threonine kinase 25                                                          |
|                                    | IPI00411984 |                                                                                                            | IPI00390595 |                                                                                     |
|                                    |             | Serine/threonine-protein kinase<br>PAK 2                                                                   |             | Serine/threonine kinase<br>receptor associated protein                              |
|                                    | IPI00219447 |                                                                                                            | IPI00364585 |                                                                                     |
| <b>Serine/threonine<br/>kinase</b> |             | Serine-threonine kinase<br>receptor-associated protein                                                     |             |                                                                                     |
|                                    | IPI00294536 |                                                                                                            |             |                                                                                     |
|                                    |             | Splice Isoform 1 of<br>Serine/threonine-protein kinase<br>13                                               |             |                                                                                     |
|                                    | IPI00099756 |                                                                                                            |             |                                                                                     |
|                                    |             | Splice Isoform 1 of<br>Serine/threonine-protein kinase<br>Duet                                             |             |                                                                                     |
|                                    | IPI00021156 |                                                                                                            |             |                                                                                     |
|                                    |             | Splice Isoform A of<br>Serine/threonine-protein kinase<br>24                                               |             |                                                                                     |
|                                    | IPI00335281 |                                                                                                            |             |                                                                                     |
|                                    |             | Splice Isoform 2 of<br>Proto-oncogene<br>tyrosine-protein kinase Src                                       |             |                                                                                     |
|                                    | IPI00479211 |                                                                                                            |             |                                                                                     |
| <b>Tyrosine-protein<br/>kinase</b> |             | Splice Isoform Short of<br>Tyrosine-protein kinase SYK                                                     |             | Megakaryocyte-associated<br>tyrosine-protein kinase<br>Neuronal C-SRC               |
|                                    | IPI00218278 |                                                                                                            | IPI00191366 |                                                                                     |
|                                    |             | Tyrosine-protein kinase BTK                                                                                |             | tyrosine-specific protein kinase                                                    |
|                                    | IPI00029132 |                                                                                                            | IPI00200886 |                                                                                     |
|                                    |             | Tyrosine-protein kinase CSK                                                                                |             | Protein tyrosine kinase 9<br>Splice Isoform LYN B of<br>Tyrosine-protein kinase Lyn |
| IPI00013212                        |             | IPI00361693                                                                                                |             |                                                                                     |
|                                    |             | IPI00195871                                                                                                |             |                                                                                     |
| <b>Other</b>                       |             | Calcium/calmodulin-dependent<br>protein kinase type 1                                                      |             | Creatine kinase, B chain                                                            |
|                                    | IPI00028296 |                                                                                                            | IPI00470288 |                                                                                     |
|                                    |             | Creatine kinase, B chain                                                                                   |             | Integrin-linked kinase ILK                                                          |
|                                    | IPI00022977 |                                                                                                            | IPI00194728 |                                                                                     |
|                                    |             | Cyclin-dependent kinase 4<br>inhibitor D                                                                   |             | PREDICTED: similar to<br>Myosin, light polypeptide<br>kinase, telokin isoform       |
|                                    | IPI00024008 |                                                                                                            | IPI00370703 |                                                                                     |
|                                    |             | Integrin-linked protein kinase 1                                                                           |             | PREDICTED: similar to Traf2<br>and NCK interacting kinase,<br>splice variant 4      |
|                                    | IPI00013219 |                                                                                                            | IPI00372166 |                                                                                     |
|                                    |             | Integrin-linked protein kinase 2<br>PREDICTED: similar to<br>PI-3-kinase-related kinase<br>SMG-1 isoform 1 |             |                                                                                     |
| IPI00025644                        |             |                                                                                                            |             |                                                                                     |
|                                    |             |                                                                                                            |             |                                                                                     |
| IPI00399173                        |             |                                                                                                            |             |                                                                                     |

---

|              |             |                               |
|--------------|-------------|-------------------------------|
|              |             | Rho-associated protein kinase |
|              | IPI00022542 | 1                             |
|              |             | Rho-associated protein kinase |
|              | IPI00307155 | 2                             |
| <b>Other</b> |             | Splice Isoform 1 of TRAF2 and |
|              | IPI00145805 | NCK interacting kinase        |
|              |             | Splice Isoform 3B of Myosin   |
|              |             | light chain kinase, smooth    |
|              |             | muscle and non-muscle         |
|              | IPI00472311 | isozymes                      |
|              | IPI00219953 | UMP-CMP kinase variant        |

---
